# Supplementary material
Source: PubMed Central journal article supplement (PMC6680023)
Supplement: NIHMS1042823-supplement-SI.pdf [file NIHMS1042823-supplement-SI.pdf]

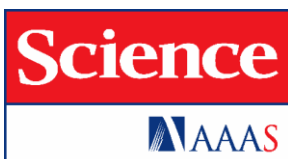

## Supplementary Materials for

### Direct arene C–H fluorination with $^{18}\text{F}^-$ via organic photoredox catalysis

Wei Chen\*, Zeng Huang\*, Nicholas E. S. Tay\*, Benjamin Giglio, Mengzhe Wang, Hui Wang, Zhanhong Wu, David A. Nicewicz†, Zibo Li†

\*These authors contributed equally to this work.

†Corresponding author. Email: nicewicz@unc.edu (D.A.N.); ziboli@med.unc.edu (Z.L.)

Published 21 June 2019, *Science* **364**, 1170 (2019)  
DOI: 10.1126/science.aav7019

#### This PDF file includes:

Materials and Methods  
Figs. S1 to S101  
Tables S1 to S58  
Spectral Data  
Radio-HPLC Traces  
Captions for Movies S1 to S3  
References

**Other Supplementary Material for this manuscript includes the following:**  
(available at science.sciencemag.org/content/364/6446/1170/suppl/DC1)

Movies S1 to S3 (.mp4)

## Table of Contents

|                                                                                                                                                          |             |
|----------------------------------------------------------------------------------------------------------------------------------------------------------|-------------|
| <b>1. Materials and Methods</b>                                                                                                                          | <b>S3</b>   |
| 1.1 General reagent information                                                                                                                          |             |
| 1.2 General analytical information                                                                                                                       |             |
| 1.3 Photoreactor configuration (LEDs)                                                                                                                    |             |
| 1.4 Radiochemistry                                                                                                                                       |             |
| <b>2. Optimization Studies for Arene C-H <sup>19</sup>F-fluorination</b>                                                                                 | <b>S6</b>   |
| <b>3. Experimental Procedures: Catalyst and Substrate Synthesis</b>                                                                                      | <b>S7</b>   |
| 3.1 Preparation of acridinium photocatalysts                                                                                                             |             |
| 3.2 Preparation of arene substrates (S2-S23)                                                                                                             |             |
| 3.3 Preparation of aromatic fluorinated standards (7, 12, 13, 14, 17, 19, 20 [2-F], 21-24, 26-37) and corresponding synthetic intermediates (i-1 - i-32) |             |
| <b>4. Synthesis and Analysis of Fluorinated HPLC Standards for Arene C-H Fluorination</b>                                                                | <b>S54</b>  |
| 4.1 General C-H fluorination procedure for CsF as the fluorine source                                                                                    |             |
| 4.2 General C-H fluorination procedure for TBAF as the fluorine source                                                                                   |             |
| 4.3 General HPLC condition                                                                                                                               |             |
| <b>5. Experimental Procedures for Radiochemistry</b>                                                                                                     | <b>S56</b>  |
| 5.1 Synthesis of [ <sup>18</sup> F]TBAF, [ <sup>18</sup> F]CsF, [ <sup>18</sup> F]KF, K[ <sup>18</sup> F]F-kryptofix                                     |             |
| 5.2 General HPLC conditions                                                                                                                              |             |
| 5.3 General procedure for the synthesis of <sup>18</sup> F-fluoroarenes                                                                                  |             |
| 5.4 Comparison of isolation, radio-TLC and radio-HPLC yields for the radiofluorination of diphenyl ether.                                                |             |
| 5.5 Summary of reaction optimization for arene radiofluorination                                                                                         |             |
| 5.6 Radio-HPLC analysis and characterization for <sup>18</sup> F-radiolabeled arenes                                                                     |             |
| <b>6. Positron Emission Tomography (PET) and Computed Tomography (CT) Imaging Studies</b>                                                                | <b>S121</b> |
| 6.1 <i>Ex vivo</i> PET/CT imaging of mouse ear inflammation models                                                                                       |             |
| 6.2 <i>In vivo</i> PET/CT imaging of mouse tumor models                                                                                                  |             |
| <b>7. Mechanism Proposal and Computational Data</b>                                                                                                      | <b>S125</b> |
| <b>8. Spectra Data for New Compounds (<sup>1</sup>H NMR, <sup>13</sup>C NMR, and <sup>19</sup>F NMR; IR)</b>                                             | <b>S129</b> |
| <b>9. Movie Captions</b>                                                                                                                                 | <b>S320</b> |
| <b>10. References</b>                                                                                                                                    | <b>S321</b> |

## 1. Materials and Methods

### 1.1 General Reagent Information

Commercially available reagents were purchased from Sigma-Aldrich, Acros, Alfa Aesar, or TCI, Matrix Scientific, Combi-Blocks, Oakwood Chemical, Chem Impex International, and Fisher Scientific and were used as received unless otherwise noted. Diethyl ether (Et<sub>2</sub>O), dichloromethane (DCM), tetrahydrofuran (THF), toluene (PhMe), and dimethylformamide (DMF) were dried by passing through activated alumina under nitrogen prior to use. Other common solvents and chemical reagents were purified by standard published methods as noted or used as received. All catalyst and substrate syntheses were run under a nitrogen atmosphere unless specified otherwise.

The following compounds employed as reagents in the photoredox-catalyzed C-H (radio)fluorination were obtained from commercial vendors and used as received: diphenyl ether, biphenyl, naphthalene, 2-bromoanisole, 2-chloroanisole, 2-methoxyacetophenone, 2-methoxybenzonitrile, *o*-anisaldehyde, *p*-anisaldehyde, 4-methoxyacetophenone, 4-methoxybenzophenone, 3-methoxyacetophenone, mesitylene, 3,5-dimethoxypyridine, 2-chloro-5-fluoro-6-methoxyquinoline, 2-methylbenzo[*d*]oxazole, clofibrate, and fenofibrate.

### 1.2 General Analytical Information

Proton, carbon, and fluorine nuclear magnetic resonance spectra (<sup>1</sup>H NMR, <sup>13</sup>C NMR, <sup>19</sup>F NMR) were recorded on a Bruker Avance 400 (<sup>1</sup>H NMR at 400 MHz, <sup>13</sup>C NMR at 100 MHz, and <sup>19</sup>F NMR at 376 MHz), a Bruker Avance III 600 (<sup>1</sup>H NMR at 600 MHz, <sup>13</sup>C NMR at 151 MHz, and <sup>19</sup>F NMR at 565 MHz) spectrometer, an Inova 700 MHz (<sup>1</sup>H NMR at 700 MHz, <sup>13</sup>C NMR at 176 MHz), and a Bruker Avance III HD 850 (<sup>1</sup>H NMR at 850 MHz, <sup>13</sup>C NMR at 214 MHz). Chemical shifts for protons are reported in parts per million downfield from tetramethylsilane and are referenced to residual protium in the solvent (<sup>1</sup>H NMR: CHCl<sub>3</sub> at 7.26 ppm, MeOD at 3.31 ppm, acetone-*d*<sub>6</sub> at 2.05 ppm and DMSO- *d*<sub>6</sub> at 2.50 ppm). Chemical shifts for carbon signals are reported in parts per million downfield from tetramethylsilane and are referenced to the carbon resonances of the solvent peak (<sup>13</sup>C NMR: CDCl<sub>3</sub> at 77.16 ppm, MeOD at 49.00 ppm, acetone-*d*<sub>6</sub> at 29.84 ppm (CD<sub>3</sub>) and at 206.46 (C=O), and DMSO- *d*<sub>6</sub> at 39.52 ppm). Chemical shifts for fluorine signals are reported in parts per million downfield from tetramethylsilane and are referenced to hexafluorobenzene, which was added as an internal standard. Solvent-dependent <sup>19</sup>F values of hexafluorobenzene are obtained from Togni *et al.* (48) [<sup>19</sup>F NMR: C<sub>6</sub>F<sub>6</sub>(CDCl<sub>3</sub>) at -161.64 ppm, C<sub>6</sub>F<sub>6</sub>(MeOD) at -165.37 ppm, C<sub>6</sub>F<sub>6</sub>(acetone-*d*<sub>6</sub>) at -164.67 ppm, C<sub>6</sub>F<sub>6</sub>(DMSO- *d*<sub>6</sub>) at -162.45 ppm]. <sup>1</sup>H, <sup>13</sup>C and <sup>19</sup>F NMR data are reported as follows: chemical shift, multiplicity (s = singlet, d = doublet, t = triplet, q = quartet, hept = heptet, dd = doublet of doublets, ddd = doublet of doublet of doublets, m = multiplet, bs = broad singlet, app = apparent), coupling constants (Hz), and integration. Attenuated total reflectance FTIR spectra were recorded on a Bruker Alpha FTIR Spectrometer with the Plantinum ATR attachment. Spectra were averaged over 24 scans with a spectral resolution of 4 cm<sup>-1</sup>. Data processing was performed using Bruker's OPUS spectroscopy software. High Resolution Mass Spectra (HRMS) were obtained via direct infusion using a Thermo LTQ FT mass spectrometer with positive mode electrospray ionization, via gas chromatography using an Exactive GC gas chromatographic system in positive mode chemical ionization, equipped with a Trace 1300 SSL injector and TriPlus RSH autosampler, or via liquid chromatography using Waters Acquity H-class liquid chromatograph system coupled to a Thermo LTQ FT mass spectrometer with positive mode electrospray ionization. The instrumental control, data acquisition and data processing for HRMS were performed with Thermo's Xcalibur and TraceFinder software packages. Thin layer chromatography (TLC) was performed on SiliaPlate 250 μm thick silica gel plates provided by Silicycle or on Alumina N 200 μm thick aluminium oxide plates (polyester backed) provided by Sorbtech. Visualization was accomplished with short wave UV light (254 nm), or development with iodine, ninhydrin solution, cerium ammonium molybdate or potassium permanganate solution followed by heating. Column chromatography was performed using SiliaFlash P60 silica gel (40-63 μm) purchased from Silicycle or using Acros Organics aluminium oxide (basic, Brockmann I, 50-200 μm, 60 Å). Reverse-phase flash

liquid chromatography was performed using a Biotage® Isolera One instrument with a Biotage® SNAP Ultra C18 cartridge (30 g). Unless noted all reactions were run under an atmosphere of nitrogen in flame-dried glassware with magnetic stirring. Irradiation of photochemical reactions was carried out using a PAR38 Royal Blue aquarium LED lamp (Model #6851) fabricated with high-power Cree XR-E LEDs as purchased from Ecoxotic ([www.ecoxotic.com](http://www.ecoxotic.com)) with standard borosilicate glass vials purchased from Fischer Scientific. For all photolyses, reactions were stirred using a PTFE coated magnetic stir bar on a magnetic stir plate. GC quantitation experiments were performed on an Agilent 6850 series instrument equipped with a split- mode capillary injection system and Agilent 5973 network mass spec detector (MSD). Yield refers to isolated yield of analytically pure material unless otherwise noted. GC yields were determined using 3-bromotoluene as an internal standard. All other reagents were obtained from commercial sources and used without further purification unless otherwise noted.

### 1.3 Photoreactor Configuration (LEDs)

Reactions were irradiated using a simple photoreactor consisting of two Par38 Royal Blue Aquarium LED lamps (Model #6851) is shown in which one reaction (2 dram vial) is irradiated with a foil barrier preventing irradiation by two lamps. In order to ensure that the reactions are run near room temperature, a simple cooling fan was installed perpendicular to the reactor to aid in heat dissipation (generated from both nonradiative decay pathways of the excited state catalysts and the heat generated from high power LEDs). The vial was positioned on a stir plate approximately 3-4 cm from a Par38 LED lamp supplying blue light ( $\lambda = 440\text{-}460\text{ nm}$ ). An equilibrium temperature of 33 °C was measured with a standard alcohol thermometer. While a number of other blue LED sources are effective, we have found that LED emitters with high luminous flux and narrow viewing angle give the best results. Reaction optimizations were performed on a 16-well proprietary photoreactor with the following parameters.

#### Basic Parameters:

Input: AC 100 – 240 V 50/60 Hz

Output: 12 W

Light-emitting angle: 45°

Pulse current: 700 mA

Lumens (LM): 130 -140 LM

Wavelength: 465-470 nm; Max wavelength: 467.5 nm

Working temperature: -10 - +60 °C

LED lifetime : 100000 hours

Size: 20cm\*20cm\*20cm

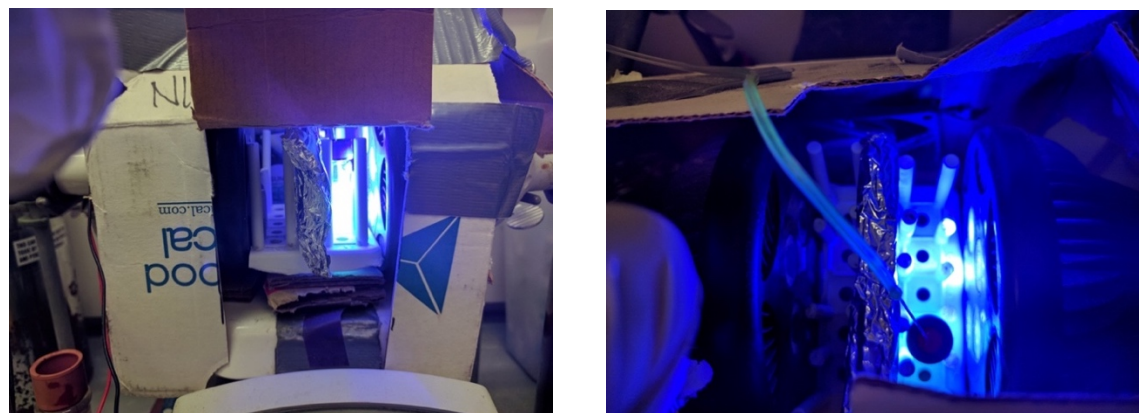

**Fig. S1.** Side-on (top left) and top-down (top right) views of the simple photoreactor.

#### 1.4. Radiochemistry

All chemicals are analytical grade and used without further purification. Ultrapure water was obtained from a Millipore MilliQ Gradient A10 system. Pre-conditioned Sep-PAK<sup>®</sup> light QMA cartridge were purchased from ABX Corporation, and were flushed with 10 ml of water before use. The 450 nm OEM blue diode laser used (OEM-SD-450, 450nm, the power rating is 3.5W after fiber coupling). for the photochemical experiments was purchased from Changchun New Industries Optoelectronics Tech. Co., Ltd. A schematic of the reaction set-up is shown in section 5.3 (Fig. S3). Glass backed thin layer chromatography (TLC) plates coated with silica gel 60F254 were used for radio-TLC analysis and were purchased from EMD-Millipore.

[<sup>18</sup>F]Fluoride was produced via the <sup>18</sup>O(p,n)<sup>18</sup>F reaction by proton irradiation (40μA, 2-5min) of an [<sup>18</sup>O]H<sub>2</sub>O containing target in a GE PETTrace cyclotron. The [<sup>18</sup>F]fluoride (ca. 1.2-2.2Ci) was delivered to the synthesis module in a bolus of [<sup>18</sup>O]H<sub>2</sub>O by stream of argon. The aqueous solution of [<sup>18</sup>F]fluoride was passed through a QMA cartridge (water preconditioning) to trap [<sup>18</sup>F]fluoride before elution into the reactor vessel with a aqueous solution of 20% w/w tetrabutylammonium bicarbonate (TBAB). This solution was azeotropically dried by heating the reaction vessel to 100 °C and drawing vacuum (ca. 1 kPa) for 5 min, followed by simultaneous vacuum draw and nitrogen stream for a further 6 minutes. The dried [<sup>18</sup>F]TBAF was cooled to 50 °C before addition of anhydrous MeCN. The mixture was transferred out of the reactor under N<sub>2</sub> pressure into a sterile vial to yield a solution of [<sup>18</sup>F]TBAF (1.1-1.8 Ci, average = 1.5 Ci) in MeCN. 10-100 μL aliquots of this solution were then used for manual methodology experiments.

Radio-TLC analysis was performed using a Bioscan AR 2000 Radio-TLC scanner (Ekert and Ziegler) <sup>18</sup>F activity was counted using a CRC-25 PET detector from Capintec. Analytical reversed-phase high-performance liquid chromatography (HPLC) was accomplished on a SHIMADZU chromatography system (Model CBM-20A) and analyzed using LabSolutions software. The λ absorbance detector and the model 2200 scaler ratemeter radiation detector were added to the HPLC system. HPLC conditions are listed accordingly for each experiment (Section 5).

All radiochemical yields (RCY) quoted are decay corrected and are reported as isolated RCY other than Section 5.4. An aliquot of the reaction mixture (typically 400-800μCi) was taken for radio-HPLC analysis. The activity injected into HPLC was measured (this activity was denoted by α) and the time of injection was recorded. The fraction corresponding to radiolabeled product was collected and the activity was measured (this activity was denoted by β). The decay-corrected RCY was calculated by dividing the decay-corrected β by α. All RCY were calculated with respect to the starting <sup>18</sup>F activity of the eluted fluoride. The identities of the <sup>18</sup>F-labeled compounds were confirmed by comparison to authentic <sup>19</sup>F standards. The following fluorination standards were obtained from commercial vendors and used as received: 4-fluorophenoxybenzene (**2**), 4-fluorobiphenyl (**3**), 1-fluoronaphthalene (**4**), 2-bromo-4-fluoroanisole (**5**), 2-chloro-4-fluoroanisole (**6**), methyl 5-fluoro-2-methoxybenzoate (**8**), 1-(5-fluoro-2-methoxyphenyl)ethenone (**9**), 5-fluoro-2-methoxybenzonitrile (**10**), 5-fluoro-2-methoxybenzaldehyde (**11**), 3-fluoro-4-methoxybenzaldehyde (**15**), 1-(3-fluoro-4-methoxyphenyl)ethenone (**16**), methyl 3-fluoro-4-methoxybenzoate (**18**), 1-(4-fluoro-3-methoxyphenyl)ethenone (**20**, [**4-F**]) and 2-fluoromesitylene (**25**). The preparation of aromatic fluorinated standards (**7**, **12**, **13**, **14**, **17**, **19**, **20** [**2-F**], **21-24**, **26-42**) are found in section 3.3.

## 2. Optimization Studies for Arene C-H <sup>19</sup>F-fluorination

**Table S1:** Selected optimization table for photoredox-catalyzed C-H fluorination

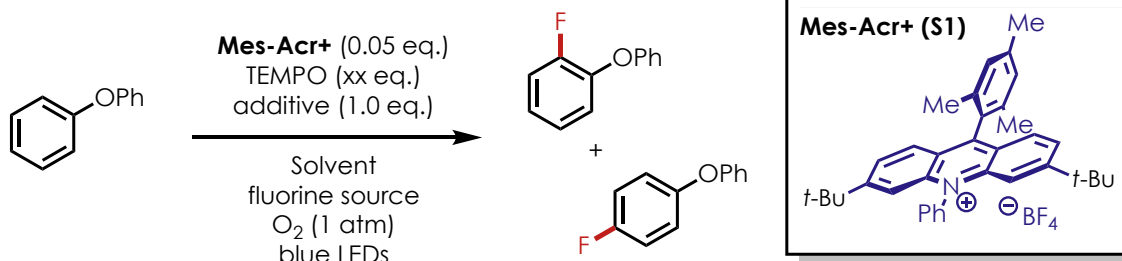

| entry | additive                                    | TEMPO eq. | fluoride source  | solvent [M] <sup>†</sup> | total yield <sup>*,‡</sup> |
|-------|---------------------------------------------|-----------|------------------|--------------------------|----------------------------|
| 1     | NBu <sub>4</sub> HSO <sub>4</sub>           | 0.20      | sat. KF solution | DCE[0.10]                | 6%                         |
| 2     | NBu <sub>4</sub> Cl                         | 0.20      | sat. KF solution | DCE [0.10]               | 4%                         |
| 3     | NBu <sub>4</sub> BF <sub>4</sub>            | 0.20      | sat. KF solution | DCE [0.10]               | 3%                         |
| 4     | NBu <sub>4</sub> PF <sub>6</sub>            | 0.20      | sat. KF solution | DCE [0.10]               | 0%                         |
| 5     | none                                        | 0.20      | sat. KF solution | DCE [0.10]               | <1%                        |
| 6     | NBu <sub>4</sub> HSO <sub>4</sub>           | 0.20      | sat. KF solution | MeCN [0.10]              | 2%                         |
| 7     | NBu <sub>4</sub> HSO <sub>4</sub>           | 0.20      | sat. KF solution | TFT [0.10]               | 0%                         |
| 8     | NBu <sub>4</sub> HSO <sub>4</sub>           | 0.50      | KF (10 eq.)      | DCE [0.10]               | 9%                         |
| 9     | NBu <sub>4</sub> HSO <sub>4</sub>           | 0.50      | CsF (10 eq.)     | DCE [0.10]               | 12%                        |
| 10    | NBu <sub>4</sub> HSO <sub>4</sub> (0.50 eq) | 0.50      | CsF (10 eq.)     | DCE [0.10]               | 17%                        |

Reactions were performed using diphenyl ether (0.50 mmol), catalyst **S1** (0.05 eq.) under O<sub>2</sub>

\*Yields determined by gas chromatography analysis using 3-bromotoluene as the internal standard

<sup>†</sup> DCE: 1,2 Dichloroethane; TFT: α, α, α Trifluorotoluene; MeCN: Acetonitrile

<sup>‡</sup> Greater than 10:1 ratio of 4-fluoro product typically detected; **13:1 ratio detected for entry 10**

**Table S1.** Optimization of photoredox-catalyzed C-H fluorination for diphenyl ether

### 3. Experimental Procedures: Catalyst and Substrate Synthesis

#### 3.1 Preparation of Acridinium Photocatalysts

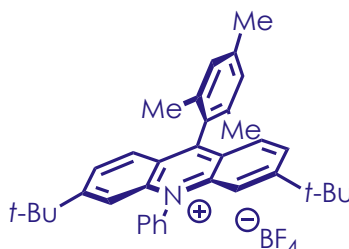

**9-Mesityl-3,6-di-*tert*-butyl-10-phenylacridinium tetrafluoroborate (S1)** The title compound was prepared according to a published procedure; spectra data are in agreement with literature values. (23)

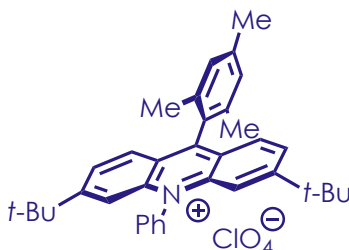

**9-Mesityl-3,6-di-*tert*-butyl-10-phenylacridinium perchlorate (1)** To a dry, clean round-bottomed flask was added 9-mesityl-3,6-di-*tert*-butyl-10-phenylacridinium tetrafluoroborate (150 mg, 0.262 mmol, 1.0 eq.), which was dissolved in 10 mL of dry acetone. Then an excess of sodium perchlorate (approximately 10-15 eq.) was added to the solution and the reaction was stirred for 2 h. After 2 h. the reaction was diluted with DCM (40 mL) and a formation of a precipitate was observed. This precipitate was dissolved in deionized H<sub>2</sub>O (40 mL) and the two layers were separated. The aqueous layer was extracted with 20 mL DCM and the organic layers were combined and washed with brine. The organic layer was then dried over Na<sub>2</sub>SO<sub>4</sub> and concentrated. The resulting product (yellow-orange amorphous solid) was then resuspended in dry diethyl ether and sonicated to yield a bright yellow solid which was collected by vacuum filtration (150 mg, 98% yield).

**<sup>1</sup>H NMR (600 MHz, CDCl<sub>3</sub>)**  $\delta$  7.95 (t,  $J$  = 7.6 Hz, 2H), 7.88 (t,  $J$  = 7.5 Hz, 1H), 7.83 – 7.74 (m, 6H), 7.41 (s, 2H), 7.16 (s, 2H), 2.48 (s, 3H), 1.88 (s, 6H), 1.29 (s, 18H).

**<sup>13</sup>C NMR (176 MHz, CDCl<sub>3</sub>)**  $\delta$  163.55, 162.33, 142.35, 140.22, 137.13, 136.42, 131.84, 131.63, 129.54, 129.04, 128.41, 128.33, 127.53, 124.25, 115.30, 36.79, 30.37, 21.43, 20.43.

**IR (thin film):** 2956.5784, 2912.2719, 2871.2659, 1611.6495, 1575.68, 1455.0618, 1440.7732, 1098.8189, 1079.2542, 1059.5842, 1030.7769, 849.4037, 620.8047

**HRMS (ESI):** Calculated for C<sub>36</sub>H<sub>40</sub>N (M+)<sup>+</sup>: 486.31553; found: 486.31408.

### 3.2 Preparation of Arene Substrates (S2-S27)

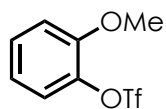

**2-Methoxyphenyl trifluoromethanesulfonate (S2)** The title compound was prepared according to a published procedure; spectra data are in agreement with literature values. (49)

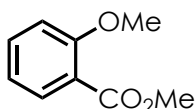

**Methyl 2-methoxybenzoate (S3)** The title compound was prepared according to a published procedure; spectra data are in agreement with literature values. (50)

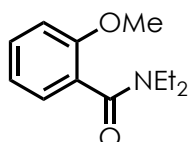

**N,N-diethyl-2-methoxybenzamide (S4)** The title compound was prepared according to a published procedure; spectra data are in agreement with literature values. (51)

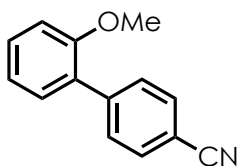

**2'-Methoxy-[1,1'-biphenyl]-4-carbonitrile (S5)** The title compound was prepared according to a published procedure (52); spectra data are in agreement with literature values. (53)

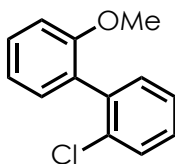

**2-Chloro-2'-methoxy-1,1'-biphenyl (S6)** The title compound was prepared according to a published procedure; spectra data are in agreement with literature values. (52)

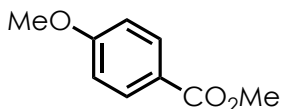

**Methyl 4-methoxybenzoate (S7)** The title compound was prepared according to a published procedure; spectra data are in agreement with literature values. (54)

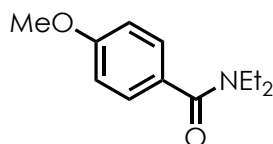

***N,N*-diethyl-4-methoxybenzamide (S8)** The title compound was prepared according to a published procedure; spectra data are in agreement with literature values. (55)

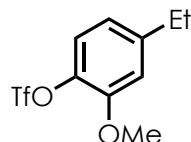

**4-Ethyl-2-methoxyphenyl trifluoromethanesulfonate (S9)** To a dry, clean round bottomed flask equipped with a stir bar was added 4-ethyl-2-methoxyphenol (457 mg, 3.00 mmol, 1.0 eq.) and the solid was dissolved in 30 mL of DCM under N<sub>2</sub>. The solution was cooled to 0 °C before pyridine (0.48 mL, 6.00 mmol, 2.0 eq.) was added to the solution. Trifluoromethanesulfonic anhydride (0.61 mL, 3.60 mmol, 1.2 eq.) was then added to the reaction dropwise and the solution was stirred for 15 minutes before being warmed to room temperature. The reaction was then run for 2 h. before being quenched with DI water. The reaction was then diluted with DCM before the layers were separated. The aqueous layer was extracted once with DCM (10 mL) and the organic layers were combined, washed sequentially with 10 mL of dilute HCl (2.0 M) and brine, dried over Na<sub>2</sub>SO<sub>4</sub> and concentrated. The crude product was purified via flash chromatography (10% EtOAc) to yield 4-ethyl-2-methoxyphenyl trifluoromethanesulfonate as a yellow oil (810 mg, 95%).

**<sup>1</sup>H NMR (600 MHz, CDCl<sub>3</sub>)** δ 7.12 (d, *J* = 8.3 Hz, 1H), 6.86 (d, *J* = 2.1 Hz, 1H), 6.79 (dt, *J* = 8.3, 1.3 Hz, 1H), 3.90 (s, 3H), 2.66 (q, *J* = 7.6 Hz, 2H), 1.26 (t, *J* = 7.7 Hz, 3H).

**<sup>13</sup>C NMR (151 MHz, CDCl<sub>3</sub>)** δ 151.21, 146.11, 136.92, 122.16, 120.15, 118.91 (q, *J* = 320.5 Hz), 112.84, 56.16, 28.98, 15.46.

**<sup>19</sup>F NMR (376 MHz, CDCl<sub>3</sub>)** δ -73.75.

**HRMS (ESI):** Calculated for C<sub>10</sub>H<sub>11</sub>F<sub>3</sub>O<sub>4</sub>S (M+H)<sup>+</sup>: 285.03989; found: 285.04028.

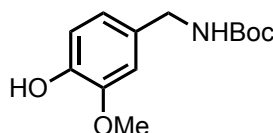

***Tert*-butyl (4-hydroxy-3-methoxybenzyl)carbamate (S10)** was prepared according to a published procedure; spectra data are in agreement with literature values. (56)

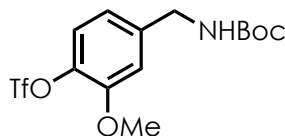

**4-(((*Tert*-butoxycarbonyl)amino)methyl)-2-methoxyphenyl trifluoromethanesulfonate (S11)** *Tert*-butyl (4-hydroxy-3-methoxybenzyl)carbamate (0.834 g, 3.29 mmol, 1.0 eq.) was added to a dry, clean round bottomed flask equipped with a stir bar and dissolved in 30 mL of DCM under N<sub>2</sub>. The solution was cooled to 0 °C before pyridine (0.53 mL, 6.59 mmol, 2.0 eq.) was added to the solution. Trifluoromethanesulfonic anhydride (0.67 mL, 4.00 mmol, 1.2 eq.) was then added to the reaction dropwise and the solution was stirred for 15 minutes before being warmed to room temperature. The reaction was then run for 2 h. before being quenched with DI water. The reaction

was then diluted with DCM before the layers were separated. The aqueous layer was extracted once with DCM (10 mL) and the organic layers were combined, washed sequentially with 10 mL of dilute HCl (2.0 M) and brine, dried over Na<sub>2</sub>SO<sub>4</sub> and concentrated. The crude product was purified via flash chromatography (10 to 20% EtOAc) to yield 4-(((*Tert*-butoxycarbonyl)amino)-methyl)-2-methoxyphenyl trifluoromethanesulfonate as a white solid (1.15 g, 91%).

**<sup>1</sup>H NMR (600 MHz, CDCl<sub>3</sub>)** δ 7.15 (d, *J* = 8.3 Hz, 1H), 6.97 (s, 1H), 6.86 (dd, *J* = 8.3, 2.0 Hz, 1H), 4.97 (s, 1H), 4.30 (d, *J* = 6.3 Hz, 2H), 3.89 (s, 3H), 1.46 (s, 9H).

**<sup>13</sup>C NMR (151 MHz, CDCl<sub>3</sub>)** δ 156.06, 151.56, 141.03, 137.92, 122.53, 119.56, 118.85 (q, *J* = 320.5 Hz), 112.28, 80.03, 56.27, 44.34, 28.48.

**<sup>19</sup>F NMR (376 MHz, CDCl<sub>3</sub>)** δ -73.78.

**HRMS (ESI):** Calculated for C<sub>14</sub>H<sub>18</sub>F<sub>3</sub>NO<sub>6</sub>S (M+Na)<sup>+</sup>: 408.06993; found: 408.06909.

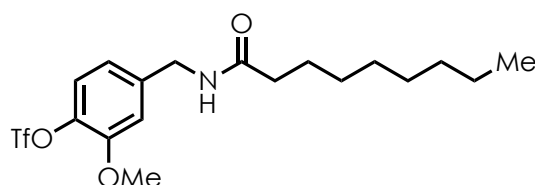

**2-Methoxy-4-((nonanamidomethyl)phenyl) trifluoromethanesulfonate (S12)** To a dry, clean round bottomed flask equipped with a stir bar was added nonivamide (354.0 mg, 1.21 mmol, 1.0 eq.) and the solid was dissolved in 12 mL of DCM under N<sub>2</sub>. The solution was cooled to 0 °C before triethylamine (0.18 mL, 1.33 mmol, 1.1 eq.) and 1,1,1-trifluoro-N-phenyl-N-((trifluoromethyl)sulfonyl)methanesulfonamide (440 mg, 1.23 mmol, 1.02 eq.) were sequentially added. The reaction was stirred at 0 °C for 15 minutes before being warmed to room temperature. The reaction was then run for 4 h. before being quenched with DI water. The reaction was then diluted with DCM before the layers were separated. The aqueous layer was extracted once with DCM (10 mL) and the organic layers were combined, washed sequentially with 10 mL of dilute HCl (2.0 M) and brine, dried over Na<sub>2</sub>SO<sub>4</sub> and concentrated. The crude product was purified via flash chromatography (40% EtOAc) to yield 2-methoxy-4-((nonanamidomethyl)phenyl) trifluoromethanesulfonate as an off-white solid (439 mg, 86%).

**<sup>1</sup>H NMR (600 MHz, CDCl<sub>3</sub>)** δ 7.15 (d, *J* = 8.3 Hz, 1H), 6.96 (d, *J* = 2.0 Hz, 1H), 6.86 (dd, *J* = 8.3, 2.0 Hz, 1H), 5.81 (s, 1H), 4.43 (d, *J* = 6.0 Hz, 2H), 3.89 (s, 3H), 2.26 – 2.16 (m, 2H), 1.66 (p, *J* = 7.6 Hz, 2H), 1.36 – 1.18 (m, 10H), 0.87 (t, *J* = 7.0 Hz, 3H).

**<sup>13</sup>C NMR (151 MHz, CDCl<sub>3</sub>)** δ 173.40, 151.61, 140.46, 138.01, 122.59, 119.93, 118.84 (q, *J* = 320.4 Hz), 112.72, 56.30, 43.18, 36.86, 31.93, 29.44, 29.43, 29.28, 25.88, 22.75, 14.19.

**<sup>19</sup>F NMR (376 MHz, CDCl<sub>3</sub>)** δ -73.77.

**HRMS (ESI):** Calculated for C<sub>18</sub>H<sub>26</sub>F<sub>3</sub>NO<sub>5</sub>S (M+Na)<sup>+</sup>: 448.13762; found: 448.13638.

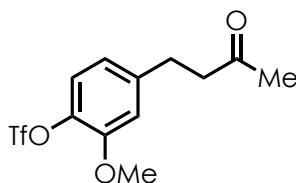

**2-methoxy-4-((3-oxobutyl)phenyl) trifluoromethanesulfonate (S13) (NT-06-180)** To a dry, clean round bottomed flask equipped with a stir bar was added zingerone (971.0 mg, 5.00 mmol, 1.0 eq.) and the solid was dissolved in 50 mL of DCM under N<sub>2</sub>. The solution was cooled to 0 °C before

triethylamine (0.76 mL, 5.50 mmol, 1.1 eq.) and 1,1,1-trifluoro-N-phenyl-N-((trifluoromethyl)sulfonyl)methanesulfonamide (440 mg, 1.23 mmol, 1.02 eq.) were sequentially added. The reaction was stirred at 0 °C for 15 minutes before being warmed to room temperature. The reaction was then run for 4 h. before being quenched with DI water. The reaction was then diluted with DCM before the layers were separated. The aqueous layer was extracted once with DCM (10 mL) and the organic layers were combined, washed sequentially with 20 mL of dilute HCl (2.0 M) and brine, dried over Na<sub>2</sub>SO<sub>4</sub> and concentrated. The crude product was purified via flash chromatography (40% to 50% EtOAc) to yield 2-methoxy-4-(3-oxobutyl)phenyl trifluoromethanesulfonate as a cream-colored liquid (1.39 g, 85%).

**<sup>1</sup>H NMR (600 MHz, CDCl<sub>3</sub>)** δ 7.06 (d, *J* = 8.3 Hz, 1H), 6.85 (d, *J* = 2.1 Hz, 1H), 6.74 (dd, *J* = 8.3, 2.0 Hz, 1H), 3.83 (s, 3H), 2.85 (t, *J* = 7.5 Hz, 2H), 2.74 (t, *J* = 7.5 Hz, 2H), 2.10 (s, 3H).

**<sup>13</sup>C NMR (151 MHz, CDCl<sub>3</sub>)** δ 207.25, 151.14, 143.08, 137.04, 122.18, 120.52, 118.75 (q, *J* = 320.3 Hz), 113.40, 56.04, 44.63, 29.93, 29.42.

**<sup>19</sup>F NMR (565 MHz, CDCl<sub>3</sub>)** δ -73.67.

**HRMS (ESI):** Calculated for C<sub>12</sub>H<sub>13</sub>F<sub>3</sub>O<sub>5</sub>S (M+H)<sup>+</sup>: 327.05203; found: 327.05085

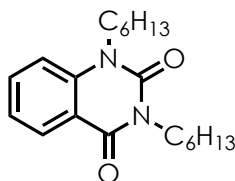

**1,3-dihexylquinazoline-2,4(1*H*,3*H*)-dione (S14)** The title compound was prepared according to a published procedure; spectra data are in agreement with literature values. (23)

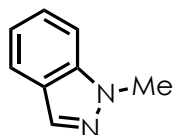

**1-methyl-1*H*-indazole (S15)** The title compound was prepared according to a published procedure; spectra data are in agreement with literature values. (23)

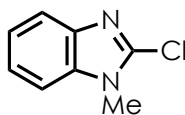

**2-chloro-1-methyl-1*H*-benzo[*d*]imidazole (S16)** The title compound was prepared according to a published procedure; spectra data are in agreement with literature values. (57)

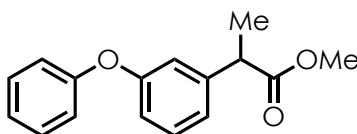

**Methyl 2-(3-phenoxyphenyl)propanoate (S17)** The title compound was prepared according to a published procedure; spectral data are in agreement with literature values. (58)

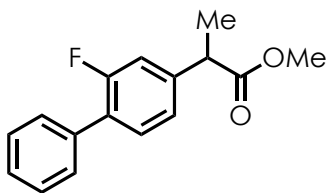

**Methyl 2-(2-fluoro-[1,1'-biphenyl]-4-yl)propanoate (S18)** The title compound was prepared according to a published procedure; spectral data are in agreement with literature values. (59)

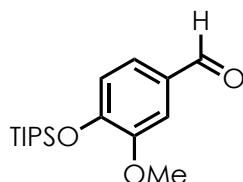

**3-Methoxy-4-((triisopropylsilyl)oxy)benzaldehyde (S19)** The title compound was prepared according to a published procedure; spectra data are in agreement with literature values. (60)

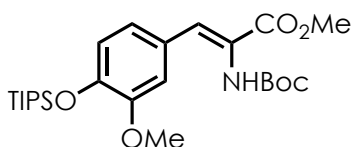

**Methyl (Z)-2-((tert-butoxycarbonyl)amino)-3-(3-methoxy-4-((triisopropylsilyl)oxy)phenyl)acrylate (S20)** Methyl 2-((tert-butoxycarbonyl)amino)-2-(dimethoxyphosphoryl)acetate (2.58 g, 8.67 mmol, 1.2 eq.) was added to a flame dried round bottomed flask equipped with a stir bar and dissolved in 10 mL of dry DCM under N<sub>2</sub>. Then 1,8-diazabicyclo[5.4.0]undec-7-ene (1.09 mL, 7.23 mmol, 1.0 eq.) was added via syringe and the mixture was stirred at room temperature for 15 minutes. While the phosphonate ester solution was stirring, a solution of 3-methoxy-4-((triisopropylsilyl)oxy)benzaldehyde (2.23 g, 7.23 mmol, 1.0 eq.) in 10 mL DCM was prepared. This benzaldehyde solution was added to the phosphonate ester solution dropwise at room temperature. Reaction conversion was monitored via TLC (reaction takes approximately 4 h.) and at the end of the reaction, the solution was concentrated and loaded onto Celite. The crude reaction mixture was then purified via flash chromatography (10 to 20 % EtOAc) to yield methyl 2-((tert-butoxycarbonyl)-amino)-3-(3-methoxy-4-((triisopropylsilyl)oxy)phenyl)propanoate as a white solid (2.00 g, 58%)

**<sup>1</sup>H NMR (600 MHz, CDCl<sub>3</sub>)** δ 7.20 (bs, 1H), 7.14 (s, 1H), 7.02 (d, *J* = 7.9 Hz, 1H), 6.80 (d, *J* = 8.2 Hz, 1H), 6.25 (bs, 1H), 3.77 (s, 3H), 3.75 (s, 3H), 1.36 (bs, 9H), 1.25 – 1.16 (m, 3H), 1.05 (d, *J* = 7.6 Hz, 18H).

**<sup>13</sup>C NMR (151 MHz, CDCl<sub>3</sub>)** δ 166.31, 153.28, 150.58, 146.97, 132.02, 127.36, 123.85, 122.58, 120.21, 113.29, 80.56, 55.21, 52.30, 28.09, 17.83, 12.86.

**HRMS (ESI):** Calculated for C<sub>25</sub>H<sub>41</sub>NO<sub>6</sub>Si (M+H)<sup>+</sup>: 480.27760; found: 480.27620.

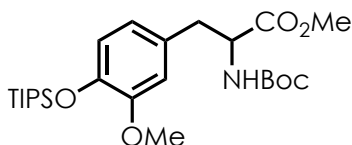

**Methyl (Z)-2-((tert-butoxycarbonyl)amino)-3-(3-methoxy-4-((triisopropylsilyl)oxy)phenyl)acrylate (S21)** To a dry, clean round bottomed flask equipped with

a stir bar was added methyl (Z)-2-((*tert*-butoxycarbonyl)amino)-3-(3-methoxy-4-((triisopropylsilyl)oxy)phenyl)acrylate (2.30 g, 4.79 mmol, 1.0 eq.), which was then dissolved in 60 mL of a THF:EtOH (2:1) solution. 10% Palladium on carbon (153.0 mg, 1.44 mmol, 0.30 eq.) was added to the solution and the reaction was placed under N<sub>2</sub>. The solution was purged and backfilled with H<sub>2</sub> before being placed under a H<sub>2</sub> atmosphere (1 atm) overnight (reaction is typically done in about 2-3 hours). Once the reaction was complete, the solution was run through a Celite plug and concentrated. The crude mixture was then purified by flash chromatography (10% EtOAc:Hex) to yield methyl 2-((*tert*-butoxycarbonyl)amino)-3-(3-methoxy-4-((triisopropylsilyl)oxy)phenyl)propanoate as a white solid (2.26 g, 98%).

**<sup>1</sup>H NMR (600 MHz, CDCl<sub>3</sub>)** δ 6.78 (d, *J* = 8.0 Hz, 1H), 6.59 (d, *J* = 2.1 Hz, 1H), 6.54 (dd, *J* = 8.1, 2.1 Hz, 1H), 4.94 (d, *J* = 7.8 Hz, 1H) + rotamer at 4.67 (bs), 4.53 (q, *J* = 6.7 Hz, 1H) + rotamer at 4.34 (bs), 3.77 (s, 3H), 3.67 (s, 3H), 3.03 – 2.96 (m, 2H), 1.42 (s, 9H), 1.27 – 1.15 (m, 3H), 1.08 (d, *J* = 7.4 Hz, 18H).

**<sup>13</sup>C NMR (151 MHz, CDCl<sub>3</sub>)** δ 172.66, 155.22, 150.94, 144.70, 129.11, 121.50, 120.53, 113.20, 80.00, 55.55, 54.69, 52.26, 38.21, 28.46, 18.03, 12.98.

**HRMS (ESI):** Calculated for C<sub>25</sub>H<sub>43</sub>NO<sub>6</sub>Si (M+Na)<sup>+</sup>: 504.27522; found: 504.27398.

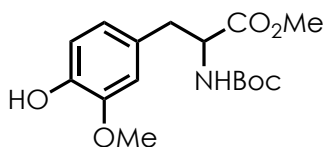

**Methyl 2-((*tert*-butoxycarbonyl)amino)-3-(4-hydroxy-3-methoxyphenyl)propanoate (S22)**

Methyl 2-((*tert*-butoxycarbonyl)amino)-3-(3-methoxy-4-((triisopropylsilyl)oxy)phenyl)propanoate (2.00g, 4.15 mmol, 1.0 eq.) was added to a clean, dry round bottomed flask equipped with a stir bar and the solid was dissolved in 35 mL of THF under N<sub>2</sub>. The solution was then cooled to 0 °C before a solution of tetrabutylammonium fluoride (1.0 M in THF, 4.6 mL, 4.57 mmol, 1.1 eq.) was added dropwise to the reaction mixture. The reaction was then warmed to room temperature and allowed to stir for 2 h. At the end of the reaction, the reaction was quenched with 15 mL NH<sub>4</sub>Cl solution before being diluted with EtOAc. The layers were separated and the aqueous layer was extracted twice with 10 mL EtOAc. The organic layers were combined, dried over Na<sub>2</sub>SO<sub>4</sub>, concentrated and purified by flash chromatography (40-50% EtOAc:Hex) to yield methyl 2-((*tert*-butoxycarbonyl)amino)-3-(4-hydroxy-3-methoxyphenyl)propanoate as a white solid (1.25 g, 93%).

**<sup>1</sup>H NMR (600 MHz, CDCl<sub>3</sub>)** δ 6.82 (d, *J* = 8.0 Hz, 1H), 6.65 – 6.56 (m, 2H), 5.57 (s, 1H), 4.97 (d, *J* = 8.3 Hz, 1H) + rotamer at 4.71 (bs), 4.54 (q, *J* = 6.6 Hz, 1H) + rotamer at 4.34 (bs), 3.86 (s, 3H), 3.71 (s, 3H), 3.01 (qd, *J* = 14.0, 6.0 Hz, 2H) + rotamer at 2.88 (bs), 1.42 (s, 9H).

**<sup>13</sup>C NMR (151 MHz, CDCl<sub>3</sub>)** δ 172.59, 155.23, 146.61, 144.83, 127.86, 122.22, 114.51, 111.77, 80.06, 55.97, 54.69, 52.33, 38.13, 28.45.

**HRMS (ESI):** Calculated for C<sub>16</sub>H<sub>23</sub>NO<sub>6</sub> (M+Na)<sup>+</sup>: 348.14179; found: 348.14087.

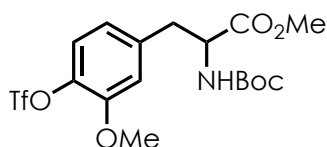

**Methyl 2-((*tert*-butoxycarbonyl)amino)-3-(3-methoxy-4-**

**((trifluoromethyl)sulfonyl)oxy)phenyl)propanoate (S23)** To a dry, clean round bottomed flask equipped with a stir bar was added methyl 2-((*tert*-butoxycarbonyl)amino)-3-(4-hydroxy-3-

methoxyphenyl)propanoate (1.25 g, 3.84 mmol, 1.0 eq.) and the solid was dissolved in 30 mL of DCM under N<sub>2</sub>. The solution was cooled to 0 °C before pyridine (0.62 mL, 7.68 mmol, 2.0 eq.) was added to the solution. Trifluoromethanesulfonic anhydride (0.78 mL, 4.61 mmol, 1.2 eq.) was then added to the reaction dropwise and the solution was stirred for 15 minutes before being warmed to room temperature. The reaction was then run for 2 h. before being quenched with DI water. The reaction was then diluted with DCM before the layers were separated. The aqueous layer was extracted once with DCM (10 mL) and the organic layers were combined, washed sequentially with 10 mL of dilute HCl (2.0 M) and brine, dried over Na<sub>2</sub>SO<sub>4</sub> and concentrated. The crude product was purified via flash chromatography (10% EtOAc) to yield methyl 2-((*tert*-butoxycarbonyl)amino)-3-(3-methoxy-4-(((trifluoromethyl)sulfonyl)oxy)phenyl)-propanoate as a white solid (1.67 g, 95%).

**<sup>1</sup>H NMR (600 MHz, CDCl<sub>3</sub>)** <sup>1</sup>H NMR (600 MHz, CDCl<sub>3</sub>) δ 7.12 (d, *J* = 8.2 Hz, 1H), 6.81 (d, *J* = 2.0 Hz, 1H), 6.73 (d, *J* = 8.4 Hz, 1H), 5.05 (d, *J* = 8.2 Hz, 1H) + rotamer at 4.86 (bs), 4.60 (d, *J* = 7.1 Hz, 1H) + rotamer at 4.38 (bs), 3.88 (s, 3H), 3.70 (s, 3H), 3.13 (dd, *J* = 14.0, 5.9 Hz, 1H), 3.02 (dd, *J* = 14.0, 6.8 Hz, 1H) + rotamer at 2.91 (bs), 1.40 (s, 9H).

**<sup>13</sup>C NMR (151 MHz, CDCl<sub>3</sub>)** δ 172.10, 155.09, 151.31, 138.11, 137.84, 122.40, 121.71, 118.83 (q, *J* = 320.3 Hz), 114.18, 80.29, 56.24, 54.28, 52.47, 38.46, 28.36.

**<sup>19</sup>F NMR (376 MHz, CDCl<sub>3</sub>)** δ -73.76.

**HRMS (ESI):** Calculated for C<sub>17</sub>H<sub>22</sub>F<sub>3</sub>NO<sub>8</sub>S (M+Na)<sup>+</sup>: 480.09106; found: 480.08988.

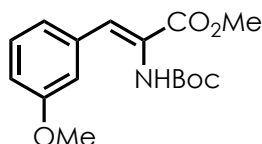

**Methyl (Z)-2-((*tert*-butoxycarbonyl)amino)-3-(3-methoxyphenyl)acrylate (S24)**

Methyl 2-((*tert*-butoxycarbonyl)amino)-2-(dimethoxyphosphoryl)acetate (2.500 g, 8.40 mmol, 1.2 eq.) was added to a flame dried round bottomed flask equipped with a stir bar and dissolved in 15 mL of dry DCM under N<sub>2</sub>. Then 1,8-diazabicyclo[5.4.0]undec-7-ene (1.06 mL, 7.00 mmol, 1.0 eq.) was added via syringe and the mixture was stirred at room temperature for 15 minutes. While the phosphonate ester solution was stirring, a solution of 2-methoxybenzaldehyde (0.9530 g, 7.00 mmol, 1.0 eq.) in 15 mL DCM was prepared. This benzaldehyde solution was added to the phosphonate ester solution dropwise at room temperature. Reaction conversion was monitored via TLC (reaction takes approximately 4 h.) and at the end of the reaction, the solution was concentrated and loaded onto Celite. The crude reaction mixture was then purified via flash chromatography (20 to 30% EtOAc) to yield methyl (Z)-2-((*tert*-butoxycarbonyl)amino)-3-(3-methoxyphenyl)acrylate as a white solid (1.84 g, 86%).

**<sup>1</sup>H NMR (600 MHz, CDCl<sub>3</sub>)** δ 7.52 (d, *J* = 7.7 Hz, 1H), 7.34 (bs, 1H), 7.30 (t, *J* = 7.8 Hz, 1H), 6.95 (t, *J* = 7.7 Hz, 1H), 6.92 (d, *J* = 8.3 Hz, 1H), 6.40 (bs, 1H), 3.87 (s, 2H), 3.84 (s, 2H), 1.38 (s, 10H).

**<sup>13</sup>C NMR (151 MHz, CDCl<sub>3</sub>)** δ 166.25, 157.13, 152.87, 130.42, 129.80, 125.70, 123.76, 123.17, 120.65, 111.15, 80.77, 55.77, 52.58, 28.16.

**HRMS (ESI):** Calculated for C<sub>16</sub>H<sub>21</sub>NO<sub>5</sub> (M+Na)<sup>+</sup>: 330.13122; found: 330.13130.

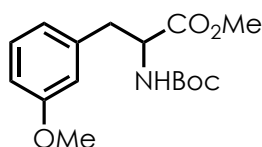

**Methyl 2-((*tert*-butoxycarbonyl)amino)-3-(3-methoxyphenyl)propanoate (S25)**

To a dry, clean round bottomed flask equipped with a stir bar was added methyl (Z)-2-((*tert*-butoxycarbonyl)amino)-3-(3-methoxyphenyl)acrylate (1.84 g, 5.99 mmol, 1.0 eq.), which was then dissolved in 60 mL of a THF:EtOH (2:1) solution. 10% Palladium on carbon (191 mg, 0.30 mmol, 0.10 eq.) was added to the solution and the reaction was placed under N<sub>2</sub>. The solution was purged and backfilled with H<sub>2</sub> before being placed under a H<sub>2</sub> atmosphere (1 atm) overnight (reaction is typically done in about 2-3 hours). Once the reaction was complete, the solution was run through a Celite plug and concentrated. The crude mixture was then purified by flash chromatography (10 to 20% EtOAc:Hex) to yield methyl 2-((*tert*-butoxycarbonyl)amino)-3-(3-methoxyphenyl)propanoate as a white solid (1.75 g, 95%). The spectra data are in agreement with literature values. (61)

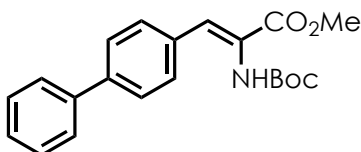

**Methyl (Z)-3-([1,1'-biphenyl]-4-yl)-2-((*tert*-butoxycarbonyl)amino)acrylate (S26)** Methyl 2-((*tert*-butoxycarbonyl)amino)-2-(dimethoxyphosphoryl)acetate (1.783 g, 6.00 mmol, 1.2 eq.) was added to a flame dried round bottomed flask equipped with a stir bar and dissolved in 15 mL of dry DCM under N<sub>2</sub>. Then 1,8-diazabicyclo[5.4.0]undec-7-ene (0.75 mL, 5.00 mmol, 1.0 eq.) was added via syringe and the mixture was stirred at room temperature for 15 minutes. While the phosphonate ester solution was stirring, a solution of biphenyl-4-carboxaldehyde (0.9111 g, 5.00 mmol, 1.0 eq.) in 15 mL DCM was prepared. This benzaldehyde solution was added to the phosphonate ester solution dropwise at room temperature. Reaction conversion was monitored via TLC (reaction takes approximately 4 h.) and at the end of the reaction, the solution was concentrated and loaded onto Celite. The crude reaction mixture was then purified via flash chromatography (20 to 30% EtOAc) to yield methyl (Z)-3-([1,1'-biphenyl]-4-yl)-2-((*tert*-butoxycarbonyl)amino)acrylate as a white solid (1.56 g, 88%). The spectra data are in agreement with literature values. (62)

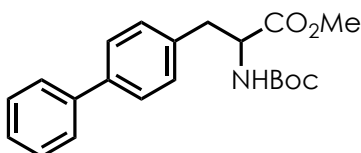

**Methyl 3-([1,1'-biphenyl]-4-yl)-2-((*tert*-butoxycarbonyl)amino)propanoate (S27)** To a dry, clean round bottomed flask equipped with a stir bar was added methyl (Z)-3-([1,1'-biphenyl]-4-yl)-2-((*tert*-butoxycarbonyl)amino)acrylate (1.55 g, 4.39 mmol, 1.0 eq.), which was then dissolved in 20 mL of a THF:EtOH (3:1) solution. 10% Palladium on carbon (93.3 mg, 0.20 mmol, 0.10 eq.) was added to the solution and the reaction was placed under N<sub>2</sub>. The solution was purged and backfilled with H<sub>2</sub> before being placed under a H<sub>2</sub> atmosphere (1 atm) overnight (reaction is typically done in about 2-3 hours). Once the reaction was complete, the solution was run through a Celite plug and concentrated. The crude mixture was then purified by flash chromatography (10 to 20% EtOAc:Hex) to yield methyl 3-([1,1'-biphenyl]-4-yl)-2-((*tert*-butoxycarbonyl)amino)propanoate as a white solid (1.34 g, 97%). The spectra data are in agreement with literature values. (63)

### 3.3 Preparation of aromatic fluorinated standards (7, 12, 13, 14, 17, 19, 20 [2-F], 21-24, 26-42) and corresponding synthetic intermediates (i-1 – i-39)

The following fluorination standards were obtained from commercial vendors and used as received: 4-fluorophenoxybenzene (**2**), 4-fluorobiphenyl (**3**), 1-fluoronaphthalene (**4**), 2-bromo-4-fluoroanisole (**5**), 2-chloro-4-fluoroanisole (**6**), methyl 5-fluoro-2-methoxybenzoate (**8**), 1-(5-fluoro-2-methoxyphenyl)ethenone (**9**), 5-fluoro-2-methoxybenzonitrile (**10**), 5-fluoro-2-methoxybenzaldehyde

(**11**), 3-fluoro-4-methoxybenzaldehyde (**15**), 1-(3-fluoro-4-methoxyphenyl)ethenone (**16**), methyl 3-fluoro-4-methoxybenzoate (**18**), 1-(4-fluoro-3-methoxyphenyl)ethenone (**20**, [**4-F**]) and 2-fluoromesitylene (**25**).

#### General Method A (Synthesis of **26** and **27**)

To a clean, dry 2 dram vial containing a Teflon-coated magnetic stir bar was added 380.0 mg of cesium fluoride (2.50 mmol, 10 eq.) under an inert atmosphere. The vial was then removed from the inert atmosphere and a series of reagents were added: 0.0125 mmol of **S1** (0.05 eq.), tetrabutylammonium hydrogensulfate (2.50 mmol, 1.0 eq.), 2,2,6,6-tetramethyl-1-piperidinyloxy (0.125 mmol, 0.50 eq.), and arene (0.25 mmol, 1.0 eq.). The reagent mixture was then dissolved in solvent (2.5 mL, 0.1 M) and DI water (0.25 mL, 1.0 M) was subsequently added. The vial was then sealed with a Teflon-lined septum screw cap. The septum was pierced with a disposable steel needle connected to a balloon containing positive oxygen pressure. A vent needle was inserted and the reaction medium was sparged for 10 minutes by bubbling oxygen through the mixture. The vent needle was removed and the positive oxygen pressure was maintained. The vial was positioned on a stir plate approximately 3-4 cm from a Par38 LED lamp supplying blue light ( $\lambda = 440\text{-}460\text{ nm}$ ) and irradiated for a designated time. The crude reaction mixture was then concentrated in vacuo and purified by reverse-phase flash liquid chromatography (conditions noted in each entry).

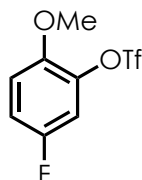

#### 5-Fluoro-2-methoxyphenyl trifluoromethanesulfonate (**7**)

5-fluoro-2-methoxyphenol (0.426 g, 3.00 mmol, 1.0 eq.) was added to a dry, clean round bottomed flask equipped with a stir bar and dissolved in 20 mL of DCM under  $N_2$ . The solution was cooled to 0 °C before pyridine (0.48 mL, 6.00 mmol, 2.0 eq.) was added to the solution. Trifluoromethanesulfonic anhydride (0.60 mL, 3.60 mmol, 1.2 eq.) was then added to the reaction dropwise and the solution was stirred for 15 minutes before being warmed to room temperature. The reaction was then run for 2 h. before being quenched with DI water. The reaction was then diluted with DCM before the layers were separated. The aqueous layer was extracted once with DCM (10 mL) and the organic layers were combined, washed sequentially with 10 mL of dilute HCl (2.0 M) and brine, dried over  $Na_2SO_4$  and concentrated. The crude product was purified via flash chromatography (10 to 20% EtOAc) to yield 5-fluoro-2-methoxyphenyl trifluoromethanesulfonate as a yellow oil (757 mg, 92%).

**$^1H$  NMR (600 MHz,  $CDCl_3$ )**  $\delta$  7.05 (ddd,  $J = 9.1, 7.7, 3.0$  Hz, 1H), 7.02 – 6.97 (m, 2H), 3.88 (s, 3H).

**$^{13}C$  NMR (151 MHz,  $CDCl_3$ )**  $\delta$  155.90 (d,  $J = 243.1$  Hz), 148.30 (d,  $J = 3.2$  Hz), 138.30 (d,  $J = 11.0$  Hz), 118.87 (q,  $J = 320.3$  Hz), 115.68 (d,  $J = 22.4$  Hz), 113.69 (d,  $J = 8.8$  Hz), 110.81 (d,  $J = 26.9$  Hz), 56.68.

**$^{19}F$  NMR (376 MHz,  $CDCl_3$ )**  $\delta$  -73.68, -120.14 (td,  $J = 7.8, 5.1$  Hz).

**HRMS (ESI):** Calculated for  $C_8H_6F_4O_4S$  (M) $^+$ : 273.9923; found: 273.9997.

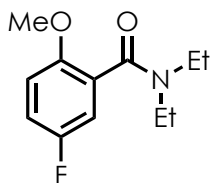

***N,N*-diethyl-5-fluoro-2-methoxybenzamide (12)** To a clean, dry round bottomed flask equipped with a stir bar was added 5-fluoro-2-methoxybenzoic acid (851 mg, 5.00 mmol, 1.0 eq.). The solid was dissolved in PhMe (10 mL) before a catalytic amount of DMF (19.4  $\mu$ L, 0.25 mmol, 0.05 eq.) and thionyl chloride (0.73 mL, 10.0 mmol, 2.0 eq.) was added. The reaction was allowed to stir for 2 h. before being concentrated under reduced pressure to yield the acid chloride as a pale yellow solid. The crude product was then dissolved in 10 mL of DCM under N<sub>2</sub> and cooled to 0 °C. Triethylamine (1.74 mL, 12.5 mmol, 2.5 eq.) and diethylamine (0.67 mL, 6.5 mmol, 1.3 eq.) were sequentially added and the reaction mixture was stirred at 0 °C for 30 min. before warming up to room temperature, where it was stirred further for an additional hour. At the end of the reaction, the mixture was quenched with 10 mL dilute acid (3 N HCl solution) and the layers were separated. The aqueous layer was extracted with 2 x 10 mL of DCM and the organic layers were combined. The organic layers were washed sequentially with saturated NaHCO<sub>3</sub> solution and brine, dried over Na<sub>2</sub>SO<sub>4</sub> and concentrated to yield a yellow liquid. The crude product was then purified by flash chromatography (50% EtOAc:Hex) to yield *N,N*-diethyl-5-fluoro-2-methoxybenzamide as a pale yellow liquid (1.01 g, 89%).

**<sup>1</sup>H NMR (600 MHz, CDCl<sub>3</sub>)**  $\delta$  6.96 (ddd, *J* = 9.1, 8.0, 3.1 Hz, 1H), 6.87 (dd, *J* = 8.0, 3.1 Hz, 1H), 6.80 (dd, *J* = 9.1, 4.1 Hz, 1H), 3.74 (s, 3H), 3.57 – 3.43 (m, 2H), 3.10 (q, *J* = 7.2 Hz, 2H), 1.19 (t, *J* = 7.2 Hz, 3H), 1.00 (t, *J* = 7.2 Hz, 3H).

**<sup>13</sup>C NMR (151 MHz, CDCl<sub>3</sub>)**  $\delta$  167.24 (d, *J* = 1.8 Hz), 156.81 (d, *J* = 240.3 Hz), 151.35 (d, *J* = 2.1 Hz), 128.03 (d, *J* = 6.9 Hz), 115.91 (d, *J* = 22.8 Hz), 114.45 (d, *J* = 24.4 Hz), 112.18 (d, *J* = 8.0 Hz), 56.14, 42.79, 38.91, 13.93, 12.81.

**<sup>9</sup>F NMR (376 MHz, CDCl<sub>3</sub>)**  $\delta$  -123.19 (td, *J* = 8.0, 4.1 Hz).

**HRMS (ESI):** Calculated for C<sub>12</sub>H<sub>16</sub>FNO<sub>2</sub> (M+H)<sup>+</sup>: 226.1243; found: 226.1232.

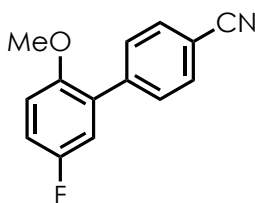

**5'-Fluoro-2'-methoxy-[1,1'-biphenyl]-4-carbonitrile (13)** To a dry, clean 3-neck round bottomed flask equipped with a stir bar and a condenser was added (5-fluoro-2-methoxyphenyl)boronic acid (357 mg, 2.10 mmol, 1.05 eq.), potassium carbonate (829 mg, 6.00 mmol, 3.0 eq.) and 4-bromobenzonitrile (364 mg, 2.00 mmol, 1.0 eq.). The flask was then transferred to a glovebox (N<sub>2</sub>), where tetrakis(triphenylphosphine)-palladium(0) (231.1 mg, 0.200 mmol, 0.10 eq.) was added to the mixture. The flask was then sealed with rubber septa, brought out of the glovebox and placed under positive N<sub>2</sub> pressure. 1,2-Dimethoxyethane (13 mL) and degassed H<sub>2</sub>O (4 mL) were then added to the reaction mixture and stirred. The suspension was then purged and backfilled three times with N<sub>2</sub> before being heated to 80 °C for 22 h. At the end of the reaction, the mixture was cooled to room temperature and subsequently diluted with ether. The suspension was then neutralized with 2 N HCl solution (10 mL) and the layers were separated. The aqueous layer was then extracted twice with ether (2 x 10 mL) and the organic layers were combined. The organic layers were then washed sequentially with NaHCO<sub>3</sub> solution and brine, dried over Na<sub>2</sub>SO<sub>4</sub> and concentrated to yield an off-white solid. The crude product was then purified by flash chromatography (10 to 15% EtOAc:Hex) to yield a white solid (426 mg, 94%).

**<sup>1</sup>H NMR (600 MHz, CDCl<sub>3</sub>)**  $\delta$  7.69 (d, *J* = 8.4 Hz, 1H), 7.62 (d, *J* = 8.4 Hz, 1H), 7.07 (ddd, *J* = 9.0, 7.8, 3.2 Hz, 1H), 7.03 (dd, *J* = 8.8, 3.1 Hz, 1H), 6.94 (dd, *J* = 9.0, 4.4 Hz, 1H), 3.80 (s, 3H).

**<sup>13</sup>C NMR (151 MHz, CDCl<sub>3</sub>)**  $\delta$  156.98 (d, *J* = 239.8 Hz), 152.44 (d, *J* = 2.4 Hz), 142.09, 129.65 (d, *J* = 7.3 Hz), 117.08 (d, *J* = 23.8 Hz), 115.62 (d, *J* = 22.6 Hz), 112.41 (d, *J* = 8.2 Hz), 56.06.

**<sup>19</sup>F NMR (376 MHz, CDCl<sub>3</sub>)** δ -123.36 (td, *J* = 8.3, 4.6 Hz).

**HRMS (ESI):** Calculated for C<sub>14</sub>H<sub>9</sub>ClFNO (M+H)<sup>+</sup>: 228.0825; found: 228.0814.

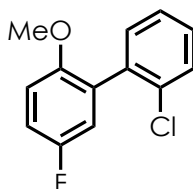

**2'-Chloro-5-fluoro-2-methoxy-1,1'-biphenyl (14)** To a dry, clean 3-neck round bottomed flask equipped with a stir bar and a condenser was added (2-chlorophenyl)boronic acid (1.06 g, 6.80 mmol, 1.7 eq.) and potassium carbonate (1.38 g, 10.0 mmol, 2.5 eq.). The flask was transferred into a glovebox (N<sub>2</sub>), where tetrakis(triphenylphosphine)-palladium(0) (231.1 mg, 0.200 mmol, 0.10 eq.) was added to the mixture. The flask was then sealed with rubber septa, brought out of the glovebox and placed under positive N<sub>2</sub> pressure. 1,2-Dimethoxyethane (27 mL) and degassed H<sub>2</sub>O (5 mL) were then added to the reaction mixture and stirred. 2-Bromo-4-fluoroanisole (0.52 mL, 4.00 mmol, 1.0 eq.) was added to the reaction before the suspension was purged and backfilled three times with N<sub>2</sub>. The reaction was then heated to 80 °C for 22 h. At the end of the reaction, the mixture was cooled to room temperature and subsequently diluted with ether. The suspension was then neutralized with 2 N HCl solution (10 mL) and the layers were separated. The aqueous layer was then extracted twice with ether (2 x 10 mL) and the organic layers were combined. The organic layers were then washed sequentially with NaHCO<sub>3</sub> solution and brine, dried over Na<sub>2</sub>SO<sub>4</sub> and concentrated. The crude product was then purified by flash chromatography (10 to 15% EtOAc:Hex) to yield a colorless liquid (900 mg, 95%).

**<sup>1</sup>H NMR (600 MHz, CDCl<sub>3</sub>)** δ 7.50 (dt, *J* = 7.6, 3.0 Hz, 1H), 7.33 (dd, *J* = 5.9, 3.7 Hz, 3H), 7.10 (ddd, *J* = 9.0, 8.0, 3.2 Hz, 1H), 6.98 (dd, *J* = 8.6, 3.2 Hz, 1H), 6.94 (dd, *J* = 9.0, 4.4 Hz, 1H), 3.78 (s, 3H).

**<sup>13</sup>C NMR (151 MHz, CDCl<sub>3</sub>)** δ 156.74 (d, *J* = 238.9 Hz), 153.13 (d, *J* = 2.2 Hz), 136.74 (d, *J* = 1.8 Hz), 133.84, 131.60, 129.86 (d, *J* = 8.0 Hz), 129.53, 129.02, 126.62, 117.89 (d, *J* = 23.3 Hz), 115.21, 112.09 (d, *J* = 8.3 Hz), 56.30.

**<sup>19</sup>F NMR (376 MHz, CDCl<sub>3</sub>)** δ -124.24 (td, *J* = 8.2, 4.4 Hz).

**HRMS (ESI):** Calculated for C<sub>13</sub>H<sub>10</sub>ClFO (M)<sup>+</sup>: 236.0404; found: 236.0256.

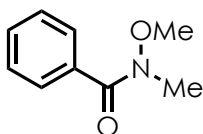

**N-methoxy-N-methylbenzamide (i-1)** was prepared according to a published procedure; spectra data are in agreement with literature values. (64)

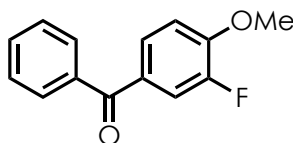

**(3-Fluoro-4-methoxyphenyl)(phenyl)methanone (17)** To a clean, dry round-bottomed flask equipped with a stir bar was added 4-bromo-2-fluoroanisole (0.38 mL, 2.94 mmol, 0.91 eq.) under N<sub>2</sub>. Then THF (20 mL) was added and the reaction was cooled to -78 °C. A solution of nBuLi (2.5 M in

hexanes, 1.3 mL, 3.23 mmol, 1.0 eq.) was added dropwise under positive N<sub>2</sub> pressure and the reaction was allowed to stir for 20 minutes. A solution of *N*-methoxy-*N*-methylbenzamide (0.535 g, 3.24 mmol, 1.0 eq.) in THF (5 mL) was prepared and added dropwise to the aryllithium species under positive N<sub>2</sub> pressure. The solution was allowed to stir at -78 °C for 1.5 h and subsequently quenched at -78°C with *i*-PrOH (5 mL) and DI H<sub>2</sub>O (5 mL), and allowed to warm to room temperature. Ether (10 mL) and DI H<sub>2</sub>O (10 mL) were then added to the reaction mixture and the layers were separated. The aqueous layer was extracted with ether (10 mL x 2) and the organic layers were combined. The combined organic fractions were washed with brine, dried over Na<sub>2</sub>SO<sub>4</sub> and concentrated. The crude mixture was purified via flash chromatography (10 to 20% EtOAc:Hex) to yield (3-fluoro-4-methoxyphenyl)(phenyl)methanone as a white solid (0.447 g, 60%). The spectral data for the product are in agreement with literature values. (65)

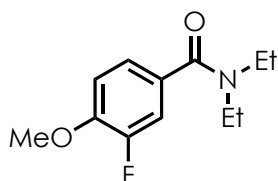

***N,N*-diethyl-3-fluoro-4-methoxybenzamide (19)** To a clean, dry round bottomed flask equipped with a stir bar was added 3-fluoro-4-methoxybenzoic acid (0.680 mg, 4.00 mmol, 1.0 eq.). The solid was dissolved in PhMe (10 mL) before a catalytic amount of DMF (16.0 μL, 0.20 mmol, 0.05 eq.) and thionyl chloride (0.58 mL, 8.00 mmol, 2.0 eq.) was added. The reaction was allowed to stir for 2 h. before being concentrated under reduced pressure to yield the acid chloride as a pale yellow solid. The crude product was then dissolved in 10 mL of DCM under N<sub>2</sub> and cooled to 0 °C. Triethylamine (1.40 mL, 10.0 mmol, 2.5 eq.) and diethylamine (0.54 mL, 5.2 mmol, 1.3 eq.) were sequentially added and the reaction mixture was stirred at 0 °C for 30 min. before warming up to room temperature, where it was stirred further for an additional hour. At the end of the reaction, the mixture was quenched with 10 mL dilute acid (3 N HCl solution) and the layers were separated. The aqueous layer was extracted with 2 x 10 mL of DCM and the organic layers were combined. The organic layers were washed sequentially with saturated NaHCO<sub>3</sub> solution and brine, dried over Na<sub>2</sub>SO<sub>4</sub> and concentrated to yield a yellow liquid. The crude product was then purified by flash chromatography (50% EtOAc:Hex) to yield *N,N*-diethyl-3-fluoro-4-methoxybenzamide as pale yellow liquid (0.79 g, 88%).

**<sup>1</sup>H NMR (600 MHz, CDCl<sub>3</sub>)** δ 7.04 – 6.93 (m, 2H), 6.86 (t, *J* = 8.5 Hz, 1H), 3.77 (s, 3H), 3.43 – 3.02 (m, 4H, 2 rotamers), 1.05 (bs, 6H, 2 rotamers).

**<sup>13</sup>C NMR (151 MHz, CDCl<sub>3</sub>)** δ 151.61 (d, *J* = 247.4 Hz), 148.30 (d, *J* = 10.4 Hz), 129.59 (d, *J* = 5.6 Hz), 122.70 (d, *J* = 3.7 Hz), 114.64 (d, *J* = 19.5 Hz), 112.83 (d, *J* = 2.1 Hz), 56.00, 43.20, 39.32, 13.92, 12.66.

**<sup>19</sup>F NMR (376 MHz, CDCl<sub>3</sub>)** δ -129.35 – -145.34 (m).

**HRMS (ESI):** Calculated for C<sub>12</sub>H<sub>16</sub>FNO<sub>2</sub> (M+H)<sup>+</sup>: 226.1243; found: 226.1232.

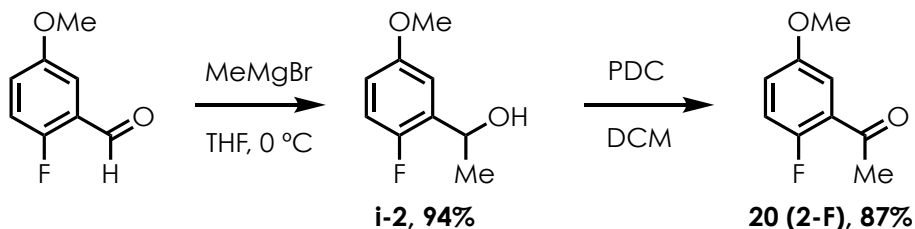

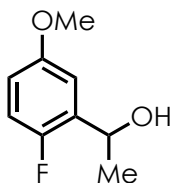

**1-(2-Fluoro-5-methoxyphenyl)ethan-1-ol (i-2)** To a clean, dry 2-neck round bottomed flask equipped with a stir bar was added 2-fluoro-5-methoxybenzaldehyde (0.50 mL, 4.00 mmol, 1.0 eq.), which was then dissolved in THF (10 mL) under N<sub>2</sub>. The reaction was cooled to 0 °C before a solution of methylmagnesium bromide (3.0 M in THF, 1.6 mL, 4.80 mmol, 1.2 eq.) was added dropwise. The reaction was then warmed up to room temperature and allowed to stir for 5 h. After the reaction was complete, the solution was quenched with HCl solution (3 N, 10 mL) and diluted with EtOAc (15 mL). The layers were separated and the aqueous layer was extracted once with 10 mL of EtOAc. The organic layers were combined, washed with brine, dried over Na<sub>2</sub>SO<sub>4</sub> and concentrated. The crude product was purified via flash chromatography (10 to 30% EtOAc:Hex) to yield 1-(2-fluoro-5-methoxyphenyl)ethan-1-ol (0.64 g, 94%).

**<sup>1</sup>H NMR (600 MHz, CDCl<sub>3</sub>)** δ 7.00 (dd, *J* = 6.0, 3.2 Hz, 1H), 6.92 (t, *J* = 9.4 Hz, 1H), 6.72 (dt, *J* = 8.9, 3.6 Hz, 1H), 5.14 (qd, *J* = 6.5, 2.6 Hz, 1H), 3.77 (s, 3H), 2.33 (s, 1H), 1.47 (d, *J* = 6.6 Hz, 3H).  
**<sup>13</sup>C NMR (151 MHz, CDCl<sub>3</sub>)** δ 155.89 (d, *J* = 2.0 Hz), 153.95 (d, *J* = 237.5 Hz), 133.55 (d, *J* = 15.3 Hz), 115.90 (d, *J* = 23.8 Hz), 113.55 (d, *J* = 8.2 Hz), 111.36 (d, *J* = 4.5 Hz), 64.54 (d, *J* = 2.5 Hz), 55.82, 24.11.  
**<sup>19</sup>F NMR (376 MHz, CDCl<sub>3</sub>)** δ -130.65 (dt, *J* = 10.1, 4.6 Hz).

**HRMS (ESI):** Calculated for C<sub>9</sub>H<sub>11</sub>FO<sub>2</sub> (M+)<sup>+</sup>: 170.07430; found: 170.0731

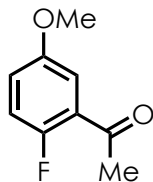

**1-(2-Fluoro-5-methoxyphenyl)ethan-1-one (20, 2-F)** To a clean, dry round bottomed flask equipped with a stir bar was added 1-(2-fluoro-5-methoxyphenyl)ethan-1-ol (0.53 g, 3.12 mmol, 1.0 eq.), which was then dissolved in 10 mL of DCM. Pyridinium dichromate (3.52 g, 9.36 mmol, 3.0 eq.) was then added to the reaction mixture and allowed to stir overnight. At the end of the reaction, the solution was diluted with 20 mL of DCM and filtered through Celite. The filtrate was then concentrated and purified via flash chromatography (5-10% EtOAc:Hex) to yield 1-(2-fluoro-5-methoxyphenyl)ethan-1-one as a colorless liquid (0.45 g, 87%).

**<sup>1</sup>H NMR (600 MHz, CDCl<sub>3</sub>)** δ 7.32 – 7.28 (m, 1H), 7.04 – 7.02 (m, 1H), 7.02 (d, *J* = 1.9 Hz, 1H), 3.78 (s, 3H), 2.61 (d, *J* = 5.4 Hz, 3H).  
**<sup>13</sup>C NMR (151 MHz, CDCl<sub>3</sub>)** δ 195.83 (d, *J* = 3.8 Hz), 156.99 (d, *J* = 247.9 Hz), 155.68 (d, *J* = 1.9 Hz), 125.58 (d, *J* = 14.4 Hz), 121.79 (d, *J* = 8.8 Hz), 117.72 (d, *J* = 26.4 Hz), 112.60 (d, *J* = 2.7 Hz), 55.91, 31.57 (d, *J* = 8.1 Hz).  
**<sup>19</sup>F NMR (376 MHz, CDCl<sub>3</sub>)** δ -119.33 (dt, *J* = 8.1, 4.8 Hz).

**HRMS (ESI):** Calculated for C<sub>9</sub>H<sub>9</sub>FO<sub>2</sub> (M+H)<sup>+</sup>: 169.06593; found: 169.0656.

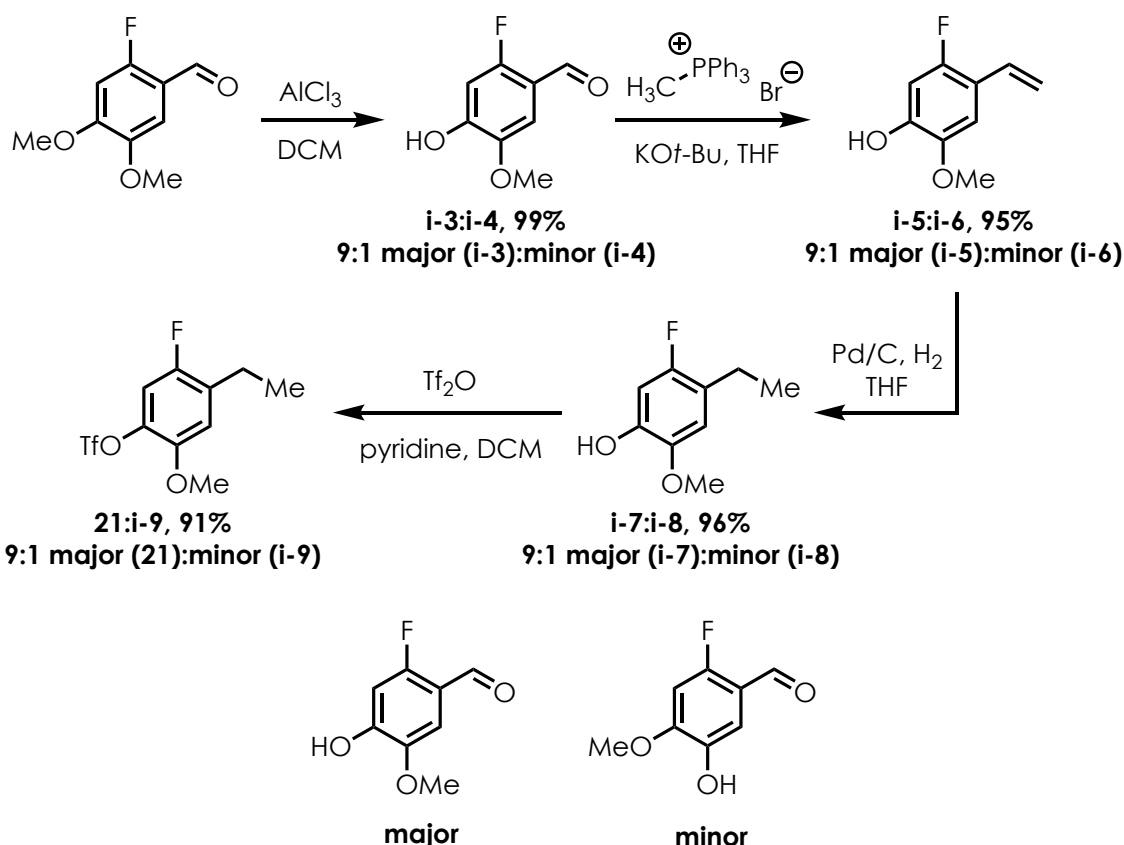

**2-Fluoro-4-hydroxy-5-methoxybenzaldehyde (i-3, major) and 2-fluoro-5-hydroxy-4-methoxybenzaldehyde (i-4, minor)** To a clean, dry round bottomed flask equipped with a stir bar was added 2-fluoro-4,5-dimethoxybenzaldehyde (1.84 g, 10.0 mmol, 1.0 eq.), which was then dissolved in 100 mL of DCM. Aluminum trichloride (8.00 g, 60.0 mmol, 6.0 eq.) was then added in three portions to the reaction mixture and the reaction was kept under  $\text{N}_2$  for 20 h. The reaction was then carefully poured into ice (**caution: exothermic!**) and stirred until all the ice was melted. The organic layer was then separated, dried over  $\text{MgSO}_4$  and concentrated to yield an off-white solid. The crude product (1.68 g, 98.8%) was clean by  $^1\text{H}$ -NMR analysis and showed an approximate 9:1 ratio of the major isomer 2-fluoro-4-hydroxy-5-methoxybenzaldehyde to the minor isomer 2-fluoro-5-hydroxy-4-methoxybenzaldehyde. The assigned peaks for the products are in agreement with reported spectra (66) and the crude product was carried forward without further purification.

#### Major:

**$^1\text{H}$  NMR (600 MHz,  $\text{CDCl}_3$ )**  $\delta$  10.21 (s, 1H), 7.29 (d,  $J$  = 6.1 Hz, 1H), 6.71 (d,  $J$  = 10.9 Hz, 1H), 6.38 (d,  $J$  = 1.6 Hz, 1H), 3.93 (s, 3H).

**$^{13}\text{C}$  NMR (151 MHz,  $\text{CDCl}_3$ )**  $\delta$  185.97 (d,  $J$  = 6.9 Hz), 161.63 (d,  $J$  = 253.0 Hz), 153.15 (d,  $J$  = 13.4 Hz), 143.81 (d,  $J$  = 2.0 Hz), 116.58 (d,  $J$  = 9.0 Hz), 107.64 (d,  $J$  = 3.4 Hz), 102.90 (d,  $J$  = 26.3 Hz), 56.61.

**$^{19}\text{F}$  NMR (376 MHz,  $\text{CDCl}_3$ )**  $\delta$  -128.32. (ddd,  $J$  = 11.0, 6.1, 1.5 Hz)

#### Minor:

**$^1\text{H}$  NMR (600 MHz,  $\text{CDCl}_3$ )**  $\delta$  10.21 (s, 1H), 7.35 (d,  $J$  = 6.7 Hz, 1H), 6.65 (d,  $J$  = 11.2 Hz, 1H), 5.52 (s, 1H), 3.97 (s, 3H).

**$^{13}\text{C}$  assignments for the minor isomer were not provided due to low abundance.**

**$^{19}\text{F}$  NMR (376 MHz,  $\text{CDCl}_3$ )**  $\delta$  -128.58 (multiplet not assigned due to low abundance)

**HRMS (ESI):** Calculated for  $\text{C}_8\text{H}_7\text{FO}_3$  ( $\text{M}+\text{H}$ ) $^+$ : 171.0448; found: 171.0457.

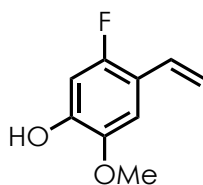

major

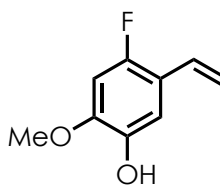

minor

**5-Fluoro-2-methoxy-4-vinylphenol (i-5, major) and 4-fluoro-2-methoxy-5-vinylphenol (i-6, minor)** To a clean, dry two-neck round bottomed flask equipped with an addition funnel and a stir bar was added methyltriphenylphosphonium bromide (5.29 g, 14.8 mmol, 1.5 eq.), which was dissolved in dry THF (20 mL). The reaction was then placed under N<sub>2</sub> and potassium *tert*-butoxide (2.77 g, 24.7 mmol, 2.5 eq.) was added to the mixture, which turned bright yellow, and the suspension was stirred for 10 minutes. A solution of 2-fluoro-4-hydroxy-5-methoxybenzaldehyde and 2-fluoro-5-hydroxy-4-methoxybenzaldehyde (9:1) in THF (10 mL) was prepared and transferred to the addition funnel, where it was then added to the ylide suspension. The reaction was then stirred overnight at room temperature and when the reaction was complete, it was quenched with saturated ammonium chloride solution (15 mL) and diluted with DCM (20 mL). The layers were separated and the aqueous layer was extracted twice with DCM (2 x 10 mL). The organic layers were collected and washed with brine, dried over Na<sub>2</sub>SO<sub>4</sub> and concentrated. The crude product was then purified via flash chromatography (15 to 30% EtOAc:Hex) to yield a pale, off-white solid (1.57 g, 95%) containing a 9:1 ratio of 5-fluoro-2-methoxy-4-vinylphenol to 4-fluoro-2-methoxy-5-vinylphenol.

**Major:**

**<sup>1</sup>H NMR (600 MHz, CDCl<sub>3</sub>)** δ 6.92 (d, *J* = 6.8 Hz, 1H), 6.81 (dd, *J* = 17.7, 11.2 Hz, 1H), 6.65 (d, *J* = 10.9 Hz, 1H), 5.75 (s, 1H), 5.64 (dd, *J* = 17.7, 1.1 Hz, 1H), 5.24 (dd, *J* = 11.2, 1.1 Hz, 1H), 3.90 (s, 3H).

**<sup>13</sup>C NMR (151 MHz, CDCl<sub>3</sub>)** δ 155.14 (d, *J* = 243.1 Hz), 146.40 (d, *J* = 13.1 Hz), 143.20 (d, *J* = 2.6 Hz), 129.21 (d, *J* = 3.8 Hz), 116.52 (d, *J* = 13.8 Hz), 113.60 (d, *J* = 4.6 Hz), 107.76 (d, *J* = 5.3 Hz), 102.86 (d, *J* = 27.8 Hz), 56.50.

**<sup>19</sup>F NMR (376 MHz, CDCl<sub>3</sub>)** δ -125.67.

**Minor:**

**<sup>1</sup>H NMR (600 MHz, CDCl<sub>3</sub>)** δ 7.03 (d, *J* = 7.3 Hz, 1H), 6.79 (dd, *J* = 17.7, 11.2 Hz, 1H), 6.58 (d, *J* = 11.2 Hz, 1H), 5.65 (dd, *J* = 17.7, 1.1 Hz, 1H), 5.33 (s, 1H), 5.24 (dd, *J* = 11.2, 1.0 Hz, 1H), 3.87 (s, 3H).

**<sup>13</sup>C NMR (151 MHz, CDCl<sub>3</sub>)** δ 154.20 (d, *J* = 242.3 Hz), 146.75 (d, *J* = 10.1 Hz), 141.81 (d, *J* = 2.6 Hz), 128.74 (d, *J* = 3.8 Hz), 117.59 (d, *J* = 13.7 Hz), 114.30 (d, *J* = 4.4 Hz), 111.14 (d, *J* = 4.9 Hz), 99.36 (d, *J* = 28.6 Hz), 56.32.

**<sup>19</sup>F NMR (376 MHz, CDCl<sub>3</sub>)** δ -126.55.

**HRMS (ESI):** Calculated for C<sub>9</sub>H<sub>9</sub>FO<sub>2</sub> (M+H)<sup>+</sup>: 169.0656; found: 169.0665.

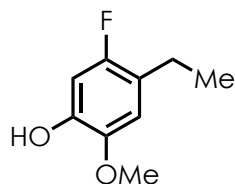

major

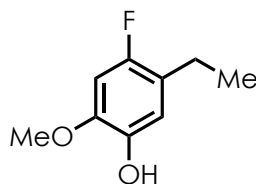

minor

**4-Ethyl-5-fluoro-2-methoxyphenol (i-7, major) and 5-ethyl-4-fluoro-2-methoxyphenol (i-8, minor)** To a dry, clean round bottomed flask equipped with a stir bar was added a solid containing a 9:1 mixture of 5-fluoro-2-methoxy-4-vinylphenol and 4-fluoro-2-methoxy-5-vinylphenol (1.54 g, 9.16 mmol, 1.0 eq.), which was then dissolved in 20 mL of a THF. 10% Palladium on carbon (97.5 mg, 0.92 mmol, 0.10 eq.) was added to the solution and the reaction was placed under N<sub>2</sub>. The solution was purged and backfilled with H<sub>2</sub> before being placed under a H<sub>2</sub> atmosphere (1 atm) overnight (reaction is typically done in about 2-3 hours). Once the reaction was complete, the solution was run through a Celite plug and concentrated. The crude mixture was then purified by flash chromatography (10% EtOAc:Hex) to yield a colorless liquid (1.50 g, 96%) containing a (9:1) mixture of 4-ethyl-5-fluoro-2-methoxyphenol to 5-ethyl-4-fluoro-2-methoxyphenol.

**Major:**

**<sup>1</sup>H NMR (600 MHz, CDCl<sub>3</sub>)** δ 6.65 (d, *J* = 7.1 Hz, 2H), 6.64 (d, *J* = 10.4 Hz, 2H), 5.63 (s, 1H), 5.63 (s, 1H), 3.86 (s, 3H), 2.59 (qd, *J* = 7.6, 1.3 Hz, 2H), 1.20 (t, *J* = 7.6 Hz, 3H).

**<sup>13</sup>C NMR (151 MHz, CDCl<sub>3</sub>)** δ 155.18 (d, *J* = 237.1 Hz), 144.30 (d, *J* = 12.6 Hz), 142.80 (d, *J* = 2.5 Hz), 121.43 (d, *J* = 17.8 Hz), 111.59 (d, *J* = 6.7 Hz), 102.66 (d, *J* = 28.2 Hz), 56.55, 22.03 (d, *J* = 2.4 Hz), 14.97.

**<sup>19</sup>F NMR (376 MHz, CDCl<sub>3</sub>)** δ -126.85 (dd, *J* = 10.3, 7.4 Hz)

**Minor:**

**<sup>1</sup>H NMR (600 MHz, CDCl<sub>3</sub>)** δ 6.75 (d, *J* = 7.4 Hz, 1H), 6.58 (d, *J* = 10.7 Hz, 1H), 5.36 (s, 1H), 3.84 (s, 3H), 2.60-2.55 (m, 2H), 1.20-1.17 (m, 3H).

**<sup>13</sup>C NMR (151 MHz, CDCl<sub>3</sub>)** δ 154.29 (d, *J* = 236.5 Hz), 144.79 (d, *J* = 10.0 Hz), 141.48 (d, *J* = 2.8 Hz), 122.71 (d, *J* = 17.6 Hz), 114.77 (d, *J* = 6.3 Hz), 99.38 (d, *J* = 28.6 Hz), 56.30, 21.61 (d, *J* = 2.6 Hz), 14.70.

**<sup>19</sup>F NMR (376 MHz, CDCl<sub>3</sub>)** δ -127.56 (dd, *J* = 10.7, 7.5 Hz).

**HRMS (ESI):** Calculated for C<sub>9</sub>H<sub>11</sub>FO<sub>2</sub> (M)<sup>+</sup>: 170.0734; found: 170.0749.

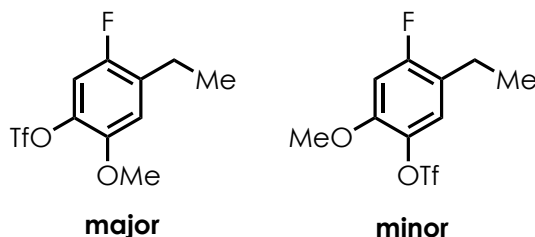

**4-Ethyl-5-fluoro-2-methoxyphenyl trifluoromethanesulfonate (21, major) and 5-ethyl-4-fluoro-2-methoxyphenyl trifluoromethanesulfonate (i-9, minor)** To a dry, clean round bottomed flask equipped with a stir bar was added a 9:1 mixture of 4-ethyl-5-fluoro-2-methoxyphenol to 5-ethyl-4-fluoro-2-methoxyphenol (1.10 g, 6.46 mmol, 1.0 eq.), which was then dissolved in 20 mL of DCM under N<sub>2</sub>. The solution was cooled to 0 °C before pyridine (1.0 mL, 12.9 mmol, 2.0 eq.) was added to the solution. Trifluoromethanesulfonic anhydride (1.31 mL, 7.76 mmol, 1.2 eq.) was then added to the reaction dropwise and the solution was stirred for 15 minutes before being warmed to room temperature. The reaction was then run for 2 h. before being quenched with DI water. The reaction was then diluted with DCM before the layers were separated. The aqueous layer was extracted once with DCM (10 mL) and the organic layers were combined, washed sequentially with 10 mL of dilute HCl (2.0 M) and brine, dried over Na<sub>2</sub>SO<sub>4</sub> and concentrated. The crude product was purified via flash chromatography (10% EtOAc) to yield a yellow liquid (1.77 g, 91%) consisting of a 9:1 mixture of 4-ethyl-5-fluoro-2-methoxyphenyl trifluoromethanesulfonate to 5-ethyl-4-fluoro-2-methoxyphenyl trifluoromethanesulfonate.

**Major:**

**<sup>1</sup>H NMR (600 MHz, CDCl<sub>3</sub>)** δ 6.94 (d, *J* = 8.9 Hz, 1H), 6.86 (d, *J* = 6.8 Hz, 1H), 3.88 (s, 3H), 2.67 (qd, *J* = 7.6, 1.4 Hz, 2H), 1.24 (t, *J* = 7.7 Hz, 3H).

**<sup>13</sup>C NMR (151 MHz, CDCl<sub>3</sub>)** δ 153.78 (d, *J* = 241.6 Hz), 147.92 (d, *J* = 3.0 Hz), 136.05 (d, *J* = 11.1 Hz), 132.12 (d, *J* = 17.5 Hz), 118.87 (q, *J* = 320.3 Hz), 113.82 (d, *J* = 5.7 Hz), 110.27 (d, *J* = 28.1 Hz), 56.66, 22.50 (d, *J* = 2.2 Hz), 14.24 (d, *J* = 1.2 Hz).

**<sup>19</sup>F NMR (376 MHz, CDCl<sub>3</sub>)** δ -73.71, -125.35.

**Minor:**

**<sup>1</sup>H NMR (600 MHz, CDCl<sub>3</sub>)** δ 7.06 (d, *J* = 7.1 Hz, 1H), 6.72 (d, *J* = 10.8 Hz, 1H), 3.87 (s, 3H), 2.61 (qd, *J* = 7.5, 1.2 Hz, 2H), 1.20 (t, *J* = 7.6 Hz, 3H).

**<sup>13</sup>C NMR (151 MHz, Chloroform-*d*)** δ 160.09 (d, *J* = 247.4 Hz), 150.48 (d, *J* = 10.6 Hz), 134.58 (d, *J* = 3.4 Hz), 123.37 (d, *J* = 19.1 Hz), 123.12 (d, *J* = 7.8 Hz), 118.90 (q, *J* = 320.3 Hz), 101.40 (d, *J* = 28.7 Hz), 56.53, 21.43 (d, *J* = 2.2 Hz), 14.19.

**<sup>19</sup>F NMR (376 MHz, CDCl<sub>3</sub>)** δ -73.68, -114.61.

**HRMS (ESI):** Calculated for C<sub>10</sub>H<sub>10</sub>F<sub>4</sub>O<sub>4</sub>S (M+H)<sup>+</sup>: 303.0309; found: 303.0412.

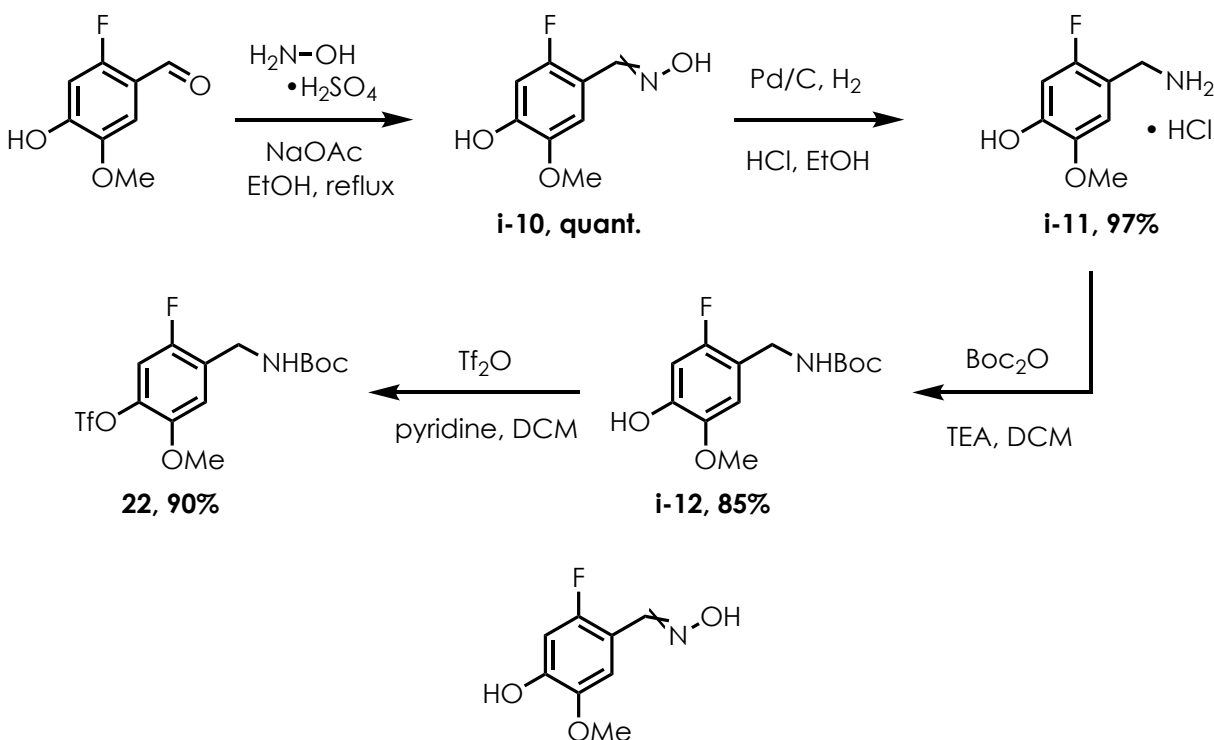

**2-Fluoro-4-hydroxy-5-methoxybenzaldehyde oxime (i-10)** To a clean, dry two-neck round bottomed flask equipped with a condenser and a stir bar was added 2-fluoro-4-hydroxy-5-methoxybenzaldehyde (681 mg, 4.00 mmol, 1.0 eq.), which was then dissolved in EtOH (8 mL) and placed under N<sub>2</sub>. Hydroxylamine sulfate (629 mg, 4.80 mmol, 1.2 eq.) and sodium acetate (328 mg, 4.00 mmol, 1.0 eq.) were then added successively to the reaction mixture and the suspension was refluxed for 4 h. Once the reaction was complete, it was cooled to room temperature and concentrated under reduced pressure. The crude mixture was then resuspended in CH<sub>2</sub>Cl<sub>2</sub> (10 mL), filtered and washed with CH<sub>2</sub>Cl<sub>2</sub>. The filtrate was then concentrated and purified via flash chromatography (30% EtOAc:Hex) to yield 2-fluoro-4-hydroxy-5-methoxybenzaldehyde oxime as a white solid (740 mg, 99%).

**<sup>1</sup>H NMR (600 MHz, DMSO-*d*<sub>6</sub>)** δ 11.20 (s, 1H), 10.00 (s, 1H), 8.08 (s, 1H), 7.14 (d, *J* = 6.9 Hz, 1H), 6.64 (d, *J* = 11.5 Hz, 1H), 3.76 (s, 3H).

**<sup>13</sup>C NMR (151 MHz, DMSO-*d*<sub>6</sub>)** δ 154.74 (d, *J* = 242.8 Hz), 149.38 (d, *J* = 11.8 Hz), 144.84 (d, *J* = 1.7 Hz), 141.55 (d, *J* = 2.3 Hz), 110.12 (d, *J* = 12.1 Hz), 108.02 (d, *J* = 4.8 Hz), 103.23 (d, *J* = 25.4 Hz), 56.01.

**<sup>19</sup>F NMR (376 MHz, DMSO)** δ -127.84 (dt, *J* = 11.6, 5.6 Hz).

**HRMS (ESI):** Calculated for C<sub>8</sub>H<sub>8</sub>FN<sub>2</sub>O<sub>3</sub> (M+H)<sup>+</sup>: 186.05609; found: 186.05579.

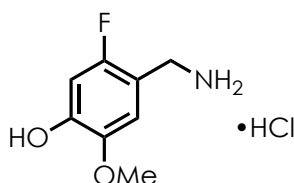

**4-(Aminomethyl)-5-fluoro-2-methoxyphenol hydrochloride (i-11)** To a dry, clean round bottomed flask equipped with a stir bar was added 2-fluoro-4-hydroxy-5-methoxybenzaldehyde oxime (0.699 g, 3.78 mmol, 1.0 eq.), which was then dissolved in 50 mL of EtOH. 10% Palladium on carbon (40.2 mg, 0.38 mmol, 0.10 eq.) and HCl (14 N, 2.73 mL, 90 mmol, 24 eq.) were added to the solution and the reaction was placed under N<sub>2</sub>. The solution was purged and backfilled with H<sub>2</sub> before being placed under a H<sub>2</sub> atmosphere (1 atm) overnight (reaction is typically done in about 2-3 hours). Once the reaction was complete, the solution was run through a Celite plug and concentrated. The crude product was then reconstituted in EtOH and concentrated again to remove excess HCl. This process yields 4-(aminomethyl)-5-fluoro-2-methoxyphenol hydrochloride as a tan-grey solid (0.760 g, 97%).

**<sup>1</sup>H NMR (600 MHz, DMSO-*d*<sub>6</sub>)** δ 9.87 (s, 1H), 8.39 (s, 3H), 7.21 (d, *J* = 7.3 Hz, 1H), 6.70 (d, *J* = 11.0 Hz, 1H), 3.91 (d, *J* = 5.1 Hz, 2H), 3.75 (s, 3H).

**<sup>13</sup>C NMR (151 MHz, DMSO-*d*<sub>6</sub>)** δ 154.50 (d, *J* = 238.8 Hz), 148.35 (d, *J* = 11.6 Hz), 144.30 (d, *J* = 2.0 Hz), 114.45 (d, *J* = 4.8 Hz), 109.69 (d, *J* = 16.1 Hz), 103.02 (d, *J* = 25.6 Hz), 56.33, 35.50 (d, *J* = 3.5 Hz).

**<sup>19</sup>F NMR (376 MHz, DMSO-*d*<sub>6</sub>)** δ -125.73 (dd, *J* = 10.8, 7.3 Hz).

**HRMS (ESI):** Calculated for C<sub>8</sub>H<sub>10</sub>FN<sub>2</sub>O<sub>2</sub> (M+H)<sup>+</sup>: 172.07683; found: 172.07653 (only free amine mass detected).

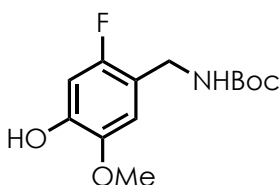

**Tert-butyl (2-fluoro-4-hydroxy-5-methoxybenzyl)carbamate (i-12)** To a dry, clean round bottomed flask equipped with a stir bar was added 4-(aminomethyl)-5-fluoro-2-methoxyphenol hydrochloride (300 mg, 1.45 mmol, 1.0 eq.), which was dissolved in 10 mL of DCM. The suspension is then placed under N<sub>2</sub> and cooled to 0 °C before successive additions of triethylamine (0.66 mL, 4.77 mmol, 3.3 eq.) and di-*tert*-butyl dicarbonate (0.34 mL, 1.46 mmol, 1.01 eq.). The reaction is allowed to stir for 30 min. before it is warmed to room temperature and stirred overnight. At the end of the reaction, the reaction was quenched with DI H<sub>2</sub>O and the layers separated. The aqueous layer was extracted with DCM (2 x 5 mL) and the organic layers were combined, dried over MgSO<sub>4</sub> and concentrated under reduced pressure. The crude product was purified via flash chromatography (30 to

40% EtOAc:Hex) to yield *tert*-butyl (2-fluoro-4-hydroxy-5-methoxybenzyl)carbamate as a white solid (333.0 mg, 85%)

**<sup>1</sup>H NMR (600 MHz, CDCl<sub>3</sub>)** δ 6.76 (d, *J* = 6.5 Hz, 1H), 6.59 (dd, *J* = 11.2, 4.7 Hz, 1H), 6.36 (bs, 1H), 5.06 (d, *J* = 17.1 Hz, 1H), 4.22 (t, *J* = 5.3 Hz, 2H), 3.77 (s, 3H), 1.42 (s, 9H).

**<sup>13</sup>C NMR (151 MHz, CDCl<sub>3</sub>)** δ 156.14, 155.21 (d, *J* = 238.1 Hz), 145.97 (d, *J* = 12.4 Hz), 143.10 (d, *J* = 2.1 Hz), 116.14 (d, *J* = 16.6 Hz), 111.87 (d, *J* = 5.6 Hz), 102.78 (d, *J* = 27.0 Hz), 79.69, 56.35, 38.42, 28.39.

**<sup>19</sup>F NMR (376 MHz, CDCl<sub>3</sub>)** δ -127.03 (d, *J* = 8.5 Hz).

**HRMS (ESI):** Calculated for C<sub>13</sub>H<sub>18</sub>FNO<sub>4</sub> (M+Na)<sup>+</sup>: 294.11123; found: 294.11040.

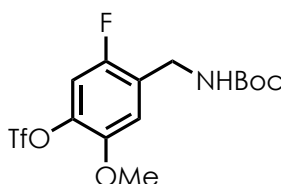

#### 4-(((*Tert*-butoxycarbonyl)amino)methyl)-5-fluoro-2-methoxyphenyl

**trifluoromethanesulfonate (22)** To a dry, clean round bottomed flask equipped with a stir bar was added *tert*-butyl (2-fluoro-4-hydroxy-5-methoxybenzyl)carbamate (0.197 g, 0.777 mmol, 1.0 eq.) and the solid was dissolved in 20 mL of DCM under N<sub>2</sub>. The solution was cooled to 0 °C before pyridine (0.13 mL, 1.56 mmol, 2.0 eq.) was added to the solution. Trifluoromethanesulfonic anhydride (0.16 mL, 0.932 mmol, 1.2 eq.) was then added to the reaction dropwise and the solution was stirred for 15 minutes before being warmed to room temperature. The reaction was then run for 2 h. before being quenched with DI water. The reaction was then diluted with DCM before the layers were separated. The aqueous layer was extracted once with DCM (10 mL) and the organic layers were combined, washed sequentially with 10 mL of dilute HCl (2.0 M) and brine, dried over Na<sub>2</sub>SO<sub>4</sub> and concentrated. The crude product was purified via flash chromatography (10% EtOAc) to yield 4-(((*tert*-butoxycarbonyl)amino)methyl)-5-fluoro-2-methoxyphenyl trifluoromethanesulfonate as a white solid (269 mg, 90%).

**<sup>1</sup>H NMR (600 MHz, CDCl<sub>3</sub>)** δ 7.04 (d, *J* = 6.6 Hz, 1H), 6.97 (d, *J* = 8.8 Hz, 1H), 4.98 (t, *J* = 6.3 Hz, 1H), 4.34 (d, *J* = 6.4 Hz, 2H), 3.88 (s, 3H), 1.45 (s, 9H).

**<sup>13</sup>C NMR (151 MHz, CDCl<sub>3</sub>)** δ 156.02, 153.55 (d, *J* = 242.3 Hz), 148.16 (d, *J* = 3.2 Hz), 137.20 (d, *J* = 10.8 Hz), 127.22 (d, *J* = 14.7 Hz), 118.81 (q, *J* = 320.6 Hz), 113.80, 110.65 (d, *J* = 27.2 Hz), 80.19, 56.81, 38.43, 28.47.

**<sup>19</sup>F NMR (376 MHz, CDCl<sub>3</sub>)** δ -73.77, -125.87 (t, *J* = 7.8 Hz).

**HRMS (ESI):** Calculated for C<sub>14</sub>H<sub>17</sub>F<sub>4</sub>NO<sub>6</sub>S (M+Na)<sup>+</sup>: 426.06051; found: 426.05936.

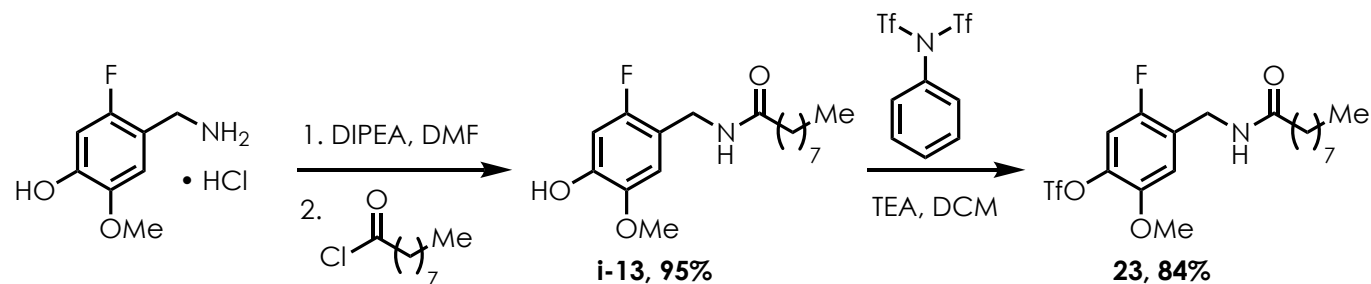

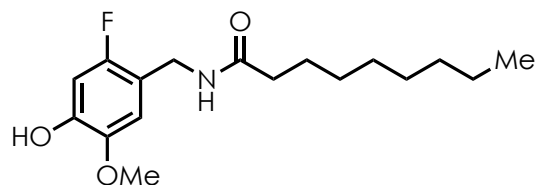

***N*-(2-fluoro-4-hydroxy-5-methoxybenzyl)nonanamide (i-13)** To a dry, clean round bottomed flask equipped with a stir bar was added 4-(aminomethyl)-5-fluoro-2-methoxyphenol hydrochloride (190 mg, 0.915 mmol, 1.0 eq.) which was then dissolved in DMF (2 mL) under N<sub>2</sub>. *N,N*-Diisopropylethylamine (0.32 mL, 1.83 mmol, 2.0 eq.) was then added to the solution, which was stirred for an hour at room temperature. Nonanoyl chloride (162 mg, 0.915 mmol, 1.0 eq.) was then added dropwise to the reaction and the reaction was allowed to stir for 5 h. At the end of the reaction, the mixture was diluted with EtOAc (15 mL) and DI H<sub>2</sub>O (25 mL). The layers were separated and the aqueous layer extracted twice with EtOAc (2 x 10 mL). The organic layers were then combined, washed sequentially with 20% LiCl solution (twice) and brine, dried over MgSO<sub>4</sub> and concentrated. The crude mixture was purified via flash chromatography (40 to 50% EtOAc:Hex) to yield *N*-(2-fluoro-4-hydroxy-5-methoxybenzyl)nonanamide as an off-white solid (261.3 mg, 95%). The isolated product contains minor impurity *N,N*-dimethylnonanamide (i-14, *vide infra*), which is inseparable from the desired product. Its spectral data are in agreement with literature values. (67)

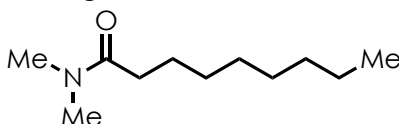

***N,N*-dimethylnonanamide (i-14)**

**<sup>1</sup>H NMR (600 MHz, CDCl<sub>3</sub>)** δ 6.82 (d, *J* = 6.8 Hz, 1H), 6.65 (d, *J* = 10.5 Hz, 1H), 5.94 (s, 1H), 5.82 (t, *J* = 6.1 Hz, 1H), 4.37 (dd, *J* = 5.9, 1.2 Hz, 2H), 3.84 (s, 3H), 2.22 – 2.06 (m, 2H), 1.62 (dq, *J* = 14.7, 7.1 Hz, 2H), 1.26 (dqt, *J* = 19.8, 13.0, 5.3 Hz, 10H), 0.86 (t, *J* = 7.1 Hz, 3H).

**<sup>13</sup>C NMR (151 MHz, CDCl<sub>3</sub>)** δ 173.25, 155.54 (d, *J* = 238.2 Hz), 146.14 (d, *J* = 12.6 Hz), 143.07 (d, *J* = 2.5 Hz), 115.90 (d, *J* = 16.9 Hz), 112.28 (d, *J* = 5.6 Hz), 102.73 (d, *J* = 27.3 Hz), 56.56, 37.43 (d, *J* = 3.2 Hz), 36.91, 31.92, 29.42, 29.39, 29.27, 25.84, 22.76, 14.21.

**<sup>19</sup>F NMR (376 MHz, CDCl<sub>3</sub>)** δ -126.99 (td, *J* = 11.4, 10.9, 6.3 Hz).

**HRMS (ESI):** Calculated for C<sub>17</sub>H<sub>26</sub>FNO<sub>3</sub> (M+H)<sup>+</sup>: 312.19695; found: 312.19606.

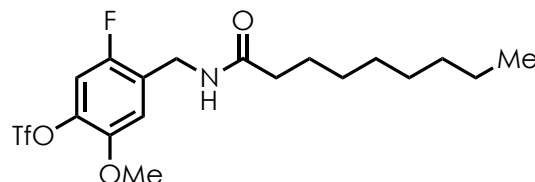

**5-Fluoro-2-methoxy-4-(nonanamidomethyl)phenyl trifluoromethanesulfonate (23)** To a dry, clean round bottomed flask equipped with a stir bar was added *N*-(2-fluoro-4-hydroxy-5-methoxybenzyl)nonanamide (248 mg, 0.795 mmol, 1.0 eq.), which was then dissolved in 10 mL of DCM under N<sub>2</sub>. The solution was then cooled to 0 °C before triethylamine (0.12 mL, 0.874 mmol, 1.1 eq.) and 1,1,1-trifluoro-*N*-phenyl-*N*-((trifluoromethyl)sulfonyl)methanesulfonamide (290 mg, 0.811 mmol, 1.02 eq.) were added consecutively to the reaction and the mixture was stirred for an additional 15 min. The reaction was then warmed to room temperature and stirred overnight before being quenched with DI water. The reaction was then diluted with DCM before the layers were separated. The aqueous layer was extracted once with DCM (10 mL) and the organic layers were combined, washed sequentially with 10 mL of dilute HCl (2.0 M) and brine, dried over Na<sub>2</sub>SO<sub>4</sub> and concentrated. The crude product was purified via flash chromatography (30 to 40% EtOAc) to yield 5-

fluoro-2-methoxy-4-(nonanamidomethyl)phenyl trifluoromethanesulfonate as an off-white solid (295.2 mg, 84%). The isolated product contains a minor amount of impurity *N,N*-dimethylnonanamide (*i*-14, *vide supra*).

**<sup>1</sup>H NMR (600 MHz, CDCl<sub>3</sub>)** δ 7.02 (d, *J* = 6.6 Hz, 1H), 6.93 (d, *J* = 8.8 Hz, 1H), 6.39 (t, *J* = 5.9 Hz, 1H), 4.40 (d, *J* = 6.1 Hz, 2H), 3.83 (s, 3H), 2.18 (t, *J* = 7.6 Hz, 2H), 1.59 (t, *J* = 7.3 Hz, 2H), 1.27 – 1.16 (m, 10H), 0.84 (t, *J* = 7.1 Hz, 3H).

**<sup>13</sup>C NMR (151 MHz, CDCl<sub>3</sub>)** δ 173.67, 153.55 (d, *J* = 242.8 Hz), 148.05 (d, *J* = 3.1 Hz), 137.14 (d, *J* = 10.9 Hz), 126.71 (d, *J* = 16.1 Hz), 118.73 (q, *J* = 320.5 Hz), 114.19 (d, *J* = 4.8 Hz), 110.52 (d, *J* = 27.1 Hz), 56.67, 37.07 (d, *J* = 3.2 Hz), 36.60, 31.85, 29.37, 29.35, 29.21, 25.78, 22.67, 14.08.

**<sup>19</sup>F NMR (376 MHz, CDCl<sub>3</sub>)** δ -73.61 (d, *J* = 2.7 Hz), -125.49 (t, *J* = 7.8 Hz).

**HRMS (ESI):** Calculated for C<sub>18</sub>H<sub>25</sub>F<sub>4</sub>NO<sub>5</sub>S (M+H)<sup>+</sup>: 444.14622; found: 444.14498.

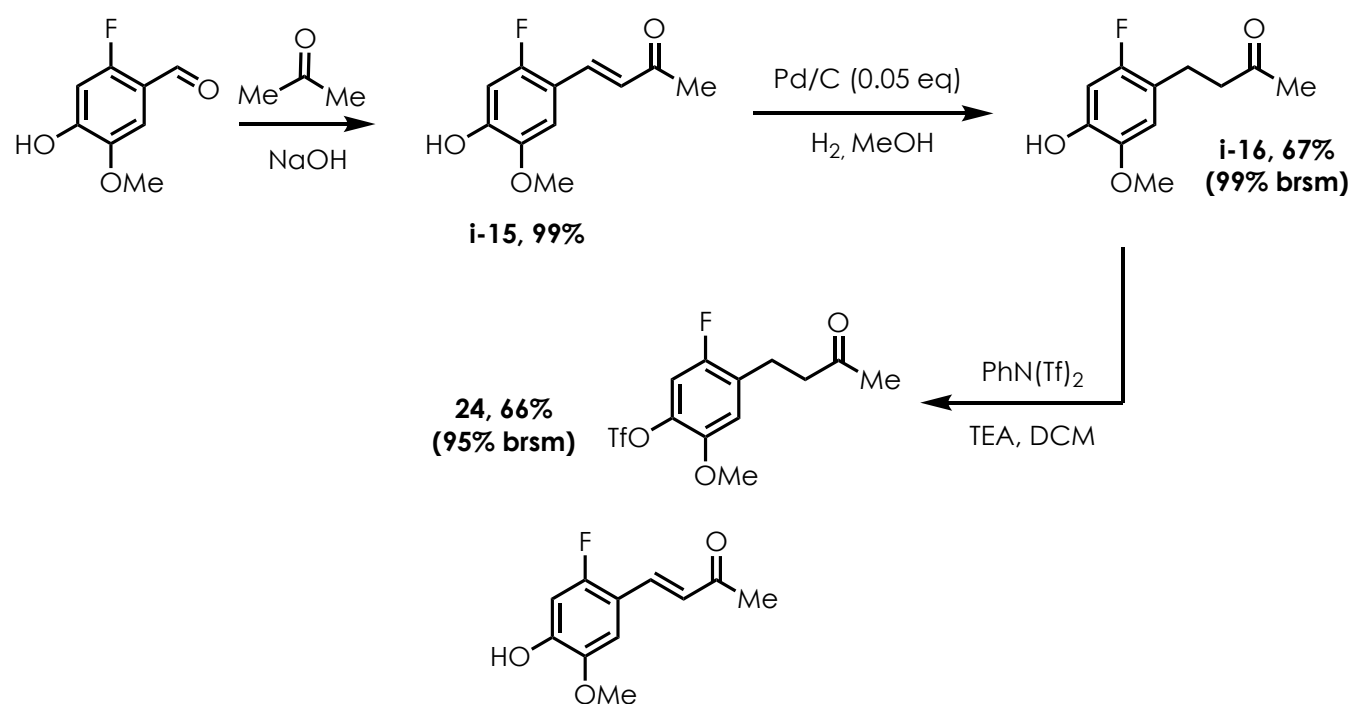

**(*E*)-4-(2-fluoro-4-hydroxy-5-methoxyphenyl)but-3-en-2-one (*i*-15)** To a dry, clean two-neck round bottomed flask equipped with an addition funnel and a stir bar was added 2-fluoro-4-hydroxy-5-methoxybenzaldehyde (341.3 mg, 2.01 mmol, 1.0 eq.), which was then dissolved in acetone (11 mL, 2.0 M) and placed under N<sub>2</sub>. An aqueous solution (1 N) of NaOH was transferred to the addition funnel, which was then added dropwise to the reaction mixture. The mixture was stirred at room temperature for 12 h. The reaction turned a bright yellow color upon addition of NaOH solution. At the end of the reaction, the reaction was neutralized with 2 N HCl, and the acetone was evaporated off under reduced pressure. The crude mixture was then diluted with EtOAc and the layers were separated. The aqueous layer was washed with EtOAc (2 x 15 mL) and the organic layers were combined, washed with brine, and dried with Na<sub>2</sub>SO<sub>4</sub>. The crude mixture was then concentrated and purified via column chromatography (50-60% EtOAc:Hex) to yield (*E*)-4-(2-fluoro-4-hydroxy-5-methoxyphenyl)but-3-en-2-one as a pale yellow solid (421.0 mg, 99%)

**<sup>1</sup>H NMR (600 MHz, CDCl<sub>3</sub>)** δ 7.64 (d, *J* = 16.4 Hz, 1H), 6.97 (d, *J* = 6.5 Hz, 1H), 6.70 (d, *J* = 10.9 Hz, 1H), 6.61 (d, *J* = 16.4 Hz, 1H), 6.11 (bs, 1H), 3.91 (s, 3H), 2.38 (s, 3H).

**<sup>13</sup>C NMR (151 MHz, CDCl<sub>3</sub>)** δ 198.76, 156.96 (d, *J* = 248.1 Hz), 149.32 (d, *J* = 12.9 Hz), 143.59 (d, *J* = 2.2 Hz), 136.09 (d, *J* = 3.6 Hz), 126.68 (d, *J* = 4.9 Hz), 113.58 (d, *J* = 12.9 Hz), 108.44 (d, *J* = 4.2 Hz), 103.27 (d, *J* = 27.6 Hz), 56.52, 27.25.

**<sup>19</sup>F NMR (565 MHz, CDCl<sub>3</sub>)** δ -121.06 (ddd, *J* = 10.6, 6.7, 3.9 Hz).

**HRMS (ESI):** Calculated for C<sub>11</sub>H<sub>11</sub>FO<sub>3</sub> (M+H)<sup>+</sup>: 211.07650; found: 211.07588

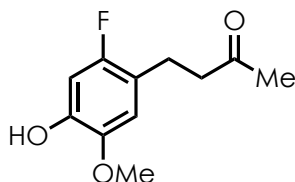

**4-(2-Fluoro-4-hydroxy-5-methoxyphenyl)butan-2-one (i-16)** To a dry, clean round bottomed flask equipped with a stir bar was added (*E*)-4-(2-fluoro-4-hydroxy-5-methoxyphenyl)but-3-en-2-one (0.4214 g, 2.01 mmol, 1.0 eq.), which was then dissolved in 10 mL of MeOH. 10% Palladium on carbon (21.3 mg, 0.201 mmol, 0.10 eq.) was added to the solution and the reaction was placed under N<sub>2</sub>. The solution was purged and backfilled with H<sub>2</sub> before being placed under a H<sub>2</sub> atmosphere (1 atm) overnight. The reaction was checked by TLC and no further conversion was observed after 12 h. The solution was then run through a Celite plug and concentrated. The crude product was then purified via column chromatography (30-50% EtOAc:Hex) to yield 4-(2-fluoro-4-hydroxy-5-methoxyphenyl)butan-2-one as a pale-yellow liquid (0.283 g, 67%) with (*E*)-4-(2-fluoro-4-hydroxy-5-methoxyphenyl)but-3-en-2-one recovered (134.8 mg, 32%) [99% brsm].

**<sup>1</sup>H NMR (600 MHz, CDCl<sub>3</sub>)** δ 6.66 (d, *J* = 6.9 Hz, 1H), 6.62 (d, *J* = 10.5 Hz, 1H), 5.63 (s, 1H), 3.84 (s, 3H), 2.82 (t, *J* = 7.4 Hz, 2H), 2.72 (t, *J* = 7.4 Hz, 2H), 2.13 (s, 3H).

**<sup>13</sup>C NMR (151 MHz, CDCl<sub>3</sub>)** δ 208.17, 155.35 (d, *J* = 237.2 Hz), 144.85 (d, *J* = 12.3 Hz), 142.79 (d, *J* = 2.7 Hz), 118.14 (d, *J* = 17.6 Hz), 112.48 (d, *J* = 6.3 Hz), 102.75 (d, *J* = 27.7 Hz), 56.56, 44.17, 30.18, 23.38 (d, *J* = 2.1 Hz).

**<sup>19</sup>F NMR (565 MHz, CDCl<sub>3</sub>)** δ -126.09 (td, *J* = 11.1, 6.8 Hz).

**HRMS (ESI):** Calculated for C<sub>11</sub>H<sub>13</sub>FO<sub>3</sub> (M+H)<sup>+</sup>: 213.09215; found: 213.09174

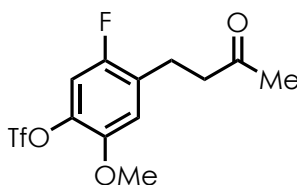

**5-fluoro-2-methoxy-4-(3-oxobutyl)phenyl trifluoromethanesulfonate (24)** To a dry, clean round bottomed flask equipped with a stir bar was added 4-(2-fluoro-4-hydroxy-5-methoxyphenyl)butan-2-one (272.7 mg, 1.40 mmol, 1.0 eq.), which was then dissolved in 20 mL of DCM under N<sub>2</sub>. The solution was then cooled to 0 °C before triethylamine (0.21 mL, 1.54 mmol, 1.1 eq.) and 1,1,1-trifluoro-*N*-phenyl-*N*-((trifluoromethyl)sulfonyl)methanesulfonamide (512 mg, 1.43 mmol, 1.02 eq.) were added consecutively to the reaction and the mixture was stirred for an additional 15 min. The reaction was then warmed to room temperature and stirred overnight before being quenched with DI water. The reaction was then diluted with DCM before the layers were separated. The aqueous layer was extracted once with DCM (20 mL) and the organic layers were combined, washed sequentially with 10 mL of dilute HCl (2.0 M) and brine, dried over Na<sub>2</sub>SO<sub>4</sub> and concentrated. The crude product was purified via flash chromatography (20 to 30% EtOAc) to yield 5-fluoro-2-methoxy-4-(3-oxobutyl)phenyl trifluoromethanesulfonate as a pale-yellow liquid (300.8 mg,

66%) with 4-(2-fluoro-4-hydroxy-5-methoxyphenyl)butan-2-one recovered (90.1 mg, 33%) [99% brsm].

**<sup>1</sup>H NMR (600 MHz, CDCl<sub>3</sub>)** δ 6.92 (d, *J* = 8.9 Hz, 1H), 6.89 (d, *J* = 6.7 Hz, 1H), 3.85 (s, 3H), 2.88 (t, *J* = 7.4 Hz, 2H), 2.76 (t, *J* = 7.3 Hz, 2H), 2.13 (s, 3H).

**<sup>13</sup>C NMR (151 MHz, CDCl<sub>3</sub>)** δ 207.06, 153.79 (d, *J* = 242.1 Hz), 147.81 (d, *J* = 3.1 Hz), 136.35 (d, *J* = 11.1 Hz), 129.06 (d, *J* = 16.8 Hz), 118.76 (q, *J* = 320.4 Hz), 114.92 (d, *J* = 5.5 Hz), 110.41 (d, *J* = 27.7 Hz), 56.68, 43.21, 29.95, 23.44 (d, *J* = 1.9 Hz).

**<sup>19</sup>F NMR (565 MHz, CDCl<sub>3</sub>)** δ -73.62, -124.62 (t, *J* = 7.7 Hz).

**HRMS (ESI):** Calculated for C<sub>12</sub>H<sub>12</sub>F<sub>4</sub>O<sub>5</sub>S (M+H)<sup>+</sup>: 345.04142; found: 345.04071

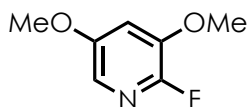

**2-Fluoro-3,5-dimethoxybenzimidazole (26)** The title compound was prepared from 3,5-dimethoxybenzimidazole according to **General Method A** with an irradiation time of 24 h. The crude mixture was purified via flash LC with (20% acetonitrile:water to 30% acetonitrile:water with 0.1% TFA) to afford a yellow oil (2.5 mg, 6.5%).

**<sup>1</sup>H NMR (600 MHz, CDCl<sub>3</sub>)** δ 7.32 (t, *J* = 2.7 Hz, 1H), 6.87 (dd, *J* = 8.4, 2.6 Hz, 1H), 3.87 (s, 3H), 3.85 (s, 3H).

**<sup>13</sup>C NMR (151 MHz, CDCl<sub>3</sub>)** δ 154.75 (d, *J* = 3.3 Hz), 148.20 (d, *J* = 232.0 Hz), 143.16 (d, *J* = 29.2 Hz), 119.85 (d, *J* = 14.2 Hz), 110.54 (d, *J* = 4.3 Hz).

**<sup>19</sup>F NMR (376 MHz, CDCl<sub>3</sub>)** δ -92.72 (d, *J* = 8.4 Hz).

**HRMS (ESI):** Calculated for C<sub>7</sub>H<sub>8</sub>FNO<sub>2</sub> (M+H)<sup>+</sup>: 158.06118; found: 158.06084.

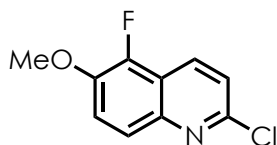

**2-Chloro-5-fluoro-6-methoxyquinoline (27)** The title compound was prepared from 2-chloro-6-methoxyquinoline according to **General Method A** with an irradiation time of 24 h. The crude mixture was purified via flash LC with (20% acetonitrile:water to 30% acetonitrile:water with 0.1% TFA) to afford a yellow oil (2.5 mg, 5%)

**<sup>1</sup>H NMR (700 MHz, CDCl<sub>3</sub>)** δ 8.32 (dd, *J* = 8.8, 0.8 Hz, 1H), 7.83 – 7.76 (m, 1H), 7.54 (t, *J* = 9.0 Hz, 1H), 7.40 (d, *J* = 8.8 Hz, 1H), 4.05 (s, 3H).

**<sup>13</sup>C NMR (176 MHz, CDCl<sub>3</sub>)** δ 149.57, 145.56 (d, *J* = 252.7 Hz), 143.92 (d, *J* = 9.3 Hz), 142.75 (d, *J* = 1.4 Hz), 131.45 (d, *J* = 4.5 Hz), 124.75 (d, *J* = 4.4 Hz), 122.88 (d, *J* = 2.7 Hz), 119.66 (d, *J* = 2.5 Hz), 118.47 (d, *J* = 13.9 Hz).

**<sup>19</sup>F NMR (376 MHz, CDCl<sub>3</sub>)** δ -144.92 (d, *J* = 8.4 Hz).

**HRMS (ESI):** Calculated for C<sub>10</sub>H<sub>7</sub>ClFNO (M+H)<sup>+</sup>: 212.02729; found: 212.02690.

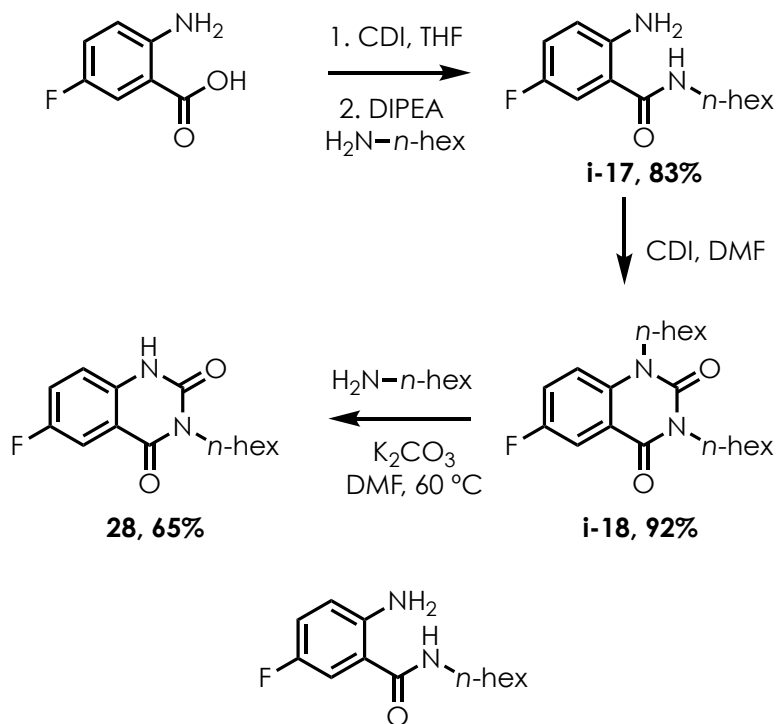

**2-Amino-5-fluoro-*N*-hexylbenzamide (i-17)** To a dry, clean round bottomed flask equipped with a stir bar was added 2-amino-5-fluorobenzoic acid (1.86 g, 12.0 mmol, 1.0 eq.), which was then dissolved in THF (24 mL) under N<sub>2</sub>. Carbonyldiimidazole (2.05 g, 12.6 mmol, 1.05 eq.) was then added to the reaction mixture and the suspension was allowed to stir for 30 min. *N,N*-Diisopropylethylamine (2.5 mL, 14.4 mmol, 1.2 eq.) and *n*-hexylamine (1.7 mL, 13.2 mmol, 1.1 eq.) were then sequentially added to the reaction mixture and the reaction was allowed to stir overnight (done in about 5-6 h.). At the end of the reaction, the mixture was quenched with 1 N HCl (15 mL) and diluted with EtOAc (20 mL) before the pH was adjusted to 7 with 2 M NaOH. The layers were separated and the aqueous layer was extracted once with 10 mL of EtOAc. The organic layers were then combined, washed consecutively with saturated NaHCO<sub>3</sub> solution and brine, dried over Na<sub>2</sub>SO<sub>4</sub> and concentrated. The crude product was purified via flash chromatography (30 to 50% EtOAc:Hex) to yield 2-amino-5-fluoro-*N*-hexylbenzamide as a pale yellow solid (2.38 g, 83%).

**<sup>1</sup>H NMR (600 MHz, CDCl<sub>3</sub>)** δ 7.01 (dd, *J* = 9.2, 2.9 Hz, 1H), 6.95 (ddd, *J* = 8.9, 7.9, 2.9 Hz, 1H), 6.63 (dd, *J* = 8.9, 4.7 Hz, 1H), 5.98 (s, 1H), 5.25 (s, 2H), 3.39 (td, *J* = 7.2, 5.7 Hz, 2H), 1.66 – 1.53 (m, 3H), 1.45 – 1.23 (m, 6H), 0.97 – 0.80 (m, 3H).

**<sup>13</sup>C NMR (151 MHz, CDCl<sub>3</sub>)** δ 168.38 (d, *J* = 2.3 Hz), 154.64 (d, *J* = 236.0 Hz), 144.85, 119.50 (d, *J* = 22.5 Hz), 118.56 (d, *J* = 7.1 Hz), 117.09 (d, *J* = 5.4 Hz), 113.10 (d, *J* = 22.7 Hz), 39.99, 31.64, 29.72, 26.83, 22.71, 14.16.

**<sup>19</sup>F NMR (376 MHz, CDCl<sub>3</sub>)** δ -127.59 (dt, *J* = 8.3, 4.3 Hz).

**HRMS (ESI):** Calculated for C<sub>13</sub>H<sub>19</sub>FN<sub>2</sub>O (M+H)<sup>+</sup>: 239.15541; found: 239.15467.

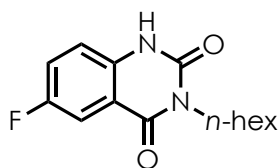

**6-Fluoro-3-hexylquinazoline-2,4(1*H*,3*H*)-dione (i-18)** To a dry, clean round bottomed flask equipped with a stir bar was added 2-amino-5-fluoro-*N*-hexylbenzamide (2.38 g, 10.0 mmol, 1.0 eq.), which was then dissolved in DMF (20 mL) under N<sub>2</sub>. Carbonyldiimidazole (2.11 g, 13.0 mmol, 1.30 eq.) was then added to the reaction mixture and the suspension was allowed to stir overnight. At the end of the reaction, the mixture was diluted with EtOAc (30 mL) and DI H<sub>2</sub>O (40 mL). The layers were separated and the aqueous layer extracted twice with EtOAc (2 x 15 mL). The organic layers were then combined, washed sequentially with 20% LiCl solution (twice) and brine, dried over MgSO<sub>4</sub> and concentrated to yield 6-fluoro-3-hexylquinazoline-2,4(1*H*,3*H*)-dione as a pale, off-white solid (2.44 g, 92%) that was analytically pure by <sup>1</sup>H and <sup>13</sup>C NMR. The crude product was carried onto the next synthetic step without further purification.

**<sup>1</sup>H NMR (600 MHz, CDCl<sub>3</sub>)** δ 10.93 (s, 1H), 7.79 (dd, *J* = 8.3, 2.9 Hz, 1H), 7.35 (td, *J* = 8.4, 2.9 Hz, 1H), 7.15 (dd, *J* = 8.8, 4.0 Hz, 1H), 4.11 – 4.03 (m, 2H), 1.77 – 1.60 (m, 2H), 1.45 – 1.37 (m, 2H), 1.37 – 1.26 (m, 4H), 0.89 (t, *J* = 6.9 Hz, 3H).

**<sup>13</sup>C NMR (151 MHz, CDCl<sub>3</sub>)** δ 161.70 (d, *J* = 2.9 Hz), 158.67 (d, *J* = 244.1 Hz), 152.32, 135.23, 123.16 (d, *J* = 24.4 Hz), 117.07 (d, *J* = 7.6 Hz), 115.89 (d, *J* = 7.8 Hz), 113.82 (d, *J* = 24.2 Hz), 41.41, 31.62, 27.93, 26.74, 22.68, 14.19.

**<sup>19</sup>F NMR (376 MHz, CDCl<sub>3</sub>)** δ -117.93 (td, *J* = 8.1, 4.1 Hz).

**HRMS (ESI):** Calculated for C<sub>14</sub>H<sub>17</sub>FN<sub>2</sub>O<sub>2</sub> (M+H)<sup>+</sup>: 265.13468; found: 265.13404.

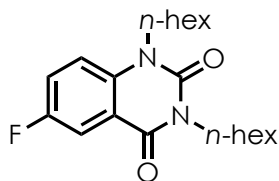

**6-Fluoro-1,3-dihexylquinazoline-2,4(1*H*,3*H*)-dione (28)** To a dry, clean round bottomed flask equipped with a stir bar was added 6-fluoro-3-hexylquinazoline-2,4(1*H*,3*H*)-dione (2.44 g, 9.20 mmol, 1.0 eq.) and potassium carbonate (6.36 g, 46 mmol, 5.0 eq.). The solids were dissolved in DMF (28 mL) under N<sub>2</sub> before 1-bromohexane (3.9 mL, 27.6 mmol, 3.0 eq.) was added dropwise. The reaction was then heated to 60 °C and stirred overnight. At the end of the reaction, the mixture was diluted with ether (30 mL) and DI H<sub>2</sub>O (40 mL). The layers were separated and the aqueous layer extracted twice with ether (2 x 15 mL). The organic layers were then combined, washed sequentially with 20% LiCl solution and brine, dried over MgSO<sub>4</sub> and concentrated. The crude product was purified via flash chromatography (5 to 10% EtOAc:Hex) to yield 6-fluoro-1,3-dihexylquinazoline-2,4(1*H*,3*H*)-dione as an off-white solid (2.08 g, 65%).

**<sup>1</sup>H NMR (600 MHz, CDCl<sub>3</sub>)** δ 7.86 (dd, *J* = 8.2, 3.1 Hz, 1H), 7.35 (ddd, *J* = 9.3, 7.6, 3.1 Hz, 1H), 7.13 (dd, *J* = 9.2, 3.9 Hz, 1H), 4.10 – 3.99 (m, 4H), 1.74 – 1.59 (m, 4H), 1.47 – 1.15 (m, 12H), 0.86 (dt, *J* = 11.6, 6.9 Hz, 6H).

**<sup>13</sup>C NMR (151 MHz, CDCl<sub>3</sub>)** δ 160.90 (d, *J* = 2.7 Hz), 158.16 (d, *J* = 244.1 Hz), 136.34 (d, *J* = 1.7 Hz), 122.63 (d, *J* = 24.0 Hz), 117.15 (d, *J* = 7.6 Hz), 115.50 (d, *J* = 7.3 Hz), 114.61 (d, *J* = 23.8 Hz), 44.15, 42.24, 31.58, 31.54, 27.81, 27.35, 26.73, 26.54, 22.65, 22.64, 14.11, 14.06.

**<sup>19</sup>F NMR (376 MHz, CDCl<sub>3</sub>)** δ -119.59 (td, *J* = 7.9, 4.0 Hz).

**HRMS (ESI):** Calculated for C<sub>20</sub>H<sub>29</sub>FN<sub>2</sub>O<sub>2</sub> (M+H)<sup>+</sup>: 349.2291; found: 349.2280.

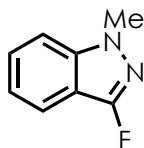

**3-fluoro-1-methyl-1H-indazole (26)** The title compound was prepared according to a published procedure; spectra data are in agreement with literature values. (68)

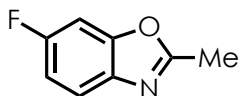

**6-fluoro-2-methylbenzo[d]oxazole** The title compound was prepared according to a published procedure (69); spectra data are in agreement with literature values. (70)

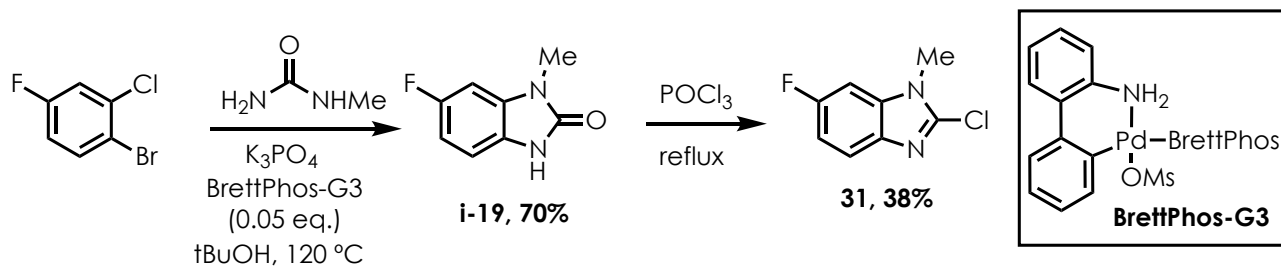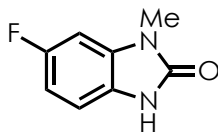

**6-fluoro-1-methyl-1,3-dihydro-2H-benzo[d]imidazol-2-one (i-19)** The title compound was prepared by adapting a procedure from Buchwald *et al.* (71). An oven-dried test tube equipped with a magnetic stir bar and a Teflon screw-cap was charged with BrettPhos-G3 (22.7 mg, 25.0  $\mu$ mol, 0.05 eq.), 1-methylurea (92.60 mg, 1.25 mmol, 2.5 eq.) and  $K_3PO_4$  (254.7 mg, 1.2 mmol, 2.4 eq.). The tube was evacuated and backfilled with nitrogen (repeated two additional times). *t*-BuOH (2 mL) and 1-bromo-2-chloro-4-fluorobenzene (59.8  $\mu$ L, 0.500 mmol, 1.0 eq.) were sequentially added via syringe and the punctured cap was replaced with a new one under a stream of nitrogen. The test tube was placed in a preheated oil bath at 110 °C and stirred for 14 h. After cooling to room temperature, the mixture was diluted with EtOAc (5 mL), filtered through a short silica plug (EtOAc rinse) and concentrated using a rotary evaporator. The residue was purified using silica gel chromatography (50 to 80% EtOAc:Hex) to afford 6-fluoro-1-methyl-1,3-dihydro-2H-benzo[d]imidazol-2-one as a white solid (58.5 mg, 70%).

**$^1H$  NMR (600 MHz, MeOD)**  $\delta$  7.00 (dd,  $J$  = 8.6, 4.4 Hz, 1H), 6.94 (s, 1H), 6.83 – 6.76 (m, 1H), 3.37 (s, 3H), 2.12 (t,  $J$  = 2.3 Hz, 1H).

**$^{13}C$  NMR (151 MHz, MeOD)**  $\delta$  160.13 (d,  $J$  = 236.1 Hz), 157.40, 133.05 (d,  $J$  = 12.5 Hz), 125.62, 110.66 (d,  $J$  = 9.4 Hz), 108.79 (d,  $J$  = 24.3 Hz), 97.17 (d,  $J$  = 29.1 Hz), 27.18.

**$^{19}F$  NMR (376 MHz, MeOD)**  $\delta$  -123.16 (td,  $J$  = 9.3, 4.5 Hz).

**HRMS (ESI):** Calculated for  $C_8H_7FN_2O$  ( $M+H$ ) $^+$ : 167.06151; found: 167.06227

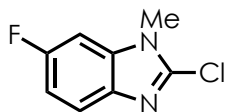

**2-chloro-6-fluoro-1-methyl-1H-benzo[d]imidazole (31)** The title compound was synthesized according to a published procedure (72); the compound was purified via flash chromatography (20 to 30% EtOAc:Hex) with basic aluminum oxide as the stationary phase (substrate: 91.5 mg, 0.55 mmol; product: 38.3 mg, 38%)

**<sup>1</sup>H NMR (850 MHz, CDCl<sub>3</sub>)** δ 7.65 (dd, *J* = 8.8, 4.6 Hz, 1H), 7.14 – 6.94 (m, 2H), 3.78 (s, 3H).

**<sup>13</sup>C NMR (214 MHz, CDCl<sub>3</sub>)** δ 160.12 (d, *J* = 241.7 Hz), 141.01s, 137.34, 135.61 (d, *J* = 13.1 Hz), 120.31 (d, *J* = 9.9 Hz), 111.60 (d, *J* = 25.0 Hz), 96.63 (d, *J* = 27.9 Hz), 31.05.

**<sup>19</sup>F NMR (376 MHz, CDCl<sub>3</sub>)** δ -117.17.

**HRMS (ESI):** Calculated for C<sub>8</sub>H<sub>6</sub>ClFN<sub>2</sub> (M+H)<sup>+</sup>: 185.02848; found: 185.02762

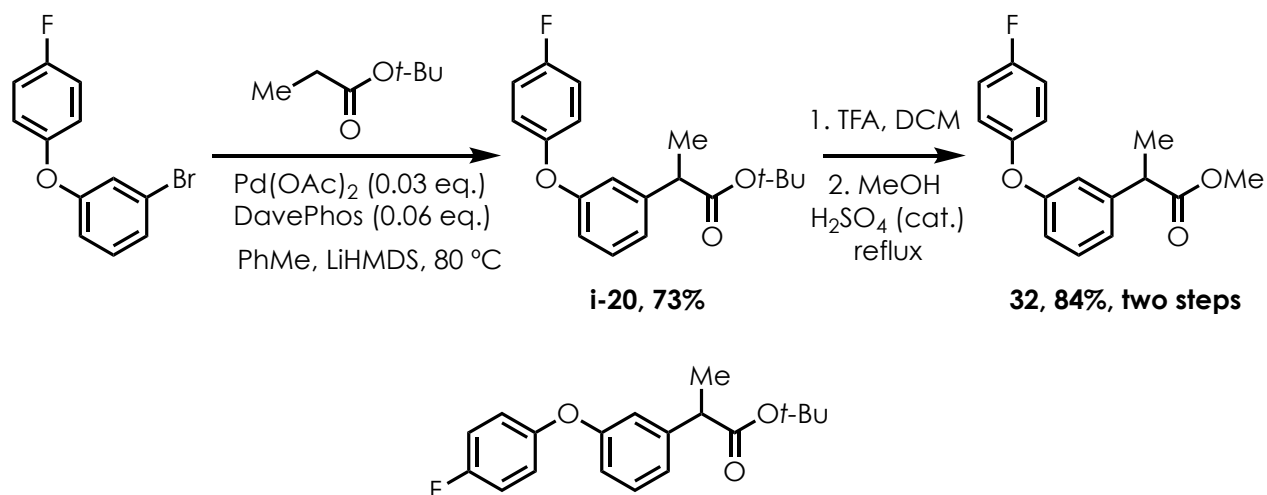

***Tert*-butyl 2-(3-(4-fluorophenoxy)phenyl)propanoate (i-20)** To a clean, dry 3-neck round bottomed flask equipped with a stir bar and a condenser were added palladium (II) acetate (33.7 mg, 0.15 mmol, 0.03 eq.) and 2-dicyclohexylphosphino-2'-(*N,N*-dimethylamino)biphenyl (DavePhos, 118.1 mg, 0.30 mmol, 0.06 eq.) under an inert atmosphere. The flask was sealed with rubber septa and placed under a positive N<sub>2</sub> pressure. The solids were then dissolved in PhMe (15 mL) and stirred for 15 min. before a solution of lithium bis(trimethylsilyl)amide (1.0 M in hexanes, 12.5 mL, 12.5 mmol, 2.5 eq.) was added dropwise. The reaction was stirred for an additional 15 minutes before it was cooled to -10 °C. *Tert*-butyl propionate (1.7 mL, 11.5 mmol, 2.3 eq.) was then added dropwise to the reaction mixture and stirred for an additional 10 minutes. 1-Bromo-3-(4-fluorophenoxy)benzene (0.90 mL, 5.00 mmol, 1.0 eq.) was then added dropwise and the reaction was allowed to warm to room temperature before being heated to 80 °C and stirred overnight. At the end of the reaction, the reaction mixture was filtered through a silica plug and concentrated to yield a liquid. The crude product was then purified via flash chromatography (2 to 5% EtOAc:Hex) to yield *tert*-butyl 2-(3-(4-fluorophenoxy)phenyl)propanoate as a yellow liquid (1.15 g, 73%).

**<sup>1</sup>H NMR (600 MHz, CDCl<sub>3</sub>)** δ 7.28 (t, *J* = 7.9 Hz, 1H), 7.07 – 7.01 (m, 3H), 7.02 – 6.96 (m, 2H), 6.95 (t, *J* = 2.2 Hz, 1H), 6.86 (dd, *J* = 8.2, 2.7 Hz, 1H), 3.60 (q, *J* = 7.2 Hz, 1H), 1.45 (d, *J* = 7.2 Hz, 3H), 1.41 (s, 9H).

**<sup>13</sup>C NMR (151 MHz, CDCl<sub>3</sub>)** δ 173.48, 158.91 (d, *J* = 241.6 Hz), 157.84, 153.01 (d, *J* = 2.5 Hz), 143.35, 129.84, 122.38, 120.59 (d, *J* = 8.2 Hz), 117.57, 116.80, 116.37 (d, *J* = 23.2 Hz), 80.70, 46.46, 28.01, 18.48.

**<sup>19</sup>F NMR (376 MHz, CDCl<sub>3</sub>)** δ -120.14 (td, *J* = 8.0, 4.1 Hz).

**HRMS (ESI):** Calculated for C<sub>19</sub>H<sub>21</sub>FO<sub>3</sub> (M+H)<sup>+</sup>: 317.1553; found: 317.1557.

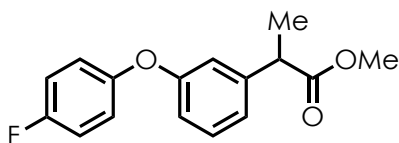

**Methyl 2-(3-(4-fluorophenoxy)phenyl)propanoate (32)** To a clean, dry round bottomed flask equipped with a stir bar was added *tert*-butyl 2-(3-(4-fluorophenoxy)phenyl)propanoate (1.15 g, 3.63 mmol, 1.0 eq.), which was then dissolved in 8.6 mL of DCM. Trifluoroacetic acid (8.6 mL) was then added to the solution and the reaction was stirred for 2 h. At the end of the reaction, the mixture was concentrated under reduced pressure and reconstituted in 10 mL of DCM. TLC analysis suggested full conversion to the desired product, thus the crude was then re-concentrated to remove excess trifluoroacetic acid and was carried forward to the esterification without further purification. The dry crude was then dissolved in 10 mL of dry MeOH under N<sub>2</sub> and a catalytic amount of sulfuric acid was added to the solution. The reaction was then refluxed for 3 h. At the end of the reaction, the solution was concentrated, diluted with ether and neutralized with saturated NaHCO<sub>3</sub> solution. The layers were then separated and the aqueous layer was extracted once with 10 mL of ether. The organic layers were combined, washed with brine, dried over Na<sub>2</sub>SO<sub>4</sub> and concentrated. The crude product was purified via column chromatography (5 to 15% EtOAc:Hex) to yield methyl 2-(3-(4-fluorophenoxy)phenyl)propanoate as a colorless liquid (0.851 g, 84%)

**<sup>1</sup>H NMR (600 MHz, CDCl<sub>3</sub>)** δ 7.26 (t, *J* = 7.9 Hz, 1H), 7.05 – 7.00 (m, 3H), 7.00 – 6.96 (m, 2H), 6.96 – 6.94 (m, 1H), 6.83 (ddd, *J* = 8.2, 2.5, 1.0 Hz, 1H), 3.70 (q, *J* = 7.2 Hz, 1H), 3.66 (s, 3H), 1.49 (d, *J* = 7.2 Hz, 3H).

**<sup>13</sup>C NMR (151 MHz, CDCl<sub>3</sub>)** δ 174.68, 158.96 (d, *J* = 241.7 Hz), 157.98, 152.75 (d, *J* = 2.6 Hz), 142.68, 129.97, 122.28, 120.70 (d, *J* = 8.3 Hz), 117.61, 116.74, 116.39 (d, *J* = 23.2 Hz), 52.14, 45.34, 18.58.

**<sup>19</sup>F NMR (376 MHz, CDCl<sub>3</sub>)** δ -119.87 (ddd, *J* = 12.3, 8.0, 4.6 Hz).

**HRMS (ESI):** Calculated for C<sub>16</sub>H<sub>15</sub>FO<sub>3</sub> (M+H)<sup>+</sup>: 275.1083; found: 275.1073.

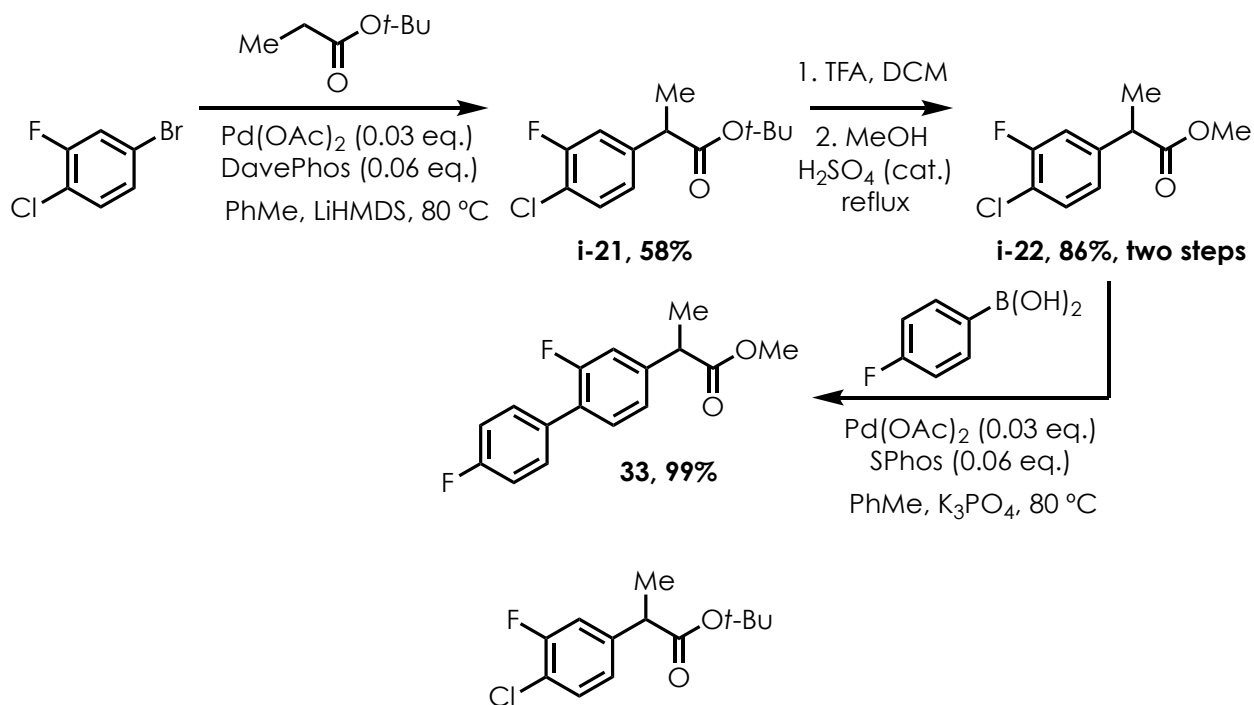

***Tert*-butyl 2-(4-chloro-3-fluorophenyl)propanoate (i-21)** To a clean, dry 3-neck round bottomed flask equipped with a stir bar and a condenser were added palladium (II) acetate (33.7 mg, 0.15 mmol, 0.03 eq.), 2-dicyclohexylphosphino-2'-(*N,N*-dimethylamino)biphenyl (DavePhos, 118.1 mg, 0.30 mmol, 0.06 eq.), and lithium bis(trimethylsilyl)amide (2.09 g, 12.5 mmol, 2.5 eq.) under an inert atmosphere. The flask was sealed with rubber septa and placed under a positive N<sub>2</sub> pressure. The solids were then dissolved in PhMe (15 mL) and stirred for 15 min. at room temperature before the solution was cooled to -10 °C. *Tert*-butyl propionate (1.7 mL, 11.5 mmol, 2.3 eq.) was then added dropwise to the reaction mixture and stirred for an additional 10 minutes. 4-bromo-1-chloro-2-fluorobenzene (0.61 mL, 5.00 mmol, 1.0 eq.) was then added dropwise and the reaction was allowed to warm to room temperature before being heated to 80 °C and stirred overnight. At the end of the reaction, the reaction mixture was filtered through a silica plug and concentrated to yield a liquid. The crude product was then purified via flash chromatography (5 to 10% DCM:Hex) to yield *tert*-butyl 2-(4-chloro-3-fluorophenyl)propanoate as a pale yellow liquid (0.760 g, 58%).

**<sup>1</sup>H NMR (600 MHz, CDCl<sub>3</sub>)** δ 7.31 (t, *J* = 8.0 Hz, 1H), 7.10 (dd, *J* = 10.2, 2.1 Hz, 1H), 7.01 (dd, *J* = 8.4, 2.1 Hz, 1H), 3.57 (q, *J* = 7.2 Hz, 1H), 1.42 (d, *J* = 7.2 Hz, 3H), 1.39 (s, 9H).

**<sup>13</sup>C NMR (151 MHz, CDCl<sub>3</sub>)** δ 172.96, 158.10 (d, *J* = 248.6 Hz), 142.07 (d, *J* = 6.6 Hz), 130.55, 124.09 (d, *J* = 3.7 Hz), 119.43 (d, *J* = 17.6 Hz), 115.85 (d, *J* = 21.5 Hz), 81.16, 45.97 (d, *J* = 1.6 Hz), 27.99, 18.42.

**<sup>19</sup>F NMR (376 MHz, CDCl<sub>3</sub>)** δ -118.27 (dd, *J* = 10.1, 7.7 Hz).

**HRMS (ESI):** Calculated for C<sub>13</sub>H<sub>16</sub>ClFO<sub>2</sub> (M+H)<sup>+</sup>: 259.08956; found: 259.15081.

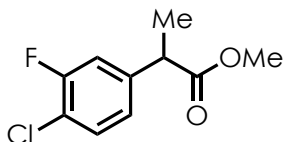

**Methyl 2-(4-chloro-3-fluorophenyl)propanoate (i-22)** To a clean, dry round bottomed flask equipped with a stir bar was added *tert*-butyl 2-(4-chloro-3-fluorophenyl)propanoate (0.648 g, 2.50

mmol, 1.0 eq.), which was then dissolved in 5.9 mL of DCM. Trifluoroacetic acid (5.9 mL) was then added to the solution and the reaction was stirred for 2 h. At the end of the reaction, the mixture was concentrated under reduced pressure and reconstituted in 10 mL of DCM. TLC analysis suggested full conversion to the desired product, thus the crude was then re-concentrated to remove excess trifluoroacetic acid and was carried forward to the esterification without further purification. The dry crude was then dissolved in 10 mL of dry MeOH under N<sub>2</sub> and a catalytic amount of sulfuric acid was added to the solution. The reaction was then refluxed for 3 h. At the end of the reaction, the solution was concentrated, diluted with ether and neutralized with saturated NaHCO<sub>3</sub> solution. The layers were then separated and the aqueous layer was extracted once with 10 mL of ether. The organic layers were combined, washed with brine, dried over Na<sub>2</sub>SO<sub>4</sub> and concentrated. The crude product was purified via column chromatography (5 to 10% DCM:Hex) to yield methyl 2-(4-chloro-3-fluorophenyl)propanoate as a colorless liquid (0.468 g, 86%).

**<sup>1</sup>H NMR (600 MHz, CDCl<sub>3</sub>)** δ 7.31 (td, *J* = 7.8, 1.7 Hz, 1H), 7.10 (dt, *J* = 10.0, 1.7 Hz, 1H), 7.02 (dd, *J* = 8.3, 2.1 Hz, 1H), 3.69 (q, *J* = 7.3 Hz, 1H), 3.66 (t, *J* = 1.2 Hz, 3H), 1.47 (dd, *J* = 7.2, 1.5 Hz, 3H).

**<sup>13</sup>C NMR (151 MHz, CDCl<sub>3</sub>)** δ 174.14, 158.12 (d, *J* = 248.8 Hz), 141.32 (d, *J* = 6.5 Hz), 130.69, 124.14 (d, *J* = 3.7 Hz), 119.75 (d, *J* = 17.6 Hz), 115.93 (d, *J* = 21.5 Hz), 52.31, 44.82, 18.44.

**<sup>19</sup>F NMR (376 MHz, CDCl<sub>3</sub>)** δ -114.86 (ddd, *J* = 11.0, 7.7, 3.4 Hz).

**HRMS (ESI):** Calculated for C<sub>10</sub>H<sub>10</sub>ClFO<sub>2</sub> (M+H)<sup>+</sup>: 217.04261; found: 217.04216.

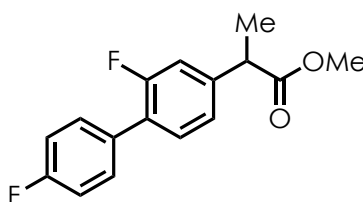

**Methyl 2-(2,4'-difluoro-[1,1'-biphenyl]-4-yl)propanoate (33)** To a clean, dry 2 dram vial equipped with a stir bar was added potassium phosphate tribasic (212.3 mg, 1.00 mmol, 2.0 eq.) and (4-fluorophenyl)boronic acid (70.0 mg, 0.500 mmol, 1.0 eq.). The vial was then brought into the glovebox (N<sub>2</sub>), where palladium (II) acetate (2.3 mg, 10.0 μmol, 0.02 eq.) and dicyclohexyl(2',6'-dimethoxy-[1,1'-biphenyl]-2-yl)phosphine (SPhos, 8.2 mg, 20.0 μmol, 0.04 eq.) were added consecutively to the solids. Dry toluene (1 mL) was added, the vial was then sealed with a septum cap and the reaction was stirred for approximately 2 min. before the addition of methyl 2-(4-chloro-3-fluorophenyl)propanoate (108.3 mg, 88.9 μL, 0.500 mmol, 1.0 eq.). The vial was resealed with the septum cap, brought out of the glovebox and heated at 90 °C for 19 h. At the end of the reaction, the the vial was cooled to room temperature before being diluted with ether (10 mL), filtered through a silica plug and concentrated to yield a liquid. The crude product was then purified via flash chromatography (20 to 30% DCM:Hex) to yield methyl 2-(2,4'-difluoro-[1,1'-biphenyl]-4-yl)propanoate as a colorless liquid (136 mg, 99%).

**<sup>1</sup>H NMR (600 MHz, CDCl<sub>3</sub>)** δ 7.50 (ddt, *J* = 6.9, 5.4, 1.6 Hz, 2H), 7.35 (t, *J* = 8.0 Hz, 1H), 7.16 – 7.10 (m, 4H), 3.76 (q, *J* = 7.2 Hz, 1H), 3.70 (s, 3H), 1.54 (d, *J* = 7.2 Hz, 3H).

**<sup>13</sup>C NMR (151 MHz, CDCl<sub>3</sub>)** δ 174.53, 162.55 (d, *J* = 247.2 Hz), 159.71 (d, *J* = 248.1 Hz), 142.07 (d, *J* = 7.5 Hz), 131.56 (d, *J* = 3.3 Hz), 130.78 (d, *J* = 3.9 Hz), 130.71 (dd, *J* = 8.1, 3.1 Hz), 126.97 (d, *J* = 13.4 Hz), 123.72 (d, *J* = 3.6 Hz), 115.54 (d, *J* = 21.5 Hz), 115.42 (d, *J* = 23.4 Hz), 52.36, 45.02, 18.54.

**<sup>19</sup>F NMR (376 MHz, CDCl<sub>3</sub>)** δ -114.44 (ddd, *J* = 14.2, 8.8, 5.2 Hz), -117.61 (dd, *J* = 11.5, 8.1 Hz).

**HRMS (ESI):** Calculated for C<sub>16</sub>H<sub>14</sub>F<sub>2</sub>O<sub>2</sub> (M+H)<sup>+</sup>: 277.07899; found: 277.08288.

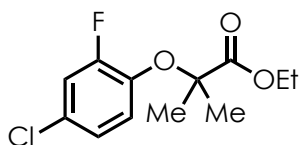

**Ethyl 2-(4-chloro-2-fluorophenoxy)-2-methylpropanoate (34)** To a dry, clean 3-neck round bottomed flask equipped with a condenser and a stir bar was added potassium carbonate (1.73 g, 12.5 mmol, 2.5 eq.) and 4-chloro-2-fluorophenol (733 mg, 5.00 mmol, 1.0 eq.). The flask was then sealed with rubber septa and the solids were then dissolved in DMF (10 mL) under N<sub>2</sub>. Ethyl 2-bromo-2-methylpropanoate (1.47 mL, 10.0 mmol, 2.0 eq.) was added dropwise via syringe and the reaction was heated to 70 °C overnight. At the end of the reaction, the reaction was cooled to room temperature before being diluted with ether (15 mL) and water (30 mL). The layers were separated and the aqueous layer was extracted twice with 10 mL of ether. The organic layers were combined, washed sequentially with 20% LiCl solution (15 mL) and brine (15 mL), dried over MgSO<sub>4</sub> and concentrated to yield a yellow oil. The crude product was then purified via flash chromatography (5-20% EtOAc:Hex) to yield ethyl 2-(4-chloro-2-fluorophenoxy)-2-methylpropanoate as an oil (0.885 g, 68%).

**<sup>1</sup>H NMR (600 MHz, CDCl<sub>3</sub>)** δ 7.07 (dd, *J* = 10.5, 2.5 Hz, 1H), 6.99 – 6.95 (m, 1H), 6.92 (t, *J* = 8.6 Hz, 1H), 4.22 (q, *J* = 7.2 Hz, 2H), 1.55 (d, *J* = 2.4 Hz, 6H), 1.26 (t, *J* = 7.3 Hz, 3H).

**<sup>13</sup>C NMR (151 MHz, CDCl<sub>3</sub>)** δ 173.46, 155.12 (d, *J* = 250.4 Hz), 141.92 (d, *J* = 11.1 Hz), 128.26 (d, *J* = 9.2 Hz), 124.23 (d, *J* = 3.8 Hz), 123.50 (d, *J* = 2.0 Hz), 117.29 (d, *J* = 22.8 Hz), 81.41, 61.64, 24.97, 14.15.

**<sup>19</sup>F NMR (376 MHz, CDCl<sub>3</sub>)** δ -119.87 – -135.56 (m).

**HRMS (ESI):** Calculated for C<sub>12</sub>H<sub>14</sub>ClFO<sub>3</sub> (M+H)<sup>+</sup>: 261.0688; found: 261.0682.

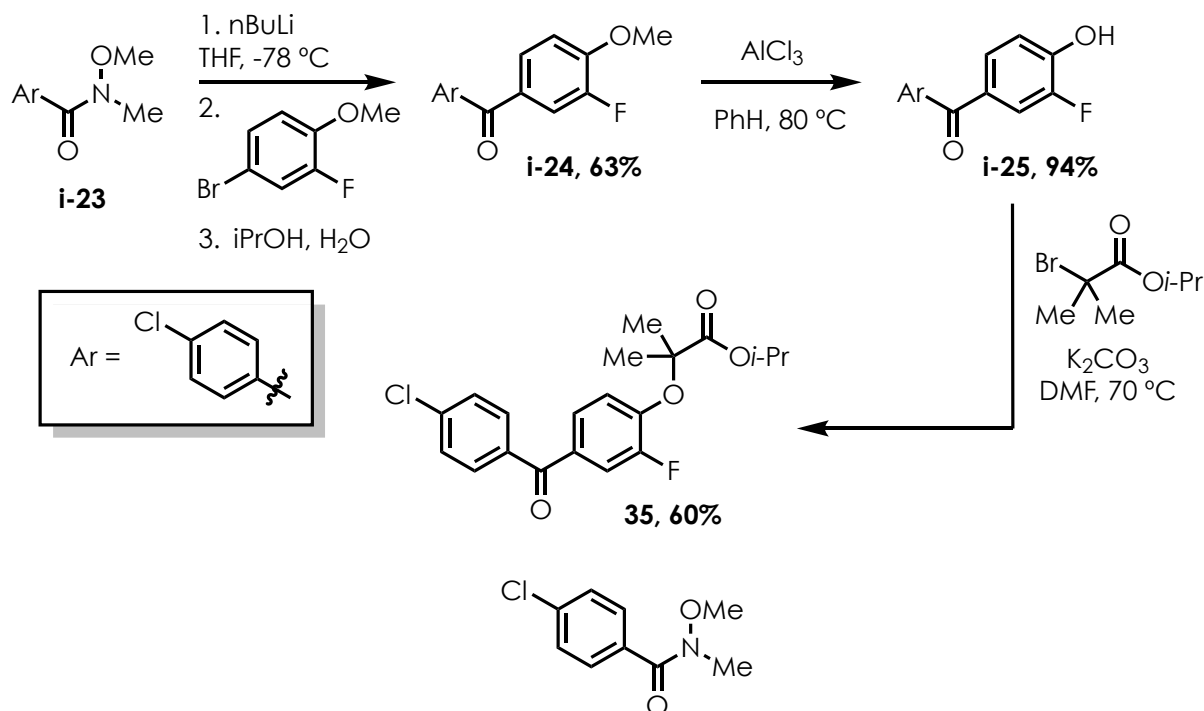

**4-Chloro-*N*-methoxy-*N*-methylbenzamide (i-23)** was prepared according to a published procedure; spectra data are in agreement with literature values. (73)

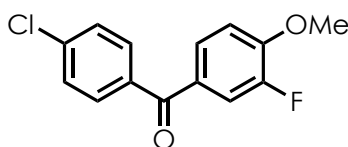

**(4-Chlorophenyl)(3-fluoro-4-methoxyphenyl)methanone (i-24)** To a clean, dry round-bottomed flask equipped with a stir bar was added 4-bromo-2-fluoroanisole (0.88 mL, 6.79 mmol, 0.91 eq.) under N<sub>2</sub>. Then THF (45 mL) was added and the reaction was cooled to -78 °C. A solution of nBuLi (2.5 M in hexanes, 3.0 mL, 7.48 mmol, 1.0 eq.) was added dropwise under positive N<sub>2</sub> pressure and the reaction was allowed to stir for 20 minutes. A solution of 4-chloro-*N*-methoxy-*N*-methylbenzamide (1.49 g, 7.49 mmol, 1.0 eq.) in THF (10 mL) was prepared and added dropwise to the aryllithium species under positive N<sub>2</sub> pressure. The solution was allowed to stir at -78 °C for 1.5 h and subsequently quenched at -78°C with *i*-PrOH (10 mL) and DI H<sub>2</sub>O (10 mL), and allowed to warm to room temperature. Ether (20 mL) and DI H<sub>2</sub>O (20 mL) were then added to the reaction mixture and the layers were separated. The aqueous layer was extracted with ether (10 mL x 2) and the organic layers were combined. The combined organic fractions were washed with brine, dried over Na<sub>2</sub>SO<sub>4</sub> and concentrated. The crude mixture was purified via flash chromatography (10 to 20% EtOAc:Hex) to yield 4-chlorophenyl(3-fluoro-4-methoxyphenyl)methanone as a white solid (1.25 g, 63%).

**<sup>1</sup>H NMR (600 MHz, CDCl<sub>3</sub>)** δ 7.72 – 7.68 (m, 2H), 7.62 – 7.54 (m, 2H), 7.48 – 7.45 (m, 2H), 7.02 (t, *J* = 8.4 Hz, 1H), 3.98 (s, 3H).

**<sup>13</sup>C NMR (151 MHz, CDCl<sub>3</sub>)** δ 151.98 (d, *J* = 248.6 Hz), 151.91 (d, *J* = 10.7 Hz), 138.83, 136.07, 131.27, 130.13 (d, *J* = 5.0 Hz), 128.82, 127.73 (d, *J* = 3.3 Hz), 117.86 (d, *J* = 19.1 Hz), 112.41 (d, *J* = 2.1 Hz), 56.50.

**<sup>19</sup>F NMR (376 MHz, CDCl<sub>3</sub>)** δ -133.81 – -133.89 (m).

**HRMS (ESI):** Calculated for C<sub>14</sub>H<sub>10</sub>ClFO<sub>2</sub> (M+H)<sup>+</sup>: 265.04261; found: 265.04216.

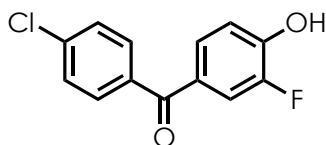

**(4-Chlorophenyl)(3-fluoro-4-hydroxyphenyl)methanone (i-25)** To a clean, dry 2-neck round bottomed flask equipped with a stir bar was added (4-chlorophenyl)(3-fluoro-4-methoxyphenyl)methanone (1.23 g, 4.63 mmol, 1.0 eq.), which was then dissolved in benzene (50 mL) under N<sub>2</sub>. Aluminum chloride (3.70 g, 27.8 mmol, 6.0 eq.) was then added in three portions to the solution and the reaction mixture was refluxed overnight. At the end of the reaction, the reaction was quenched with ice (approx. 10 g), and the layers were separated. The aqueous layer was extracted twice with DCM (10 mL) and the organic layers were combined. The organic fractions were then washed with saturated ammonium chloride solution, dried over MgSO<sub>4</sub> and concentrated. The crude product was purified via flash chromatography (30 to 40% EtOAc:Hex) to yield (4-chlorophenyl)(3-fluoro-4-hydroxyphenyl)methanone as a pink solid (1.10 g, 95%).

**<sup>1</sup>H NMR (600 MHz, Acetone-*d*<sub>6</sub>)** δ 9.64 (s, 1H), 7.80 – 7.71 (m, 2H), 7.61 – 7.56 (m, 3H), 7.53 (ddd, *J* = 8.3, 2.1, 0.9 Hz, 1H), 7.14 (t, *J* = 8.5 Hz, 1H).

**<sup>13</sup>C NMR (151 MHz, Acetone-*d*<sub>6</sub>)** δ 193.24 (d, *J* = 1.5 Hz), 151.91 (d, *J* = 243.0 Hz), 150.48 (d, *J* = 12.9 Hz), 138.60, 137.50, 132.10, 130.26 (d, *J* = 4.7 Hz), 129.49, 128.74 (d, *J* = 2.9 Hz), 118.49 (d, *J* = 19.3 Hz), 118.29 (d, *J* = 2.8 Hz).

**<sup>19</sup>F NMR (376 MHz, Acetone-*d*<sub>6</sub>)** δ -137.61 (dd, *J* = 11.7, 8.5 Hz).

**HRMS (ESI):** Calculated for  $C_{13}H_8ClFO_2$  ( $M+H$ )<sup>+</sup>: 251.02696; found: 251.02653.

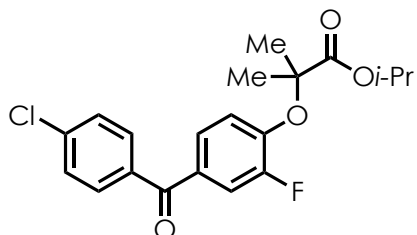

**Isopropyl 2-(4-(4-chlorobenzoyl)-2-fluorophenoxy)-2-methylpropanoate (35)** To a dry, clean 3-neck round bottomed flask equipped with a condenser and a stir bar was added potassium carbonate (1.49 g, 10.8 mmol, 2.5 eq.) and (4-chlorophenyl)(3-fluoro-4-hydroxyphenyl)methanone (1.08 mg, 4.31 mmol, 1.0 eq.). The flask was then sealed with rubber septa and the solids were then dissolved in DMF (10 mL) under  $N_2$ . Isopropyl 2-bromo-2-methylpropanoate (1.45 mL, 8.62 mmol, 2.0 eq.) was added dropwise via syringe and the reaction was heated to 70 °C overnight. At the end of the reaction, the reaction was cooled to room temperature before being diluted with ether (15 mL) and water (30 mL). The layers were separated and the aqueous layer was extracted twice with 10 mL of ether. The organic layers were combined, washed sequentially with 20% LiCl solution (15 mL) and brine (15 mL), dried over  $MgSO_4$  and concentrated to yield a pink-red solid. The crude product was then purified via flash chromatography (5-20% EtOAc:Hex) to yield isopropyl 2-(4-(4-chlorobenzoyl)-2-fluorophenoxy)-2-methylpropanoate as a pink-red solid (983 mg, 60%).

**$^1H$  NMR (600 MHz,  $CDCl_3$ )**  $\delta$  7.72 – 7.65 (m, 2H), 7.57 (dd,  $J$  = 11.3, 2.1 Hz, 1H), 7.48 – 7.42 (m, 3H), 6.92 (t,  $J$  = 8.2 Hz, 1H), 5.09 (hept,  $J$  = 6.3 Hz, 1H), 1.65 (s, 6H), 1.22 (d,  $J$  = 6.3 Hz, 6H).

**$^{13}C$  NMR (151 MHz,  $CDCl_3$ )**  $\delta$  193.31 (d,  $J$  = 1.4 Hz), 172.73, 153.63 (d,  $J$  = 248.9 Hz), 147.88 (d,  $J$  = 10.9 Hz), 138.89, 135.86, 131.44 (d,  $J$  = 5.4 Hz), 131.25, 128.80, 126.63 (d,  $J$  = 3.5 Hz), 119.16, 118.29 (d,  $J$  = 20.4 Hz), 81.12, 69.54, 25.28, 21.65.

**$^{19}F$  NMR (376 MHz,  $CDCl_3$ )**  $\delta$  -129.29 (dd,  $J$  = 11.4, 8.0 Hz).

**HRMS (ESI):** Calculated for  $C_{20}H_{20}ClFO_4$  ( $M+H$ )<sup>+</sup>: 379.11068; found: 379.10971.

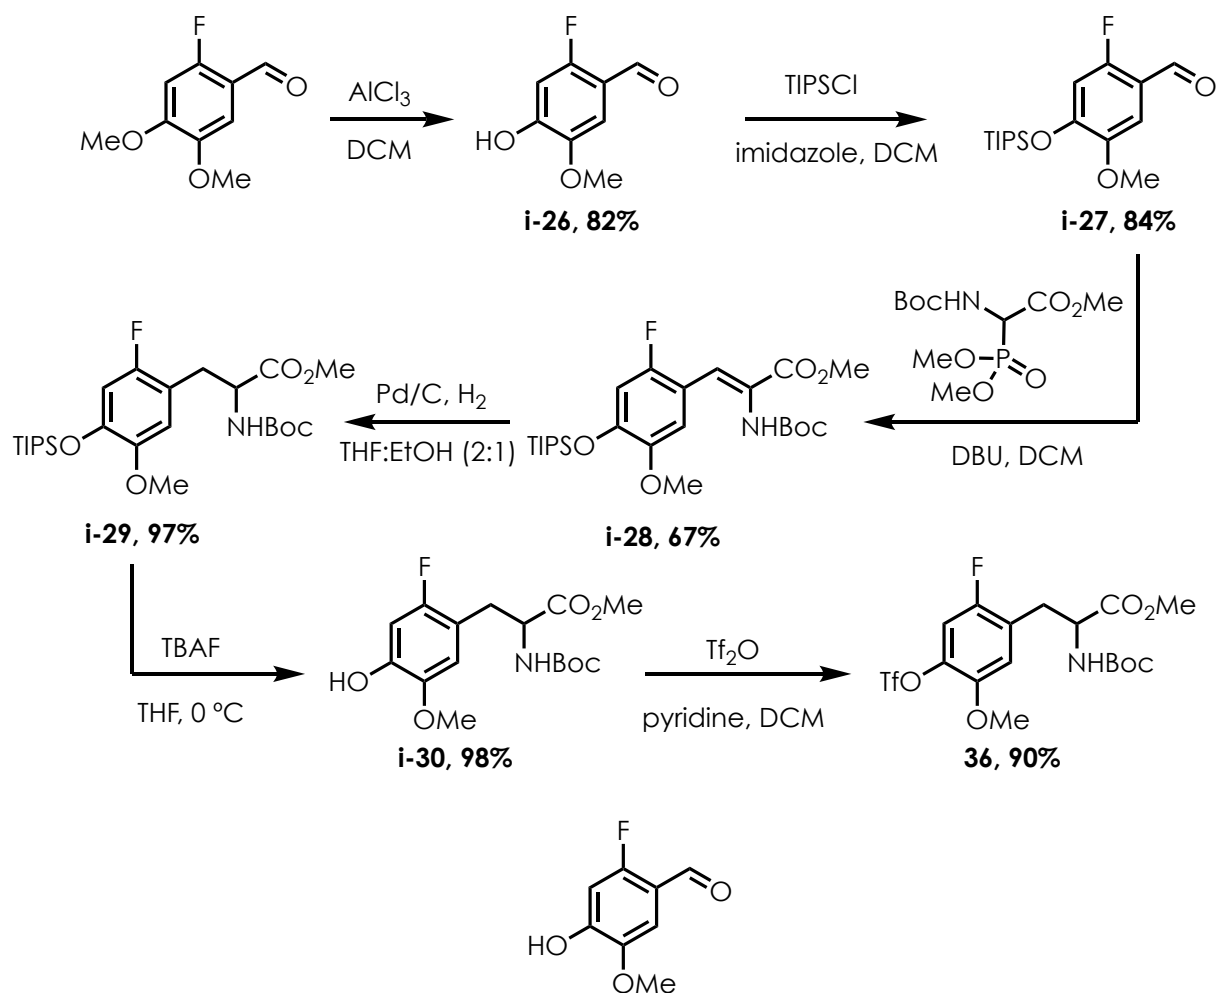

**2-Fluoro-4-hydroxy-5-methoxybenzaldehyde (i-26)** To a clean, dry round bottomed flask equipped with a stir bar was added 2-fluoro-4,5-dimethoxybenzaldehyde (1.04 g, 5.64 mmol, 1.0 eq.), which was then dissolved in 80 mL of DCM. Aluminum trichloride (4.51 g, 33.8 mmol, 6.0 eq.) was then added in three portions to the reaction mixture and the reaction was kept under  $\text{N}_2$  for 20 h. The reaction was then carefully poured into ice (caution: exothermic!) and stirred until all the ice was melted. The organic layer was then separated, dried over  $\text{MgSO}_4$ , concentrated and purified via flash chromatography (DCM to 10% EtOAc:DCM) to provide 2-fluoro-4-hydroxy-5-methoxybenzaldehyde (0.785 g, 82%) as a white solid and the isomeric 2-fluoro-5-hydroxy-4-methoxybenzaldehyde (97.0 mg, 10%) as a pale yellow solid.

**$^1\text{H}$  NMR (600 MHz,  $\text{CDCl}_3$ )**  $\delta$  10.21 (s, 1H), 7.29 (d,  $J$  = 6.1 Hz, 1H), 6.72 (d,  $J$  = 10.9 Hz, 1H), 6.35 (d,  $J$  = 1.4 Hz, 1H), 3.94 (s, 3H).

**$^{13}\text{C}$  NMR (151 MHz,  $\text{CDCl}_3$ )**  $\delta$  185.96 (d,  $J$  = 6.7 Hz), 161.63 (d,  $J$  = 253.0 Hz), 153.13 (d,  $J$  = 13.5 Hz), 143.79 (d,  $J$  = 2.1 Hz), 116.60 (d,  $J$  = 9.1 Hz), 107.63 (d,  $J$  = 3.4 Hz), 102.90 (d,  $J$  = 26.3 Hz), 56.61.

**$^{19}\text{F}$  NMR (376 MHz,  $\text{CDCl}_3$ )**  $\delta$  -128.30 (dt,  $J$  = 10.2, 4.7 Hz).

**HRMS (ESI):** Calculated for  $\text{C}_8\text{H}_7\text{FO}_3$  ( $\text{M}+\text{H}$ )<sup>+</sup>: 171.04250; found: 171.04477.

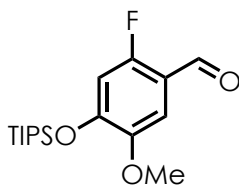

**2-Fluoro-5-methoxy-4-((triisopropylsilyl)oxy)benzaldehyde (i-27)** To a clean, dry round bottomed flask equipped with a stir bar was added 2-fluoro-4-hydroxy-5-methoxybenzaldehyde (681 mg, 4.00 mmol, 1.0 eq.) and imidazole (545 mg, 8.00 mmol, 2.0 eq.). The solids were dissolved in 20 mL of DCM under N<sub>2</sub> and the solution was cooled to 0 °C. Triisopropylsilyl chloride (1.0 mL, 4.80 mmol, 1.2 eq.) was then added to the reaction mixture dropwise and the reaction was then warmed to room temperature and stirred for 6 h. At the end of the reaction, the mixture was concentrated under reduced pressure, loaded onto Celite and purified via column chromatography (2 to 10% EtOAc:Hex) to yield a colorless oil (1.09 g, 84%).

**<sup>1</sup>H NMR (600 MHz, CDCl<sub>3</sub>)** δ 10.17 (d, *J* = 2.6 Hz, 1H), 7.24 (dd, *J* = 6.7, 1.9 Hz, 1H), 6.61 (dd, *J* = 11.3, 2.2 Hz, 1H), 3.80 (s, 3H), 1.25 (dt, *J* = 15.0, 7.5 Hz, 3H), 1.06 (dd, *J* = 7.6, 2.7 Hz, 18H).

**<sup>13</sup>C NMR (151 MHz, CDCl<sub>3</sub>)** δ 185.95 (d, *J* = 6.0 Hz), 160.76 (d, *J* = 253.4 Hz), 153.23 (d, *J* = 12.2 Hz), 148.31 (d, *J* = 2.1 Hz), 117.24 (d, *J* = 8.8 Hz), 108.42 (d, *J* = 3.7 Hz), 108.12 (d, *J* = 23.4 Hz), 55.81, 17.82, 12.96.

**<sup>19</sup>F NMR (376 MHz, CDCl<sub>3</sub>)** δ -129.93 (ddd, *J* = 10.7, 7.2, 3.4 Hz).

**HRMS (ESI):** Calculated for C<sub>17</sub>H<sub>27</sub>FO<sub>3</sub>Si (M+H)<sup>+</sup>: 327.17863; found: 327.17776.

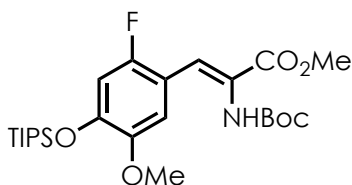

**Methyl (Z)-2-((tert-butoxycarbonyl)amino)-3-(2-fluoro-5-methoxy-4-((triisopropylsilyl)oxy)phenyl)acrylate (i-28)**

Methyl 2-((tert-butoxycarbonyl)amino)-2-(dimethoxyphosphoryl)acetate (1.08 g, 3.62 mmol, 1.2 eq.) was added to a flame dried round bottomed flask equipped with a stir bar and dissolved in 6 mL of dry DCM under N<sub>2</sub>. Then 1,8-diazabicyclo[5.4.0]undec-7-ene (0.46 mL, 3.02 mmol, 1.0 eq.) was added via syringe and the mixture was stirred at room temperature for 15 minutes. While the phosphonate ester solution was stirring, a solution of 2-fluoro-5-methoxy-4-((triisopropylsilyl)oxy)benzaldehyde (2.23 g, 7.23 mmol, 1.0 eq.) in 6 mL DCM was prepared. This benzaldehyde solution was added to the phosphonate ester solution dropwise at room temperature. Reaction conversion was monitored via TLC (reaction takes approximately 4 h.) and at the end of the reaction, the solution was concentrated and loaded onto Celite. The crude reaction mixture was then purified via flash chromatography (10 to 20% EtOAc) to yield methyl (Z)-2-((tert-butoxycarbonyl)amino)-3-(2-fluoro-5-methoxy-4-((triisopropylsilyl)oxy)phenyl)acrylate as a white solid (1.01 g, 67%).

**<sup>1</sup>H NMR (600 MHz, CDCl<sub>3</sub>)** δ 7.38 (s, 1H), 7.17 (d, *J* = 6.9 Hz, 1H), 6.61 (d, *J* = 11.2 Hz, 1H), 3.85 (s, 3H), 3.76 (s, 3H), 1.39 (s, 9H), 1.26 (dt, *J* = 14.9, 7.5 Hz, 3H), 1.09 (d, *J* = 7.5 Hz, 18H).

**<sup>13</sup>C NMR (151 MHz, CDCl<sub>3</sub>)** δ 166.14, 155.63 (d, *J* = 246.5 Hz), 148.10 (d, *J* = 11.8 Hz), 147.41, 122.76 (d, *J* = 4.3 Hz), 114.28 (d, *J* = 13.9 Hz), 111.77, 108.08 (d, *J* = 25.3 Hz), 81.02, 56.00, 52.74, 28.26, 17.96, 13.00.

**<sup>19</sup>F NMR (376 MHz, CDCl<sub>3</sub>)** δ -120.13.

**HRMS (ESI):** Calculated for  $C_{25}H_{40}FNO_6Si$  ( $M+H$ )<sup>+</sup>: 498.26817; found: 498.26692.

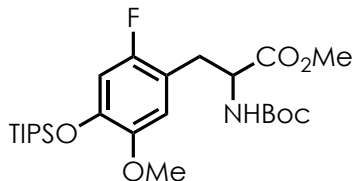

**Methyl 2-((*tert*-butoxycarbonyl)amino)-3-(2-fluoro-5-methoxy-4-((triisopropylsilyl)oxy)phenyl)propanoate (i-29)**

To a dry, clean round bottomed flask equipped with a stir bar was added methyl (*Z*)-2-((*tert*-butoxycarbonyl)amino)-3-(2-fluoro-5-methoxy-4-((triisopropylsilyl)oxy)phenyl)acrylate (0.977 g, 1.96 mmol, 1.0 eq.), which was then dissolved in 12 mL of a THF:EtOH (2:1) solution. 10% Palladium on carbon (20.9 mg, 0.20 mmol, 0.10 eq.) was added to the solution and the reaction was placed under  $N_2$ . The solution was purged and backfilled with  $H_2$  before being placed under a  $H_2$  atmosphere (1 atm) overnight (reaction is typically done in about 2-3 hours). Once the reaction was complete, the solution was run through a Celite plug and concentrated. The crude mixture was then purified by flash chromatography (10% EtOAc:Hex) to yield methyl 2-((*tert*-butoxycarbonyl)amino)-3-(2-fluoro-5-methoxy-4-((triisopropylsilyl)oxy)phenyl)propanoate as a white solid (0.950 g, 97%).

**$^1H$  NMR (600 MHz,  $CDCl_3$ )**  $\delta$  6.58 (d,  $J$  = 10.7 Hz, 1H), 6.56 (d,  $J$  = 7.7 Hz, 1H), 5.05 (d,  $J$  = 8.3 Hz, 1H) + rotamer at 4.80 (s), 4.52 (q,  $J$  = 6.8 Hz, 1H) + rotamer at 4.36 (s), 3.75 (s, 3H), 3.69 (s, 3H), 3.03 (qd,  $J$  = 14.0, 6.3 Hz, 2H), 1.41 (s, 9H), 1.27 – 1.20 (m, 3H), 1.07 (d,  $J$  = 7.5 Hz, 18H).

**$^{13}C$  NMR (151 MHz,  $CDCl_3$ )**  $\delta$  172.49, 155.22 (d,  $J$  = 238.6 Hz), 155.15, 147.43 (d,  $J$  = 2.6 Hz), 145.46 (d,  $J$  = 11.4 Hz), 114.58 (d,  $J$  = 17.4 Hz), 114.26 (d,  $J$  = 6.2 Hz), 108.20 (d,  $J$  = 25.3 Hz), 79.97, 56.20, 53.93, 52.41, 31.73, 28.43, 17.96, 12.91.

**$^{19}F$  NMR (376 MHz,  $CDCl_3$ )**  $\delta$  -126.06 (dd,  $J$  = 10.8, 7.3 Hz).

**HRMS (ESI):** Calculated for  $C_{25}H_{42}FNO_6Si$  ( $M+Na$ )<sup>+</sup>: 522.26579; found: 522.26462.

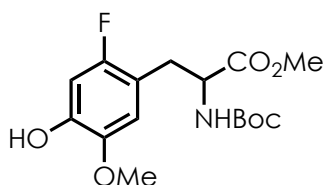

**Methyl 2-((*tert*-butoxycarbonyl)amino)-3-(2-fluoro-4-hydroxy-5-methoxyphenyl)propanoate (i-30)**

Methyl 2-((*tert*-butoxycarbonyl)amino)-3-(2-fluoro-5-methoxy-4-((triisopropylsilyl)oxy)phenyl)propanoate (0.925 g, 1.85 mmol, 1.0 eq.) was added to a clean, dry round bottomed flask equipped with a stir bar and the solid was dissolved in 20 mL of THF under  $N_2$ . The solution was then cooled to 0 °C before a solution of tetrabutylammonium fluoride (1.0 M in THF, 2.0 mL, 2.04 mmol, 1.1 eq.) was added dropwise to the reaction mixture. The reaction was then warmed to room temperature and allowed to stir for 2 h. At the end of the reaction, the reaction was quenched with 15 mL  $NH_4Cl$  solution before being diluted with EtOAc. The layers were separated and the aqueous layer was extracted twice with 10 mL EtOAc. The organic layers were combined, dried over  $Na_2SO_4$ , concentrated and purified by flash chromatography (40-50% EtOAc:Hex) to yield methyl 2-((*tert*-butoxycarbonyl)amino)-3-(2-fluoro-4-hydroxy-5-methoxyphenyl)propanoate as a white solid (0.620 g, 98%).

**<sup>1</sup>H NMR (600 MHz, CDCl<sub>3</sub>)** δ 6.64 (d, *J* = 10.2 Hz, 1H), 6.58 (d, *J* = 6.7 Hz, 1H), 5.68 (s, 1H), 5.07 (d, *J* = 8.3 Hz, 1H) + rotamer at 4.79 (s), 4.52 (q, *J* = 6.8 Hz, 1H) + rotamer at 4.36 (s), 3.84 (s, 3H), 3.73 (s, 3H), 3.11 – 2.96 (m, 2H) + rotamer at 2.87 (s), 1.41 (s, 9H).

**<sup>13</sup>C NMR (151 MHz, CDCl<sub>3</sub>)** δ 172.43, 155.82 (d, *J* = 238.0 Hz), 155.20, 145.66 (d, *J* = 12.3 Hz), 142.96 (d, *J* = 2.6 Hz), 113.33 (d, *J* = 18.0 Hz), 112.82 (d, *J* = 4.1 Hz), 102.74 (d, *J* = 28.2 Hz), 80.05, 56.54, 54.02, 52.49, 31.61, 28.44.

**<sup>19</sup>F NMR (376 MHz, CDCl<sub>3</sub>)** δ -125.14 (dd, *J* = 10.3, 6.8 Hz).

**HRMS (ESI):** Calculated for C<sub>16</sub>H<sub>22</sub>FNO<sub>6</sub> (M+Na)<sup>+</sup>: 366.13236; found: 366.13142.

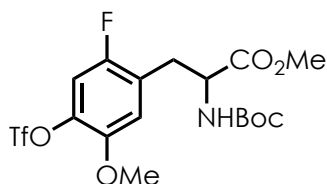

**Methyl 2-((*tert*-butoxycarbonyl)amino)-3-(2-fluoro-5-methoxy-4-(((trifluoromethyl)sulfonyl)oxy)phenyl)propanoate (36)**

To a dry, clean round bottomed flask equipped with a stir bar was added methyl 2-((*tert*-butoxycarbonyl)amino)-3-(2-fluoro-4-hydroxy-5-methoxyphenyl)propanoate (0.570 g, 1.75 mmol, 1.0 eq.) and the solid was dissolved in 20 mL of DCM under N<sub>2</sub>. The solution was cooled to 0 °C before pyridine (0.28 mL, 3.50 mmol, 2.0 eq.) was added to the solution. Trifluoromethanesulfonic anhydride (0.36 mL, 2.10 mmol, 1.2 eq.) was then added to the reaction dropwise and the solution was stirred for 15 minutes before being warmed to room temperature. The reaction was then run for 2 h. before being quenched with DI water. The reaction was then diluted with DCM before the layers were separated. The aqueous layer was extracted once with DCM (10 mL) and the organic layers were combined, washed sequentially with 10 mL of dilute HCl (2.0 M) and brine, dried over Na<sub>2</sub>SO<sub>4</sub> and concentrated. The crude product was purified via flash chromatography (10% EtOAc) to yield methyl 2-((*tert*-butoxycarbonyl)amino)-3-(2-fluoro-5-methoxy-4-(((trifluoromethyl)sulfonyl)oxy)phenyl)-propanoate as a white solid (720 mg, 90%).

**<sup>1</sup>H NMR (600 MHz, CDCl<sub>3</sub>)** δ 6.96 (d, *J* = 8.6 Hz, 1H), 6.83 (d, *J* = 6.4 Hz, 1H), 5.15 (d, *J* = 8.3 Hz, 1H) + rotamer at 4.98 (s), 4.58 (q, *J* = 7.2 Hz, 1H) + rotamer at 4.41 (s), 3.86 (s, 3H), 3.72 (s, 3H), 3.18 (dd, *J* = 14.1, 5.9 Hz, 1H), 3.03 (dd, *J* = 14.1, 7.3 Hz, 1H) + rotamer at 2.92 (s), 1.38 (s, 9H).

**<sup>13</sup>C NMR (151 MHz, CDCl<sub>3</sub>)** δ 171.94, 155.06, 154.20 (d, *J* = 242.4 Hz), 147.87 (d, *J* = 2.9 Hz), 137.02 (d, *J* = 11.0 Hz), 124.49 (d, *J* = 17.2 Hz), 118.76 (q, *J* = 320.4 Hz), 115.26 (d, *J* = 4.9 Hz), 110.50 (d, *J* = 28.1 Hz), 80.26, 56.73, 53.37, 52.61, 32.09, 28.30.

**<sup>19</sup>F NMR (376 MHz, CDCl<sub>3</sub>)** δ -73.59 (d, *J* = 2.9 Hz), -123.68 (d, *J* = 7.7 Hz).

**HRMS (ESI):** Calculated for C<sub>17</sub>H<sub>21</sub>F<sub>4</sub>NO<sub>8</sub>S (M+Na)<sup>+</sup>: 498.08164; found: 498.08065.

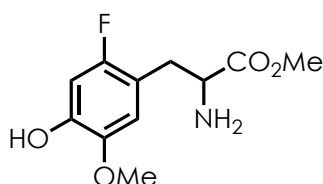

**Methyl 2-amino-3-(2-fluoro-4-hydroxy-5-methoxyphenyl)propanoate (i-31)** To a dry, clean round bottomed flask equipped with a stir bar was added methyl 2-((*tert*-butoxycarbonyl)amino)-3-(2-fluoro-5-methoxy-4-(((trifluoromethyl)sulfonyl)oxy)phenyl)propanoate (0.300 g, 0.874 mmol, 1.0 eq.). The fluoroarene was then dissolved in 4 mL of DCM under N<sub>2</sub> and the stirring solution was cooled

to 0 °C. Trifluoroacetic acid (1 mL) was added dropwise to the reaction and substrate conversion was observed by TLC. Once the reaction was complete, the solution was concentrated under reduced pressure (to remove excess TFA) and reconstituted in 10 mL DCM. This new solution was then cooled to 0 °C before dropwise addition of triethylamine (0.13 mL, 0.917 mmol, 1.05 eq.). The reaction mixture was allowed to stir for 2 h. Once the reaction was complete, it was diluted with H<sub>2</sub>O (10 mL) and DCM (10 mL). The organic layers were combined, washed with an additional portion of water (10 mL), dried over MgSO<sub>4</sub>, and concentrated under reduced pressure. The crude product was used without further purification (0.210 g, 99%).

**<sup>1</sup>H NMR (600 MHz, CDCl<sub>3</sub>)** δ 6.60 (d, *J* = 6.8 Hz, 1H), 6.55 (d, *J* = 10.5 Hz, 1H), 3.75 (s, 3H), 3.74 – 3.71 (m, 2H), 3.70 (s, 3H), 3.61 (bs, 2H), 3.00 (dd, *J* = 13.9, 5.3 Hz, 1H), 2.84 (dd, *J* = 13.9, 7.6 Hz, 1H).

**<sup>13</sup>C NMR (151 MHz, CDCl<sub>3</sub>)** δ 175.23, 155.62 (d, *J* = 237.7 Hz), 145.87 (d, *J* = 12.4 Hz), 143.36 (d, *J* = 2.4 Hz), 113.54 (d, *J* = 17.6 Hz), 113.13 (d, *J* = 6.2 Hz), 103.16 (d, *J* = 27.6 Hz), 56.37, 54.67, 52.22, 34.06.

**<sup>19</sup>F NMR (376 MHz, CDCl<sub>3</sub>)** δ -125.24 (dd, *J* = 10.6, 6.5 Hz).

**HRMS (ESI):** Calculated for C<sub>11</sub>H<sub>14</sub>FNO<sub>4</sub> (M+H)<sup>+</sup>: 244.09796; found: 244.09880

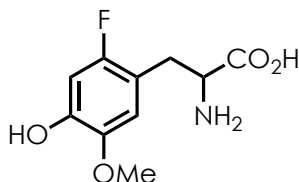

**2-Amino-3-(2-fluoro-4-hydroxy-5-methoxyphenyl)propanoic acid (i-32)** The title compound was prepared from methyl 2-amino-3-(2-fluoro-4-hydroxy-5-methoxyphenyl)propanoate according to a published procedure (74) for the non-fluorinated congener (methyl 2-amino-3-(4-hydroxy-5-methoxyphenyl)propanoate); spectra data are in agreement with literature values. (75)

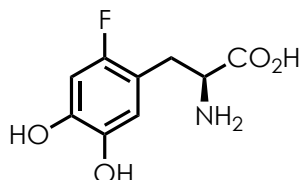

**6-Fluoro-L-3,4-dihydroxyphenylalanine (37)** The title compound was prepared according to a published procedure; spectral data are in agreement with literature values. (76)

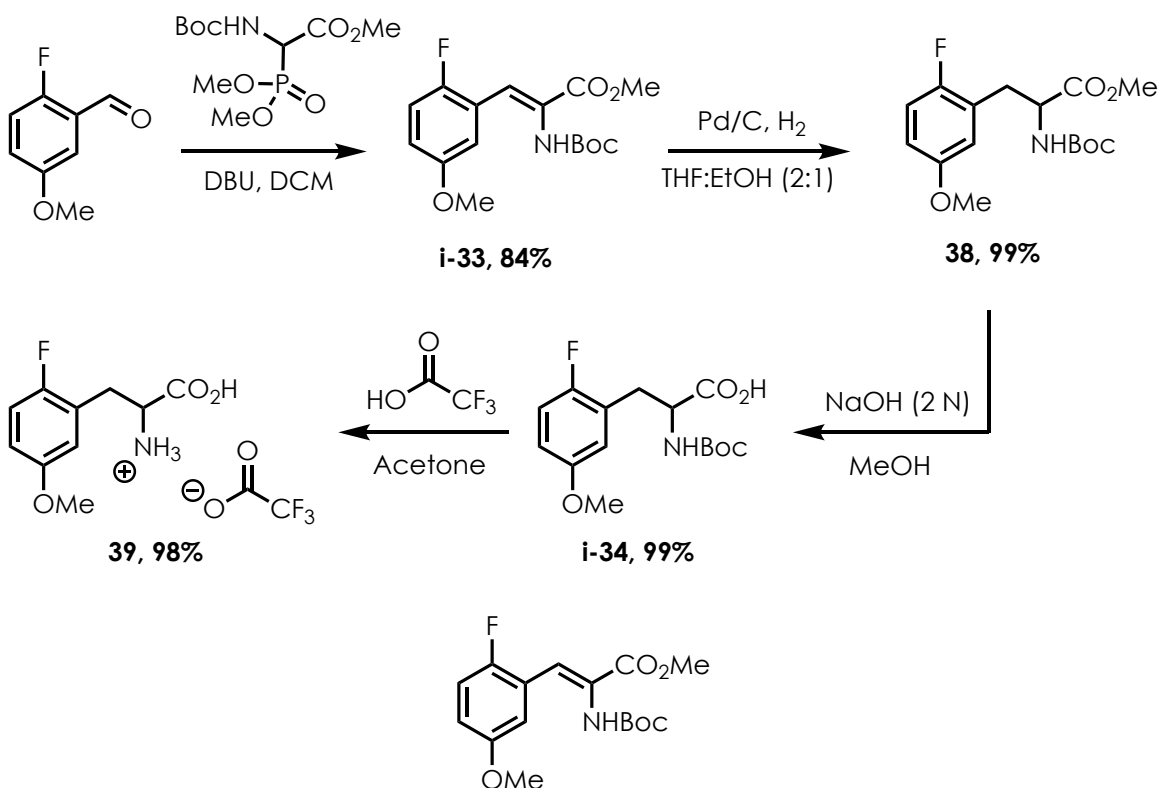

**Methyl (Z)-2-((*tert*-butoxycarbonyl)amino)-3-(2-fluoro-5-methoxyphenyl)acrylate (i-33)**

Methyl 2-((*tert*-butoxycarbonyl)amino)-2-(dimethoxyphosphoryl)acetate (1.783 g, 6.00 mmol, 1.2 eq.) was added to a flame dried round bottomed flask equipped with a stir bar and dissolved in 15 mL of dry DCM under N<sub>2</sub>. Then 1,8-diazabicyclo[5.4.0]undec-7-ene (0.75 mL, 5.00 mmol, 1.0 eq.) was added via syringe and the mixture was stirred at room temperature for 15 minutes. While the phosphonate ester solution was stirring, a solution of 2-fluoro-5-methoxybenzaldehyde (0.7707 g, 5.00 mmol, 1.0 eq.) in 15 mL DCM was prepared. This benzaldehyde solution was added to the phosphonate ester solution dropwise at room temperature. Reaction conversion was monitored via TLC (reaction takes approximately 4 h.) and at the end of the reaction, the solution was concentrated and loaded onto Celite. The crude reaction mixture was then purified via flash chromatography (20 to 30% EtOAc) to yield methyl (Z)-2-((*tert*-butoxycarbonyl)amino)-3-(2-fluoro-5-methoxyphenyl)-acrylate as a white solid (1.37 g, 84%)

**<sup>1</sup>H NMR (600 MHz, CDCl<sub>3</sub>)** δ 7.34 (bs, 1H), 7.25 (dd, *J* = 9.7, 2.9 Hz, 1H), 6.97 (td, *J* = 9.1, 3.1 Hz, 1H), 6.83 (dd, *J* = 9.1, 4.5 Hz, 1H), 6.46 (s, 1H), 3.84 (s, 3H), 3.83 (s, 3H), 1.38 (s, 9H).

**<sup>13</sup>C NMR (151 MHz, CDCl<sub>3</sub>)** δ 166.01, 156.69 (d, *J* = 238.2 Hz), 153.51 (d, *J* = 2.1 Hz), 152.43, 125.76, 124.50 (d, *J* = 8.2 Hz), 122.44, 116.48 (d, *J* = 23.2 Hz), 115.80 (d, *J* = 24.3 Hz), 111.99 (d, *J* = 8.3 Hz), 81.05, 56.32, 52.72, 28.13.

**<sup>19</sup>F NMR (376 MHz, CDCl<sub>3</sub>)** δ -123.87.

**HRMS (ESI):** Calculated for C<sub>16</sub>H<sub>20</sub>FO<sub>5</sub> (M+Na)<sup>+</sup>: 348.12180; found: 348.12177.

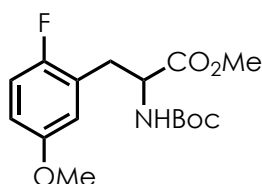

**Methyl 2-((*tert*-butoxycarbonyl)amino)-3-(2-fluoro-5-methoxyphenyl)propanoate (38)**

To a dry, clean round bottomed flask equipped with a stir bar was added methyl (*Z*)-2-((*tert*-butoxycarbonyl)amino)-3-(2-fluoro-5-methoxyphenyl)acrylate (1.37 g, 4.21 mmol, 1.0 eq.), which was then dissolved in 20 mL of a THF:EtOH (2:1) solution. 10% Palladium on carbon (89.6 mg, 0.20 mmol, 0.10 eq.) was added to the solution and the reaction was placed under N<sub>2</sub>. The solution was purged and backfilled with H<sub>2</sub> before being placed under a H<sub>2</sub> atmosphere (1 atm) overnight (reaction is typically done in about 2-3 hours). Once the reaction was complete, the solution was run through a Celite plug and concentrated. The crude mixture was then purified by flash chromatography (10 to 20% EtOAc:Hex) to yield methyl 2-((*tert*-butoxycarbonyl)amino)-3-(2-fluoro-5-methoxyphenyl)propanoate (1.34 g, 97%) as a white solid.

**<sup>1</sup>H NMR (600 MHz, CDCl<sub>3</sub>)** δ 6.90 (td, *J* = 8.5, 3.1 Hz, 1H), 6.81 (dd, *J* = 8.8, 3.1 Hz, 1H), 6.76 (dd, *J* = 9.1, 4.4 Hz, 1H), 5.18 (d, *J* = 8.1 Hz, 1H) + rotamer at 5.03 (d, *J* = 7.4 Hz), 4.51 (q, *J* = 7.2 Hz, 1H) + rotamer at 4.33 (bs), 3.79 (s, 3H), 3.70 (s, 3H), 3.08 (dd, *J* = 13.6, 5.5 Hz, 1H), 2.98 (dd, *J* = 13.7, 7.8 Hz, 1H), 1.38 (s, 9H).

**<sup>13</sup>C NMR (151 MHz, CDCl<sub>3</sub>)** δ 172.70, 156.83 (d, *J* = 238.3 Hz), 155.26, 153.88 (d, *J* = 2.1 Hz), 126.46 (d, *J* = 7.3 Hz), 117.98 (d, *J* = 23.0 Hz), 114.22 (d, *J* = 22.6 Hz), 111.18 (d, *J* = 8.3 Hz), 79.83, 55.96, 53.77, 52.29, 32.99, 28.36.

**<sup>19</sup>F NMR (376 MHz, CDCl<sub>3</sub>)** δ -124.13 (td, *J* = 8.2, 4.2 Hz).

**HRMS (ESI):** Calculated for C<sub>16</sub>H<sub>22</sub>FO<sub>5</sub> (M+Na)<sup>+</sup>: 350.13745; found: 350.13731.

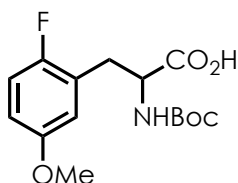**2-((*Tert*-butoxycarbonyl)amino)-3-(2-fluoro-5-methoxyphenyl)propanoic acid (i-34)**

To a dry, clean round bottomed flask equipped with a stir bar was added methyl 2-((*tert*-butoxycarbonyl)amino)-3-(2-fluoro-5-methoxyphenyl)propanoate (327.0 mg, 1.00 mmol, 1.0 eq.). The solid was dissolved in MeOH (5 mL) and a 2 N solution of sodium hydroxide (2.0 mL, 4.00 mmol, 4.0 eq.) was slowly added to the methanol solution. The reaction was then stirred at room temperature until all of the starting material was consumed (monitored via TLC). Upon completion of hydrolysis, the reaction mixture was diluted with EtOAc (15 mL) and dilute HCl solution was added until solution pH < 2.0. The layers were then separated and the aq. layer was extracted with two additional portions of EtOAc (2 x 10 mL). The organic layers were combined, washed with brine, dried over MgSO<sub>4</sub>, and concentrated under reduced pressure to reveal 2-((*tert*-butoxycarbonyl)amino)-3-(2-fluoro-5-methoxyphenyl)propanoic acid as a white solid. The isolated product was sufficiently pure to be used without further purification (310 mg, 99%).

**<sup>1</sup>H NMR (600 MHz, Acetone-d<sub>6</sub>)** δ 11.11 (bs, 1H), 7.02 (dd, *J* = 9.3, 2.6 Hz, 1H), 6.99 – 6.92 (m, 2H), 6.09 (d, *J* = 8.7 Hz, 1H) + rotamer at 5.69 (d, *J* = 8.4 Hz), 4.47 (td, *J* = 9.2, 4.8 Hz, 1H) + rotamer at 4.39 (bs), 3.85 (s, 3H), 3.27 (dd, *J* = 13.7, 4.9 Hz, 1H), 2.89 (dd, *J* = 13.6, 9.8 Hz, 1H), 1.33 (s, 9H).

**<sup>13</sup>C NMR (151 MHz, Acetone-d<sub>6</sub>)** δ 173.69, 157.46 (d, *J* = 235.7 Hz), 156.24, 155.07 (d, *J* = 2.1 Hz), 128.57 (d, *J* = 7.6 Hz), 118.51 (d, *J* = 23.5 Hz), 114.39 (d, *J* = 22.6 Hz), 112.25 (d, *J* = 8.5 Hz), 79.13, 56.33, 53.99, 33.19, 28.47.

**<sup>19</sup>F NMR (376 MHz, Acetone-d<sub>6</sub>)** δ -126.24 – -126.44 (m).

**HRMS (ESI):** Calculated for C<sub>15</sub>H<sub>20</sub>FO<sub>5</sub> (M+Na)<sup>+</sup>: 336.12180; found: 336.12168.

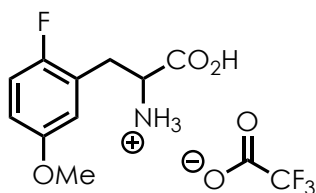

**2-Fluoro-5-methoxy-DL-phenylalanine trifluoroacetate salt (39)** To a dry, clean round bottomed flask equipped with a stir bar was added 2-((*tert*-butoxycarbonyl)amino)-3-(2-fluoro-5-methoxyphenyl)propanoic acid (235.0 mg, 0.750 mmol, 1.0 eq.). The solid was dissolved in acetone (10 mL) and the solution was cooled to 0 °C. Trifluoroacetic acid (2 mL) was added dropwise to the reaction solution and after 10 minutes of stirring, was allowed to warm to room temperature. The reaction was allowed to stir for 3 hours and upon the completion of the reaction, the solvents were removed under reduced pressure. Excess trifluoroacetic acid was azeotropically removed with small amounts of toluene and diethyl ether. A brown crystalline solid (2-fluoro-5-methoxy-DL-phenylalanine trifluoroacetate salt) was isolated and was analyzed without further purification (240.0 mg, 98%).

**<sup>1</sup>H NMR (600 MHz, DMSO)** δ 13.91 (bs, 1H), 8.28 (bs, 2H), 7.10 (td, *J* = 8.7, 3.2 Hz, 1H), 7.03 (dd, *J* = 9.0, 3.2 Hz, 1H), 6.99 (dd, *J* = 9.0, 4.5 Hz, 1H), 4.38 (bs, 1H), 4.09 (t, *J* = 7.0 Hz, 1H), 3.77 (s, 3H), 3.14 (dd, *J* = 13.9, 6.6 Hz, 1H), 2.97 (dd, *J* = 13.9, 7.3 Hz, 1H).

**<sup>13</sup>C NMR (151 MHz, DMSO)** δ 170.46, 158.01 (q, *J* = 30.9 Hz), 155.96 (d, *J* = 235.6 Hz), 154.00 (d, *J* = 1.5 Hz), 124.55 (d, *J* = 7.7 Hz), 117.81 (d, *J* = 23.3 Hz), 117.28 (q, *J* = 300.1 Hz), 114.63 (d, *J* = 22.5 Hz), 111.97 (d, *J* = 8.4 Hz), 55.90, 51.78, 30.98.

**<sup>19</sup>F NMR (376 MHz, DMSO)** δ -73.51, -124.19 (td, *J* = 8.7, 4.6 Hz).

**HRMS (ESI):** Calculated for C<sub>10</sub>H<sub>12</sub>FNO<sub>3</sub> (M+H)<sup>+</sup>: 214.08739; found: 214.08765 (only free amine mass detected).

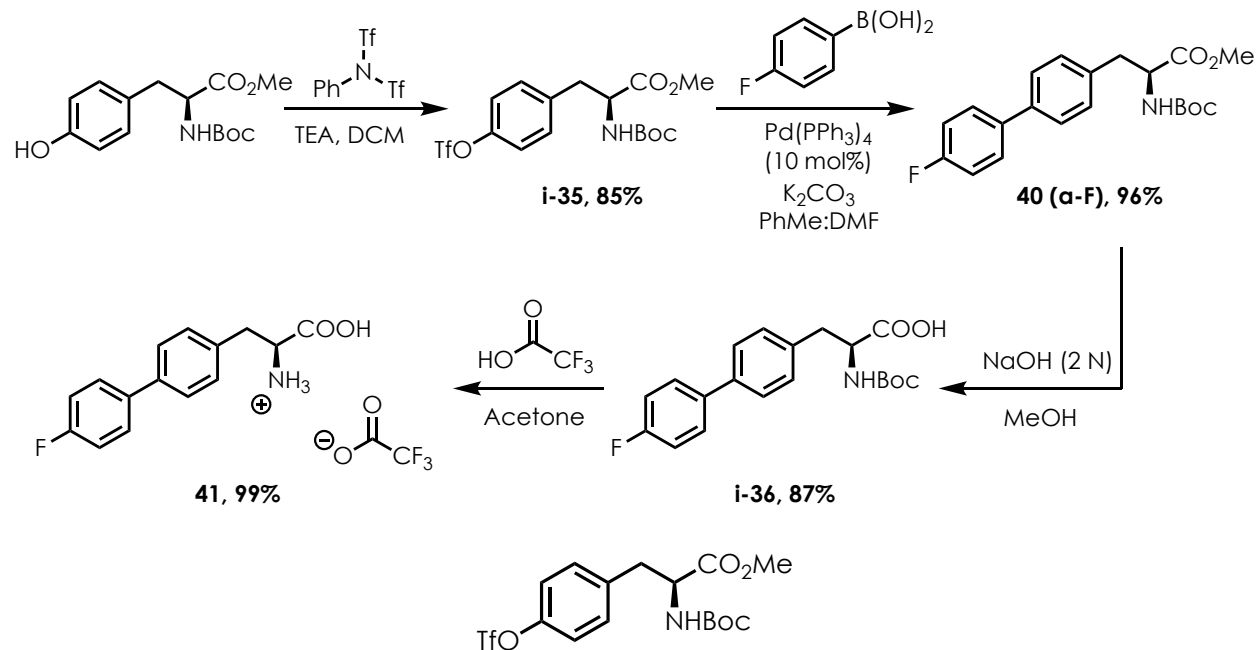

**N-Boc-4-(trifluoromethanesulfonyl)-L-phenylalanine methyl ester (i-35)** The title compound was prepared according to a published procedure; spectra data are in agreement with literature values. (77)

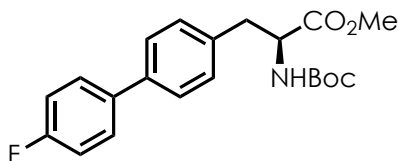

**Methyl (S)-2-((*tert*-butoxycarbonyl)amino)-3-(4'-fluoro-[1,1'-biphenyl]-4-yl)propanoate (40, a-F)**

To a clean, dry round bottomed flask equipped with a stir bar was added (4-fluorophenyl)boronic acid (276.4 mg, 1.98 mmol, 1.3 eq.) and potassium carbonate (546.1 mg, 3.95 mmol, 2.6 eq.). The flask containing the solids was then transferred into an N<sub>2</sub> glovebox, where tetrakis(triphenylphosphine)palladium(0) (175.6 mg, 0.152 mmol, 0.10 eq.) was added. The flask was then sealed with a rubber septum and subsequently removed from the glovebox. The flask was then placed under a positive N<sub>2</sub> pressure and the solids in the flask were dissolved in a 10:1 PhMe:DMF mixture (15.4 mL, 0.1 M). A prepared solution of *N*-Boc-4-(trifluoromethanesulfonyl)-*L*-phenylalanine methyl ester (649.5 mg, 1.52 mmol, 1.0 eq.) in PhMe (~0.4 M) was then added, and the reaction was stirred at 100 °C overnight. Upon completion (confirmed by consumption of substrate by TLC), the reaction was filtered through Celite into a separatory funnel, and diluted with EtOAc (10 mL) and water (20 mL). The layers were separated and the aq. layer was extracted with one portion of EtOAc (10 mL). The organic layers were combined and washed with two portions of LiCl solution and one portion of brine before being dried over MgSO<sub>4</sub> and concentrated. The crude mixture was then purified by column chromatography (10 to 30% EtOAc:Hex) to yield methyl (S)-2-((*tert*-butoxycarbonyl)amino)-3-(4'-fluoro-[1,1'-biphenyl]-4-yl)propanoate as a white solid (0.5430 g, 96%).

**<sup>1</sup>H NMR (600 MHz, CDCl<sub>3</sub>)** δ 7.55 – 7.49 (m, 2H), 7.48 (d, *J* = 7.6 Hz, 2H), 7.22 (d, *J* = 7.9 Hz, 2H), 7.12 (td, *J* = 8.6, 1.9 Hz, 2H), 5.18 (d, *J* = 8.6 Hz, 1H) + rotamer at 5.03 (bs), 4.66 (q, *J* = 6.7 Hz, 1H) + rotamer at 4.46 (bs), 3.20 (dd, *J* = 13.9, 5.8 Hz, 1H), 3.10 (dd, *J* = 13.9, 6.4 Hz, 1H), 1.45 (s, 9H).

**<sup>13</sup>C NMR (151 MHz, CDCl<sub>3</sub>)** δ 172.34, 162.38 (d, *J* = 246.2 Hz), 155.16, 138.82, 136.82 (d, *J* = 3.2 Hz), 135.16, 129.78, 128.50 (d, *J* = 7.8 Hz), 127.05, 115.59 (d, *J* = 21.3 Hz), 79.92, 54.41, 52.23, 37.86, 28.27.

**<sup>19</sup>F NMR (376 MHz, CDCl<sub>3</sub>)** δ -115.54 (td, *J* = 8.7, 8.2, 4.6 Hz).

**HRMS (ESI):** Calculated for C<sub>21</sub>H<sub>24</sub>FNO<sub>4</sub> (M+Na)<sup>+</sup>: 396.15818; found: 396.15813.

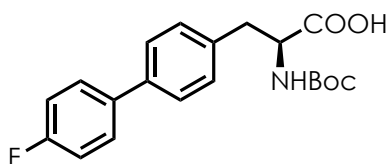

**(S)-2-((*Tert*-butoxycarbonyl)amino)-3-(4'-fluoro-[1,1'-biphenyl]-4-yl)propanoic acid (i-36)**

To a dry, clean round bottomed flask equipped with a stir bar was added methyl (S)-2-((*tert*-butoxycarbonyl)amino)-3-(4'-fluoro-[1,1'-biphenyl]-4-yl)propanoate (444.0 mg, 1.19 mmol, 1.0 eq.). The solid was dissolved in MeOH (5 mL) and a 2 N solution of sodium hydroxide (2.4 mL, 4.76 mmol, 4.0 eq.) was slowly added to the methanol solution. The reaction was then stirred at room temperature until all of the starting material was consumed (monitored via TLC). Upon completion of hydrolysis, the reaction mixture was diluted with EtOAc (15 mL) and dilute HCl solution was added until solution pH < 2.0. The layers were then separated and the aq. layer was extracted with two additional portions of EtOAc (2 x 10 mL). The organic layers were combined, washed with brine, dried over MgSO<sub>4</sub>, and concentrated under reduced pressure to reveal (S)-2-((*tert*-butoxycarbonyl)amino)-3-(4'-fluoro-[1,1'-biphenyl]-4-yl)propanoic acid as a white solid. The isolated product was sufficiently pure to be used without further purification (374.0 mg, 87%).

**<sup>1</sup>H NMR (600 MHz, Acetone-d<sub>6</sub>)** δ 11.25 (s, 1H), 7.68 (dd, *J* = 8.6, 5.5 Hz, 2H), 7.58 (d, *J* = 7.9 Hz, 2H), 7.39 (d, *J* = 7.9 Hz, 2H), 7.22 (t, *J* = 8.8 Hz, 2H), 6.11 (d, *J* = 8.5 Hz, 1H) + rotamer at 5.71 (d, *J* = 7.0 Hz), 4.46 (td, *J* = 8.7, 4.9 Hz, 1H) + rotamer at 4.37 (bs), 3.25 (dd, *J* = 13.9, 5.0 Hz, 1H), 3.05 (dd, *J* = 13.9, 9.0 Hz, 1H), 1.36 (s, 9H).

**<sup>13</sup>C NMR (151 MHz, Acetone-d<sub>6</sub>)** δ 173.57, 163.29 (d, *J* = 244.3 Hz), 156.32, 139.11, 138.06 (d, *J* = 3.2 Hz), 137.85, 130.84, 129.53 (d, *J* = 8.2 Hz), 127.61, 116.41 (d, *J* = 21.5 Hz), 79.32, 55.72, 37.81, 28.55.

**<sup>19</sup>F NMR (376 MHz, Acetone-d<sub>6</sub>)** δ -117.66 (tt, *J* = 8.3, 5.1 Hz).

**HRMS (ESI):** Calculated for C<sub>20</sub>H<sub>22</sub>FNO<sub>4</sub> (M+Na)<sup>+</sup>: 382.14253; found: 382.14239.

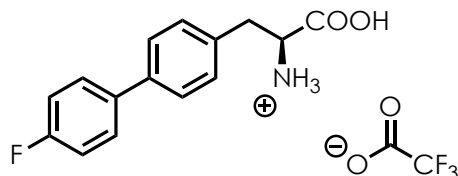

**(S)-2-Amino-3-(4'-fluoro-[1,1'-biphenyl]-4-yl)propanoic acid trifluoroacetate salt (41)**

To a dry, clean round bottomed flask equipped with a stir bar was added (*S*)-2-((*tert*-butoxycarbonyl)amino)-3-(4'-fluoro-[1,1'-biphenyl]-4-yl)propanoic acid (334.6 mg, 0.931 mmol, 1.0 eq.). The solid was dissolved in acetone (10 mL) and the solution was cooled to 0 °C. Trifluoroacetic acid (2 mL) was added dropwise to the reaction solution and after 10 minutes of stirring, was allowed to warm to room temperature. The reaction was allowed to stir for 3 hours and upon the completion of the reaction, the solvents were removed under reduced pressure. Excess trifluoroacetic acid was azeotropically removed with small amounts of toluene and diethyl ether. An off-white solid [(*S*)-2-amino-3-(4'-fluoro-[1,1'-biphenyl]-4-yl)propanoic acid trifluoroacetate salt] was isolated and was analyzed without further purification (345.7 mg, 99%).

**<sup>1</sup>H NMR (600 MHz, CD<sub>3</sub>CN)** δ 7.69 – 7.65 (m, 2H), 7.64 (d, *J* = 8.3 Hz, 2H), 7.37 (d, *J* = 8.2 Hz, 2H), 7.25 – 7.18 (m, 2H), 4.30 (dd, *J* = 8.1, 5.5 Hz, 1H), 3.36 (dd, *J* = 14.7, 5.5 Hz, 1H), 3.19 (dd, *J* = 14.8, 8.1 Hz, 1H). (NH<sub>3</sub> and COOH peaks not observed)

**<sup>1</sup>H NMR (600 MHz, MeOD)** δ 7.65 – 7.60 (m, 4H), 7.38 (d, *J* = 8.2 Hz, 2H), 7.18 (t, *J* = 8.8 Hz, 2H), 4.27 (dd, *J* = 7.9, 5.3 Hz, 1H), 3.36 (dd, *J* = 14.6, 5.4 Hz, 1H), 3.19 (dd, *J* = 14.5, 7.9 Hz, 1H). (NH<sub>3</sub> and COOH peaks not observed)

**<sup>13</sup>C NMR (151 MHz, CD<sub>3</sub>CN)** δ 169.73, 163.52 (d, *J* = 244.7 Hz), 159.11 (q, *J* = 39.5 Hz), 140.34, 137.40 (d, *J* = 3.3 Hz), 133.97, 131.18, 129.69 (d, *J* = 8.3 Hz), 128.39, 116.64 (d, *J* = 21.6 Hz), 116.24 (q, *J* = 286.8 Hz), 55.28, 35.74.

**<sup>13</sup>C NMR (151 MHz, MeOD)** δ 171.35, 164.00 (d, *J* = 245.1 Hz), 141.01, 138.14 (d, *J* = 3.2 Hz), 134.74, 131.05, 129.75 (d, *J* = 8.1 Hz), 128.60, 116.62 (d, *J* = 21.5 Hz), 55.17, 37.01. (TFA peaks not observed)

**<sup>19</sup>F NMR (376 MHz, CD<sub>3</sub>CN)** δ -76.76, -116.95 – -117.08 (m).

**<sup>19</sup>F NMR (376 MHz, MeOD)** δ -77.09, -117.79 (ddd, *J* = 14.1, 9.5, 5.4 Hz).

**HRMS (ESI):** Calculated for C<sub>15</sub>H<sub>14</sub>FNO<sub>2</sub> (M+H)<sup>+</sup>: 260.10813; found: 260.10836 (only free amine mass detected).

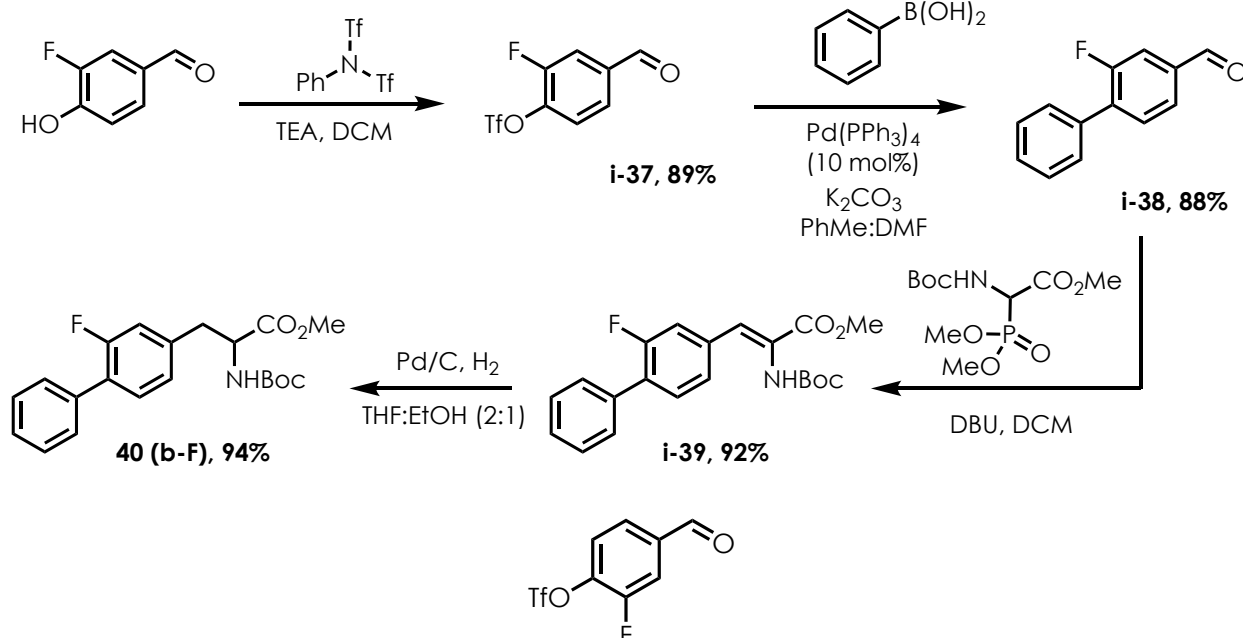

**2-Fluoro-4-formylphenyl trifluoromethanesulfonate (i-37)** The title compound was prepared according to a published procedure (78); spectra data are provided herein.

**<sup>1</sup>H NMR (600 MHz, CDCl<sub>3</sub>)** δ 9.98 (d, *J* = 1.9 Hz, 1H), 7.81 – 7.69 (m, 2H), 7.54 (dd, *J* = 8.6, 6.8 Hz, 1H).

**<sup>13</sup>C NMR (151 MHz, CDCl<sub>3</sub>)** δ 189.28 (d, *J* = 2.0 Hz), 154.28 (d, *J* = 257.4 Hz), 140.95 (d, *J* = 13.8 Hz), 137.30 (d, *J* = 5.0 Hz), 126.92 (d, *J* = 3.8 Hz), 124.62, 118.73 (q, *J* = 320.7 Hz), 117.67 (d, *J* = 18.8 Hz).

**<sup>19</sup>F NMR (376 MHz, CDCl<sub>3</sub>)** δ -72.79 (d, *J* = 4.9 Hz), -124.44 (dpd, *J* = 10.0, 4.9, 2.3 Hz).

**HRMS (ESI):** Calculated for C<sub>8</sub>H<sub>4</sub>F<sub>4</sub>O<sub>4</sub>S (M+Na)<sup>+</sup>: 294.96588; found: 294.96607.

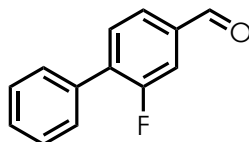

**2-Fluoro-[1,1'-biphenyl]-4-carbaldehyde (i-38)** To a clean, dry round bottomed flask equipped with a stir bar was added phenylboronic acid (949.0 mg, 7.79 mmol, 1.3 eq.) and potassium carbonate (2.15 g, 15.6 mmol, 2.6 eq.). The flask containing the solids was then transferred into an N<sub>2</sub> glovebox, where tetrakis(triphenylphosphine)palladium(0) (692 mg, 0.599 mmol, 0.10 eq.) was added. The flask was then sealed with a rubber septum and subsequently removed from the glovebox. The flask was then placed under a positive N<sub>2</sub> pressure and the solids in the flask were dissolved in a 10:1 PhMe:DMF mixture (55 mL, 0.1 M). A prepared solution of 2-fluoro-4-formylphenyl trifluoromethanesulfonate (1.63 g, 5.99 mmol, 1.0 eq.) in PhMe (~0.4 M) was then added, and the reaction was stirred at 100 °C overnight. Upon completion (confirmed by consumption of substrate by TLC), the reaction was filtered through Celite into a separatory funnel, and diluted with EtOAc (10 mL) and water (20 mL). The layers were separated and the aq. layer was extracted with one portion of EtOAc (10 mL). The organic layers were combined and washed with two portions of LiCl solution and one portion of brine before being dried over MgSO<sub>4</sub> and concentrated. The crude mixture was then purified by column chromatography (10 to 30% EtOAc:Hex) to yield 2-fluoro-[1,1'-biphenyl]-4-carbaldehyde as a white solid (1.05 g, 88%).

**<sup>1</sup>H NMR (600 MHz, CDCl<sub>3</sub>)** δ 10.01 (d, *J* = 1.8 Hz, 1H), 7.74 (dd, *J* = 7.8, 1.6 Hz, 1H), 7.67 (dd, *J* = 10.3, 1.6 Hz, 1H), 7.63 (t, *J* = 7.6 Hz, 1H), 7.59 (dt, *J* = 8.1, 1.5 Hz, 2H), 7.51 – 7.46 (m, 2H), 7.46 – 7.42 (m, 1H).

**<sup>13</sup>C NMR (151 MHz, CDCl<sub>3</sub>)** δ 190.75 (d, *J* = 2.1 Hz), 160.08 (d, *J* = 251.1 Hz), 137.14 (d, *J* = 6.6 Hz), 135.37 (d, *J* = 13.8 Hz), 134.57 (d, *J* = 1.5 Hz), 131.57 (d, *J* = 3.4 Hz), 129.15 (d, *J* = 3.1 Hz), 128.84, 128.78, 126.18 (d, *J* = 3.4 Hz), 116.46 (d, *J* = 23.7 Hz).

**<sup>19</sup>F NMR (376 MHz, CDCl<sub>3</sub>)** δ -118.11.

**HRMS (ESI):** Calculated for C<sub>13</sub>H<sub>9</sub>FO (M+H)<sup>+</sup>: 201.07102; found: 201.07122.

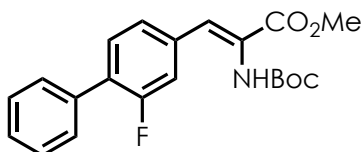

**Methyl (Z)-2-((tert-butoxycarbonyl)amino)-3-(2-fluoro-[1,1'-biphenyl]-4-yl)acrylate (i-39)**

Methyl 2-((tert-butoxycarbonyl)amino)-2-(dimethoxyphosphoryl)acetate (0.884 g, 5.30 mmol, 1.2 eq.) was added to a flame dried round bottomed flask equipped with a stir bar and dissolved in 15 mL of dry DCM under N<sub>2</sub>. Then 1,8-diazabicyclo[5.4.0]undec-7-ene (0.67 mL, 4.42 mmol, 1.0 eq.) was added via syringe and the mixture was stirred at room temperature for 15 minutes. While the phosphonate ester solution was stirring, a solution of 2-fluoro-[1,1'-biphenyl]-4-carbaldehyde (0.8840 g, 4.42 mmol, 1.0 eq.) in 12 mL DCM was prepared. This benzaldehyde solution was added to the phosphonate ester solution dropwise at room temperature. Reaction conversion was monitored via TLC (reaction takes approximately 4 h.) and at the end of the reaction, the solution was concentrated and loaded onto Celite. The crude reaction mixture was then purified via flash chromatography (20 to 30% EtOAc) to yield methyl (Z)-2-((tert-butoxycarbonyl)amino)-3-(2-fluoro-[1,1'-biphenyl]-4-yl)acrylate as a white solid (1.51 g, 92%)

**<sup>1</sup>H NMR (600 MHz, CDCl<sub>3</sub>)** δ 7.56 (dt, *J* = 8.1, 1.5 Hz, 2H), 7.48 – 7.41 (m, 3H), 7.40 – 7.34 (m, 3H), 7.26 (bs, 1H), 6.41 (bs, 1H), 3.88 (s, 3H), 1.43 (s, 9H).

**<sup>13</sup>C NMR (151 MHz, CDCl<sub>3</sub>)** δ 165.97, 159.60 (d, *J* = 247.7 Hz), 152.40, 135.42, 135.36, 130.61 (d, *J* = 3.9 Hz), 129.76 (d, *J* = 13.7 Hz), 129.08 (d, *J* = 3.2 Hz), 128.65, 128.17 (d, *J* = 2.4 Hz), 128.13, 126.22 (d, *J* = 3.2 Hz), 124.88, 116.91 (d, *J* = 24.4 Hz), 81.47, 52.95, 28.24.

**<sup>19</sup>F NMR (376 MHz, CDCl<sub>3</sub>)** δ -116.07 (t, *J* = 8.8 Hz).

**HRMS (ESI):** Calculated for C<sub>21</sub>H<sub>22</sub>FNO<sub>4</sub> (M+Na)<sup>+</sup>: 394.14253; found: 394.14247.

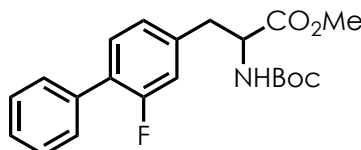

**Methyl 2-((tert-butoxycarbonyl)amino)-3-(2-fluoro-[1,1'-biphenyl]-4-yl)propanoate (40, b-F)**

To a dry, clean round bottomed flask equipped with a stir bar was added methyl (Z)-2-((tert-butoxycarbonyl)amino)-3-(2-fluoro-[1,1'-biphenyl]-4-yl)acrylate (1.51 g, 4.07 mmol, 1.0 eq.), which was then dissolved in 27 mL of a THF:EtOH (2:1) solution. 10% Palladium on carbon (86.5 mg, 0.20 mmol, 0.10 eq.) was added to the solution and the reaction was placed under N<sub>2</sub>. The solution was purged and backfilled with H<sub>2</sub> before being placed under a H<sub>2</sub> atmosphere (1 atm) overnight (reaction is typically done in about 2-3 hours). Once the reaction was complete, the solution was run through a Celite plug and concentrated. The crude mixture was then purified by flash chromatography (10 to

30% EtOAc:Hex) to yield methyl 2-((*tert*-butoxycarbonyl)amino)-3-(2-fluoro-5-methoxyphenyl)propanoate (1.43 g, 94%) as a white solid.

**<sup>1</sup>H NMR (600 MHz, CDCl<sub>3</sub>)** δ 7.56 (dt, *J* = 8.1, 1.5 Hz, 2H), 7.47 (t, *J* = 7.7 Hz, 2H), 7.42 – 7.35 (m, 2H), 7.04 – 6.99 (m, 1H), 6.97 (d, *J* = 11.3 Hz, 1H), 5.10 (d, *J* = 8.3 Hz, 1H) + rotamer at 4.85 (bs), 4.66 (dt, *J* = 8.2, 5.9 Hz, 1H) + rotamer at 4.47 (bs), 3.79 (s, 3H), 3.21 (dd, *J* = 13.9, 5.6 Hz, 1H), 3.10 (dd, *J* = 13.9, 6.2 Hz, 1H), 1.46 (s, 9H).

**<sup>13</sup>C NMR (151 MHz, CDCl<sub>3</sub>)** δ 172.19, 159.65 (d, *J* = 248.2 Hz), 155.16, 137.67 (d, *J* = 7.7 Hz), 135.59, 130.85 (d, *J* = 3.9 Hz), 129.04 (d, *J* = 3.0 Hz), 128.75 (d, *J* = 12.1 Hz), 128.56, 127.76, 125.44 (d, *J* = 3.4 Hz), 117.10 (d, *J* = 23.0 Hz), 80.23, 54.33, 52.53, 37.91, 28.40.

**<sup>19</sup>F NMR (376 MHz, CDCl<sub>3</sub>)** δ -118.03 (t, *J* = 9.7 Hz).

**HRMS (ESI):** Calculated for C<sub>21</sub>H<sub>24</sub>FNO<sub>4</sub> (M+Na)<sup>+</sup>: 396.15818; found: 396.15814.

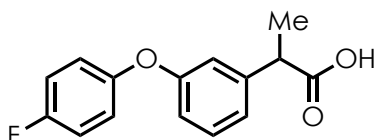

**2-(3-(4-Fluorophenoxy)phenyl)propanoic acid (42)**

To a dry, clean round bottomed flask equipped with a stir bar was added methyl 2-(3-(4-fluorophenoxy)phenyl)propanoate (256.0 mg, 0.933 mmol, 1.0 eq.). The solid was dissolved in MeOH (5 mL) and a 2 N solution of sodium hydroxide (2.4 mL, 4.76 mmol, 4.0 eq.) was slowly added to the methanol solution. The reaction was then stirred at room temperature until all of the starting material was consumed (monitored via TLC). Upon completion of hydrolysis, the reaction mixture was diluted with EtOAc (15 mL) and dilute HCl solution was added until solution pH < 2.0. The layers were then separated and the aq. layer was extracted with two additional portions of EtOAc (2 x 10 mL). The organic layers were combined, washed with brine, dried over MgSO<sub>4</sub>, and concentrated under reduced pressure to reveal 2-(3-(4-fluorophenoxy)phenyl)propanoic acid as a white solid. The isolated product was sufficiently pure to be used without further purification (220.0 mg, 91%).

**<sup>1</sup>H NMR (600 MHz, CDCl<sub>3</sub>)** δ 11.15 (s, 1H), 7.28 (t, *J* = 7.8 Hz, 1H), 7.08 – 7.01 (m, 3H), 7.00 – 6.96 (m, 3H), 6.84 (dd, *J* = 8.3, 2.4 Hz, 1H), 3.71 (q, *J* = 7.1 Hz, 1H), 1.50 (d, *J* = 7.2 Hz, 3H).

**<sup>13</sup>C NMR (151 MHz, CDCl<sub>3</sub>)** δ 180.71, 159.02 (d, *J* = 241.9 Hz), 158.06, 152.64 (d, *J* = 2.7 Hz), 141.82, 130.07, 122.40, 120.81 (d, *J* = 8.2 Hz), 117.74, 116.96, 116.48 (d, *J* = 23.2 Hz), 45.33, 18.15.

**<sup>19</sup>F NMR (376 MHz, CDCl<sub>3</sub>)** δ -119.75 (dt, *J* = 8.8, 4.8 Hz).

**HRMS (ESI):** Calculated for C<sub>15</sub>H<sub>13</sub>FO<sub>3</sub> (M+H)<sup>+</sup>: 261.09215; found: 261.09362.

## 4. Synthesis and Analysis of Fluorinated HPLC Standards for Arene C-H Fluorination

### 4.1 General C-H fluorination procedure for CsF as the fluorine source

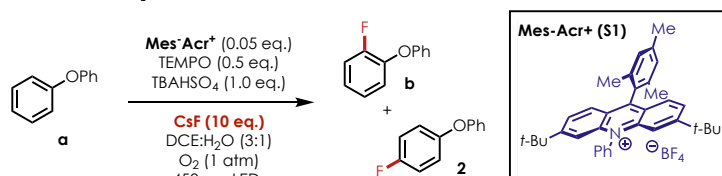

Photocatalyst **S1** (1.4mg, 0.0025mmol, 0.05eq.), diphenyl ether (8.5mg, 0.05mmol, 1.0eq.), TBAHSO<sub>4</sub> (8.5mg, 0.025mmol, 0.5eq.), TEMPO (3.9mg, 0.025mmol, 0.5eq.) and CsF (76.0mg, 0.5mmol, 10eq) were weighed and added sequentially to a dried glass vial equipped with a stir bar. 225μL DCE and 75μL H<sub>2</sub>O was added. The vial was then sealed with a Teflon-lined septum screw cap. The septum was then pierced with a disposable steel needle connected to an oxygen-filled balloon. A vent needle was inserted and the reaction medium was sparged for 1 minutes by bubbling oxygen through the mixture. Then the vent needle was removed, and the oxygen balloon was maintained, providing approximately 1 atm of oxygen to the vial headspace for the course of the reaction. The reaction flask was then placed on a stir plate and illuminated with blue LED lamps (455 nm). Analysis the reaction by HPLC at 2.5 h and 24 h.

### 4.2 General C-H fluorination procedure for TBAF as the fluorine source

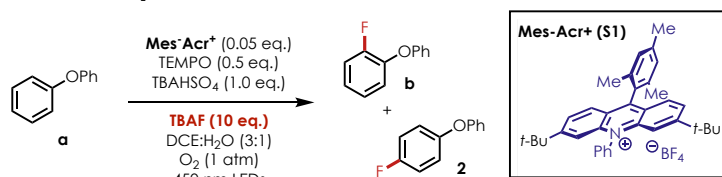

Photocatalyst **S1** (1.4mg, 0.0025mmol, 0.05eq.), diphenyl ether (8.5mg, 0.05mmol, 1.0eq.), TEMPO (3.9mg, 0.025mmol, 0.5eq.) were weighed and added sequentially to a dried glass vial equipped with a stir bar. 500μL anhydrous TBAF (1M in THF) was added. The vial was then sealed with a Teflon-lined septum screw cap. The septum was then pierced with a disposable steel needle connected to an oxygen-filled balloon. A vent needle was inserted and the reaction medium was sparged for 1 minutes by bubbling oxygen through the mixture. Then the vent needle was removed, and the oxygen balloon was maintained, providing approximately 1 atm of oxygen to the vial headspace for the course of the reaction. The reaction flask was then placed on a stir plate and illuminated with blue LED lamps (455 nm). Analysis the reaction by HPLC at 2.5 h and 24 h.

### 4.3 General HPLC condition

Column: Phenomenex, Kinetex® Aeris PEPTIDE 3.6u XB-C18, 250 x 4.6 mm LC Column. Solvent A: 0.1%TFA water; Solvent B: 0.1%TFA acetonitrile; Grad/isocrat: 0 to 2 min: 5% to 45% solvent B, 2 to 22 min: 45% to 50% solvent B, 22 to 28 min: 50% to 95% solvent B, 28 to 28.1 min: 95% to 5% solvent B, 28.1 to 30 min: isocratic elution at 5% solvent B. Flow rate: 1 mL/min, column temperature: 19 to 21 °C.

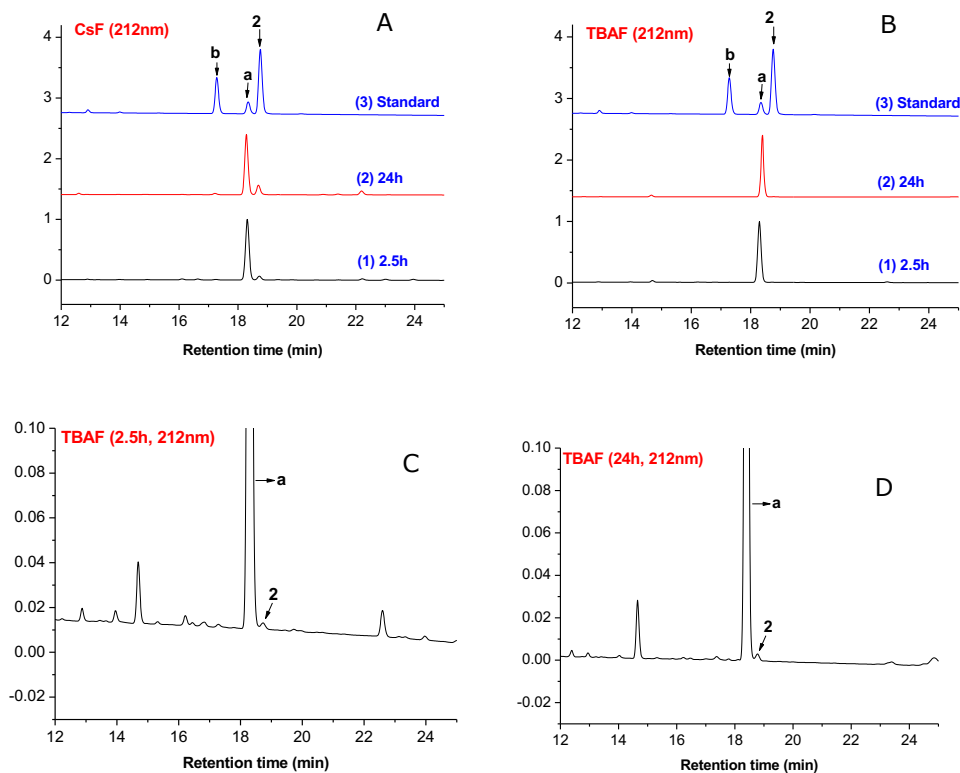

**Fig. S2.** Overlaid (**A** and **B**) or enlarged (**C** and **D**) UV-HPLC chromatograms (at 212nm) for the crude reaction mixture of CsF or TBAF system at 2.5 h and 24 h

| Fluorine source | Reaction time | Area ratio (2:a) |
|-----------------|---------------|------------------|
| CsF             | 2.5 h         | 1:15.12          |
|                 | 24 h          | 1:5.765          |
| TBAF            | 2.5 h         | 1:262.48         |
|                 | 24 h          | 1:218.8          |

**Table S2.** Time and  $^{19}\text{F}$ -source dependent C-H fluorination of diphenyl ether

## 5. Experimental Procedures for Radiochemistry

### 5.1 Synthesis of [ $^{18}\text{F}$ ]TBAF, [ $^{18}\text{F}$ ]CsF, [ $^{18}\text{F}$ ]KF, K[ $^{18}\text{F}$ ]F-kryptofix

#### 5.1.1 General procedure for the preparation of [ $^{18}\text{F}$ ]TBAF

[ $^{18}\text{F}$ ]TBAF was prepared on a TRACERLab FXFN (General Electric, GE) automated radiochemistry synthesis module. Before [ $^{18}\text{F}$ ]fluoride delivery, ports in the module were charged under ambient atmosphere as follows:

- Port 1: A combination of 70  $\mu\text{L}$  tetrabutylammonium bicarbonate (TBAB) solution (20%, w/w), 53  $\mu\text{L}$   $\text{H}_2\text{O}$ , and 477  $\mu\text{L}$  MeCN (Total volume: 600  $\mu\text{L}$ )
- Port 3: anhydrous MeCN (1 mL)
- Port 4: anhydrous MeCN (1 mL)

[ $^{18}\text{F}$ ]Fluoride was produced via the  $^{18}\text{O}(\text{p},\text{n})^{18}\text{F}$  reaction by proton irradiation (40  $\mu\text{A}$ , 2-5 min) of an [ $^{18}\text{O}$ ]H $_2\text{O}$  containing target in a GE PETTrace cyclotron. The [ $^{18}\text{F}$ ]fluoride (ca. 1.2-2.2 Ci) was delivered to the synthesis module in a bolus of [ $^{18}\text{O}$ ]H $_2\text{O}$  by stream of argon. The aqueous solution of [ $^{18}\text{F}$ ]fluoride was passed through a QMA cartridge (water preconditioning) to trap [ $^{18}\text{F}$ ]fluoride before elution into the reactor vessel with a solution of TBAB (contents of Port 1). This solution was azeotropically dried by heating the reaction vessel to 100  $^{\circ}\text{C}$  and drawing vacuum (ca. 1 kPa) for 5 min, followed by simultaneous vacuum draw and nitrogen stream for a further 6 minutes. The dried [ $^{18}\text{F}$ ]TBAF was cooled to 50  $^{\circ}\text{C}$  before addition of anhydrous MeCN (contents of Port 3). The mixture was transferred out of the reactor under  $\text{N}_2$  pressure into a sterile vial to yield a solution of [ $^{18}\text{F}$ ]TBAF (1.1-1.8 Ci, average = 1.5 Ci) in MeCN. 10-100  $\mu\text{L}$  aliquots of this solution were then used for manual methodology experiments.

#### 5.1.2 General procedure for the preparation of [ $^{18}\text{F}$ ]CsF solution

**First Method:** 0.9% cesium chloride as the eluent.

QMA-light Sep-Paks were preconditioned with 10 mL of 0.9% cesium chloride solution, followed by 10 mL of water before use. Target rinse (200 mCi) was then passed through the QMA-light Sep-Pak to trap the fluoride-18. The QMA cartridge was washed with additional 10 mL ultrapure water to remove any residual [ $^{18}\text{O}$ ]H $_2\text{O}$  and then eluted with 1 mL of 0.9% cesium chloride solution to yield an aqueous solution of [ $^{18}\text{F}$ ]CsF (~150 mCi) into a 5 mL glass tube for use.

**Second Method:** 0.9% cesium carbonate as the eluent.

QMA cartridge were preconditioned with 10 mL of 0.9% cesium carbonate solution, followed by 10 mL of water before use. Target rinse (200 mCi) was then passed through the QMA-light Sep-Pak to trap the fluoride-18. The QMA cartridge was washed with additional 10 mL ultrapure water to remove any residual [ $^{18}\text{O}$ ]H $_2\text{O}$  and then eluted with 1 mL of 0.9% cesium carbonate solution to yield an aqueous solution of [ $^{18}\text{F}$ ]CsF (~150 mCi) into a 5 mL glass tube for use.

**Third Method:** 0.9% cesium fluoride as the eluent.

QMA-light Sep-Paks were preconditioned with 10 mL of 0.9% cesium fluoride solution, followed by 10 mL of water before use. Target rinse (200 mCi) was then passed through the QMA cartridge to trap the fluoride-18. The QMA cartridge was washed with additional 10 mL ultrapure water to remove any residual [ $^{18}\text{O}$ ]H $_2\text{O}$  and then eluted with 1 mL of 0.9% cesium fluoride solution to yield an aqueous solution of [ $^{18}\text{F}$ ]CsF (~150 mCi) into a 5 mL glass tube for use.

**Fourth Method:** A mixture of 4.2 mg CsCl (0.025 mmol) and [ $^{18}\text{F}$ ]TBAF (10~20 mCi)

The **S1** (1.4 mg, 0.0025 mmol, 0.05 eq.), diphenyl ether (8.5 mg, 0.05 mmol, 1.0 eq.), CsCl (4.2 mg, 0.025 mmol, 0.5 eq.), TBAHSO $_4$  (8.5 mg, 0.025 mmol, 0.5 eq.), TEMPO (3.9 mg, 0.025 mmol, 0.5 eq.) were weighed into a 2.5 mL dried glass vial equipped with a stir bar and dissolved in 175  $\mu\text{L}$  DCE and 75  $\mu\text{L}$  H $_2\text{O}$ . Then a 50  $\mu\text{L}$  aliquot of [ $^{18}\text{F}$ ]TBAF in DCE (typically 10-20 mCi, preparation method: MeCN in [ $^{18}\text{F}$ ]TBAF was dried by heating to 100  $^{\circ}\text{C}$  and argon stream for 5 min, then cooled to RT before addition of 200  $\mu\text{L}$  anhydrous DCE) was added to the reaction vial via syringe.

**Fifth Method:** A mixture of 7.6 mg CsF (0.05 mmol) and [ $^{18}\text{F}$ ]TBAF (10~20 mCi)

The **S1** (1.4mg, 0.0025mmol, 0.05eq.), diphenyl ether (8.5mg, 0.05mmol, 1.0eq.), CsF (7.6mg, 0.05mmol, 1.0eq.), TBAHSO<sub>4</sub> (8.5mg, 0.025mmol, 0.5eq.), TEMPO (3.9mg, 0.025mmol, 0.5eq.) were weighed into a 2.5mL dried glass vial equipped with a stir bar and dissolved in 175μL DCE and 75μL H<sub>2</sub>O. Then a 50μL aliquot of [<sup>18</sup>F]TBAF in DCE (typically 10-20 mCi) was added to the reaction vial via syringe.

#### 5.1.3 General procedure for the preparation of [<sup>18</sup>F]KF solution

QMA-light Sep-Paks were preconditioned with 10mL of 0.9% potassium perchlorate solution, followed by 10 mL of water before use. Target rinse (200 mCi) was then passed through the QMA-light Sep-Pak to trap the fluoride-18. The QMA cartridge was washed with additional 10mL ultrapure water to remove any residual [<sup>18</sup>O]H<sub>2</sub>O and then eluted with 1mL of 0.9% potassium perchlorate solution to yield an aqueous solution of [<sup>18</sup>F]KF (~150 mCi) into a 5mL glass tube for use.

#### 5.1.4 General procedure for the preparation of K[<sup>18</sup>F]F-kryptofix solution

K[<sup>18</sup>F]F-kryptofix preparation was conducted on a TRACERLab FXFN (General Electric, GE) automated radiochemistry synthesis module which is same as [<sup>18</sup>F]TBAF preparation procedure. The <sup>18</sup>F was released from the QMA cartridge by passing K<sub>2</sub>CO<sub>3</sub> solution through the cartridge and allowed to enter into the reactor. Kryptofix K2.2.2 solution was added into the reactor and the whole mixture was dried at 95°C in combination of nitrogen flow and vacuum. Then 1mL anhydrous MeCN was added to yield K[<sup>18</sup>F]F-kryptofix (~1.3 Ci) for use.

### 5.2 General HPLC Conditions

Four general sets of HPLC conditions were used. Conditions A, B, C were normally used for HPLC yield calculation of different substrates. Condition D were used for [<sup>18</sup>F]labeled product purification.

#### HPLC Condition A:

Column: Phenomenex, Kinetex® 5μm EVO C18 100 Å, 250 x 4.6 mm LC Column.

Solvent A: 0.1%TFA water; Solvent B: 0.1%TFA acetonitrile;

Grad/isocrat: 0 to 2 min: 5% to 45% solvent B, 2 to 22 min: 45% to 50% solvent B, 22 to 28 min: 50% to 95% solvent B, 28 to 28.1 min: 95% to 5% solvent B, 28.1 to 30 min: isocratic elution at 5% solvent B.

Flow rate: 1 mL/min, column temperature: 19 to 21 °C.

#### HPLC Condition B:

Column: Phenomenex, Kinetex® 5μm EVO C18 100 Å, 250 x 4.6 mm LC Column.

Solvent A: 0.1%TFA water; Solvent B: 0.1%TFA acetonitrile;

Grad/isocrat: 0 to 2 min: 30% to 50% solvent B, 2 to 22 min: 50% to 50% solvent B, 22 to 28 min: 50% to 95% solvent B, 28 to 28.1 min: 95% to 30% solvent B, 28.1 to 30 min: isocratic elution at 30% solvent B.

Flow rate: 1 mL/min, column temperature: 19 to 21 °C.

#### HPLC Condition C:

Column: Phenomenex, Kinetex® 5μm EVO C18 100 Å, 250 x 4.6 mm LC Column.

Solvent A: 0.1%TFA water; Solvent B: 0.1%TFA acetonitrile;

Grad/isocrat: 0 to 2 min: isocratic elution at 5% solvent B, 2 to 22 min: 5% to 95% solvent B, 22 to 28 min: isocratic elution at 95% solvent B, 28 to 28.1 min: 95% to 5% solvent B, 28.1 to 30 min: isocratic elution at 5% solvent B.

Flow rate: 1 mL/min, column temperature: 19 to 21 °C.

#### HPLC Condition D:

Column: Phenomenex, Kinetex® 5μm F5 100 Å, 250 x 4.6 mm LC Column

Solvent A: 0.1%TFA water; Solvent B: 0.1%TFA acetonitrile;

Grad/isocrat: 0 to 2 min: 20% to 45% solvent B, 2 to 22 min: 45% to 60% solvent B, 22 to 28 min: 60% to 95% solvent B, 28 to 28.1 min: 95% to 20% solvent B, 28.1 to 30 min: isocratic elution at 20% solvent B.

Flow rate: 1 mL/min, column temperature: 19 to 21 °C.

### 5.3 General procedure for the synthesis of $^{18}\text{F}$ -fluoroarenes

General procedure A: Photocatalyst **1** (1.5mg, 0.0025mmol, 0.05 to 0.01 eq.), substrate (0.05 to 0.25mmol, 1.0eq.), TEMPO (3.9mg, 0.025mmol, 0.5 to 0.1 eq) were weighed into a 1.5mL microcentrifuge tube and dissolved in 50–70 $\mu\text{L}$  anhydrous MeCN and 400 $\mu\text{L}$  t-BuOH. The resulting solution was transferred to a 5mL v-vial via a pipette, and then a 30–50 $\mu\text{L}$  aliquot of  $^{18}\text{F}$ TBAF in MeCN (typically 10–30 mCi) [total volume of MeCN is 100 $\mu\text{L}$ ] was immediately added to the reaction vial via pipette. Decay in  $^{18}\text{F}$ TBAF activity was monitored upon addition of  $^{18}\text{F}$ TBAF to the substrate solution. The reaction v-vial was then fixed on an iron support and cooled to using an ice-acetone bath. A needle connected to an oxygen-filled balloon was inserted to the bottom of the v-vial and the reaction medium was continuously sparged with oxygen throughout the entire reaction time (30 min. to 1 h.). The reaction was then irradiated top-down with the optic fiber of an OEM blue diode laser (OEM-SD-450, 450 nm, 3.5W after fiber coupling) for 30 min to 1 h.  **$^{18}\text{F}$  activity was recorded at the end of the reaction.** The resulting solution was diluted with MeCN (0.3–0.5 mL). An aliquot of the reaction mixture (typically 400–800 $\mu\text{Ci}$ ) was taken for radio-HPLC analysis. The activity injected into HPLC was measured (this activity was denoted by  $\alpha$ ) and the time was recorded. The fraction corresponding to radiolabeled product was collected and the activity was measured (this activity was denoted by  $\beta$ ). The radiochemical yields of all  $^{18}\text{F}$ -labeled molecules were isolated via HPLC. The decay-corrected RCY were was calculated by dividing the decay-corrected  $\beta$  by  $\alpha$ . All RCY were calculated with respect to the starting  $^{18}\text{F}$  activity of the eluted fluoride.  $^{18}\text{F}$ -Radiolabeled products were confirmed by the co-injection of commercial or synthesized  $^{19}\text{F}$  standards via HPLC. General Method A (Section 3-3) was used for the positive identification of desired fluorinated congener; mass detection of the desired  $^{19}\text{F}$ -fluorination products indicates the compatibility of the arene for radiofluorination. Quality control (QC) was run separately to ensure the purity of isolated radiolabeled compounds.

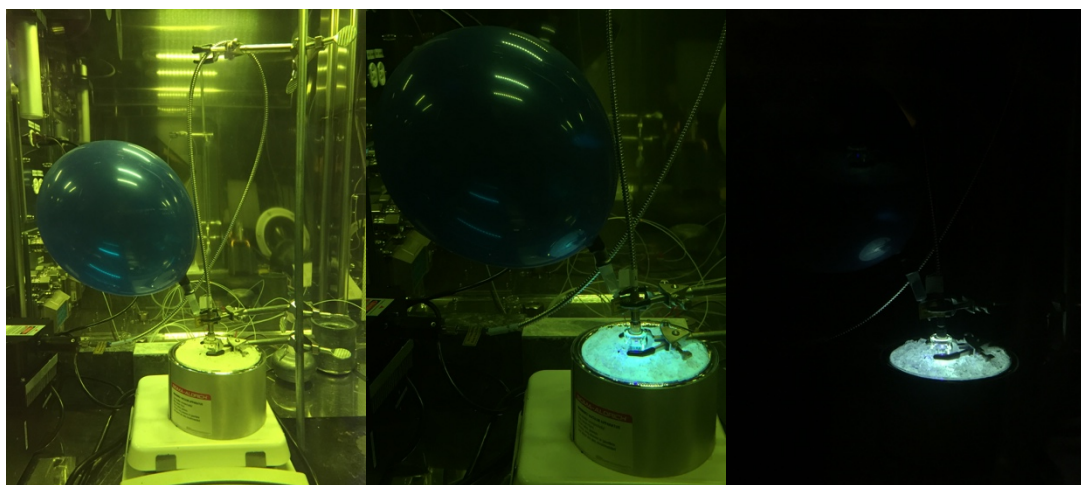

**Fig. S3.** Reaction set-up for photoredox-catalyzed arene radiofluorination

#### 5.4 Comparison of isolation, radio-TLC and radio-HPLC yields for the radiofluorination of diphenyl ether.

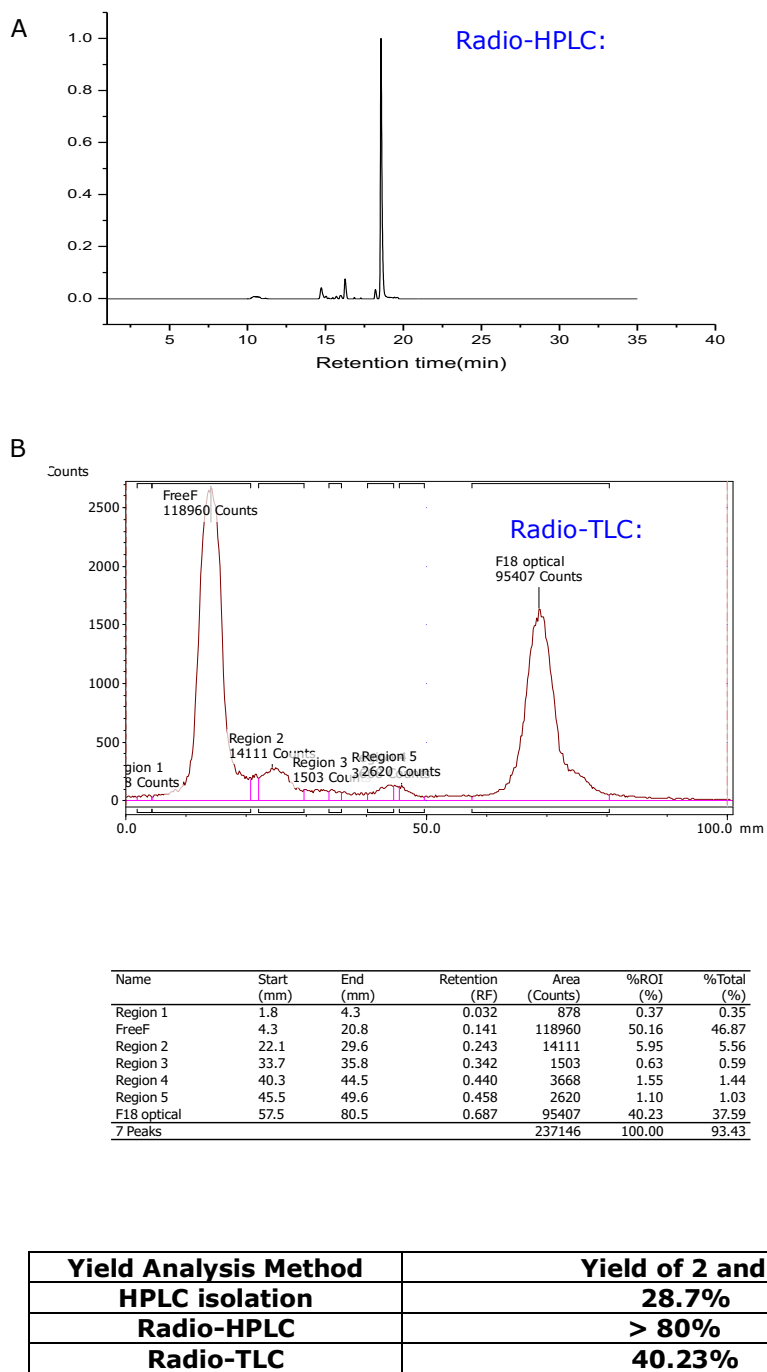

**Fig. S4.** Comparison of isolation, radio-HPLC (**A**) and radio-TLC (**B**) yields for the radio-fluorination of diphenyl ether with corresponding yields (**C**).

## 5.5 Summary of Reaction Optimization for Arene Radiofluorination

### 5.5.1 Evaluation of fluorine sources

#### 5.5.1.1 $^{18}\text{F}$ -CsF as the fluorine source:

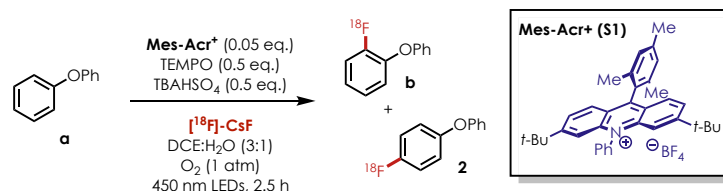

#### Method A:

Photocatalyst **S1** (1.5mg, 0.0025mmol, 0.05eq.), diphenyl ether (8.5mg, 0.05mmol, 1.0eq.), TBAHSO<sub>4</sub> (8.5mg, 0.025mmol, 0.5eq.), TEMPO (3.9mg, 0.025mmol, 0.5eq.) were weighed into a 2.5mL dried glass vial equipped with a stir bar and dissolved in 225μL DCE. The vial was then sealed with a Teflon-lined septum screw cap. The septum was then pierced with a disposable steel needle connected to an oxygen-filled balloon. A vent needle was inserted and the reaction medium was sparged for 1 min by bubbling oxygen through the mixture. Then the vent needle was removed, and the oxygen balloon was maintained, providing approximately 1 atm of oxygen to the vial headspace for the course of the reaction. Then a 75μL aliquot of [ $^{18}\text{F}$ ]CsF in H<sub>2</sub>O (typically 10-30 mCi, see section 5.1.2) was added to the reaction vial via syringe. The reaction flask was then placed on a stir plate and illuminated with blue LED lamps (450 nm). After 2.5 h, an aliquot of the reaction mixture (typically 400-800μCi) was taken for radio-HPLC analysis using HPLC condition B and the isolated and decay-corrected yield was calculated. The isolated yields of **2** and **b** are listed in Table S3.

#### Method B:

Photocatalyst **S1** (1.5mg, 0.0025mmol, 0.05eq.), diphenyl ether (8.5mg, 0.05mmol, 1.0eq.), TBAHSO<sub>4</sub> (8.5mg, 0.025mmol, 0.5eq.), TEMPO (3.9mg, 0.025mmol, 0.5eq.), CsCl (4.2mg, 0.025mmol, 0.5eq.) or CsF (7.6mg, 0.05mmol, 1.0eq.) were weighed into a 2.5mL dried glass vial equipped with a stir bar and dissolved in 175μL DCE and 75μL H<sub>2</sub>O. The vial was then sealed with a Teflon-lined septum screw cap. The septum was then pierced with a disposable steel needle connected to an oxygen-filled balloon. A vent needle was inserted and the reaction medium was sparged for 1 min by bubbling oxygen through the mixture. Then the vent needle was removed, and the oxygen balloon was maintained, providing approximately 1 atm of oxygen to the vial headspace for the course of the reaction. Then a 50μL aliquot of [ $^{18}\text{F}$ ]TBAF in DCE (typically 10-30 mCi, see section 5.1.2) was added to the reaction vial via syringe. The reaction flask was then placed on a stir plate and illuminated with blue LED lamps (450 nm). After 2.5 h, an aliquot of the reaction mixture (typically 400-800μCi) was taken for radio-HPLC analysis using HPLC condition B and the isolated and decay-corrected yield was calculated. The isolated yields of **2** and **b** are listed in Table S3.

#### 5.5.1.2 $^{18}\text{F}$ -TBAF as the fluorine source:

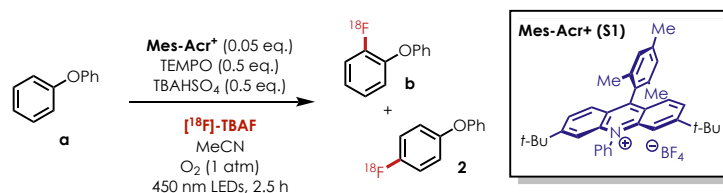

Photocatalyst **S1** (1.5mg, 0.0025mmol, 0.05eq.), diphenyl ether (8.5mg, 0.05mmol, 1.0eq.), TBAHSO<sub>4</sub> (3.9mg, 0.025mmol, 0.5eq.) and TEMPO (3.9mg, 0.025mmol, 0.5eq.) were weighed into a 2.5mL dried glass vial equipped with a stir bar and dissolved in 400μL anhydrous MeCN. The vial was then sealed with a Teflon-lined septum screw cap. The septum was then pierced with a disposable steel needle connected to an oxygen-filled balloon. A vent needle was inserted and the reaction

medium was sparged for 1 min by bubbling oxygen through the mixture. Then the vent needle was removed, and the oxygen balloon was maintained, providing approximately 1 atm of oxygen to the vial headspace for the course of the reaction. Then a 100 $\mu$ L aliquot of [ $^{18}$ F]TBAF in anhydrous MeCN (typically 10-30 mCi, see section 5.1.2) was added to the reaction vial via syringe. The reaction flask was then placed on a stir plate and illuminated with blue LED lamps (450 nm). After 2.5 h, an aliquot of the reaction mixture (typically 400-800 $\mu$ Ci) was taken for radio-HPLC analysis using HPLC condition B and the isolated and decay-corrected yield was calculated. The isolated yields of **2** and **b** are listed in Table S3.

#### 5.5.1.3 $^{18}$ F-KF as the fluorine source:

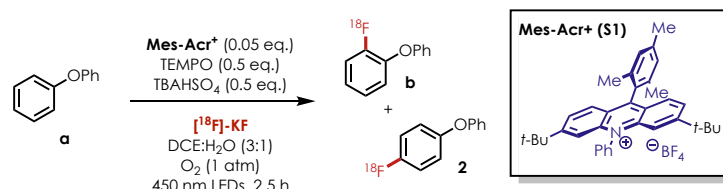

Photocatalyst **S1** (1.5mg, 0.0025mmol, 0.05eq.), diphenyl ether (8.5mg, 0.05mmol, 1.0eq.), TBAHSO $_4$  (8.5mg, 0.025mmol, 0.5eq.), TEMPO (3.9mg, 0.025mmol, 0.5eq.) were weighed into a 2.5mL dried glass vial equipped with a stir bar and dissolved in 225 $\mu$ L DCE. The vial was then sealed with a Teflon-lined septum screw cap. The septum was then pierced with a disposable steel needle connected to an oxygen-filled balloon. A vent needle was inserted and the reaction medium was sparged for 1 min by bubbling oxygen through the mixture. Then the vent needle was removed, and the oxygen balloon was maintained, providing approximately 1 atm of oxygen to the vial headspace for the course of the reaction. Then a 75 $\mu$ L aliquot of [ $^{18}$ F]KF in H $_2$ O (typically 10-30 mCi, see section 5.1.2, which was eluted from QMA with 0.9% potassium perchlorate) was added to the reaction vial via syringe. The reaction flask was then placed on a stir plate and illuminated with blue LED lamps (450 nm). After 2.5 h, an aliquot of the reaction mixture (typically 400-800 $\mu$ Ci) was taken for radio-HPLC analysis using HPLC condition B and the isolated and decay-corrected yield was calculated. The isolated yields of **2** and **b** are listed in Table S3.

#### 5.5.1.4 K[ $^{18}$ F]F-kryptofix as the fluorine source:

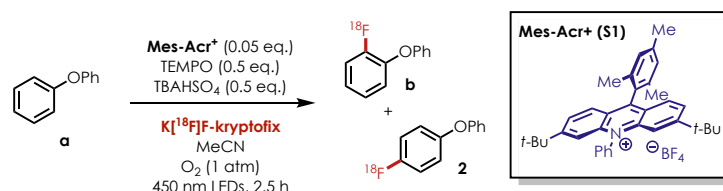

Photocatalyst **S1** (1.5mg, 0.0025mmol, 0.05eq.), diphenyl ether (8.5mg, 0.05mmol, 1.0eq.), TBAHSO $_4$  (3.9mg, 0.025mmol, 0.5eq.), TEMPO (3.9mg, 0.025mmol, 0.5eq.) were weighed into a 2.5mL dried glass vial equipped with a stir bar and dissolved in 400 $\mu$ L anhydrous MeCN. The vial was then sealed with a Teflon-lined septum screw cap. The septum was then pierced with a disposable steel needle connected to an oxygen-filled balloon. A vent needle was inserted and the reaction medium was sparged for 1 min by bubbling oxygen through the mixture. Then the vent needle was removed, and the oxygen balloon was maintained, providing approximately 1 atm of oxygen to the vial headspace for the course of the reaction. Then a 100 $\mu$ L aliquot of K[ $^{18}$ F]F-kryptofix in anhydrous MeCN (typically 10-30 mCi, see section 5.1.2) was added to the reaction vial via syringe. The reaction flask was then placed on a stir plate and illuminated with blue LED lamps (450 nm). After 2.5 h, an aliquot of the reaction mixture (typically 400-800 $\mu$ Ci) was taken for radio-HPLC analysis using HPLC condition B and the isolated and decay-corrected yield was calculated. The isolated yields of **2** and **b** are listed in Table S3.

| Entry | <sup>18</sup> F-Fluoride                                                                                                | Isolated yield of <b>2</b> * | Isolated yield of <b>b</b> * |
|-------|-------------------------------------------------------------------------------------------------------------------------|------------------------------|------------------------------|
| 1     | <b><sup>18</sup>F-CsF</b> (First Method: <sup>18</sup> F on QMA was eluted with 0.9% CsCl)                              | Trace                        | nd                           |
| 2     | <b><sup>18</sup>F-CsF</b> (Second Method: <sup>18</sup> F on QMA was eluted with 0.9% Cs <sub>2</sub> CO <sub>3</sub> ) | nd                           | nd                           |
| 3     | <b><sup>18</sup>F-CsF</b> (Third Method: <sup>18</sup> F on QMA was eluted with 0.9% CsF)                               | nd                           | nd                           |
| 4     | <b><sup>18</sup>F-CsF</b> (Fourth Method: [ <sup>18</sup> F]TBAF mixed with CsCl)                                       | nd                           | nd                           |
| 5     | <b><sup>18</sup>F-CsF</b> (Fifth Method: [ <sup>18</sup> F]TBAF mixed with CsF)                                         | nd                           | nd                           |
| 6     | <b><sup>18</sup>F-TBAF</b>                                                                                              | 0.572%                       | trace                        |
| 7     | <b><sup>18</sup>F-KF</b> ( <sup>18</sup> F on QMA was eluted with 0.9% KClO <sub>4</sub> )                              | nd                           | nd                           |
| 8     | <b>K[<sup>18</sup>F]F-kryptofix</b>                                                                                     | 0.39%                        | trace                        |

\*nd = not detected

**Table S3.** Evaluation of <sup>18</sup>F-fluoride sources for the direct C–H fluorination of diphenyl ether.

### 5.5.2 Evaluation of Irradiation sources

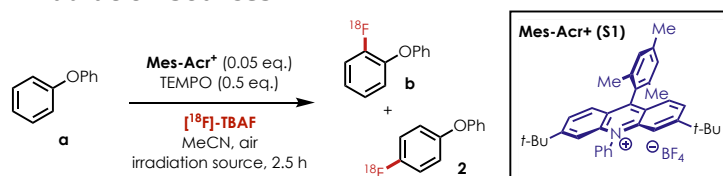

#### 5.5.2.1 Laser as the light source

Photocatalyst **S1** (1.5mg, 0.0025mmol, 0.05eq.), diphenyl ether (8.5mg, 0.05mmol, 1.0eq.), TEMPO (3.9mg, 0.025mmol, 0.5eq.) were weighed into a 2.5mL dried glass vial and dissolved in 400μL anhydrous MeCN. The resulting solution was transferred to a 5mL v-vial sealed via a 200μL pipette, and a 100μL aliquot of [<sup>18</sup>F]TBAF in MeCN (typically 10-30 mCi, prepared as described above) was added to the reaction vial via pipette. After counting the activity added, the reaction v-vial was fixed on an iron support and cooled to 0°C by using ice-acetone bath. Then the surface of reaction medium was irradiated directly with a laser spot from the optic fiber of an OEM blue diode laser (OEM-SD-450, 450nm, the power is 1.0 W after fiber coupling). Irradiation was carried out for 2.5 h. The resulting solution was diluted with MeCN (0.5 mL). An aliquot of the reaction mixture (typically 400-800μCi) was taken for radio-HPLC analysis using HPLC condition B and the isolated and decay-corrected yield was calculated. The isolated yields of **2** and **b** are listed in Table S4.

| Entry | Light source       | Isolated yield of <b>2</b> | Isolated yield of <b>b</b> |
|-------|--------------------|----------------------------|----------------------------|
| 1     | <b>455nm LEDs</b>  | 0.572%                     | trace                      |
| 2     | <b>450nm Laser</b> | 28.6%                      | 1.33%                      |

**Table S4.** Evaluation of irradiation sources for the direct C–H fluorination of diphenyl ether.

### 5.5.3 Evaluation of time-dependent laser power rating

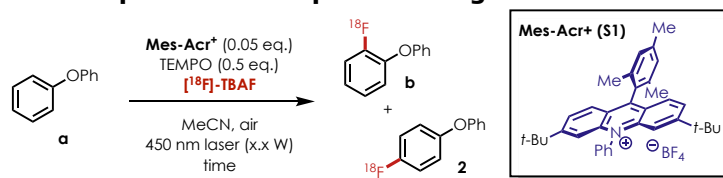

The reaction was run under the same conditions as the procedure in **5.5.2.1**. The laser power rating was set at 1.0 W and 3.5 W (maximum power of the laser) respectively and the reaction was analyzed by HPLC every 30 minutes. The isolated yields of **2** and **b** are listed in Table S5.

| Entry | Laser power rating | Reaction time | Isolated yield of <b>2</b> | Isolated yield of <b>b</b> |
|-------|--------------------|---------------|----------------------------|----------------------------|
| 1     | <b>1.0 W</b>       | 30min         | 2.67%                      | Trace                      |
| 2     |                    | 60min         | 7.68%                      | 0.64%                      |
| 3     |                    | 90min         | 11.98%                     | 1.60%                      |
| 4     |                    | 120min        | 19.38%                     | 1.78%                      |
| 5     |                    | 150min        | 25.74%                     | 2.64%                      |
| 6     | <b>3.5 W</b>       | 30min         | 8.23%                      | 0.24%                      |
| 7     |                    | 60min         | 12.44%                     | 0.90%                      |
| 8     |                    | 90min         | 16.20%                     | 1.39%                      |
| 9     |                    | 120min        | 19.16%                     | 1.70%                      |
| 10    |                    | 150min        | 20.40%                     | 2.04%                      |

**Table S5.** Evaluation of laser power rating for the direct C–H fluorination of diphenyl ether.

### 5.5.4 Evaluation of TEMPO loading

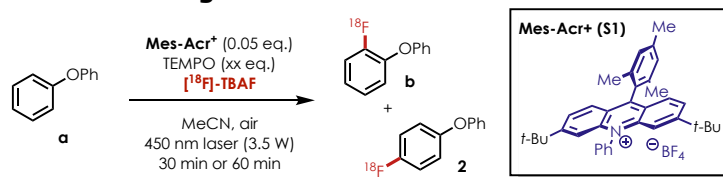

The reaction was run under the same conditions as the procedure in 5.5.2.1, with the laser power rating set at 3.5 W. TEMPO loadings from 3.9 mg (0.025 mmol, 0.5 eq.) to 7.8 mg (0.05 mmol, 1.0 eq.) were analyzed. The reaction was analyzed by HPLC after 30 and 60 minutes of irradiation. The isolated yields of **2** and **b** are listed in Table S6.

| Entry | TEMPO Loading   | Reaction time | Isolated yield of <b>2</b> | Isolated yield of <b>b</b> |
|-------|-----------------|---------------|----------------------------|----------------------------|
| 1     | 3.9 mg (0.5 eq) | 30min         | 8.23%                      | 0.24%                      |
| 2     |                 | 60min         | 12.44%                     | 0.90%                      |
| 3     | 7.8 mg (1.0 eq) | 30min         | 5.96%                      | 0.13%                      |
| 4     |                 | 60min         | 8.07%                      | 0.62%                      |

**Table S6.** Evaluation of TEMPO loading for the direct C–H fluorination of diphenyl ether.

### 5.5.5 Evaluation of catalyst loading

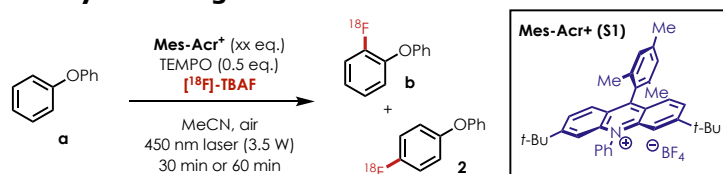

The reaction was run under the same conditions as the procedure in 5.5.2.1, with the laser power rating set at 3.5W. Photocatalyst (**S1**) loadings from 3.9mg (0.025mmol, 0.5eq.) to 7.8mg (0.05mmol, 1.0eq.) were analyzed. The reaction was analyzed by HPLC after 30 and 60 minutes of irradiation. The isolated yields of **2** and **b** are listed in Table S7.

| Entry | Catalyst Loading      | Reaction time | Isolated yield of <b>2</b> | Isolated yield of <b>b</b> |
|-------|-----------------------|---------------|----------------------------|----------------------------|
| 1     | <b>1.5mg (0.05eq)</b> | 30min         | 8.23%                      | 0.24%                      |
| 2     |                       | 60min         | 12.44%                     | 0.90%                      |
| 3     | <b>3.0mg (0.1eq)</b>  | 30min         | 8.78%                      | 0.20%                      |
| 4     |                       | 60min         | 15.60%                     | 0.82%                      |

**Table S7.** Evaluation of photocatalyst loading for the direct C–H fluorination of diphenyl ether.

### 5.5.6 Evaluation of reaction atmosphere

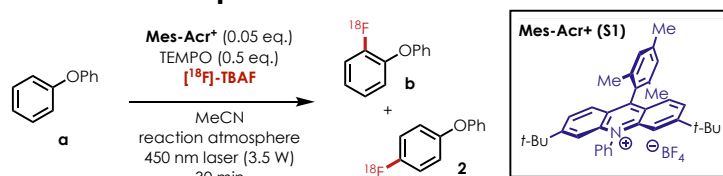

The reaction was run under the same conditions as the procedure in 5.5.2.1, with the laser power rating set at 3.5W. The reaction solution was either sparged with O<sub>2</sub> or N<sub>2</sub> for the entirety of the reaction. The reaction was analyzed by HPLC after 30 and 60 minutes of irradiation. The isolated yields of **2** and **b** are listed in Table S8.

| Entry | Atmosphere                | Reaction time | Isolated yield of <b>2</b> | Isolated yield of <b>b</b> |
|-------|---------------------------|---------------|----------------------------|----------------------------|
| 1     | Air (Stationary contact)  | 30min         | 8.23%                      | 0.24%                      |
| 2     |                           | 60min         | 12.44%                     | 0.90%                      |
| 3     | O <sub>2</sub> (bubbling) | 30min         | 25.84%                     | 2.01%                      |
| 4     | N <sub>2</sub> (bubbling) | 30min         | 2.79%                      | Trace                      |

**Table S8.** Evaluation of reaction atmosphere for the direct C–H fluorination of diphenyl ether.

### 5.5.8 Solvent Screening

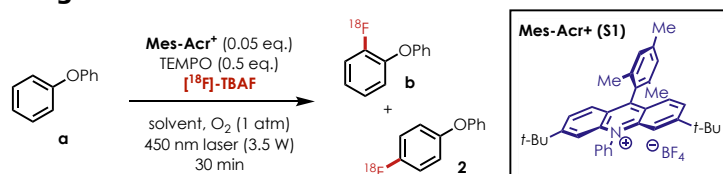

The reaction was run under the same conditions as the procedure in 5.5.2.1, with the laser power rating set at 3.5W. The reaction solution was sparged with O<sub>2</sub> for the entirety of the reaction. The isolated yields of **2** and **b** are listed in Table S9.

| Entry | Solvent                                  | Isolated yield of <b>2</b> * | Isolated yield of <b>b</b> * |
|-------|------------------------------------------|------------------------------|------------------------------|
| 1     | MeCN                                     | 25.84%                       | 2.01%                        |
| 2     | DCE <sup>†</sup>                         | 8.97%                        | 0.27%                        |
| 3     | DMSO                                     | nd                           | nd                           |
| 4     | DMF                                      | nd                           | nd                           |
| 5     | THF                                      | 0.27%                        | nd                           |
| 6     | MeOH                                     | nd                           | nd                           |
| 7     | MeCN:t-BuOH=1:4<br>(Catalyst <b>S1</b> ) | 37.1±12% (n=5)               | 2±1% (n=5)                   |
| 8     | MeCN:t-BuOH=1:4<br>(Catalyst <b>1</b> )  | 38.2±10% (n=5)               | 1.75±0.7% (n=5)              |
| 9     | t-BuOH                                   | 1.95%                        | trace                        |

\* nd = not detected; <sup>†</sup>The reaction time is 25min, because DCE volatilized completely.

**Table S9.** Evaluation of reaction solvent for the direct C–H fluorination of diphenyl ether.

### 5.5.9 Miscellaneous optimizations

The reactions below were run under these conditions unless specified otherwise:

The catalyst **S1** (1.5mg, 0.0025mmol, 0.05eq.), diphenyl ether (8.5mg, 0.05mmol, 1.0eq.), TEMPO (3.9mg, 0.025mmol, 0.5eq.) were weighed into a 2.5mL dried glass vial and dissolved in 500μL MeCN:t-BuOH=1:4. The resulting solution was transferred to a 5mL v-vial sealed via a 200μL pipette, and a 100μL aliquot of [<sup>18</sup>F]TBAF in MeCN (typically 10–30 mCi, prepared as described above) was added to the reaction vial via pipette. After counting the activity added, the reaction v-vial was fixed on an iron support and cooled to 0°C by using ice-acetone bath. The reaction solution was then sparged with O<sub>2</sub> before the surface of reaction medium was irradiated directly with a laser spot from the optic fiber of an OEM blue diode laser (OEM-SD-450, 450nm, the power is 3.5 W after fiber coupling). The reaction solution was kept under an O<sub>2</sub> sparge for the remainder of reaction irradiation (30 mins). The resulting solution was diluted with MeCN (0.5 mL). An aliquot of the reaction mixture (typically 400–800μCi) was taken for radio-HPLC analysis using HPLC condition B and the isolated and decay-corrected yield was calculated. The isolated yields of **2** and **b** are listed in the corresponding tables.

#### 5.5.9.1 Evaluation of substrate concentration

(A) **S1** (1.5mg, 2.5μmol), diphenyl ether (8.5mg, 50μmol), TEMPO (3.9mg, 25μmol)

(B) **S1** (1.5mg, 2.5μmol), diphenyl ether (1.7mg, 10μmol), TEMPO (3.9mg, 25μmol)

(C) **S1** (0.3mg, 0.5μmol), diphenyl ether (1.7mg, 10μmol), TEMPO (0.8mg, 5μmol)

| Entry | Condition | Isolated yield of 2 | Isolated yield of b |
|-------|-----------|---------------------|---------------------|
| 1     | A         | 37.1±12% (n=5)      | 2±1% (n=5)          |
| 2     | B         | 7.88%               | 0.30%               |
| 3     | C         | 5.57%               | 0.24%               |

**Table S10.** Evaluation of substrate concentration for the direct C–H fluorination of diphenyl ether.

#### 5.5.9.2 Reaction controls

| Entry | Condition      | Isolated yield of 2* | Isolated yield of b* |
|-------|----------------|----------------------|----------------------|
| 1     | Model reaction | 37.1±12% (n=5)       | 2±1% (n=5)           |
| 2     | No TEMPO       | 3.04%                | 0.18%                |
| 3     | No catalyst    | nd                   | nd                   |

\* nd = not detected

**Table S11.** Reaction controls for the direct C–H fluorination of diphenyl ether.

#### 5.5.9.3 Evaluation of excess water

| Entry | Condition                | Isolated yield of 2 | Isolated yield of b |
|-------|--------------------------|---------------------|---------------------|
| 1     | Model reaction           | 37.1±12% (n=5)      | 2±1% (n=5)          |
| 2     | With 5% H <sub>2</sub> O | 4.83%               | 0.40%               |

**Table S12.** Impact of excess water on the direct C–H fluorination of diphenyl ether.

#### 5.5.9.4 Expansion of compatible [<sup>18</sup>F] sources under optimized conditions

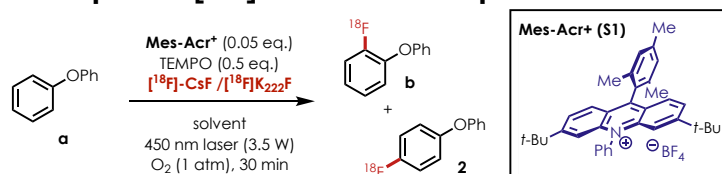

[<sup>18</sup>F]CsF and [<sup>18</sup>F]K<sub>222</sub>F were generated according to the procedures in 5.5.1

| Entry | Condition                                                                                  | Isolated yield of 2 | Isolated yield of b |
|-------|--------------------------------------------------------------------------------------------|---------------------|---------------------|
| 1     | [ <sup>18</sup> F]CsF as the fluorine source and t-BuOH as the solvent                     | 21.2%               | 0.83%               |
| 2     | [ <sup>18</sup> F]K <sub>222</sub> F as the fluorine source and t-BuOH/MeCN as the solvent | 26.2%               | 1.5%                |

**Table S13.** Compatibility of [<sup>18</sup>F]CsF and [<sup>18</sup>F]K<sub>222</sub>F for the direct C–H fluorination of diphenyl ether.

### 5.5.10 Molar activity calculations

Molar activity (the measured radioactivity per mole of compound) was calculated using a standard curve of the corresponding fluorinated arene. An example for calculating molar activity is shown below. A  $^{19}\text{F}$  standard curve [Y axis = UV area, X axis = mass( $\mu\text{g}$ )] was created from the HPLC trace for a standard solution of 1-fluoro-4-phenoxybenzene. The radiolabeled product was collected and purified via HPLC; the UV area overlapping with radio peak was then recorded. The standard curve was used to calculate the mass and mole number. Dividing the product activity by the mole number gives the molar activity in  $\text{Ci}/\mu\text{mol}$ . In this example,  $[^{18}\text{F}]$ -1-fluoro-4-phenoxybenzene isolated has a molar activity of  $1.37\text{Ci}/\mu\text{mol}$ , which is decay corrected from the end of bombardment (EOB).

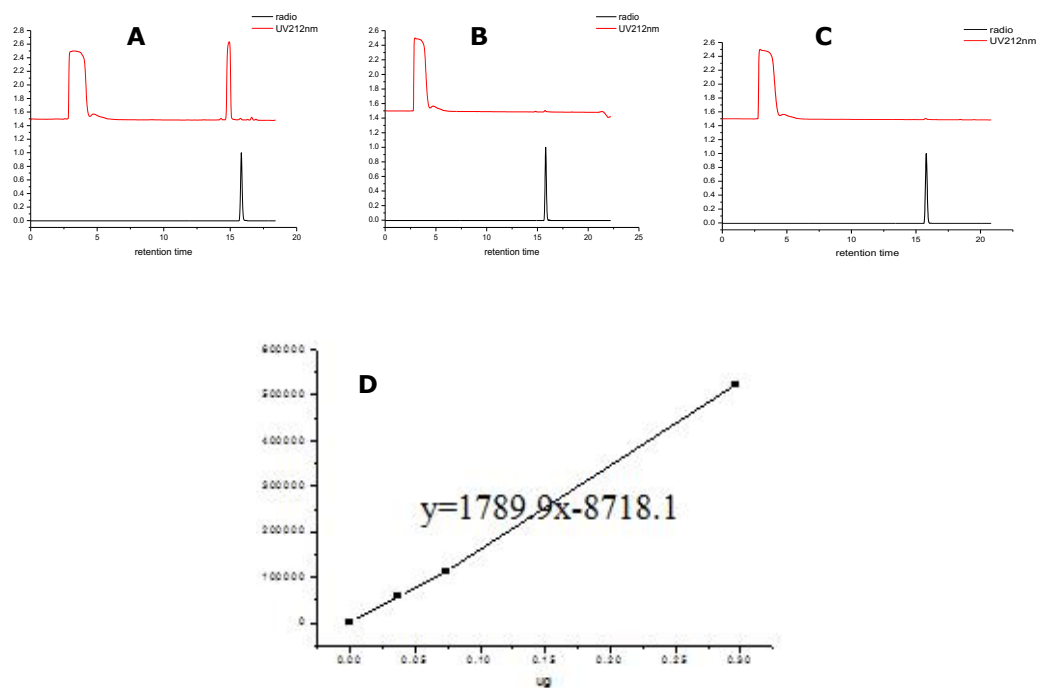

**E**

| Trace    | Injected dose (p-product) | Integral Area | Molar activity Decay corrected (EOB) |
|----------|---------------------------|---------------|--------------------------------------|
| <b>A</b> | 115 $\mu\text{Ci}$        | 817897        | 1.28 $\text{Ci}/\mu\text{mol}$       |
| <b>B</b> | 85 $\mu\text{Ci}$         | 627625        | 1.48 $\text{Ci}/\mu\text{mol}$       |
| <b>C</b> | 63 $\mu\text{Ci}$         | 593897        | 1.36 $\text{Ci}/\mu\text{mol}$       |

**Fig. S5.** Radio-HPLC and UV traces for  $[^{18}\text{F}]$ -1-fluoro-4-phenoxybenzene (**A, B, C**); standard curve generated from the UV traces (**D**); calculation of molar activity using the standard curve (**E**)

## 5.6 Radio-HPLC analysis and characterization for $^{18}\text{F}$ -radiolabeled arenes

**5.6.1 General information:** All the labelling reactions are carried out using general procedure A from the section 5.3 unless specified otherwise. The amounts of photocatalyst **1** (1.5mg.) and TEMPO (3.9mg) were kept consistent for all radiolabeling experiments. The respective molar equivalents of **1** and TEMPO (with respect to the arenes) are as follows: 1) Arene (0.05 mmol/0.10 mmol/0.125 mmol/0.25 mmol); 2) Photocatalyst **1** (0.05 eq./0.025 eq./0.02 eq./0.01 eq.); 3) TEMPO (0.5eq. /0.25eq. /0.2eq. /0.1eq.) Three replicate experiments were used to calculate RCYs (five replicates were run for **2**). The co-injection of the hot product and standard are offset by 0.04-0.06 min due to the distance of the UV and radio detector. The red HPLC traces in the following spectra were obtained with a UV signal at 212nm. The black HPLC traces are the radio signal for the crude and isolated radiolabeled products. HPLC conditions for analysis and purification are listed for each radiolabeled product.

The following fluorination standards were obtained from commercial vendors and used as received: 4-fluorophenoxybenzene (**2**), 4-fluorobiphenyl (**3**), 1-fluoronaphthalene (**4**), 2-bromo-4-fluoroanisole (**5**), 2-chloro-4-fluoroanisole (**6**), methyl 5-fluoro-2-methoxybenzoate (**8**), 1-(5-fluoro-2-methoxyphenyl)ethenone (**9**), 5-fluoro-2-methoxybenzonitrile (**10**), 5-fluoro-2-methoxybenzaldehyde (**11**), 3-fluoro-4-methoxybenzaldehyde (**15**), 1-(3-fluoro-4-methoxyphenyl)ethenone (**16**), methyl 3-fluoro-4-methoxybenzoate (**18**), 1-(4-fluoro-3-methoxyphenyl)ethenone (**20**, [**4-F**]) and 2-fluoromesitylene (**25**). The preparation of aromatic fluorinated standards (**7**, **12**, **13**, **14**, **17**, **19**, **20** [**2-F**], **21-24**, **26-42**) are found in section 3.3.

**5.6.2 Radio-HPLC traces for  $^{18}\text{F}$ -radiolabeled arenes, decay corrected isolated radiochemical yields (RCY), Radio-HPLC traces for quality control (QC) and co-injection, and HPLC conditions for isolating the corresponding  $^{18}\text{F}$ -radiolabeled arenes.**

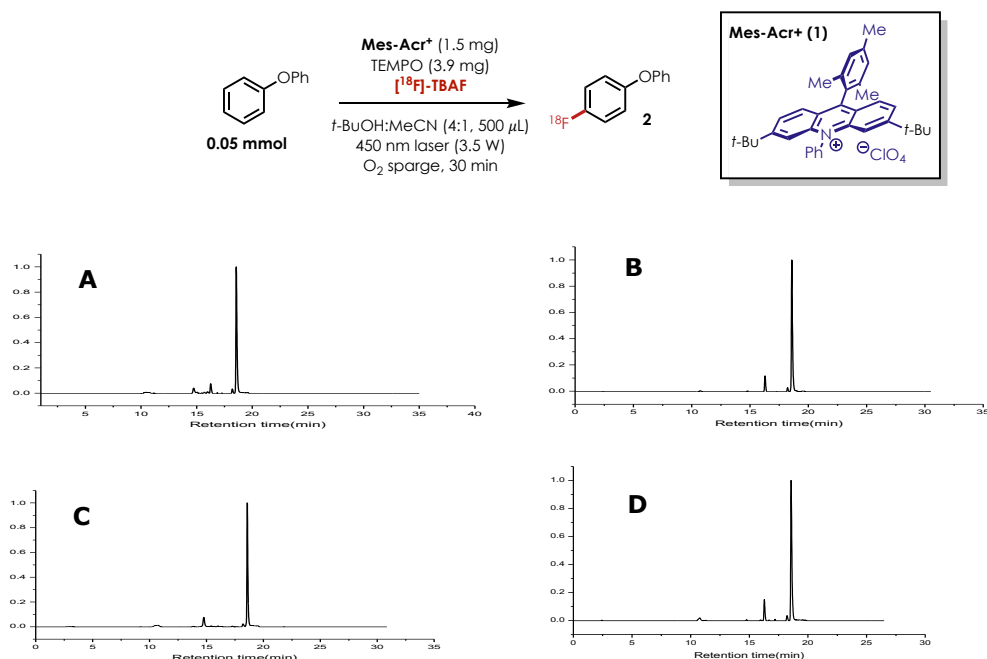

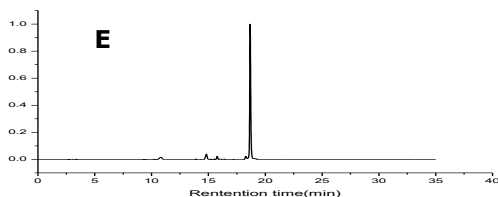

**Fig. S6** Radio-HPLC traces for **2**

HPLC condition: Column: Phenomenex, Kinetex® 5µm EVO C18 100 Å, 250 x 4.6 mm LC Column. Solvent A: 0.1%TFA water; Solvent B: 0.1%TFA acetonitrile; Grad/isocrat: 0 to 2 min: isocratic elution at 5% solvent B, 2 to 22 min: 5% to 95% solvent B, 22 to 28 min: isocratic elution at 95% solvent B, 28 to 28.1 min: 95% to 5% solvent B, 28.1 to 30 min: isocratic elution at 5% solvent B. Flow rate: 1 mL/min, column temperature: 19 to 21 °C.

| Run number     | RCY(Decay corrected) <b>2</b> | RCY(Decay corrected) <b>b</b> |
|----------------|-------------------------------|-------------------------------|
| Run 1          | 32.0%                         | 1.7%                          |
| Run 2          | 40.9%                         | 1.9%                          |
| Run 3          | 49.6%                         | 2.8%                          |
| Run 4          | 30.0%                         | 1.2%                          |
| Run 5          | 38.7%                         | 1.3%                          |
| <b>Average</b> | <b>38.2±10%</b>               | <b>1.8±1%</b>                 |

**Table S14.** Average radiochemical yields for **2** and **b**

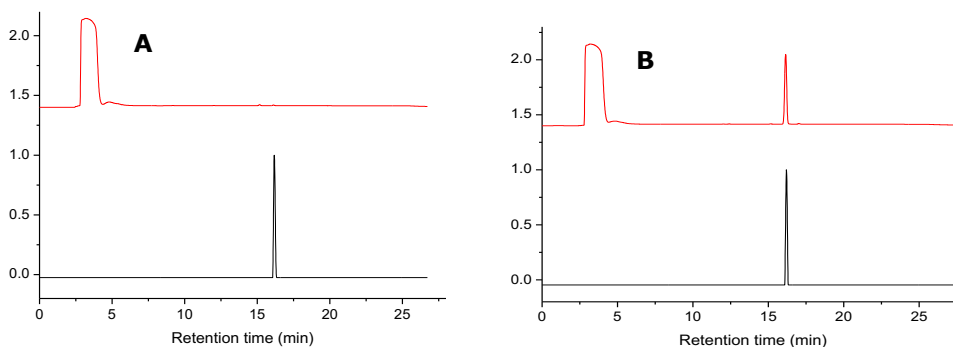

**Fig. S7.** HPLC traces of QC (**A**) and co-injection (**B**) for **2**

HPLC condition: Column: Phenomenex, Kinetex® 5µm F5 100 Å, 250 x 4.6 mm LC Column. Solvent A: 0.1%TFA water; Solvent B: 0.1%TFA acetonitrile; Grad/isocrat: 0 to 2 min: 20% to 45% solvent B, 2 to 22 min: 45% to 60% solvent B, 22 to 28 min: 60% to 95% solvent B, 28 to 28.1 min: 95% to 20% solvent B, 28.1 to 30 min: isocratic elution at 20% solvent B. Flow rate: 1 mL/min, column temperature: 19 to 21 °C.

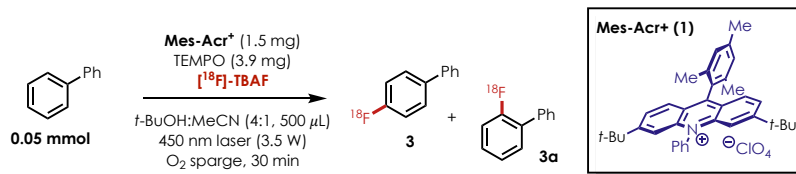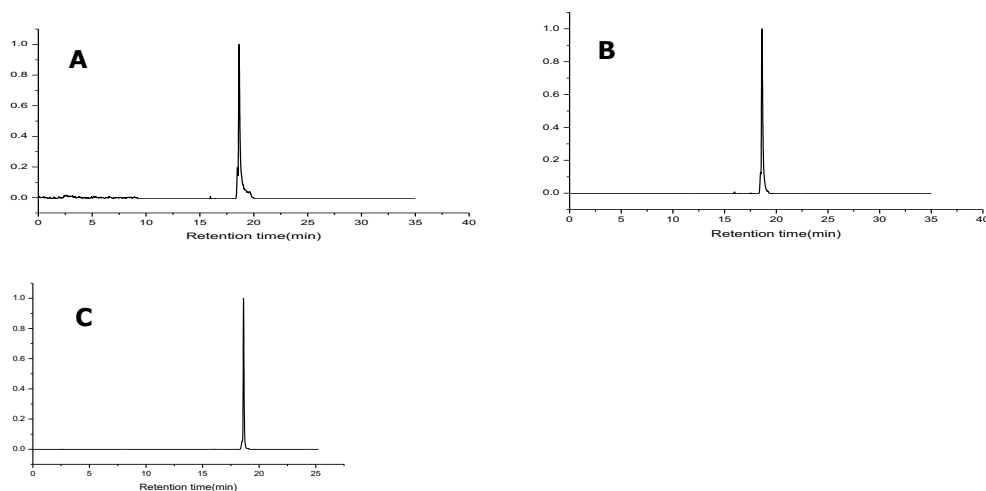

**Fig. S8.** Radio-HPLC traces of **3**

HPLC condition: Column: Phenomenex, Kinetex® 5μm F5 100 Å, 250 x 4.6 mm LC Column. Solvent A: 0.1%TFA water; Solvent B: 0.1%TFA acetonitrile; Grad/isocrat: 0 to 2 min: 20% to 45% solvent B, 2 to 22 min: 45% to 60% solvent B, 22 to 28 min: 60% to 95% solvent B, 28 to 28.1 min: 95% to 20% solvent B, 28.1 to 30 min: isocratic elution at 20% solvent B. Flow rate: 1 mL/min, column temperature: 19 to 21 °C.

| Run number | RCY(Decay corrected) <b>3</b> |
|------------|-------------------------------|
| Run 1      | 30.6%                         |
| Run 2      | 50.6%                         |
| Run 3      | 36.7%                         |
| Average    | <b>39.3±10%</b>               |

**Table S15.** Average radiochemical yields for **3**

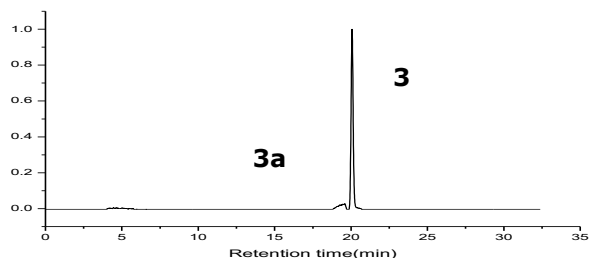

**Fig. S9.** Radio-HPLC trace of **3a** (left peak) and **3** (right peak)

HPLC condition: Column: Phenomenex, Kinetex® 5µm EVO C18 100 Å, 250 x 4.6 mm LC Column. Solvent A: 0.1%TFA water; Solvent B: 0.1%TFA acetonitrile; Grad/isocrat: 0 to 2 min: isocratic elution at 5% solvent B, 2 to 22 min: 5% to 95% solvent B, 22 to 28 min: isocratic elution at 95% solvent B, 28 to 28.1 min: 95% to 5% solvent B, 28.1 to 30 min: isocratic elution at 5% solvent B. Flow rate: 1 mL/min, column temperature: 19 to 21 °C.

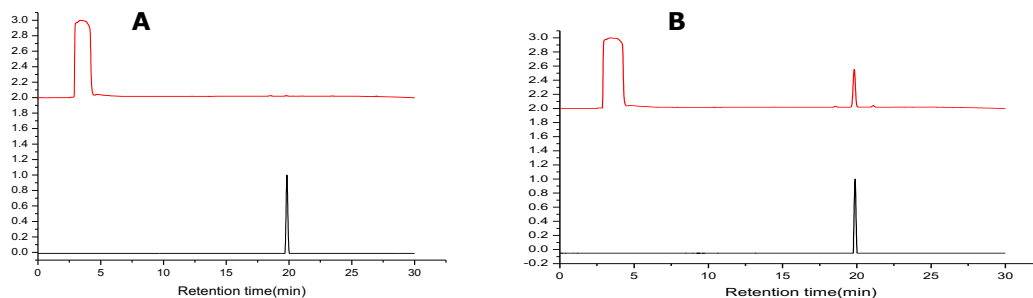

**Fig. S10.** HPLC traces of QC(A) and co-injection(B) for **3**

HPLC condition: Column: Phenomenex, Kinetex® 5µm F5 100 Å, 250 x 4.6 mm LC Column. Solvent A: 0.1%TFA water; Solvent B: 0.1%TFA acetonitrile; Grad/isocrat: 0 to 2 min: 20% to 45% solvent B, 2 to 22 min: 45% to 60% solvent B, 22 to 28 min: 60% to 95% solvent B, 28 to 28.1 min: 95% to 20% solvent B, 28.1 to 30 min: isocratic elution at 20% solvent B. Flow rate: 1 mL/min, column temperature: 19 to 21 °C.

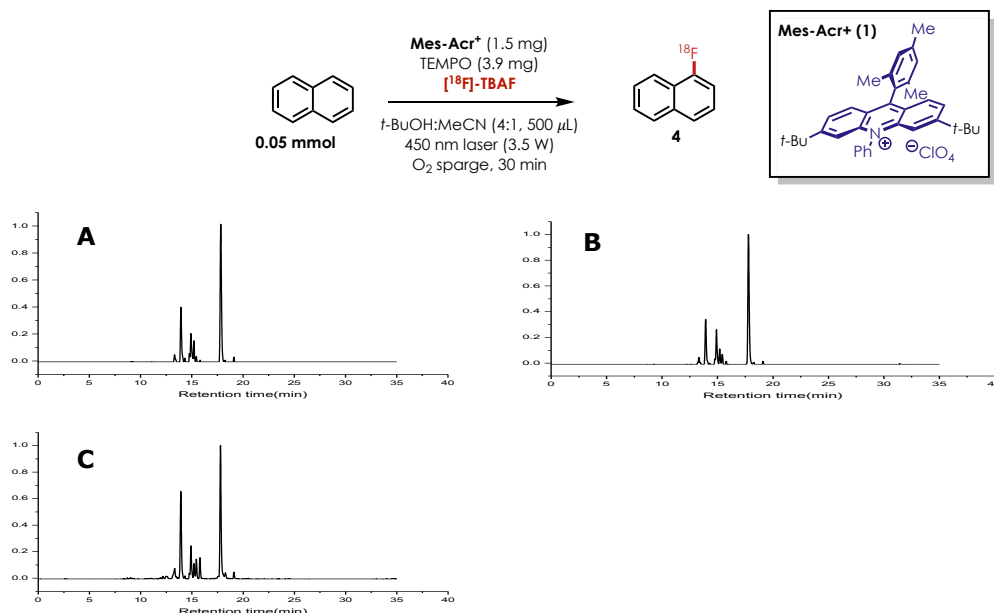

**Fig. S11.** Radio-HPLC traces of **4**

HPLC condition: Column: Phenomenex, Kinetex® 5µm EVO C18 100 Å, 250 x 4.6 mm LC Column. Solvent A: 0.1%TFA water; Solvent B: 0.1%TFA acetonitrile; Grad/isocrat: 0 to 2 min: isocratic elution at 5% solvent B, 2 to 22 min: 5% to 95% solvent B, 22 to 28 min: isocratic elution at 95% solvent B, 28 to 28.1 min: 95% to 5% solvent B, 28.1 to 30 min: isocratic elution at 5% solvent B. Flow rate: 1 mL/min, column temperature: 19 to 21 °C.

| Run number | RCY(Decay corrected) <b>4</b> |
|------------|-------------------------------|
| Run 1      | 20.3%                         |
| Run 2      | 20.1%                         |
| Run 3      | 22.2%                         |
| Average    | <b>20.9±1%</b>                |

**Table S16.** Average radiochemical yields for **4**

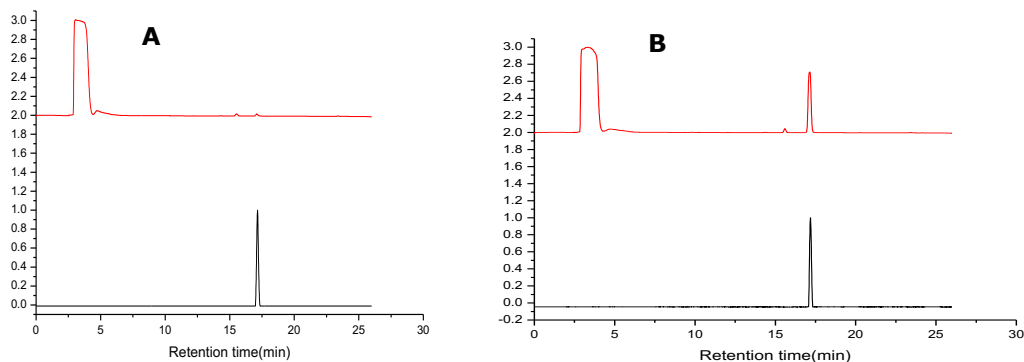

**Fig. S12.** HPLC traces of QC(**A**) and co-injection(**B**) for **4**

HPLC condition: Column: Phenomenex, Kinetex® 5µm F5 100 Å, 250 x 4.6 mm LC Column. Solvent A: 0.1%TFA water; Solvent B: 0.1%TFA acetonitrile;Grad/isocrat: 0 to 2 min: 20% to 45% solvent B, 2 to 22 min: 45% to 60% solvent B, 22 to 28 min: 60% to 95% solvent B, 28 to 28.1 min: 95% to 20% solvent B, 28.1 to 30 min: isocratic elution at 20% solvent B. Flow rate: 1 mL/min, column temperature: 19 to 21 °C.

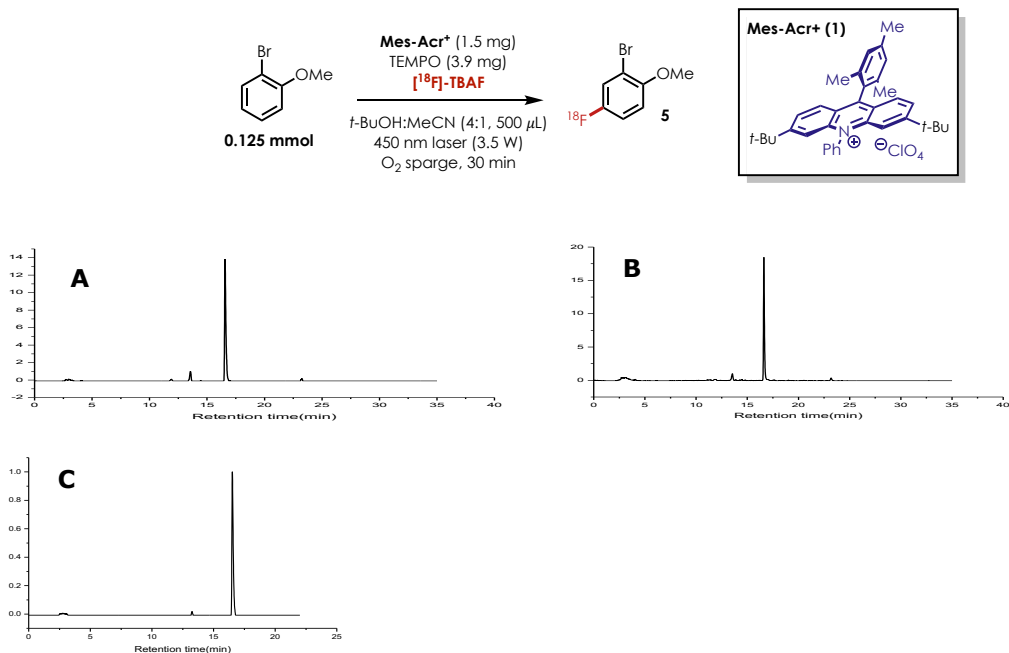

**Fig. S13.** Radio-HPLC traces of **5**

HPLC condition: Column: Phenomenex, Kinetex® 5µm EVO C18 100 Å, 250 x 4.6 mm LC Column. Solvent A: 0.1%TFA water; Solvent B: 0.1%TFA acetonitrile; Grad/isocrat: 0 to 2 min: isocratic elution at 5% solvent B, 2 to 22 min: 5% to 95% solvent B, 22 to 28 min: isocratic elution at 95% solvent B, 28 to 28.1 min: 95% to 5% solvent B, 28.1 to 30 min: isocratic elution at 5% solvent B. Flow rate: 1 mL/min, column temperature: 19 to 21 °C.

| Run number | RCY(Decay corrected) <b>5</b> |
|------------|-------------------------------|
| Run 1      | 8.9%                          |
| Run 2      | 9.7%                          |
| Run 3      | 9.0%                          |
| Average    | <b>9.2±0.5%</b>               |

**Table S17.** Average radiochemical yields for **5**

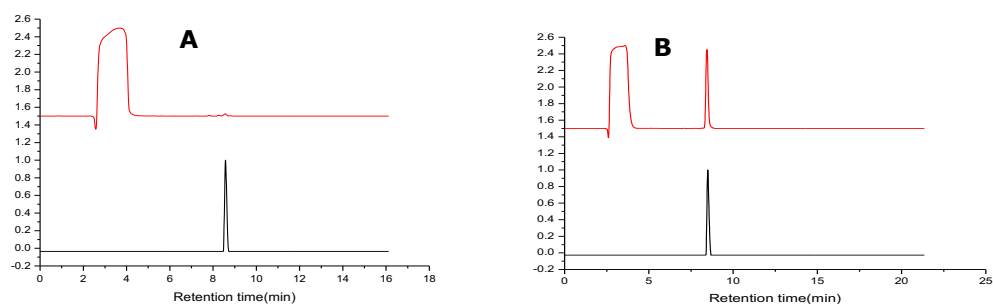

**Fig. S14.** HPLC traces of QC(A) and co-injection(B) for **5**

HPLC condition: Column: Phenomenex, Kinetex® 5µm F5 100 Å, 250 x 4.6 mm LC Column. Solvent A: 0.1%TFA water; Solvent B: 0.1%TFA acetonitrile; isocrat: 0 to 35 min: 55% solvent B. Flow rate: 1 mL/min, column temperature: 19 to 21 °C.

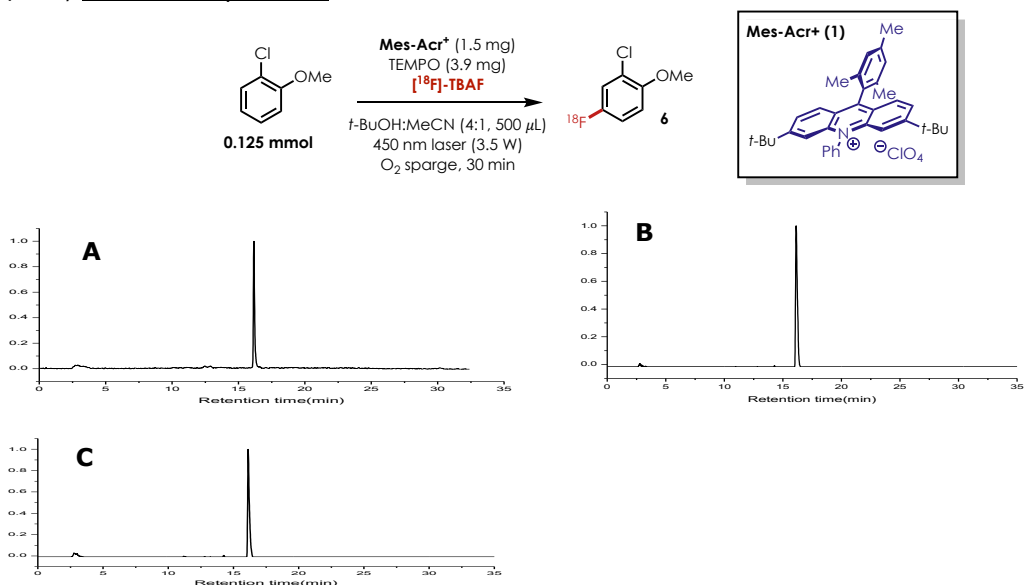

**Fig. S15.** Radio-HPLC traces of **6**

HPLC condition: Column: Phenomenex, Kinetex® 5µm EVO C18 100 Å, 250 x 4.6 mm LC Column. Solvent A: 0.1%TFA water; Solvent B: 0.1%TFA acetonitrile; Grad/isocrat: 0 to 2 min: isocratic elution at 5% solvent B, 2 to 22 min: 5% to 95% solvent B, 22 to 28 min: isocratic elution at 95% solvent B, 28 to 28.1 min: 95% to 5% solvent B, 28.1 to 30 min: isocratic elution at 5% solvent B. Flow rate: 1 mL/min, column temperature: 19 to 21 °C.

| Run number | RCY(Decay corrected) <b>6</b> |
|------------|-------------------------------|
| Run 1      | 16.0%                         |
| Run 2      | 15.4%                         |
| Run 3      | 13.8%                         |
| Average    | <b>15.1±1%</b>                |

**Table S18.** Average radiochemical yields for **6**

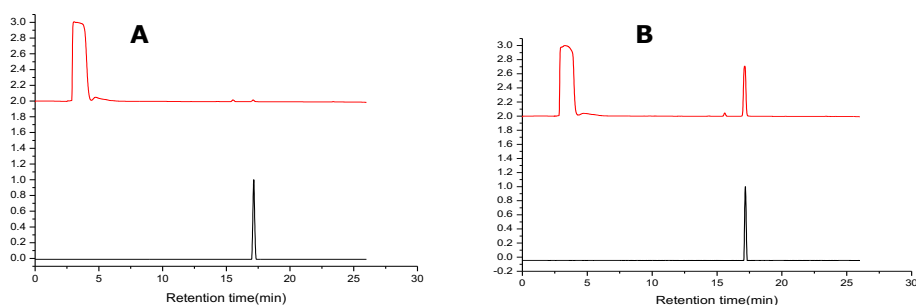

**Fig. S16.** HPLC traces of QC(A) and co-injection(B) for **6**

HPLC condition: Column: Phenomenex, Kinetex® 5µm F5 100 Å, 250 x 4.6 mm LC Column. Solvent A: 0.1%TFA water; Solvent B: 0.1%TFA acetonitrile; Grad/isocrat: 0 to 2 min: 20% to 45% solvent B, 2 to 22 min: 45% to 60% solvent B, 22 to 28 min: 60% to 95% solvent B, 28 to 28.1 min: 95% to 20% solvent B, 28.1 to 30 min: isocratic elution at 20% solvent B. Flow rate: 1 mL/min, column temperature: 19 to 21 °C.

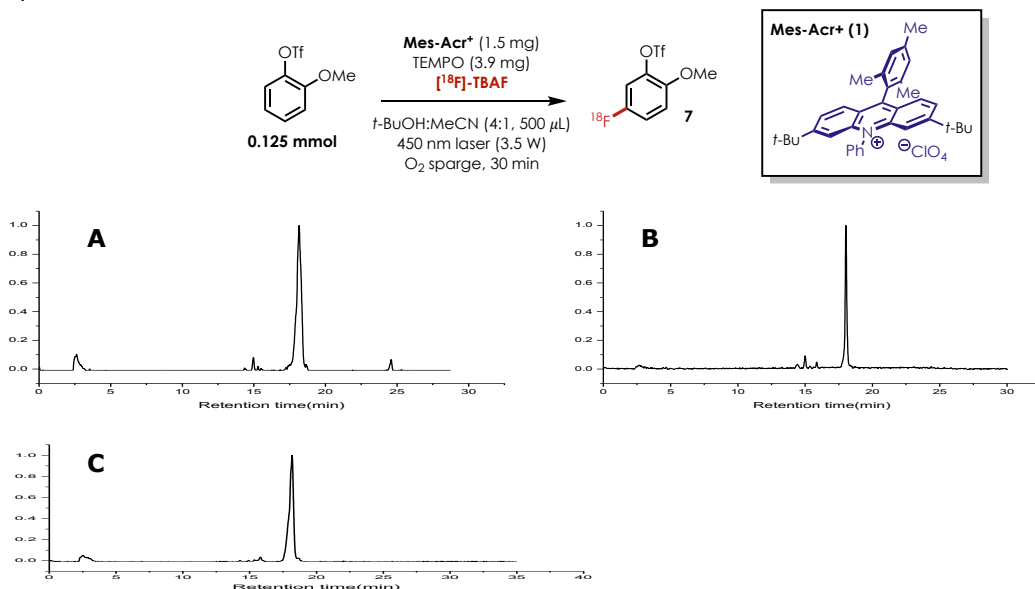

**Fig. S17.** Radio-HPLC traces of **7**

HPLC condition: Column: Phenomenex, Kinetex® 5µm EVO C18 100 Å, 250 x 4.6 mm LC Column. Solvent A: 0.1%TFA water; Solvent B: 0.1%TFA acetonitrile; Grad/isocrat: 0 to 2 min: isocratic elution at 5% solvent B, 2 to 22 min: 5% to 95% solvent B, 22 to 28 min: isocratic elution at 95% solvent B, 28 to 28.1 min: 95% to 5% solvent B, 28.1 to 30 min: isocratic elution at 5% solvent B. Flow rate: 1 mL/min, column temperature: 19 to 21 °C.

| Run number | RCY(Decay corrected) <b>7</b> |
|------------|-------------------------------|
| Run 1      | 32.5%                         |
| Run 2      | 23.1%                         |
| Run 3      | 27.4%                         |
| Average    | <b>27.7±5%</b>                |

**Table S19.** Average radiochemical yields for **7**

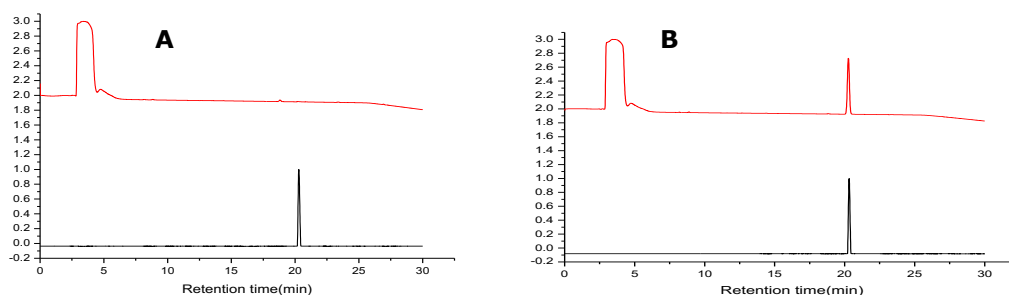

**Fig. S18.** HPLC traces of QC(A) and co-injection(B) for **7**

HPLC condition: Column: Phenomenex, Kinetex® 5µm F5 100 Å, 250 x 4.6 mm LC Column. Solvent A: 0.1%TFA water; Solvent B: 0.1%TFA acetonitrile; Grad/isocrat: 0 to 2 min: 20% to 45% solvent B, 2 to 22 min: 45% to 60% solvent B, 22 to 28 min: 60% to 95% solvent B, 28 to 28.1 min: 95% to 20% solvent B, 28.1 to 30 min: isocratic elution at 20% solvent B. Flow rate: 1 mL/min, column temperature: 19 to 21 °C.

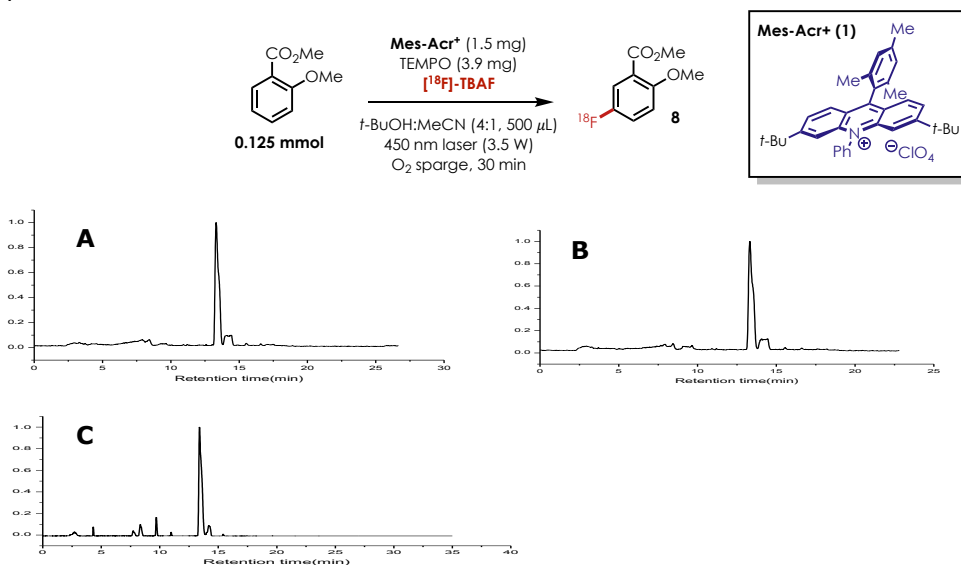

**Fig. S19.** Radio-HPLC traces of **8**

HPLC condition: Column: Phenomenex, Kinetex® 5µm EVO C18 100 Å, 250 x 4.6 mm LC Column. Solvent A: 0.1%TFA water; Solvent B: 0.1%TFA acetonitrile; Grad/isocrat: 0 to 2 min: isocratic elution at 5% solvent B, 2 to 22 min: 5% to 95% solvent B, 22 to 28 min: isocratic elution at 95% solvent B, 28 to 28.1 min: 95% to 5% solvent B, 28.1 to 30 min: isocratic elution at 5% solvent B. Flow rate: 1 mL/min, column temperature: 19 to 21 °C.

| Run number | RCY(Decay corrected) <b>8</b> |
|------------|-------------------------------|
| Run 1      | 21.4%                         |
| Run 2      | 29.1%                         |
| Run 3      | 19.9%                         |
| Average    | <b>23.5±5%</b>                |

**Table S20.** Average radiochemical yields for **8**

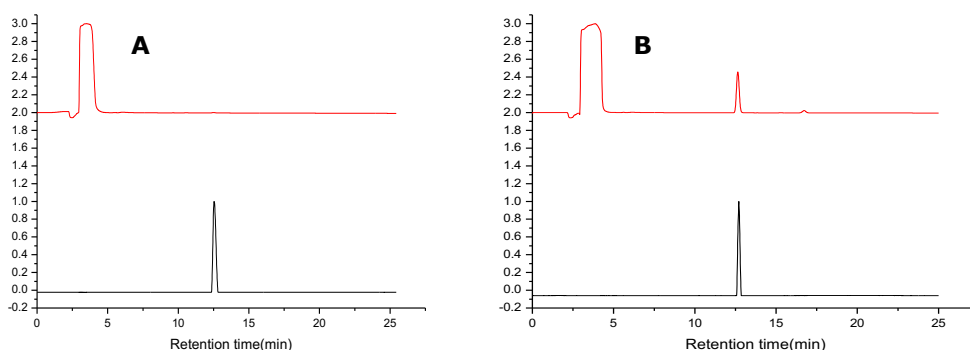

**Fig. S20.** HPLC traces of QC(A) and co-injection(B) for **8**

HPLC condition: Column: Phenomenex, Kinetex® 5µm F5 100 Å, 250 x 4.6 mm LC Column. Solvent A: 0.1%TFA water; Solvent B: 0.1%TFA acetonitrile; isocrat: 0 to 35 min: 35% solvent B. Flow rate: 1 mL/min, column temperature: 19 to 21 °C.

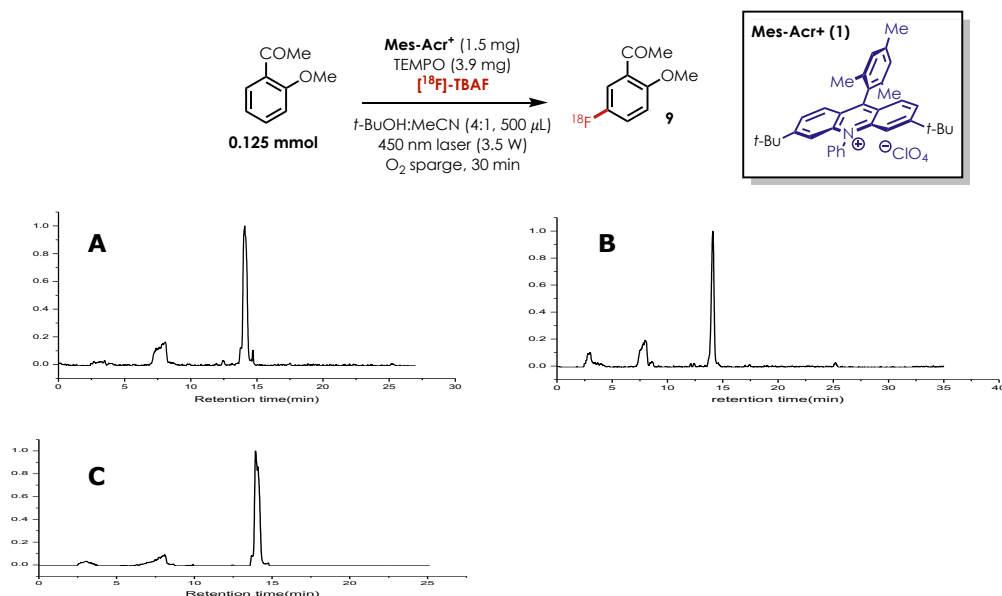

**Fig. S21.** Radio-HPLC traces of **9**

HPLC condition: Column: Phenomenex, Kinetex® 5µm EVO C18 100 Å, 250 x 4.6 mm LC Column. Solvent A: 0.1%TFA water; Solvent B: 0.1%TFA acetonitrile; Grad/isocrat: 0 to 2 min: isocratic elution at 5% solvent B, 2 to 22 min: 5% to 95% solvent B, 22 to 28 min: isocratic elution at 95% solvent B, 28 to 28.1 min: 95% to 5% solvent B, 28.1 to 30 min: isocratic elution at 5% solvent B. Flow rate: 1 mL/min, column temperature: 19 to 21 °C.

| Run number | RCY(Decay corrected) <b>9</b> |
|------------|-------------------------------|
| Run 1      | 25.3%                         |
| Run 2      | 22.7%                         |
| Run 3      | 25.9%                         |
| Average    | <b>24.6±2%</b>                |

**Table S21.** Average radiochemical yields for **9**

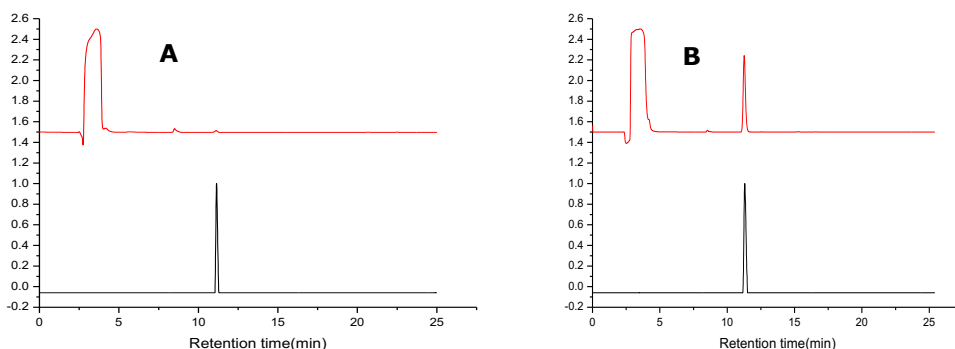

**Fig. S22.** HPLC traces of QC(**A**) and co-injection(**B**) for **9**

HPLC condition: Column: Phenomenex, Kinetex® 5µm F5 100 Å, 250 x 4.6 mm LC Column. Solvent A: 0.1%TFA water; Solvent B: 0.1%TFA acetonitrile; isocrat: 0 to 35 min: 40% solvent B. Flow rate: 1 mL/min, column temperature: 19 to 21 °C.

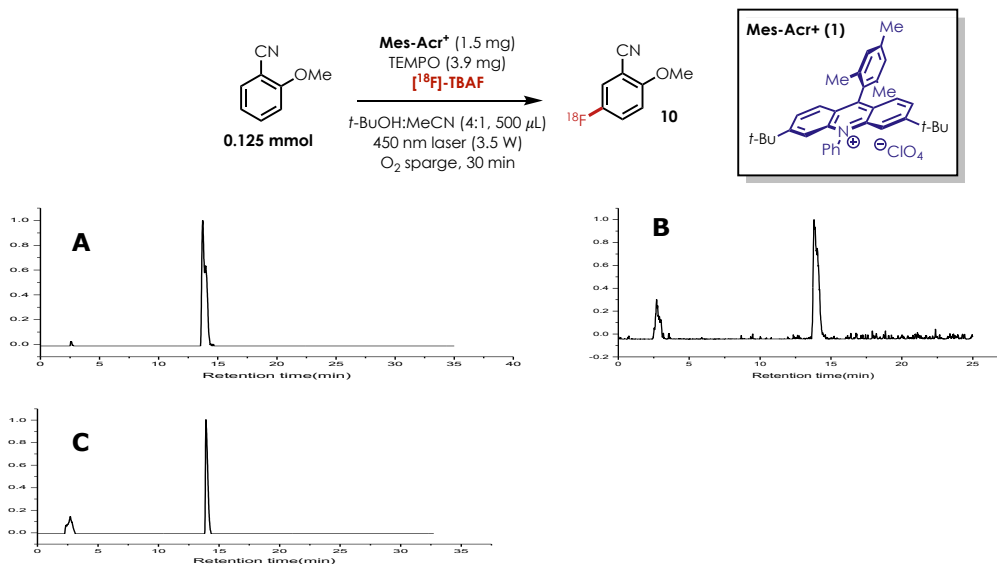

**Fig. S23.** Radio-HPLC traces of **10**

HPLC condition: Column: Phenomenex, Kinetex® 5µm EVO C18 100 Å, 250 x 4.6 mm LC Column. Solvent A: 0.1%TFA water; Solvent B: 0.1%TFA acetonitrile; Grad/isocrat: 0 to 2 min: isocratic elution at 5% solvent B, 2 to 22 min: 5% to 95% solvent B, 22 to 28 min: isocratic elution at 95% solvent B, 28 to 28.1 min: 95% to 5% solvent B, 28.1 to 30 min: isocratic elution at 5% solvent B. Flow rate: 1 mL/min, column temperature: 19 to 21 °C.

| Run number | RCY(Decay corrected) <b>10</b> |
|------------|--------------------------------|
| Run 1      | 12.9%                          |
| Run 2      | 8.9%                           |
| Run 3      | 11.5%                          |
| Average    | 11.1±2%                        |

**Table S22.** Average radiochemical yields for **10**

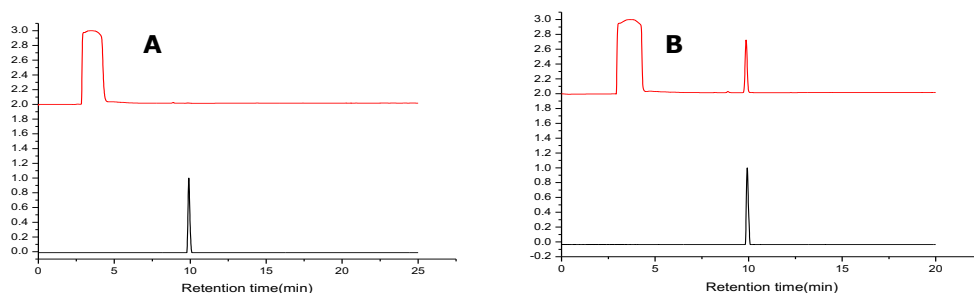

**Fig. S24.** HPLC traces of QC(A) and co-injection(B) for **10**

HPLC condition: Column: Phenomenex, Kinetex® 5µm F5 100 Å, 250 x 4.6 mm LC Column. Solvent A: 0.1%TFA water; Solvent B: 0.1%TFA acetonitrile; Grad/isocrat: 0 to 2 min: 20% to 45% solvent B, 2 to 22 min: 45% to 60% solvent B, 22 to 28 min: 60% to 95% solvent B, 28 to 28.1 min: 95% to 20% solvent B, 28.1 to 30 min: isocratic elution at 20% solvent B. Flow rate: 1 mL/min, column temperature: 19 to 21 °C

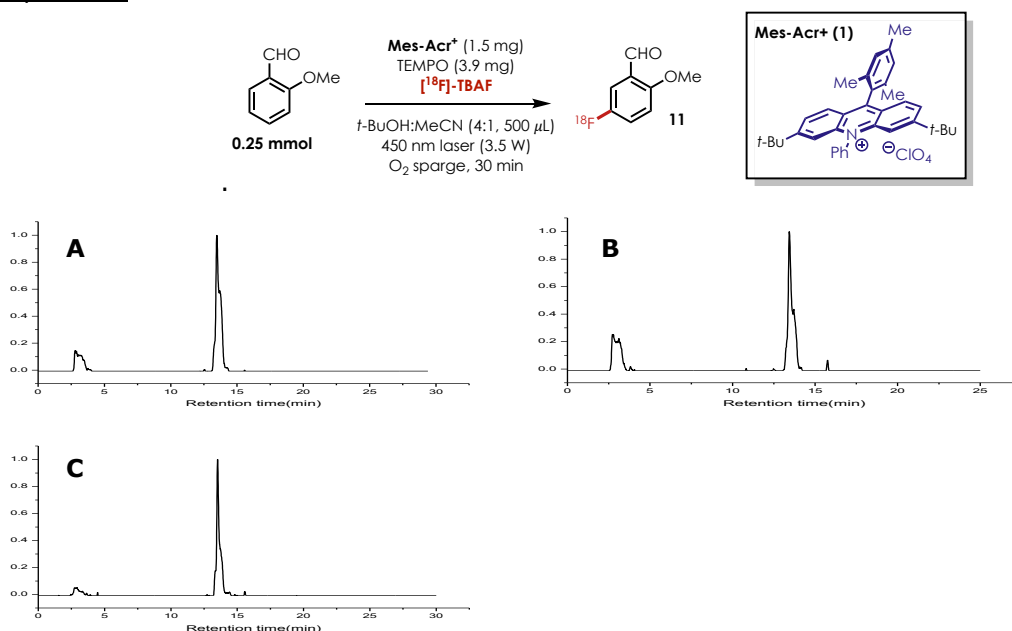

**Fig. S25.** Radio-HPLC traces of **11**

HPLC condition: Column: Phenomenex, Kinetex® 5µm EVO C18 100 Å, 250 x 4.6 mm LC Column. Solvent A: 0.1%TFA water; Solvent B: 0.1%TFA acetonitrile; Grad/isocrat: 0 to 2 min: isocratic elution at 5% solvent B, 2 to 22 min: 5% to 95% solvent B, 22 to 28 min: isocratic elution at 95% solvent B, 28 to 28.1 min: 95% to 5% solvent B, 28.1 to 30 min: isocratic elution at 5% solvent B. Flow rate: 1 mL/min, column temperature: 19 to 21 °C.

| Run number | RCY(Decay corrected) <b>11</b> |
|------------|--------------------------------|
| Run 1      | 27.7%                          |
| Run 2      | 21.3%                          |
| Run 3      | 21.5%                          |
| Average    | <b>23.5±4%</b>                 |

**Table S23.** Average radiochemical yields for **11**

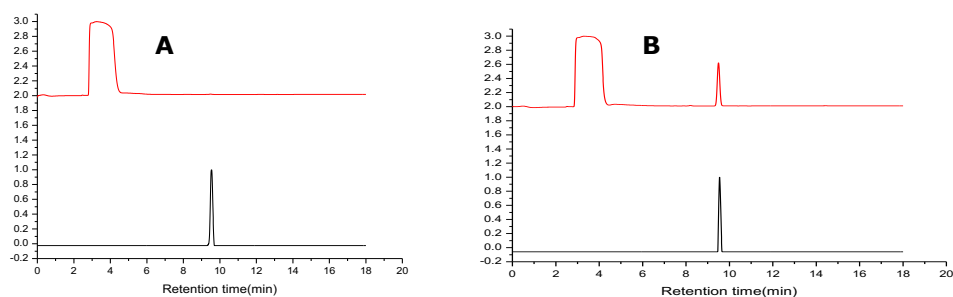

**Fig. S26.** HPLC traces of QC(**A**) and co-injection(**B**) for **11**

HPLC condition: Column: Phenomenex, Kinetex® 5µm F5 100 Å, 250 x 4.6 mm LC Column. Solvent A: 0.1%TFA water; Solvent B: 0.1%TFA acetonitrile; Grad/isocrat: 0 to 2 min: 20% to 45% solvent B, 2 to 22 min: 45% to 60% solvent B, 22 to 28 min: 60% to 95% solvent B, 28 to 28.1 min: 95% to 20% solvent B, 28.1 to 30 min: isocratic elution at 20% solvent B. Flow rate: 1 mL/min, column temperature: 19 to 21 °C.

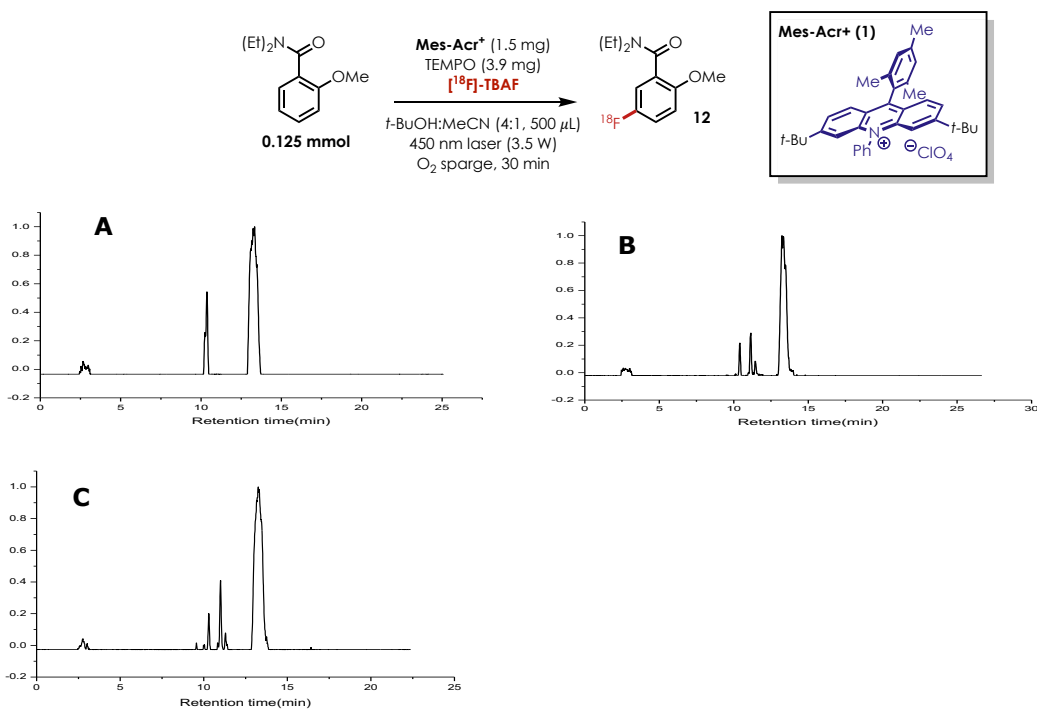

**Fig. S27.** Radio-HPLC traces of **12**

HPLC condition: Column: Phenomenex, Kinetex® 5 $\mu$ m EVO C18 100 Å, 250 x 4.6 mm LC Column. Solvent A: 0.1%TFA water; Solvent B: 0.1%TFA acetonitrile; Grad/isocrat: 0 to 2 min: isocratic elution at 5% solvent B, 2 to 22 min: 5% to 95% solvent B, 22 to 28 min: isocratic elution at 95% solvent B, 28 to 28.1 min: 95% to 5% solvent B, 28.1 to 30 min: isocratic elution at 5% solvent B. Flow rate: 1 mL/min, column temperature: 19 to 21 °C.

| Run number | RCY(Decay corrected) <b>12</b> |
|------------|--------------------------------|
| Run 1      | 13.4%                          |
| Run 2      | 13.2%                          |
| Run 3      | 14.8%                          |
| Average    | <b>13.8<math>\pm</math>1%</b>  |

**Table S24.** Average radiochemical yields for **12**

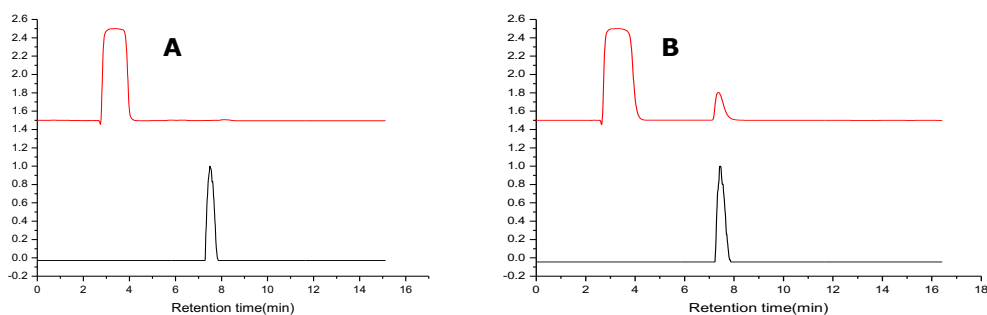

**Fig. S28.** HPLC traces of QC(A) and co-injection(B) for **12**

HPLC condition: Column: Phenomenex, Kinetex® 5µm F5 100 Å, 250 x 4.6 mm LC Column. Solvent A: 0.1%TFA water; Solvent B: 0.1%TFA acetonitrile; isocrat: 0 to 35 min: 40% solvent B. Flow rate: 1 mL/min, column temperature: 19 to 21 °C.

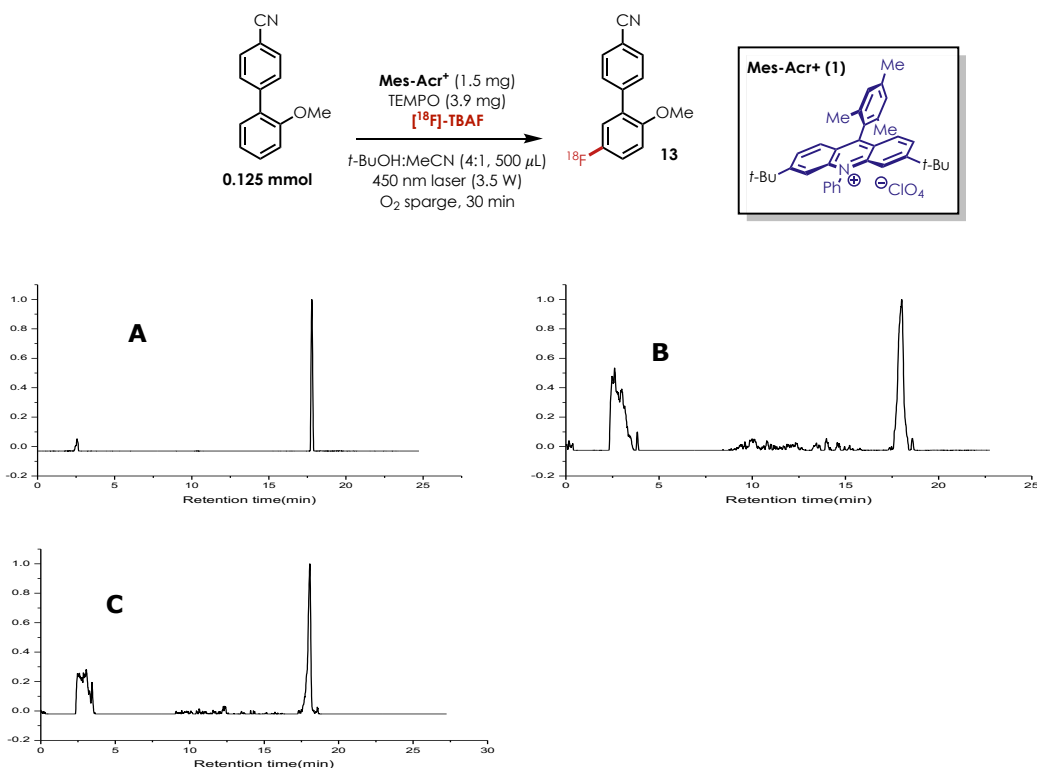

**Fig. S29.** Radio-HPLC traces of **13**

HPLC condition: Column: Phenomenex, Kinetex® 5µm EVO C18 100 Å, 250 x 4.6 mm LC Column. Solvent A: 0.1%TFA water; Solvent B: 0.1%TFA acetonitrile; Grad/isocrat: 0 to 2 min: isocratic elution at 5% solvent B, 2 to 22 min: 5% to 95% solvent B, 22 to 28 min: isocratic elution at 95% solvent B, 28 to 28.1 min: 95% to 5% solvent B, 28.1 to 30 min: isocratic elution at 5% solvent B. Flow rate: 1 mL/min, column temperature: 19 to 21 °C.

| Run number | RCY(Decay corrected) <b>13</b> |
|------------|--------------------------------|
| Run 1      | 4.2%                           |
| Run 2      | 4.7%                           |
| Run 3      | 3.3%                           |
| Average    | <b>4.1±0.6%</b>                |

**Table S25.** Average radiochemical yields for **13**

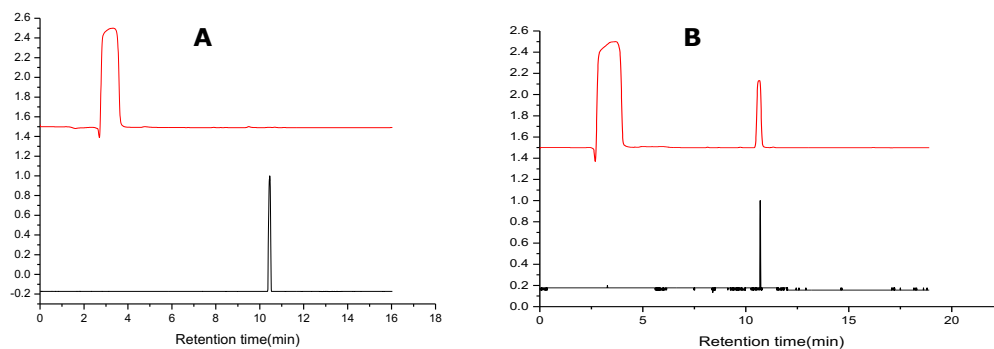

**Fig. S30.** HPLC traces of QC(A) and co-injection(B) for **13**

HPLC condition: Column: Phenomenex, Kinetex® 5µm F5 100 Å, 250 x 4.6 mm LC Column. Solvent A: 0.1%TFA water; Solvent B: 0.1%TFA acetonitrile; isocrat: 0 to 35 min: 55% solvent B. Flow rate: 1 mL/min, column temperature: 19 to 21 °C.

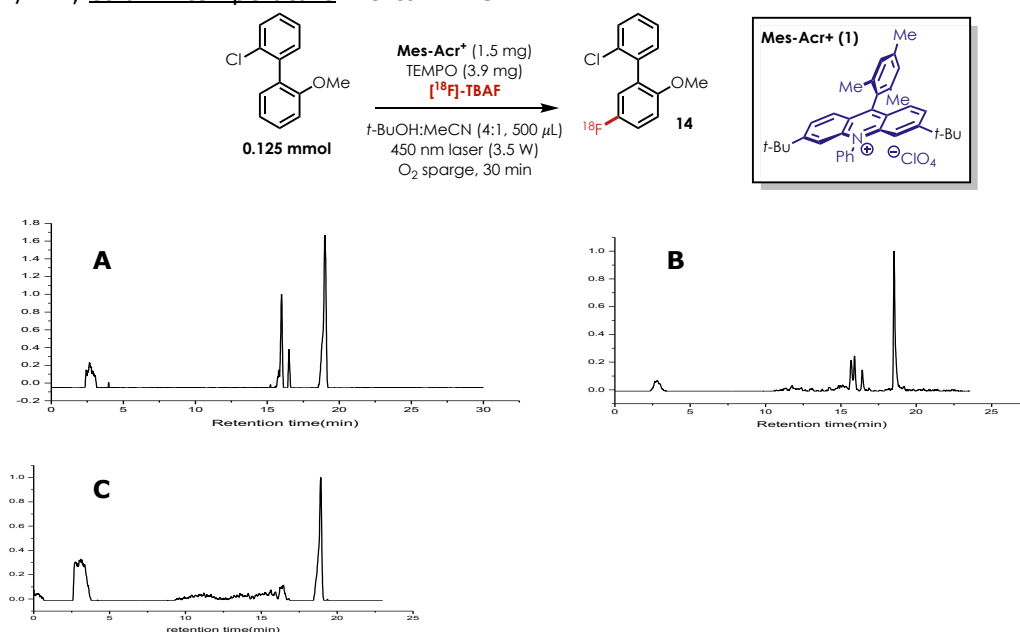

**Fig. S31.** Radio-HPLC traces of **14**

HPLC condition: Column: Phenomenex, Kinetex® 5µm EVO C18 100 Å, 250 x 4.6 mm LC Column. Solvent A: 0.1%TFA water; Solvent B: 0.1%TFA acetonitrile; Grad/isocrat: 0 to 2 min: isocratic elution at 5% solvent B, 2 to 22 min: 5% to 95% solvent B, 22 to 28 min: isocratic elution at 95% solvent B, 28 to 28.1 min: 95% to 5% solvent B, 28.1 to 30 min: isocratic elution at 5% solvent B. Flow rate: 1 mL/min, column temperature: 19 to 21 °C.

| Run number | RCY(Decay corrected) <b>14</b> |
|------------|--------------------------------|
| Run 1      | 4.7%                           |
| Run 2      | 6.6%                           |
| Run 3      | 9.8%                           |
| Average    | <b>7.0±3%</b>                  |

**Table S26.** Average radiochemical yields for **14**

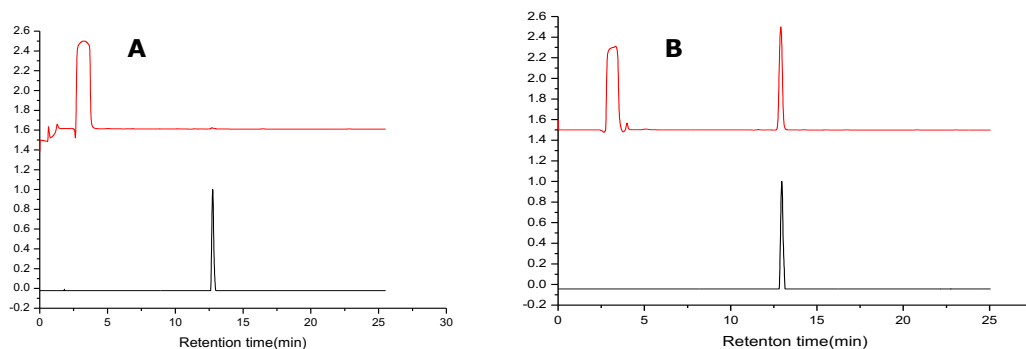

**Fig. S32.** HPLC traces of QC(A) and co-injection(B) for **14**

HPLC condition: Column: Phenomenex, Kinetex® 5µm F5 100 Å, 250 x 4.6 mm LC Column. Solvent A: 0.1%TFA water; Solvent B: 0.1%TFA acetonitrile; isocrat: 0 to 35 min: 55% solvent B. Flow rate: 1 mL/min, column temperature: 19 to 21 °C.

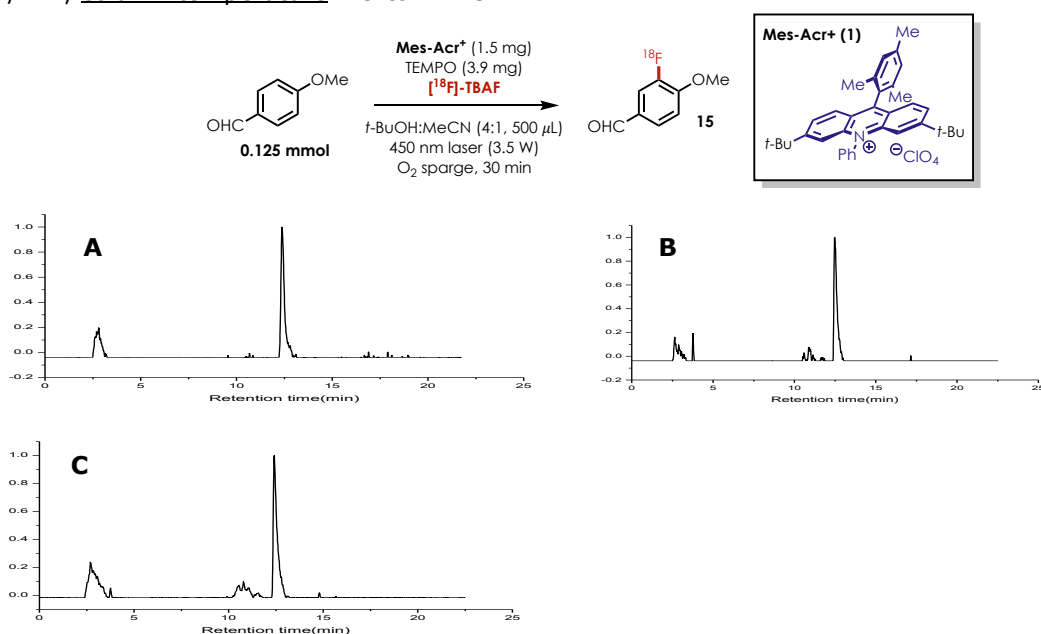

**Fig. S33.** Radio-HPLC traces of **15**

HPLC condition: Column: Phenomenex, Kinetex® 5µm EVO C18 100 Å, 250 x 4.6 mm LC Column. Solvent A: 0.1%TFA water; Solvent B: 0.1%TFA acetonitrile; Grad/isocrat: 0 to 2 min: isocratic elution at 5% solvent B, 2 to 22 min: 5% to 95% solvent B, 22 to 28 min: isocratic elution at 95% solvent B, 28 to 28.1 min: 95% to 5% solvent B, 28.1 to 30 min: isocratic elution at 5% solvent B. Flow rate: 1 mL/min, column temperature: 19 to 21 °C.

| Run number | RCY(Decay corrected) <b>15</b> |
|------------|--------------------------------|
| Run 1      | 4.3%                           |
| Run 2      | 5.2%                           |
| Run 3      | 7.5%                           |
| Average    | <b>5.7±1%</b>                  |

**Table S27.** Average radiochemical yields for **15**

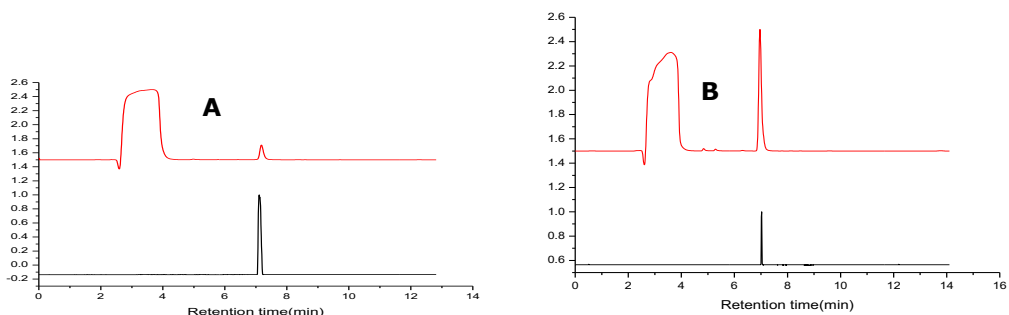

**Fig. S34.** HPLC traces of QC(A) and co-injection(B) for **15**

HPLC condition: Column: Phenomenex, Kinetex® 5µm F5 100 Å, 250 x 4.6 mm LC Column. Solvent A: 0.1%TFA water; Solvent B: 0.1%TFA acetonitrile; isocrat: 0 to 35 min: 45% solvent B. Flow rate: 1 mL/min, column temperature: 19 to 21 °C.

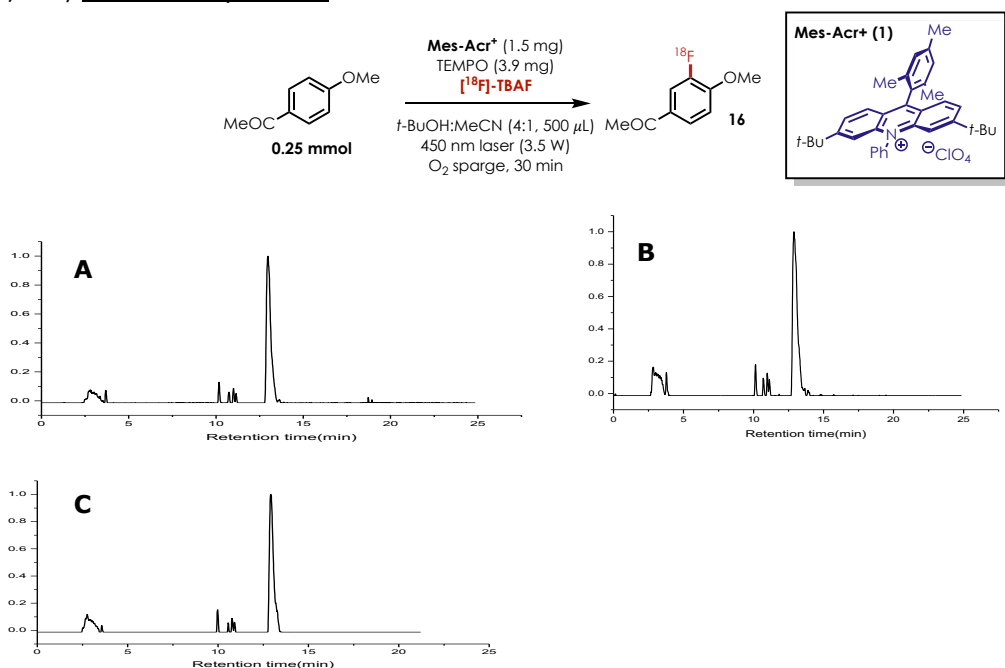

**Fig. S35.** Radio-HPLC traces of **16**

HPLC condition: Column: Phenomenex, Kinetex® 5µm EVO C18 100 Å, 250 x 4.6 mm LC Column. Solvent A: 0.1%TFA water; Solvent B: 0.1%TFA acetonitrile; Grad/isocrat: 0 to 2 min: isocratic elution at 5% solvent B, 2 to 22 min: 5% to 95% solvent B, 22 to 28 min: isocratic elution at 95% solvent B, 28 to 28.1 min: 95% to 5% solvent B, 28.1 to 30 min: isocratic elution at 5% solvent B. Flow rate: 1 mL/min, column temperature: 19 to 21 °C.

| Run number | RCY(Decay corrected) <b>16</b> |
|------------|--------------------------------|
| Run 1      | 10.2%                          |
| Run 2      | 12.2%                          |
| Run 3      | 9.2%                           |
| Average    | <b>10.5±1%</b>                 |

**Table S28.** Average radiochemical yields for **16**

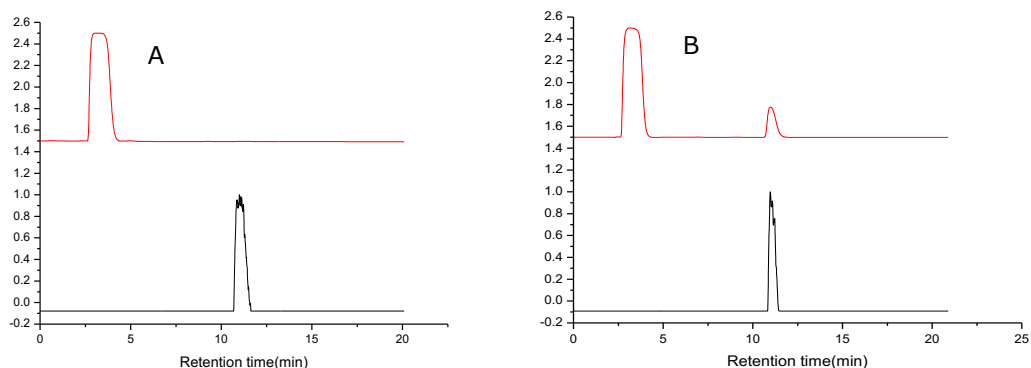

**Fig. S36.** HPLC traces of QC(A) and co-injection(B) for **16**

HPLC condition: Column: Phenomenex, Kinetex® 5µm F5 100 Å, 250 x 4.6 mm LC Column. Solvent A: 0.1%TFA water; Solvent B: 0.1%TFA acetonitrile; isocrat: 0 to 35 min: 35% solvent B. Flow rate: 1 mL/min, column temperature: 19 to 21 °C.

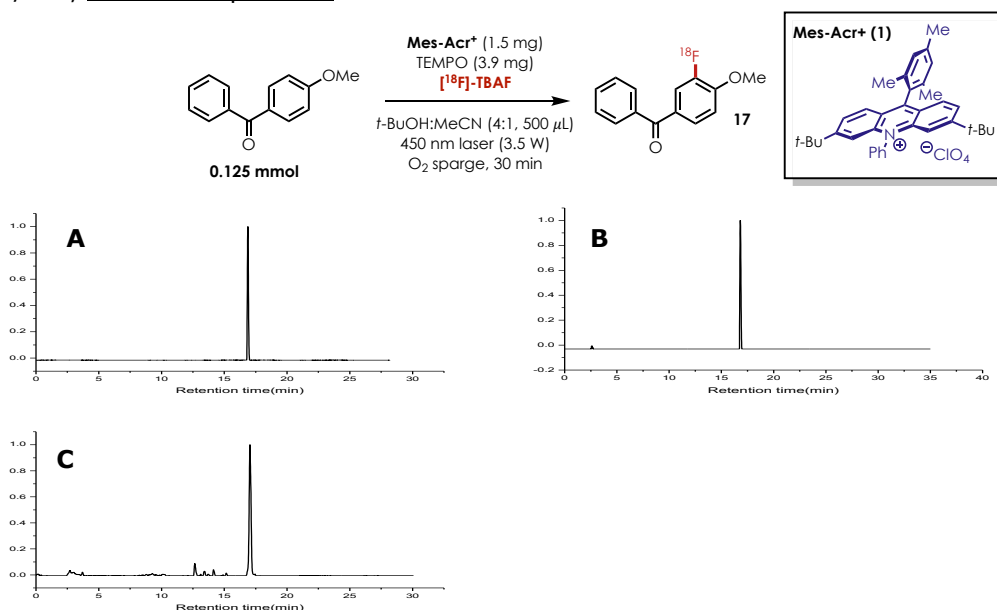

**Fig. S37.** Radio-HPLC traces of **17**

HPLC condition: Column: Phenomenex, Kinetex® 5µm EVO C18 100 Å, 250 x 4.6 mm LC Column. Solvent A: 0.1%TFA water; Solvent B: 0.1%TFA acetonitrile; Grad/isocrat: 0 to 2 min: isocratic elution at 5% solvent B, 2 to 22 min: 5% to 95% solvent B, 22 to 28 min: isocratic elution at 95% solvent B, 28 to 28.1 min: 95% to 5% solvent B, 28.1 to 30 min: isocratic elution at 5% solvent B. Flow rate: 1 mL/min, column temperature: 19 to 21 °C.

| Run number | RCY(Decay corrected) <b>17</b> |
|------------|--------------------------------|
| Run 1      | 7.0%                           |
| Run 2      | 6.1%                           |
| Run 3      | 6.8%                           |
| Average    | <b>6.6±0.5%</b>                |

**Table S29.** Average radiochemical yields for **17**

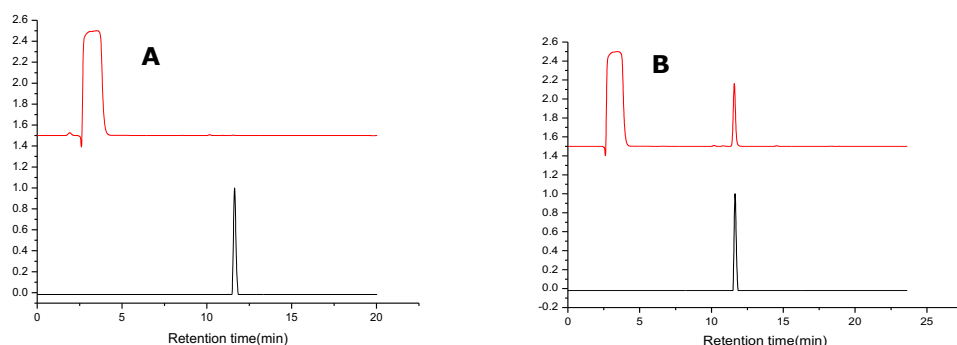

**Fig. S38.** HPLC traces of QC(A) and co-injection(B) for **17**

HPLC condition: Column: Phenomenex, Kinetex® 5µm F5 100 Å, 250 x 4.6 mm LC Column. Solvent A: 0.1%TFA water; Solvent B: 0.1%TFA acetonitrile; isocrat: 0 to 35 min: 50% solvent B. Flow rate: 1 mL/min, column temperature: 19 to 21 °C.

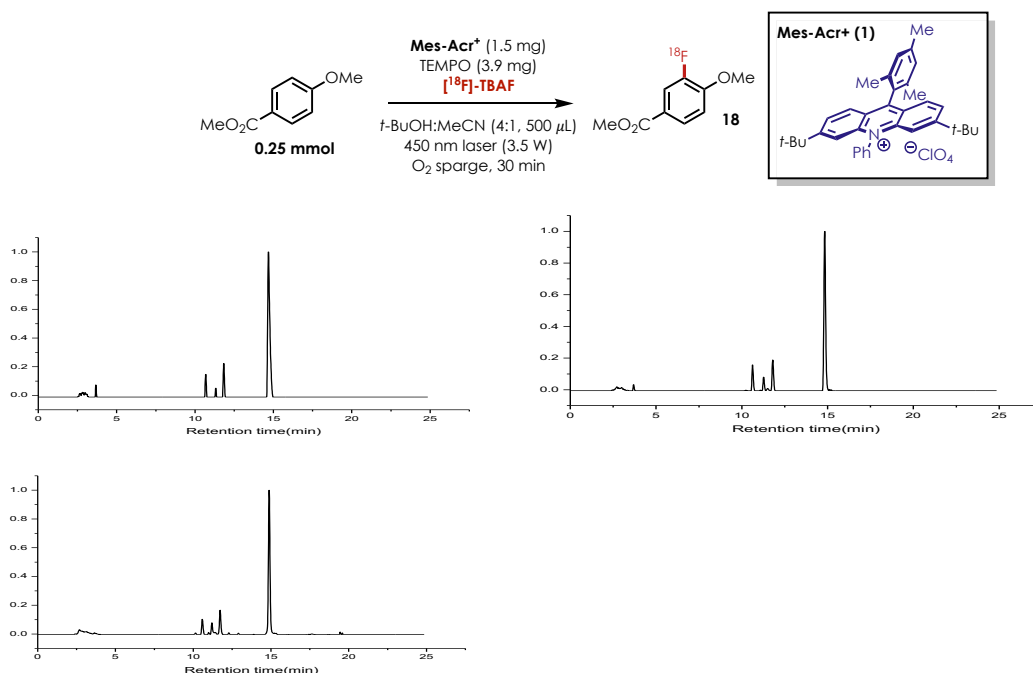

**Fig. S39.** Radio-HPLC traces of **18**

HPLC condition: Column: Phenomenex, Kinetex® 5µm EVO C18 100 Å, 250 x 4.6 mm LC Column. Solvent A: 0.1%TFA water; Solvent B: 0.1%TFA acetonitrile; Grad/isocrat: 0 to 2 min: isocratic elution at 5% solvent B, 2 to 22 min: 5% to 95% solvent B, 22 to 28 min: isocratic elution at 95% solvent B, 28 to 28.1 min: 95% to 5% solvent B, 28.1 to 30 min: isocratic elution at 5% solvent B. Flow rate: 1 mL/min, column temperature: 19 to 21 °C.

| Run number | RCY(Decay corrected) <b>18</b> |
|------------|--------------------------------|
| Run 1      | 8.2%                           |
| Run 2      | 12.1%                          |
| Run 3      | 4.7%                           |
| Average    | <b>8.3±4%</b>                  |

**Table S30.** Average radiochemical yields for **18**

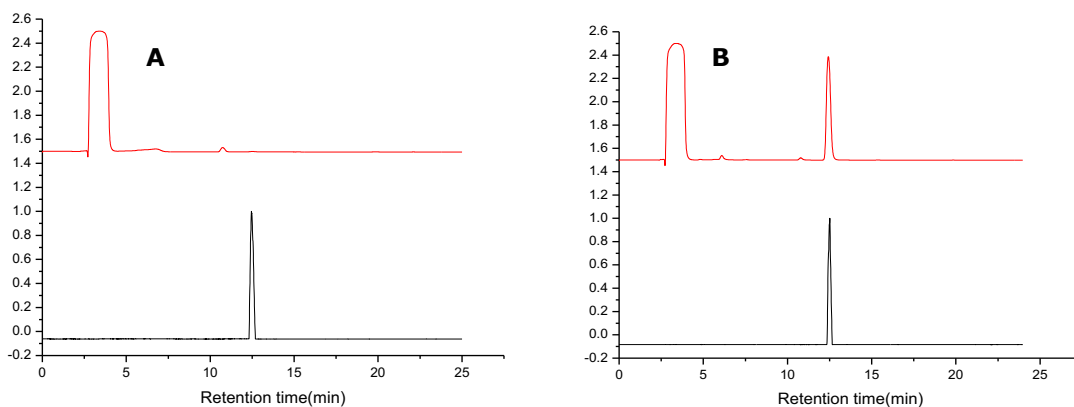

**Fig. S40.** HPLC traces of QC(A) and co-injection(B) for **18**

HPLC condition: Column: Phenomenex, Kinetex® 5µm F5 100 Å, 250 x 4.6 mm LC Column. Solvent A: 0.1%TFA water; Solvent B: 0.1%TFA acetonitrile; isocrat: 0 to 35 min: 40% solvent B. Flow rate: 1 mL/min, column temperature: 19 to 21 °C.

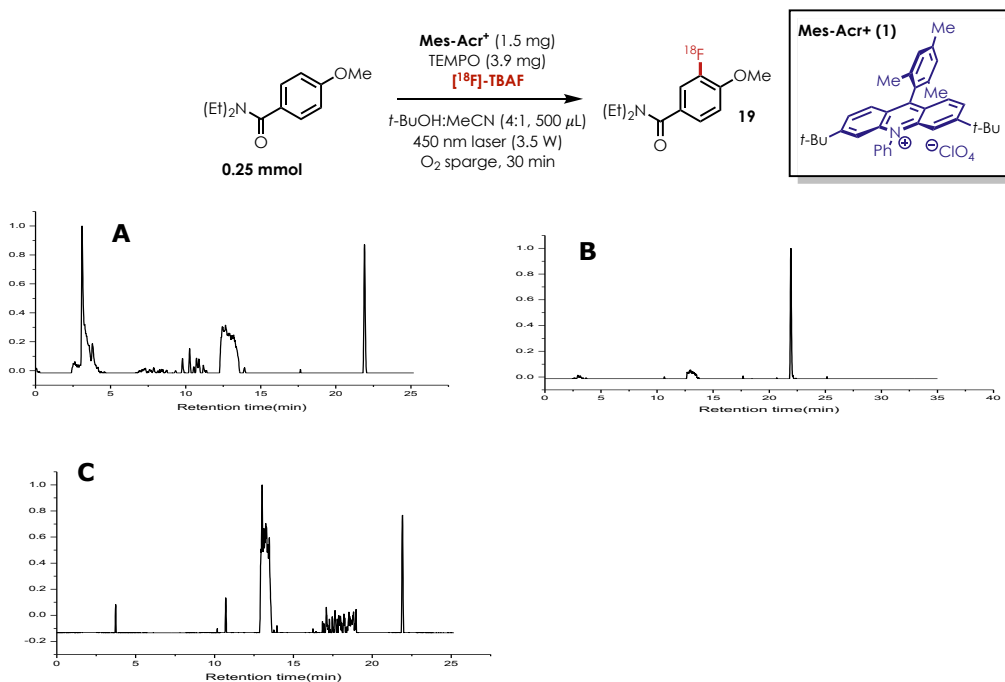

**Fig. S41.** Radio-HPLC traces of **19**

HPLC condition: Column: Phenomenex, Kinetex® 5µm EVO C18 100 Å, 250 x 4.6 mm LC Column. Solvent A: 0.1%TFA water; Solvent B: 0.1%TFA acetonitrile; Grad/isocrat: 0 to 2 min: isocratic elution at 5% solvent B, 2 to 22 min: 5% to 95% solvent B, 22 to 28 min: isocratic elution at 95% solvent B, 28 to 28.1 min: 95% to 5% solvent B, 28.1 to 30 min: isocratic elution at 5% solvent B. Flow rate: 1 mL/min, column temperature: 19 to 21 °C.

| Run number | RCY(Decay corrected) <b>19</b> |
|------------|--------------------------------|
| Run 1      | 4.8%                           |
| Run 2      | 3.2%                           |
| Run 3      | 3.6%                           |
| Average    | <b>3.9±0.9%</b>                |

**Table S31.** Average radiochemical yields for **19**

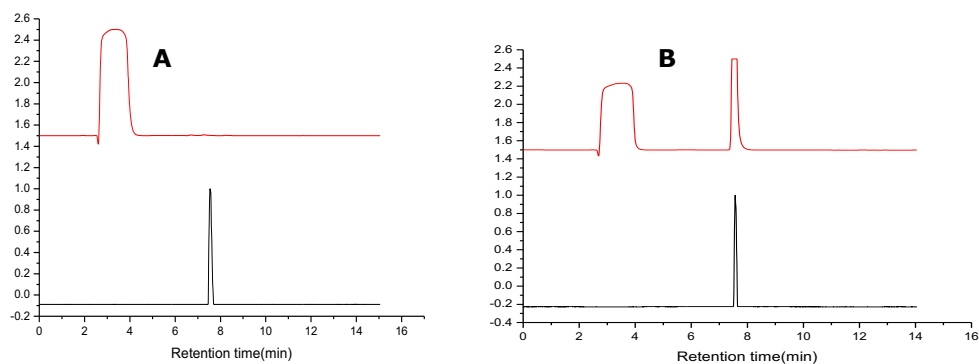

**Fig. S42.** HPLC traces of QC(**A**) and co-injection(**B**) for **19**

HPLC condition: Column: Phenomenex, Kinetex® 5µm F5 100 Å, 250 x 4.6 mm LC Column. Solvent A: 0.1%TFA water; Solvent B: 0.1%TFA acetonitrile; isocrat: 0 to 35 min: 40% solvent B. Flow rate: 1 mL/min, column temperature: 19 to 21 °C.

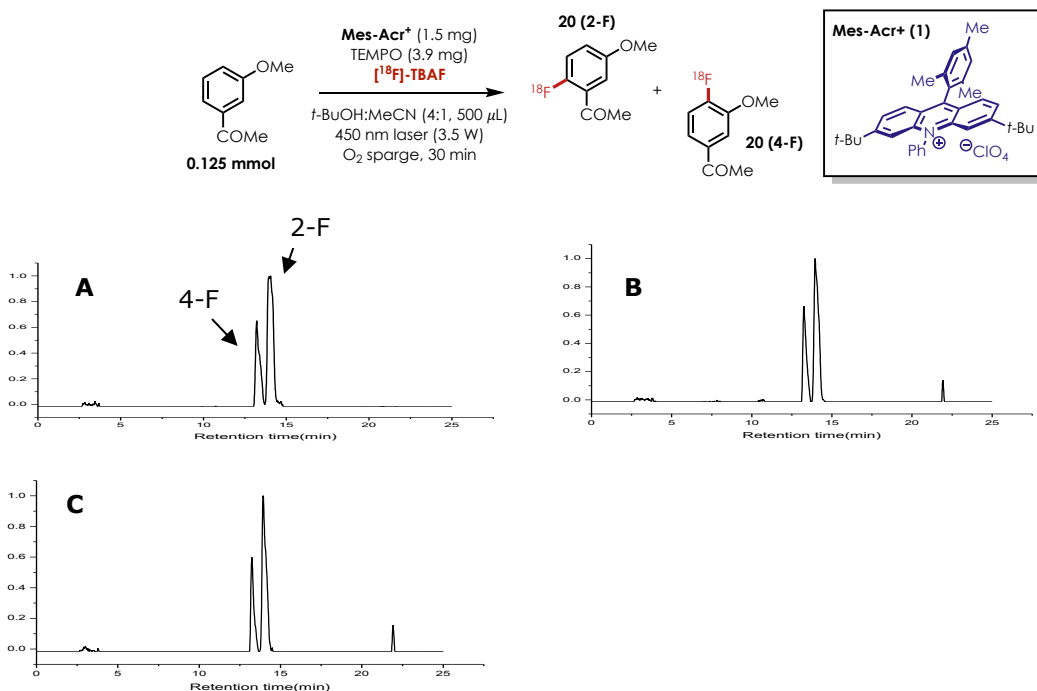

**Fig. S43.** Radio-HPLC traces of **20**

HPLC condition: Column: Phenomenex, Kinetex® 5μm EVO C18 100 Å, 250 x 4.6 mm LC Column. Solvent A: 0.1%TFA water; Solvent B: 0.1%TFA acetonitrile; Grad/isocrat: 0 to 2 min: isocratic elution at 5% solvent B, 2 to 22 min: 5% to 95% solvent B, 22 to 28 min: isocratic elution at 95% solvent B, 28 to 28.1 min: 95% to 5% solvent B, 28.1 to 30 min: isocratic elution at 5% solvent B. Flow rate: 1 mL/min, column temperature: 19 to 21 °C.

| Run number | RCY(Decay corrected) <b>20(2-F)</b> | RCY(Decay corrected) <b>20(4-F)</b> |
|------------|-------------------------------------|-------------------------------------|
| Run 1      | 15.4%                               | 8.7%                                |
| Run 2      | 14.5%                               | 7.3%                                |
| Run 3      | 14.6%                               | 7.4%                                |
| Average    | <b>14.8±0.6%</b>                    | <b>7.8±0.9%</b>                     |

**Table S32.** Average radiochemical yields for **20(2-F)** and **20(4-F)**

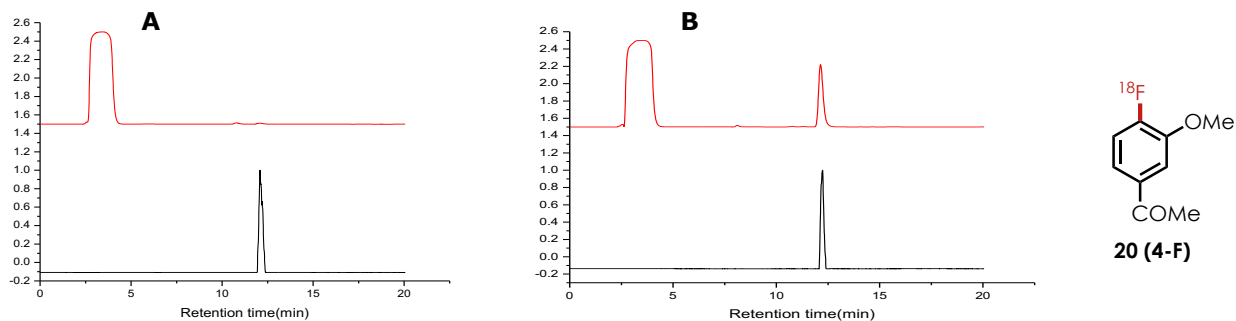

**Fig. S44.** HPLC traces of QC(A) and co-injection(B) for **20(4-F)**

HPLC condition: Column: Phenomenex, Kinetex® 5µm F5 100 Å, 250 x 4.6 mm LC Column. Solvent A: 0.1%TFA water; Solvent B: 0.1%TFA acetonitrile; isocrat: 0 to 35 min: **55%** solvent B. Flow rate: 1 mL/min, column temperature: 19 to 21 °C.

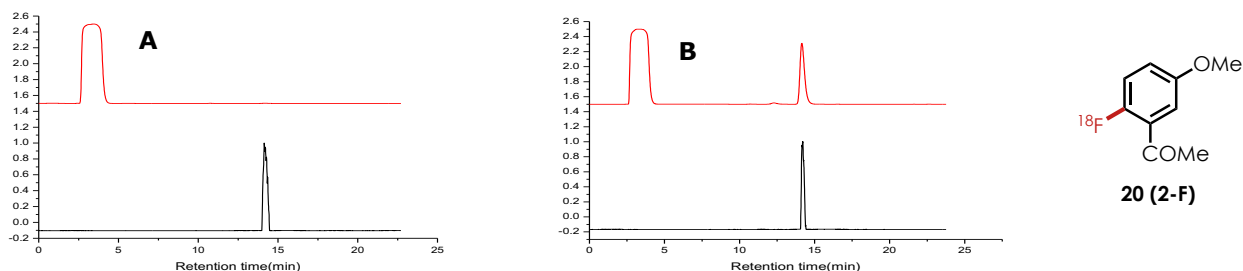

**Fig. S45.** HPLC traces of QC(A) and co-injection(B) for **20(2-F)**

HPLC condition: Column: Phenomenex, Kinetex® 5µm F5 100 Å, 250 x 4.6 mm LC Column. Solvent A: 0.1%TFA water; Solvent B: 0.1%TFA acetonitrile; isocrat: 0 to 35 min: **35%** solvent B. Flow rate: 1 mL/min, column temperature: 19 to 21 °C.

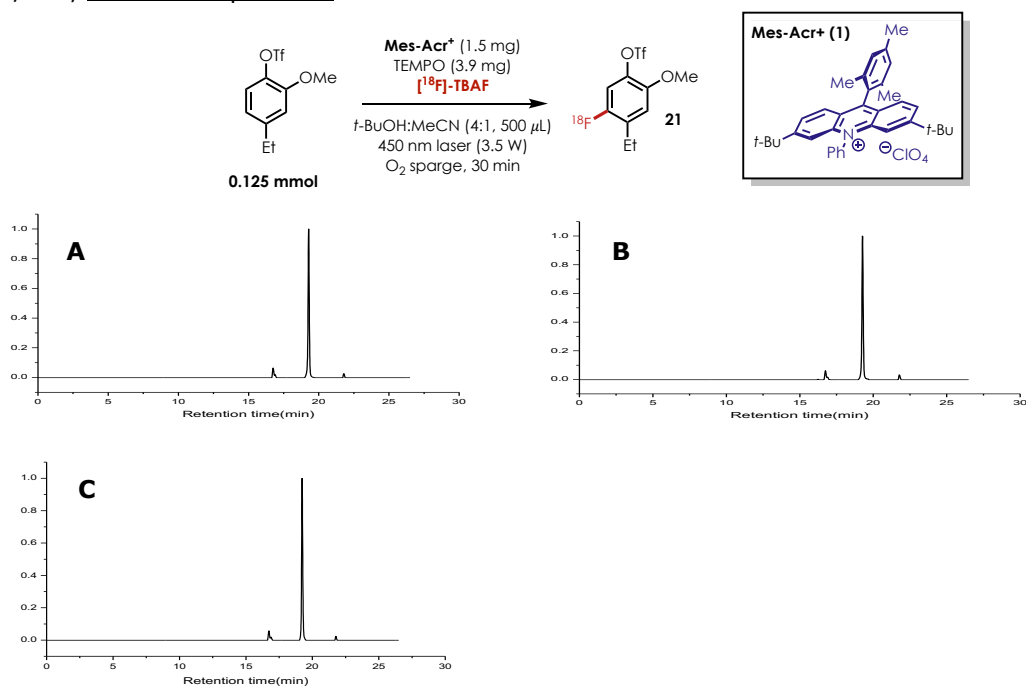

**Fig. S46.** Radio-HPLC traces of **21**

HPLC condition: Column: Phenomenex, Kinetex® 5µm EVO C18 100 Å, 250 x 4.6 mm LC Column. Solvent A: 0.1%TFA water; Solvent B: 0.1%TFA acetonitrile; Grad/isocrat: 0 to 2 min: isocratic elution at 5% solvent B, 2 to 22 min: 5% to 95% solvent B, 22 to 28 min: isocratic elution at 95% solvent B, 28 to 28.1 min: 95% to 5% solvent B, 28.1 to 30 min: isocratic elution at 5% solvent B. Flow rate: 1 mL/min, column temperature: 19 to 21 °C.

| Run number | RCY(Decay corrected) <b>21</b> |
|------------|--------------------------------|
| Run 1      | 33.5%                          |
| Run 2      | 32.0%                          |
| Run 3      | 37.5%                          |
| Average    | <b>34.3±3%</b>                 |

**Table S33.** Average radiochemical yields for **21**

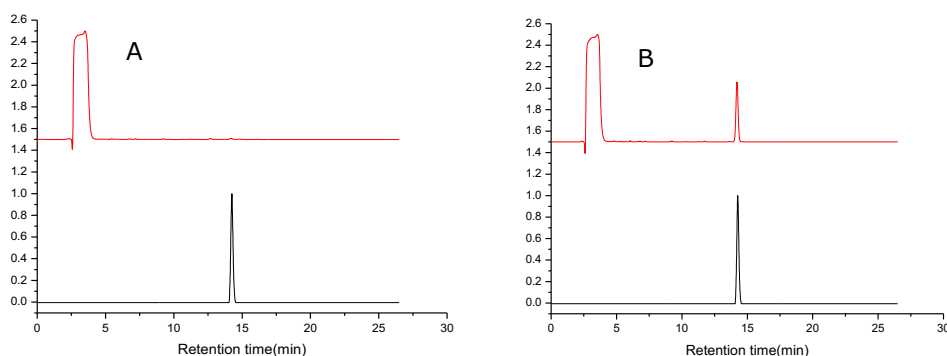

**Fig. S47.** HPLC traces of QC(A) and co-injection(B) for **21**

HPLC condition: Column: Phenomenex, Kinetex® 5µm F5 100 Å, 250 x 4.6 mm LC Column. Solvent A: 0.1%TFA water; Solvent B: 0.1%TFA acetonitrile; isocrat: 0 to 35 min:60% solvent B. Flow rate: 1 mL/min, column temperature: 19 to 21 °C.

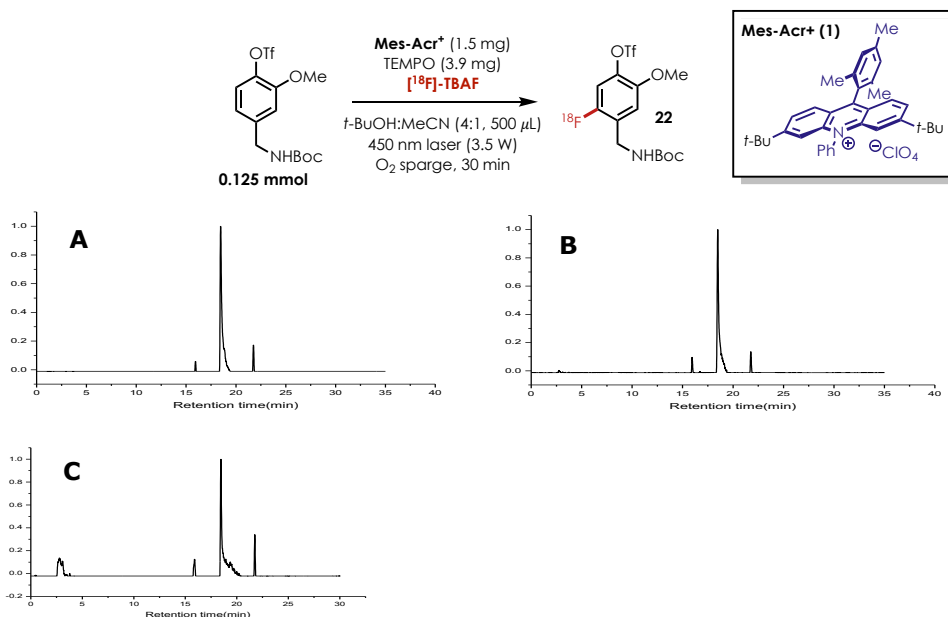

**Fig. S48.** Radio-HPLC traces of **22**

HPLC condition: Column: Phenomenex, Kinetex® 5µm EVO C18 100 Å, 250 x 4.6 mm LC Column. Solvent A: 0.1%TFA water; Solvent B: 0.1%TFA acetonitrile; Grad/isocrat: 0 to 2 min: isocratic elution at 5% solvent B, 2 to 22 min: 5% to 95% solvent B, 22 to 28 min: isocratic elution at 95% solvent B, 28 to 28.1 min: 95% to 5% solvent B, 28.1 to 30 min: isocratic elution at 5% solvent B. Flow rate: 1 mL/min, column temperature: 19 to 21 °C.

| Run number | RCY(Decay corrected) <b>22</b> |
|------------|--------------------------------|
| Run 1      | 11.6%                          |
| Run 2      | 16.5%                          |
| Run 3      | 10.9%                          |
| Average    | <b>13±3%</b>                   |

**Table S34.** Average radiochemical yields for **22**

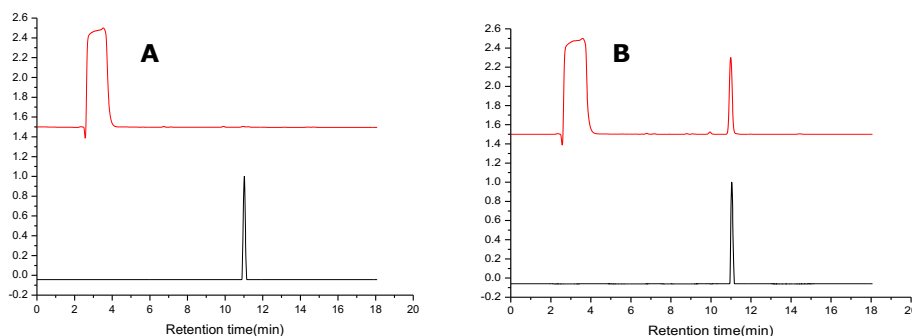

**Fig. S49.** HPLC traces of QC(A) and co-injection(B) for **22**

HPLC condition: Column: Phenomenex, Kinetex® 5µm F5 100 Å, 250 x 4.6 mm LC Column. Solvent A: 0.1%TFA water; Solvent B: 0.1%TFA acetonitrile; isocrat: 0 to 35 min: 60% solvent B. Flow rate: 1 mL/min, column temperature: 19 to 21 °C.

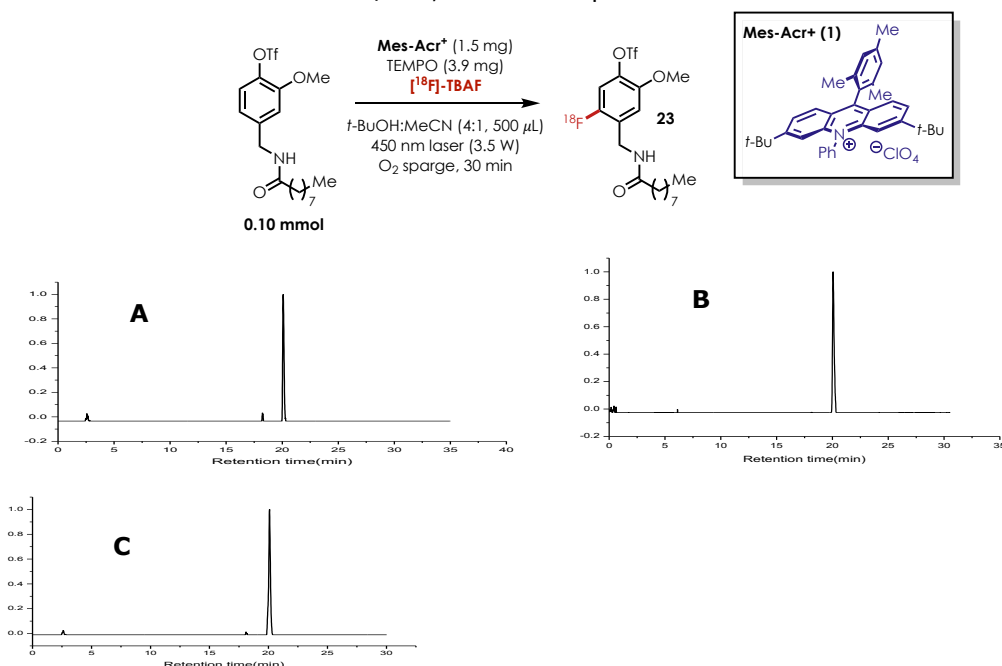

**Fig. S50.** Radio-HPLC traces of **23**

HPLC condition: Column: Phenomenex, Kinetex® 5µm EVO C18 100 Å, 250 x 4.6 mm LC Column. Solvent A: 0.1%TFA water; Solvent B: 0.1%TFA acetonitrile; Grad/isocrat: 0 to 2 min: isocratic elution at 5% solvent B, 2 to 22 min: 5% to 95% solvent B, 22 to 28 min: isocratic elution at 95% solvent B, 28 to 28.1 min: 95% to 5% solvent B, 28.1 to 30 min: isocratic elution at 5% solvent B. Flow rate: 1 mL/min, column temperature: 19 to 21 °C.

| Run number | RCY(Decay corrected) <b>23</b> |
|------------|--------------------------------|
| Run 1      | 6.0%                           |
| Run 2      | 5.5%                           |
| Run 3      | 5.7%                           |
| Average    | <b>5.7±0.3%</b>                |

**Table S35.** Average radiochemical yields for **23**

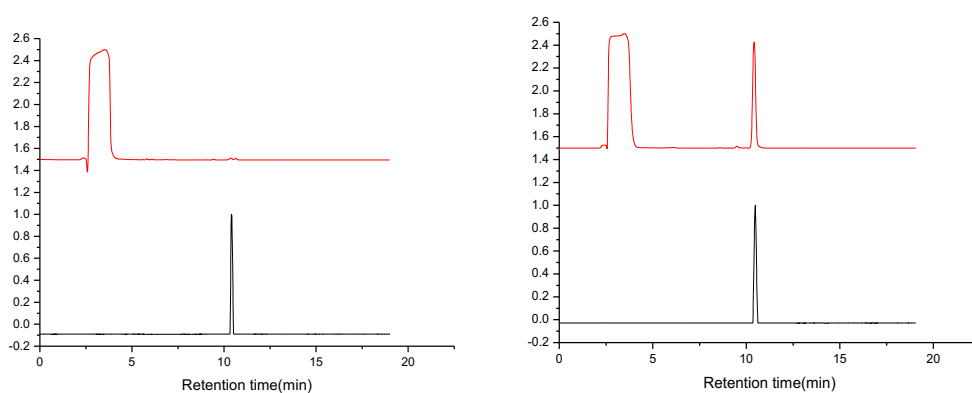

**Fig. S51.** HPLC traces of QC(**A**) and co-injection(**B**) for **23**

HPLC condition: Column: Phenomenex, Kinetex® 5µm F5 100 Å, 250 x 4.6 mm LC Column. Solvent A: 0.1%TFA water; Solvent B: 0.1%TFA acetonitrile; isocrat: 0 to 35 min: 65% solvent B. Flow rate: 1 mL/min, column temperature: 19 to 21 °C.

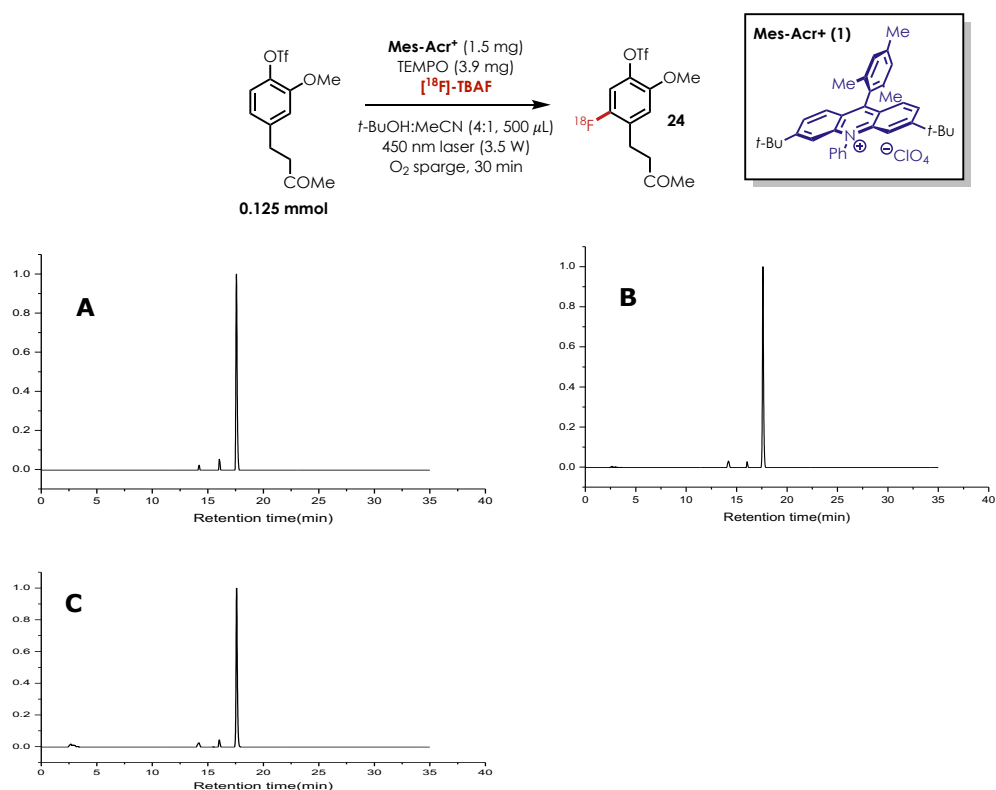

**Fig. S52.** Radio-HPLC traces of **24**

HPLC condition: Column: Phenomenex, Kinetex® 5 $\mu$ m EVO C18 100 Å, 250 x 4.6 mm LC Column. Solvent A: 0.1%TFA water; Solvent B: 0.1%TFA acetonitrile; Grad/isocrat: 0 to 2 min: isocratic elution at 5% solvent B, 2 to 22 min: 5% to 95% solvent B, 22 to 28 min: isocratic elution at 95% solvent B, 28 to 28.1 min: 95% to 5% solvent B, 28.1 to 30 min: isocratic elution at 5% solvent B. Flow rate: 1 mL/min, column temperature: 19 to 21 °C.

| Run number | RCY(Decay corrected) <b>24</b> |
|------------|--------------------------------|
| Run 1      | 26.5%                          |
| Run 2      | 28.9%                          |
| Run 3      | 26.3%                          |
| Average    | <b>27.2<math>\pm</math>2%</b>  |

**Table S36.** Average radiochemical yields for **24**

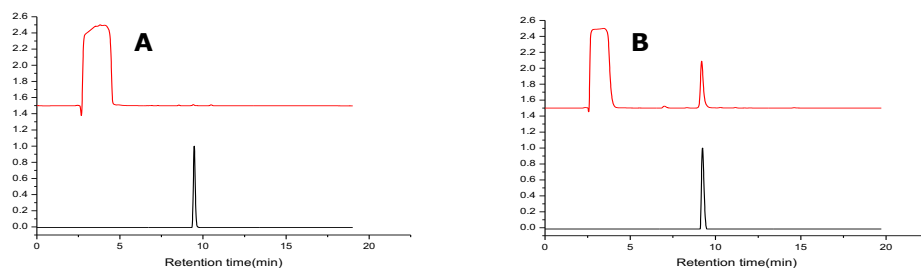

**Fig. S53.** HPLC traces of QC(A) and co-injection(B) for **24**

HPLC condition: Column: Phenomenex, Kinetex® 5µm F5 100 Å, 250 x 4.6 mm LC Column. Solvent A: 0.1%TFA water; Solvent B: 0.1%TFA acetonitrile; isocrat: 0 to 35 min: 60% solvent B. Flow rate: 1 mL/min, column temperature: 19 to 21 °C.

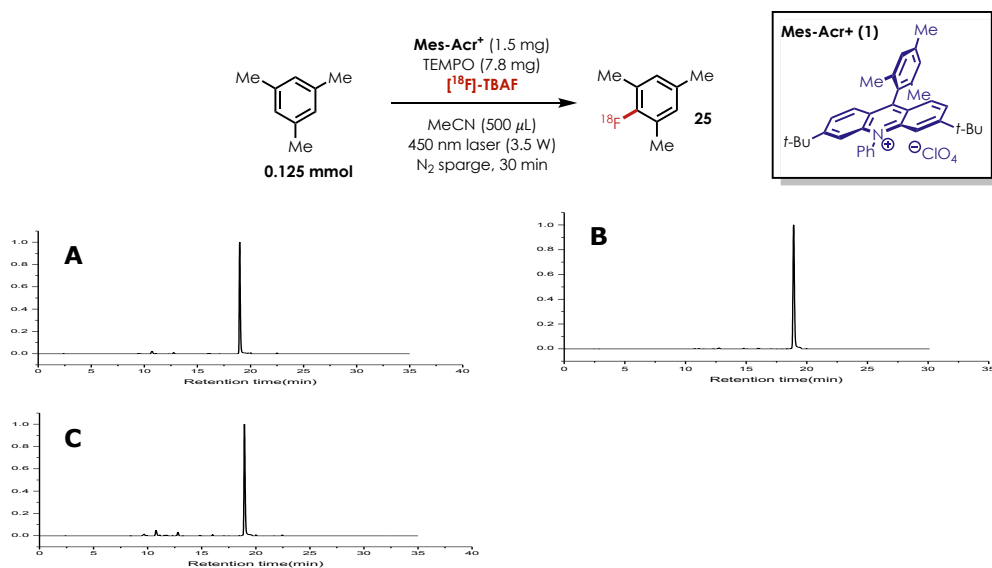

**Fig. S54.** Radio-HPLC traces of **25**

HPLC condition: Column: Phenomenex, Kinetex® 5µm EVO C18 100 Å, 250 x 4.6 mm LC Column. Solvent A: 0.1%TFA water; Solvent B: 0.1%TFA acetonitrile; Grad/isocrat: 0 to 2 min: isocratic elution at 5% solvent B, 2 to 22 min: 5% to 95% solvent B, 22 to 28 min: isocratic elution at 95% solvent B, 28 to 28.1 min: 95% to 5% solvent B, 28.1 to 30 min: isocratic elution at 5% solvent B. Flow rate: 1 mL/min, column temperature: 19 to 21 °C.

| Run number | RCY(Decay corrected) <b>25</b> |
|------------|--------------------------------|
| Run 1      | 48.2%                          |
| Run 2      | 40.2%                          |
| Run 3      | 61.5%                          |
| Average    | <b>50±11%</b>                  |

**Table S37.** Average radiochemical yields for **25**

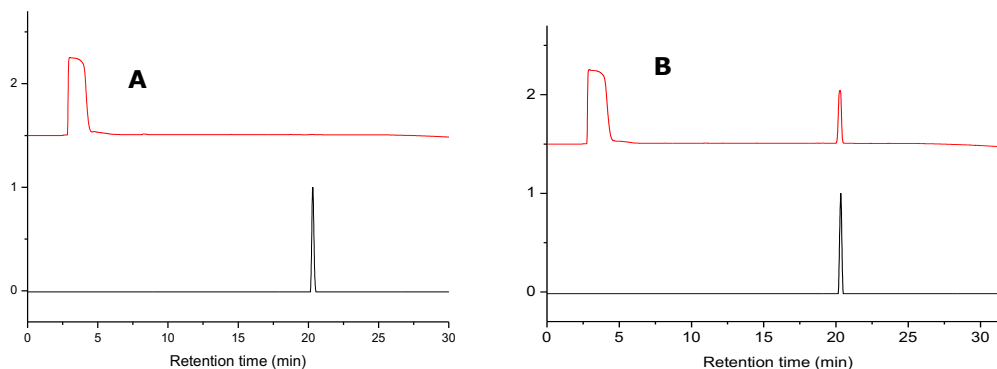

**Fig. S55.** HPLC traces of QC(A) and co-injection(B) for **25**

HPLC condition: Column: Phenomenex, Kinetex® 5µm F5 100 Å, 250 x 4.6 mm LC Column. Solvent A: 0.1%TFA water; Solvent B: 0.1%TFA acetonitrile; Grad/isocrat: 0 to 2 min: 20% to 45% solvent B, 2 to 22 min: 45% to 60% solvent B, 22 to 28 min: 60% to 95% solvent B, 28 to 28.1 min: 95% to 20% solvent B, 28.1 to 30 min: isocratic elution at 20% solvent B. Flow rate: 1 mL/min, column temperature: 19 to 21 °C

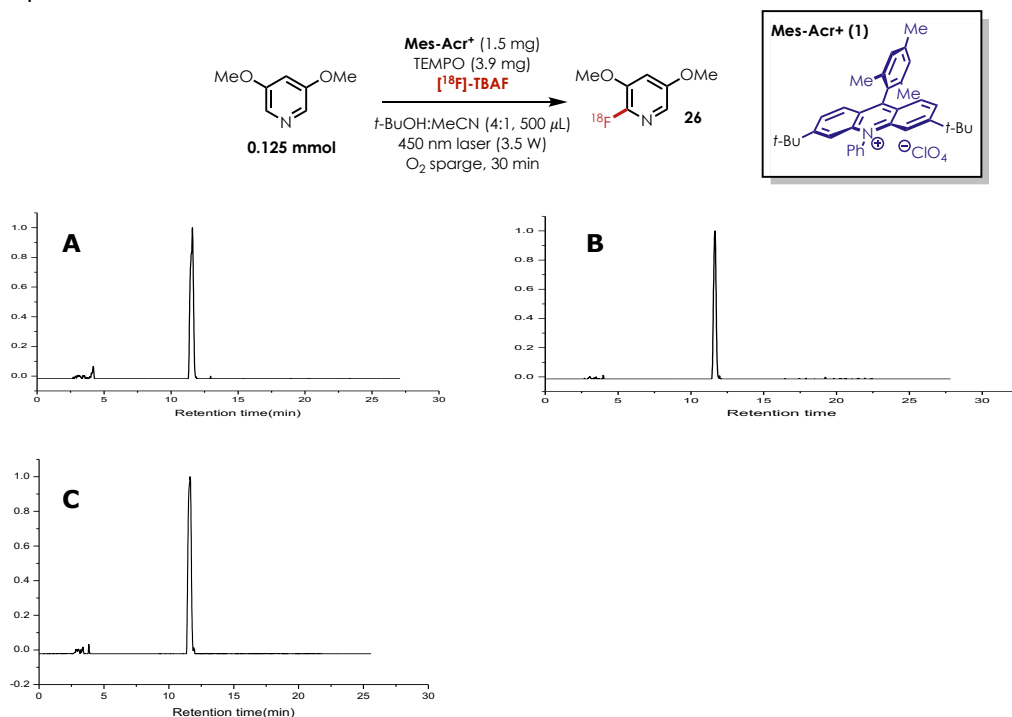

**Fig. S56.** Radio-HPLC traces of **26**

HPLC condition: Column: Phenomenex, Kinetex® 5µm EVO C18 100 Å, 250 x 4.6 mm LC Column. Solvent A: 0.1%TFA water; Solvent B: 0.1%TFA acetonitrile; Grad/isocrat: 0 to 2 min: isocratic elution at 5% solvent B, 2 to 22 min: 5% to 95% solvent B, 22 to 28 min: isocratic elution at 95% solvent B, 28 to 28.1 min: 95% to 5% solvent B, 28.1 to 30 min: isocratic elution at 5% solvent B. Flow rate: 1 mL/min, column temperature: 19 to 21 °C.

| Run number | RCY(Decay corrected) <b>26</b> |
|------------|--------------------------------|
| Run 1      | 13.1%                          |
| Run 2      | 9.7%                           |
| Run 3      | 10.6%                          |
| Average    | <b>11.1±2%</b>                 |

**Table S38.** Average radiochemical yields for **26**

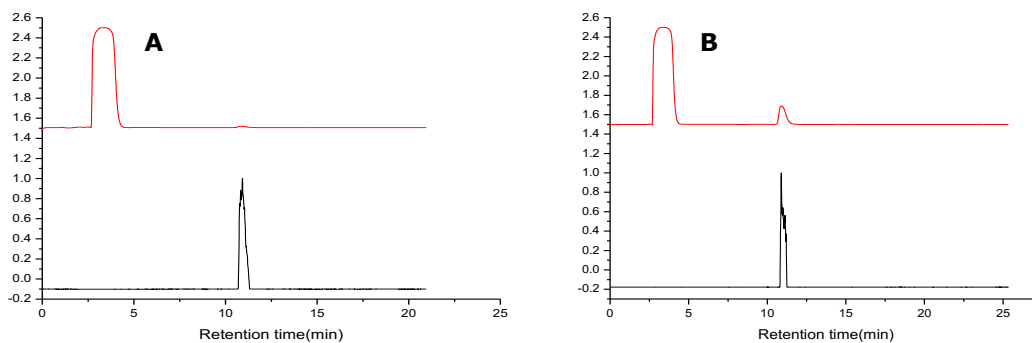

**Fig. S57.** HPLC traces of QC(A) and co-injection(B) for **26**

HPLC condition: Column: Phenomenex, Kinetex® 5µm F5 100 Å, 250 x 4.6 mm LC Column. Solvent A: 0.1%TFA water; Solvent B: 0.1%TFA acetonitrile; isocrat: 0 to 35 min:30% solvent B. Flow rate: 1 mL/min, column temperature: 19 to 21 °C.

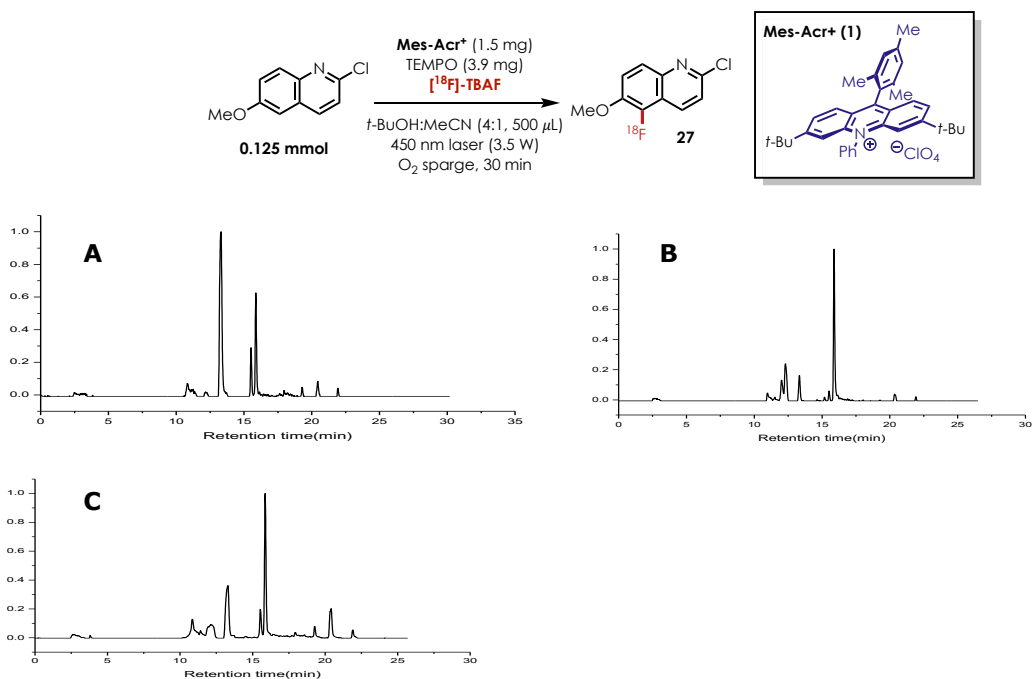

**Fig. S58.** Radio-HPLC traces of **27**

HPLC condition: Column: Phenomenex, Kinetex® 5µm EVO C18 100 Å, 250 x 4.6 mm LC Column. Solvent A: 0.1%TFA water; Solvent B: 0.1%TFA acetonitrile; Grad/isocrat: 0 to 2 min: isocratic elution at 5% solvent B, 2 to 22 min: 5% to 95% solvent B, 22 to 28 min: isocratic elution at 95% solvent B, 28 to 28.1 min: 95% to 5% solvent B, 28.1 to 30 min: isocratic elution at 5% solvent B. Flow rate: 1 mL/min, column temperature: 19 to 21 °C.

| Run number | RCY(Decay corrected) <b>27</b> |
|------------|--------------------------------|
| Run 1      | 5.6%                           |
| Run 2      | 6.6%                           |
| Run 3      | 5.7%                           |
| Average    | <b>6.0±0.6%</b>                |

**Table S39.** Average radiochemical yields for **27**

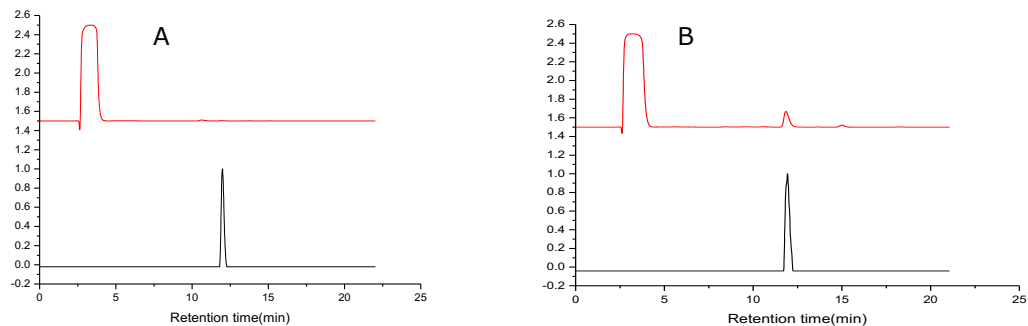

**Fig. S59.** HPLC traces of QC(A) and co-injection(B) for **27**

HPLC condition: Column: Phenomenex, Kinetex® 5µm F5 100 Å, 250 x 4.6 mm LC Column. Solvent A: 0.1%TFA water; Solvent B: 0.1%TFA acetonitrile; isocrat: 0 to 35 min:45% solvent B. Flow rate: 1 mL/min, column temperature: 19 to 21 °C.

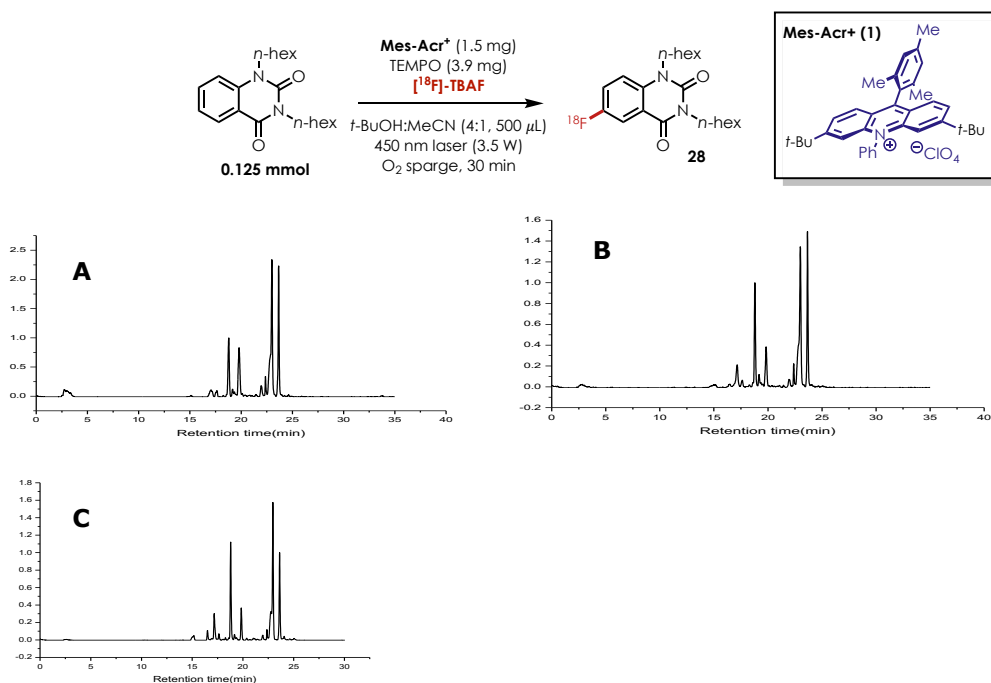

**Fig. S60.** Radio-HPLC traces of **28**

HPLC condition: Column: Phenomenex, Kinetex® 5µm EVO C18 100 Å, 250 x 4.6 mm LC Column. Solvent A: 0.1%TFA water; Solvent B: 0.1%TFA acetonitrile; Grad/isocrat: 0 to 2 min: isocratic elution at 5% solvent B, 2 to 22 min: 5% to 95% solvent B, 22 to 28 min: isocratic elution at 95% solvent B, 28 to 28.1 min: 95% to 5% solvent B, 28.1 to 30 min: isocratic elution at 5% solvent B. Flow rate: 1 mL/min, column temperature: 19 to 21 °C.

| Run number | RCY(Decay corrected) <b>28</b> |
|------------|--------------------------------|
| Run 1      | 16.1%                          |
| Run 2      | 19.4%                          |
| Run 3      | 18.3%                          |
| Average    | <b>17.9±2%</b>                 |

**Table S40.** Average radiochemical yields for **28**

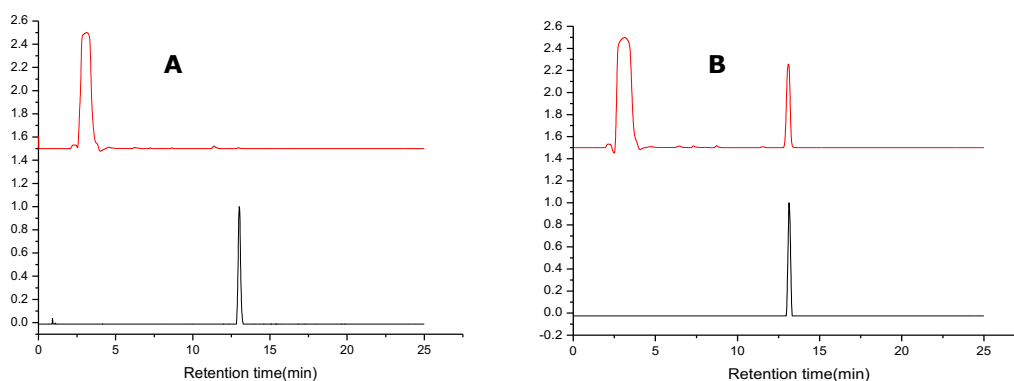

**Fig. S61.** HPLC traces of QC(**A**) and co-injection(**B**) for **28**

HPLC condition: Column: Phenomenex, Kinetex® 5µm F5 100 Å, 250 x 4.6 mm LC Column. Solvent A: 0.1%TFA water; Solvent B: 0.1%TFA acetonitrile; isocrat: 0 to 35 min: 70% solvent B. Flow rate: 1 mL/min, column temperature: 19 to 21 °C.

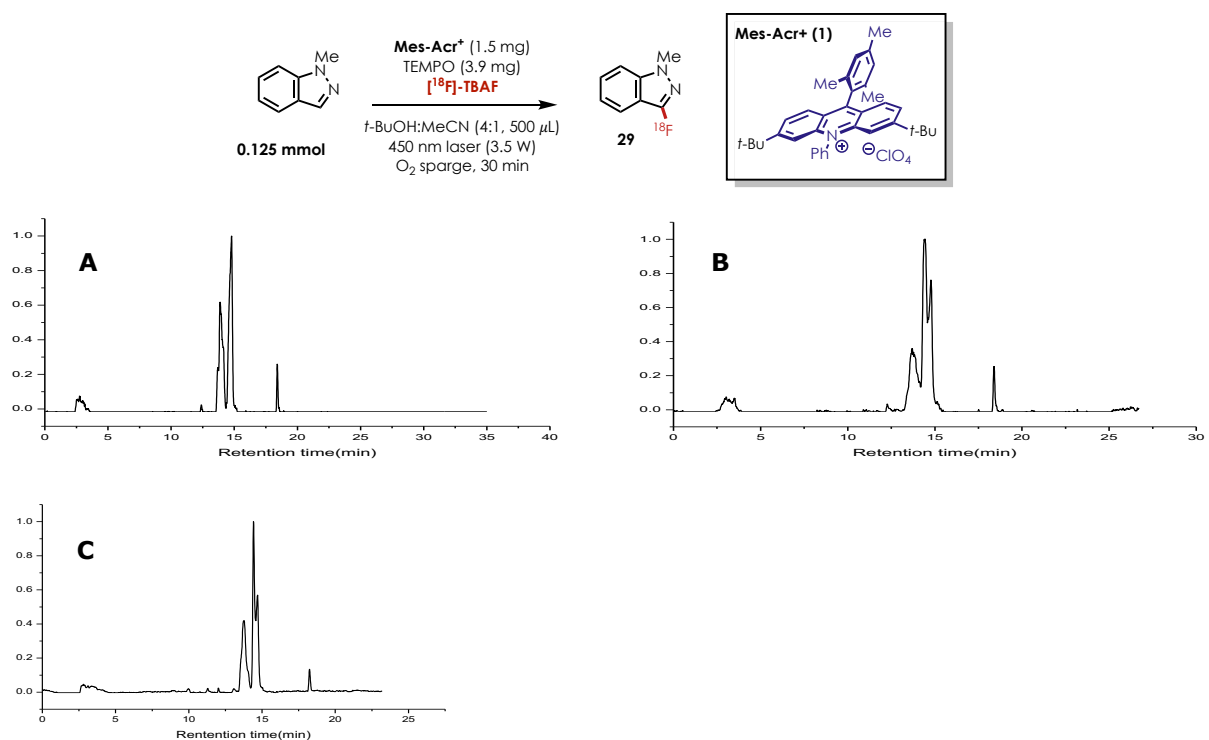

**Fig. S62.** Radio-HPLC traces of **29**

HPLC condition: Column: Phenomenex, Kinetex® 5μm EVO C18 100 Å, 250 x 4.6 mm LC Column. Solvent A: 0.1%TFA water; Solvent B: 0.1%TFA acetonitrile; Grad/isocrat: 0 to 2 min: isocratic elution at 5% solvent B, 2 to 22 min: 5% to 95% solvent B, 22 to 28 min: isocratic elution at 95% solvent B, 28 to 28.1 min: 95% to 5% solvent B, 28.1 to 30 min: isocratic elution at 5% solvent B. Flow rate: 1 mL/min, column temperature: 19 to 21 °C.

| Run number | RCY(Decay corrected) <b>29</b> |
|------------|--------------------------------|
| Run 1      | 13.1%                          |
| Run 2      | 17.2%                          |
| Run 3      | 13.0%                          |
| Average    | <b>14.4±0.3%</b>               |

**Table S41.** Average radiochemical yields for **29**

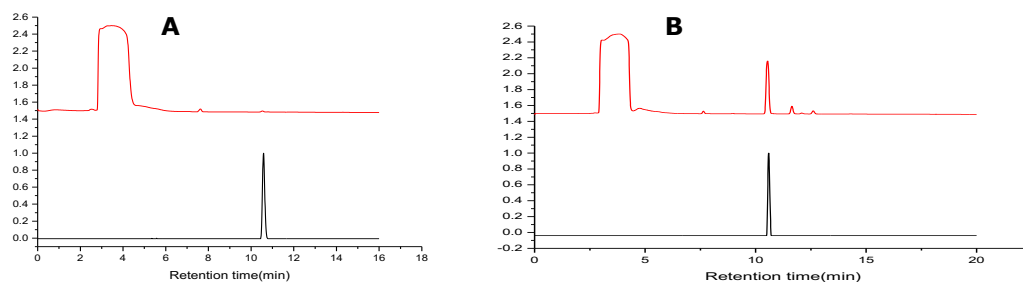

**Fig. S63.** HPLC traces of QC(A) and co-injection(B) for **29**

HPLC condition: Column: Phenomenex, Kinetex® 5µm EVO C18 100 Å, 250 x 4.6 mm LC Column. Solvent A: 0.1%TFA water; Solvent B: 0.1%TFA acetonitrile; Grad/isocrat: 0 to 2 min: isocratic elution at 5% solvent B, 2 to 22 min: 5% to 95% solvent B, 22 to 28 min: isocratic elution at 95% solvent B, 28 to 28.1 min: 95% to 5% solvent B, 28.1 to 30 min: isocratic elution at 5% solvent B. Flow rate: 1 mL/min, column temperature: 19 to 21 °C.

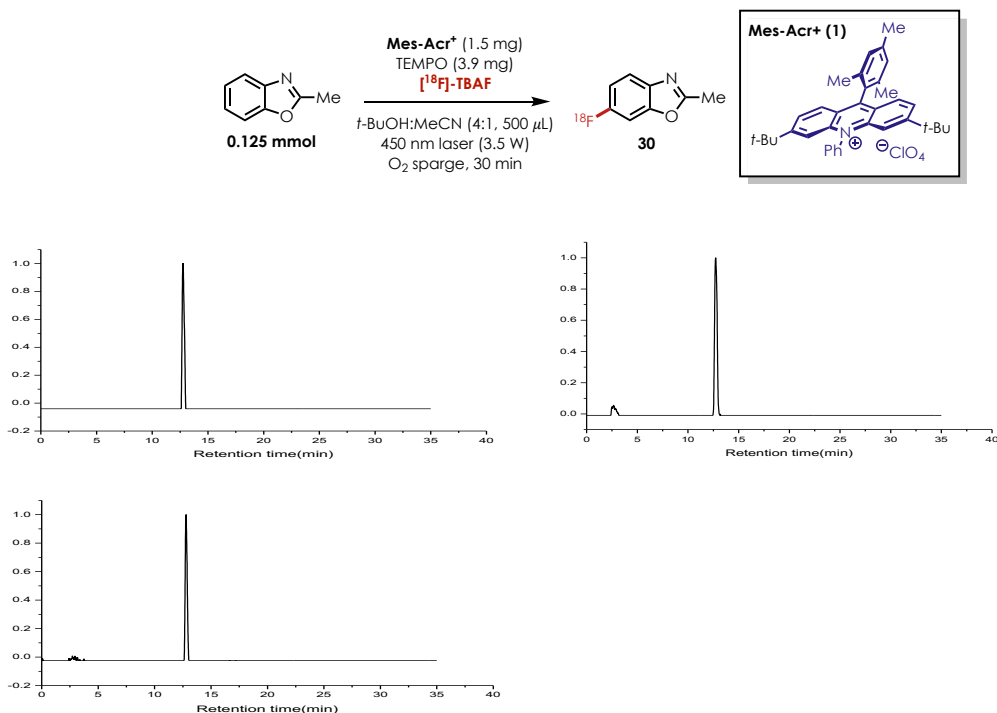

**Fig. S64.** Radio-HPLC traces of **30**

HPLC condition: Column: Phenomenex, Kinetex® 5µm EVO C18 100 Å, 250 x 4.6 mm LC Column. Solvent A: 0.1%TFA water; Solvent B: 0.1%TFA acetonitrile; Grad/isocrat: 0 to 2 min: isocratic elution at 5% solvent B, 2 to 22 min: 5% to 95% solvent B, 22 to 28 min: isocratic elution at 95% solvent B, 28 to 28.1 min: 95% to 5% solvent B, 28.1 to 30 min: isocratic elution at 5% solvent B. Flow rate: 1 mL/min, column temperature: 19 to 21 °C

| Run number | RCY(Decay corrected) <b>30</b> |
|------------|--------------------------------|
| Run 1      | 7.6%                           |
| Run 2      | 6.7%                           |
| Run 3      | 7.0%                           |
| Average    | <b>7.1±0.5%</b>                |

**Table S42.** Average radiochemical yields for **30**

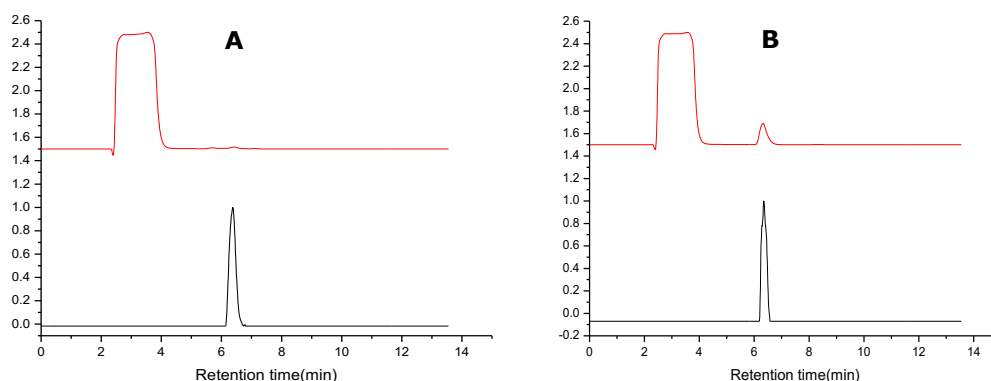

**Fig. S65.** HPLC traces of QC(A) and co-injection(B) for **30**

HPLC condition: Column: Phenomenex, Kinetex® 5µm EVO C18 100 Å, 250 x 4.6 mm LC Column.  
 Solvent A: 0.1%TFA water; Solvent B: 0.1%TFA acetonitrile; isocrat: 0 to 35 min: 35% solvent B. Flow rate: 1 mL/min, column temperature: 19 to 21 °C.

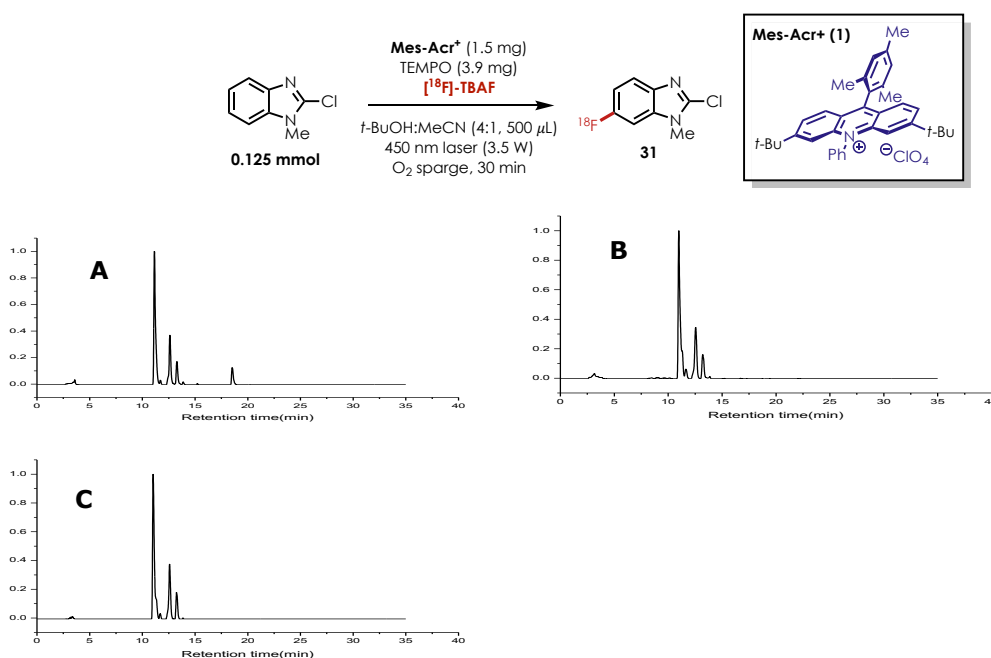

**Fig. S66.** Radio-HPLC traces of **31**

HPLC condition: Column: Phenomenex, Kinetex® 5µm EVO C18 100 Å, 250 x 4.6 mm LC Column.  
 Solvent A: 0.1%TFA water; Solvent B: 0.1%TFA acetonitrile; Grad/isocrat: 0 to 2 min: isocratic elution at 5% solvent B, 2 to 22 min: 5% to 95% solvent B, 22 to 28 min: isocratic elution at 95% solvent B, 28 to 28.1 min: 95% to 5% solvent B, 28.1 to 30 min: isocratic elution at 5% solvent B.  
 Flow rate: 1 mL/min, column temperature: 19 to 21 °C.

| Run number | RCY(Decay corrected) <b>31</b> |
|------------|--------------------------------|
| Run 1      | 10.1%                          |
| Run 2      | 12%                            |
| Run 3      | 10.8%                          |
| Average    | <b>11.1±1%</b>                 |

**Table S43.** Average radiochemical yields for **31**

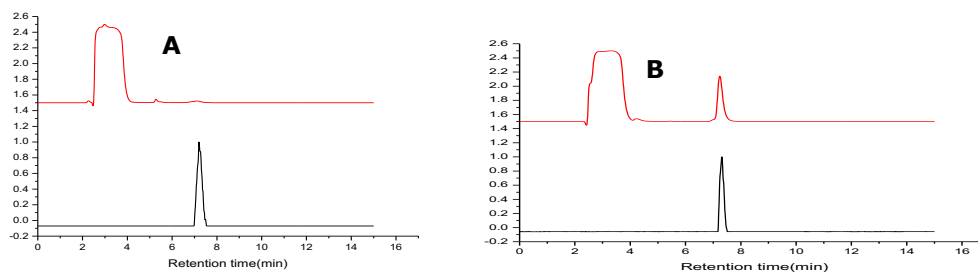

**Fig. S67.** HPLC traces of QC(A) and co-injection(B) for **31**

HPLC condition: Column: Phenomenex, Kinetex® 5µm EVO C18 100 Å, 250 x 4.6 mm LC Column. Solvent A: 0.1%TFA water; Solvent B: 0.1%TFA acetonitrile; isocrat: 0 to 35 min: 30% solvent B. Flow rate: 1 mL/min, column temperature: 19 to 21 °C.

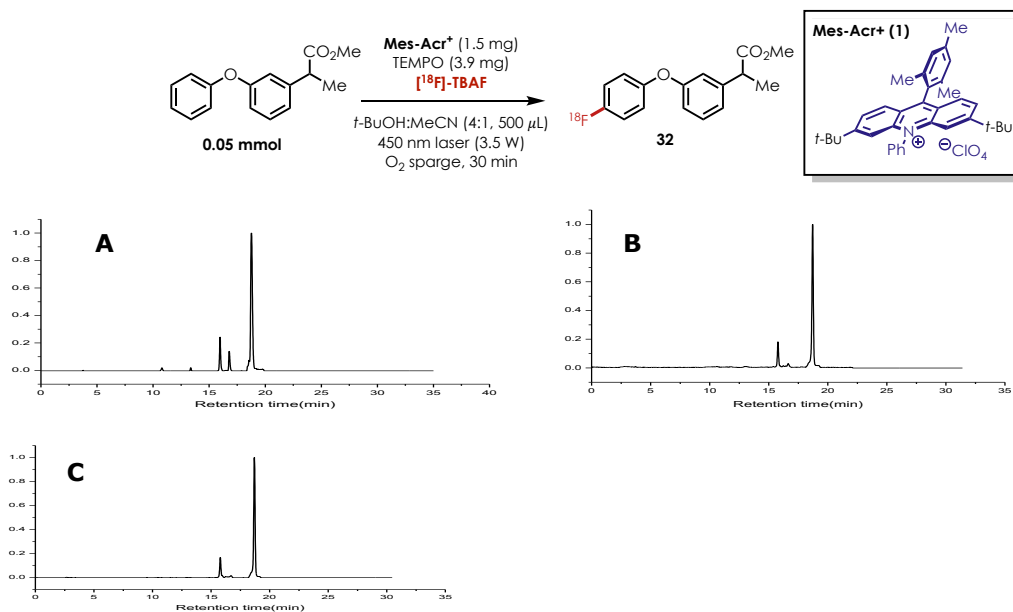

**Fig. S68.** Radio-HPLC traces of **32**

HPLC condition: Column: Phenomenex, Kinetex® 5µm EVO C18 100 Å, 250 x 4.6 mm LC Column. Solvent A: 0.1%TFA water; Solvent B: 0.1%TFA acetonitrile; Grad/isocrat: 0 to 2 min: isocratic elution at 5% solvent B, 2 to 22 min: 5% to 95% solvent B, 22 to 28 min: isocratic elution at 95% solvent B, 28 to 28.1 min: 95% to 5% solvent B, 28.1 to 30 min: isocratic elution at 5% solvent B. Flow rate: 1 mL/min, column temperature: 19 to 21 °C.

| Run number | RCY(Decay corrected) <b>32</b> |
|------------|--------------------------------|
| Run 1      | 38.8%                          |
| Run 2      | 40.4%                          |
| Run 3      | 39.6%                          |
| Average    | <b>39.6±1%</b>                 |

**Table S44.** Average radiochemical yields for **32**

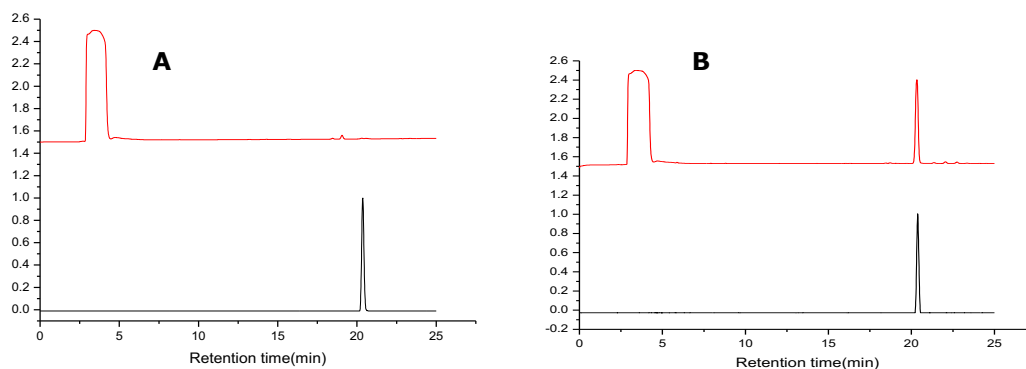

**Fig. S69.** HPLC traces of QC(A) and co-injection(B) for **32**

HPLC condition: Column: Phenomenex, Kinetex® 5µm EVO C18 100 Å, 250 x 4.6 mm LC Column. Solvent A: 0.1%TFA water; Solvent B: 0.1%TFA acetonitrile; Grad/isocrat: 0 to 2 min: isocratic elution at 5% solvent B, 2 to 22 min: 5% to 95% solvent B, 22 to 28 min: isocratic elution at 95% solvent B, 28 to 28.1 min: 95% to 5% solvent B, 28.1 to 30 min: isocratic elution at 5% solvent B. Flow rate: 1 mL/min, column temperature: 19 to 21 °C.

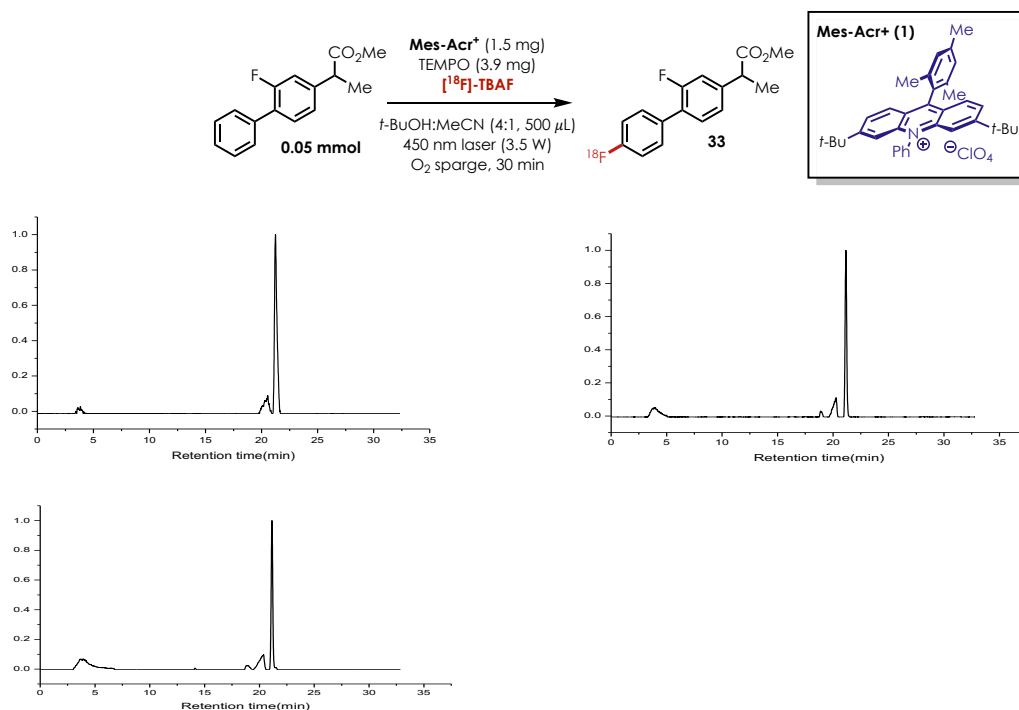

**Fig. S70.** Radio-HPLC traces of **33**

HPLC condition: Column: Phenomenex, Kinetex® 5µm F5 100 Å, 250 x 4.6 mm LC Column. Solvent A: 0.1%TFA water; Solvent B: 0.1%TFA acetonitrile;Grad/isocrat: 0 to 2 min: 20% to 45% solvent B, 2 to 22 min: 45% to 60% solvent B, 22 to 28 min: 60% to 95% solvent B, 28 to 28.1 min: 95% to 20% solvent B, 28.1 to 30 min: isocratic elution at 20% solvent B. Flow rate: 1 mL/min, column temperature: 19 to 21 °C.

| Run number | RCY(Decay corrected) <b>33</b> |
|------------|--------------------------------|
| Run 1      | 43%                            |
| Run 2      | 32.9%                          |
| Run 3      | 34.4%                          |
| Average    | <b>36.8±6%</b>                 |

**Table S45.** Average radiochemical yields for **33**

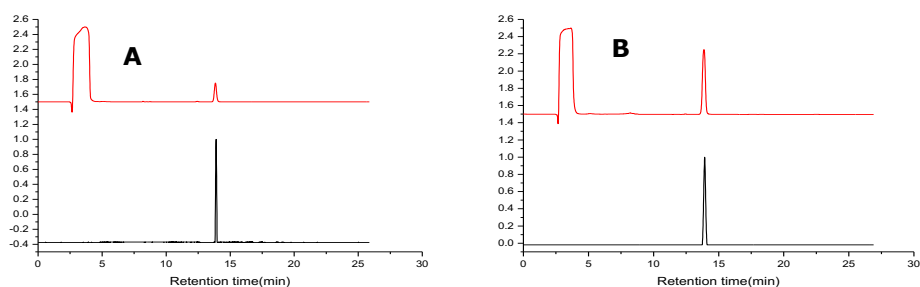

**Fig. S71.** HPLC traces of QC(A) and co-injection(B) for **33**

HPLC condition: Column: Phenomenex, Kinetex® 5µm F5 100 Å, 250 x 4.6 mm LC Column. Solvent A: 0.1%TFA water; Solvent B: 0.1%TFA acetonitrile;isocrat: 0 to 35 min:**55%** solvent B. Flow rate: 1 mL/min, column temperature: 19 to 21 °C.

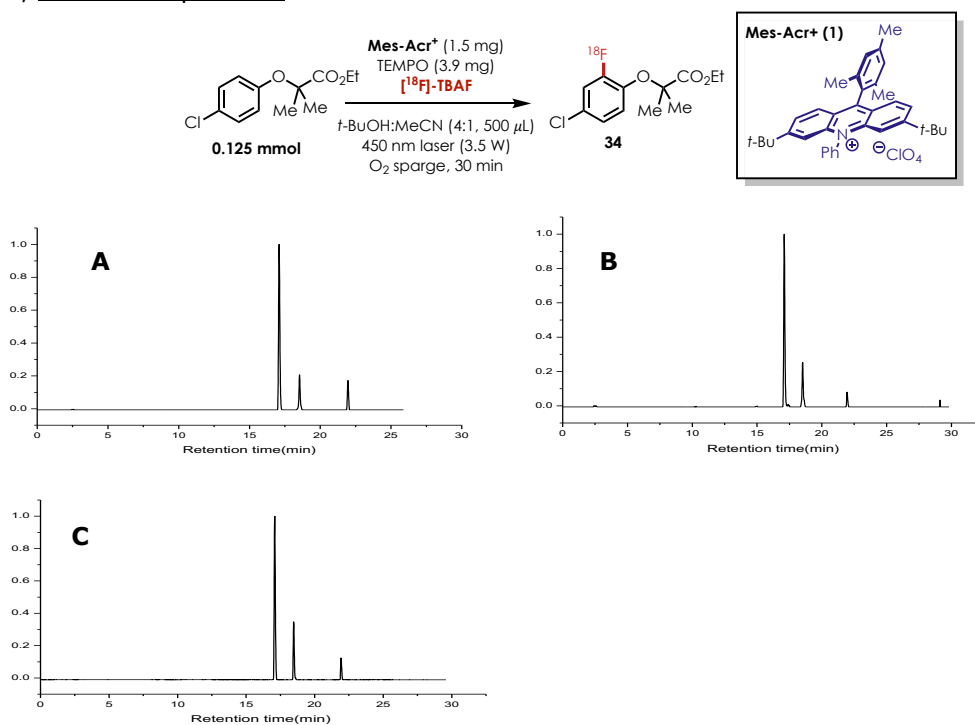

**Fig. S72.** Radio-HPLC traces of **34**

HPLC condition: Column: Phenomenex, Kinetex® 5µm EVO C18 100 Å, 250 x 4.6 mm LC Column. Solvent A: 0.1%TFA water; Solvent B: 0.1%TFA acetonitrile; Grad/isocrat: 0 to 2 min: isocratic elution at 5% solvent B, 2 to 22 min: 5% to 95% solvent B, 22 to 28 min: isocratic elution at 95% solvent B, 28 to 28.1 min: 95% to 5% solvent B, 28.1 to 30 min: isocratic elution at 5% solvent B. Flow rate: 1 mL/min, column temperature: 19 to 21 °C.

| Run number | RCY(Decay corrected) <b>34</b> |
|------------|--------------------------------|
| Run 1      | 4.0%                           |
| Run 2      | 3.7%                           |
| Run 3      | 3.5%                           |
| Average    | <b>3.7±0.3%</b>                |

**Table S46.** Average radiochemical yields for **34**

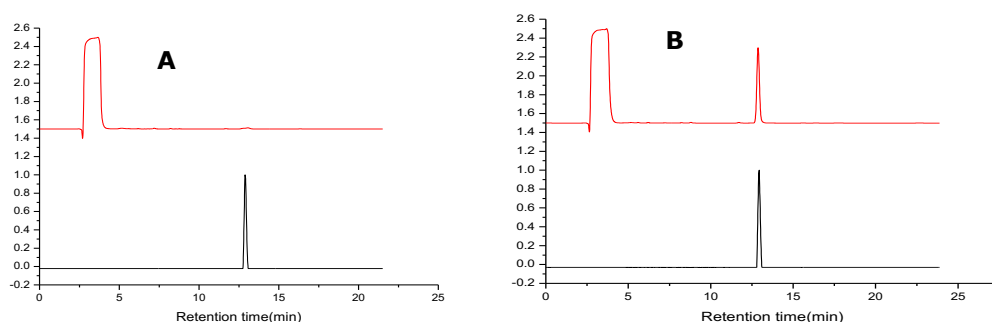

**Fig. S73.** HPLC traces of QC(A) and co-injection(B) for **34**

HPLC condition: Column: Phenomenex, Kinetex® 5µm F5 100 Å, 250 x 4.6 mm LC Column. Solvent A: 0.1%TFA water; Solvent B: 0.1%TFA acetonitrile; isocrat: 0 to 35 min: 55% solvent B. Flow rate: 1 mL/min, column temperature: 19 to 21 °C.

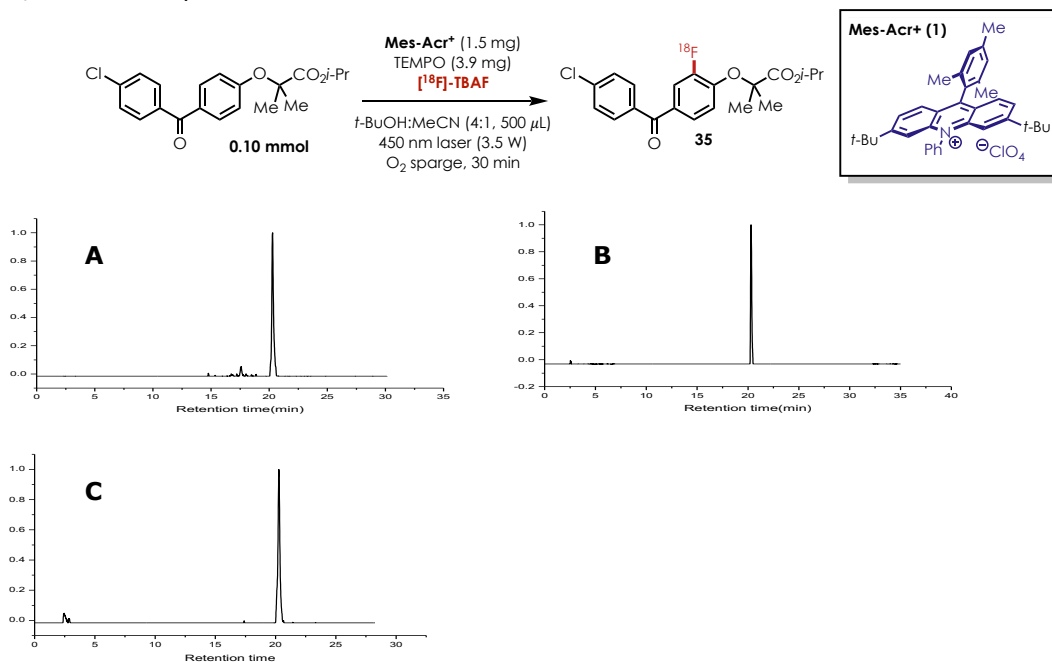

**Fig. S74.** Radio-HPLC traces of **35**

HPLC condition: Column: Phenomenex, Kinetex® 5µm EVO C18 100 Å, 250 x 4.6 mm LC Column. Solvent A: 0.1%TFA water; Solvent B: 0.1%TFA acetonitrile; Grad/isocrat: 0 to 2 min: isocratic elution at 5% solvent B, 2 to 22 min: 5% to 95% solvent B, 22 to 28 min: isocratic elution at 95% solvent B, 28 to 28.1 min: 95% to 5% solvent B, 28.1 to 30 min: isocratic elution at 5% solvent B. Flow rate: 1 mL/min, column temperature: 19 to 21 °C.

| Run number | RCY(Decay corrected) <b>35</b> |
|------------|--------------------------------|
| Run 1      | 6.0%                           |
| Run 2      | 5.2%                           |
| Run 3      | 5.5%                           |
| Average    | <b>5.6±0.4%</b>                |

**Table S47.** Average radiochemical yields for **35**

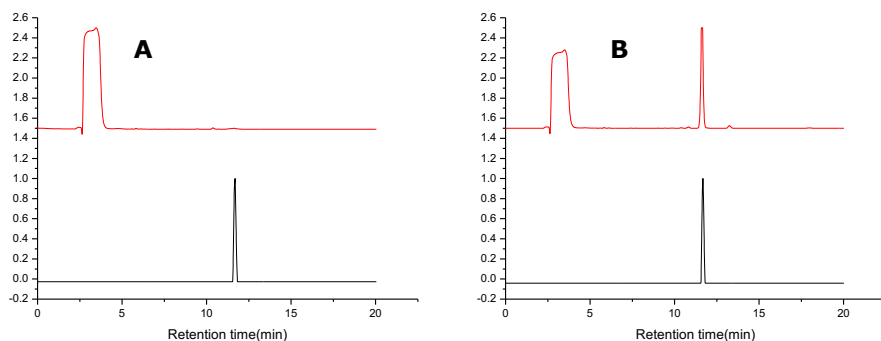

**Fig. S75.** HPLC traces of QC(**A**) and co-injection(**B**) for **35**

HPLC condition: Column: Phenomenex, Kinetex® 5µm F5 100 Å, 250 x 4.6 mm LC Column. Solvent A: 0.1%TFA water; Solvent B: 0.1%TFA acetonitrile;isocrat: 0 to 35 min:**65%** solvent B. Flow rate: 1 mL/min, column temperature: 19 to 21 °C.

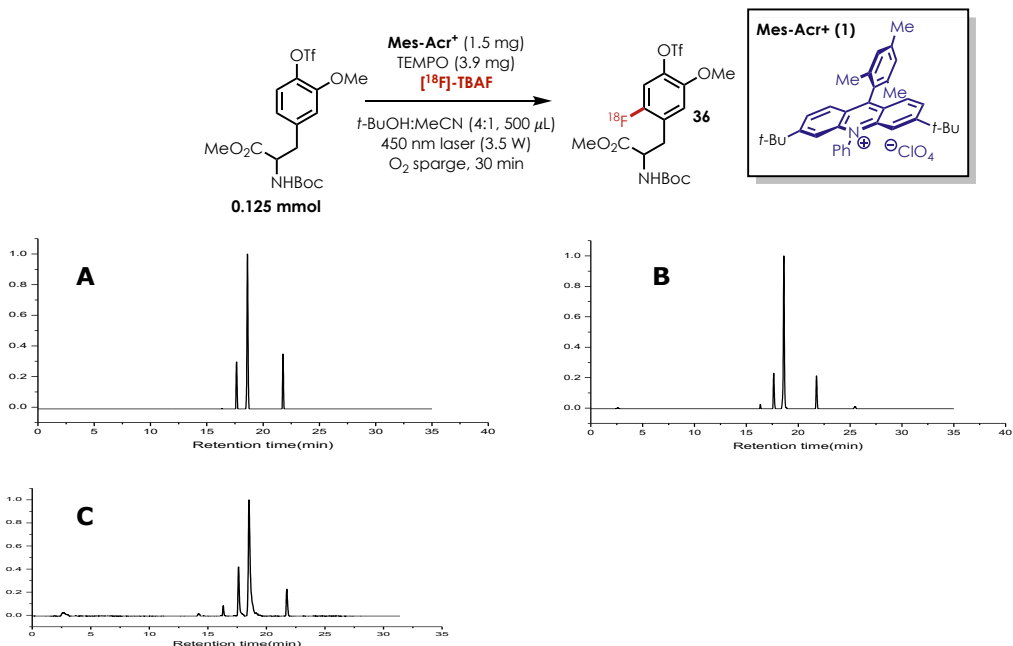

**Fig. S76.** Radio-HPLC traces of **36**

HPLC condition: Column: Phenomenex, Kinetex® 5 $\mu$ m EVO C18 100 Å, 250 x 4.6 mm LC Column. Solvent A: 0.1%TFA water; Solvent B: 0.1%TFA acetonitrile; Grad/isocrat: 0 to 2 min: isocratic elution at 5% solvent B, 2 to 22 min: 5% to 95% solvent B, 22 to 28 min: isocratic elution at 95% solvent B, 28 to 28.1 min: 95% to 5% solvent B, 28.1 to 30 min: isocratic elution at 5% solvent B. Flow rate: 1 mL/min, column temperature: 19 to 21 °C.

| Run number | RCY(Decay corrected) <b>36</b> |
|------------|--------------------------------|
| Run 1      | 8.0%                           |
| Run 2      | 8.3%                           |
| Run 3      | 9.8%                           |
| Average    | <b>8.7<math>\pm</math>1%</b>   |

**Table S48.** Average radiochemical yields for **36**

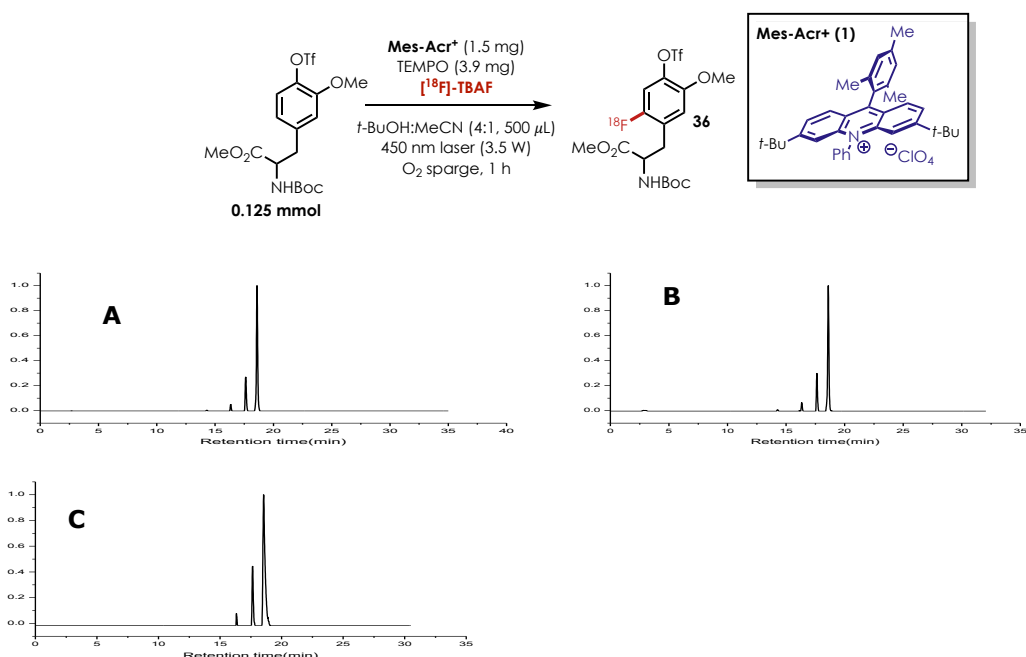

**Fig. S77.** Radio-HPLC traces of **36**

HPLC condition: Column: Phenomenex, Kinetex® 5μm EVO C18 100 Å, 250 x 4.6 mm LC Column. Solvent A: 0.1%TFA water; Solvent B: 0.1%TFA acetonitrile; Grad/isocrat: 0 to 2 min: isocratic elution at 5% solvent B, 2 to 22 min: 5% to 95% solvent B, 22 to 28 min: isocratic elution at 95% solvent B, 28 to 28.1 min: 95% to 5% solvent B, 28.1 to 30 min: isocratic elution at 5% solvent B. Flow rate: 1 mL/min, column temperature: 19 to 21 °C.

| Run number | RCY(Decay corrected) <b>36</b> |
|------------|--------------------------------|
| Run 1      | 21.4%                          |
| Run 2      | 20.6%                          |
| Run 3      | 21.7%                          |
| Average    | <b>21.2±0.5%</b>               |

**Table S49.** Average radiochemical yields for **36**

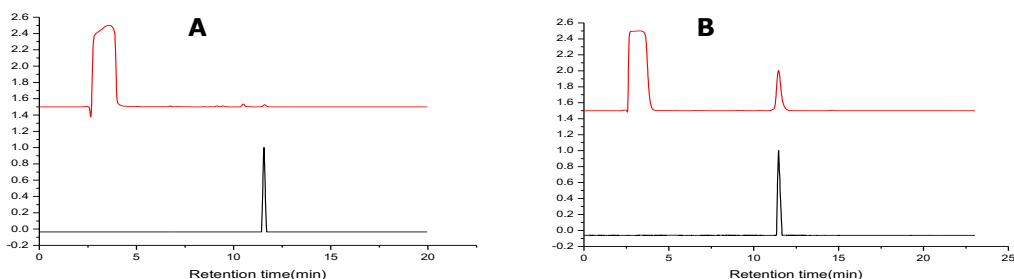

**Fig. S78.** HPLC traces of QC(A) and co-injection(B) for **36**

HPLC condition: Column: Phenomenex, Kinetex® 5μm F5 100 Å, 250 x 4.6 mm LC Column. Solvent A: 0.1%TFA water; Solvent B: 0.1%TFA acetonitrile; isocrat: 0 to 35 min: 60% solvent B. Flow rate: 1 mL/min, column temperature: 19 to 21 °C.

### 5.6.3 Synthesis of [ $^{18}\text{F}$ ]DOPA (**37**):

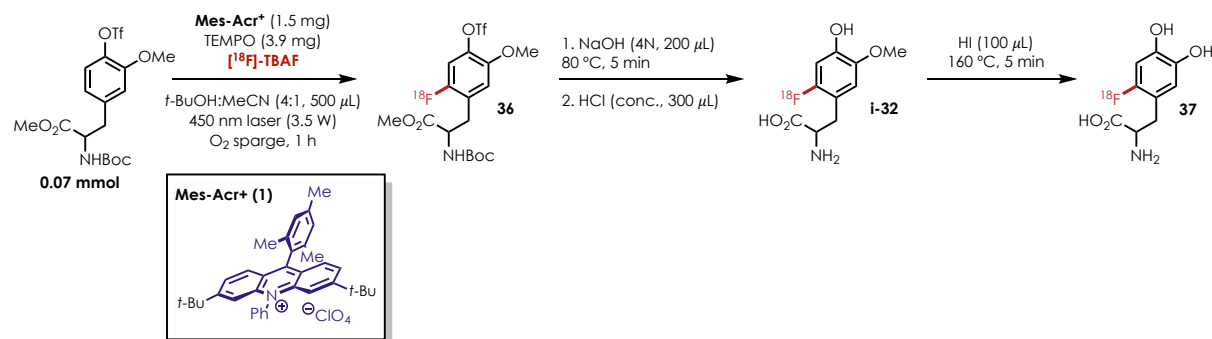

#### 5.6.3.1 Synthesis of **i-32** and **37**:

Compound **36** was obtained using the procedure described above with 0.07mmol of the non-fluorinated congener (13.6±0.5% (n=3) isolated RCY). The purified compound **36** was collected in a 5ml V-Vial, to which 200μL of 4N NaOH solution was added. The V-vial was sealed with a Teflon-lined septum screw cap equipped with a vent needle. The solution was heated at 80°C with a positive N<sub>2</sub> flow for 5min. The N<sub>2</sub> flow was then stopped and the vent needle removed before 300μL of concentrated HCl was added to quench the reaction. 200μL of saturated NaHCO<sub>3</sub> solution was subsequently added to the vial and the solution was diluted with DI H<sub>2</sub>O to about 1 mL of reaction volume before being analyzed and purified on HPLC to obtain the isolated intermediate **i-32** in 13.2±0.6% (n=3) RCY.

Intermediate **i-32** was then placed in a 5 mL V-Vial, to which was added 100 μL of HI. The reaction vessel was then sealed with a Teflon-lined septum screw cap and heated for 5 min at 160°C in a preheated heating block. The V-Vial was then removed from the heating bath and cooled to room temperature with an ice bath. 100μL of saturated NaHCO<sub>3</sub> was added to quench the reaction and the resulting solution was diluted to 1mL with DI H<sub>2</sub>O before being analyzed and purified on HPLC to yield isolated **<sup>18</sup>F-DOPA (37)** in 12.3±1%(n=3) RCY. [ $^{18}\text{F}$ ]DOPA RCY was calculated as the products of each decay corrected deprotection RCY of each deprotection step and the initial isolated decay corrected RCY of **36**. Column conditions for the purification are listed below.

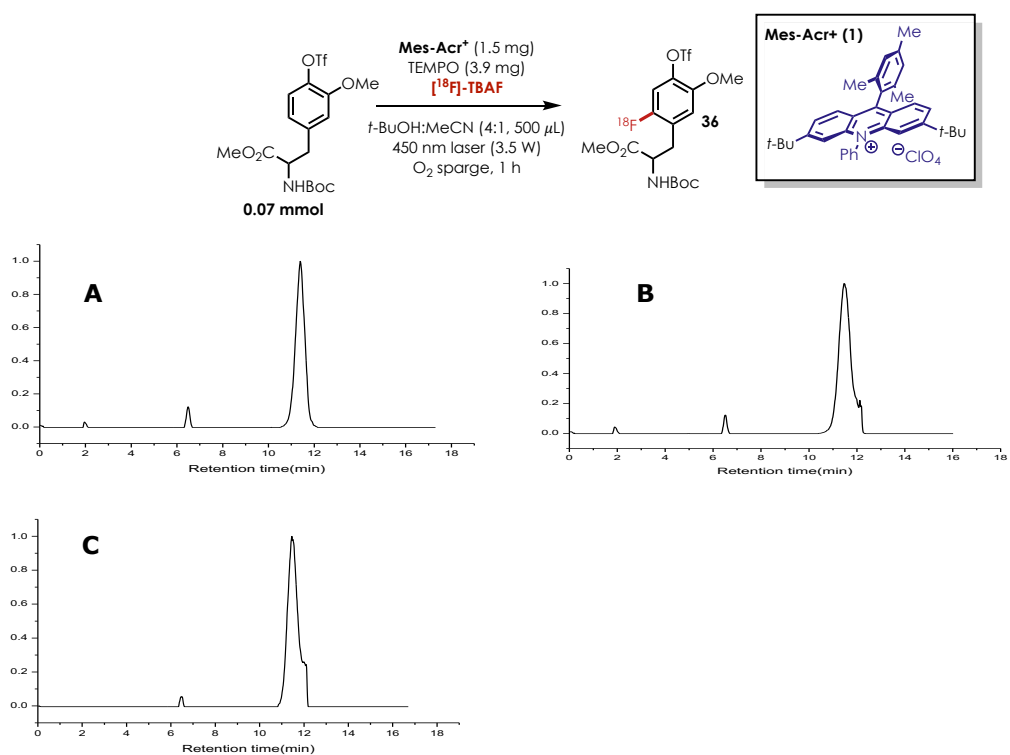

**Fig. S79.** Radio-HPLC traces of **36**

HPLC condition: Column: Gemini 5μm EVO C18 110 Å, 250 x 10.0 mm LC Column. Solvent A: 0.1%TFA water; Solvent B: 0.1%TFA acetonitrile; isocrat: 0 to 35 min: 60% solvent B. Flow rate: 5mL/min, column temperature: 19 to 21 °C.

| Run number | RCY(Decay corrected) <b>36</b> |
|------------|--------------------------------|
| Run 1      | 14.1%                          |
| Run 2      | 13.1%                          |
| Run 3      | 13.5%                          |
| Average    | <b>13.6±0.5%</b>               |

**Table S50.** Average radiochemical yields for **36**

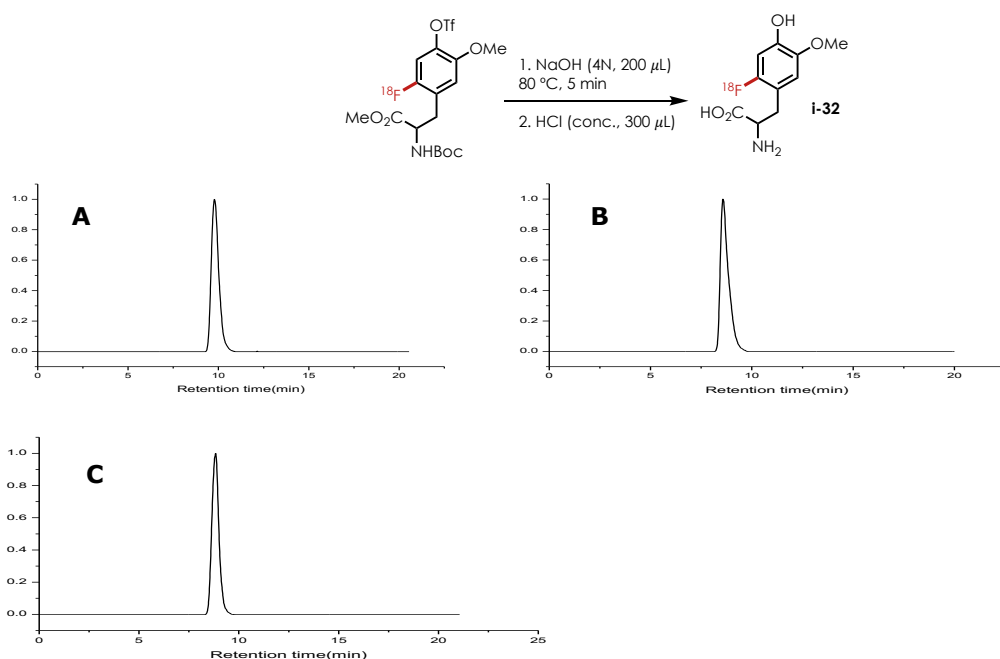

**Fig. S80.** Radio-HPLC traces of **i-32**

HPLC condition: Column: Phenomenex, Kinetex® 5 $\mu\text{m}$  EVO C18 100 Å, 250 x 4.6 mm LC Column.  
 Solvent A: 0.1%TFA water; Solvent B: 0.1%TFA acetonitrile;isocrat: 0 to 35 min: 3% solvent B. Flow rate: 1 mL/min, column temperature: 19 to 21  $^{\circ}\text{C}$ .

| Run number | Deprotection RCY (Decay corrected) <b>i-32</b> | Actual RCY(Decay corrected) <b>i-32</b> |
|------------|------------------------------------------------|-----------------------------------------|
| Run 1      | 98.1%                                          | 13.8%                                   |
| Run 2      | 97.1%                                          | 12.7%                                   |
| Run 3      | 96.0%                                          | 13.0%                                   |
| Average    | <b>97.1<math>\pm</math>1%</b>                  | <b>13.2<math>\pm</math>0.6%</b>         |

**Table S51.** Average deprotection and actual radiochemical yields for **i-32**

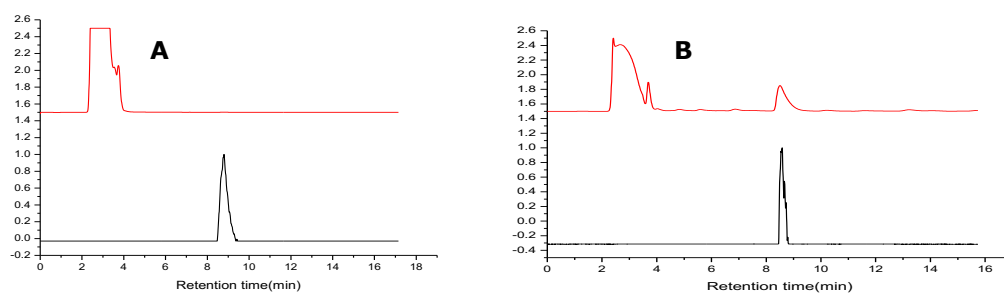

**Fig. S81** HPLC traces of QC(A) and co-injection(B) for **i-32**

HPLC condition: Column: Phenomenex, Kinetex® 5 $\mu\text{m}$  EVO C18 100 Å, 250 x 4.6 mm LC Column.  
 Solvent A: 0.1%TFA water; Solvent B: 0.1%TFA acetonitrile;isocrat: 0 to 35 min: 3% solvent B. Flow rate: 1 mL/min, column temperature: 19 to 21  $^{\circ}\text{C}$ .

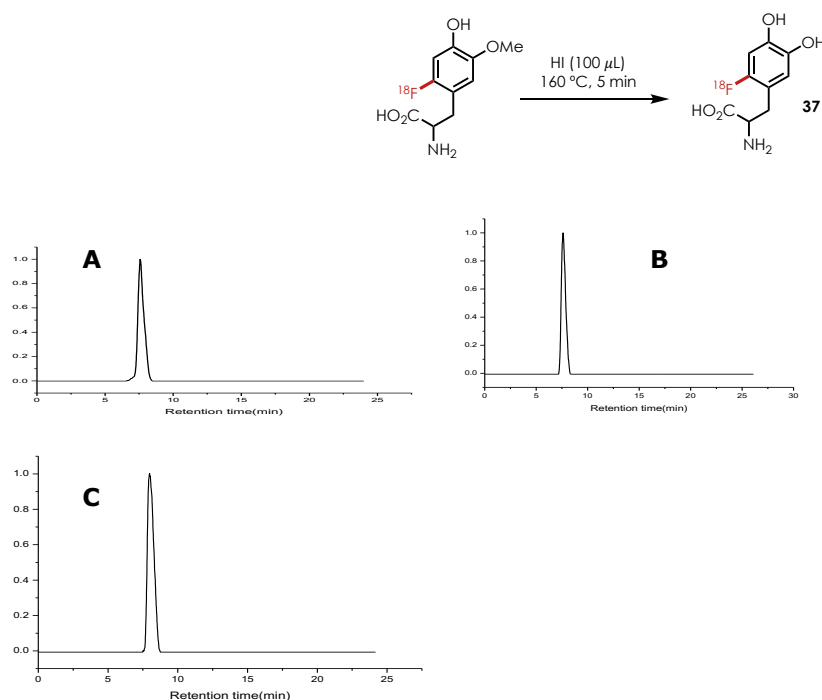

**Fig. S82.** Radio-HPLC traces of **37**

HPLC condition: Column: Phenomenex® 4 $\mu\text{m}$  Hydro-RP 80 Å, 150 x 4.6 mm LC Column. Solvent A: 70mM  $\text{KH}_2\text{PO}_4$  in water isocrat: 0 to 35 min: 100% solvent A. Flow rate: 0.8 mL/min, column temperature: 19 to 21  $^\circ\text{C}$ .

| Run number | Deprotection RCY (Decay corrected) <b>37</b> | Actual RCY(Decay corrected) <b>37</b> |
|------------|----------------------------------------------|---------------------------------------|
| Run 1      | 96.7%                                        | 13.4%                                 |
| Run 2      | 91.6%                                        | 11.7%                                 |
| Run 3      | 90.0%                                        | 11.7%                                 |
| Average    | <b>92.8<math>\pm</math>4%</b>                | <b>12.2<math>\pm</math>1%</b>         |

**Table S52.** Average deprotection and actual radiochemical yields for **37**

**Average RCY (Decay corrected) of [ $^{18}\text{F}$ ]-DOPA after deprotection: 12.2  $\pm$  1.0%**

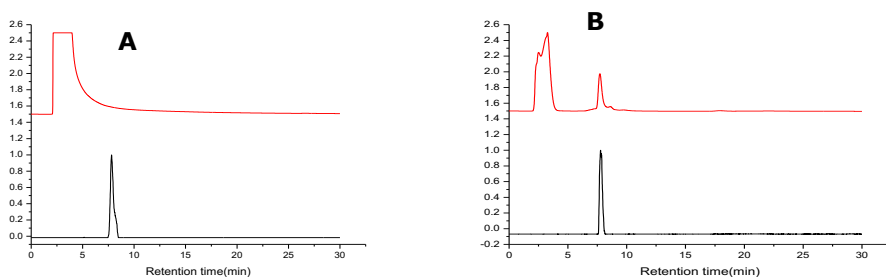

**Fig. S83.** HPLC traces of QC(A) and co-injection(B) for **37**

HPLC condition: Column: Phenomenex® 4 $\mu\text{m}$  Hydro-RP 80 Å, 150 x 4.6 mm LC Column. Solvent A: 70mM  $\text{KH}_2\text{PO}_4$  in water isocrat: 0 to 35 min: 100% solvent A. Flow rate: 0.8 mL/min, column temperature: 19 to 21  $^\circ\text{C}$ .

### 5.6.4 Synthesis of [ $^{18}\text{F}$ ]2-methoxy-5-fluoro-phenylalanine (**39**)

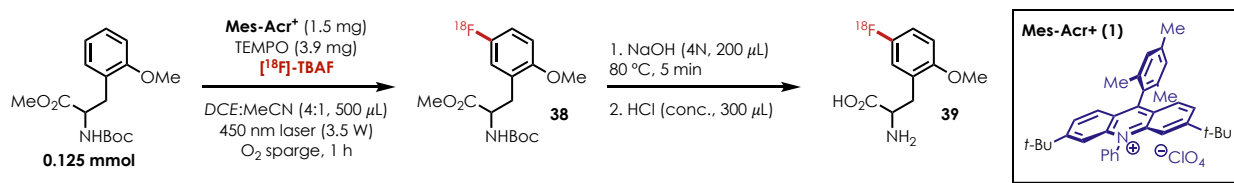

Compound **38** was obtained following a modified version of procedure A, using 0.125mmol of substrate in a 4:1 DCE:MeCN solution under an anaerobic atmosphere ( $\text{N}_2$  sparge) with 0.8 equiv of TEMPO ( $5.0 \pm 0.5\%$  ( $n=3$ ) isolated RCY). The product **38** was collected in a 5ml V-Vial without further purification, to which 200 $\mu\text{L}$  of 4N NaOH solution was added. The V-vial was sealed with a Teflon-lined septum screw cap equipped with a vent needle. The solution was heated at 80°C with a positive  $\text{N}_2$  flow for 5min. The  $\text{N}_2$  flow was then stopped and the vent needle removed before 300 $\mu\text{L}$  of concentrated HCl was added to quench the reaction. The solution was diluted with DI  $\text{H}_2\text{O}$  before being analyzed and purified on HPLC to obtain [ $^{18}\text{F}$ ]2-Methoxy-5-fluoro-phenylalanine (**39**) in  $4.9 \pm 0.5\%$  ( $n=2$ ) RCY. Collected product **39** was then dried under reduced pressure rotary evaporator to remove excess MeCN from the solution. The solution of **39** was then neutralized to pH 7 by adding NaOH (1N) and phosphate-buffered saline (PBS, 10X). **39** was reformulated in a 1X PBS solution for use in PET imaging studies.

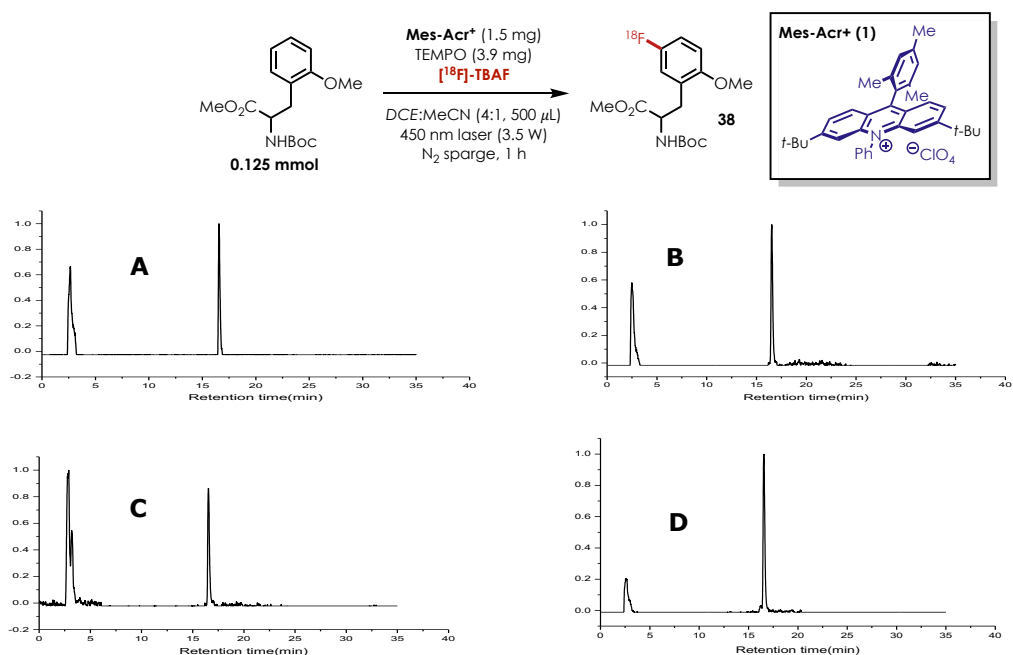

**Fig. S84** Radio-HPLC traces of **38**

HPLC condition: Column: Phenomenex, Kinetex® 5 $\mu\text{m}$  EVO C18 100 Å, 250 x 4.6 mm LC Column. Solvent A: 0.1%TFA water; Solvent B: 0.1%TFA acetonitrile; Grad/isocrat: 0 to 2 min: isocratic elution at 5% solvent B, 2 to 22 min: 5% to 95% solvent B, 22 to 28 min: isocratic elution at 95% solvent B, 28 to 28.1 min: 95% to 5% solvent B, 28.1 to 30 min: isocratic elution at 5% solvent B. Flow rate: 1 mL/min, column temperature: 19 to 21 °C.

| Run number | RCY(Decay corrected) <b>38</b> |
|------------|--------------------------------|
| Run 1      | 5.5%                           |
| Run 2      | 4.6%                           |
| Run 3      | 5.0%                           |
| Average    | <b>5.0±0.5%</b>                |
| Run4       | 8.4%(from 50min reaction)      |

**Table S53.** Average radiochemical yields for **38**

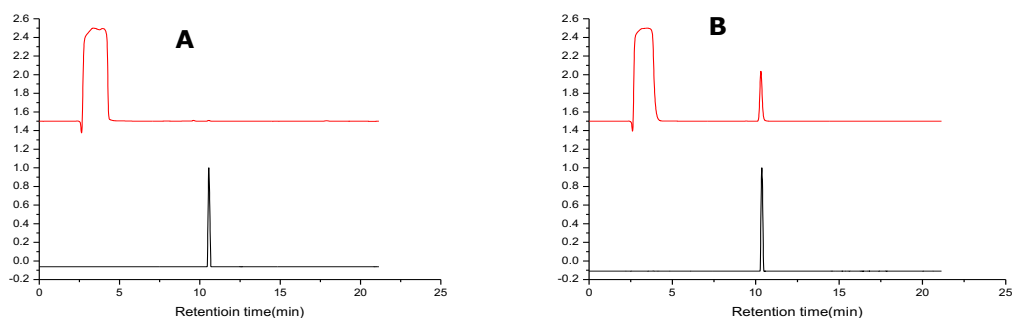

**Fig. S85.** HPLC traces of QC(A) and co-injection(B) for **38**

HPLC condition: Column: Phenomenex, Kinetex® 5µm F5 100 Å, 250 x 4.6 mm LC Column. Solvent A: 0.1%TFA water; Solvent B: 0.1%TFA acetonitrile;isocrat: 0 to 35 min:**50%** solvent B. Flow rate: 1 mL/min, column temperature: 19 to 21 °C.

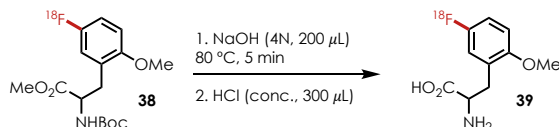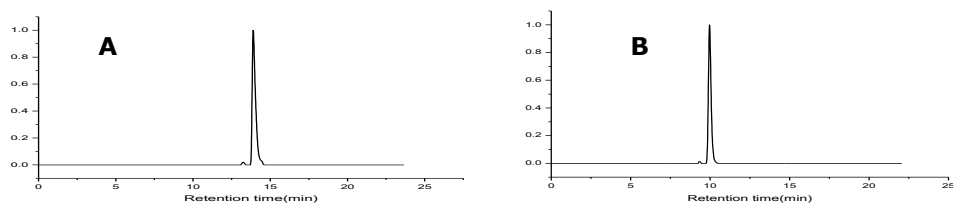

**Fig. S86.** Radio-HPLC traces of **39**

HPLC condition for (A): Column: Phenomenex, Kinetex® 5µm F5 100 Å, 250 x 4.6 mm LC Column. Solvent A: 0.1%TFA water; Solvent B: 0.1%TFA acetonitrile;isocrat: 0 to 35 min:**15%** solvent B. Flow rate: 0.8 mL/min, column temperature: 19 to 21 °C.

HPLC condition for (B): Column: Phenomenex, Kinetex® 5µm F5 100 Å, 250 x 4.6 mm LC Column. Solvent A: 0.1%TFA water; Solvent B: 0.1%TFA acetonitrile;isocrat: 0 to 35 min:**15%** solvent B. Flow rate: 1 mL/min, column temperature: 19 to 21 °C.

| Run number | Deprotection RCY(Decay corrected) <b>39</b> | Actual RCY(Decay corrected) <b>39</b> |
|------------|---------------------------------------------|---------------------------------------|
| Run 1      | 97.6%                                       | 5.4%                                  |
| Run 2      | 96.9%                                       | 4.5%                                  |
| Average    | <b>97.3±0.4%</b>                            | <b>4.9±0.5%</b>                       |

**Table S54.** Average radiochemical yields for **39**

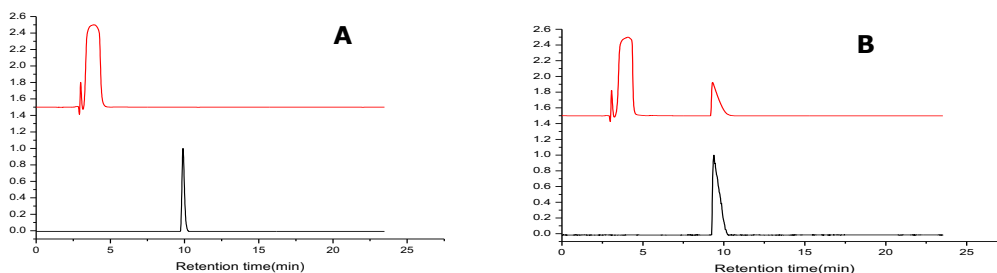

**Fig. S87.** HPLC traces of QC(A) and co-injection(B) for **39**

HPLC condition: Column: Phenomenex, Kinetex® 5µm F5 100 Å, 250 x 4.6 mm LC Column. Solvent A: 0.1%TFA water; Solvent B: 0.1%TFA acetonitrile; isocrat: 0 to 35 min:15% solvent B. Flow rate: 1 mL/min, column temperature: 19 to 21 °C.

### 5.6.5 Synthesis of [<sup>18</sup>F]4-(4'-fluorophenyl)phenylalanine (**41**)

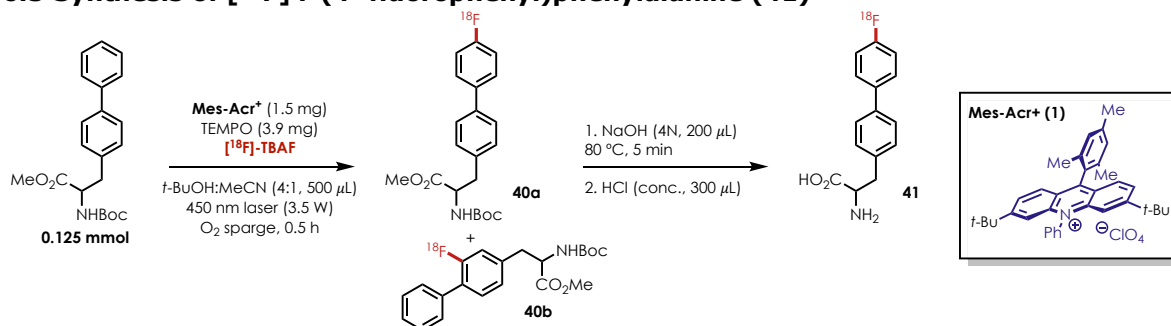

Compounds **40a** and **40b** was obtained using procedure A with 0.125mmol of the nonfluorinated congener (21.5±2% and 11.3±1% (n=3) isolated RCYs respectively). The product **40a** was collected in a 5ml V-Vial without further purification, to which 200µL of 4N NaOH solution was added. The V-vial was sealed with a Teflon-lined septum screw cap equipped with a vent needle. The solution was heated at 80°C with a positive N<sub>2</sub> flow for 5min. The N<sub>2</sub> flow was then stopped and the vent needle removed before 300µL of concentrated HCl was added to quench the reaction. The solution was diluted with DI H<sub>2</sub>O and MeCN before being analyzed and purified on HPLC to obtain [<sup>18</sup>F]4-(4'-fluorophenyl)phenylalanine (**41**) in 20.5% (n=1) RCY. The collected product was then put on the rotary evaporator to remove excess MeCN from the solution. The solution of **41** was then neutralized to pH 7 by adding NaOH (1N) and PBS (10X). **41** was reformulated in a 1X PBS solution for use in PET imaging studies.

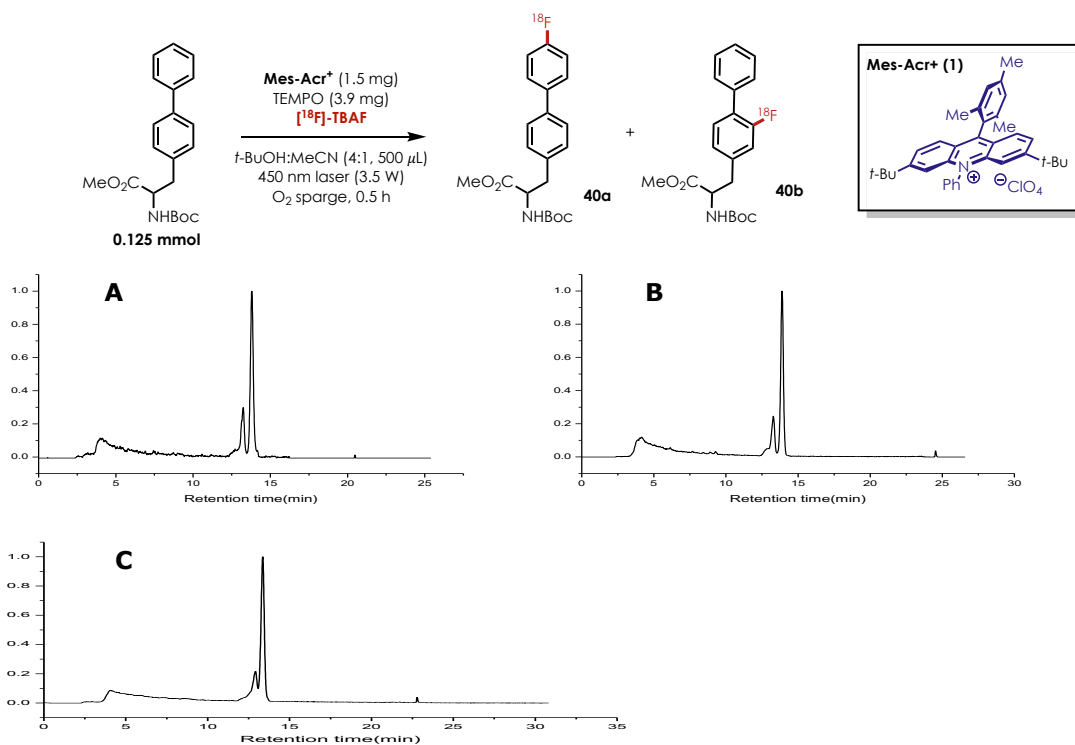

**Fig. S88.** Radio-HPLC traces of **40** (**40a** and **40b**)

HPLC condition: Column: Phenomenex, Kinetex® 5 $\mu$ m F5 100 Å, 250 x 4.6 mm LC Column. Solvent A: 0.1%TFA water; Solvent B: 0.1%TFA acetonitrile;isocrat: 0 to 35 min:55% solvent B. Flow rate: 1 mL/min, column temperature: 19 to 21 °C.

| Run number | RCY(Decay corrected) <b>40a</b> | RCY(Decay corrected) <b>40b</b> |
|------------|---------------------------------|---------------------------------|
| Run 1      | 23.6%                           | 11.5%                           |
| Run 2      | 21.1%                           | 10.0%                           |
| Run 3      | 19.8%                           | 12.3%                           |
| Average    | <b>21.5±2%</b>                  | <b>11.3±1%</b>                  |

**Table S55.** Average radiochemical yields for **40a** and **40b**

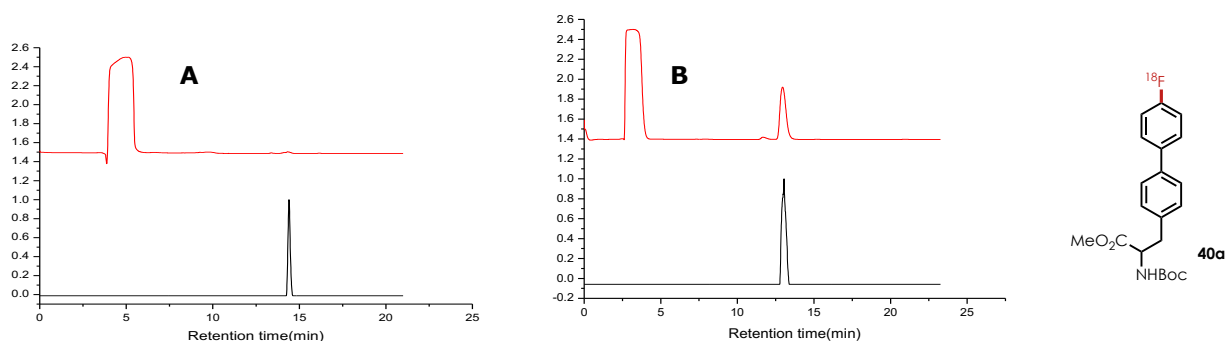

**Fig. S89.** HPLC traces of QC(A) and co-injection(B) for **40a**

HPLC condition for (A): Column: Phenomenex, Kinetex® 5µm F5 100 Å, 250 x 4.6 mm LC Column. Solvent A: 0.1%TFA water; Solvent B: 0.1%TFA acetonitrile; isocrat: 0 to 35 min:55% solvent B. Flow rate: 0.8-1 mL/min, column temperature: 19 to 21 °C.  
HPLC condition for (B): Column: Phenomenex, Kinetex® 5µm F5 100 Å, 250 x 4.6 mm LC Column. Solvent A: 0.1%TFA water; Solvent B: 0.1%TFA acetonitrile; isocrat: 0 to 35 min:55% solvent B. Flow rate: 1 mL/min, column temperature: 19 to 21 °C.

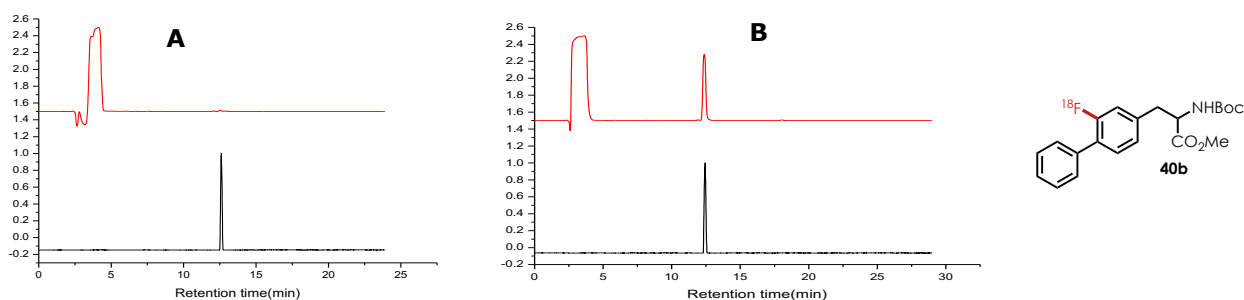

**Fig. S90.** HPLC traces of QC(A) and co-injection(B) for **40b**

HPLC condition: Column: Phenomenex, Kinetex® 5µm F5 100 Å, 250 x 4.6 mm LC Column. Solvent A: 0.1%TFA water; Solvent B: 0.1%TFA acetonitrile; isocrat: 0 to 35 min:55% solvent B. Flow rate: 1 mL/min, column temperature: 19 to 21 °C.

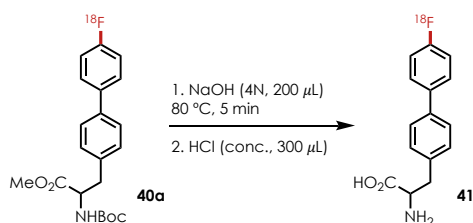

| Run number | Deprotection RCY(Decay corrected) | Actual RCY(Decay corrected) |
|------------|-----------------------------------|-----------------------------|
| Run 1      | 93.2%                             | 20.5%                       |

**Table S56.** Radiochemical yield for **41**

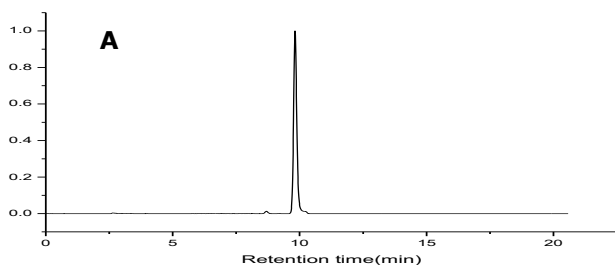

**Fig. S91.** Radio-HPLC trace of **41**

HPLC condition: Column: Phenomenex, Kinetex® 5µm F5 100 Å, 250 x 4.6 mm LC Column. Solvent A: 0.1%TFA water; Solvent B: 0.1%TFA acetonitrile;isocrat: 0 to 35 min:**30%** solvent B. Flow rate: 1 mL/min, column temperature: 19 to 21 °C.

#### 5.6.6 Synthesis of [<sup>18</sup>F]Fenoprofen (**42**):

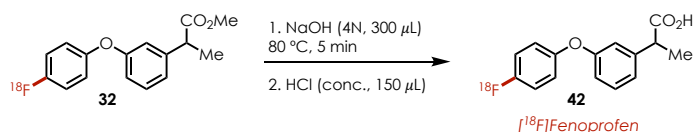

Compound **32** was obtained as detailed in section **5.6.2**. The product **32** was collected in a 5ml V-Vial without further purification, to which 300µL of 4N NaOH solution was added. The V-vial was sealed with a Teflon-lined septum screw cap equipped with a vent needle. The solution was heated at 80°C with a positive N<sub>2</sub> flow for 5min. The N<sub>2</sub> flow was then stopped and the vent needle removed before 150µL of concentrated HCl was added to quench the reaction. The solution was diluted with DI H<sub>2</sub>O and MeCN before being analyzed and purified on HPLC to obtain [<sup>18</sup>F]Fenoprofen (**42**) in 35.8% (n=1) RCY. The collected product was then put on the rotary evaporator to remove excess MeCN from the solution. The solution of **42** was then neutralized to pH 7 by adding NaOH (1N) and PBS (10X). **42** was reformulated in a 1X PBS solution for use in PET imaging studies.

| Run number | Deprotection RCY (Decay corrected) | Actual RCY (Decay corrected) |
|------------|------------------------------------|------------------------------|
| Run 1      | 93.1%                              | 35.8%                        |

**Table S57.** Radiochemical yield for **42**

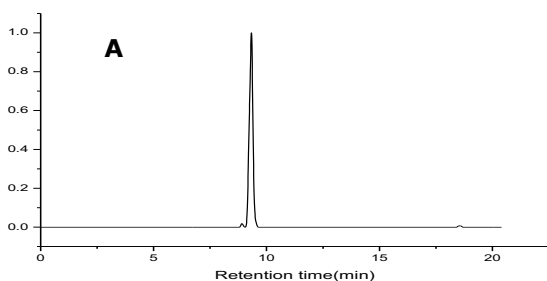

**Fig. S92.** Radio-HPLC trace of **42**

HPLC condition: Column: Phenomenex, Kinetex® 5µm F5 100 Å, 250 x 4.6 mm LC Column. Solvent A: 0.1%TFA water; Solvent B: 0.1%TFA acetonitrile;isocrat: 0 to 35 min:**50%** solvent B. Flow rate: 1 mL/min, column temperature: 19 to 21 °C.

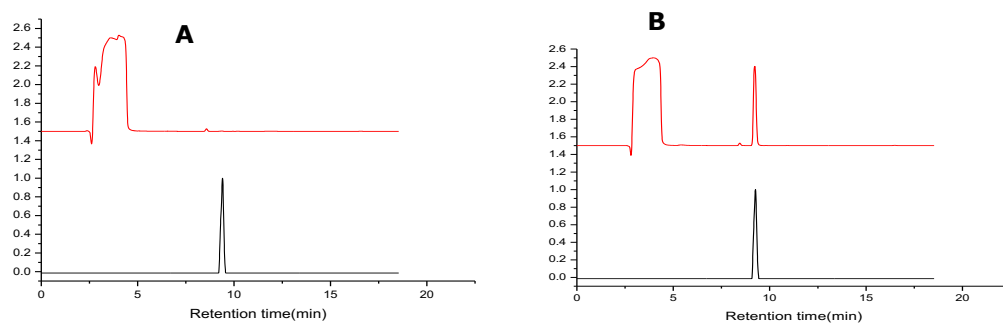

**Fig. S93.** HPLC traces of QC(A) and co-injection(B) for **42**

HPLC condition: Column: Phenomenex, Kinetex® 5 $\mu$ m F5 100 Å, 250 x 4.6 mm LC Column. Solvent A: 0.1%TFA water; Solvent B: 0.1%TFA acetonitrile; isocrat: 0 to 35 min:50% solvent B. Flow rate: 1 mL/min, column temperature: 19 to 21 °C.

## 6. Positron Emission Tomography (PET) and Computed Tomography (CT) Imaging Studies

### 6.1 *Ex vivo* PET/CT Imaging of Mouse Ear Inflammation Models

#### Materials and Methods

All animal studies conformed to protocol approved by the University of North Carolina Institutional Animal Care and Use Committee. Female 10-12-week-old nude mice (Division of Comparative Medicine, University of North Carolina at Chapel Hill) were housed at constant temperature (23°C) and relative humidity (60%) with a fixed 12 h light: 12 h dark cycle and had free access to food and water. Acute inflammation was induced by topical application of 10  $\mu$ L 12-*o*-tetradecanoylphorbol-13-acetate (TPA) acetone solution (125 $\mu$ g/ml) to the inner and outer surface of the right ear of each mouse as previously described (79, 80). Six hours after TPA exposure, mice received an intravenous bolus injection of [ $^{18}$ F]Fenoprofen (~5.8 MBq). At 1 h post-injection (p.i.), the animals were euthanized and the ears were harvested and subjected to a 10-min static PET scan (SuperArgus 4R, SEDECAL, Madrid, Spain). After PET scans, the ears were wet-weighted and counted in a gamma counter. The percentage-injected dose per gram (% ID/g) was determined and the results were reported as mean  $\pm$  SD. To investigate the pharmacokinetics of [ $^{18}$ F]Fenoprofen, dynamic PET acquisitions was started and [ $^{18}$ F]Fenoprofen was administered in a rapid bolus through the tail vein catheter. Thirty minutes of dynamic PET data were acquired following [ $^{18}$ F]Fenoprofen administration. Dynamic PET data were binned into 14 frames (3 $\times$ 20s, 4 $\times$ 60s, 4 $\times$ 120s, 3 $\times$ 300s) and frames were reconstructed using non-scatter-corrected 3D ordered-subset expectation maximization (OSEM3D). Static PET data were reconstruction into a single frame by OSEM 3D.

#### Results of Inflammation Experiments

Rapid [ $^{18}$ F]Fenoprofen accumulation in the heart and liver were observed in nude mouse (N=1) following a rapid intravenous bolus injection. PET time-activity curve (TAC) is shown in **Fig. S94-G**, and tabulated data is listed in table. Following initial distribution (<1 min), uptake was observed to be stable over 30 minutes of PET imaging. Six hours after TPA application, the treated ears exhibited edema. Accumulation of [ $^{18}$ F]Fenoprofen in TPA-treated ear and normal ear was measured using PET imaging. Quantitative analysis showed significant higher uptake of [ $^{18}$ F]Fenoprofen in TPA-treated inflamed ear ( $1.48 \pm 0.57$ , N=3) as compared with normal ear ( $0.64 \pm 0.10$ , N=4) ( $P < 0.05$ ). *Ex vivo* gamma counting validated PET quantification result, with ( $4.82 \pm 0.58$ ) % ID/g (N=4) in TPA treated ear and ( $3.08 \pm 1.03$ ) % ID/g (N=12) in normal ear, respectively ( $p < 0.05$ ). The relatively higher value obtained from gamma counting is probably due to the thin thickness of ear, which make positron annihilation less efficient. The coronal slices, maximum intensity projection (MIP) static PET image, and CT image of a representative TPA-treated ear (**S94-A**, **S94-C** and **S94-E**) or normal ear (**S94-B**, **S94-D** and **S94-F**) were shown in **Fig. S94**.

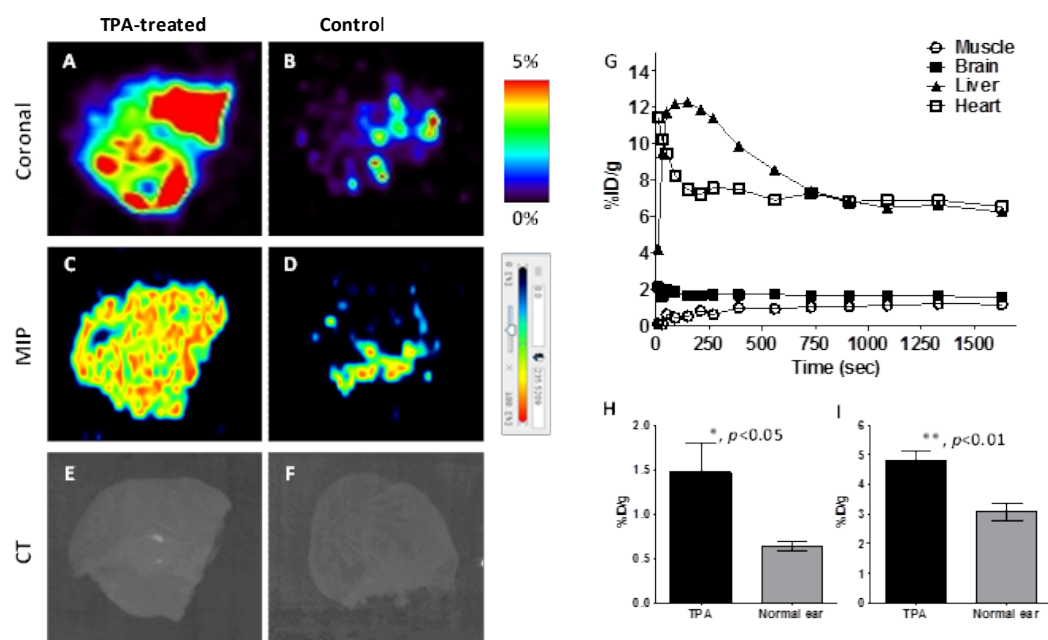

**Fig. S94:** *Ex vivo* [ $^{18}\text{F}$ ]Fenoprofen PET imaging. Coronal slice, maximum intensity projection (MIP) static PET image, and CT image of representative TPA-treated ear (A, C and E) or normal ear (B, D and F) harvested from the mice injected intravenously with [ $^{18}\text{F}$ ]Fenoprofen. (G) Dynamic PET time-activity curve (tac) of organ ROIs in nude mice injected with a rapid intravenous bolus of [ $^{18}\text{F}$ ]Fenoprofen, imaged for 30 minutes post-injection. (H) Uptake of [ $^{18}\text{F}$ ]Fenoprofen in TPA-treated or normal ear measured by ROIs hand-drawn on static *ex vivo* PET images. (I) Uptake of [ $^{18}\text{F}$ ]Fenoprofen in TPA-treated or normal ear measured by gamma counting.

| Sample          | N  | %ID/g(mean $\pm$ SD) |
|-----------------|----|----------------------|
| TPA treated ear | 4  | 4.82 $\pm$ 0.58      |
| Normal ear      | 12 | 3.08 $\pm$ 1.3       |

**Table S58.** [ $^{18}\text{F}$ ]Fenoprofen uptake in TPA-treated ear and normal ear, quantified by *ex vivo* gamma counting.

## 6.2 *In vivo* PET/CT Imaging of Mouse Tumor Models

### Materials and Methods

All animal studies conformed to protocol approved by the University of North Carolina Institutional Animal Care and Use Committee. Human breast cancer cell line MCF-7 and human glioblastoma cell line U87MG were obtained from American Type Culture (Manassas, VA, USA) and cultured in Eagle's Minimum Essential Medium (EMEM) (Gibco, Grand Island, NY, USA) supplemented with 10% fetal bovine serum (FBS) (Omega Scientific, Tarzana, CA, USA) at 37°C in an atmosphere containing 5% CO<sub>2</sub>. Tumor model was established in 4- to 6- week old female nude mice (Division of Comparative Medicine, the University of North Carolina at Chapel Hill). For U87MG tumor model, the tumor cells were suspended in PBS (2 $\times$  10<sup>7</sup>/ml) and mixed with 1:1 Matrigel (v:v). Then a 100  $\mu\text{L}$  cell suspension was inoculated subcutaneously at the flank. For MCF-7 tumor model, a slow-release 17- $\beta$ -estradiol (7.5 mg/pellet, 60-day slow release; 125  $\mu\text{g/day}$ ) was implanted. In brief, the mouse was anesthetized under 2% isoflurane. The skin on the lateral side of the neck of the mouse was lifted, then a 3-5 mm incision was made. With a pair of forceps, a small pocket beyond the incision site was

created, and the pellet was introduced. The incision site was closed with a 5-0 silk suture. Four days later, MCF-7 cells were harvested, resuspended in PBS ( $2 \times 10^7$ /ml) and mixed 1:1 Matrigel (v:v). Then a 100  $\mu$ L cell suspension was inoculated subcutaneously at the flank.

### Results of *in vivo* PET/CT Imaging (MCF7 and U87MG Tumors)

The MCF7 or U87MG tumor bearing mice received an intravenous injection of  $^{18}\text{F}$ -PET agents (-5.5 MBq). At 1 h, 3 h and 4.5 h post-injection (p.i.), the animals were anesthetized under 2% isoflurane and subjected to 10-min static PET scan (SuperArgus 4R, SEDECAL, Madrid, Spain). The percentage-injected dose per gram (% ID/g) of major organs were calculated and reported as mean  $\pm$  SD. PET data were reconstruction into a single frame by OSEM 3D.

$^{18}\text{F}$ 4-(4'-fluoro-phenyl)phenylalanine (**41**) showed relatively high background level in MCF7 tumor models at all time points (**Fig. S95**). The tumor uptake of **41** was  $4.11 \pm 0.36$  %ID/g,  $3.69 \pm 0.66$  %ID/g and  $3.19 \pm 0.64$  %ID/g at 1 h, 3 h and 4.5 h respectively post-injection (p.i.).  $^{18}\text{F}$ 2-Methoxy-5-fluoro-phenylalanine (**39**) had tumor uptake of  $8.24 \pm 0.90$  %ID/g,  $5.94 \pm 1.34$  %ID/g and  $4.13 \pm 1.88$  %ID/g at 1 h, 3 h and 4.5 h respectively post-injection (p.i.). High liver uptake was observed for **41** with tumor to liver uptake ratio of  $0.36 \pm 0.01$ ,  $0.45 \pm 0.02$  and  $0.55 \pm 0.01$  at 1 h, 3 h and 4.5 h. **39** displayed significantly lower tumor to liver uptake ratio [ $3.63 \pm 0.29$ ,  $4.88 \pm 0.45$  and  $4.06 \pm 0.65$  at the respective time points]. **39** also demonstrated prominent uptake in the U87MG xenografts. The tumor uptake was  $5.64 \pm 0.60$  %ID/g,  $4.64 \pm 0.47$  %ID/g and  $2.93 \pm 1.07$  %ID/g at 1 h, 3 h and 4.5 h respectively p.i. The coronal slices of static PET images are shown in **Fig. S95**.

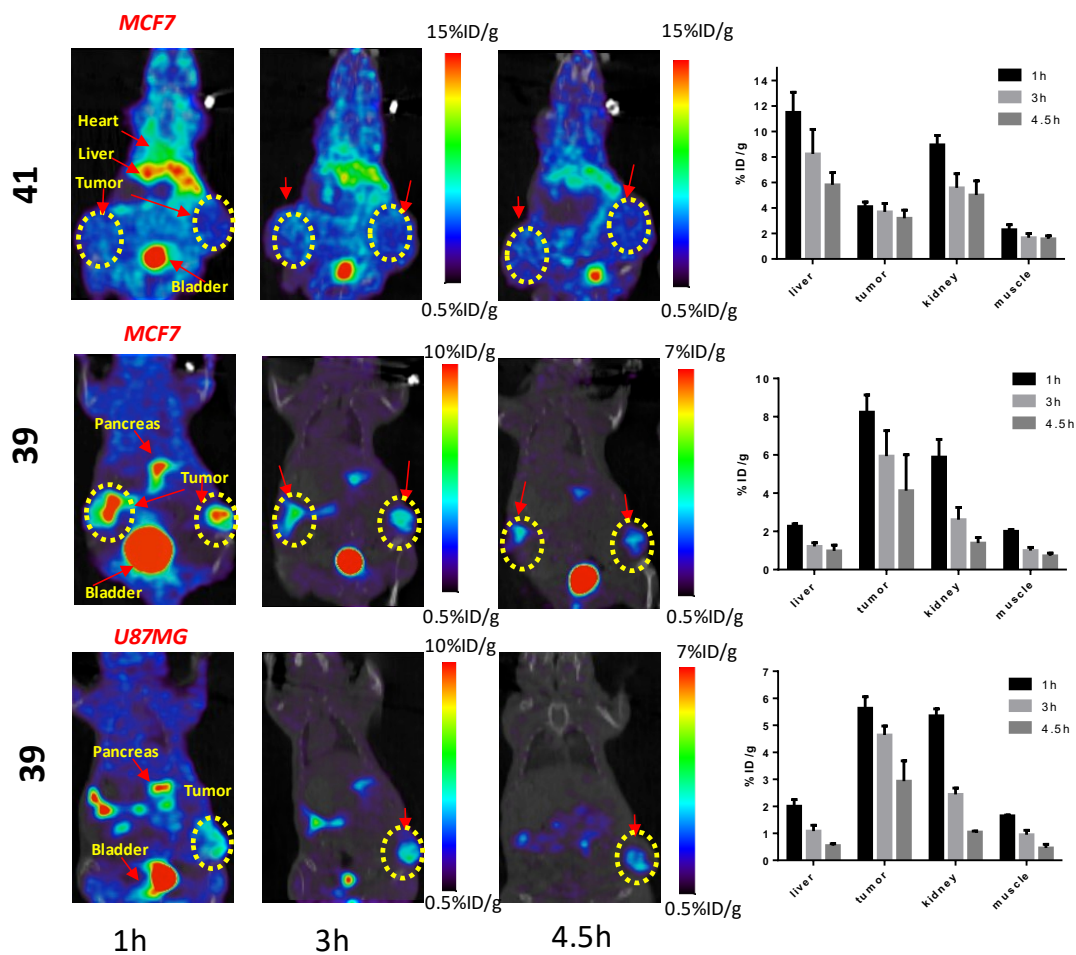

**Fig. S95** Representative PET/CT images of MCF7 model at 1, 3 and 4.5h post injection of **41** and the quantitative uptake of major organs derived from PET images (first panel), MCF7 model after injection of **39** (second panel) and U87MG model after injection of **39** (third panel).

## 7. Mechanism Proposal and Computational Data

All computations were carried out in the Gaussian 09 program suite (81) at the B3LYP/6-31G+(d,p) level of theory. Natural population analyses (NPA atomic charges and molecular orbital populations) were performed using the NBO formalism and the NPA values were calculated in 1,2-dichloroethane according to a prior procedure from our laboratory (25).

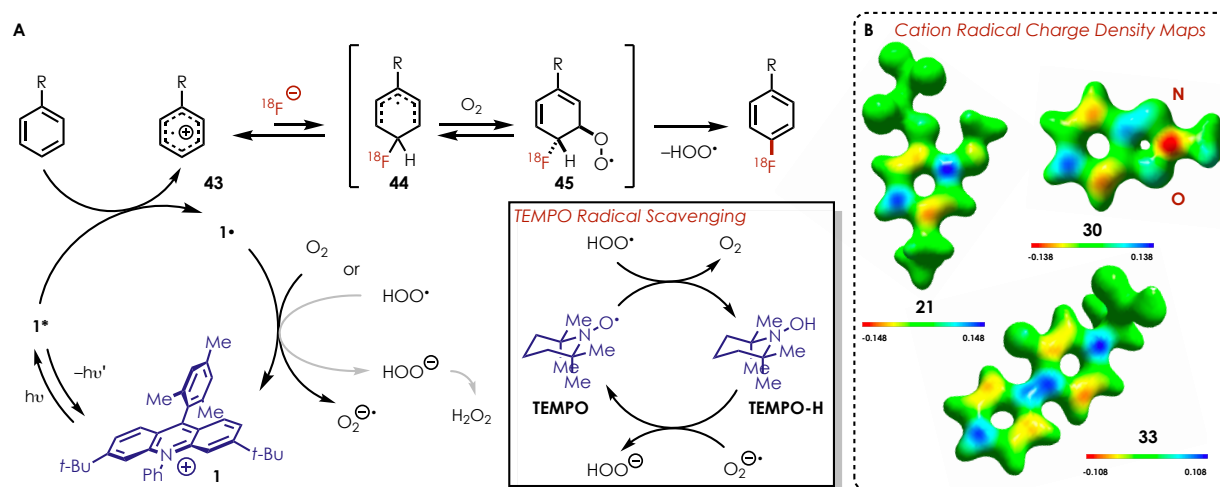

**Fig. S96.** (A) Mechanistic Proposal for Oxidative C-H  $^{18}\text{F}$ -Fluorination of Aromatics. (B) LUMO charge density maps calculated at the B3LYP/6-31G+(d,p) level correspond to the cation radicals of the starting arenes for **21**, **30** and **33**. The darkest blue carbon atoms on the arenes indicate the most likely reactivity sites (See figs. S100 and S101 for more details).

### I. 2-substituted methoxyarenes

| Arene | Ground state | Radical cation | Difference |
|-------|--------------|----------------|------------|
|       | 1. -1.174    | 1. -1.008      | 1. 0.166   |
|       | 2. 0.507     | 2. 0.507       | 2. -0.379  |
|       | 3. -0.301    | 3. -0.248      | 3. 0.053   |
|       | 4. -0.025    | 4. 0.067       | 4. 0.092   |
|       | 5. -0.598    | 5. -0.598      | 5. 0.436   |
|       | 6. 1.116     | 6. 1.116       | 6. 0.342   |
| Arene | Ground state | Radical cation | Difference |
|       | 1. -1.008    | 1. -0.595      | 1. 0.413   |
|       | 2. 0.416     | 2. 0.564       | 2. -0.148  |
|       | 3. -0.292    | 3. -0.396      | 3. -0.204  |
|       | 4. -0.053    | 4. 0.137       | 4. 0.190   |
|       | 5. -0.922    | 5. -0.654      | 5. 0.268   |
|       | 6. 1.365     | 6. 0.693       | 6. -0.672  |
| Arene | Ground state | Radical cation | Difference |
|       | 1. -0.853    | 1. -0.491      | 1. 0.362   |
|       | 2. 0.440     | 2. 0.705       | 2. 0.265   |
|       | 3. -0.309    | 3. -0.461      | 3. -0.152  |
|       | 4. 0.050     | 4. 0.264       | 4. 0.214   |
|       | 5. -1.145    | 5. -1.384      | 5. -0.239  |
|       | 6. 1.490     | 6. 1.351       | 6. -0.139  |

**Fig. S97.** Natural population analyses for the ground state and radical cation of selected 2-substituted methoxyarenes

**II. 4-substituted methoxyarenes**

| Arene                                                                              | Ground state | Radical cation | Difference |
|------------------------------------------------------------------------------------|--------------|----------------|------------|
| 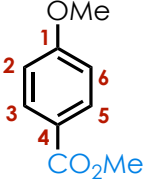  | 1. -0.356    | 1. -0.446      | 1. -0.090  |
|                                                                                    | 2. 0.580     | 2. 0.720       | 2. 0.140   |
|                                                                                    | 3. -0.501    | 3. -0.583      | 3. -0.082  |
|                                                                                    | 4. -0.019    | 4. 0.264       | 4. 0.283   |
|                                                                                    | 5. -0.359    | 5. -0.341      | 5. 0.018   |
|                                                                                    | 6. 0.021     | 6. 0.142       | 6. 0.121   |
| Arene                                                                              | Ground state | Radical cation | Difference |
| 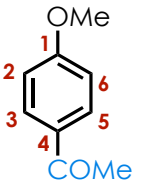  | 1. -0.371    | 1. -0.452      | 1. -0.081  |
|                                                                                    | 2. 0.566     | 2. 0.772       | 2. 0.206   |
|                                                                                    | 3. -1.584    | 3. -1.553      | 3. 0.031   |
|                                                                                    | 4. 0.794     | 4. 0.849       | 4. 0.055   |
|                                                                                    | 5. 0.191     | 5. 0.227       | 5. 0.036   |
|                                                                                    | 6. -0.024    | 6. 0.099       | 6. 0.123   |
| Arene                                                                              | Ground state | Radical cation | Difference |
| 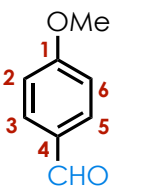 | 1. -0.349    | 1. -0.433      | 1. -0.084  |
|                                                                                    | 2. 0.792     | 2. 0.956       | 2. 0.164   |
|                                                                                    | 3. -1.368    | 3. -1.425      | 3. -0.057  |
|                                                                                    | 4. 0.560     | 4. 0.659       | 4. 0.099   |
|                                                                                    | 5. 0.126     | 5. 0.200       | 5. 0.074   |
|                                                                                    | 6. -0.036    | 6. 0.090       | 6. 0.126   |

**Fig. S98.** Natural population analyses for the ground state and radical cation of selected 4-substituted methoxyarenes

| Arene                                                                               | Ground state | Radical cation | Difference |
|-------------------------------------------------------------------------------------|--------------|----------------|------------|
| 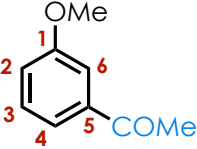 | 1. -0.344    | 1. -0.477      | 1. -0.133  |
|                                                                                     | 2. 0.534     | 2. 0.682       | 2. 0.139   |
|                                                                                     | 3. -0.706    | 3. -0.661      | 3. 0.045   |
|                                                                                     | 4. -0.887    | 4. -0.760      | 4. 0.127   |
|                                                                                     | 5. 0.562     | 5. 0.513       | 5. -0.049  |
|                                                                                     | 6. 0.405     | 6. 0.651       | 6. 0.246   |

**Fig. S99.** Natural population analysis for the ground state and radical cation of 3-methoxyacetophenone

| Arene                                                                                   | Ground state | Radical cation | Difference |
|-----------------------------------------------------------------------------------------|--------------|----------------|------------|
| 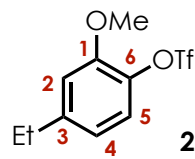<br>21 | 1. -0.571    | 1. -0.451      | 1. 0.080   |
|                                                                                         | 2. 0.192     | 2. -0.372      | 2. -0.564  |
|                                                                                         | 3. 0.324     | 3. 0.155       | 3. -0.169  |
|                                                                                         | 4. -0.772    | 4. -0.594      | 4. 0.178   |
|                                                                                         | 5. 0.674     | 5. 0.598       | 5. -0.076  |
|                                                                                         | 6. -0.092    | 6. 0.589       | 6. 0.687   |

| Arene                                                                                   | Ground state | Radical cation | Difference |
|-----------------------------------------------------------------------------------------|--------------|----------------|------------|
| 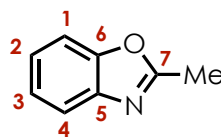<br>30 | 1. -0.626    | 1. -0.594      | 1. 0.032   |
|                                                                                         | 2. -0.244    | 2. -0.083      | 2. 0.161   |
|                                                                                         | 3. -0.197    | 3. -0.184      | 3. 0.013   |
|                                                                                         | 4. -0.872    | 4. -0.627      | 4. 0.245   |
|                                                                                         | 5. 0.759     | 5. 0.638       | 5. -0.121  |
|                                                                                         | 6. 0.505     | 6. 0.685       | 6. 0.180   |
|                                                                                         | 7. 0.611     | 7. 0.437       | 7. -0.174  |

| Arene                                                                                    | Ground state | Radical cation | Difference |
|------------------------------------------------------------------------------------------|--------------|----------------|------------|
| 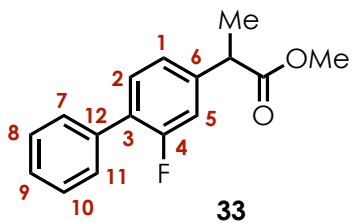<br>33 | 1. -0.333    | 1. -0.475      | 1. -0.142  |
|                                                                                          | 2. -0.264    | 2. -0.176      | 2. 0.088   |
|                                                                                          | 3. 0.538     | 3. 0.077       | 3. -0.461  |
|                                                                                          | 4. -0.270    | 4. 0.114       | 4. 0.384   |
|                                                                                          | 5. -0.259    | 5. -0.328      | 5. -0.069  |
|                                                                                          | 6. 0.009     | 6. 0.097       | 6. 0.088   |
|                                                                                          | 7. -0.393    | 7. -0.263      | 7. 0.130   |
|                                                                                          | 8. -0.171    | 8. -0.365      | 8. -0.194  |
|                                                                                          | 9. -0.178    | 9. -0.084      | 9. 0.094   |
|                                                                                          | 10. -0.035   | 10. -0.368     | 10. -0.333 |
|                                                                                          | 11. -0.064   | 11. -0.018     | 11. 0.046  |
|                                                                                          | 12. 0.453    | 12. 1.359      | 12. 0.906  |

**Fig. S100.** Natural population analyses for the ground state and radical cation of methoxyarenes listed in Fig. S96 (**21**, **30**, **33**)

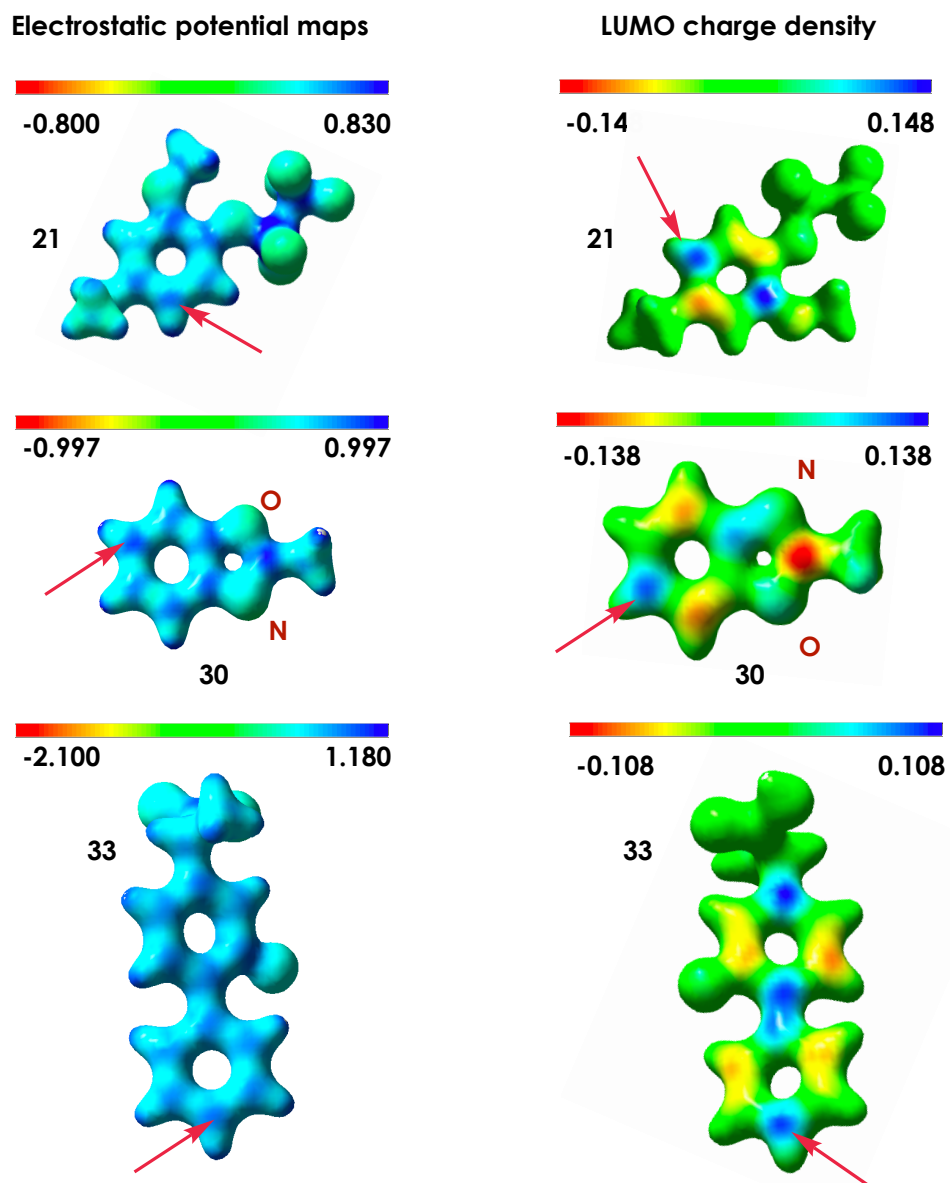

**Fig. S101.** A comparison of electrostatic potentials (left) and LUMO charge density (right) maps for the methoxyarenes listed in Fig. S96. Red arrows indicate the reactive arene C-H site (**21**, **30**, **33**)

8. Spectra data for new compounds ( $^1\text{H}$  NMR,  $^{13}\text{C}$  NMR, and  $^{19}\text{F}$  NMR; IR)

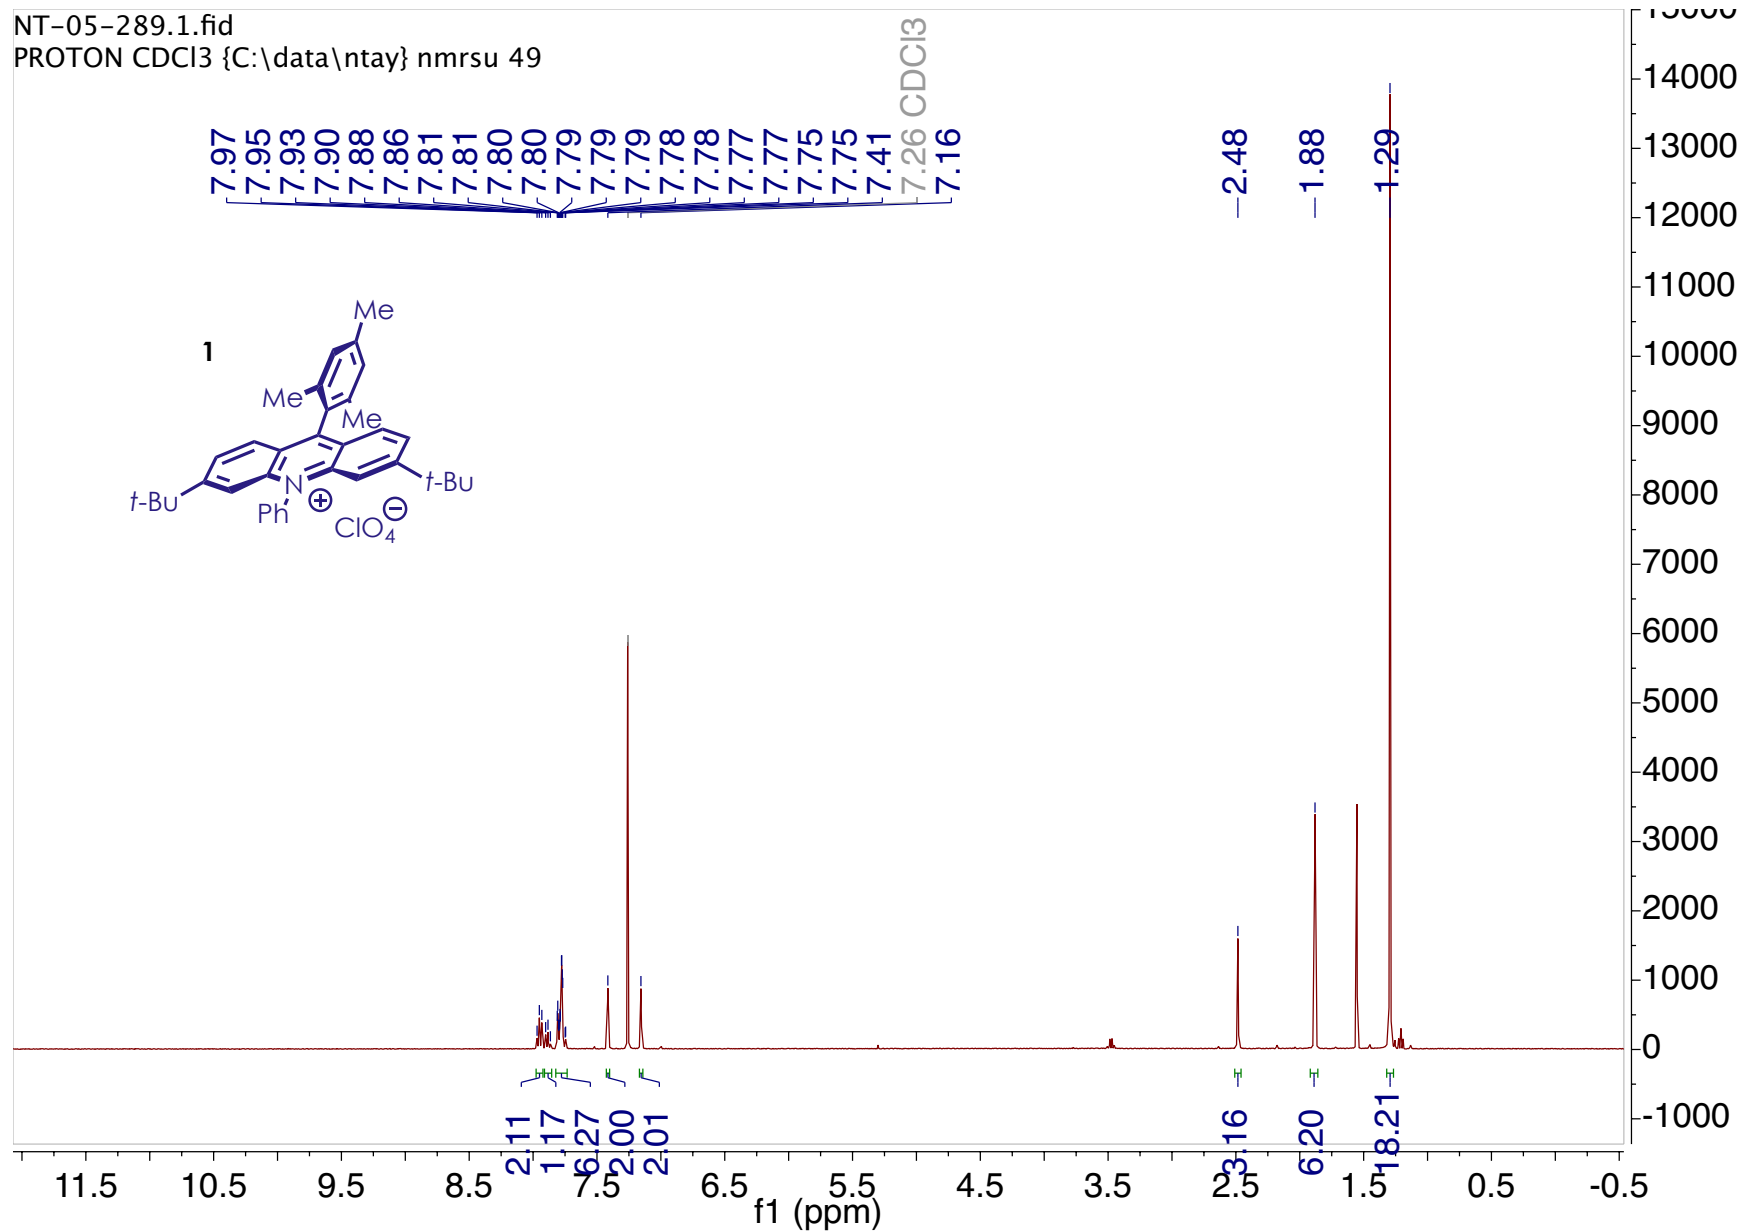

NT-05-289.2.fid

Nick Tay

NT-05-289

$^{13}\text{C}\{^1\text{H}\}$

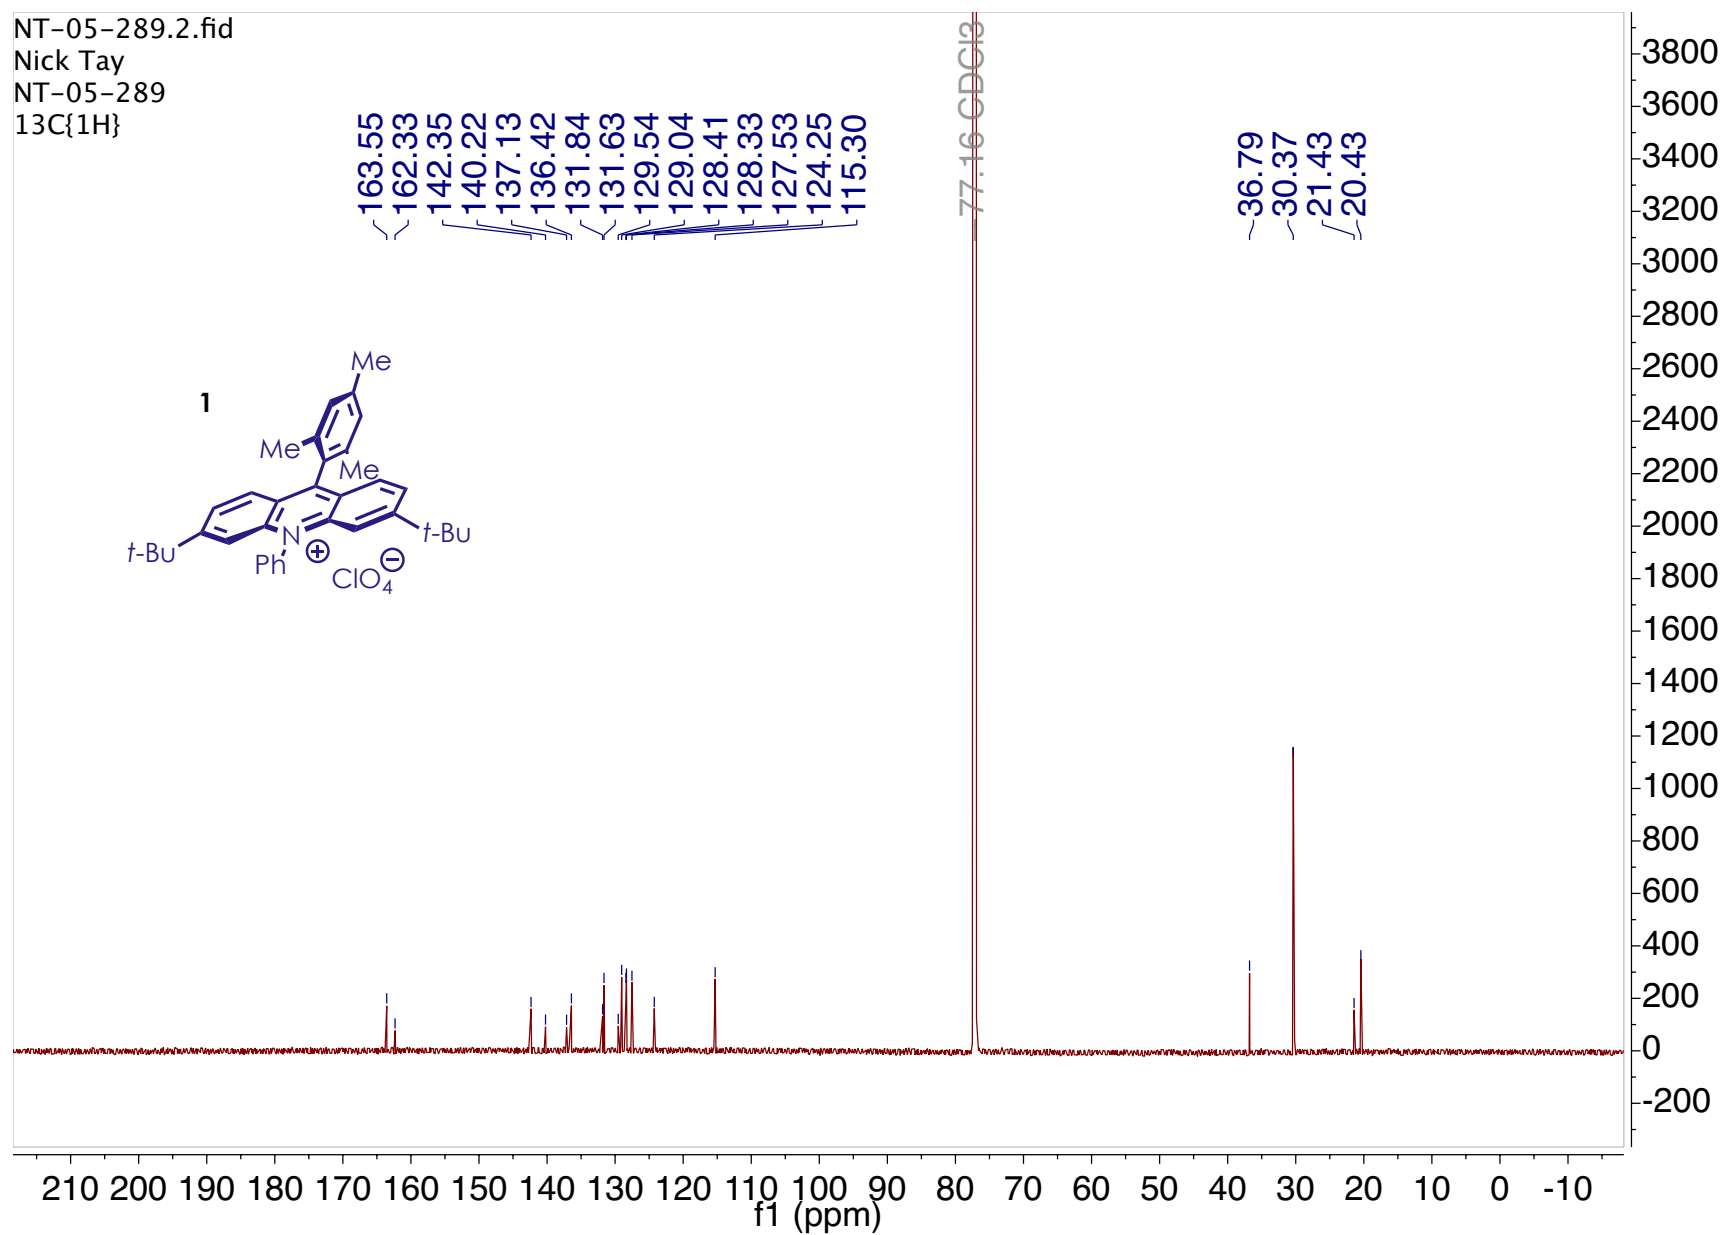

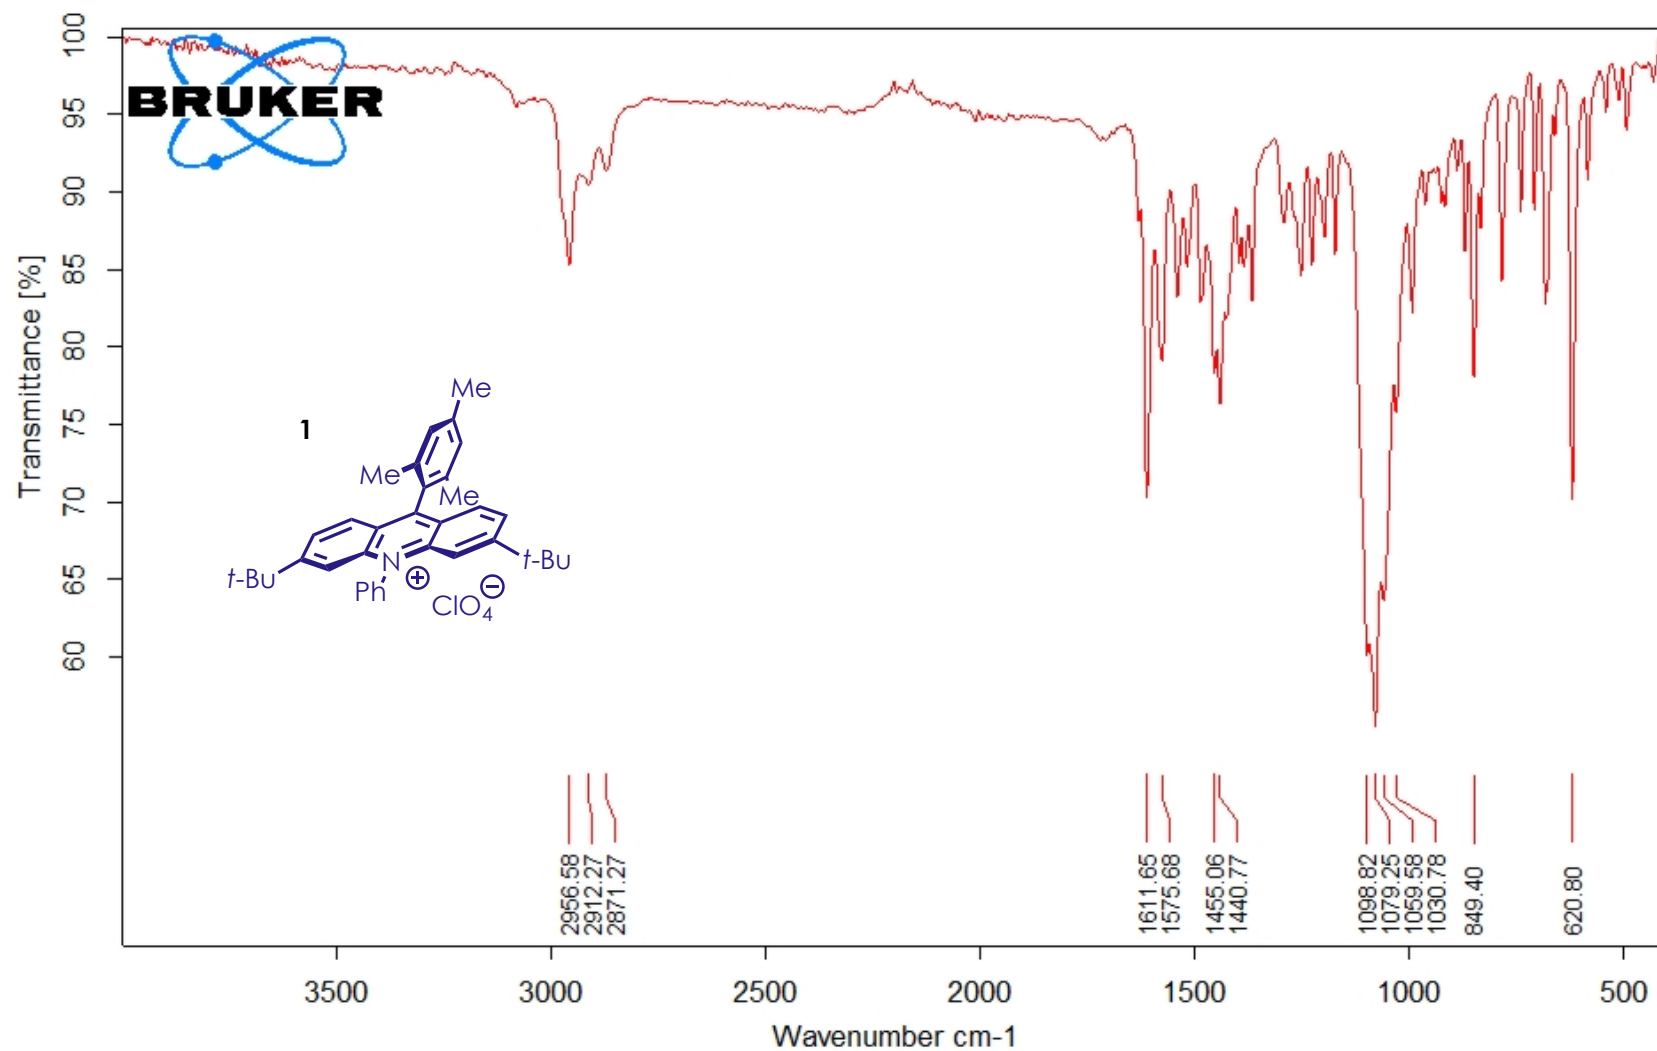

C:\OPUS\_7.2.139.1294\MEAS\NT-5-289.0

NT-5-289

Instrument type and / or accessory

7/30/2018

NT-WC-2.1.fid

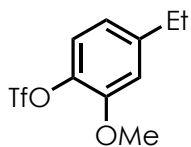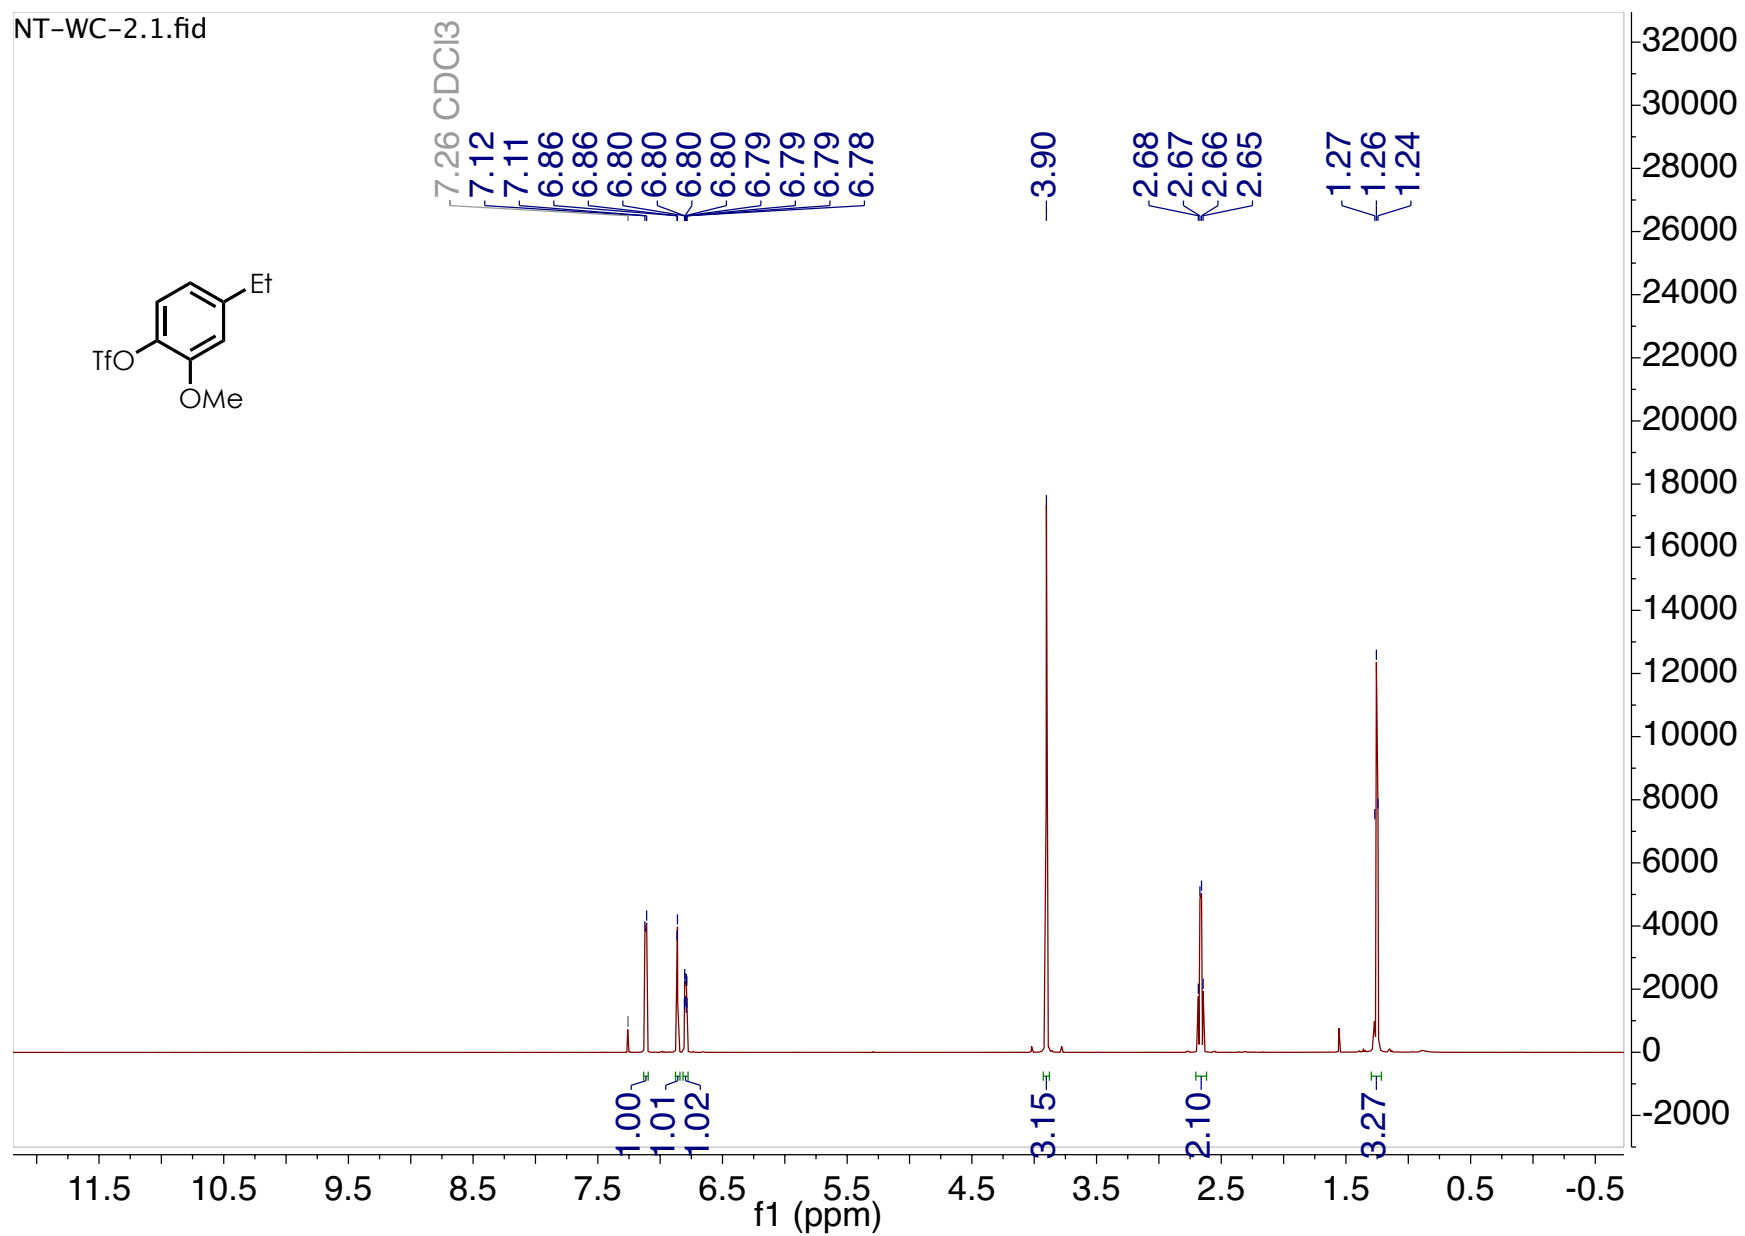

NT-WC-2-13C.1.fid

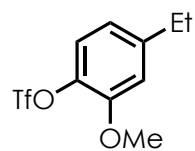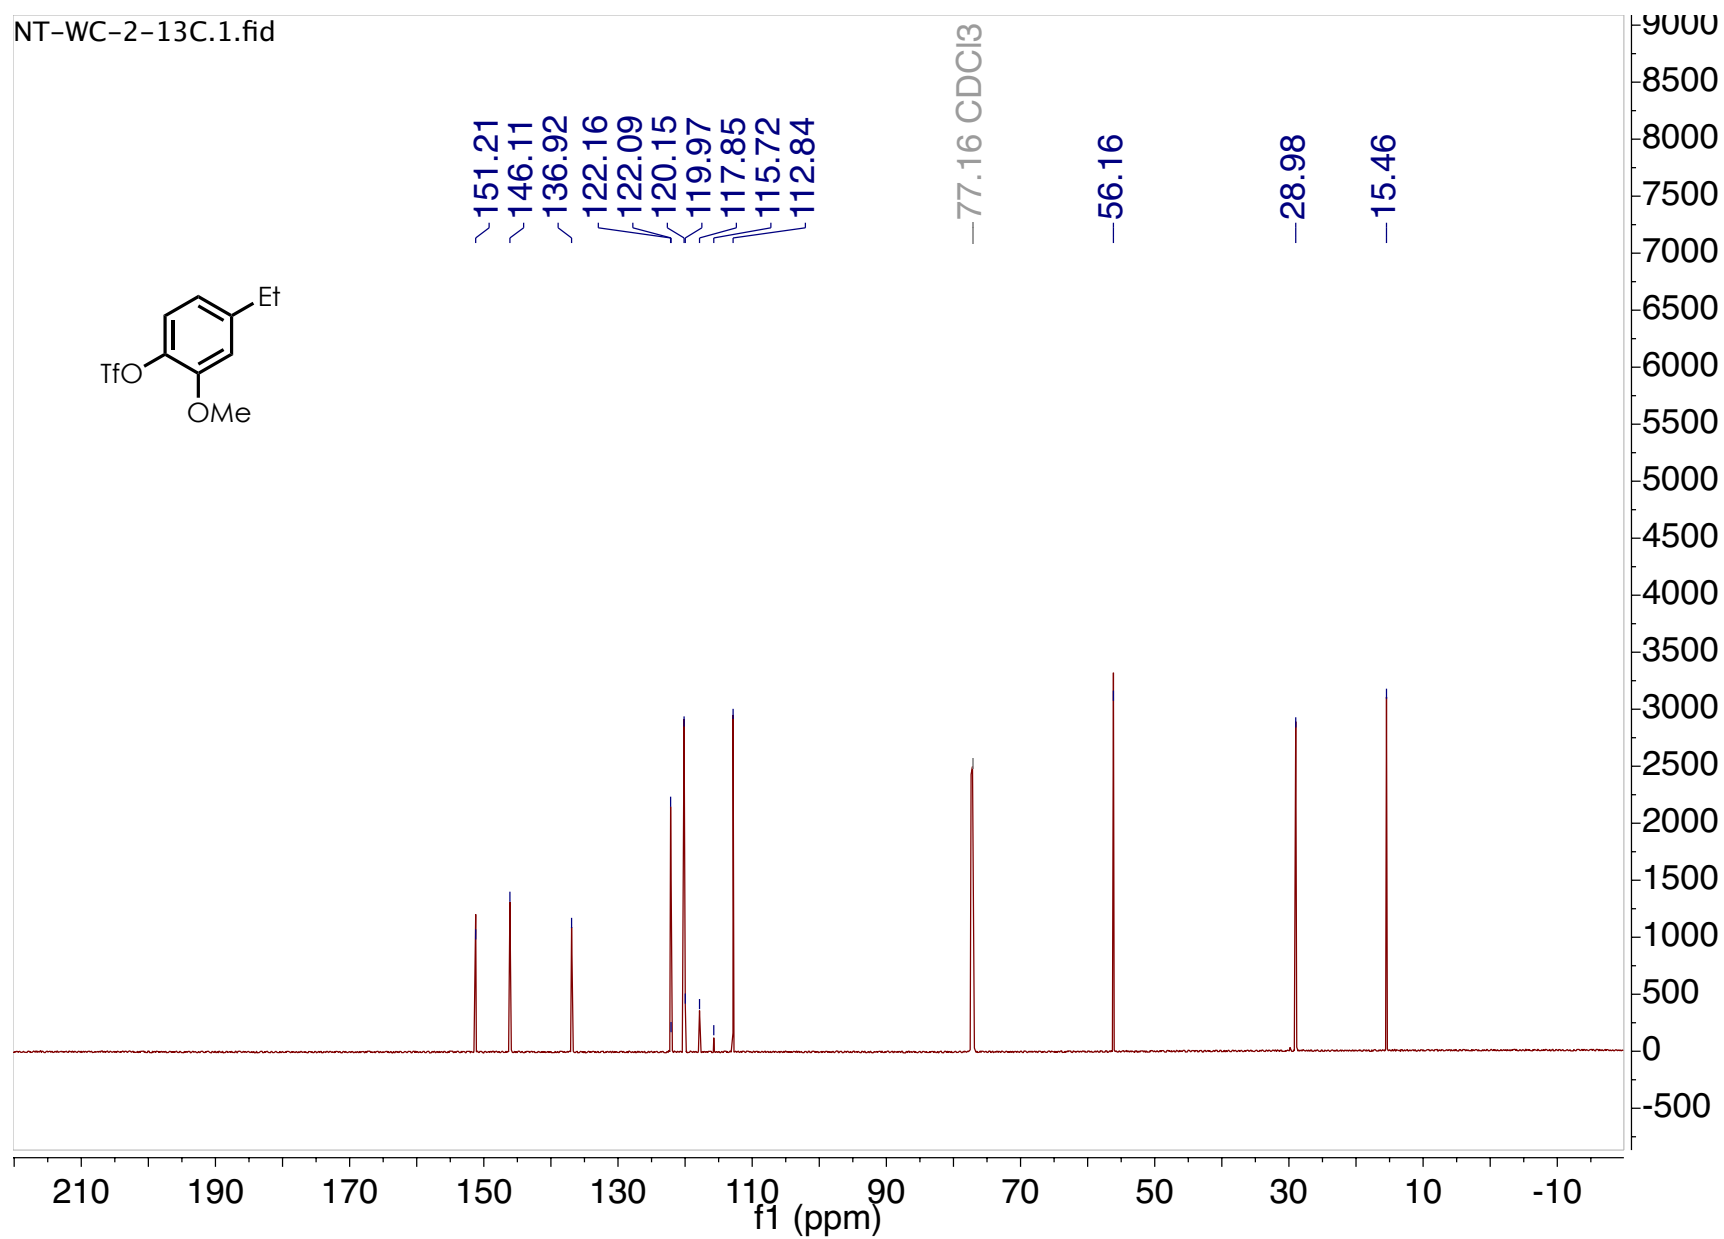

NT-05-288.1.fid  
Nicewicz  
C3308  
ntay  
NT-05-288

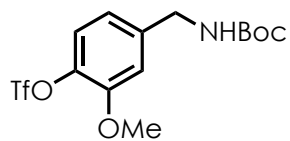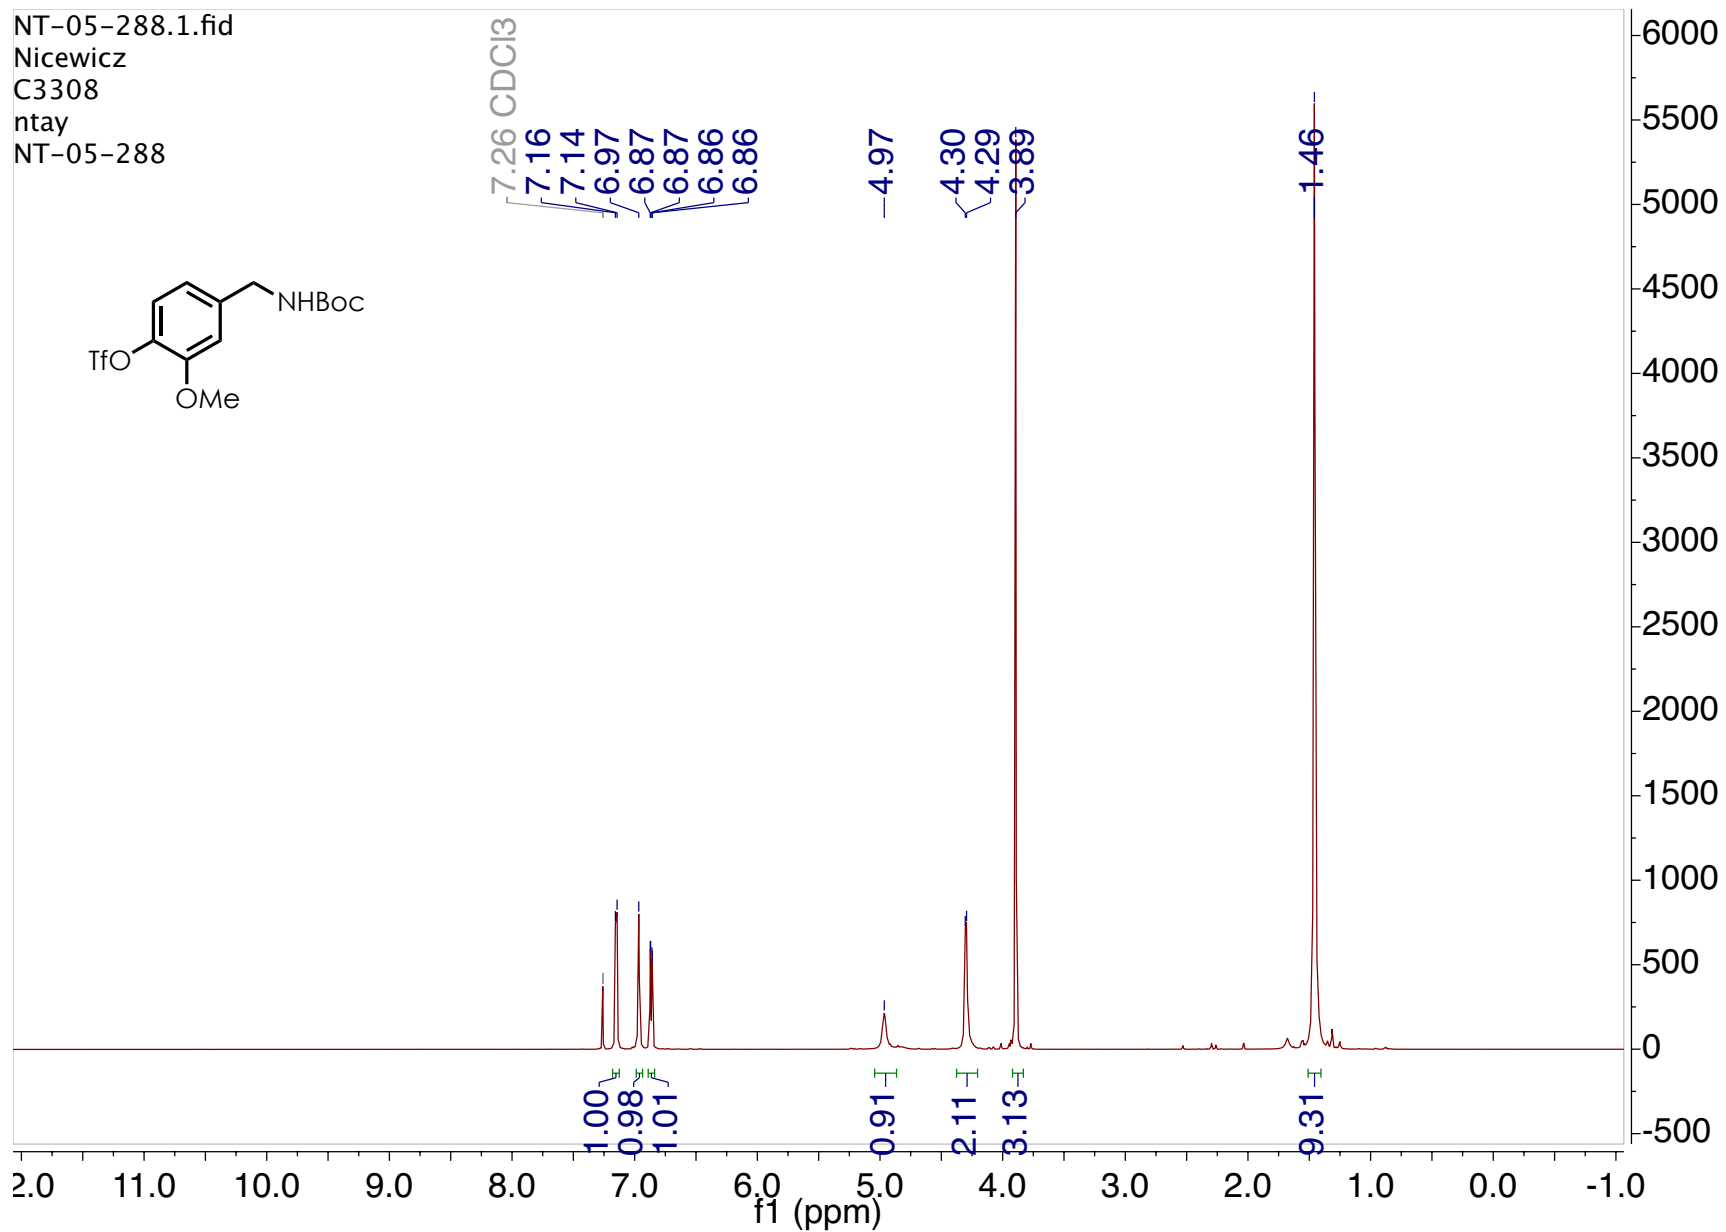

NT-05-288 2.2.fid

Nicewicz

C3308

ntay

NT-05-288

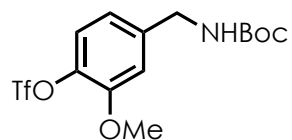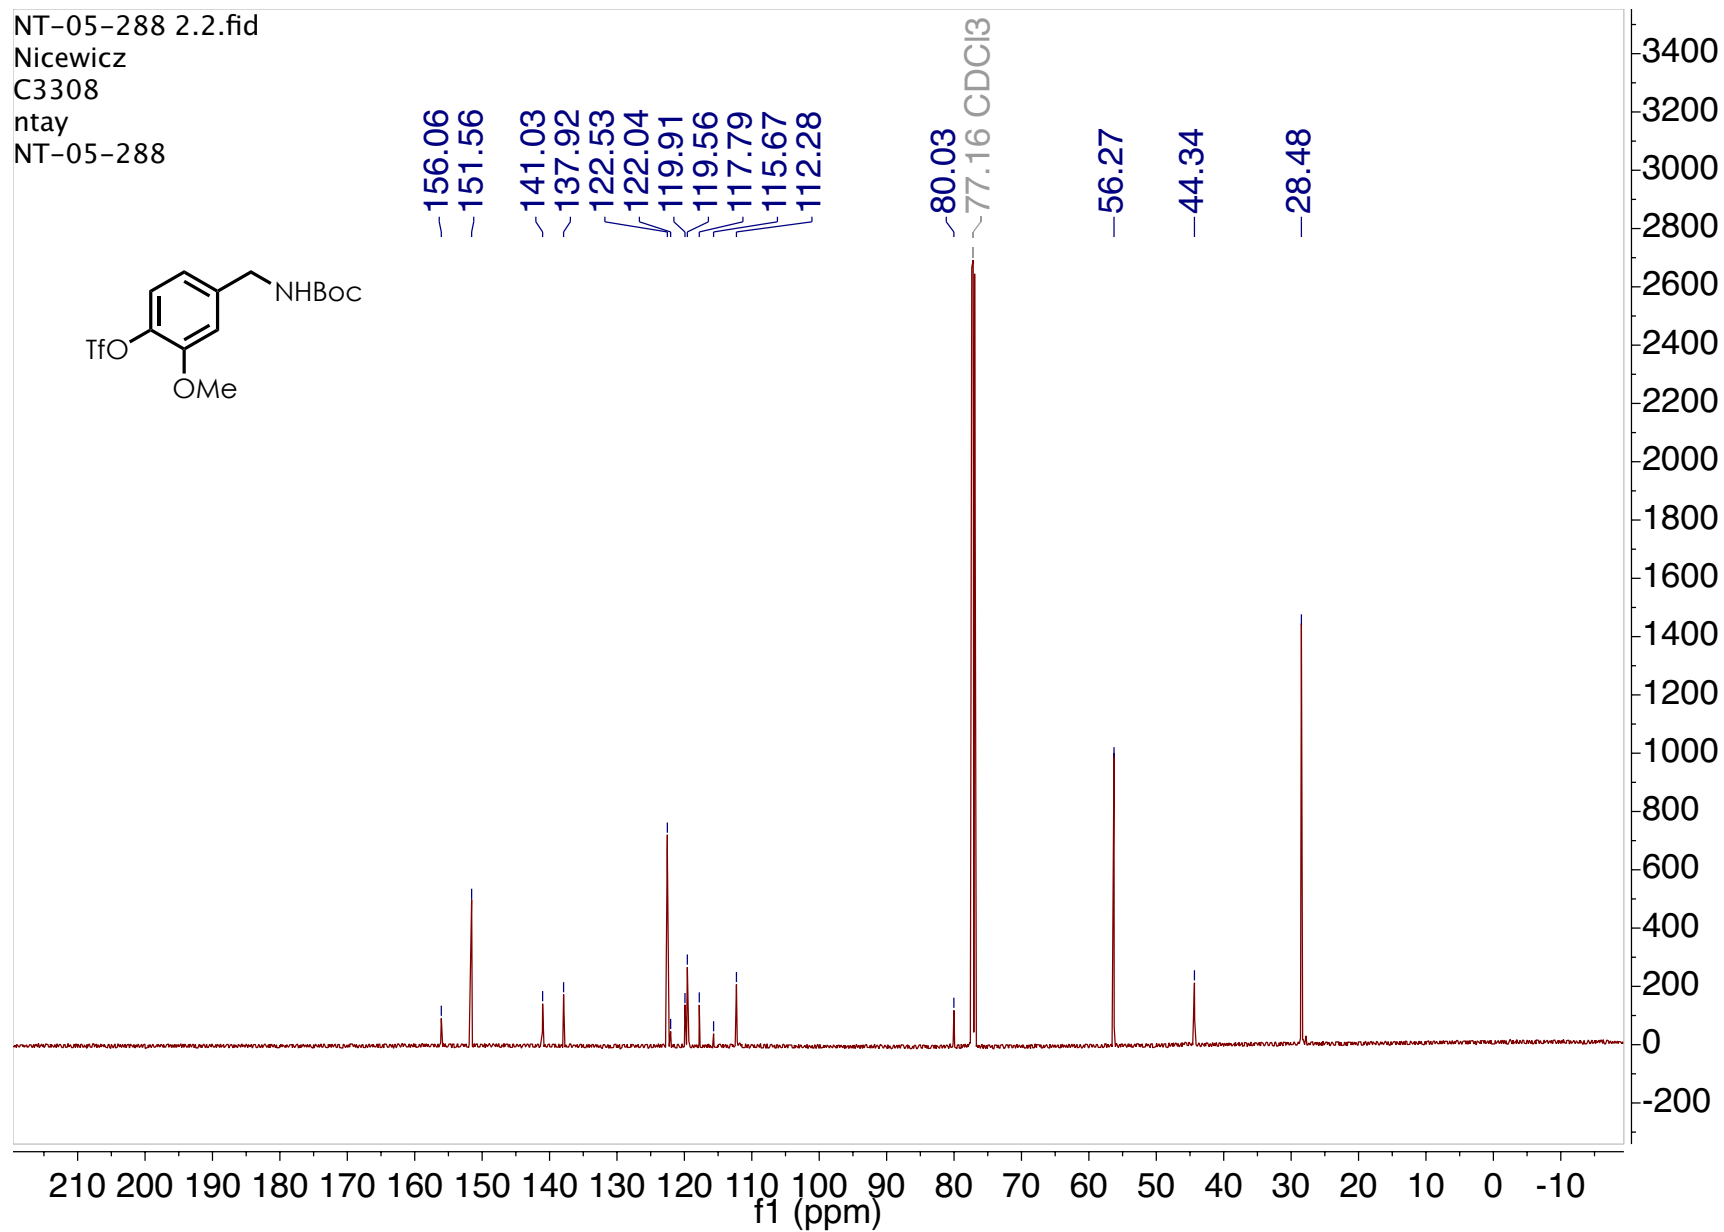

NT-05-288-19F.1.fid  
F19 CDCl<sub>3</sub> {C:\data\ntay} nmrsu 2

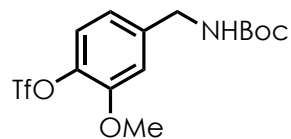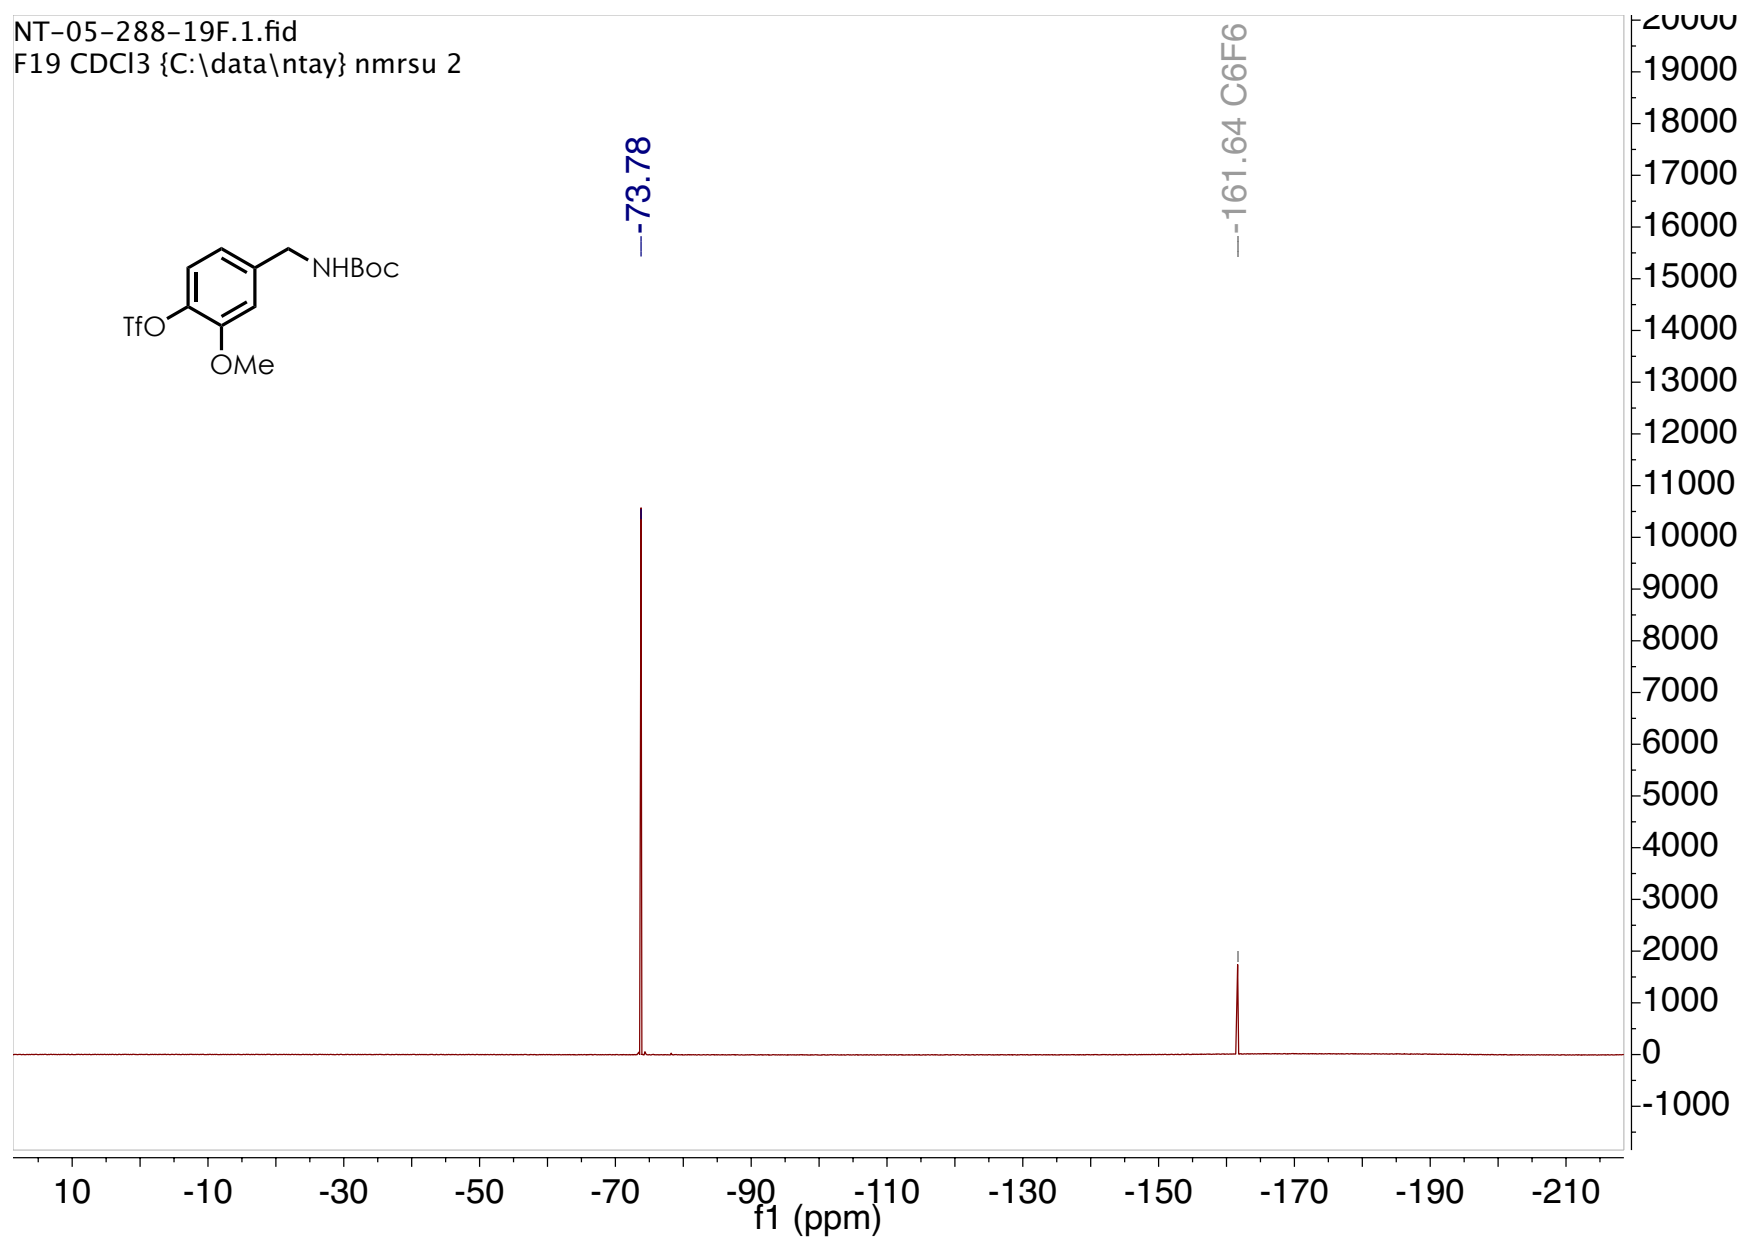

NT-06-26.2.fid  
 Nicewicz  
 5110718  
 nta  
 Title NT-06-26

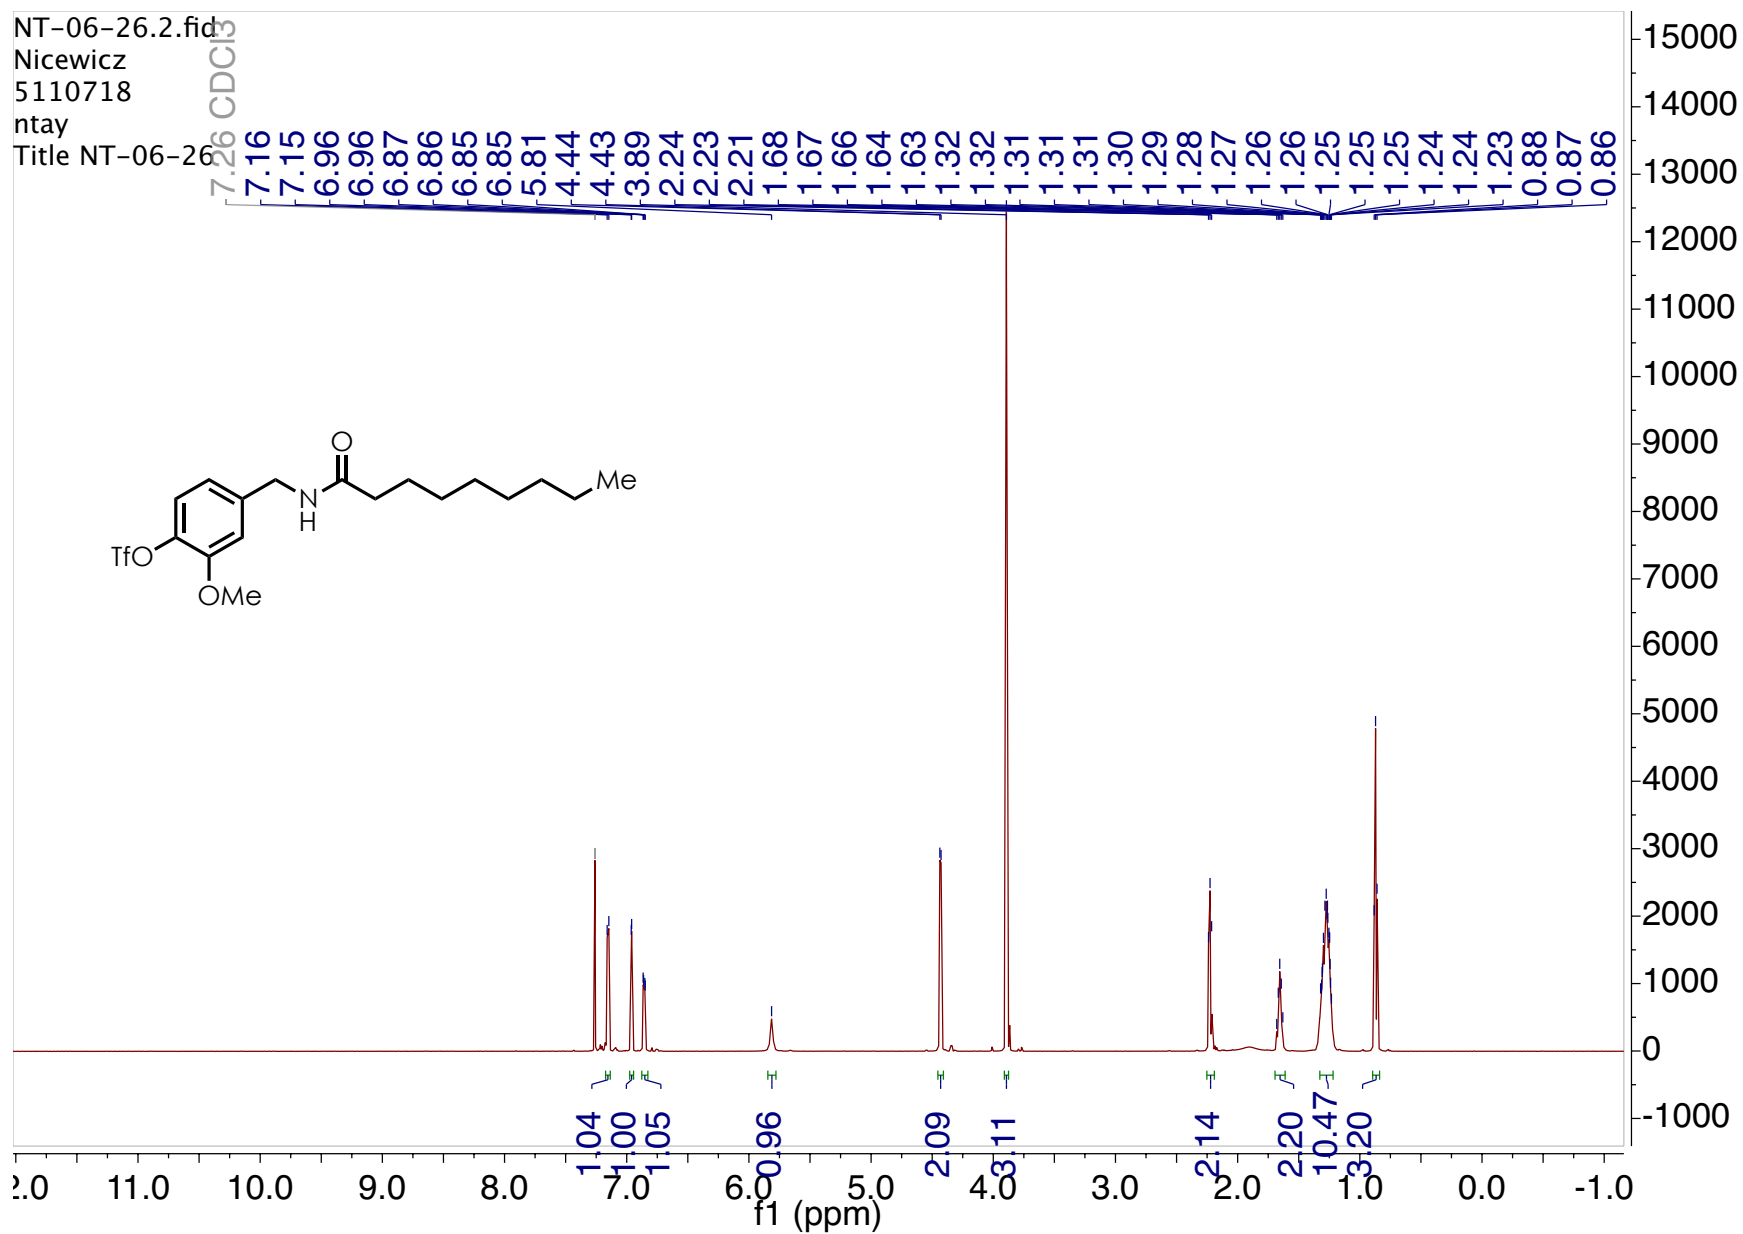

NT-06-26 2.3.fid  
Nicewicz  
5110718  
ntay  
Title NT-06-26

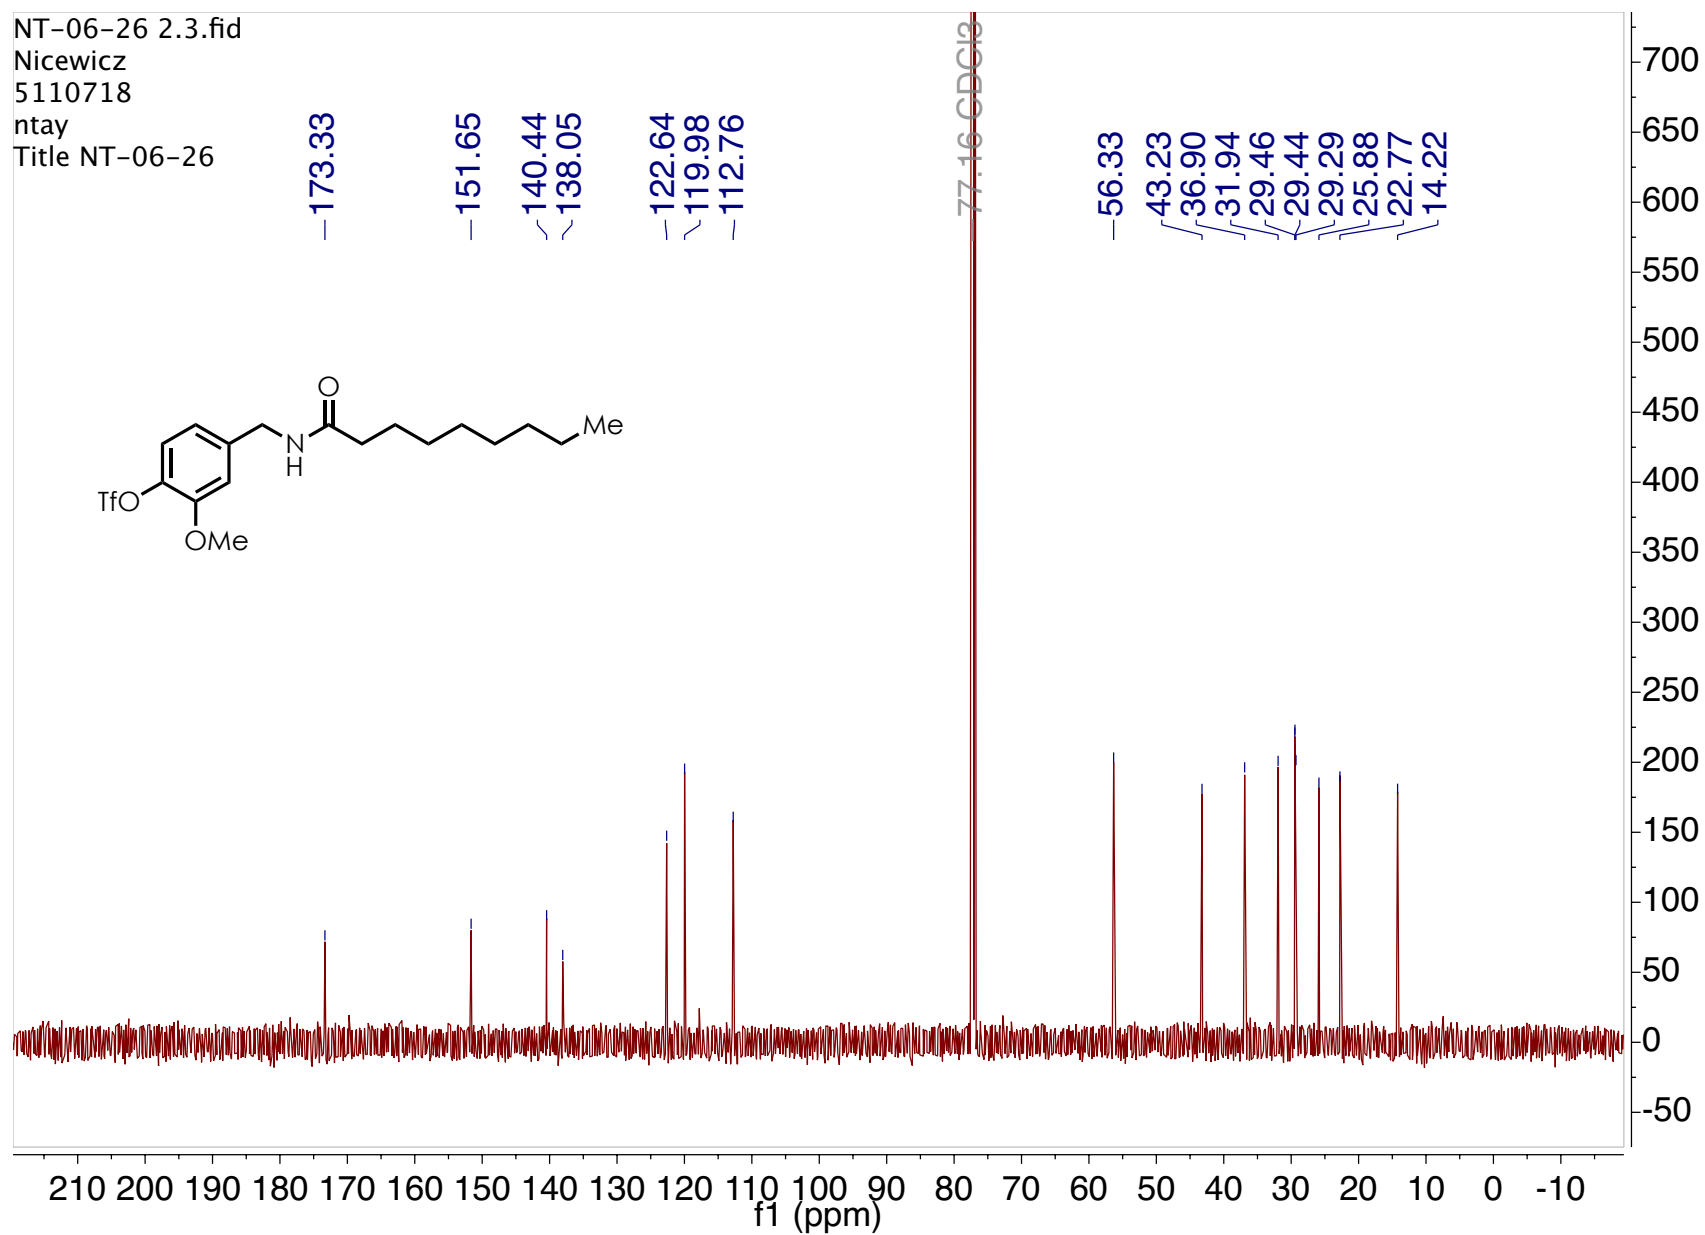

NT-06-26-19F 2.2.fid  
F19 CDCl3 {C:\data\ntay} nmrsu 10

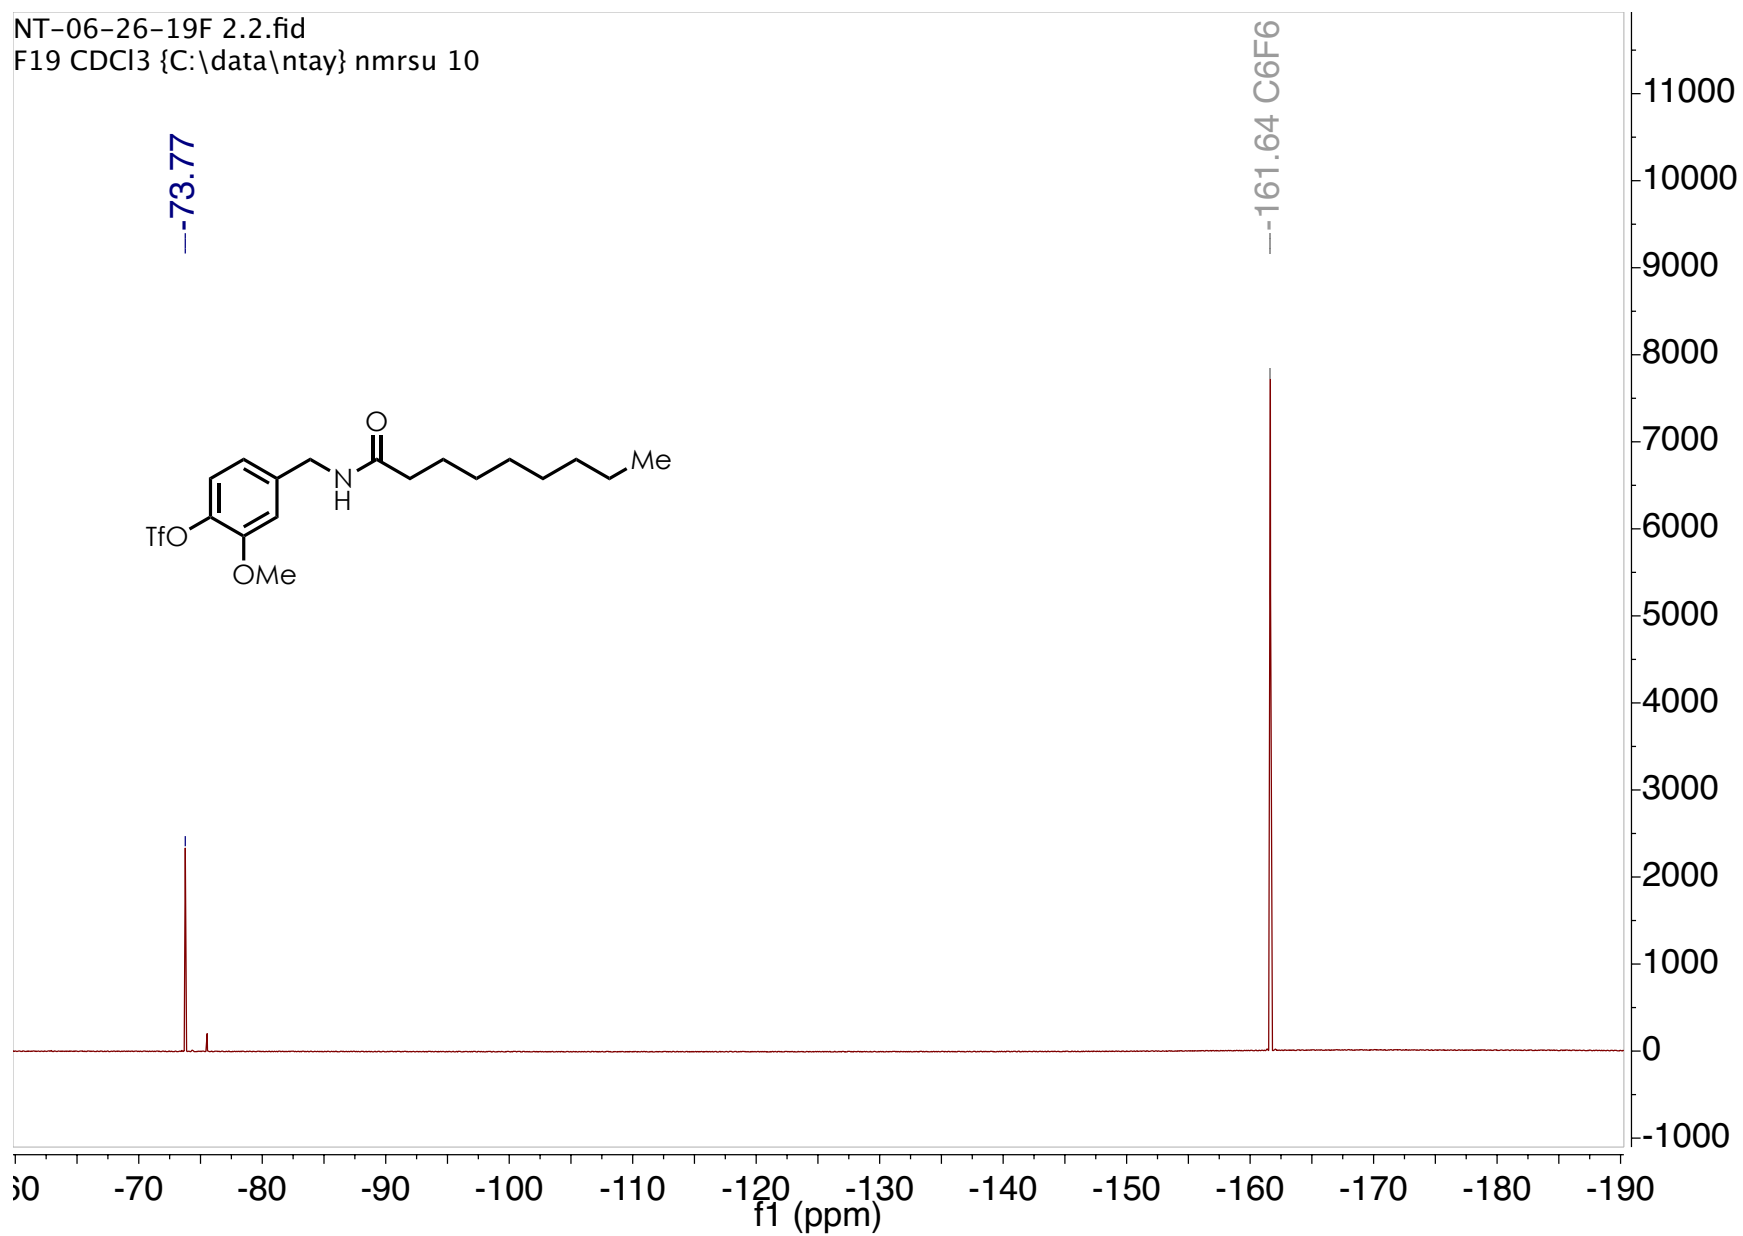

NT-06-180.1.fid  
NT-06-180

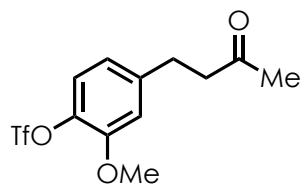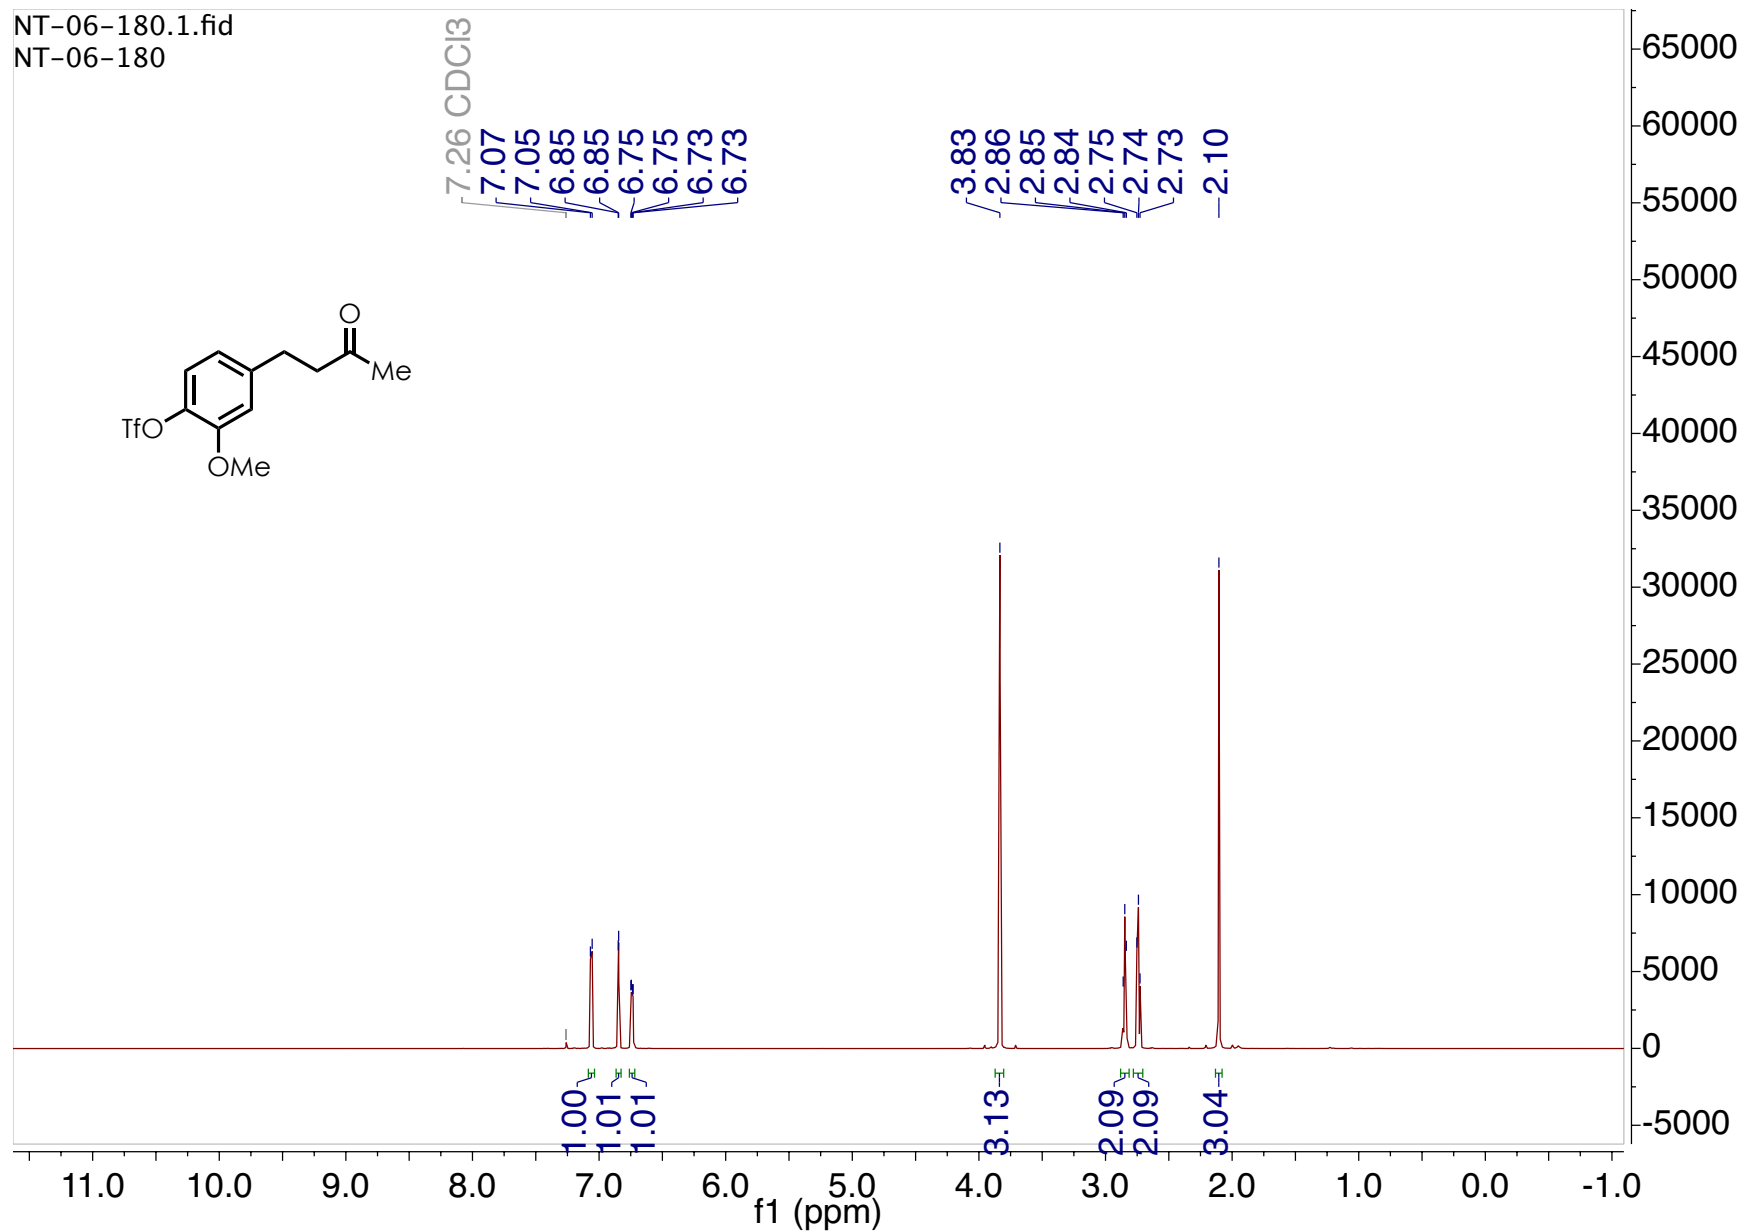

NT-06-180-13C.1.fid  
NT-06-180-13C

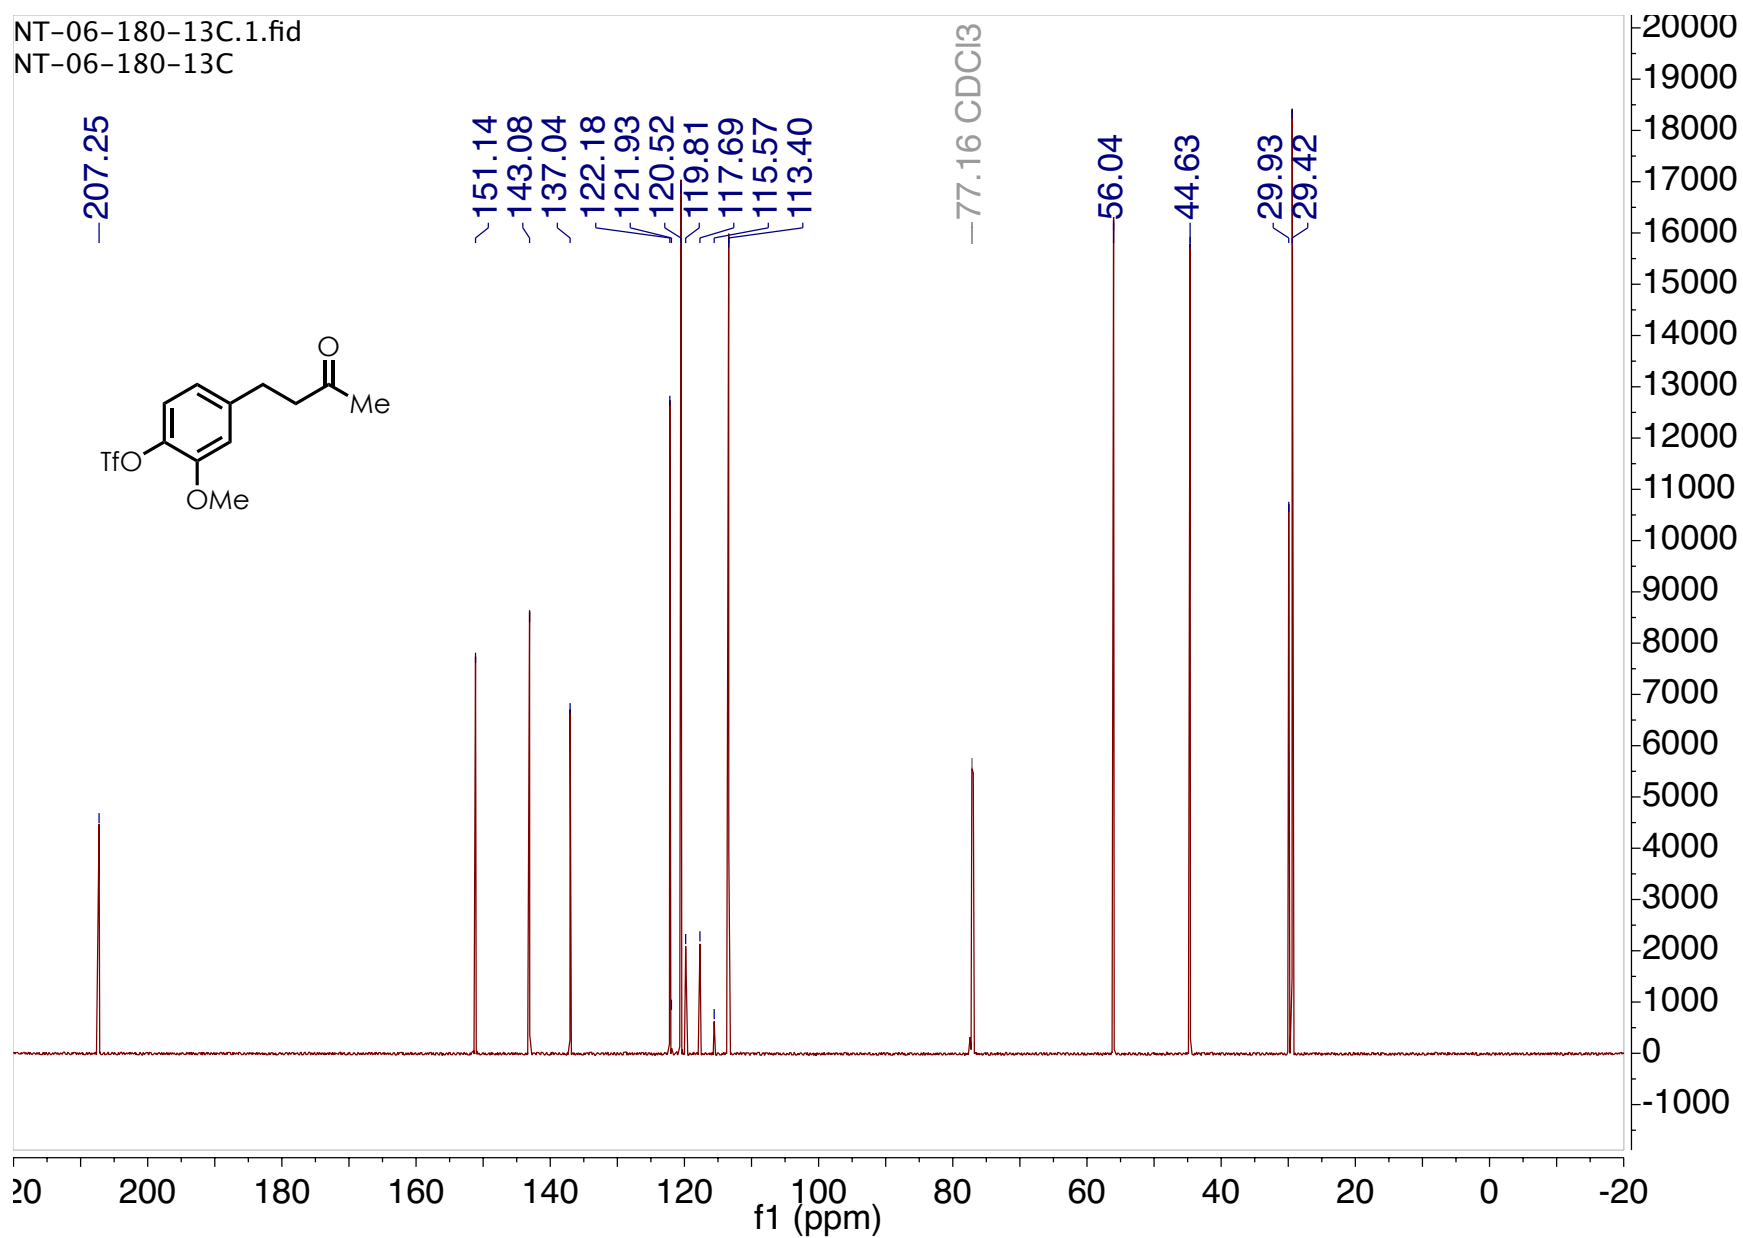

NT-06-180-19F.1.fid  
NT-06-180-19F

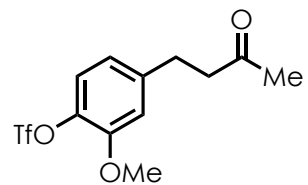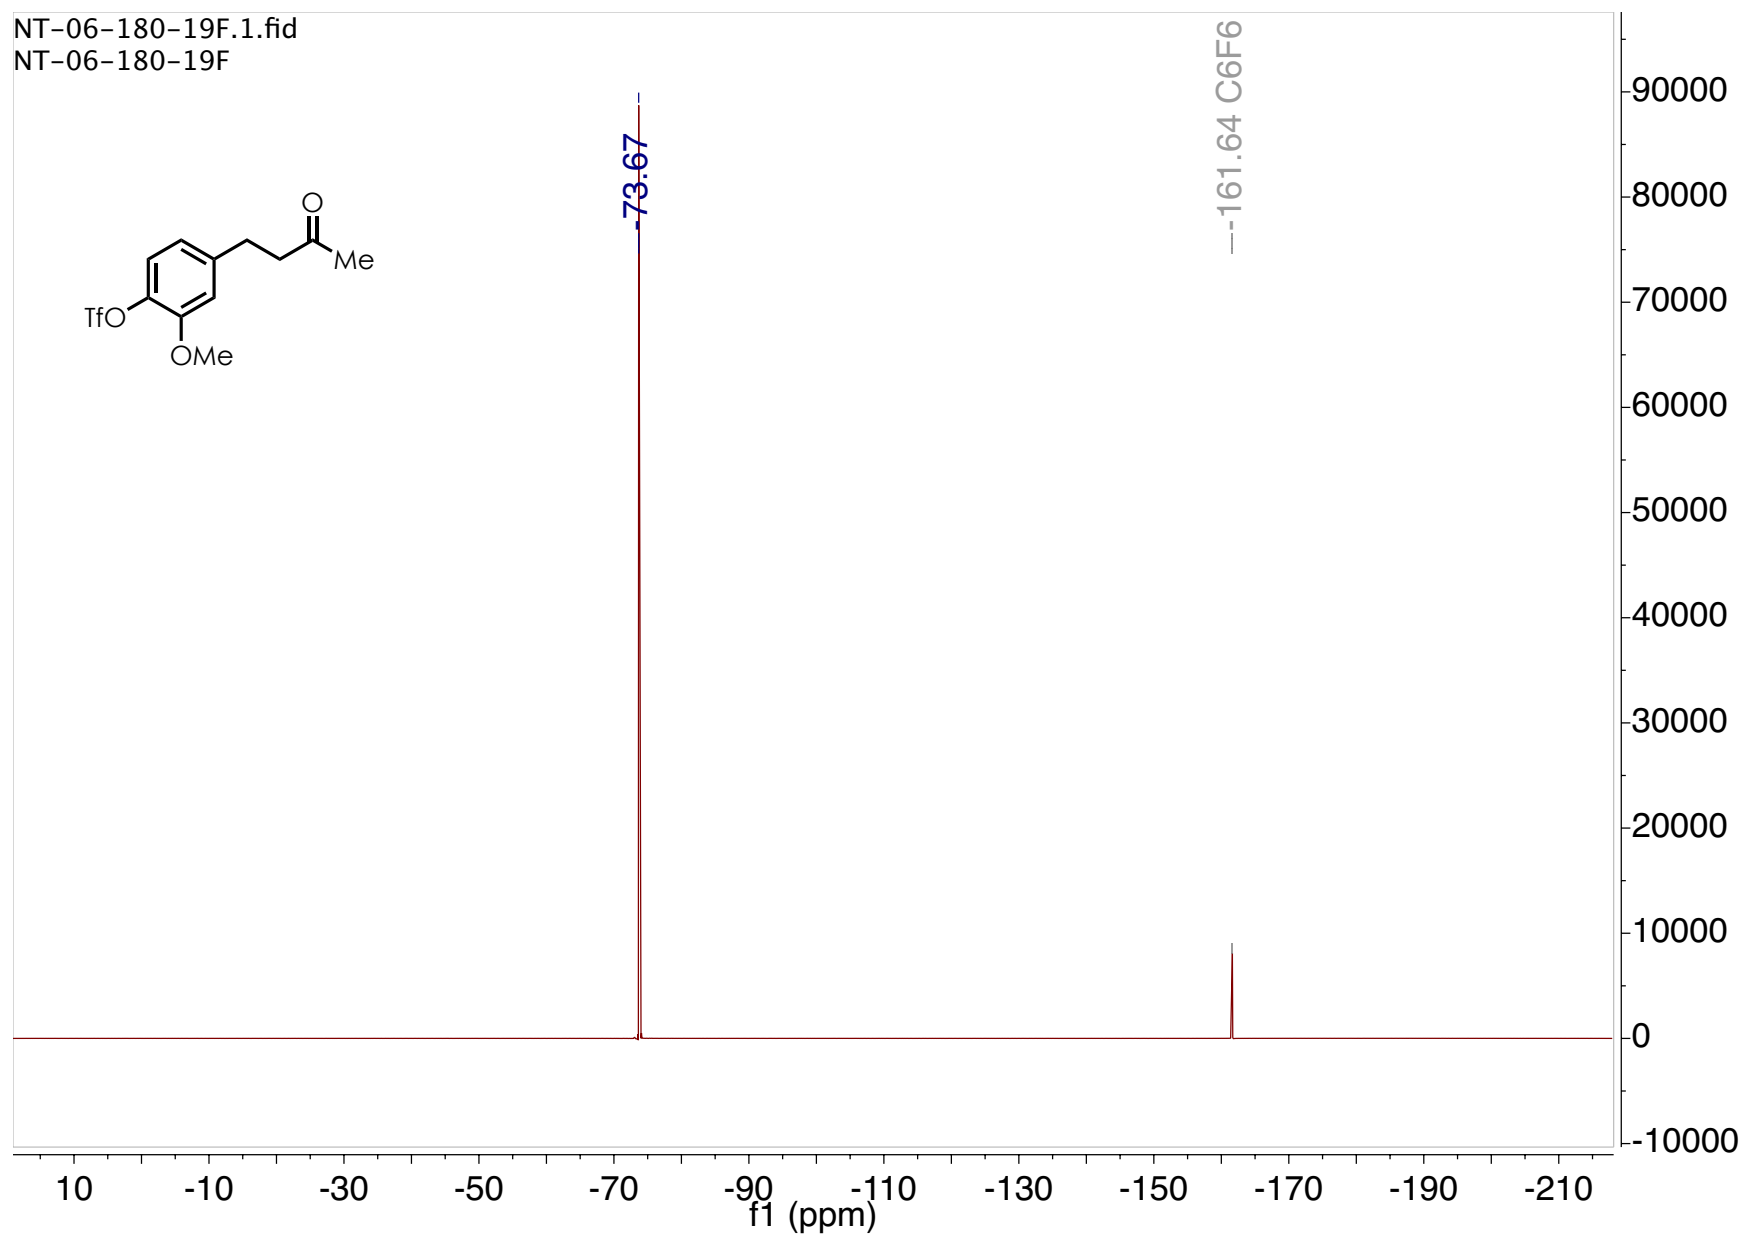

NT-05-100.1.fid  
 Nicewicz  
 C3308  
 ntay  
 NT-05-100

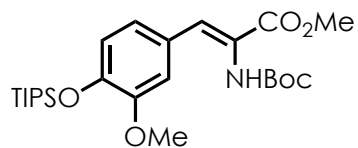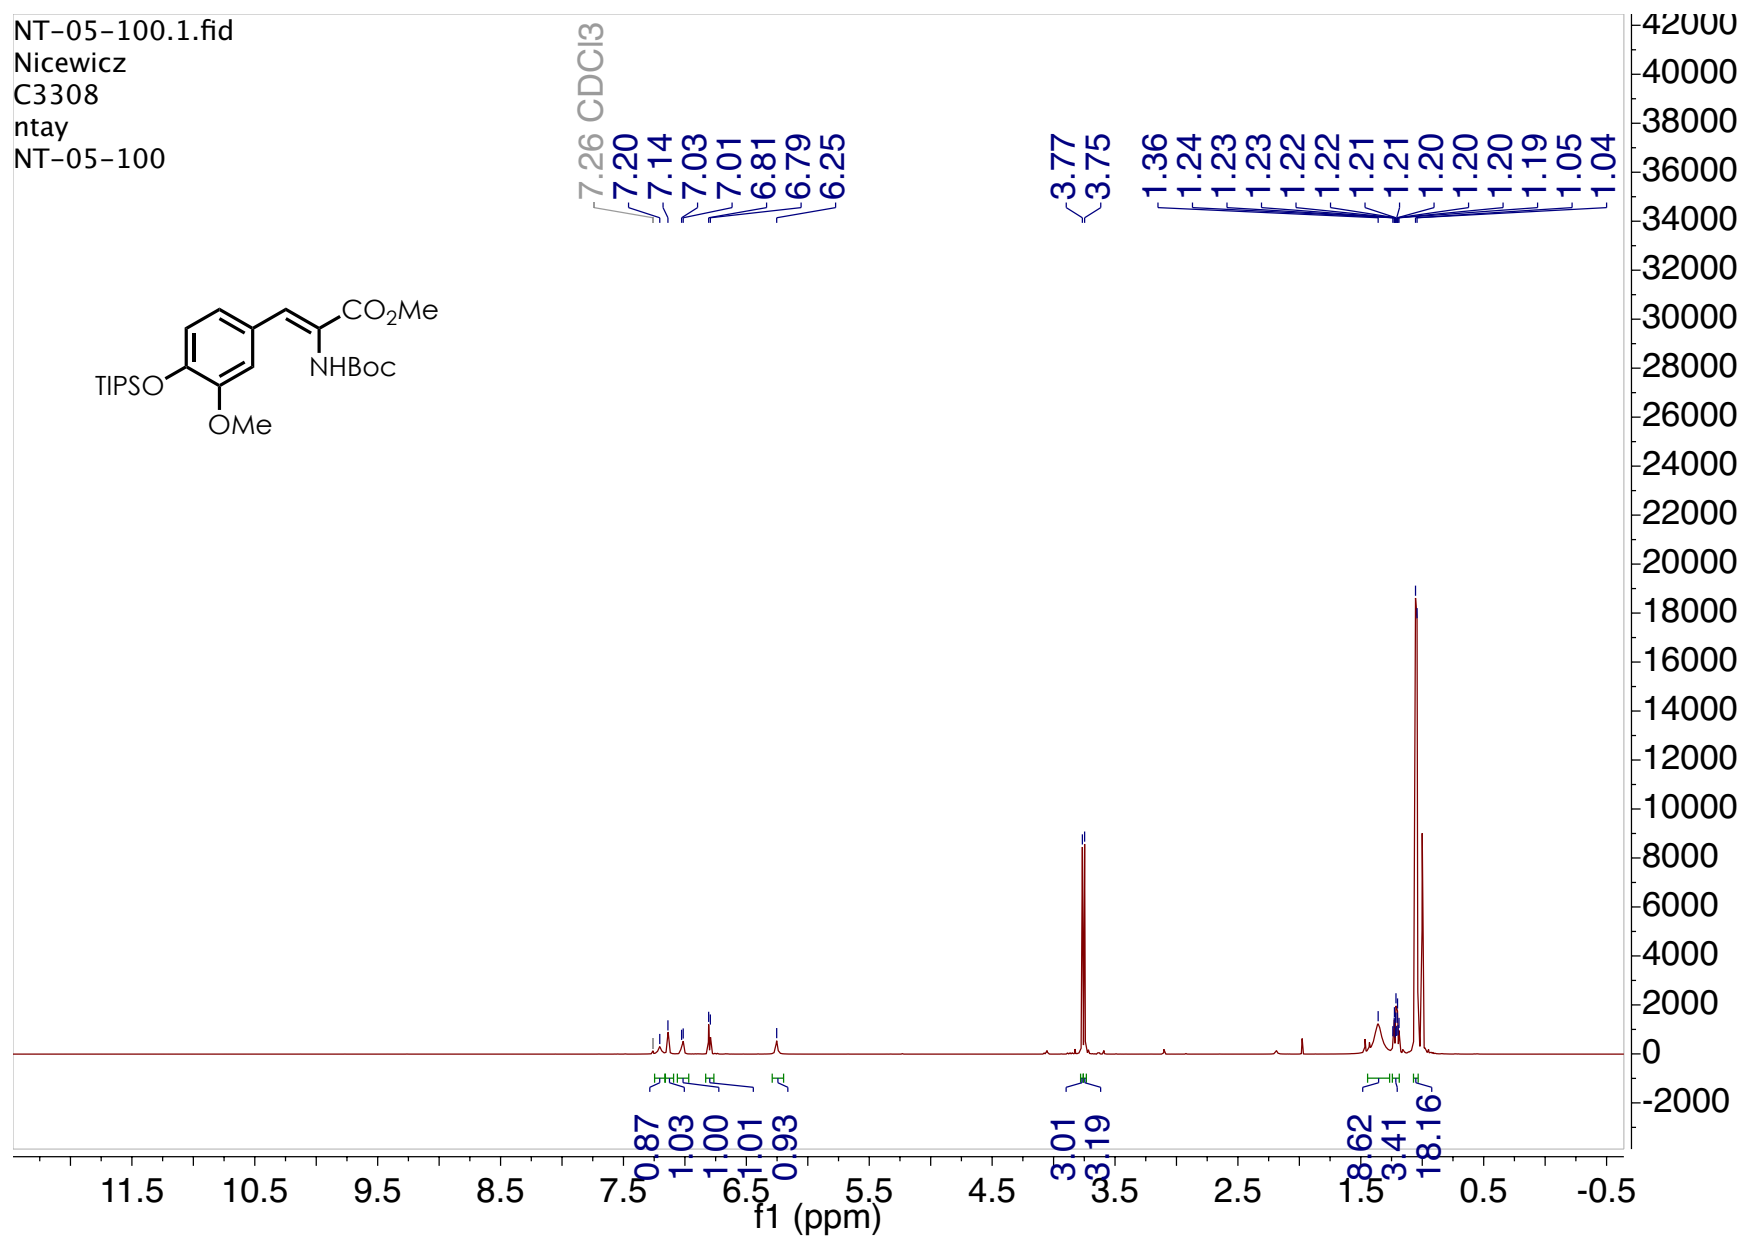

NT-05-100 2.2.fid  
Nicewicz  
C3308  
ntay  
NT-05-100

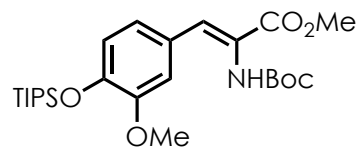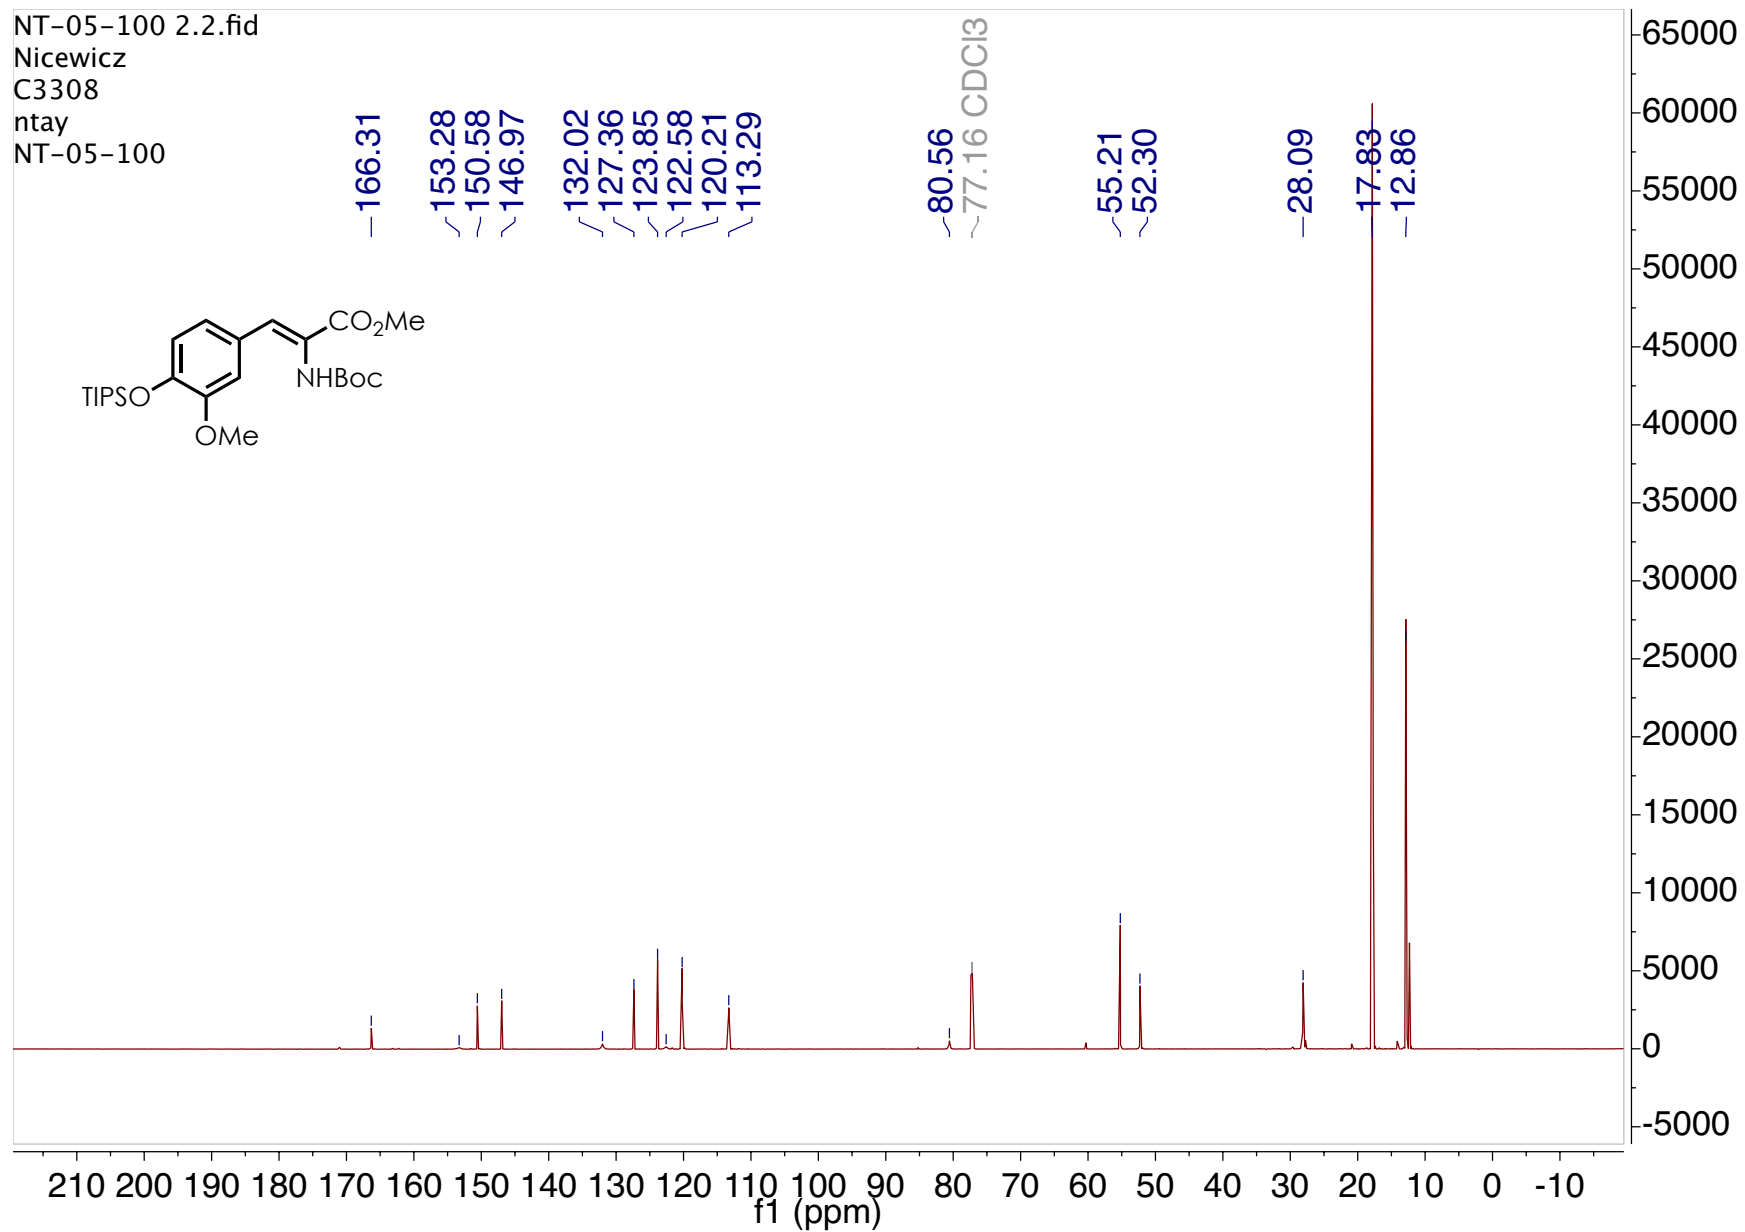

NT-05-109.1.fid  
 Nicewicz  
 C3308  
 ntay  
 NT-05-109

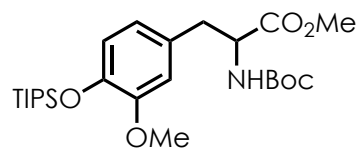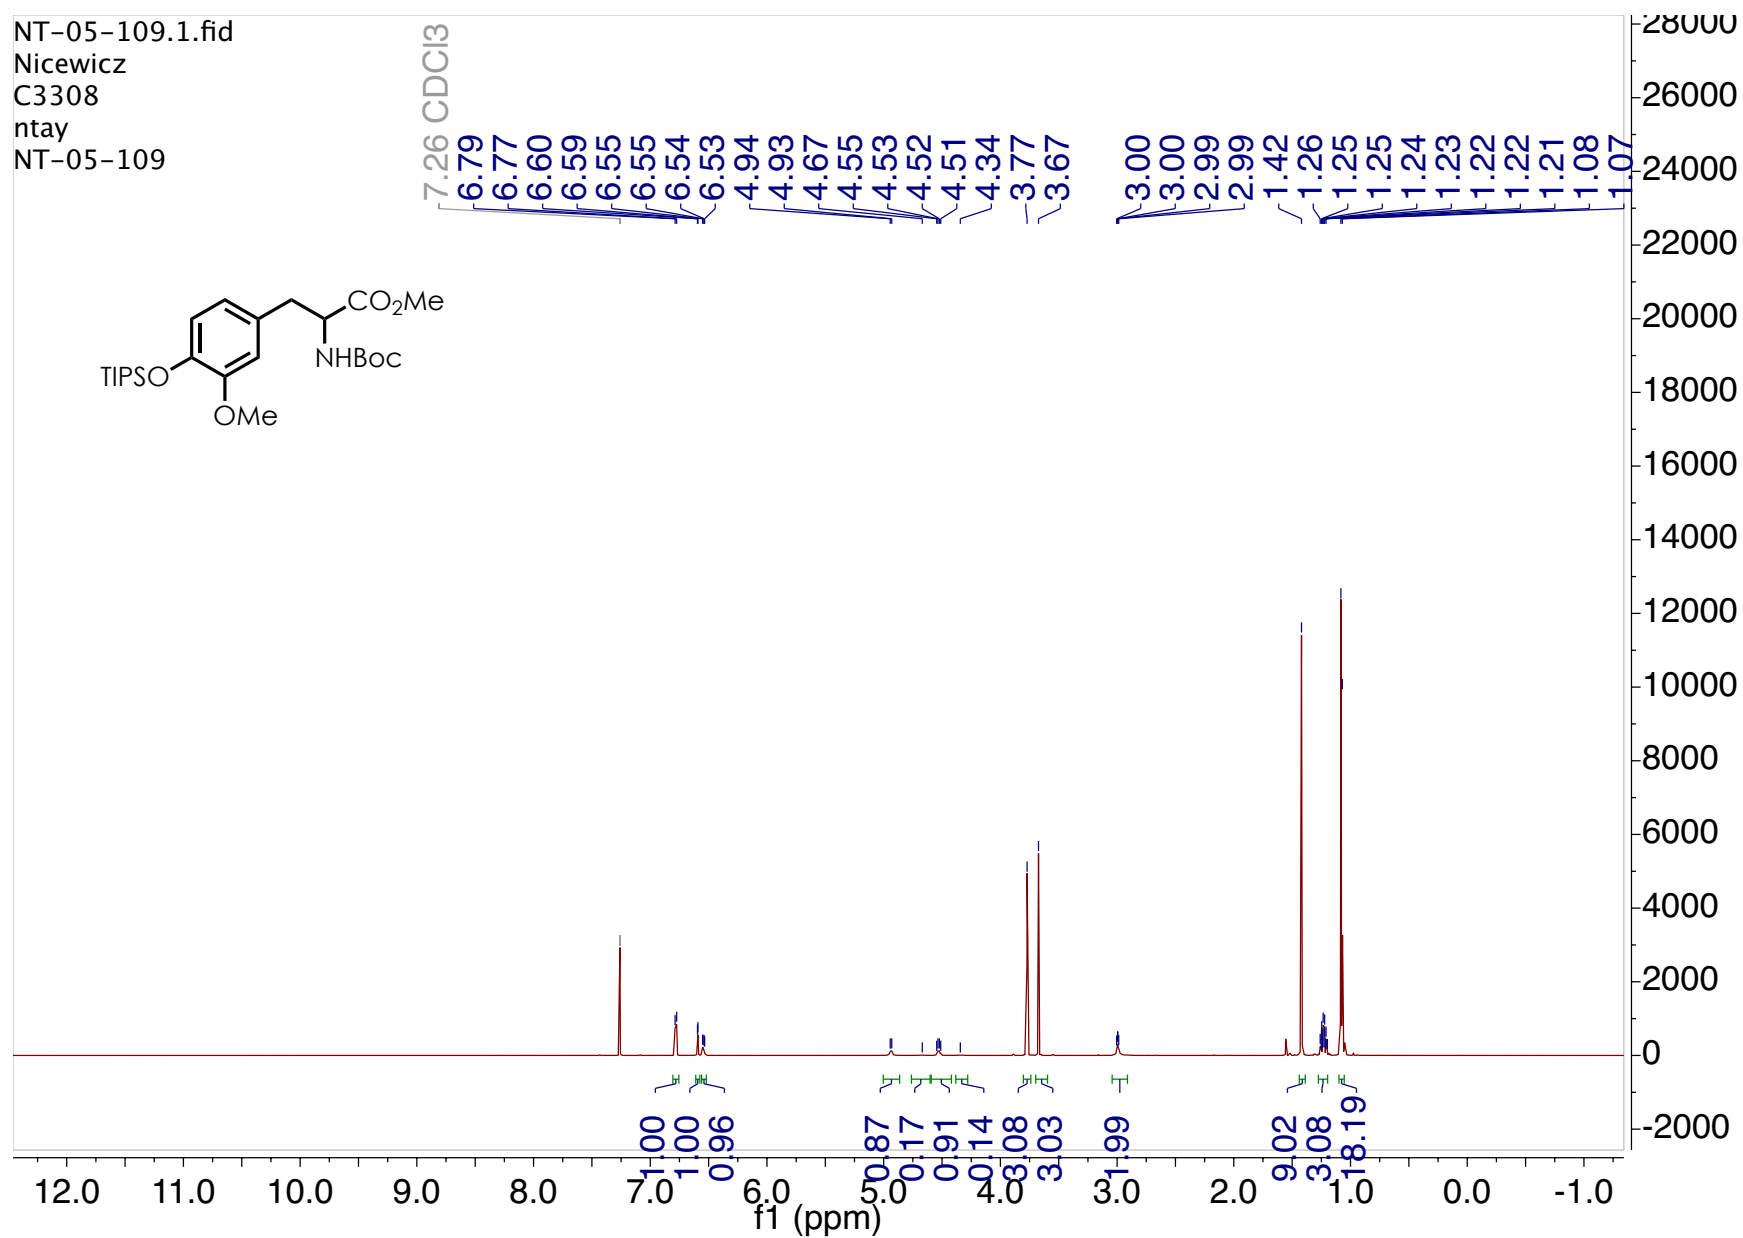

NT-05-109 2.2.fid  
 Nicewicz  
 C3308  
 ntay  
 NT-05-109

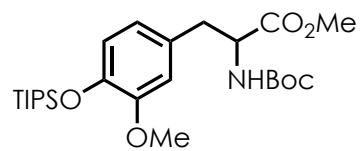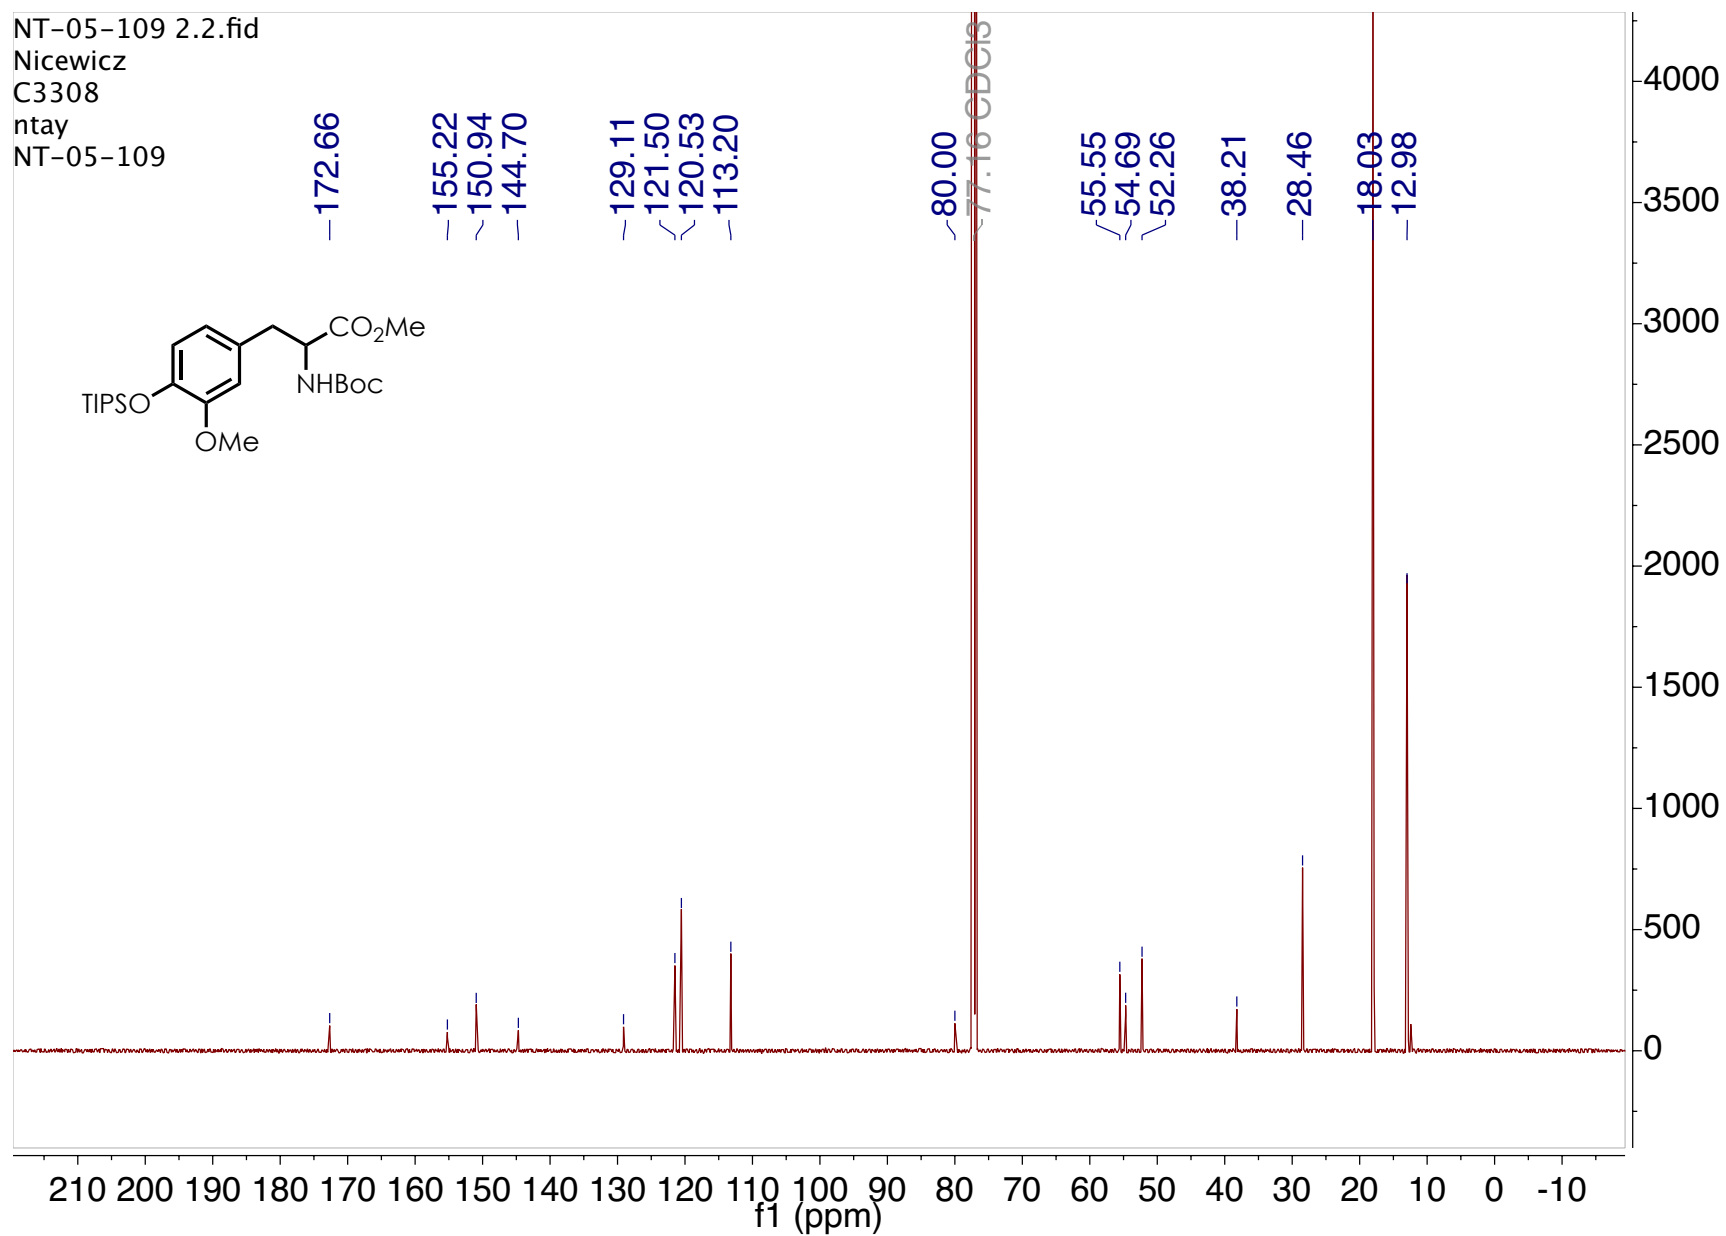

NT-05-299 2.1.fid

Nicewicz

5110718

ntay

NT-05-299

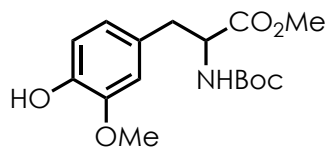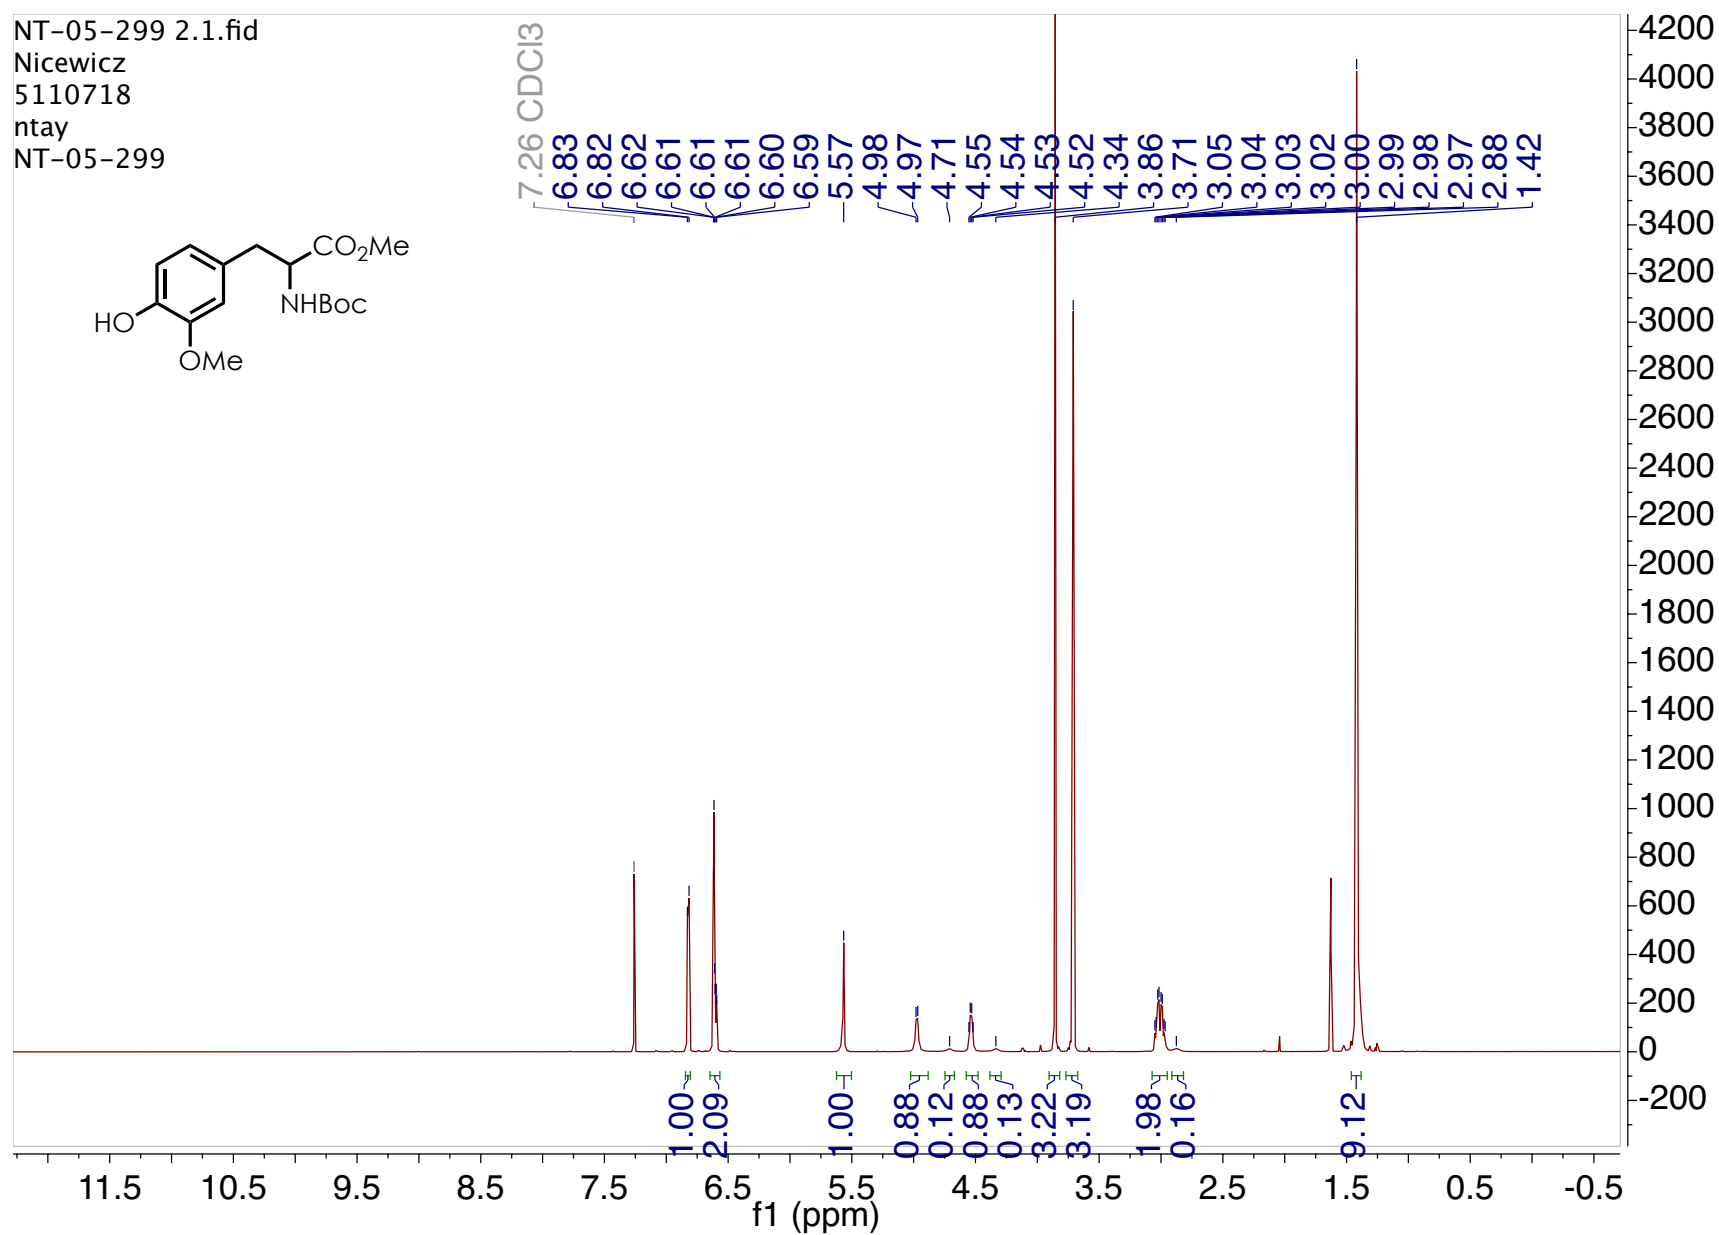

NT-05-299 3.2.fid

Nicewicz

5110718

ntay

NT-05-299

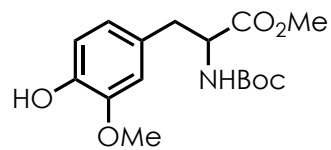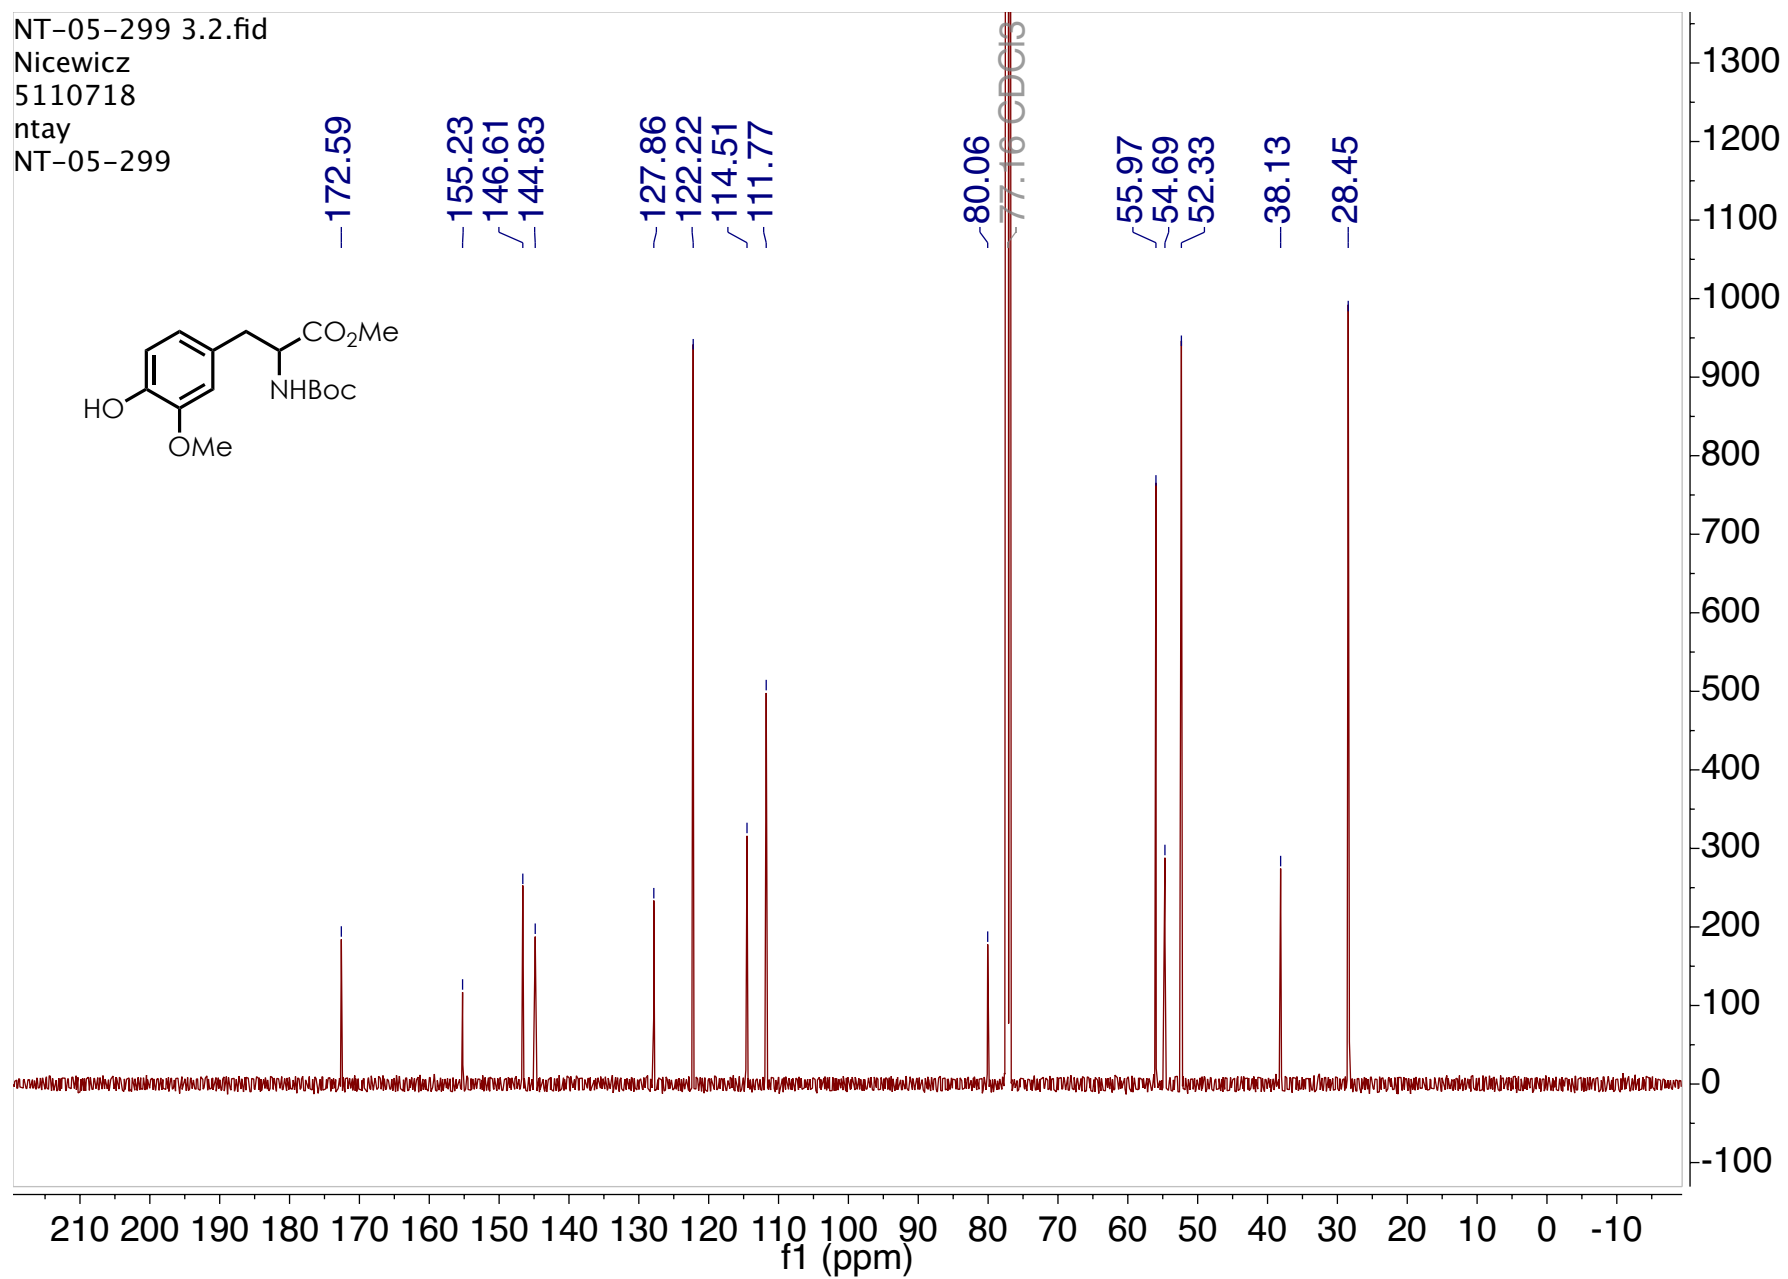

NT-06-03.1.fid  
 Nicewicz  
 5110718  
 ntay  
 NT-06-03

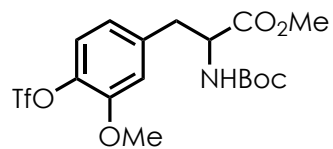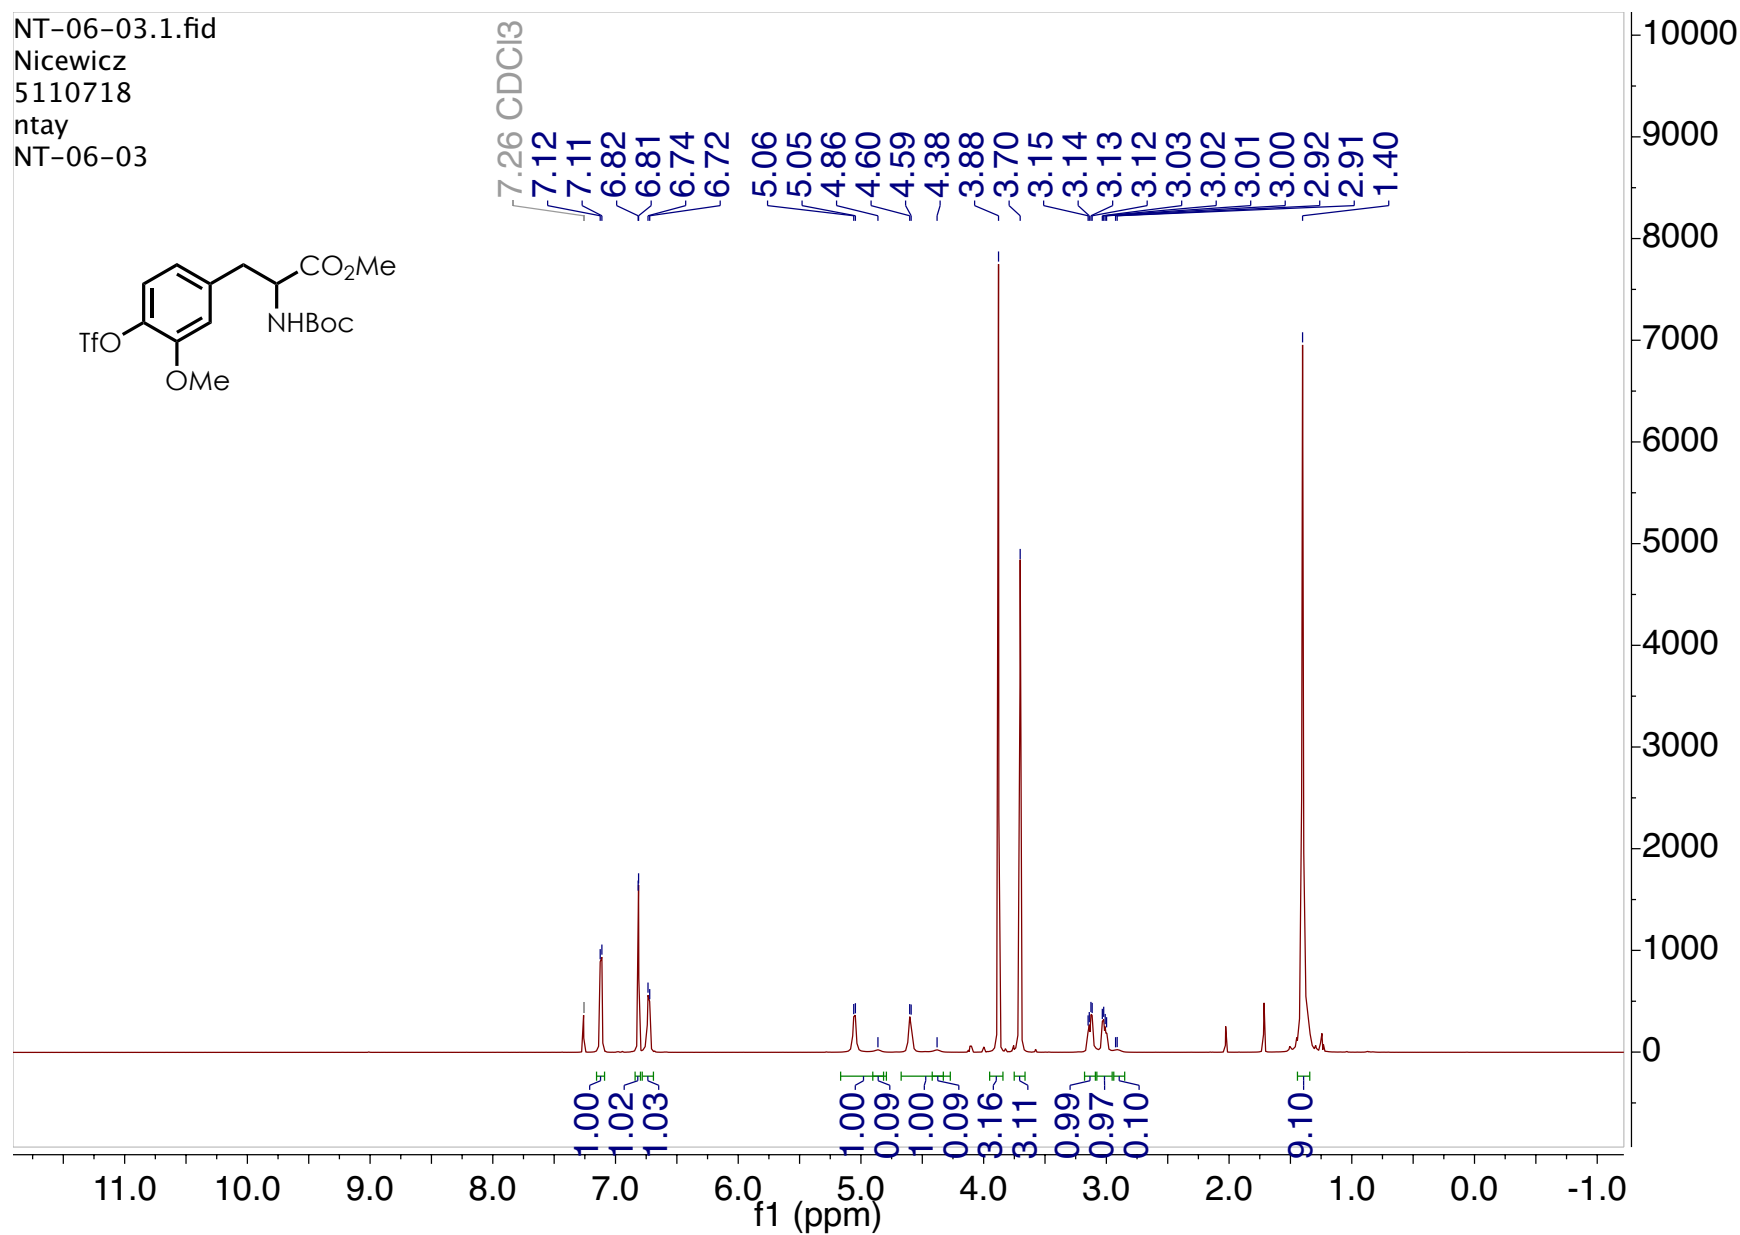

NT-06-03 2.2.fid

Nicewicz

5110718

ntay

NT-06-03

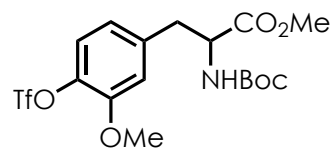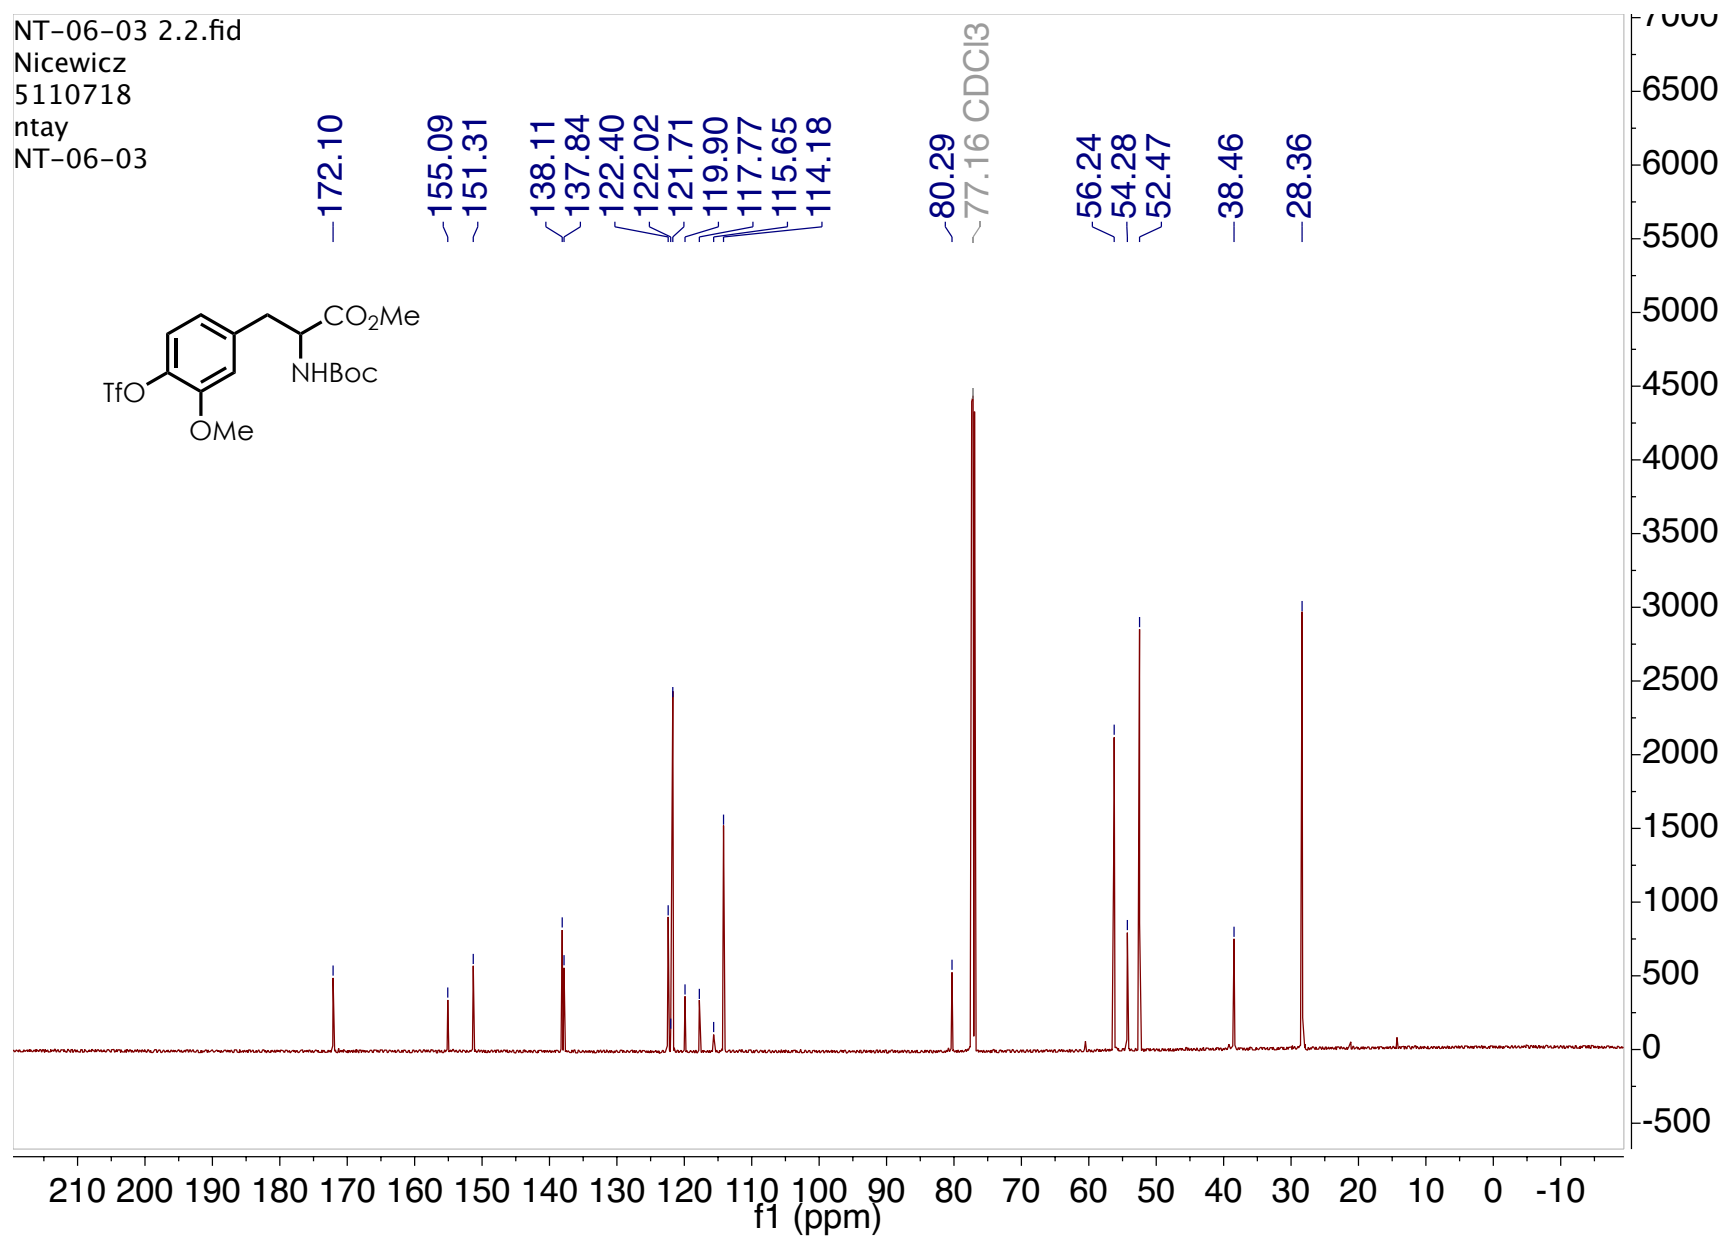

NT-06-45.1.fid  
Nicewicz  
5106082  
ntay  
NT-06-45

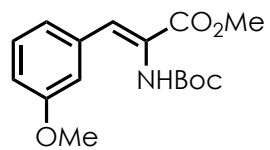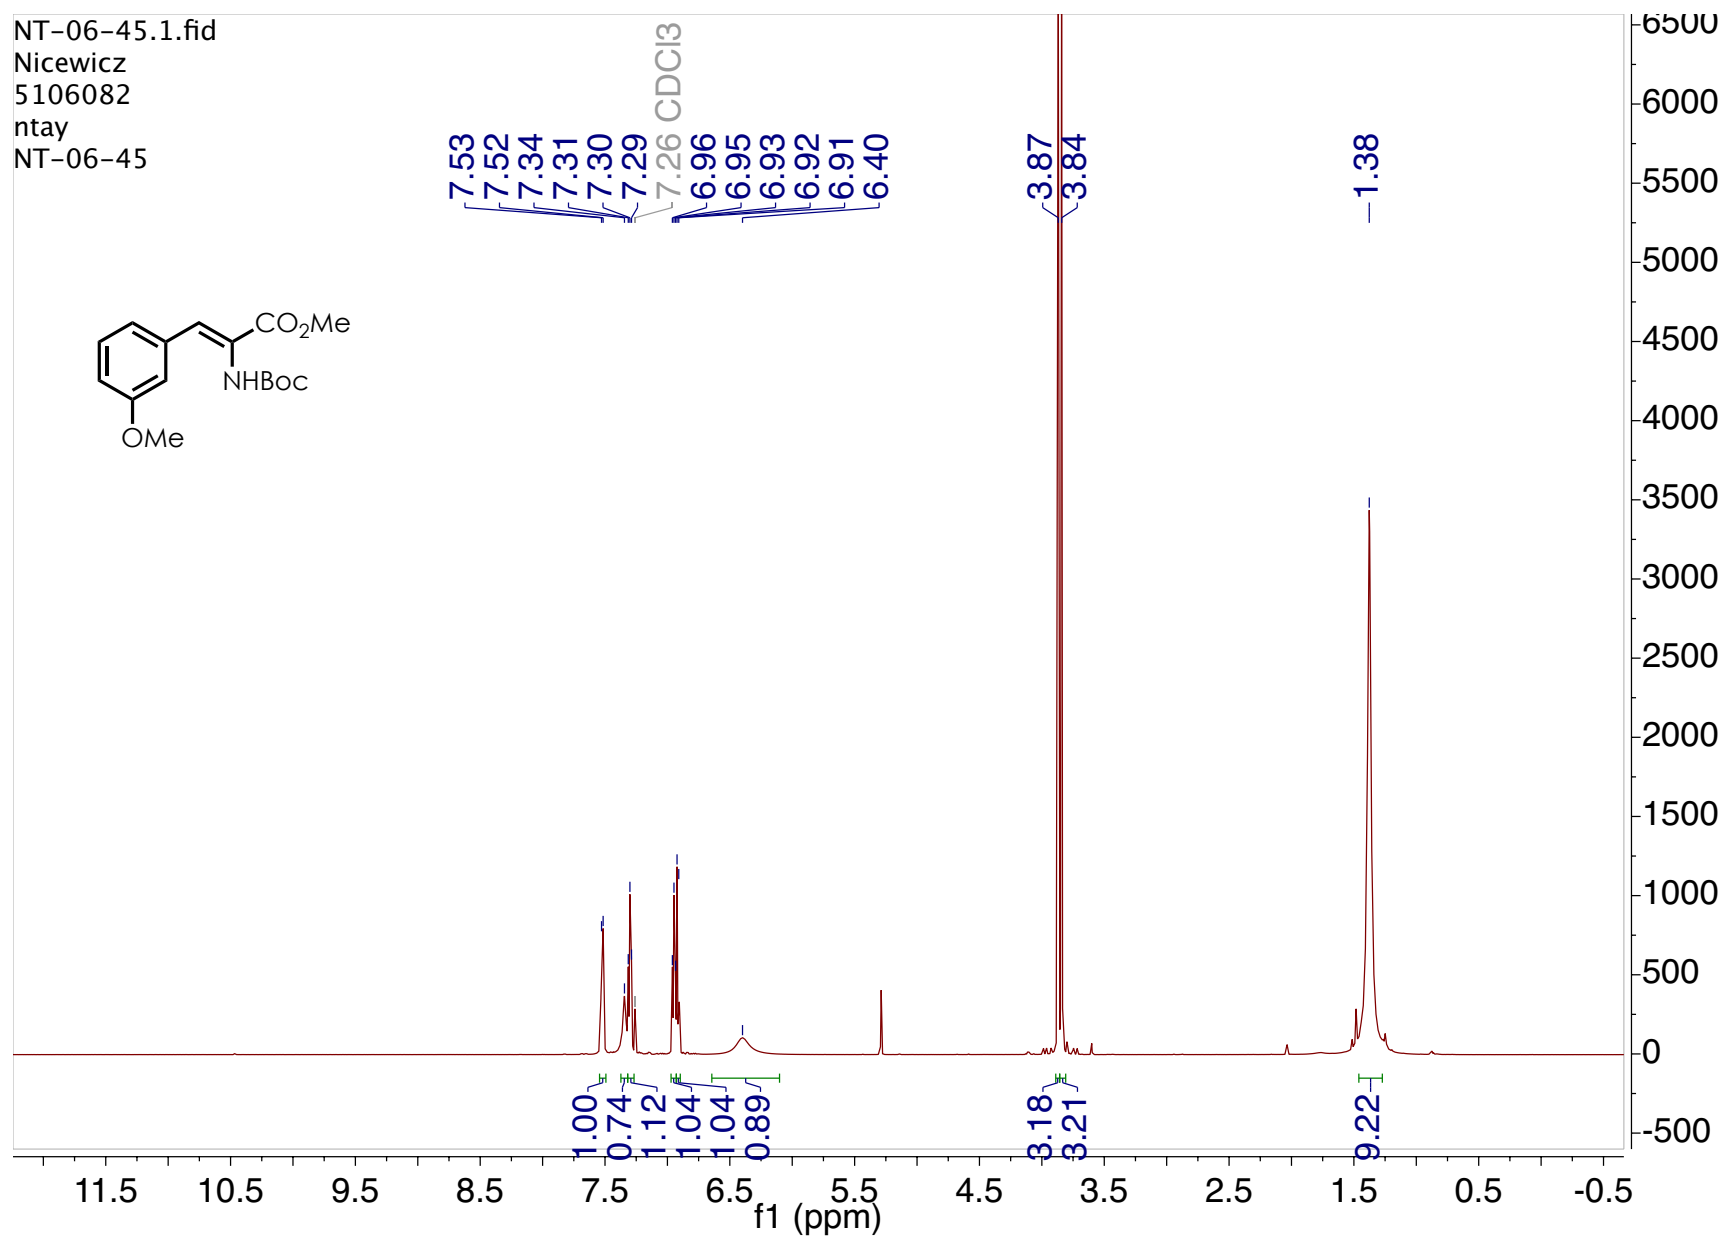

NT-06-45 2.2.fid

Nicewicz

5106082

ntay

NT-06-45

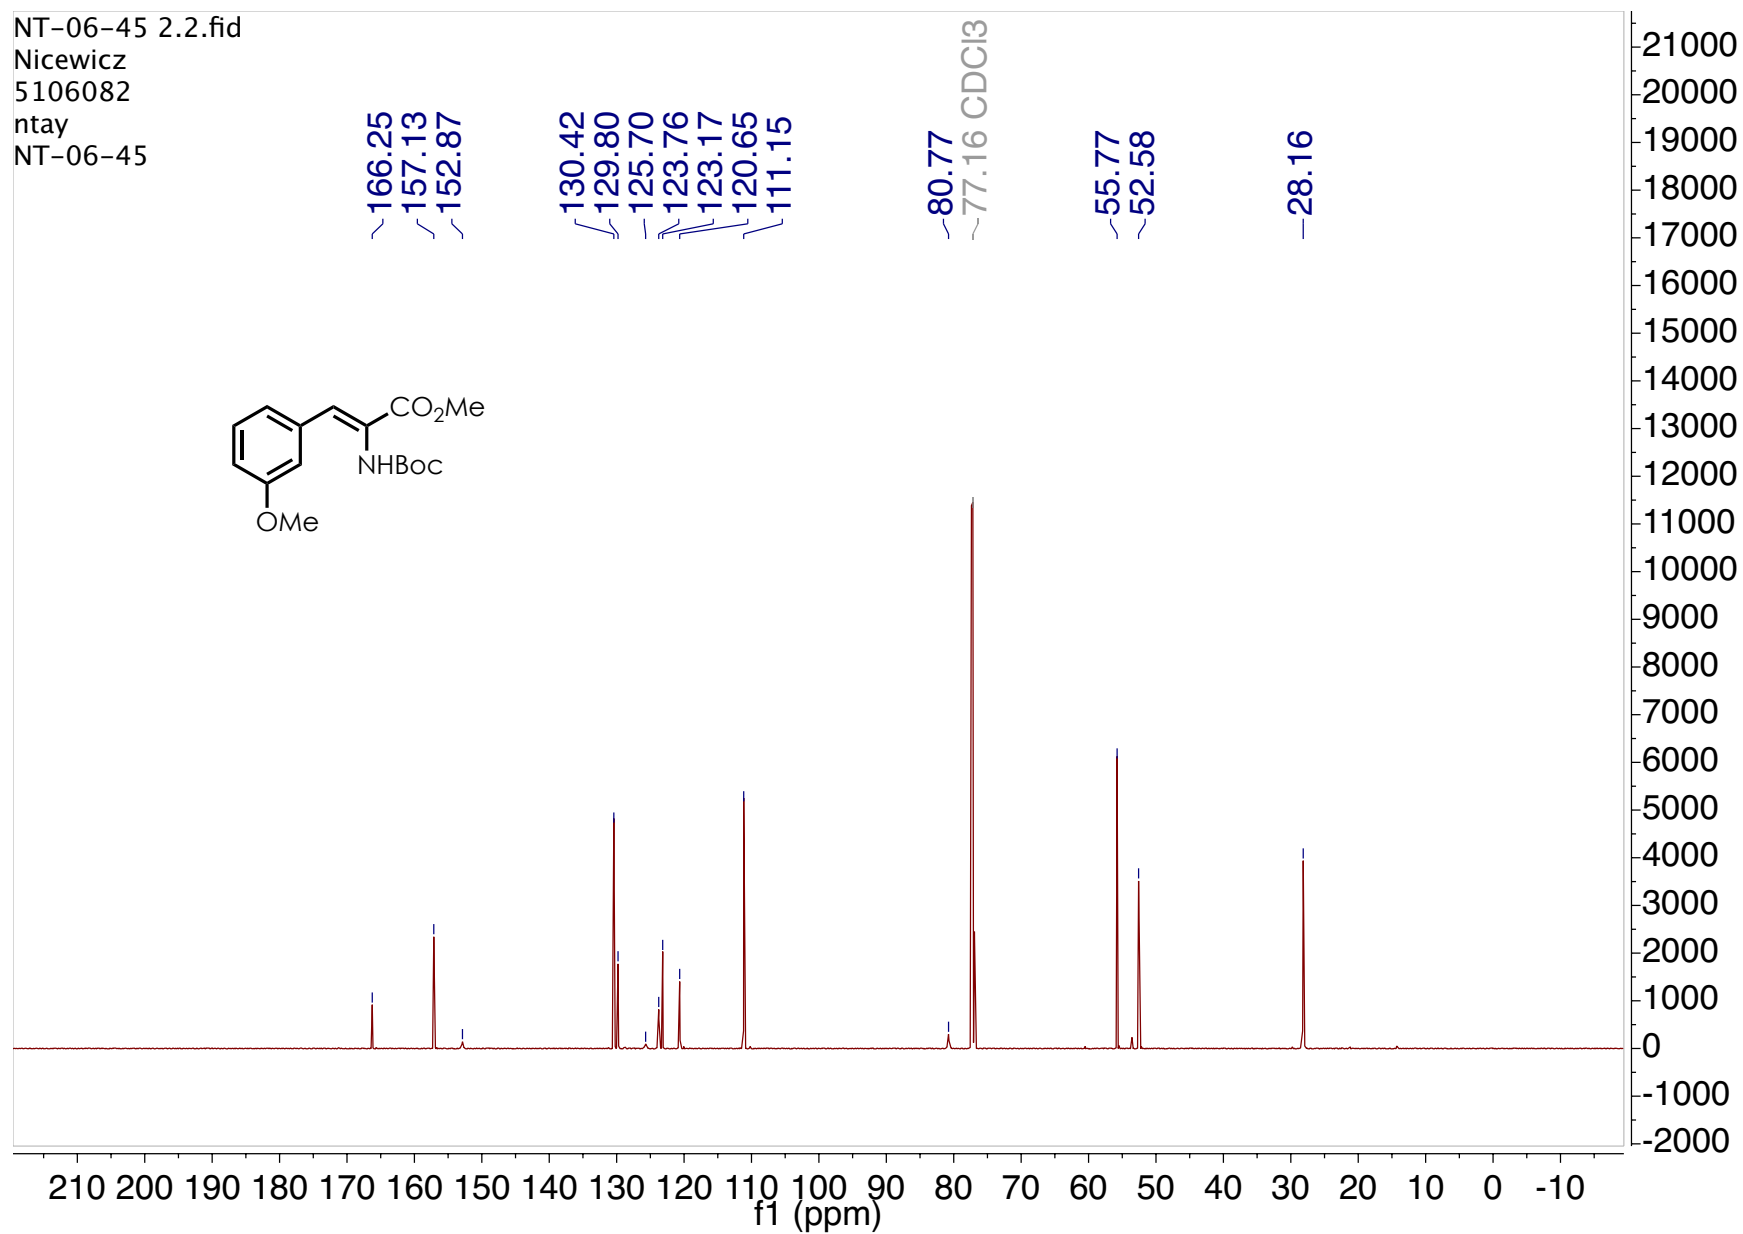

NT-06-3-19F.1.fid

F19 CDCl<sub>3</sub> {C:\data\ntay} nmrsu 34

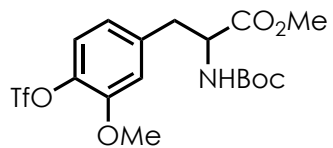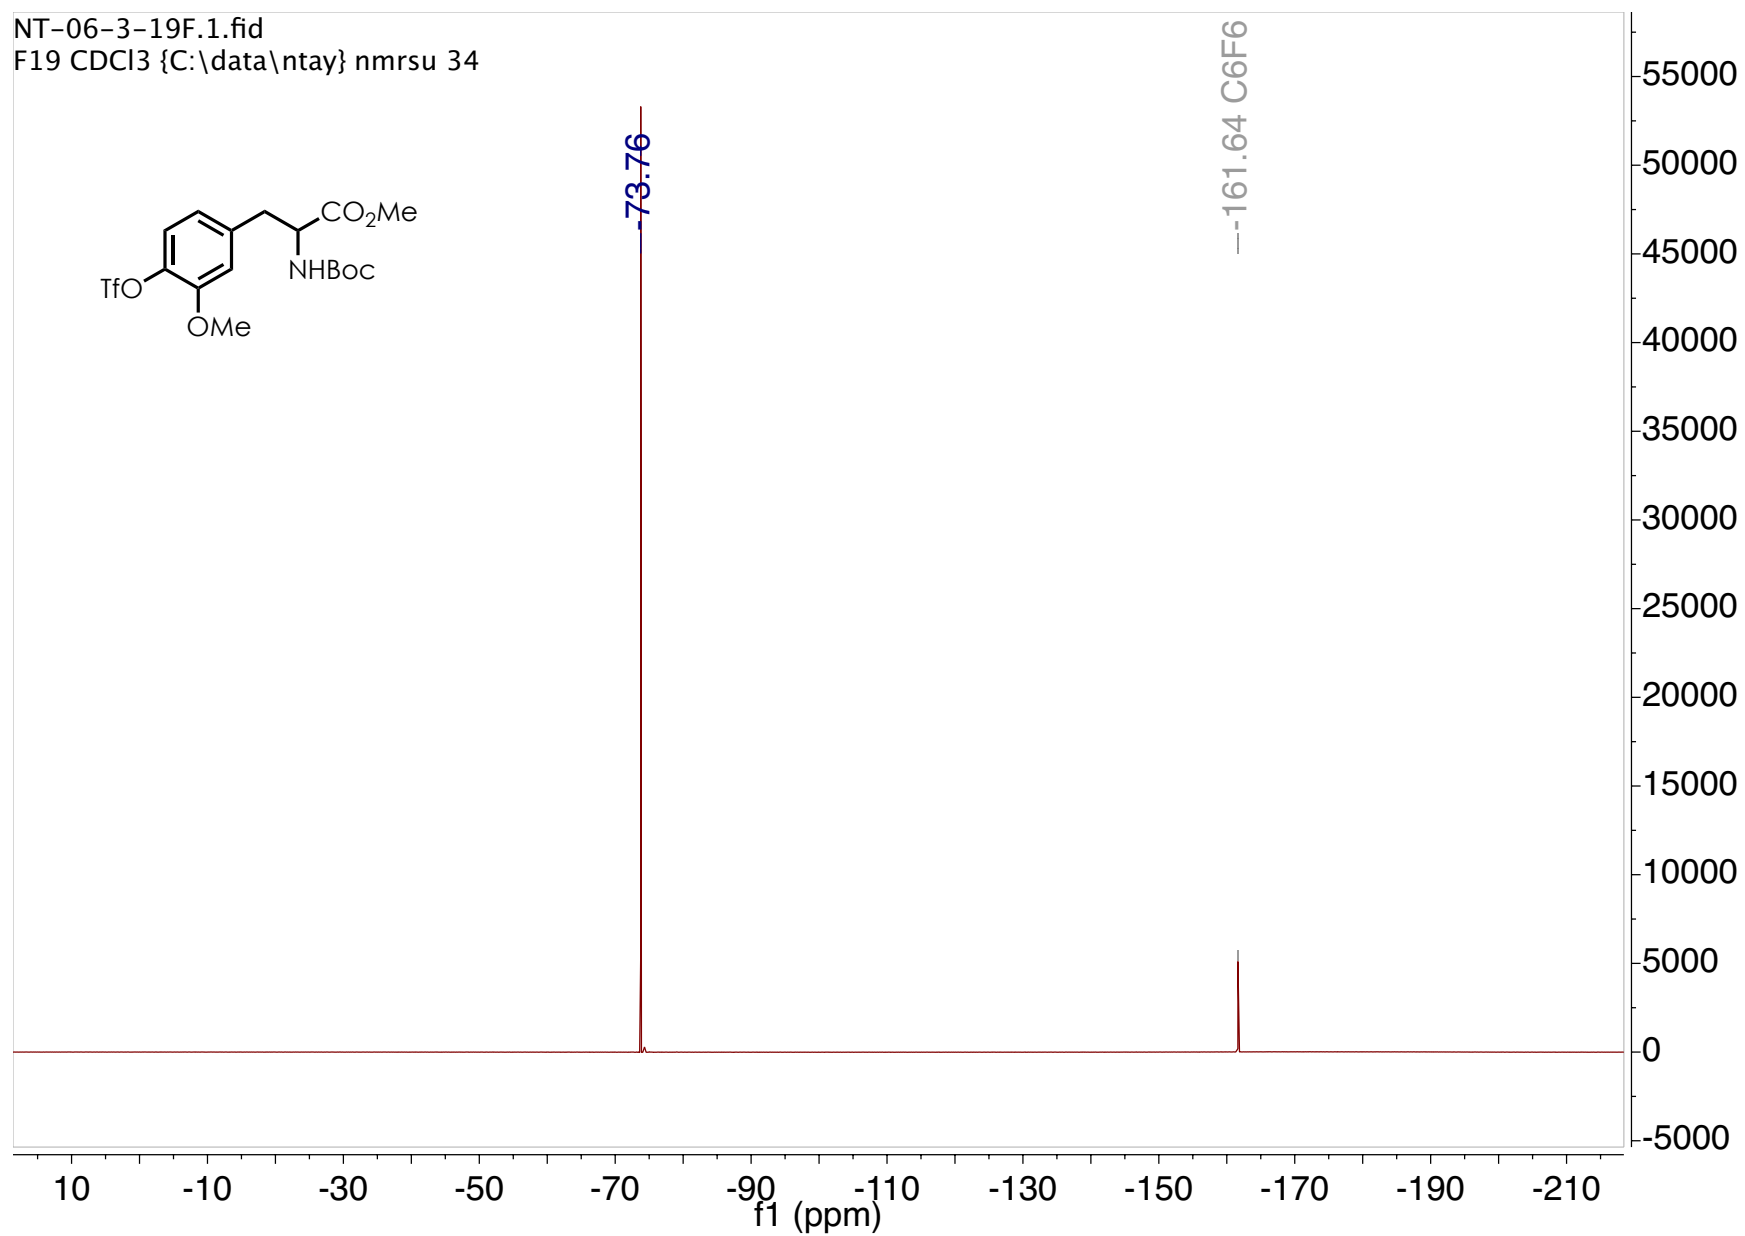

NT-04-238.1.fid  
Nicewicz  
5106082  
ntay  
NT-04-238

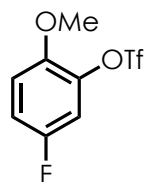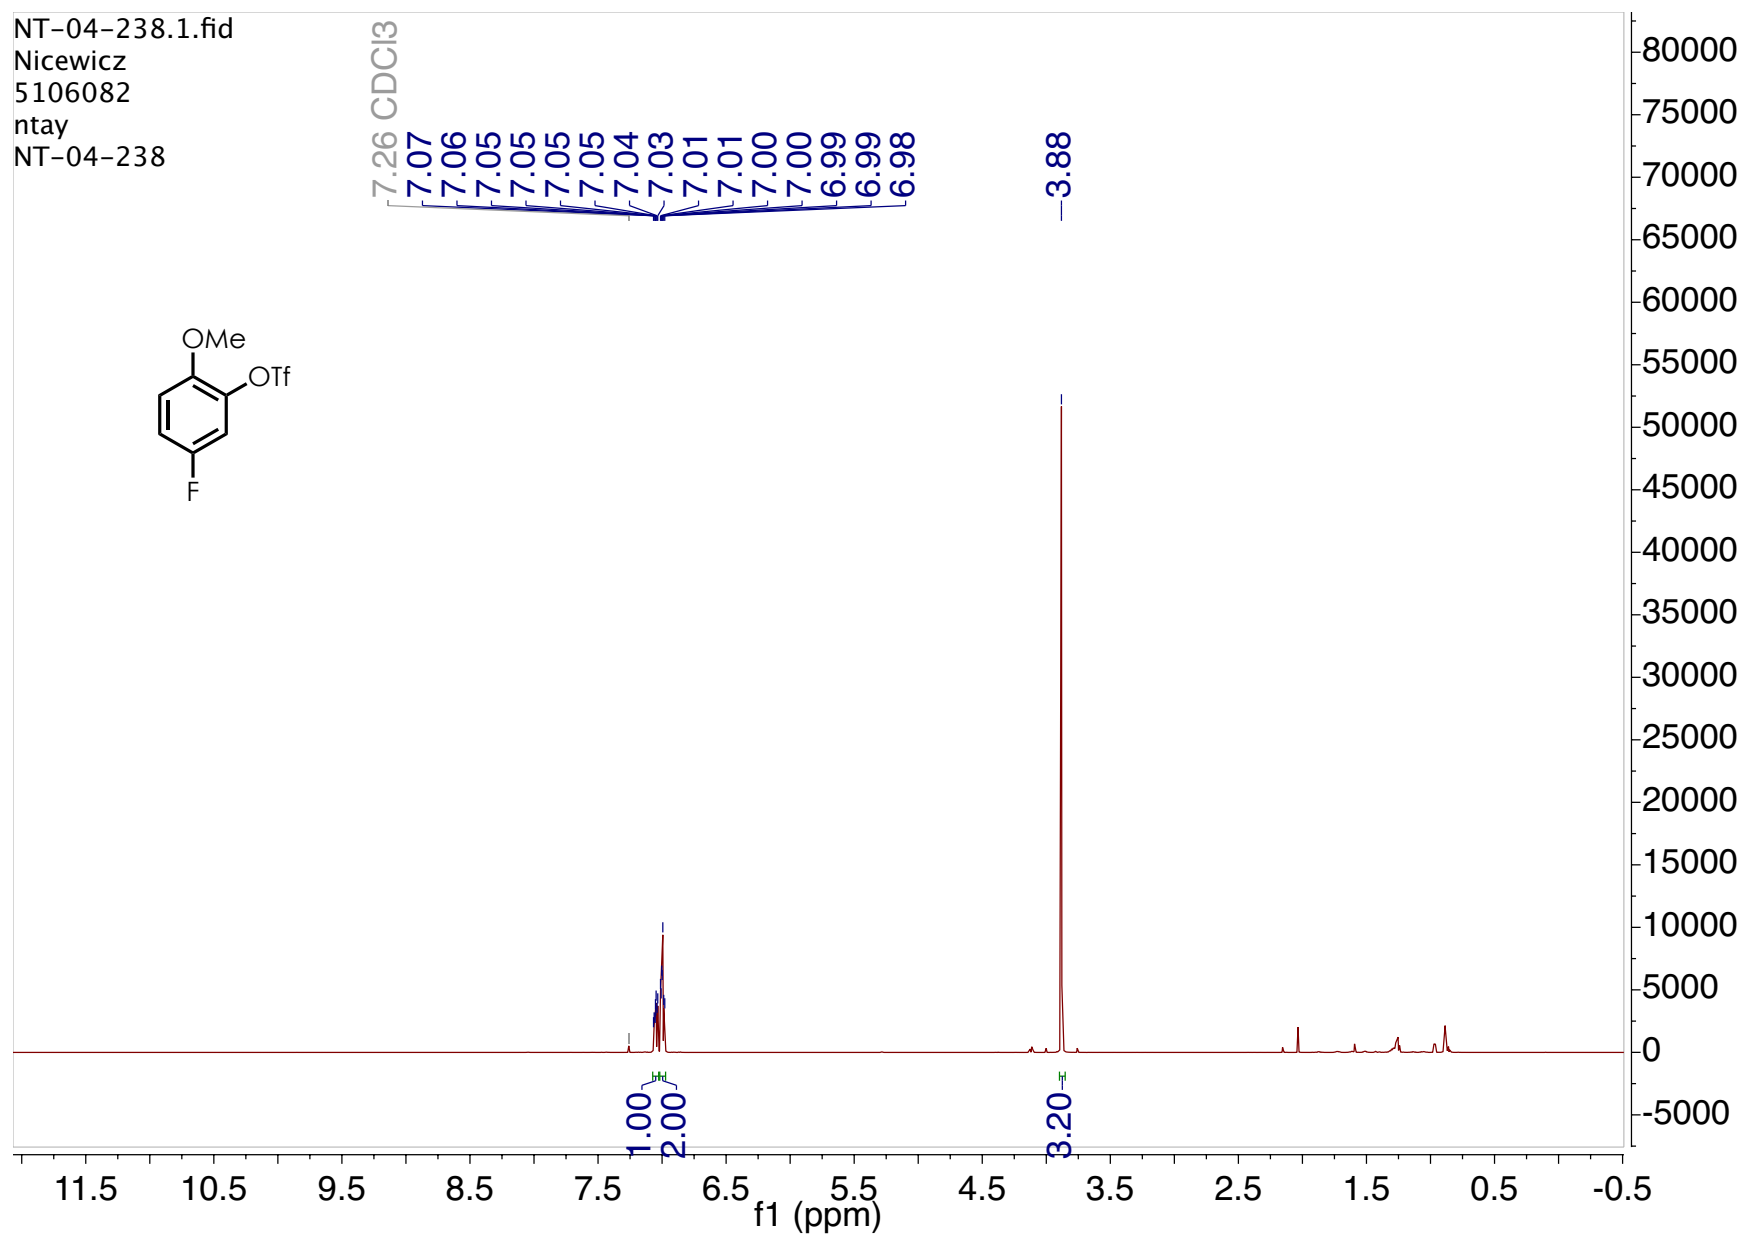

NT-04-238 2.2.fid  
Nicewicz  
5106082  
ntay  
NT-04-238

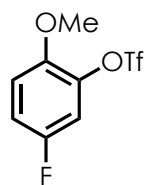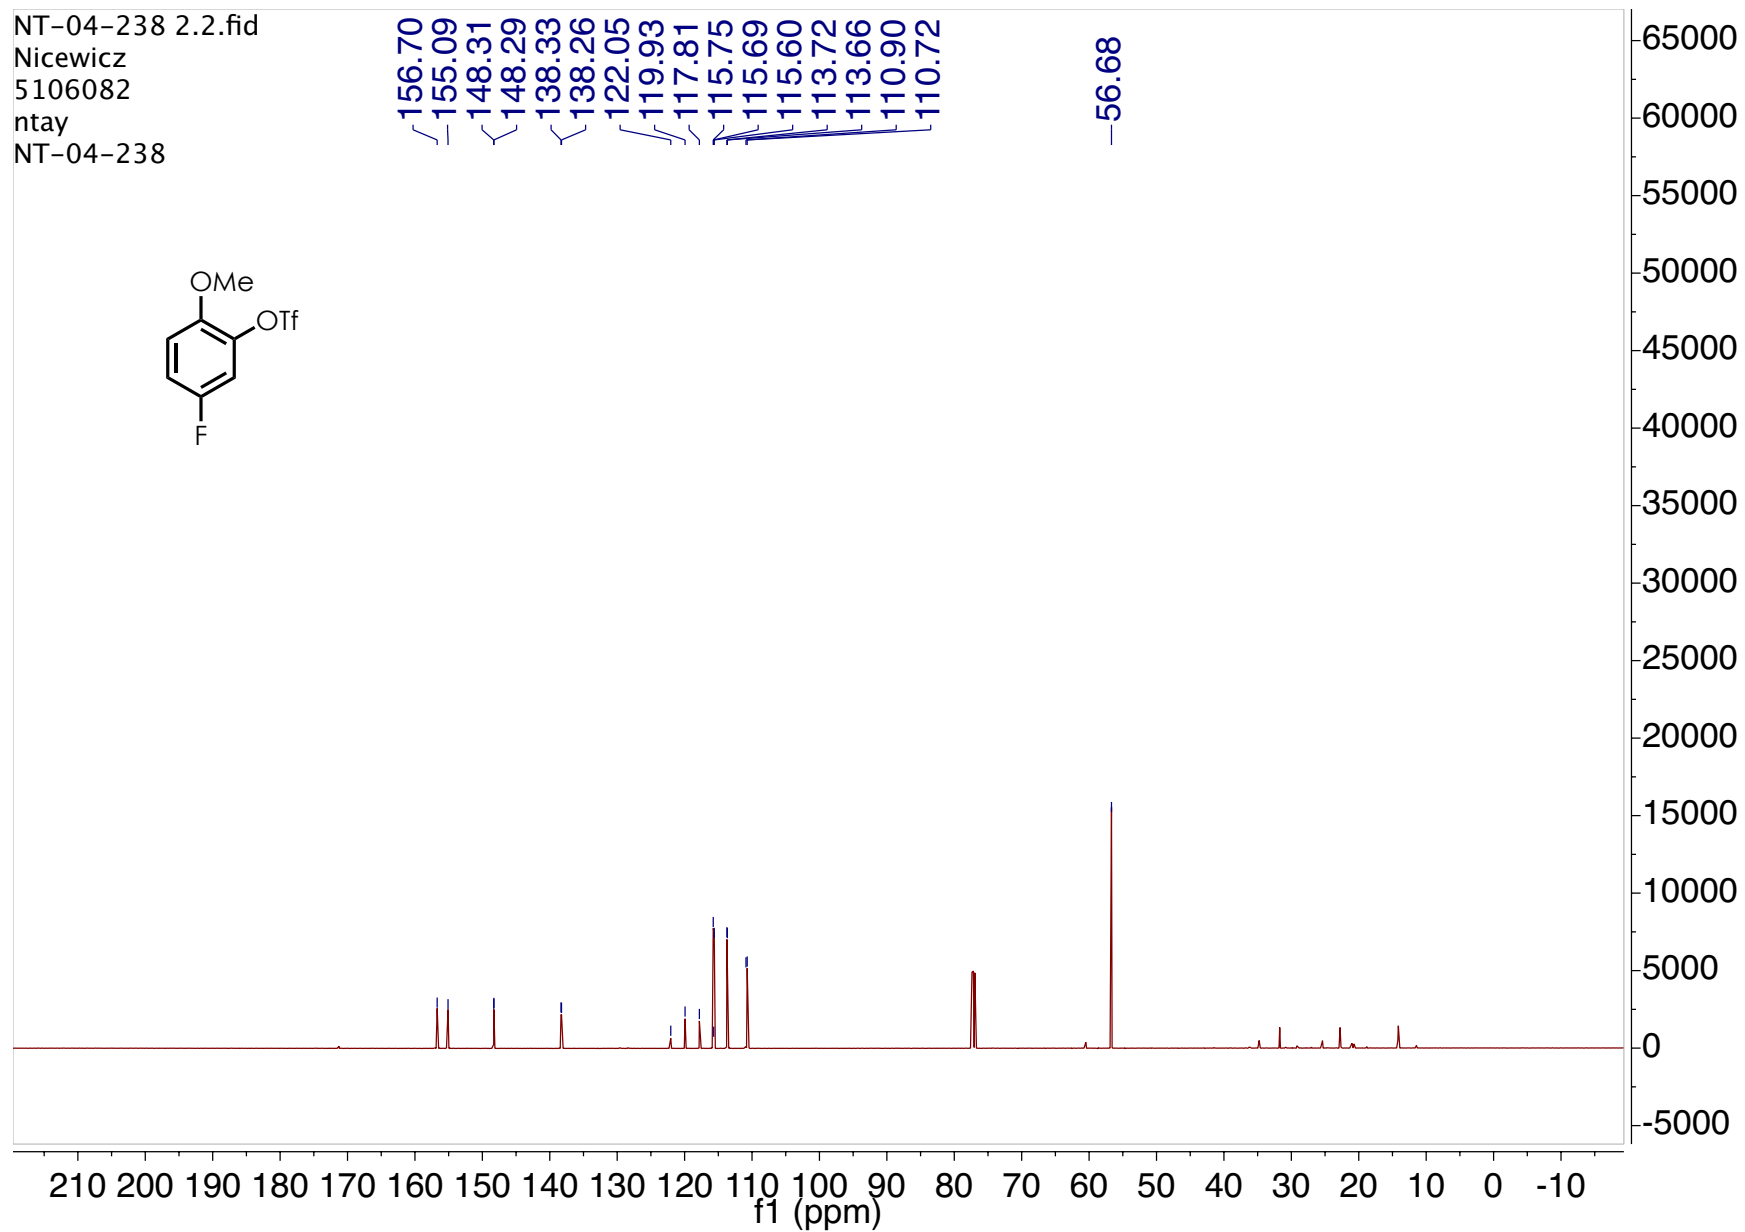

NT-04-238-19F 2.2.fid  
F19 CDCl3 {C:\data\ntay} nmrsu 33

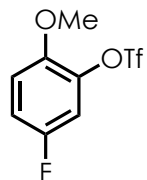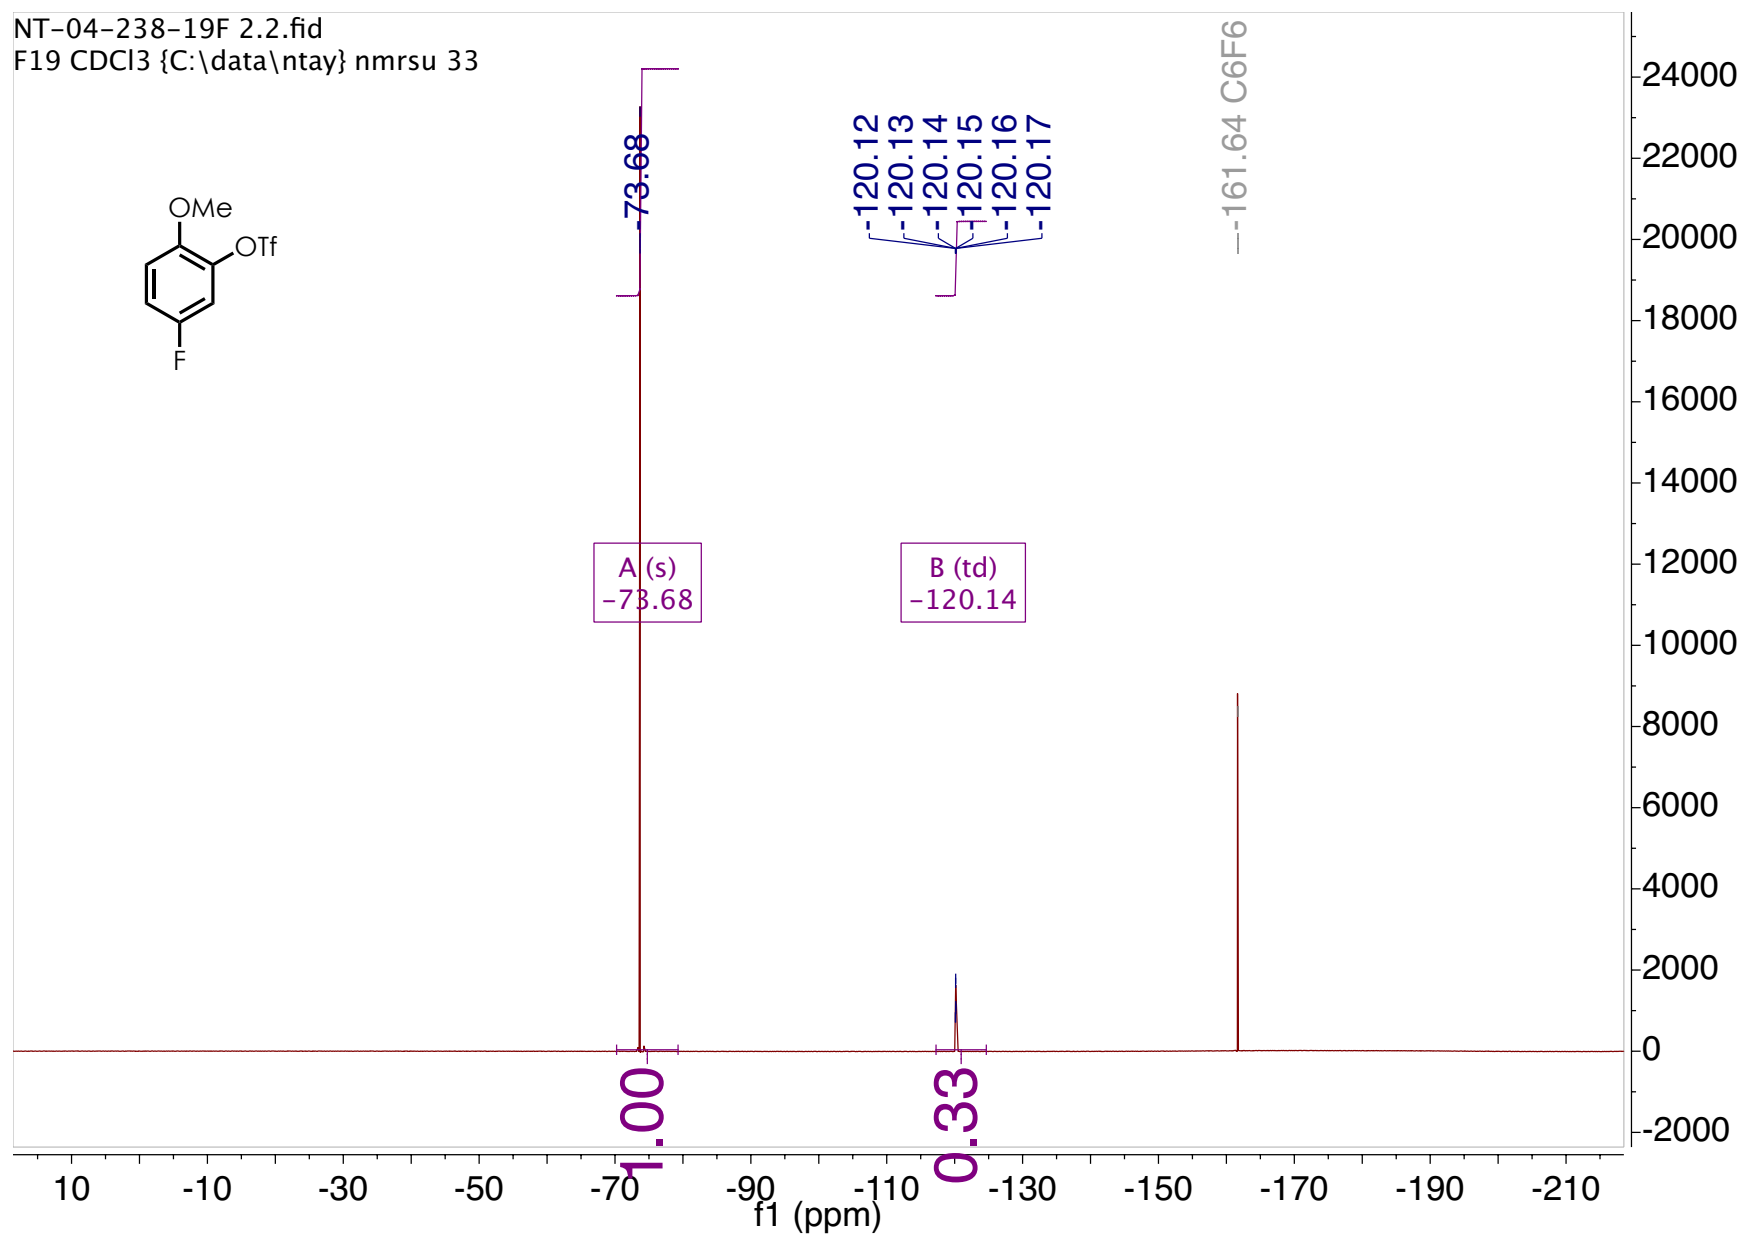

NT-05-83.2.fid  
Nicewicz  
C3308  
ntay  
NT-05-83

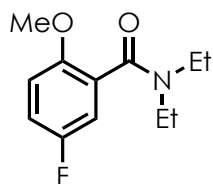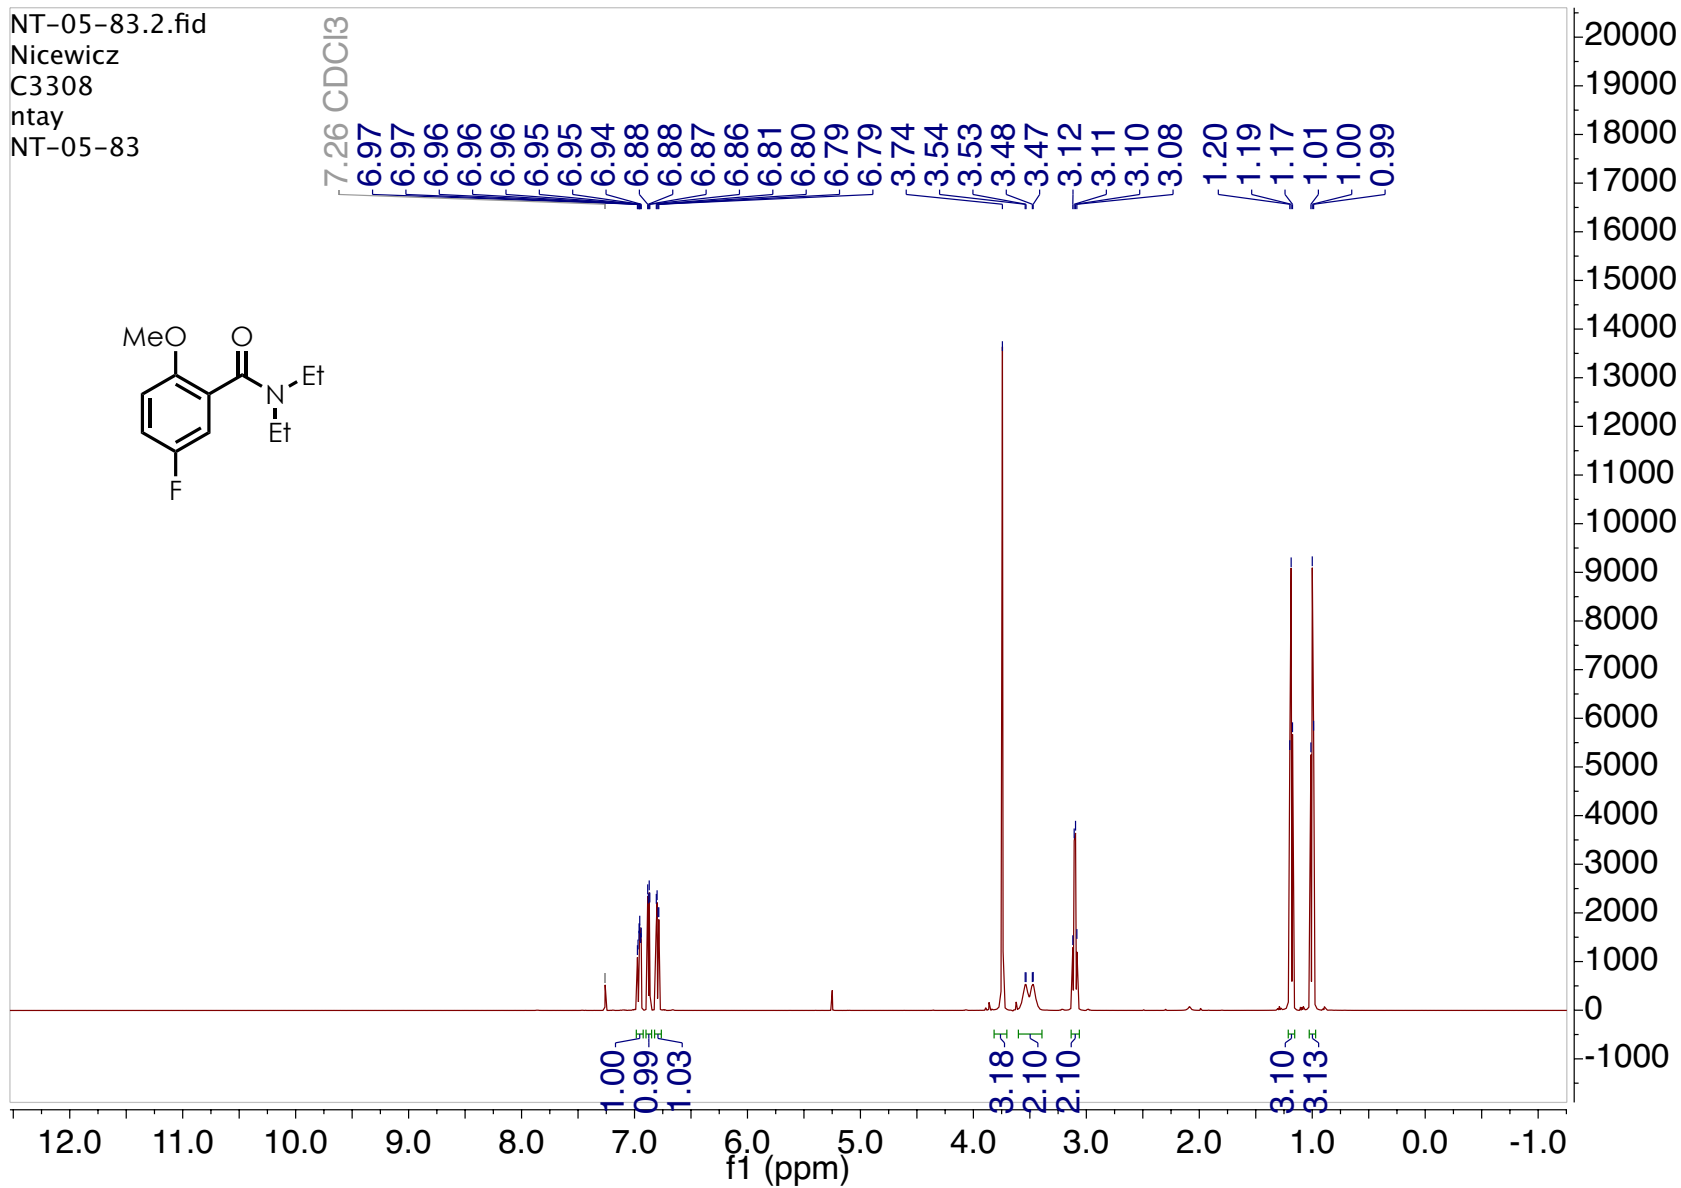

NT-05-83 2.3.fid  
Nicewicz  
C3308  
ntay  
NT-05-83

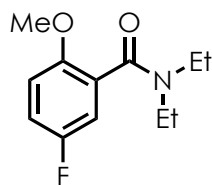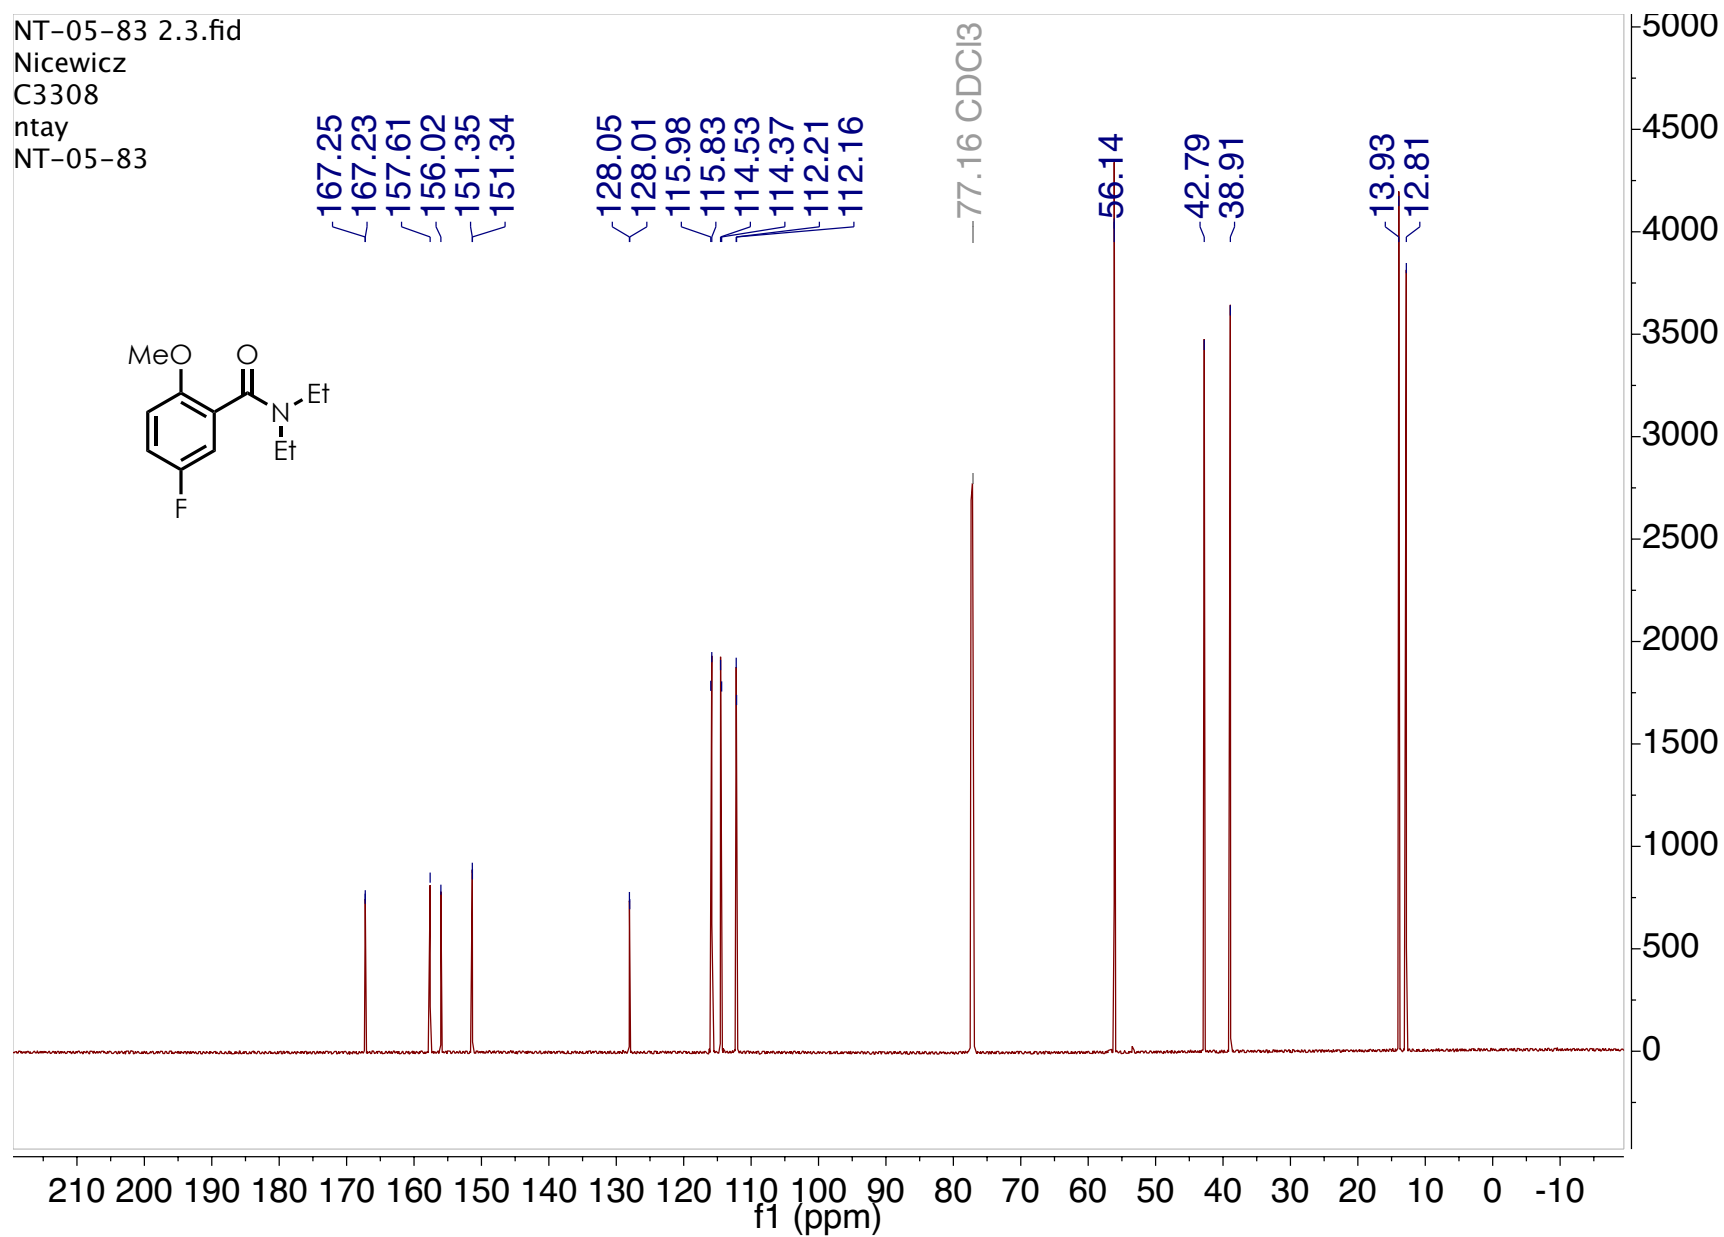

NT-05-83-19F.2.fid

F19 CDCl<sub>3</sub> {C:\data\ntay} nmrsu 1

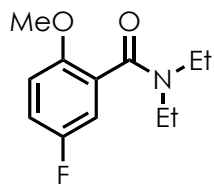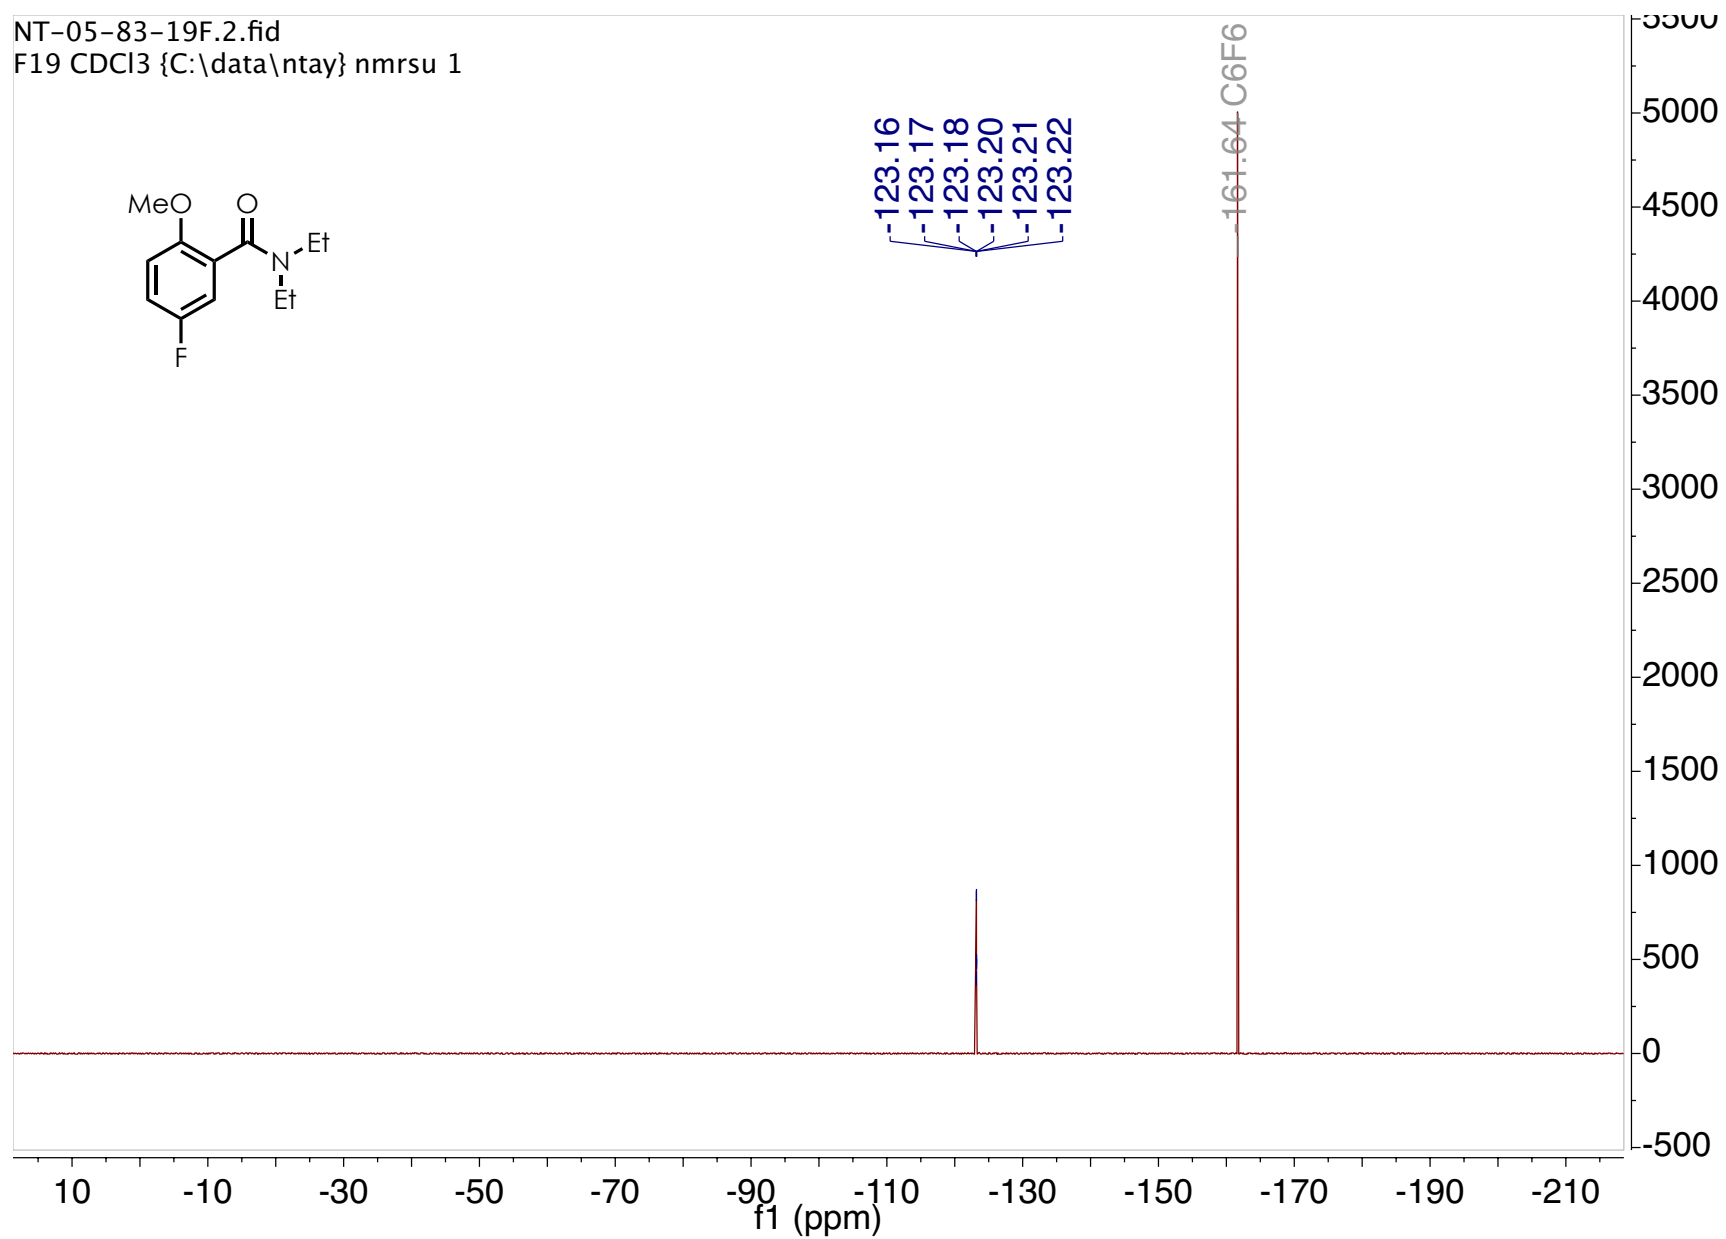

NT-05-78.1.fid  
Nicewicz  
C3308  
ntay  
NT-05-78

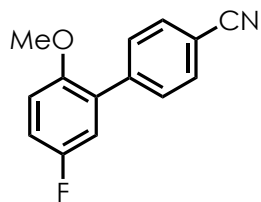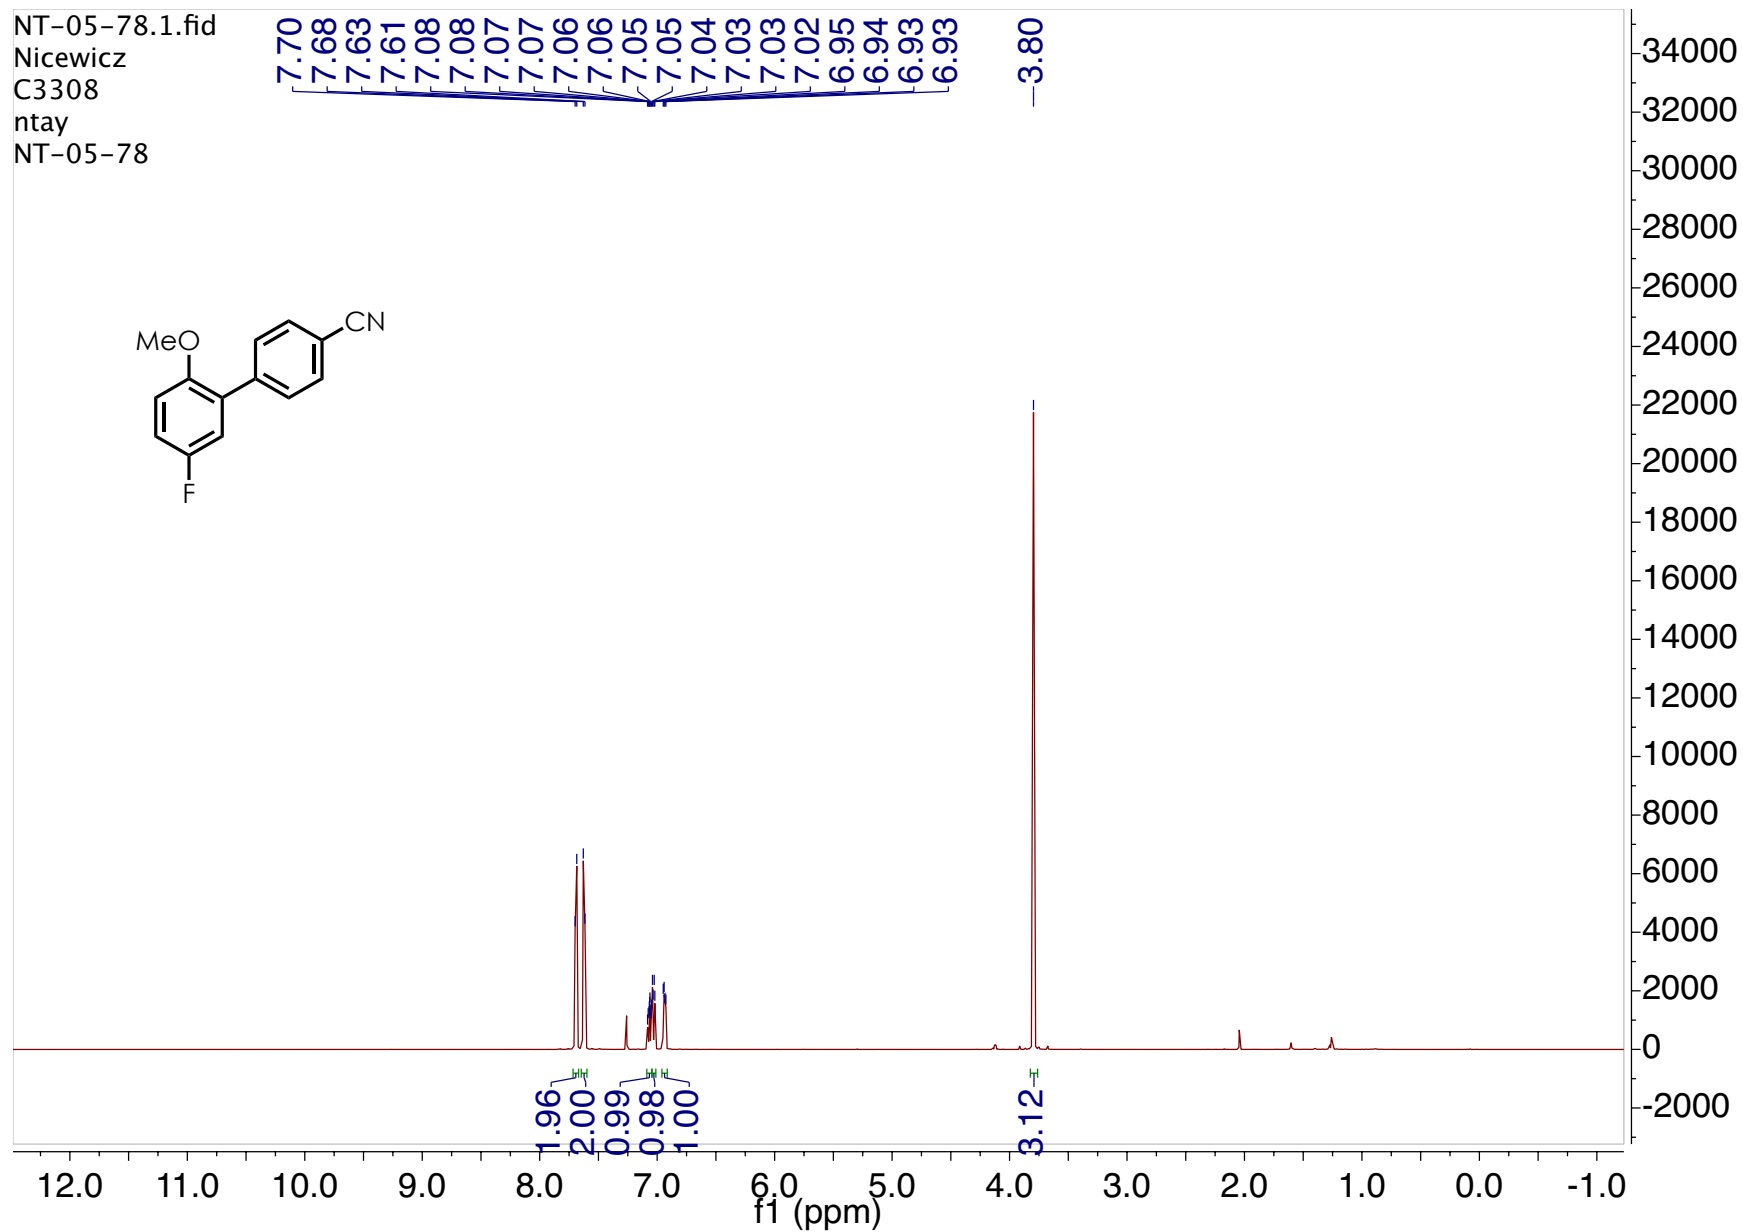

NT-05-78 2.2.fid  
Nicewicz  
C3308  
ntay  
NT-05-78

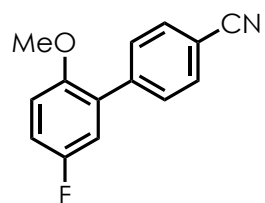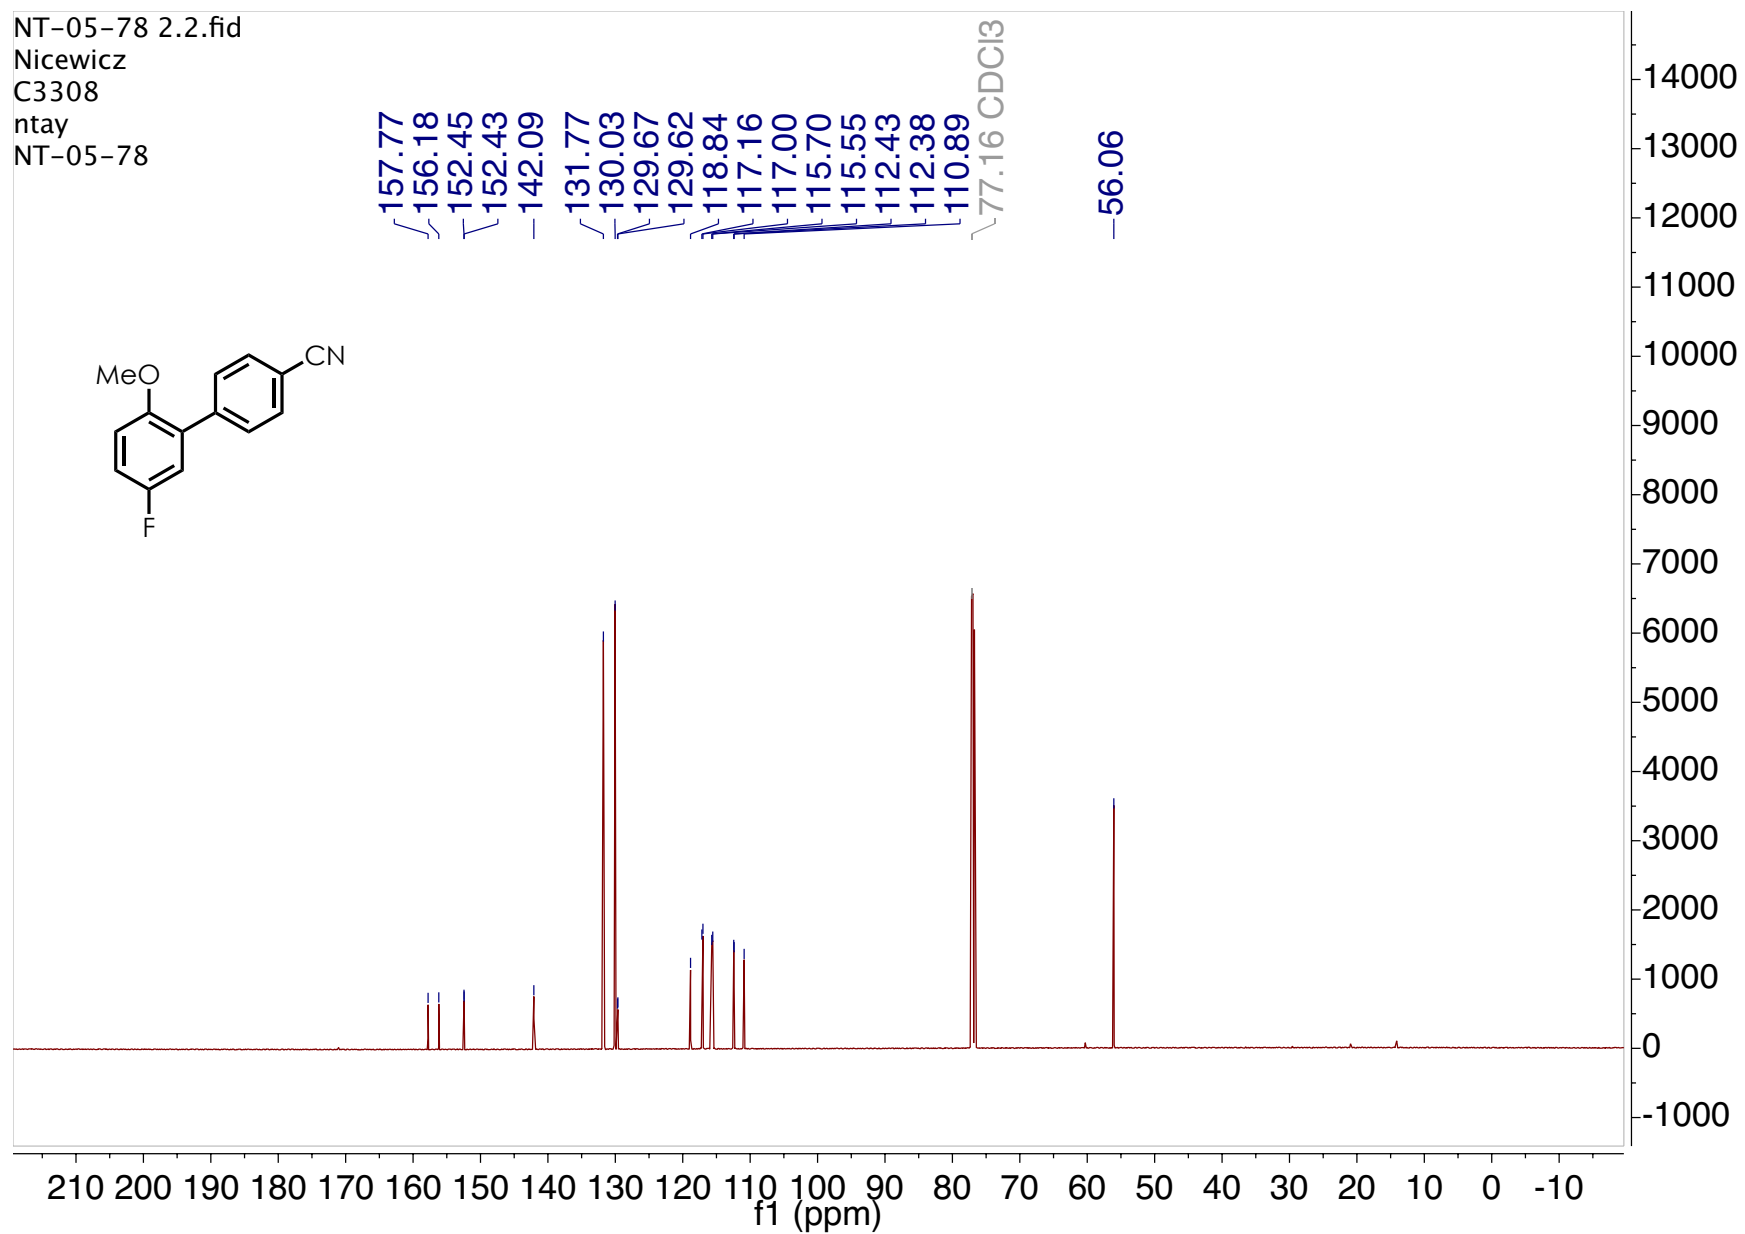

NT-05-78-19F.1.fid

F19 CDCl<sub>3</sub> {C:\data\ntay} nmrsu 4

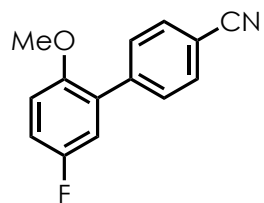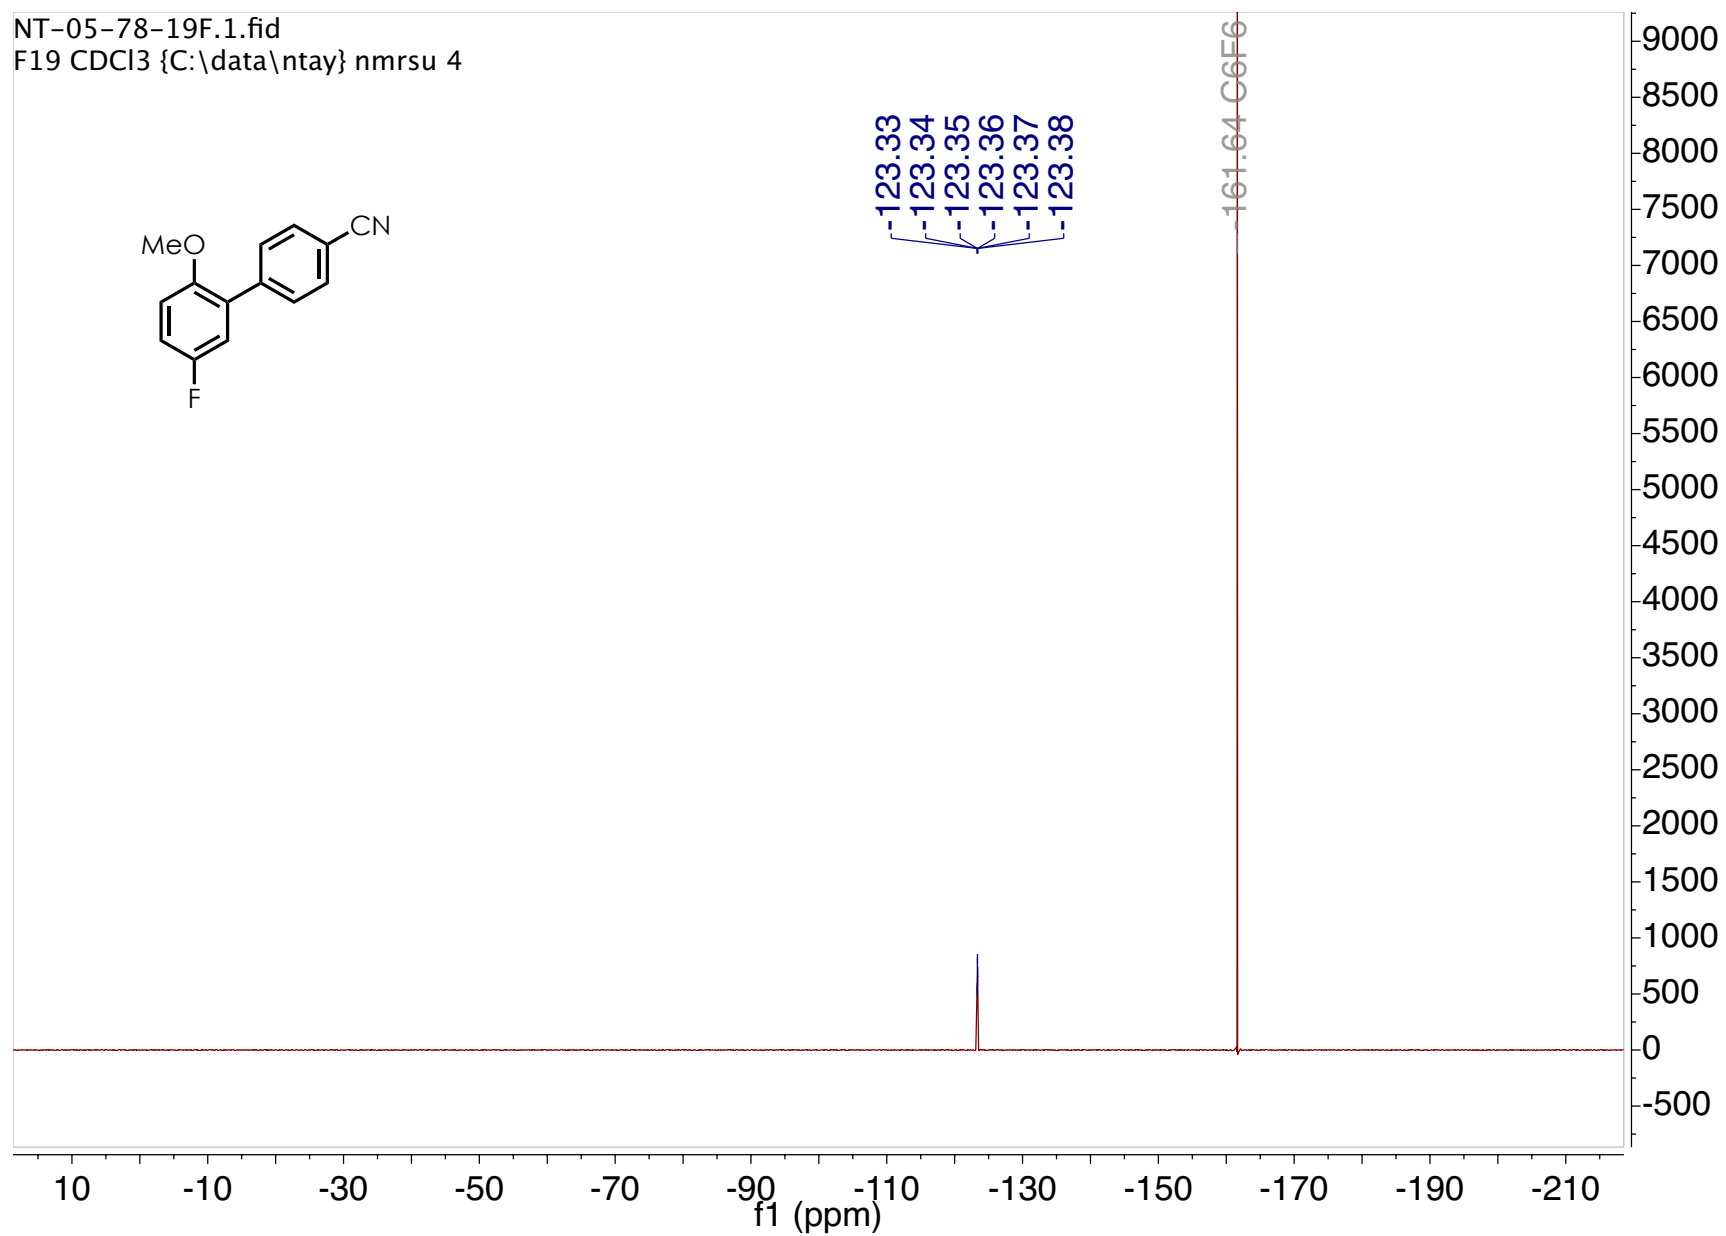

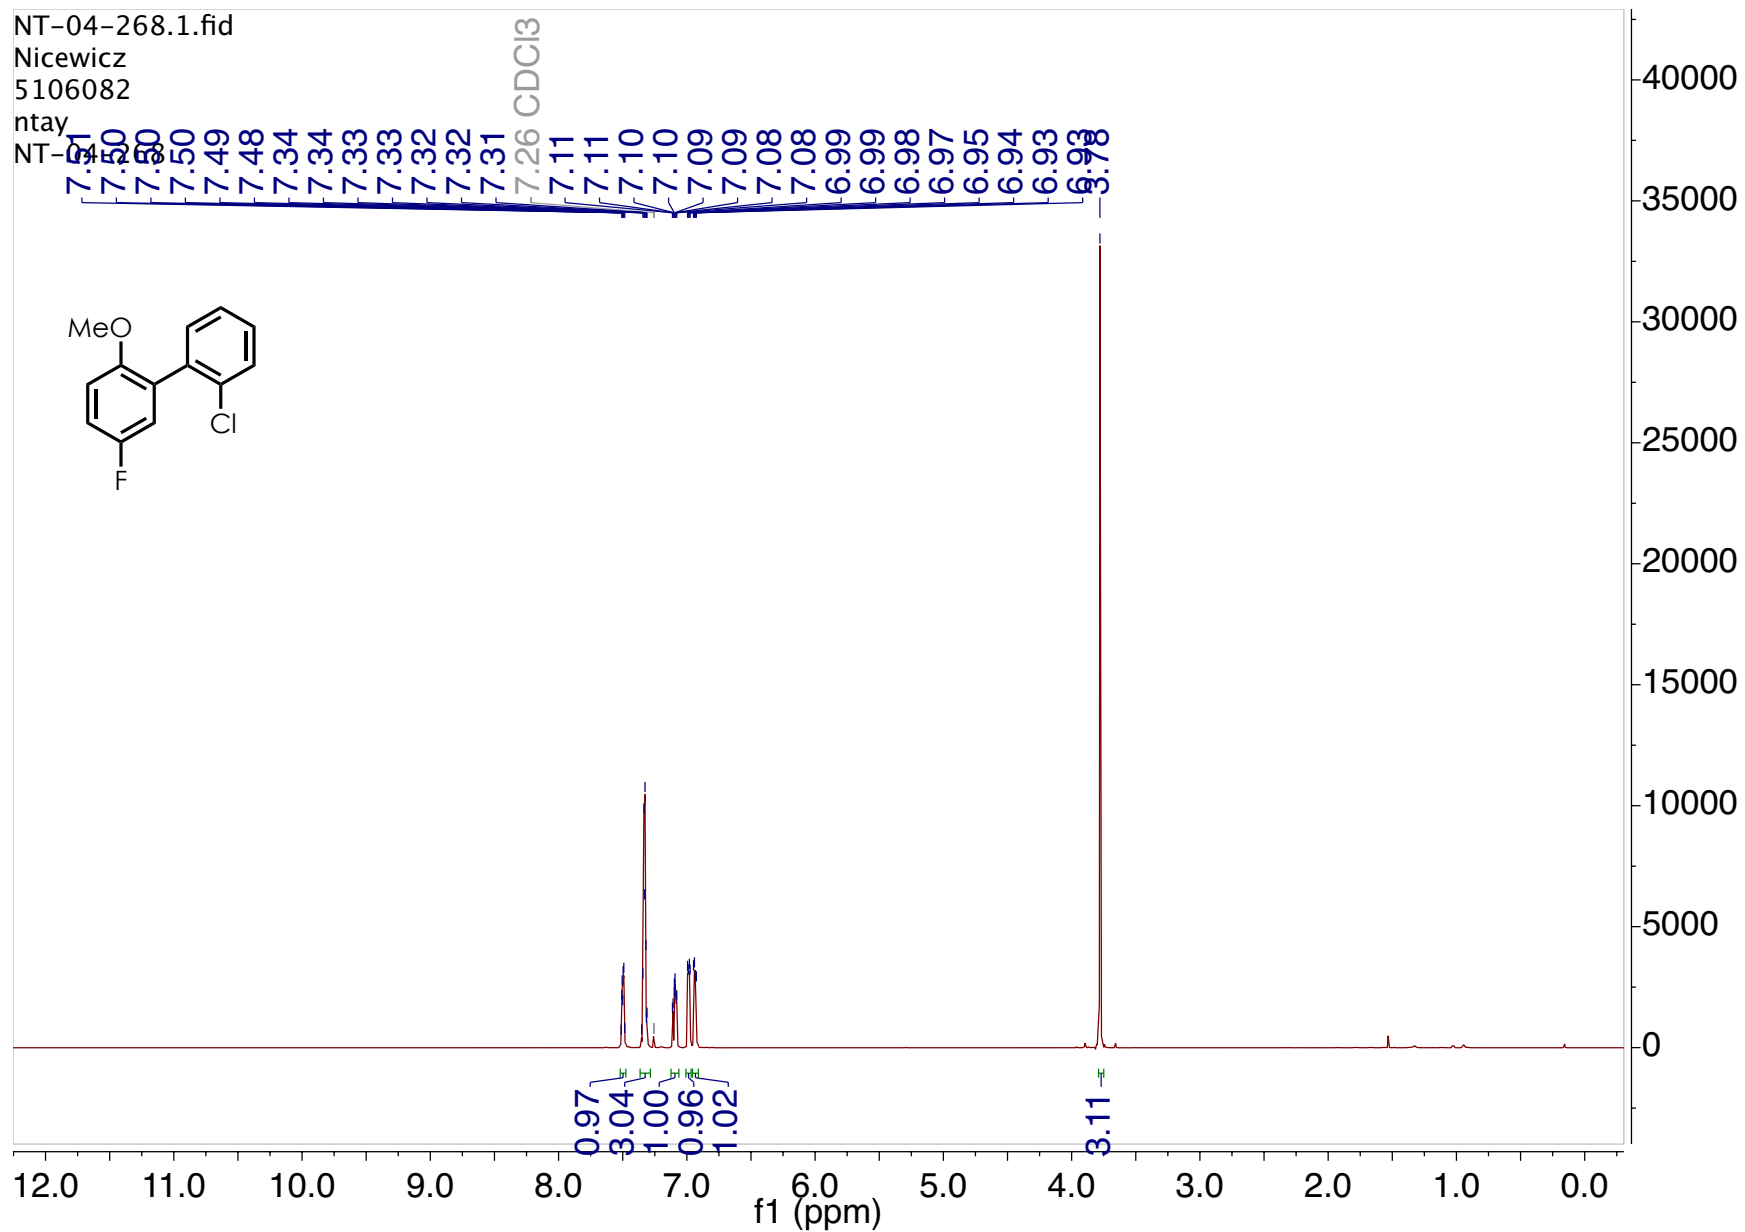

NT-04-268 2.2.fid

Nicewicz

5106082

ntay

NT-04-268

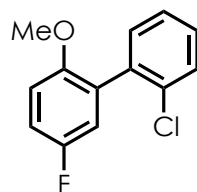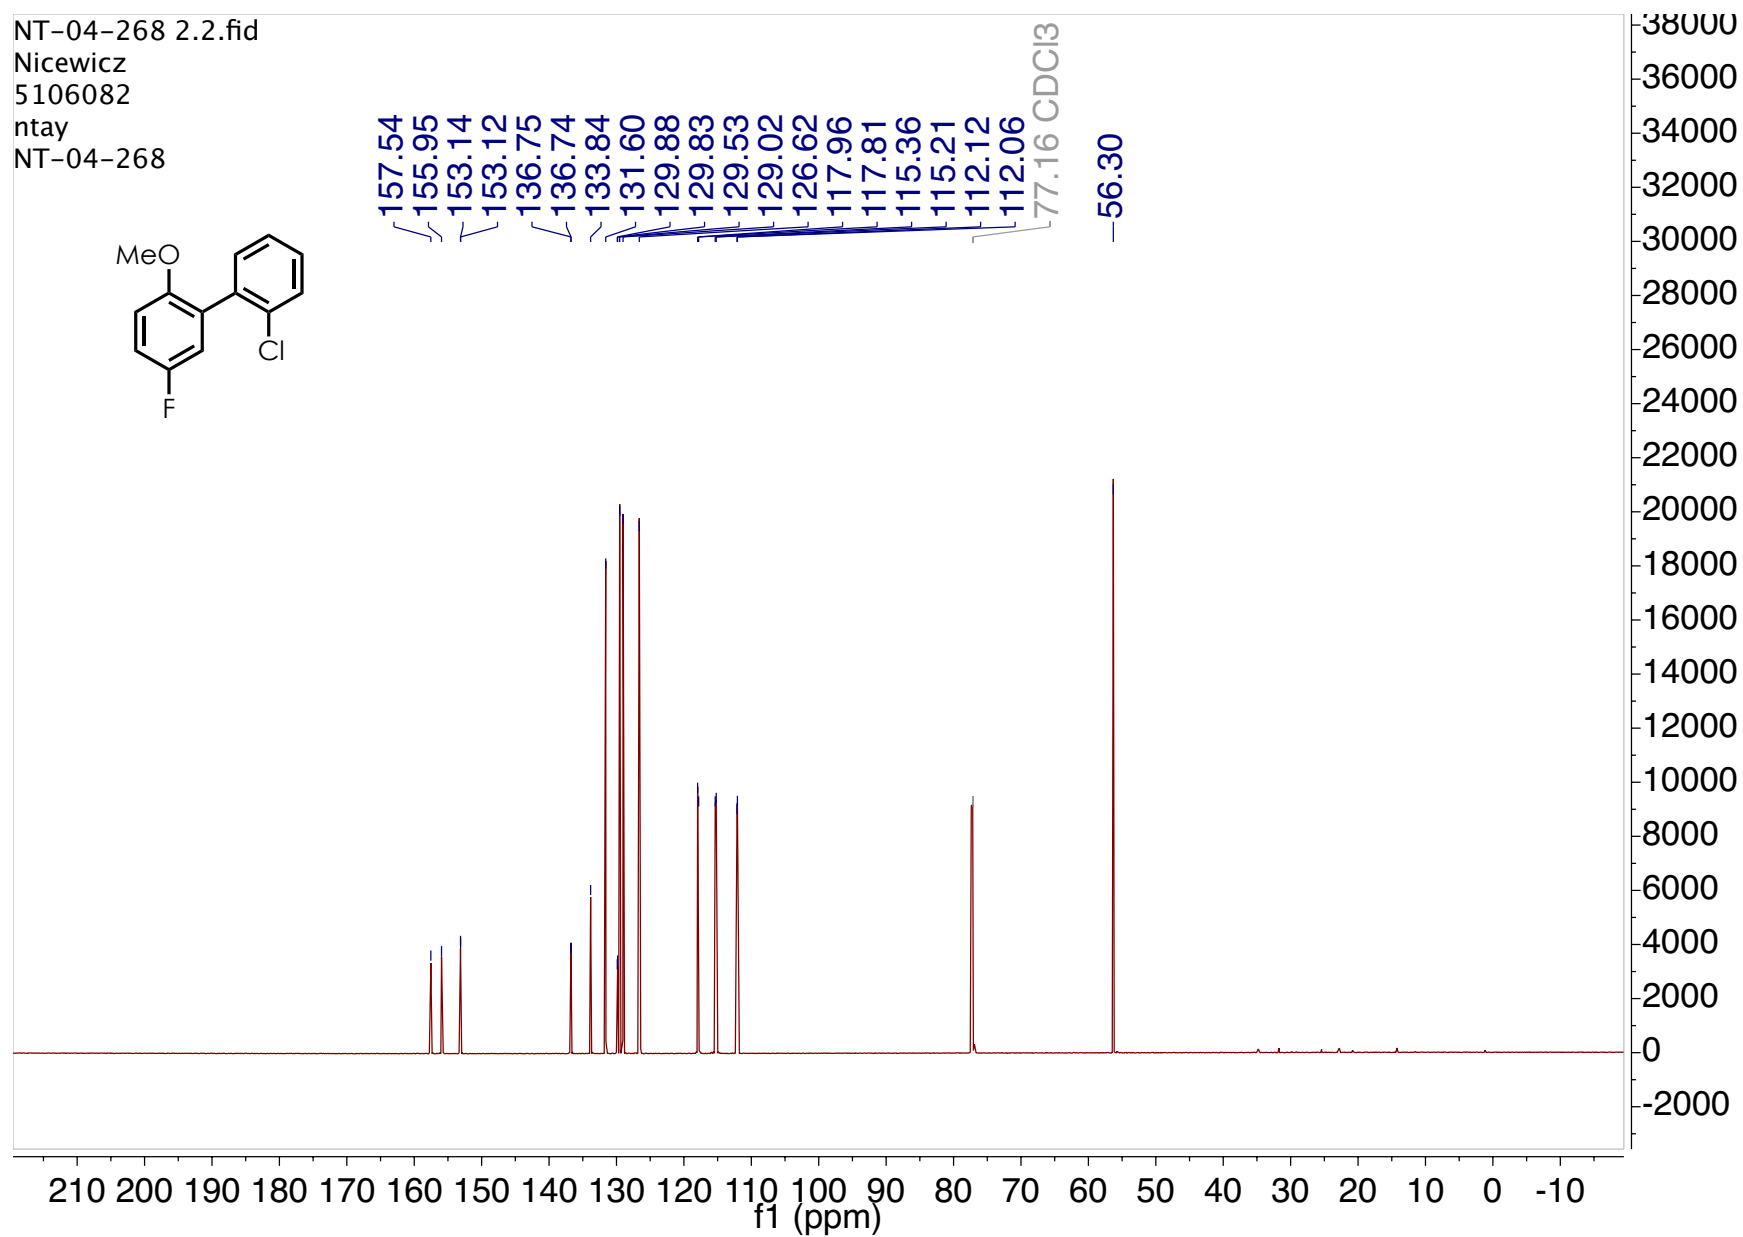

NT-04-268-19F 2.2.fid  
F19 CDCl3 {C:\data\ntay} nmrsu 3

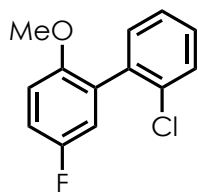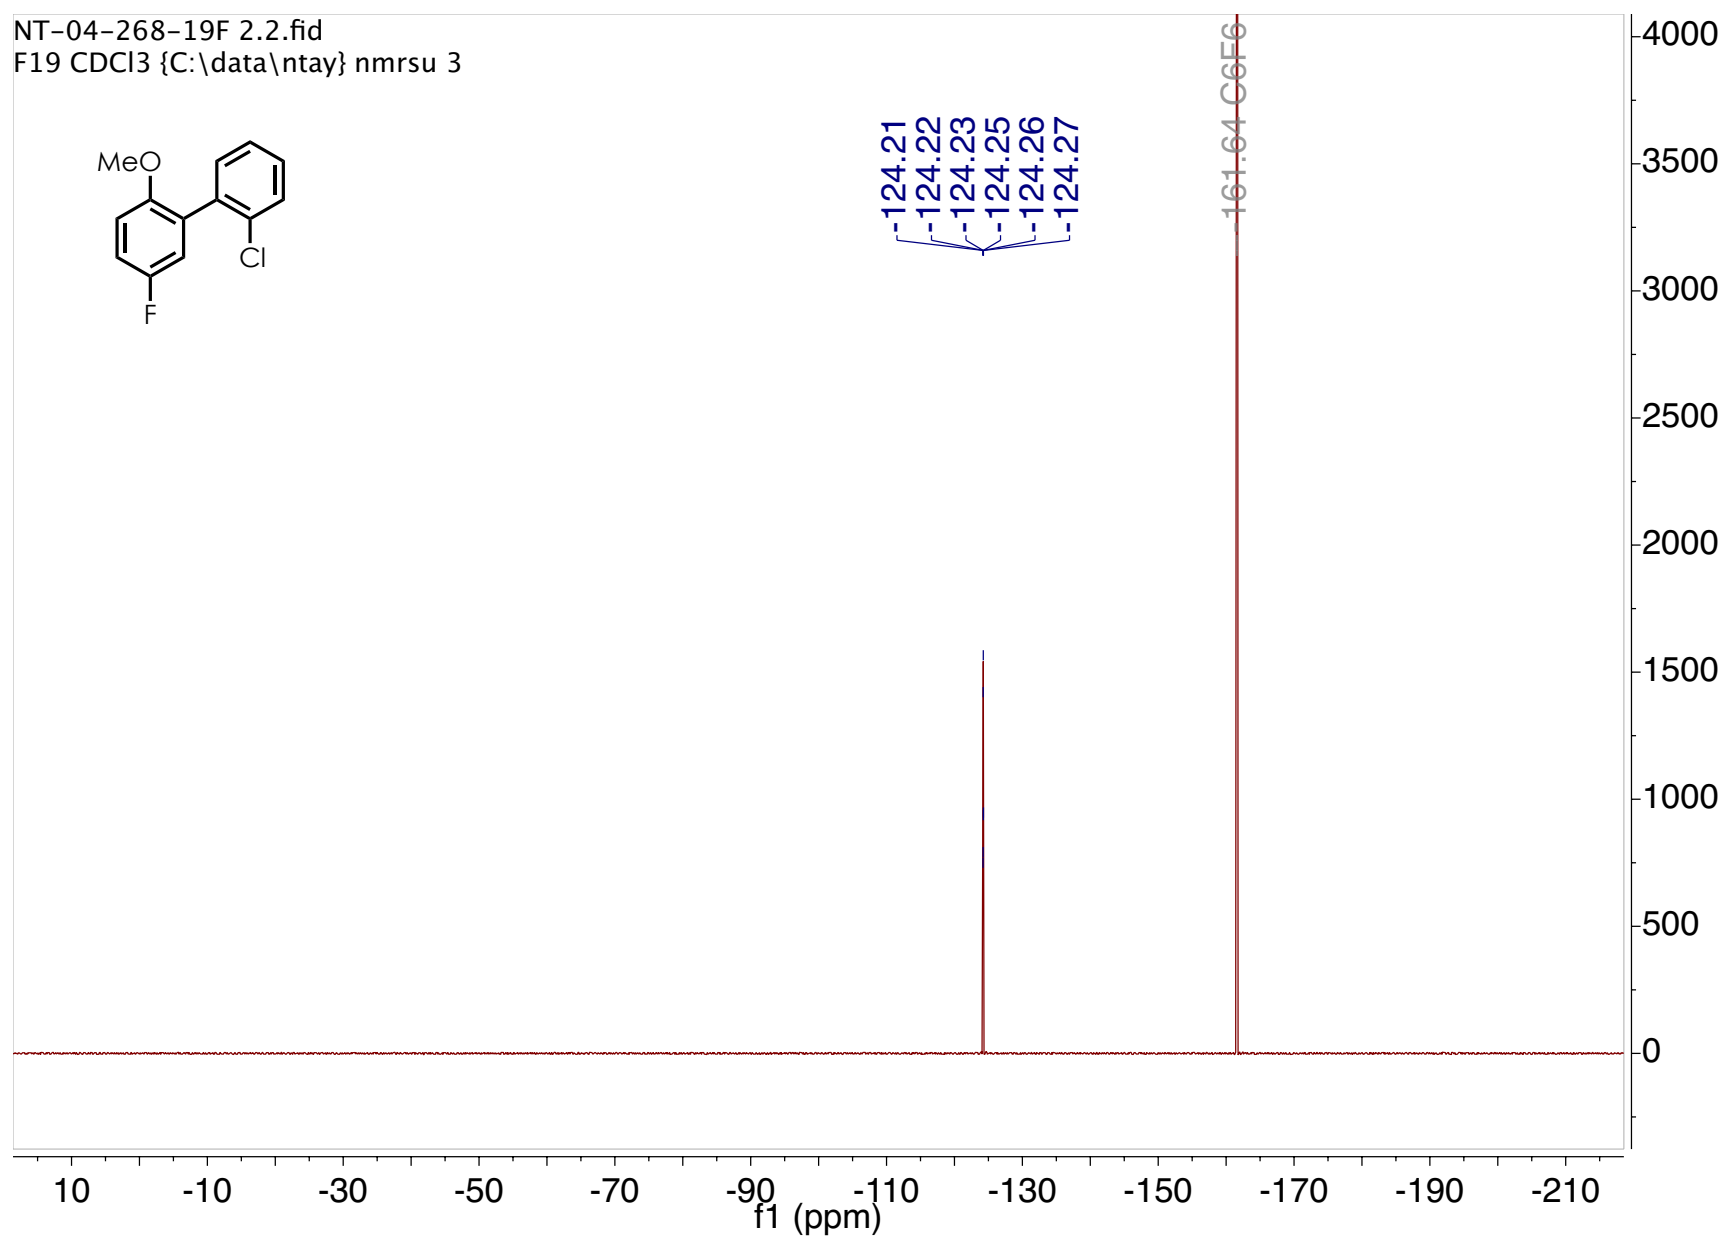

NT-05-202.1.fid  
Nicewicz  
C3308  
ntay  
NT-05-202

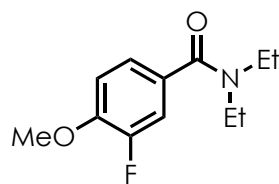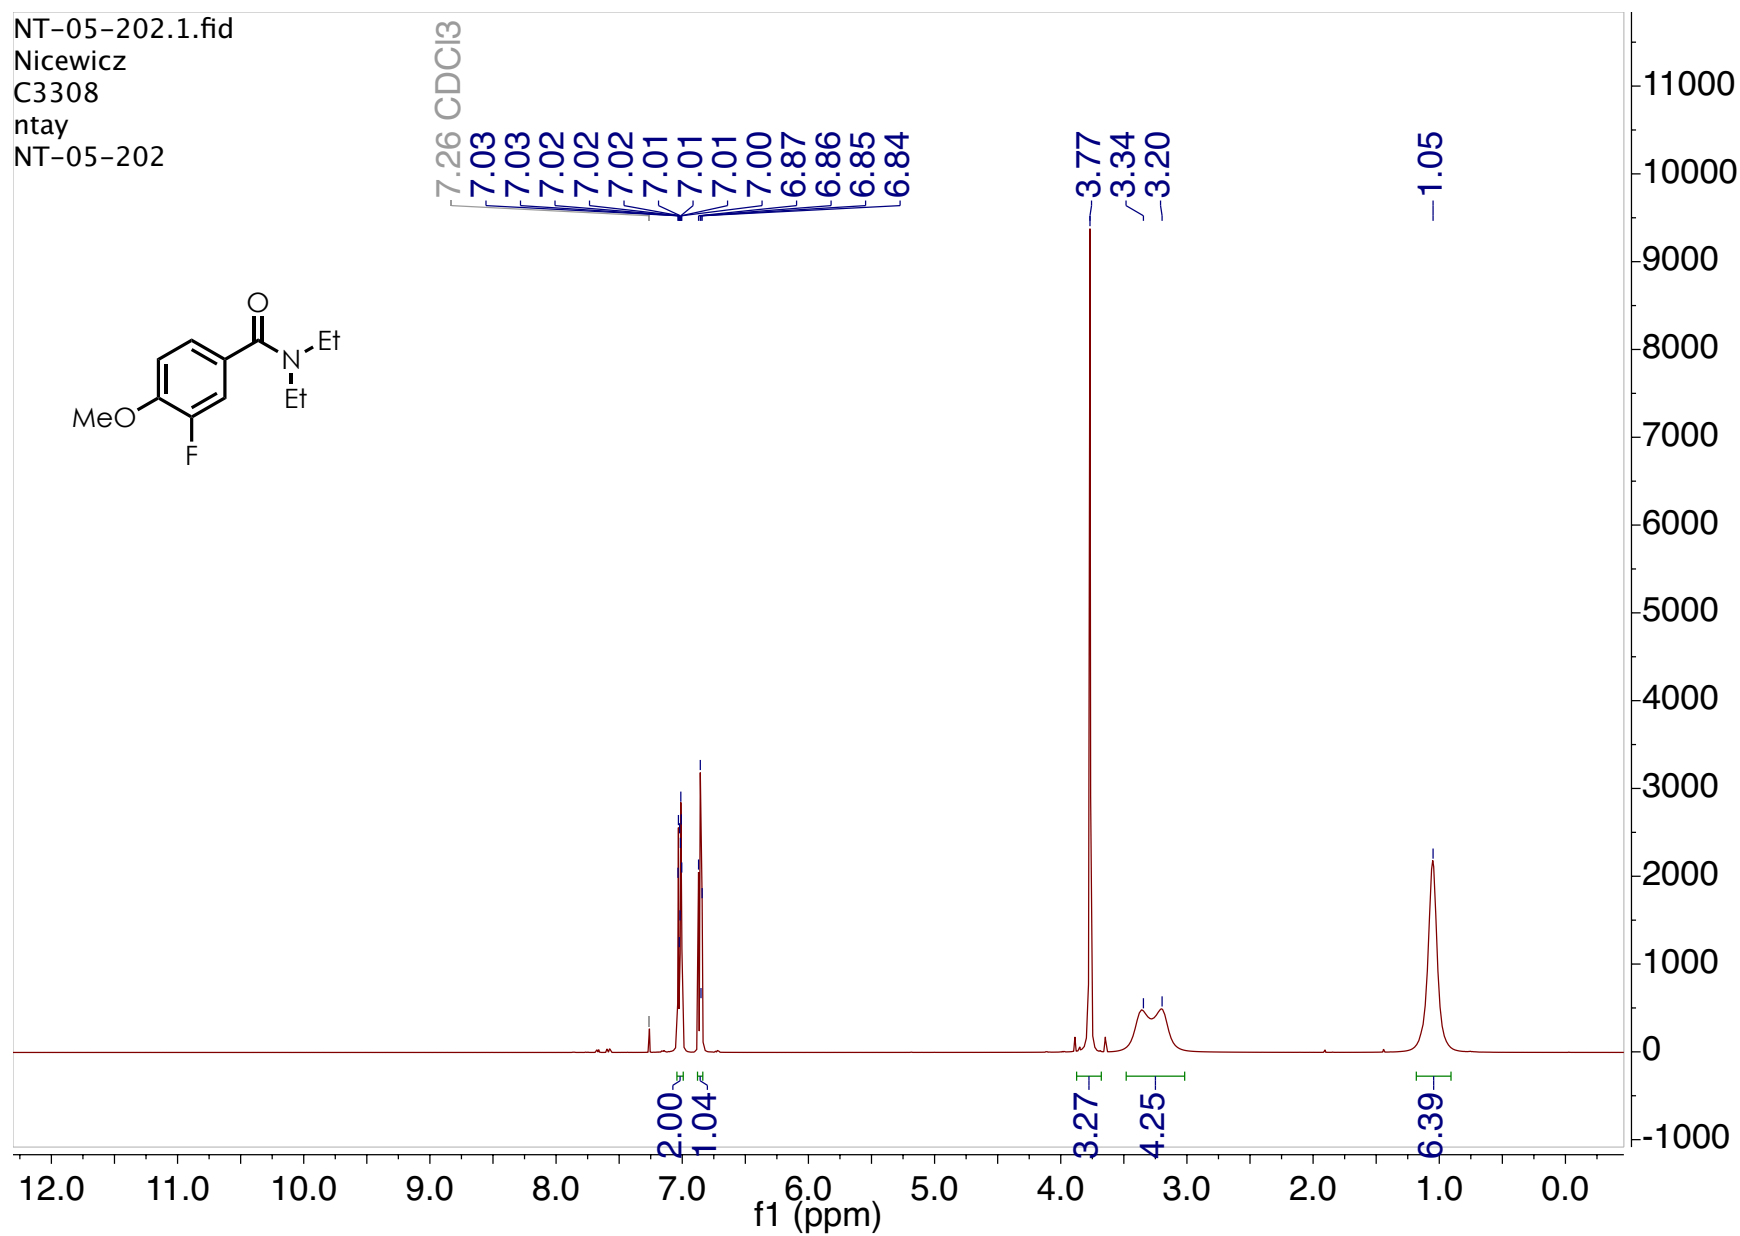

NT-05-202 2.2.fid  
Nicewicz  
C3308  
ntay  
NT-05-202

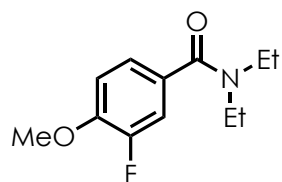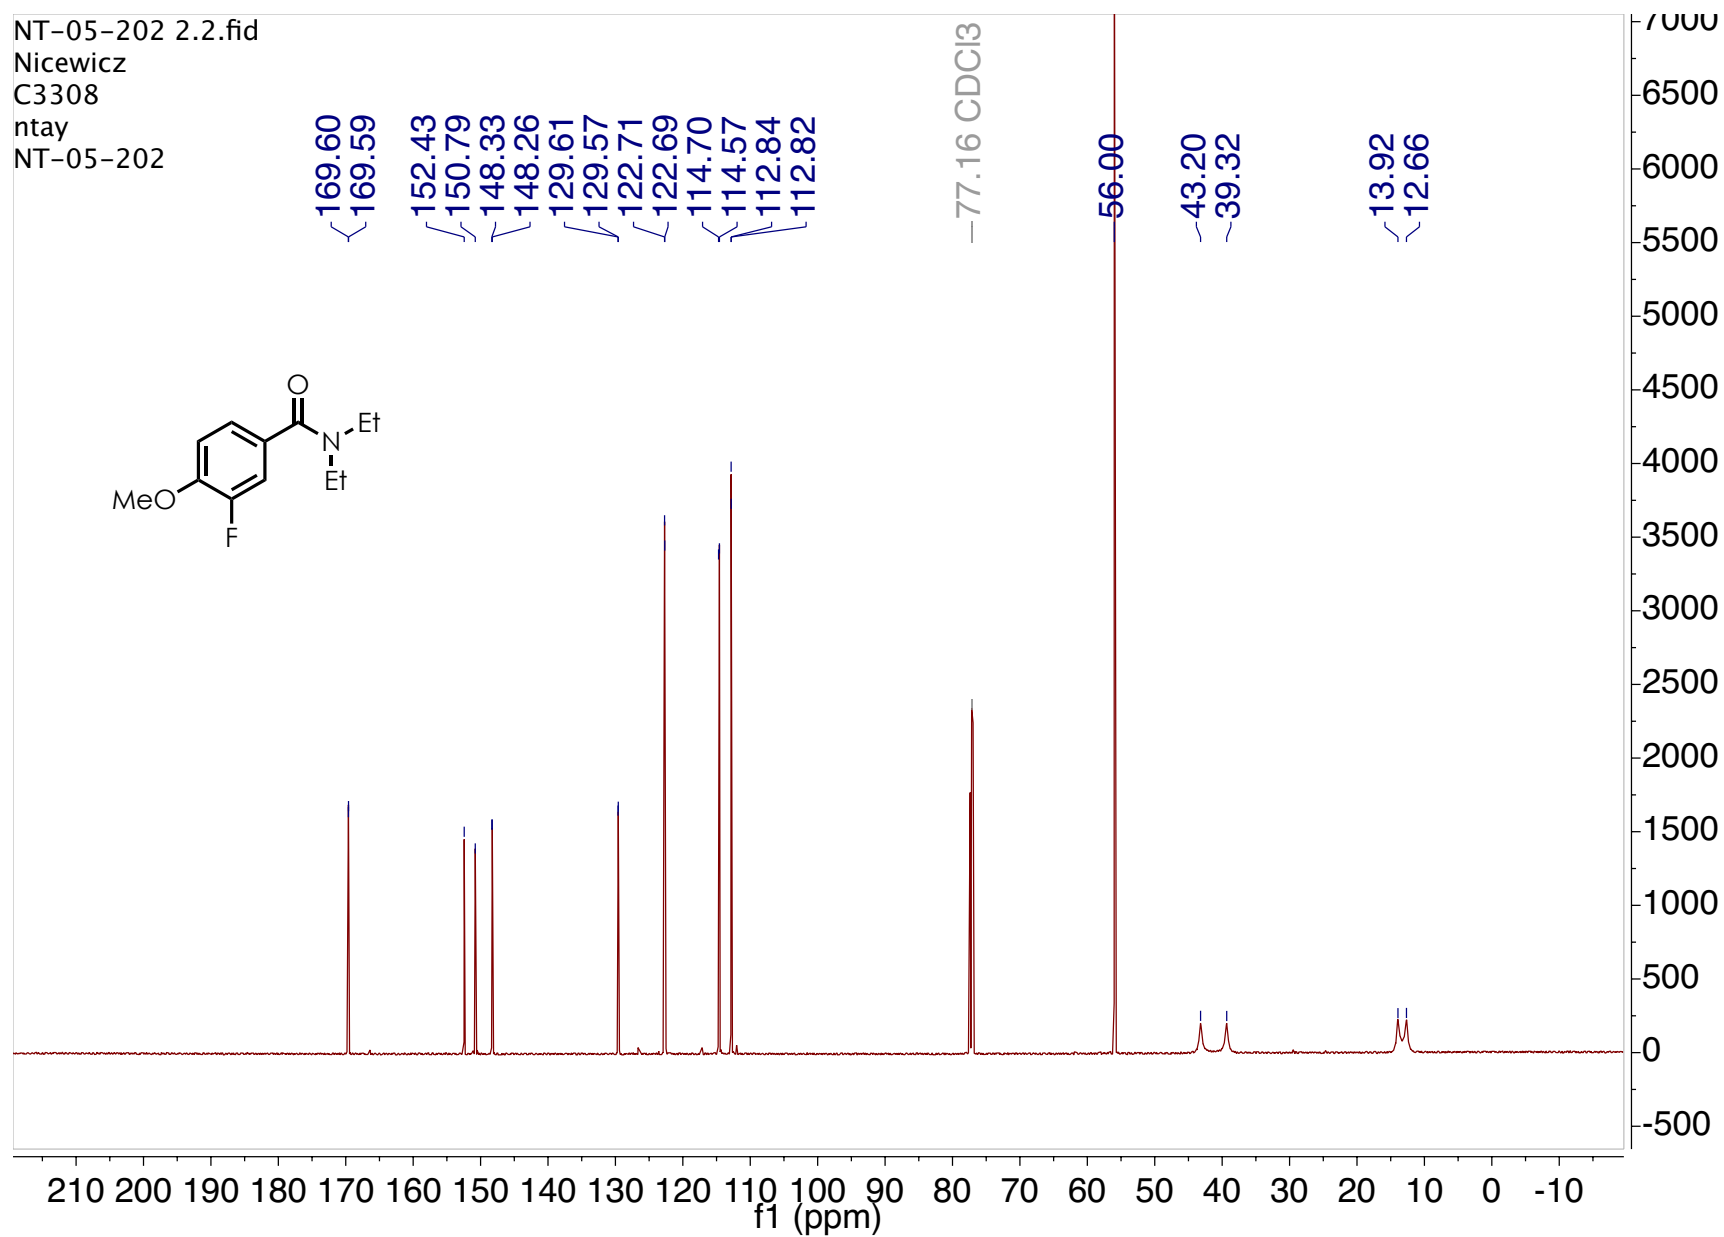

NT-05-202-19F 2.1.fid  
F19 CDCl3 {C:\data\ntay} nmrsu 2

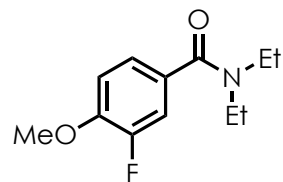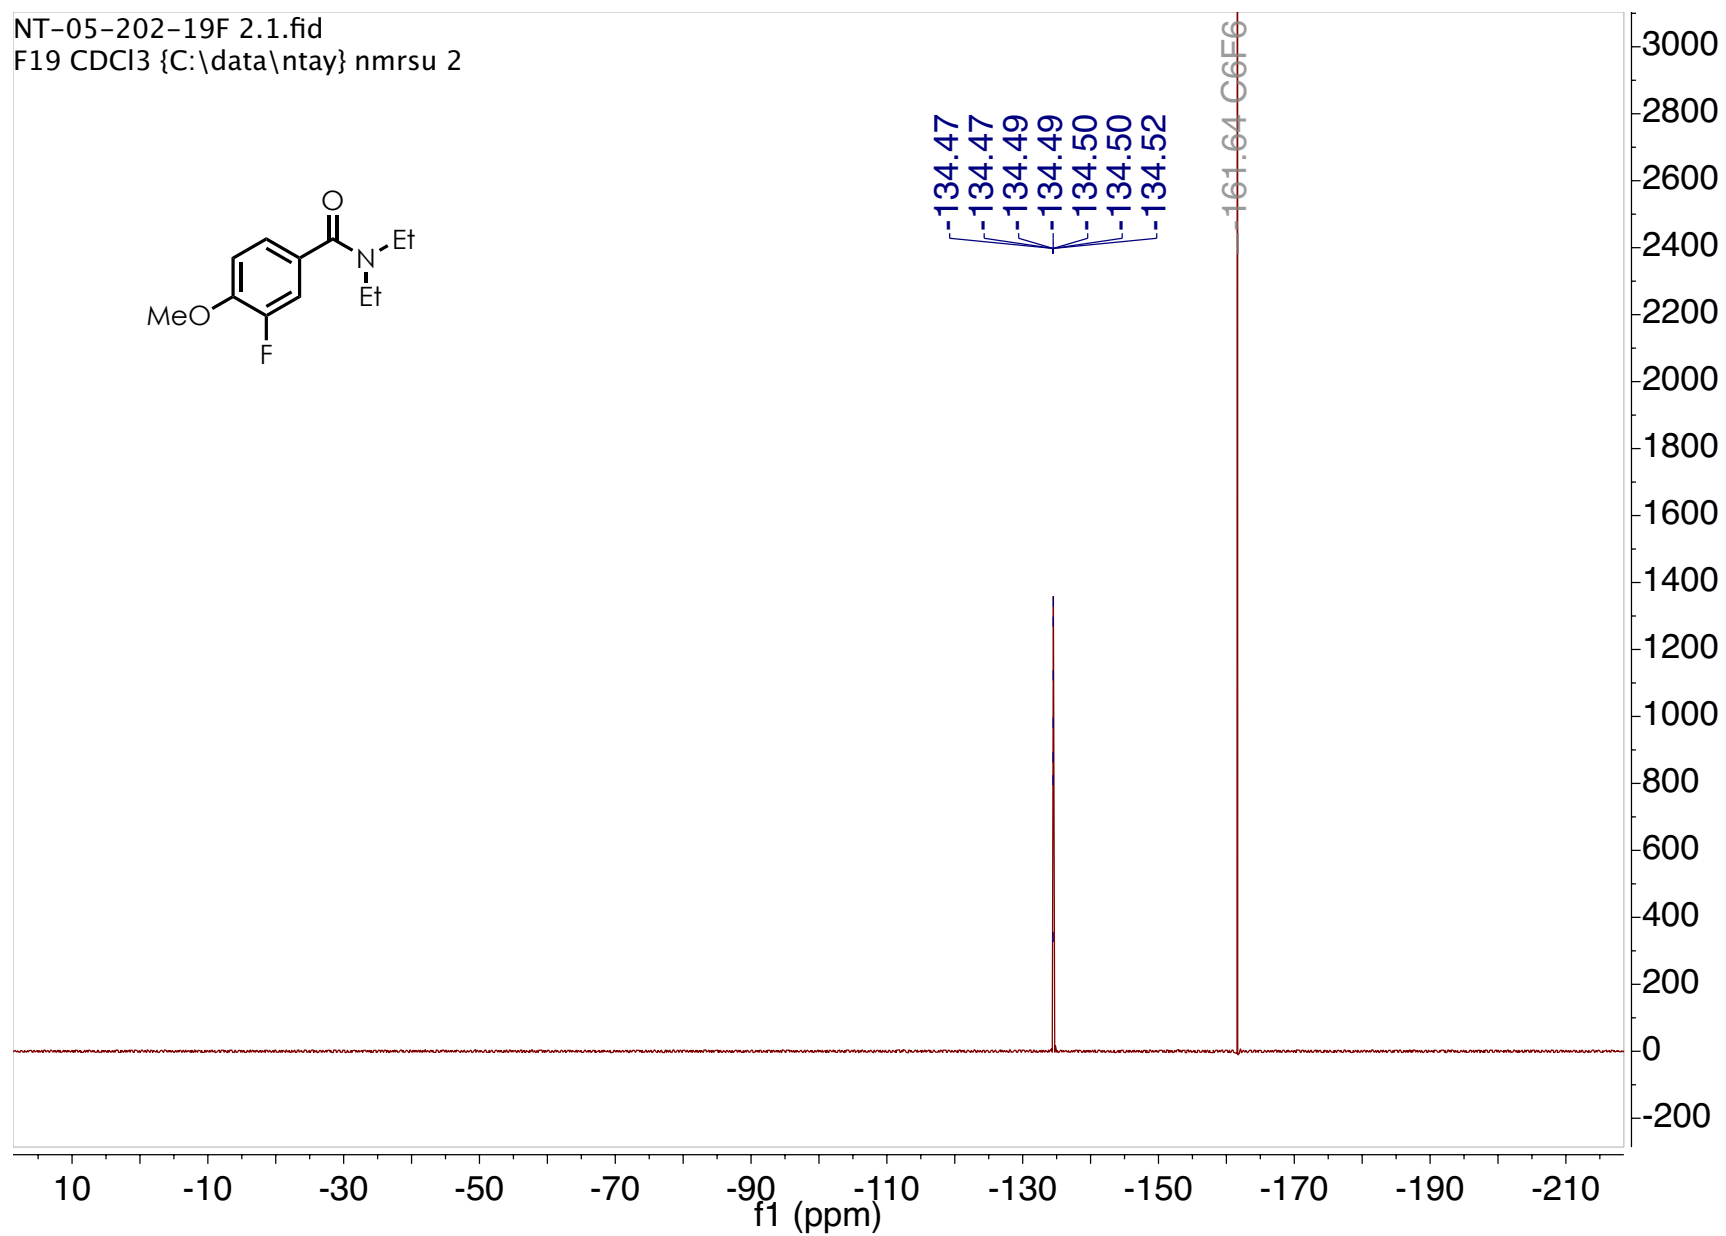

NT-05-186-600.1.fid  
NT-05-186-600

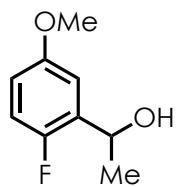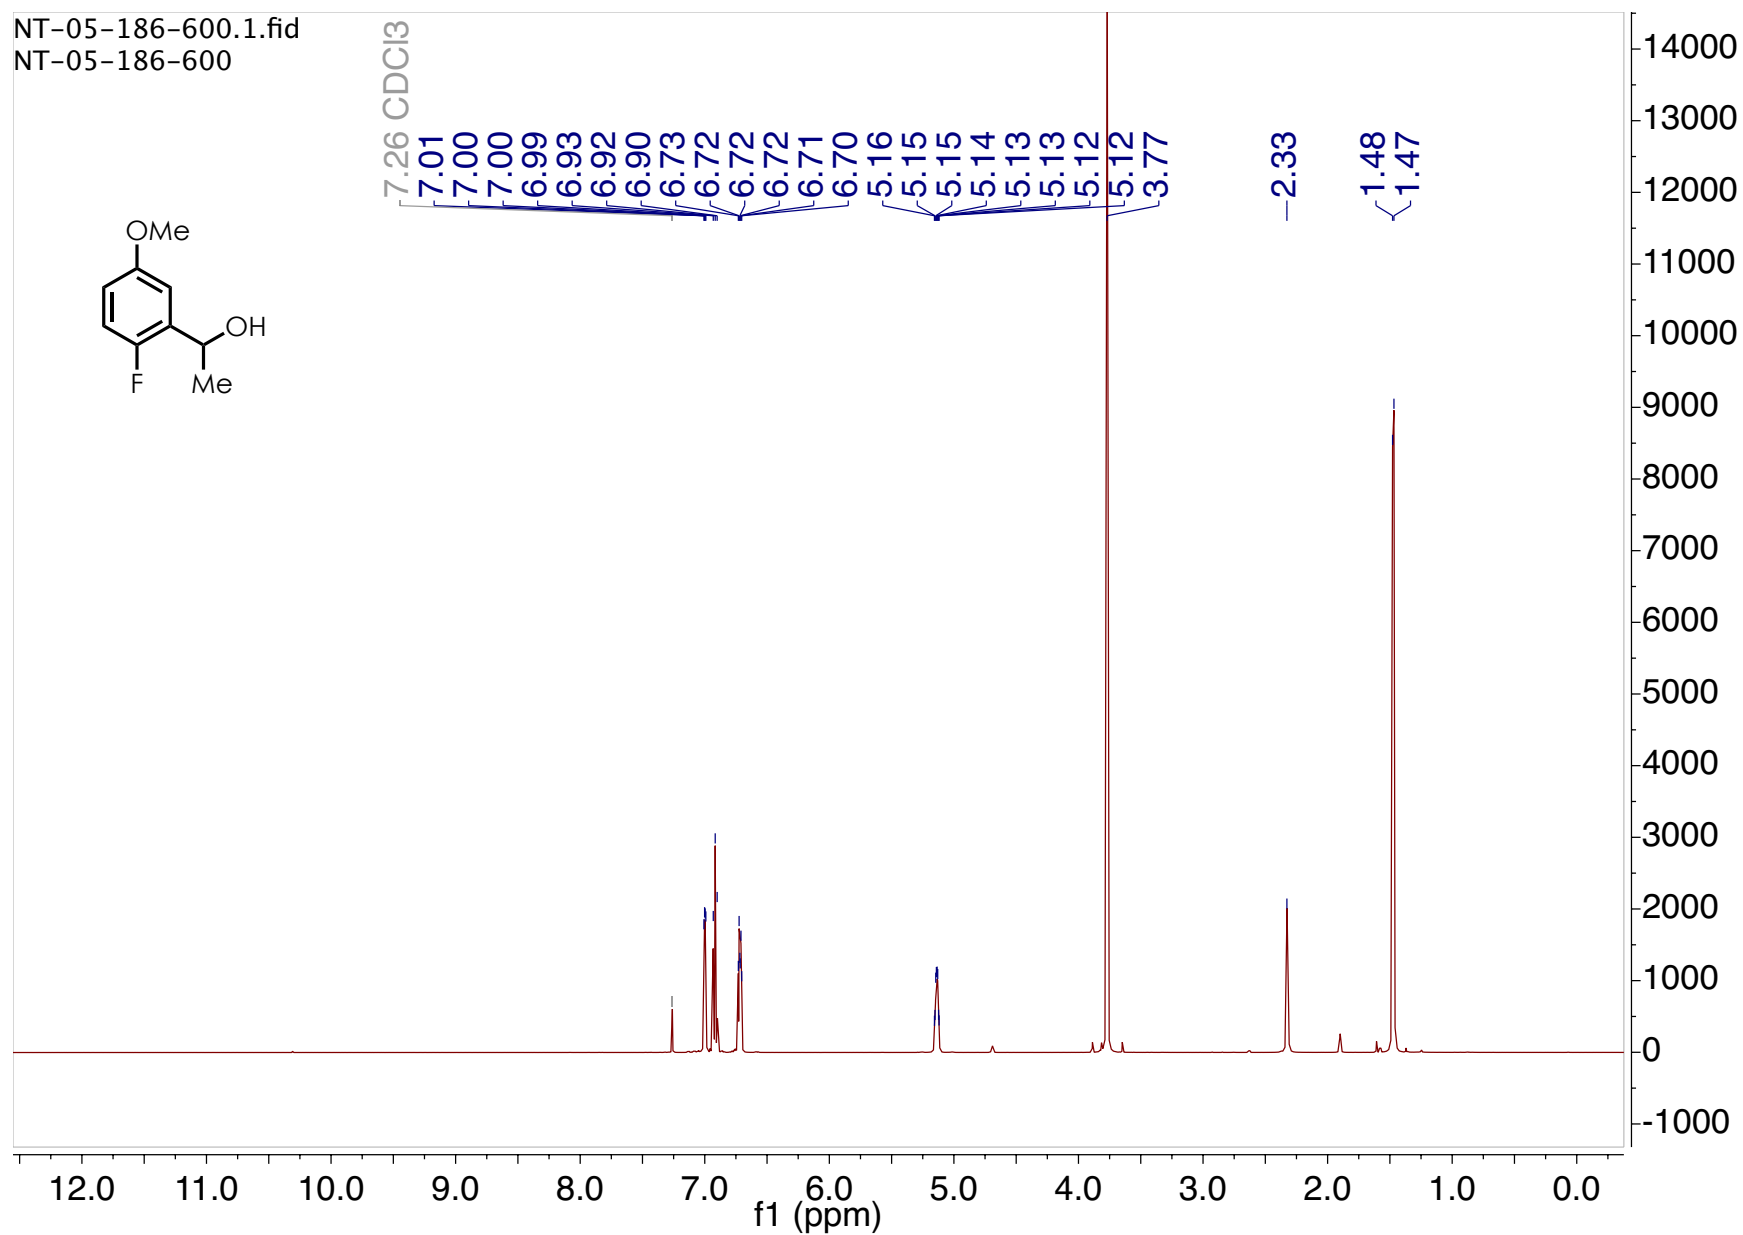

NT-05-186-13C.1.fid  
NT-05-186-13C

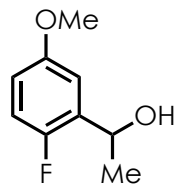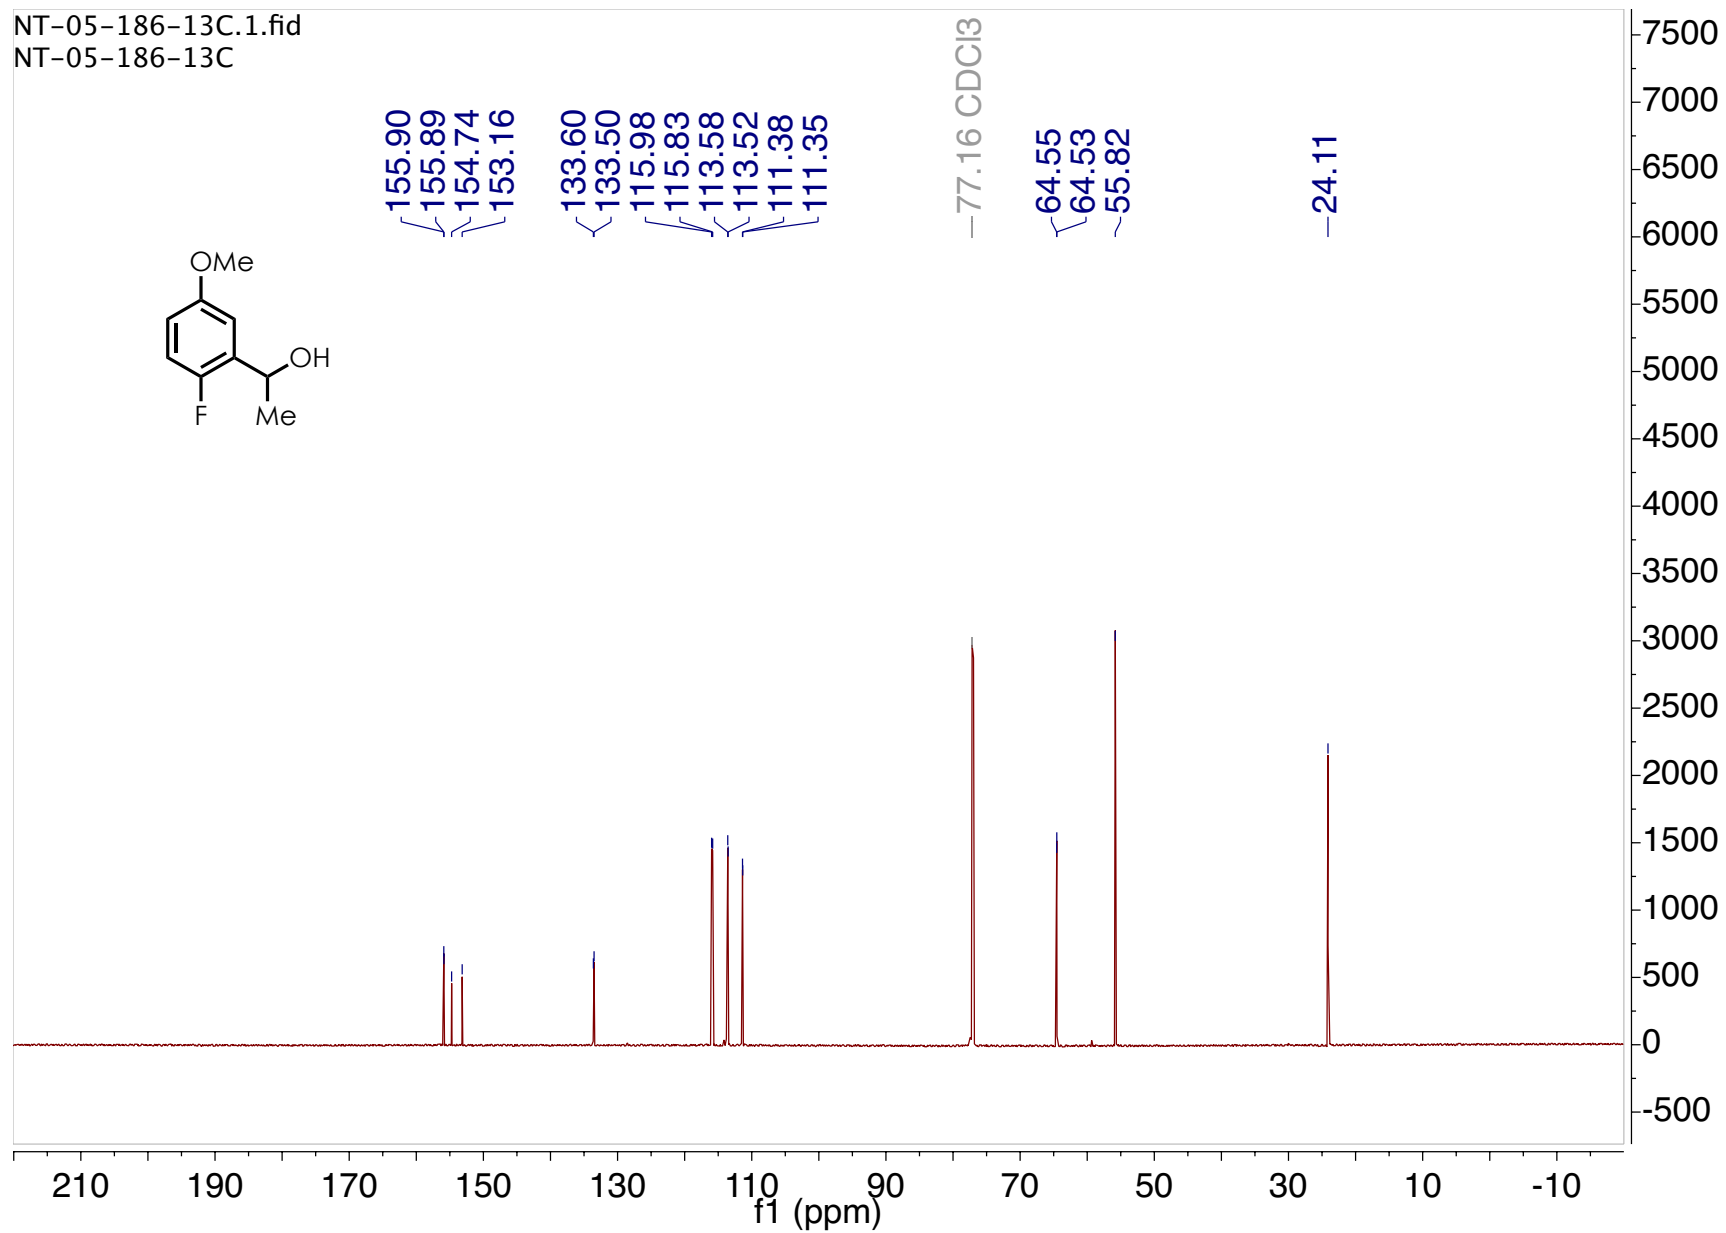

NT-05-186-19F 2.3.fid  
F19 CDCl3 {C:\data\ntay} nmrsu 41

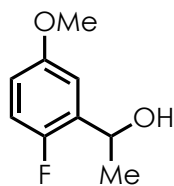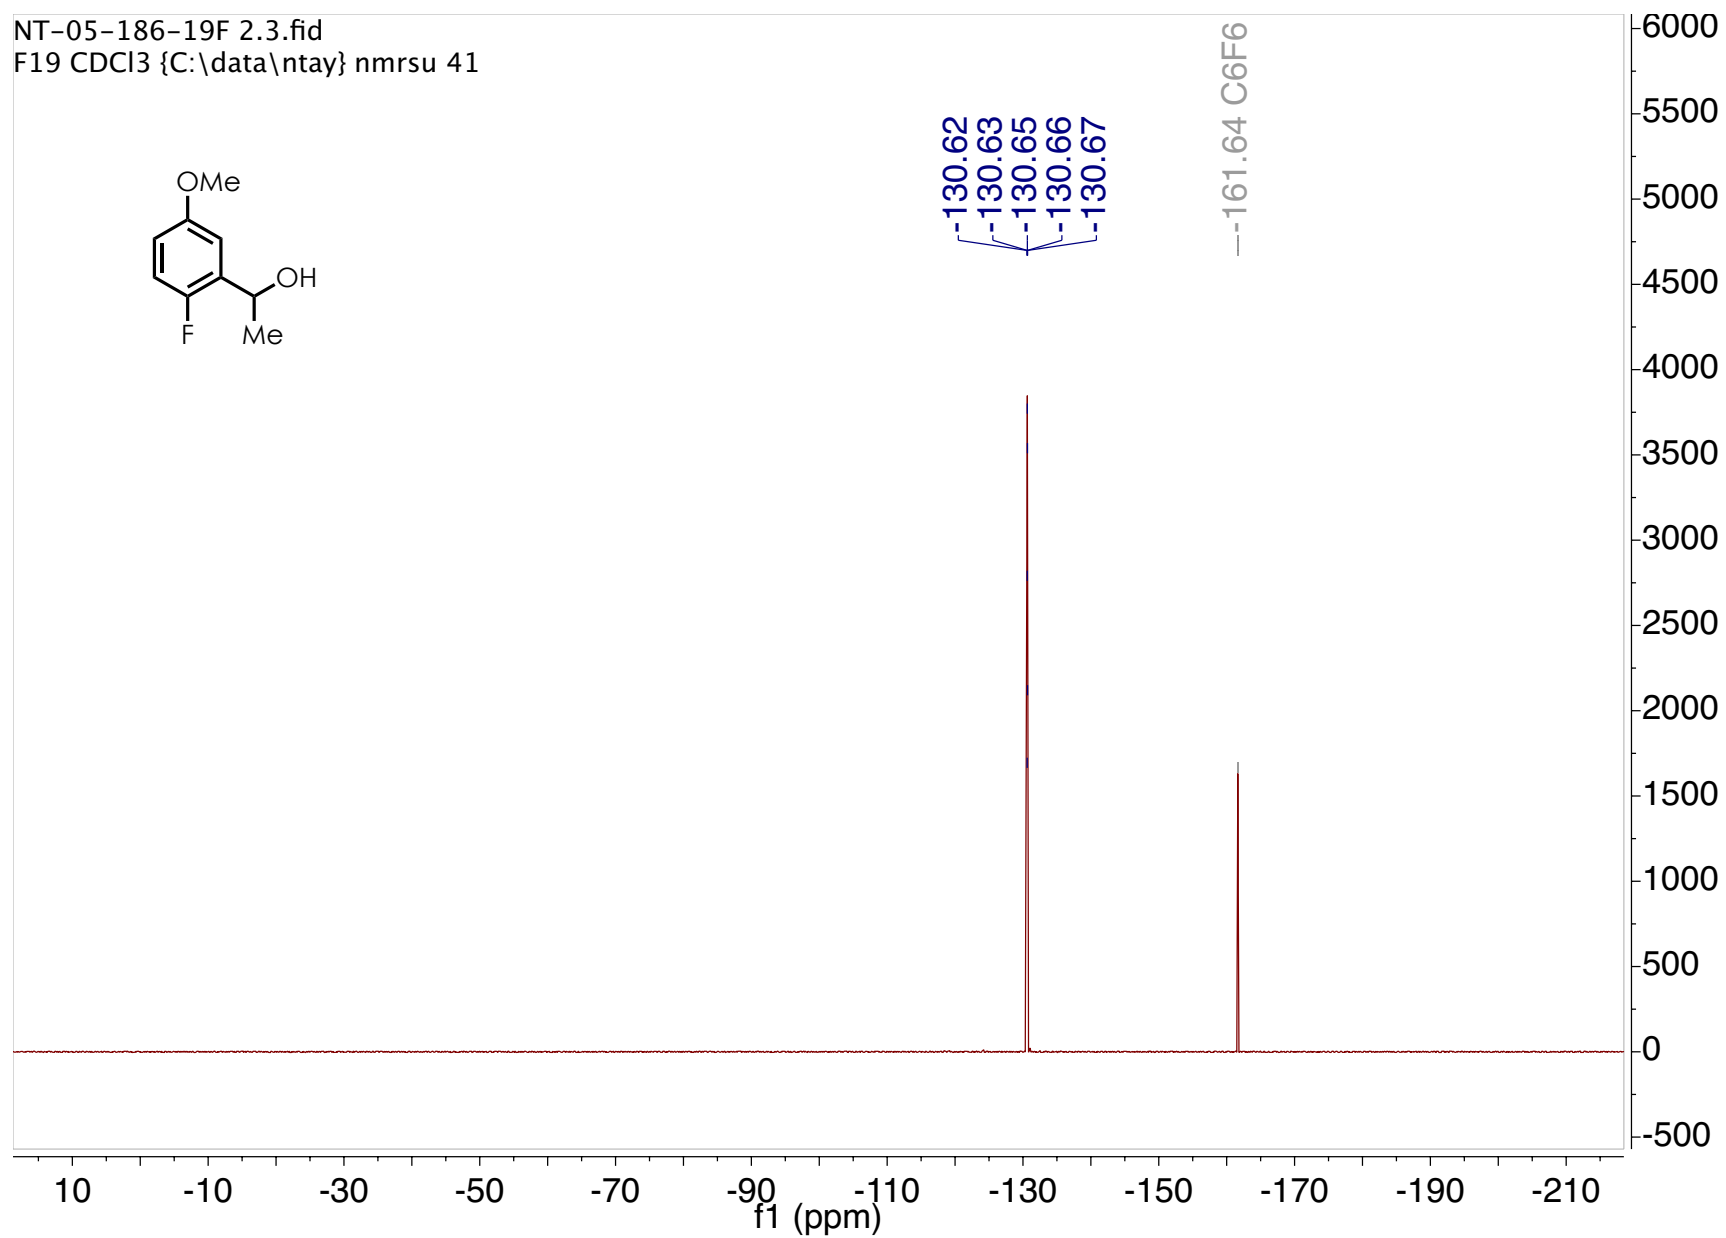

NT-05-191-600.1.fid  
NT-05-191

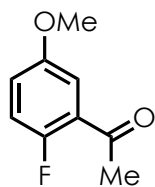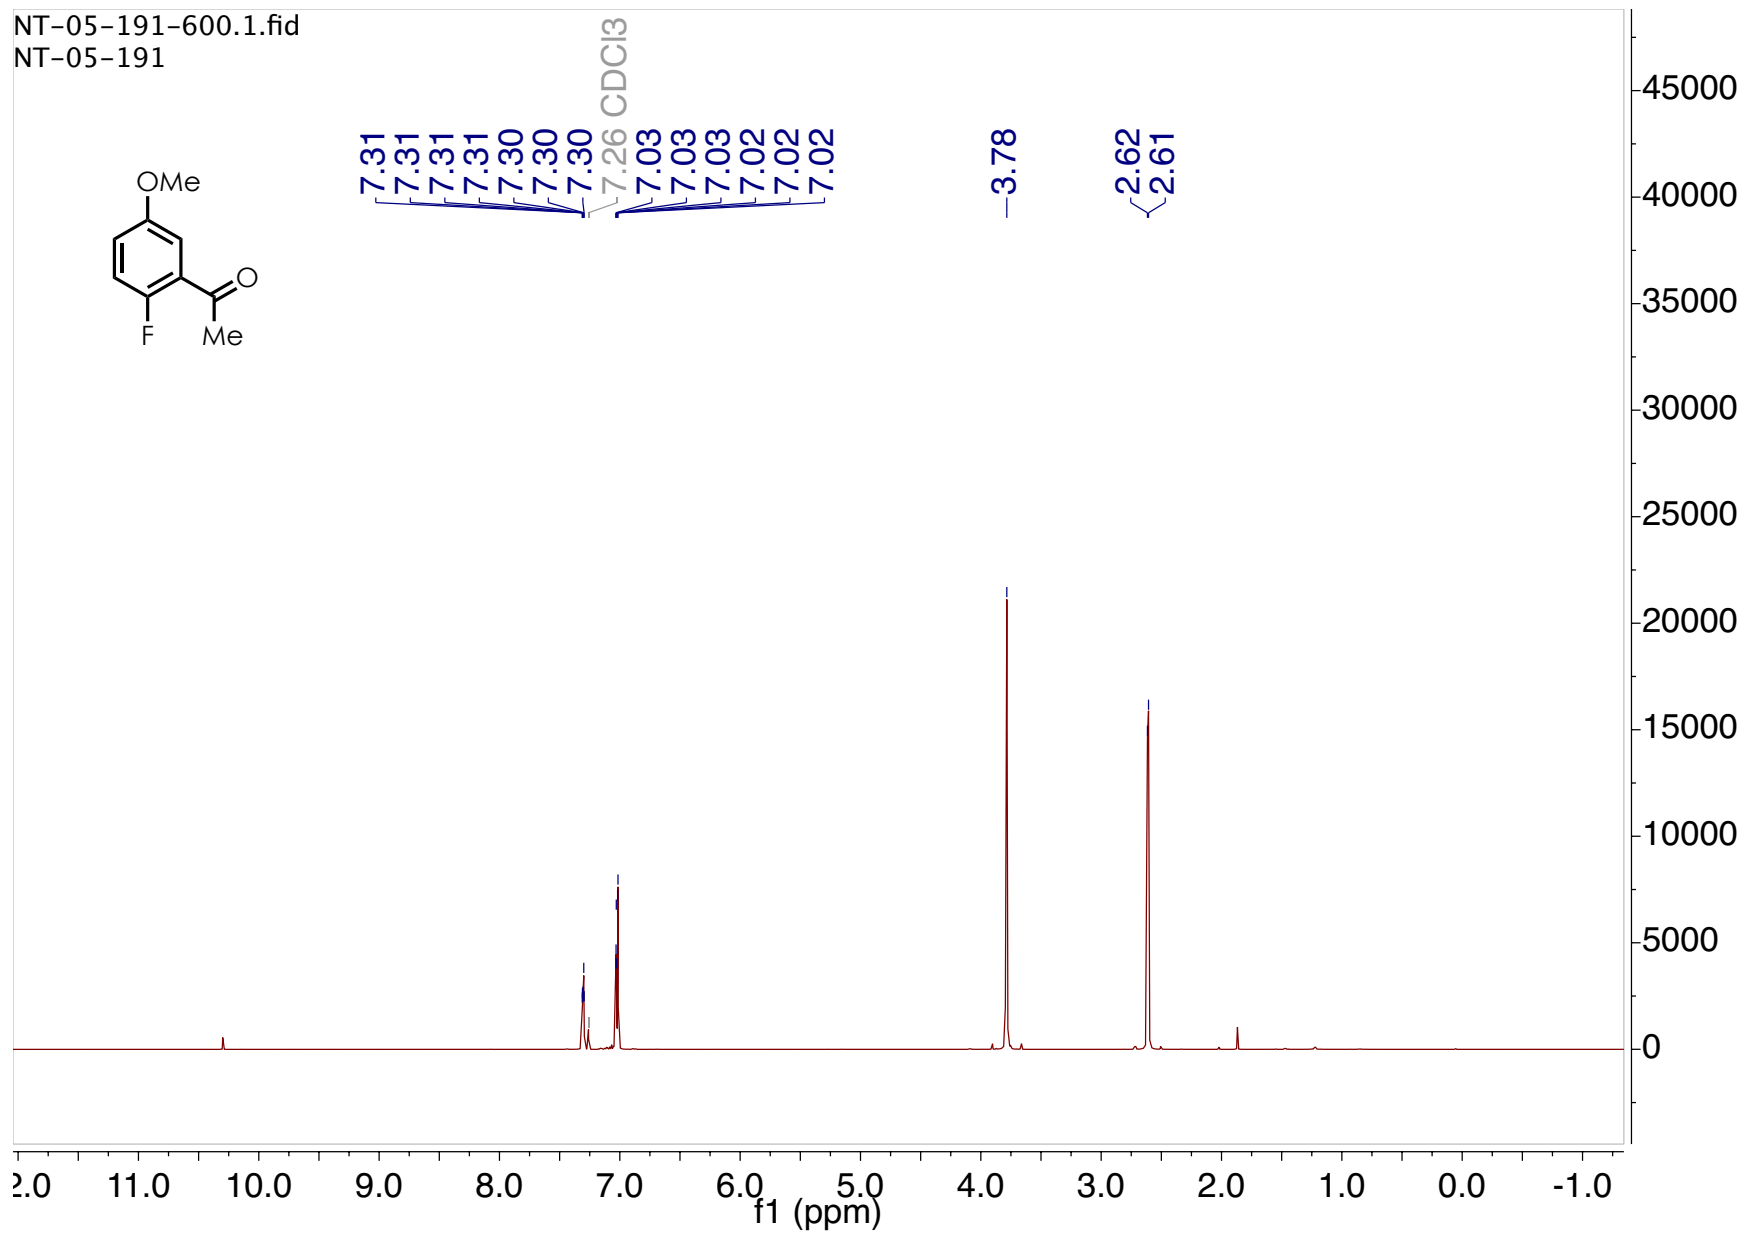

NT-05-191-13C.1.fid  
NT-05-191-13C

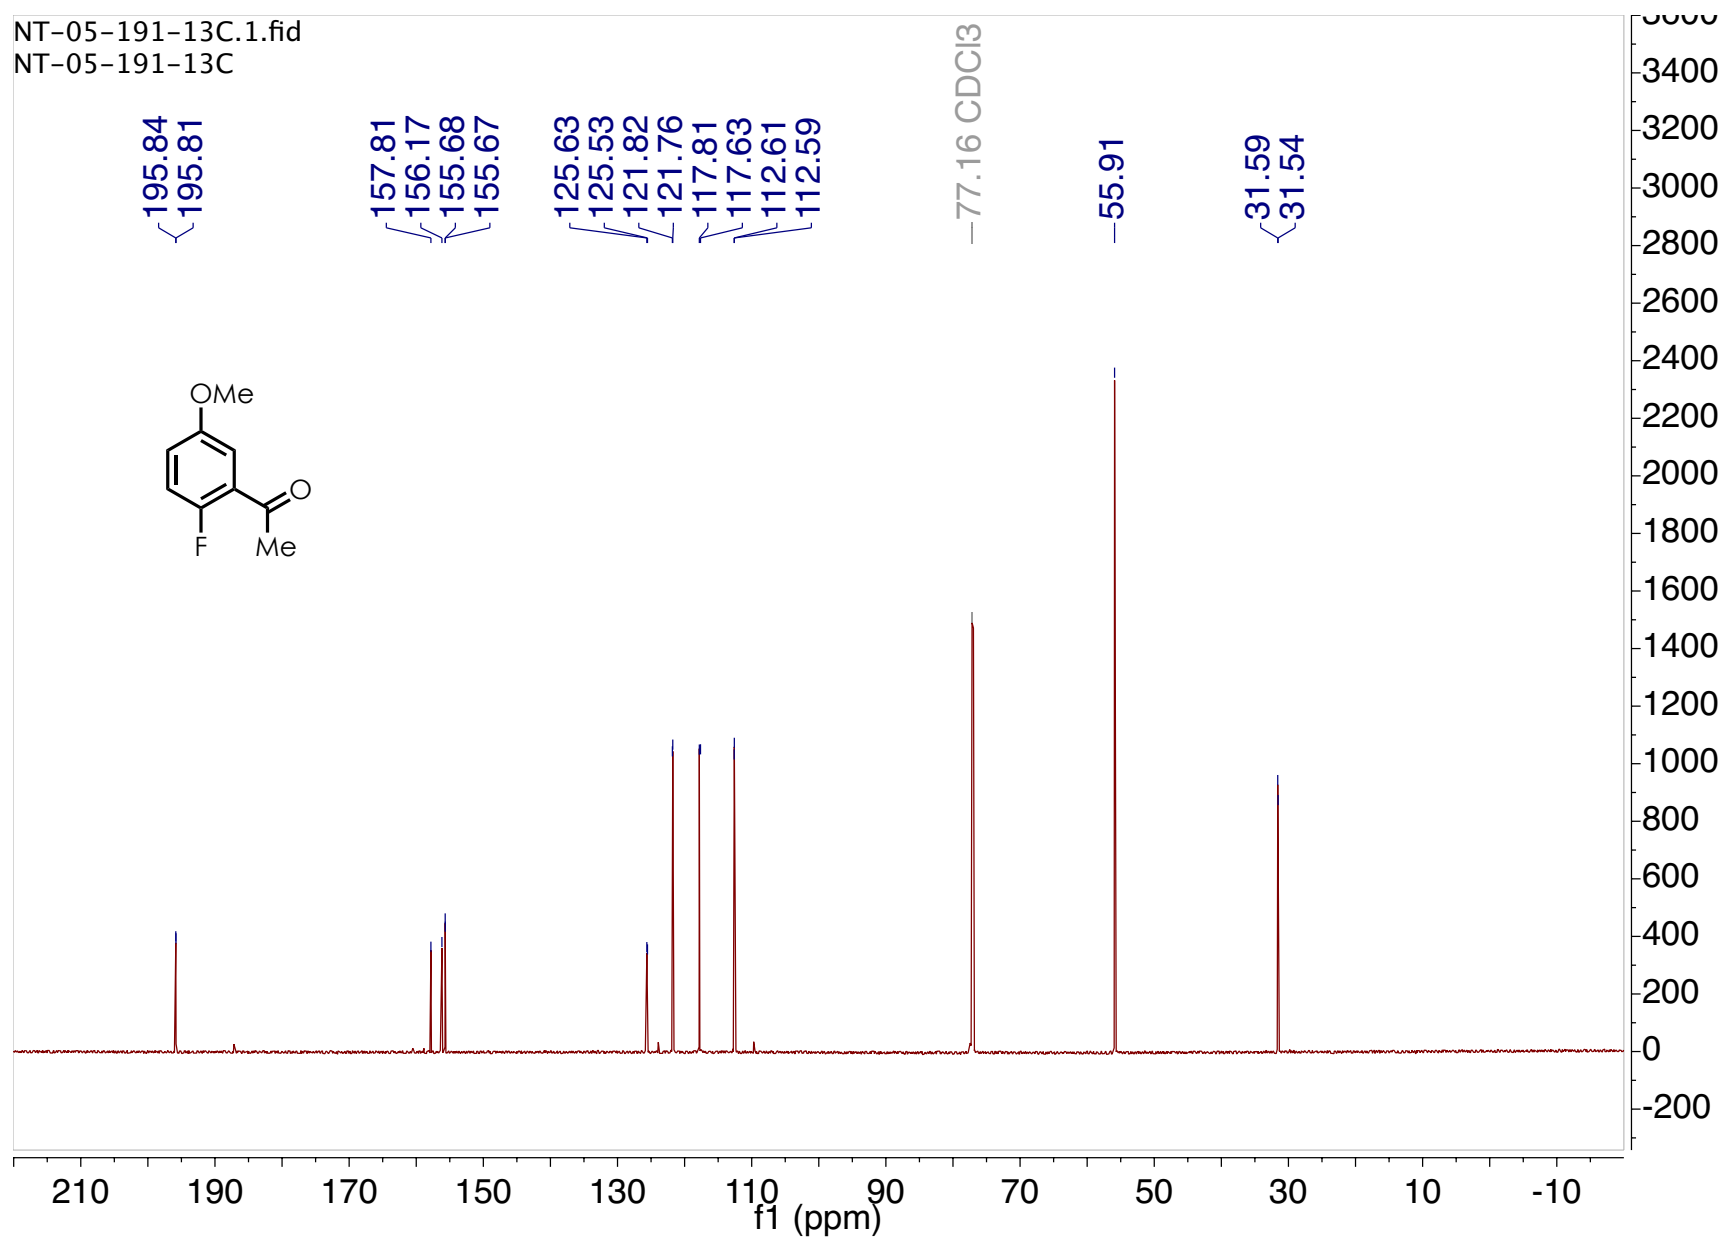

NT-05-191-19F 3.2.fid  
F19 CDCl3 {C:\data\ntay} nmrsu 54

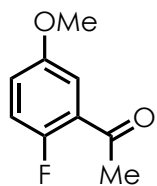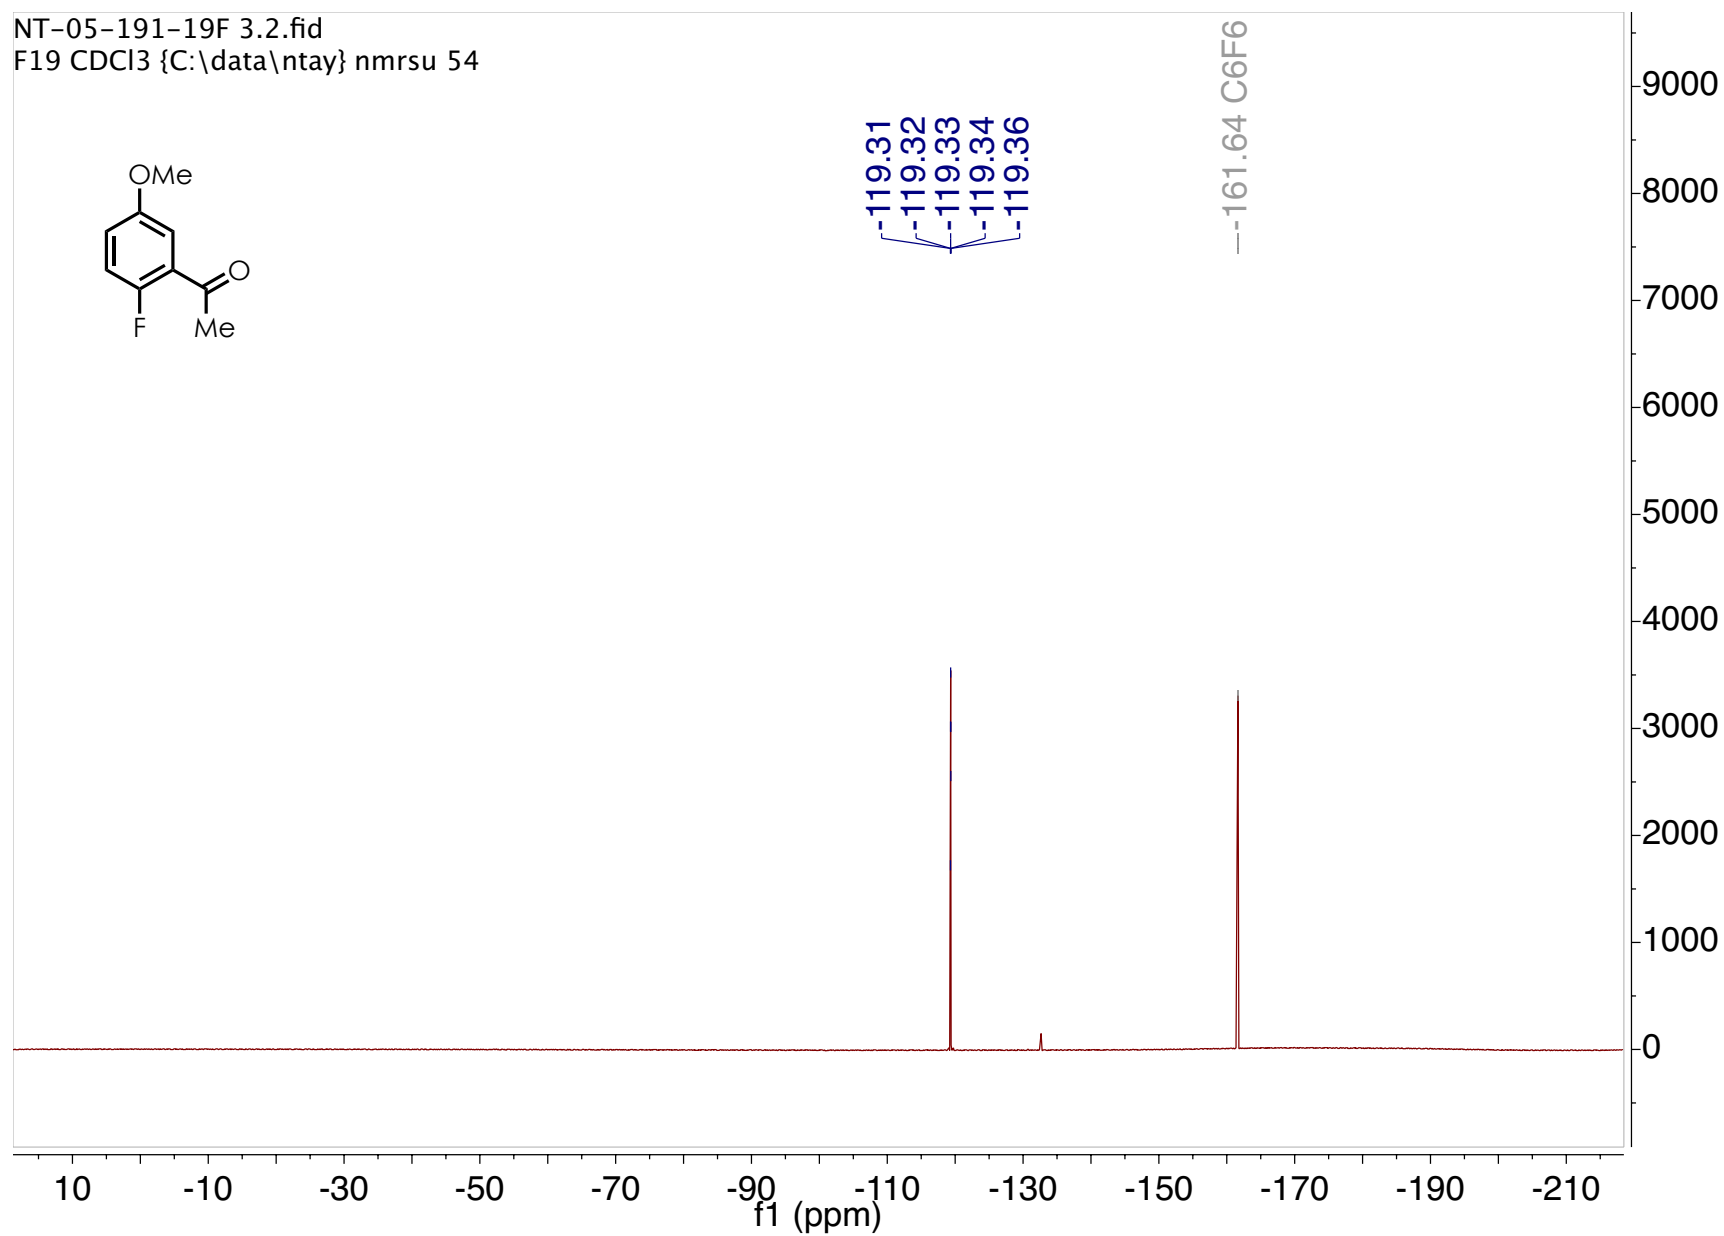

NT-05-264-1H.1.fid  
NT-05-264-1H

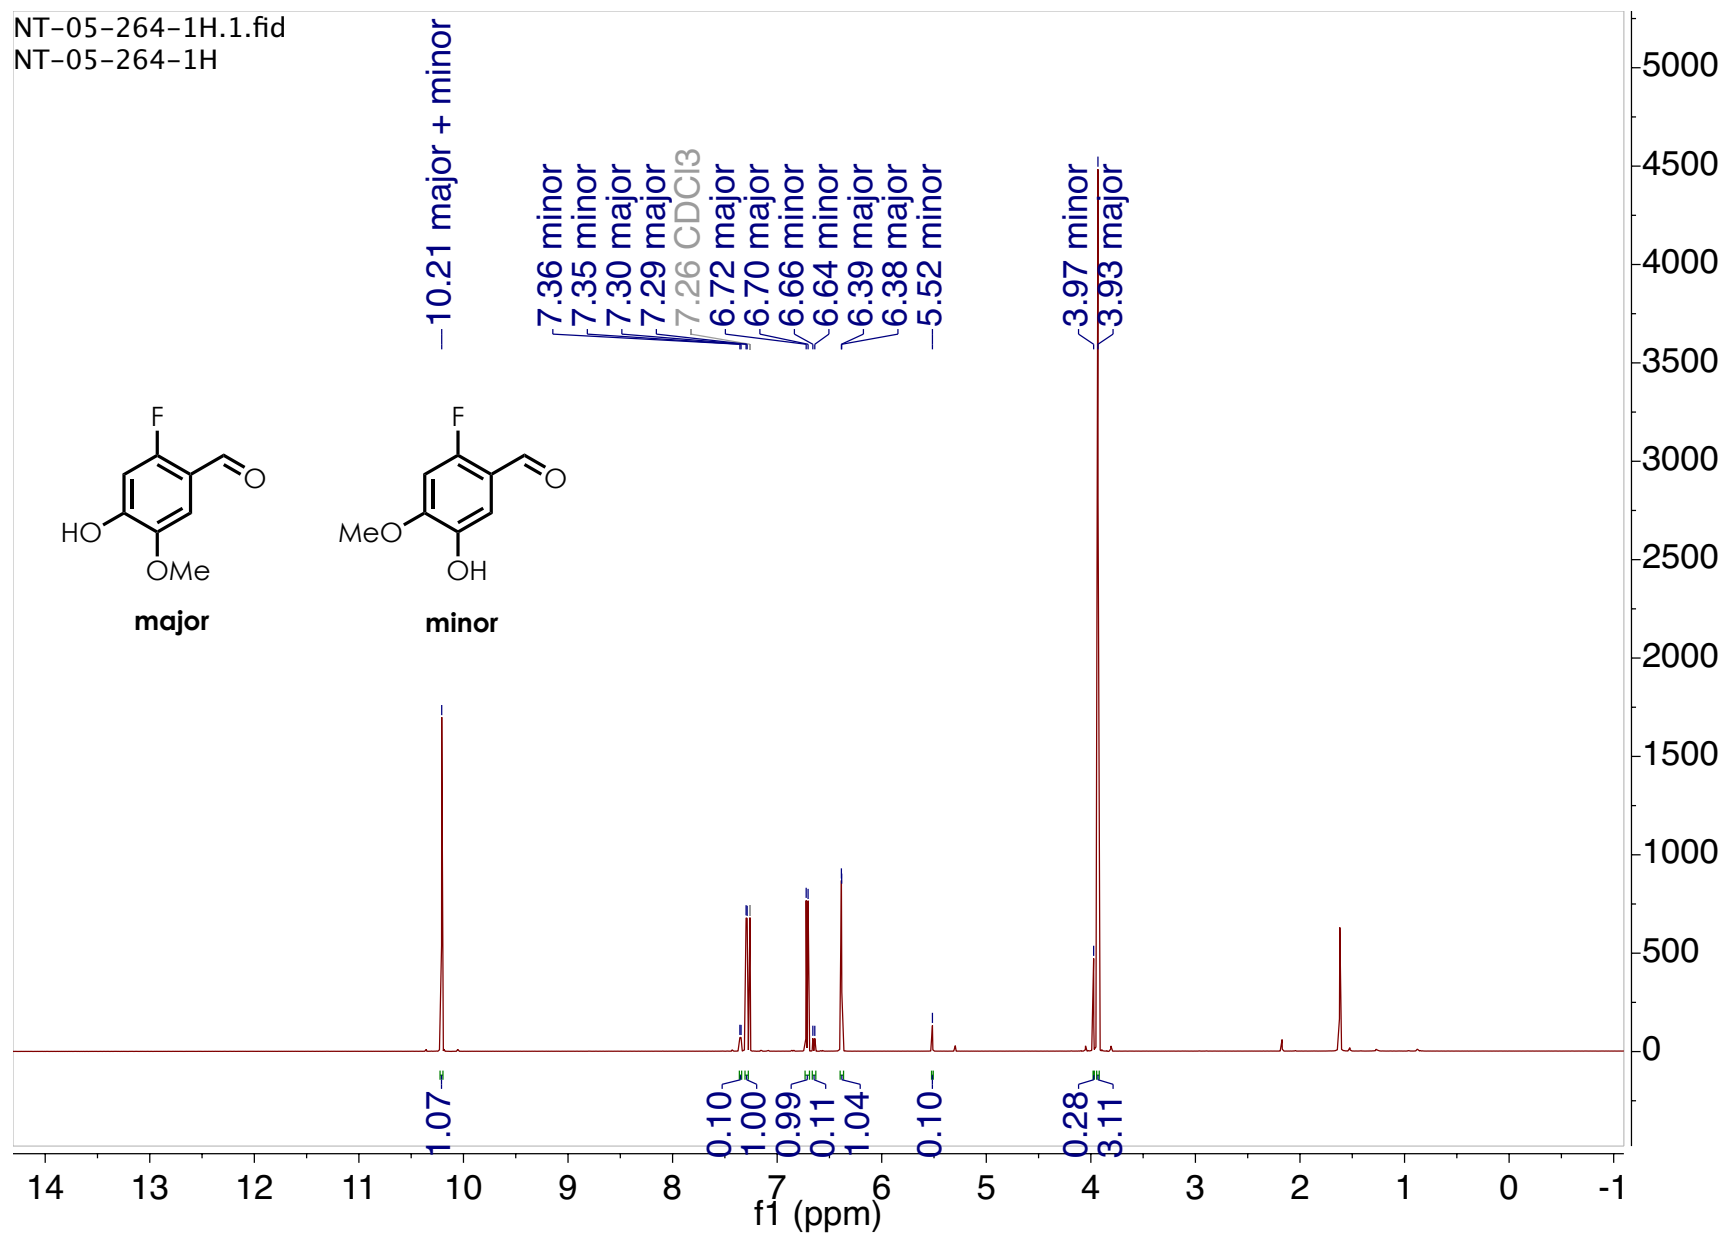

NT-05-264-13C.1.fid

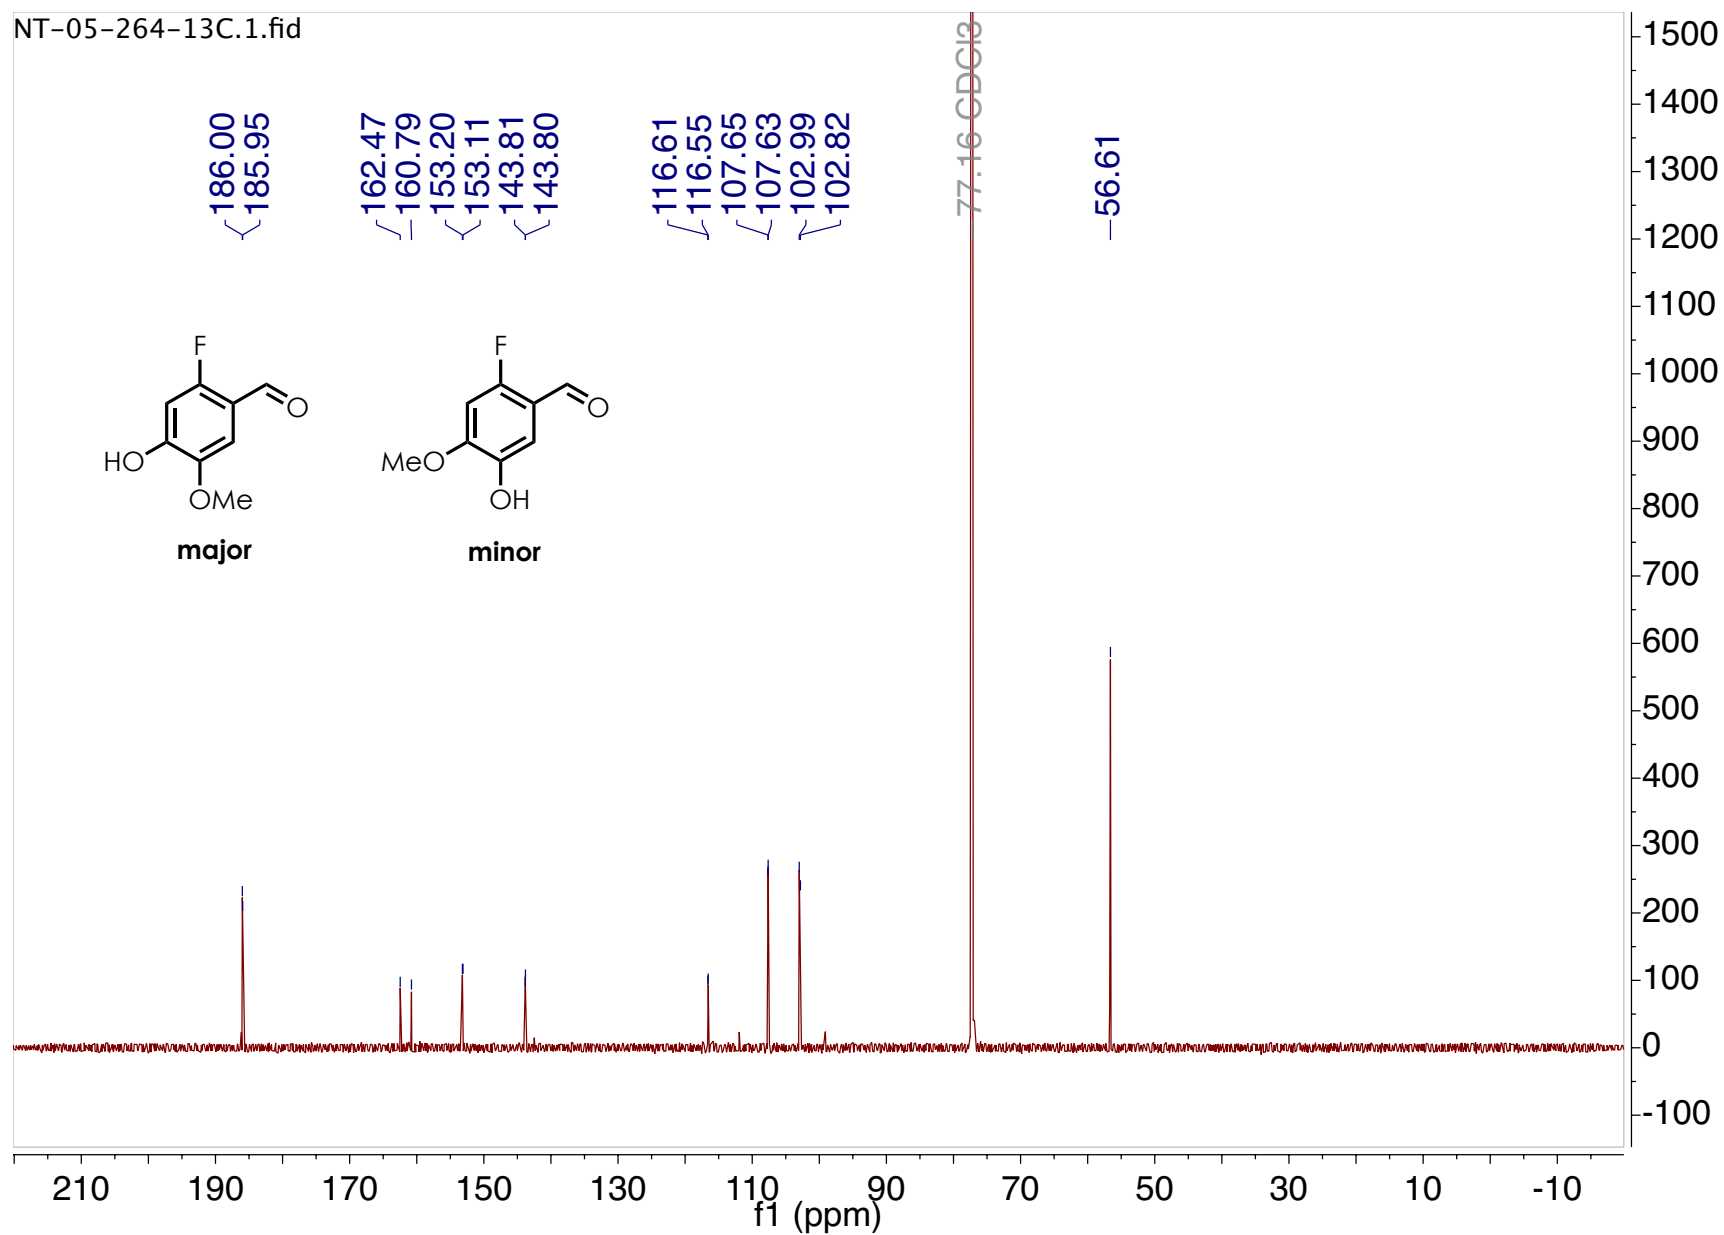

NT-05-264-19F 2.1.fid  
F19 CDCl3 {C:\data\ntay} nmrsu 10

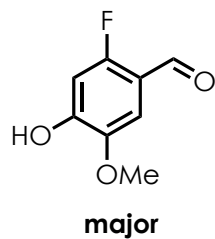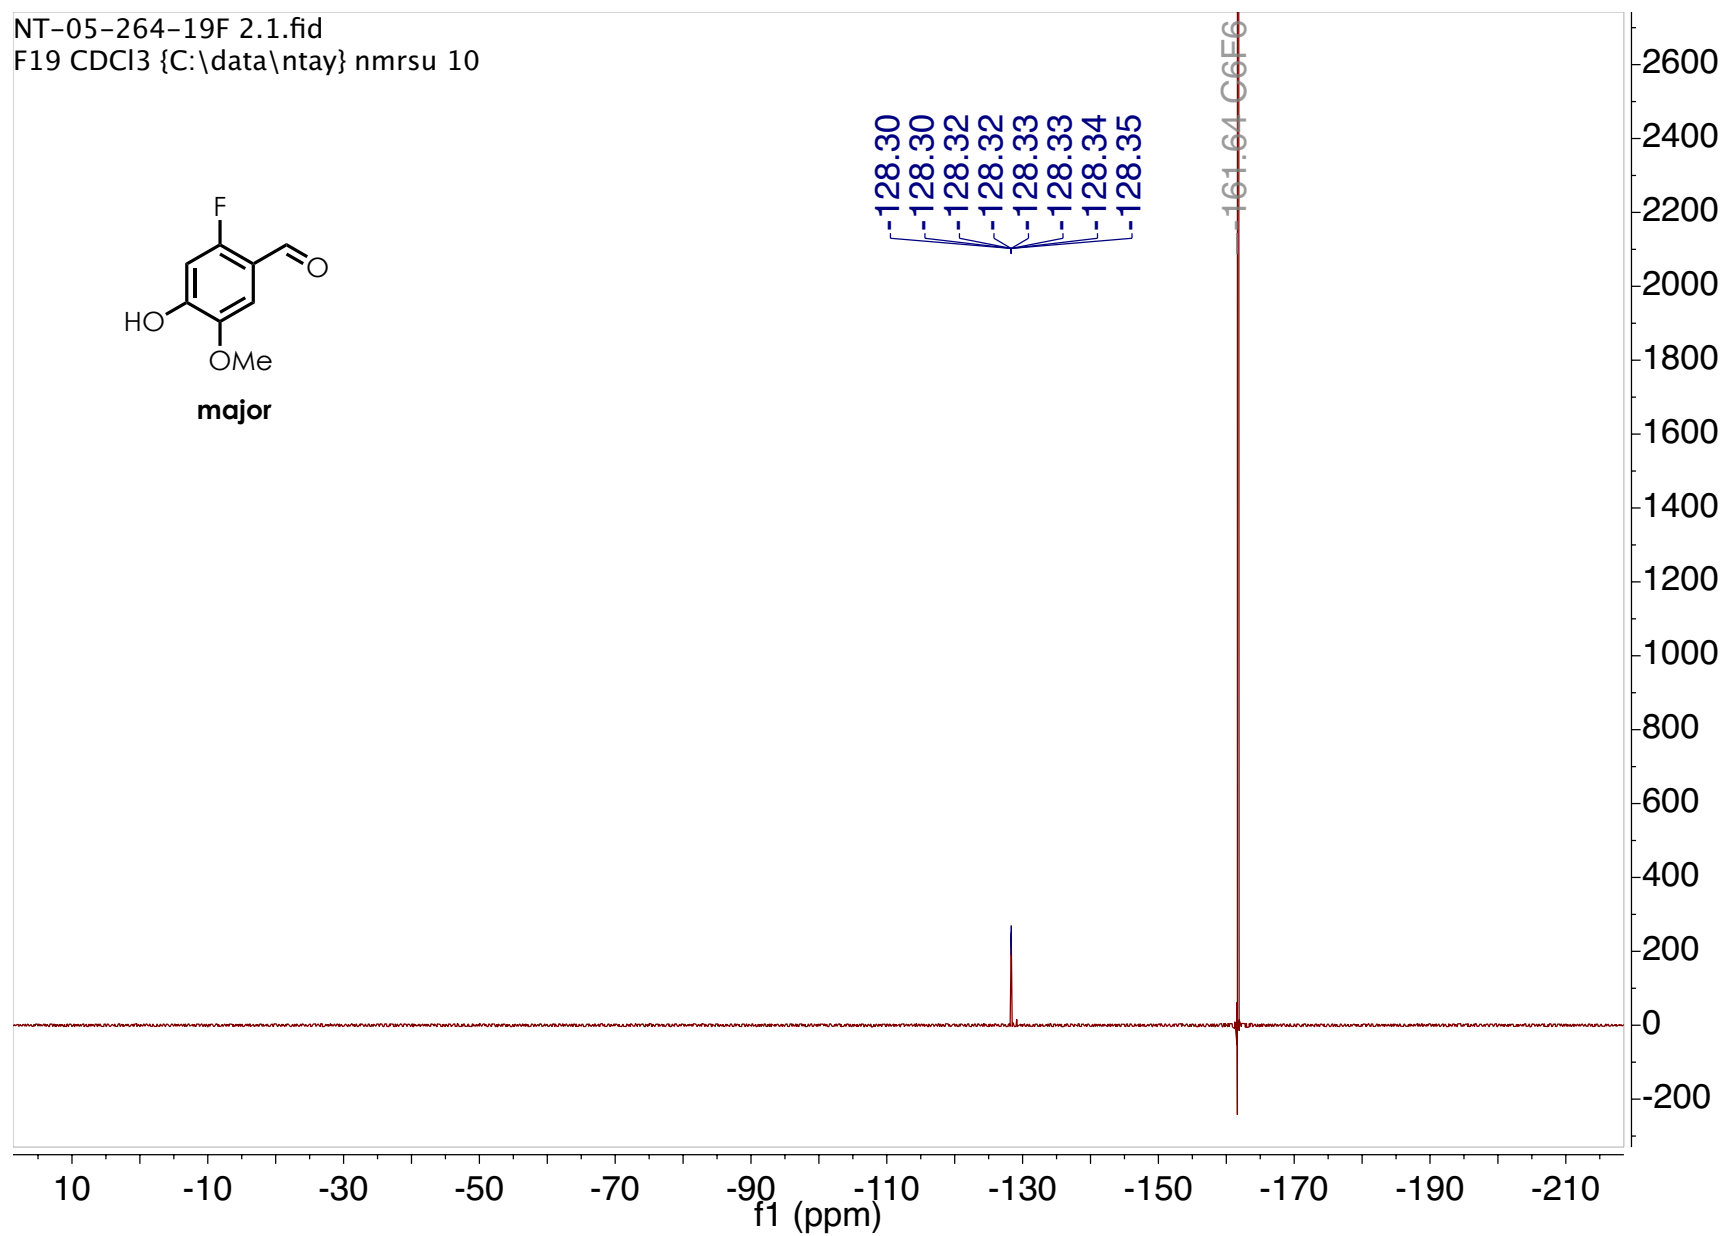

NT-05-264-19F.2.fid  
F19CPD CDCl3 {C:\data\ntay} nmrsu 10

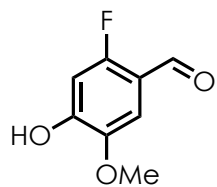

major

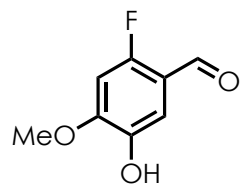

minor

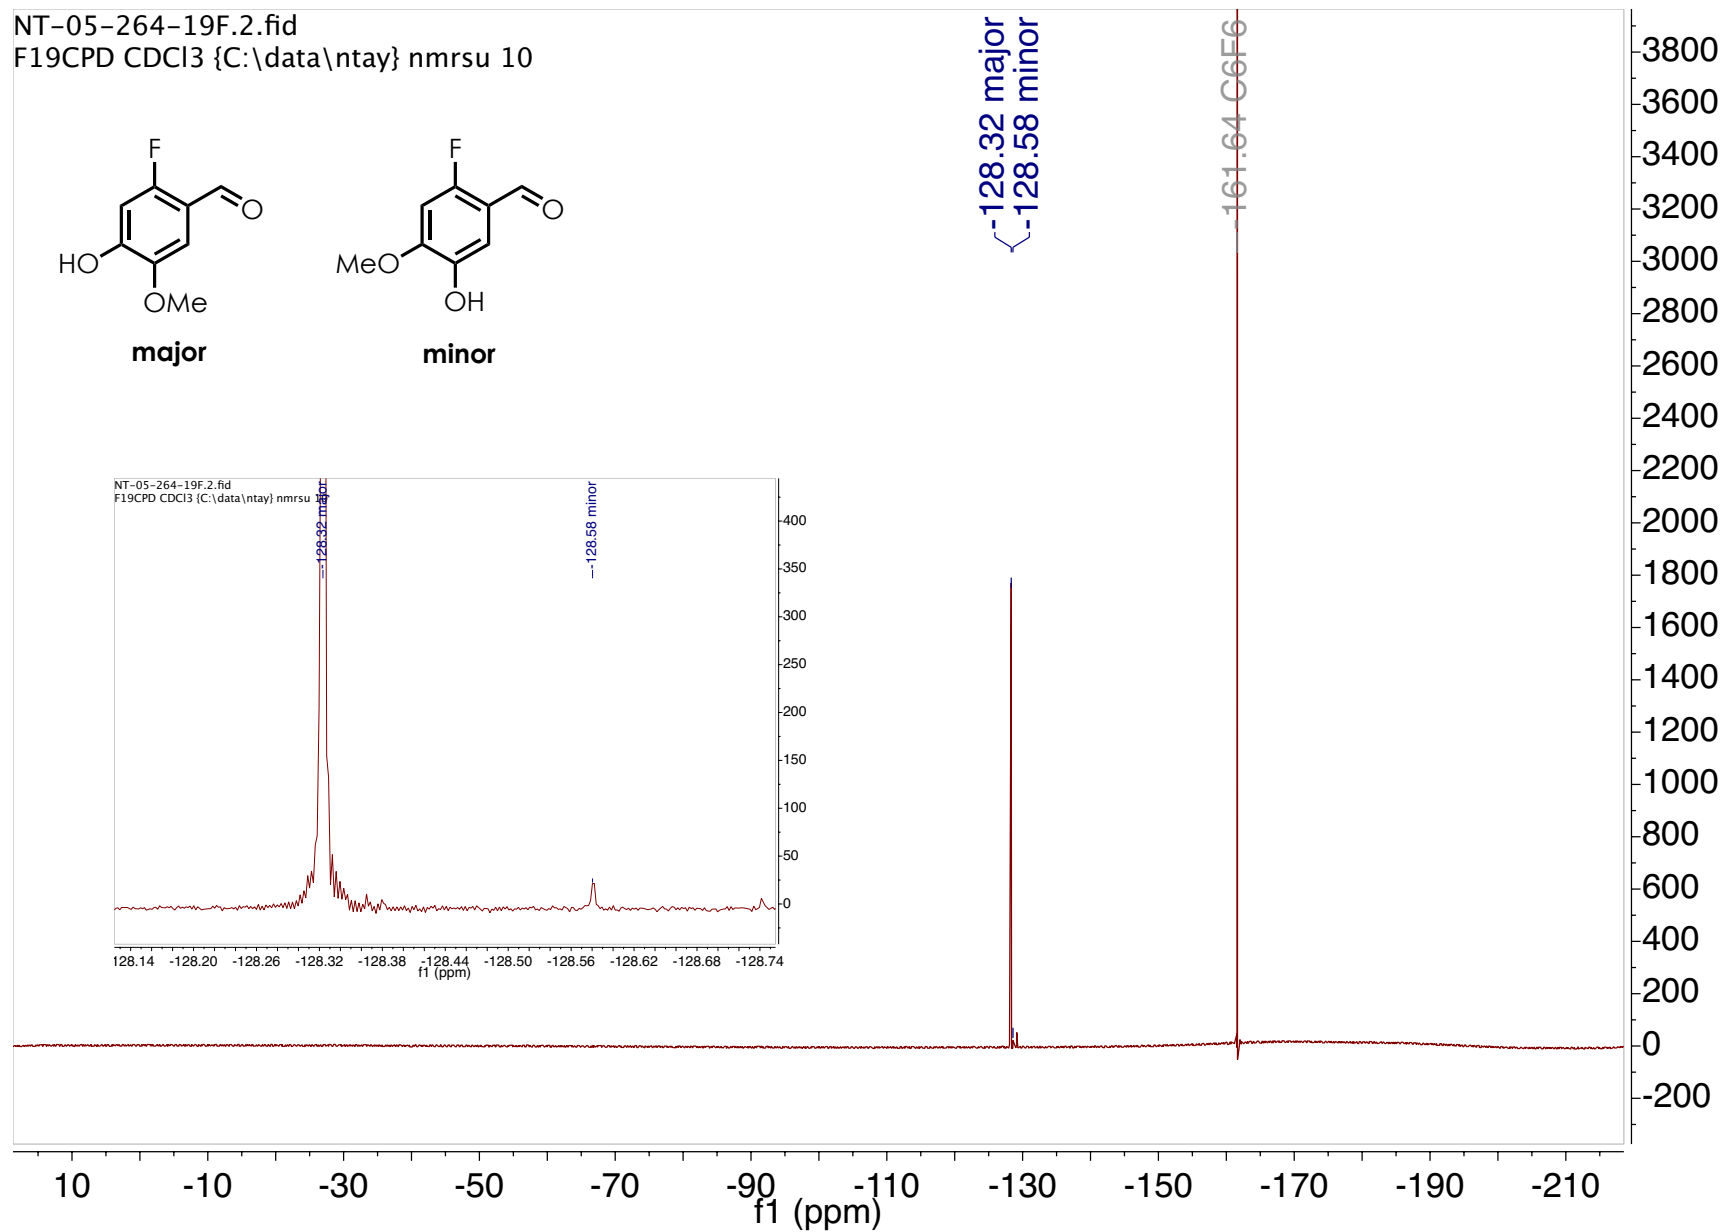

NT-05-268-1H.1.fid

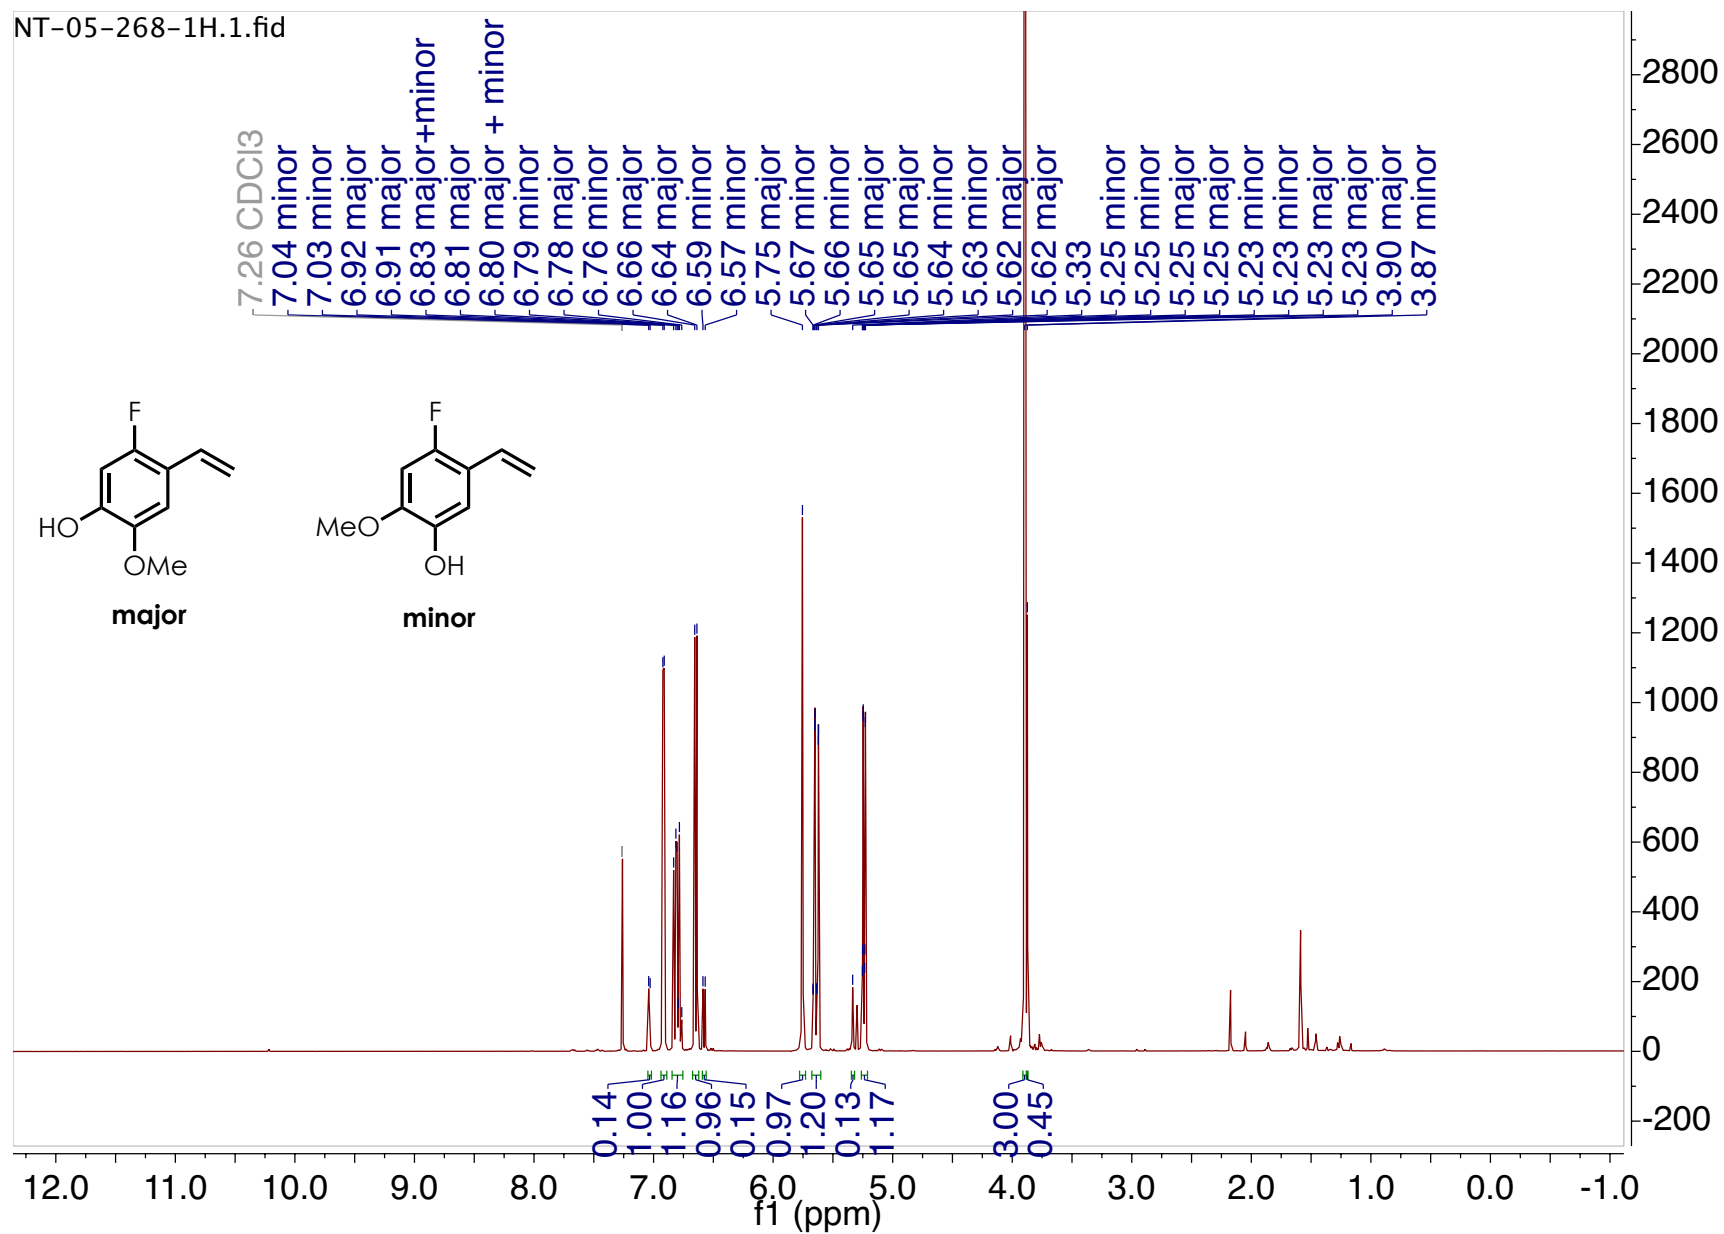

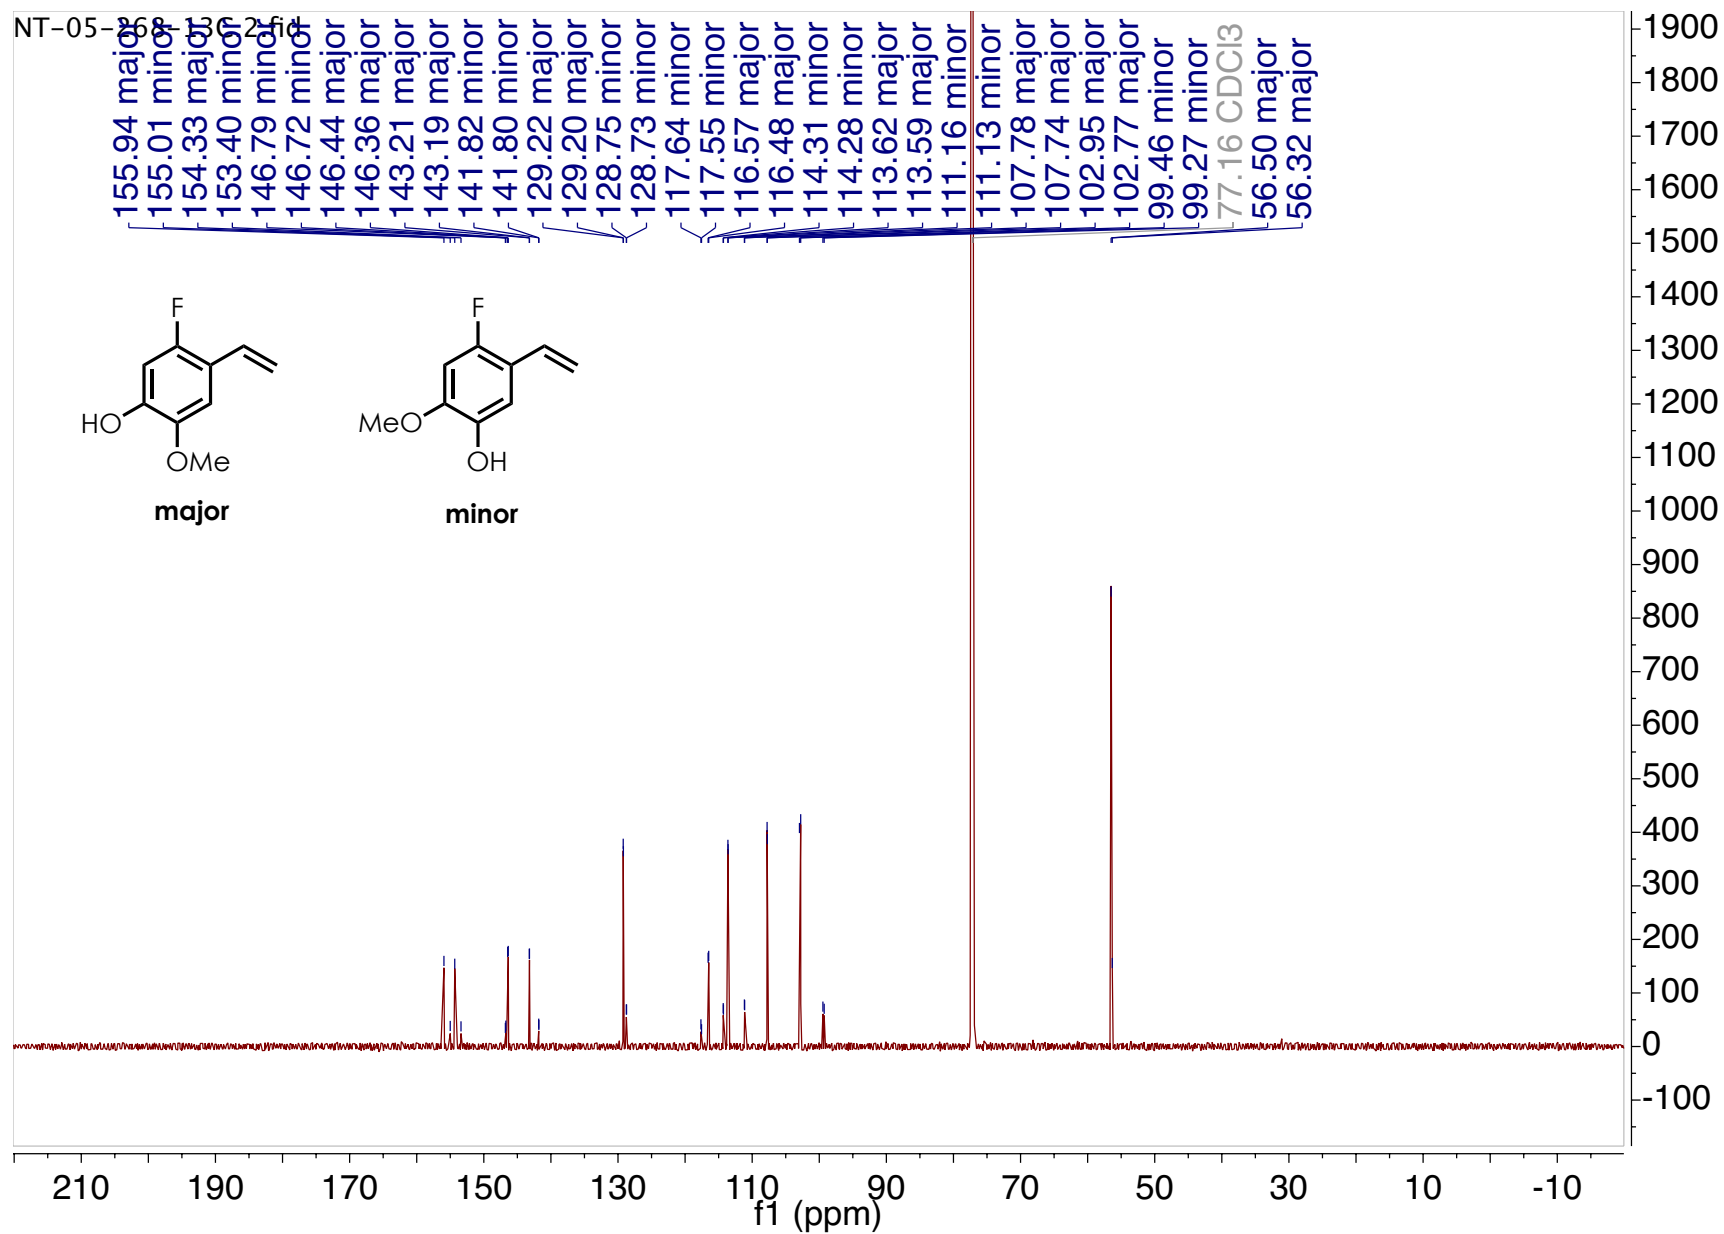

NT-05-268-19F.1.fid  
F19 CDCl3 {C:\data\ntay} nmrsu 11

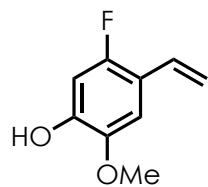

major

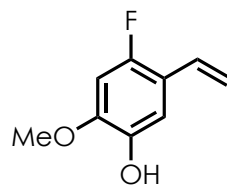

minor

125.65  
125.67  
125.68  
125.70  
126.52  
126.54  
126.55  
126.57

161.64 C6F6

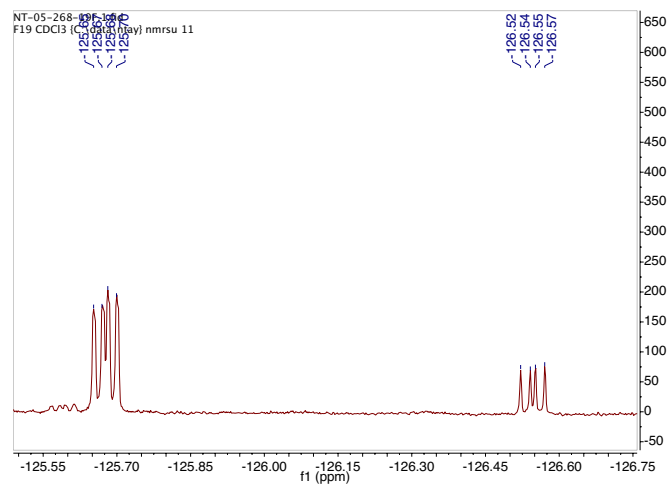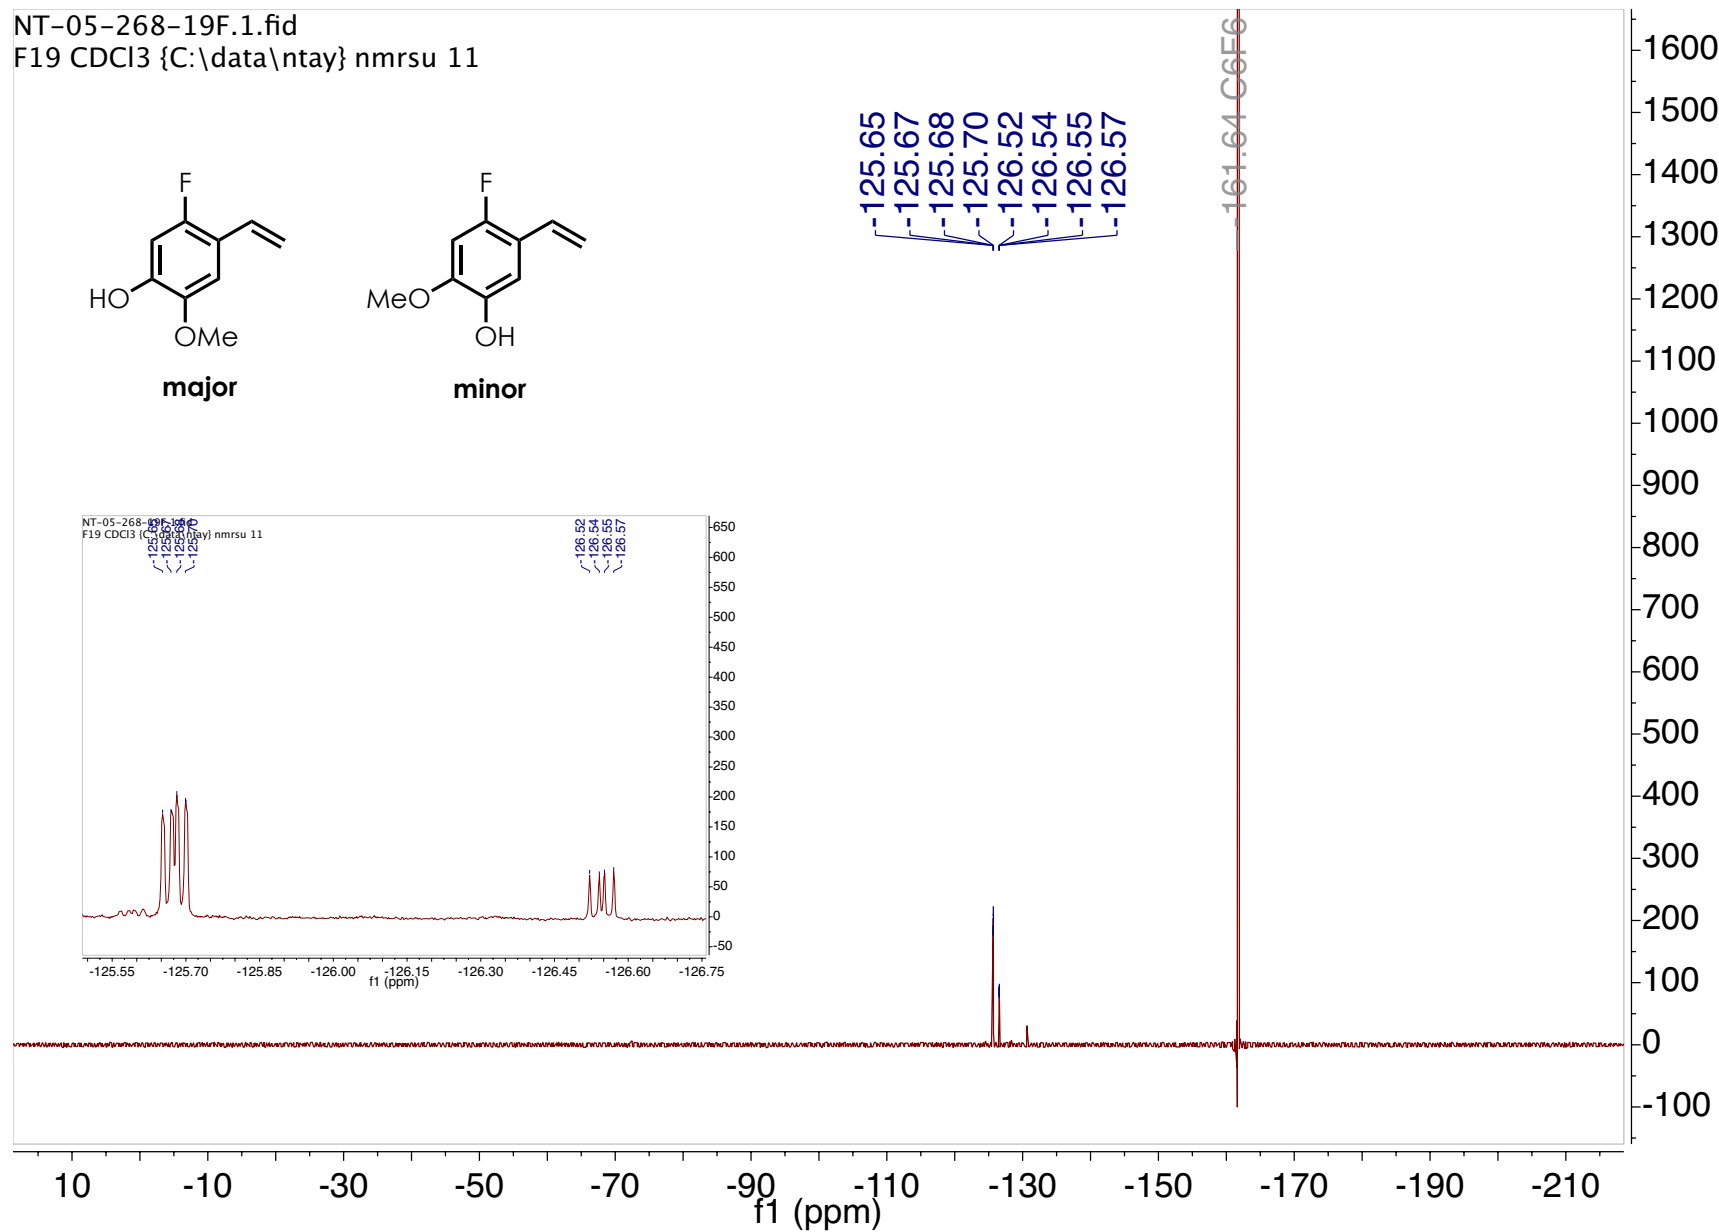

NT-05-270-1H.1.fid

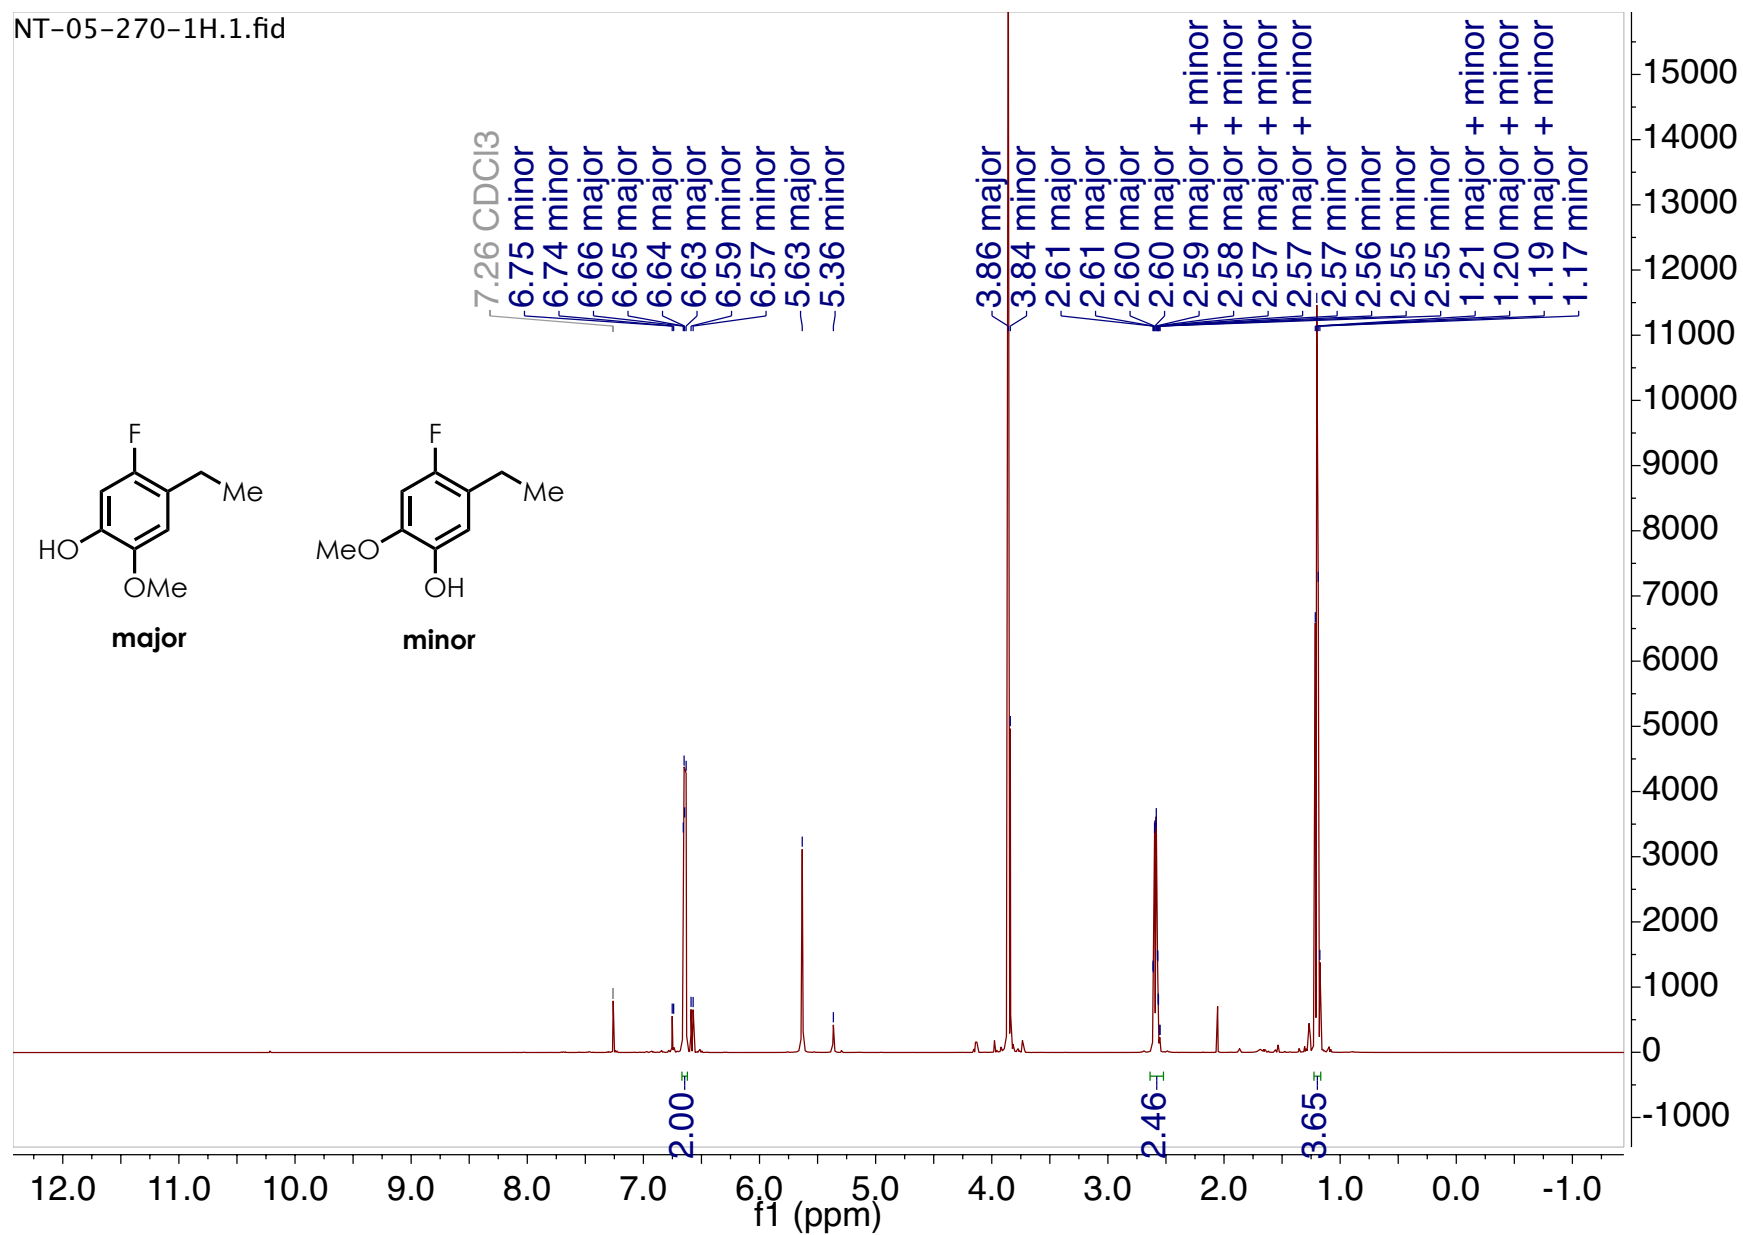

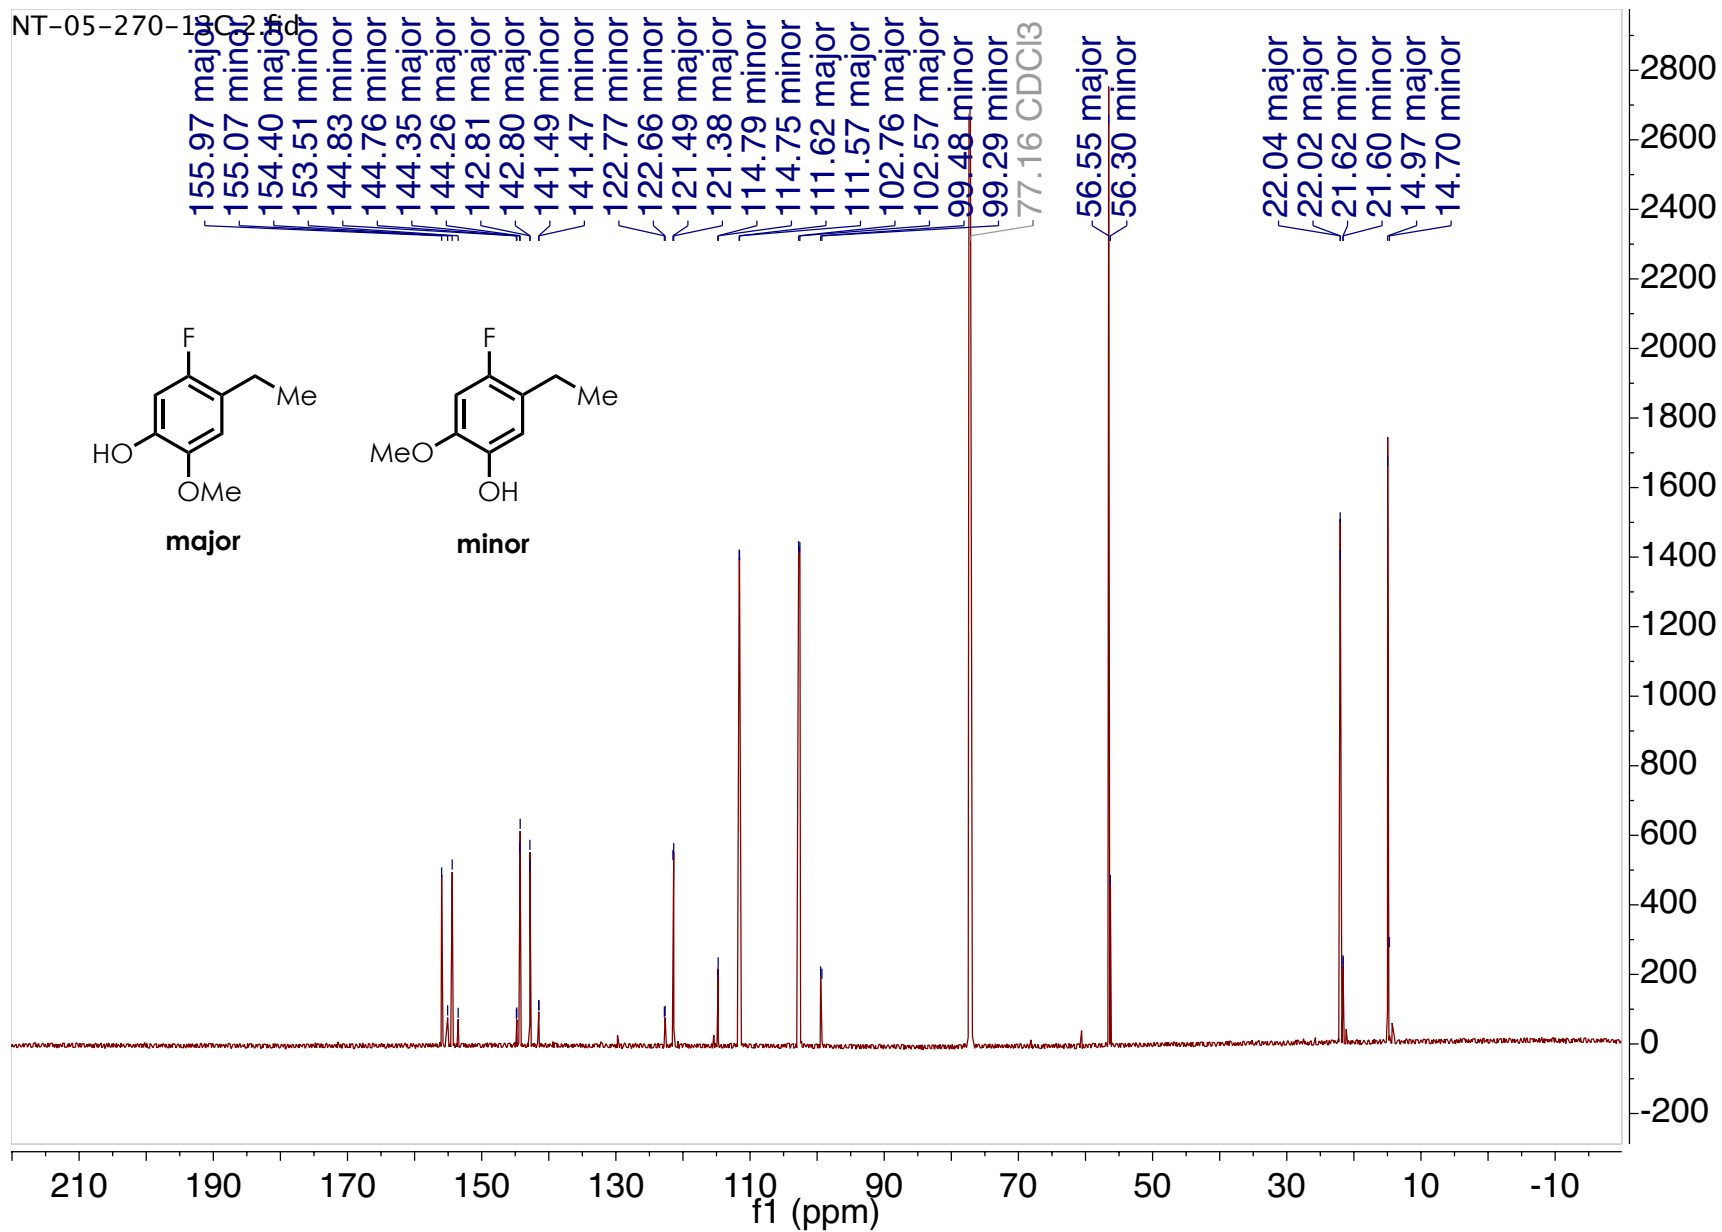

NT-05-270-19F.1.fid  
F19 CDCl<sub>3</sub> {C:\data\ntay} nmrsu 12

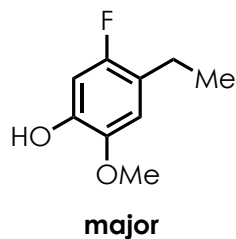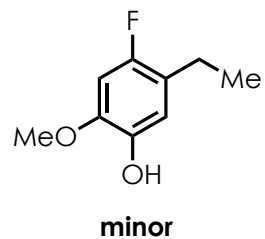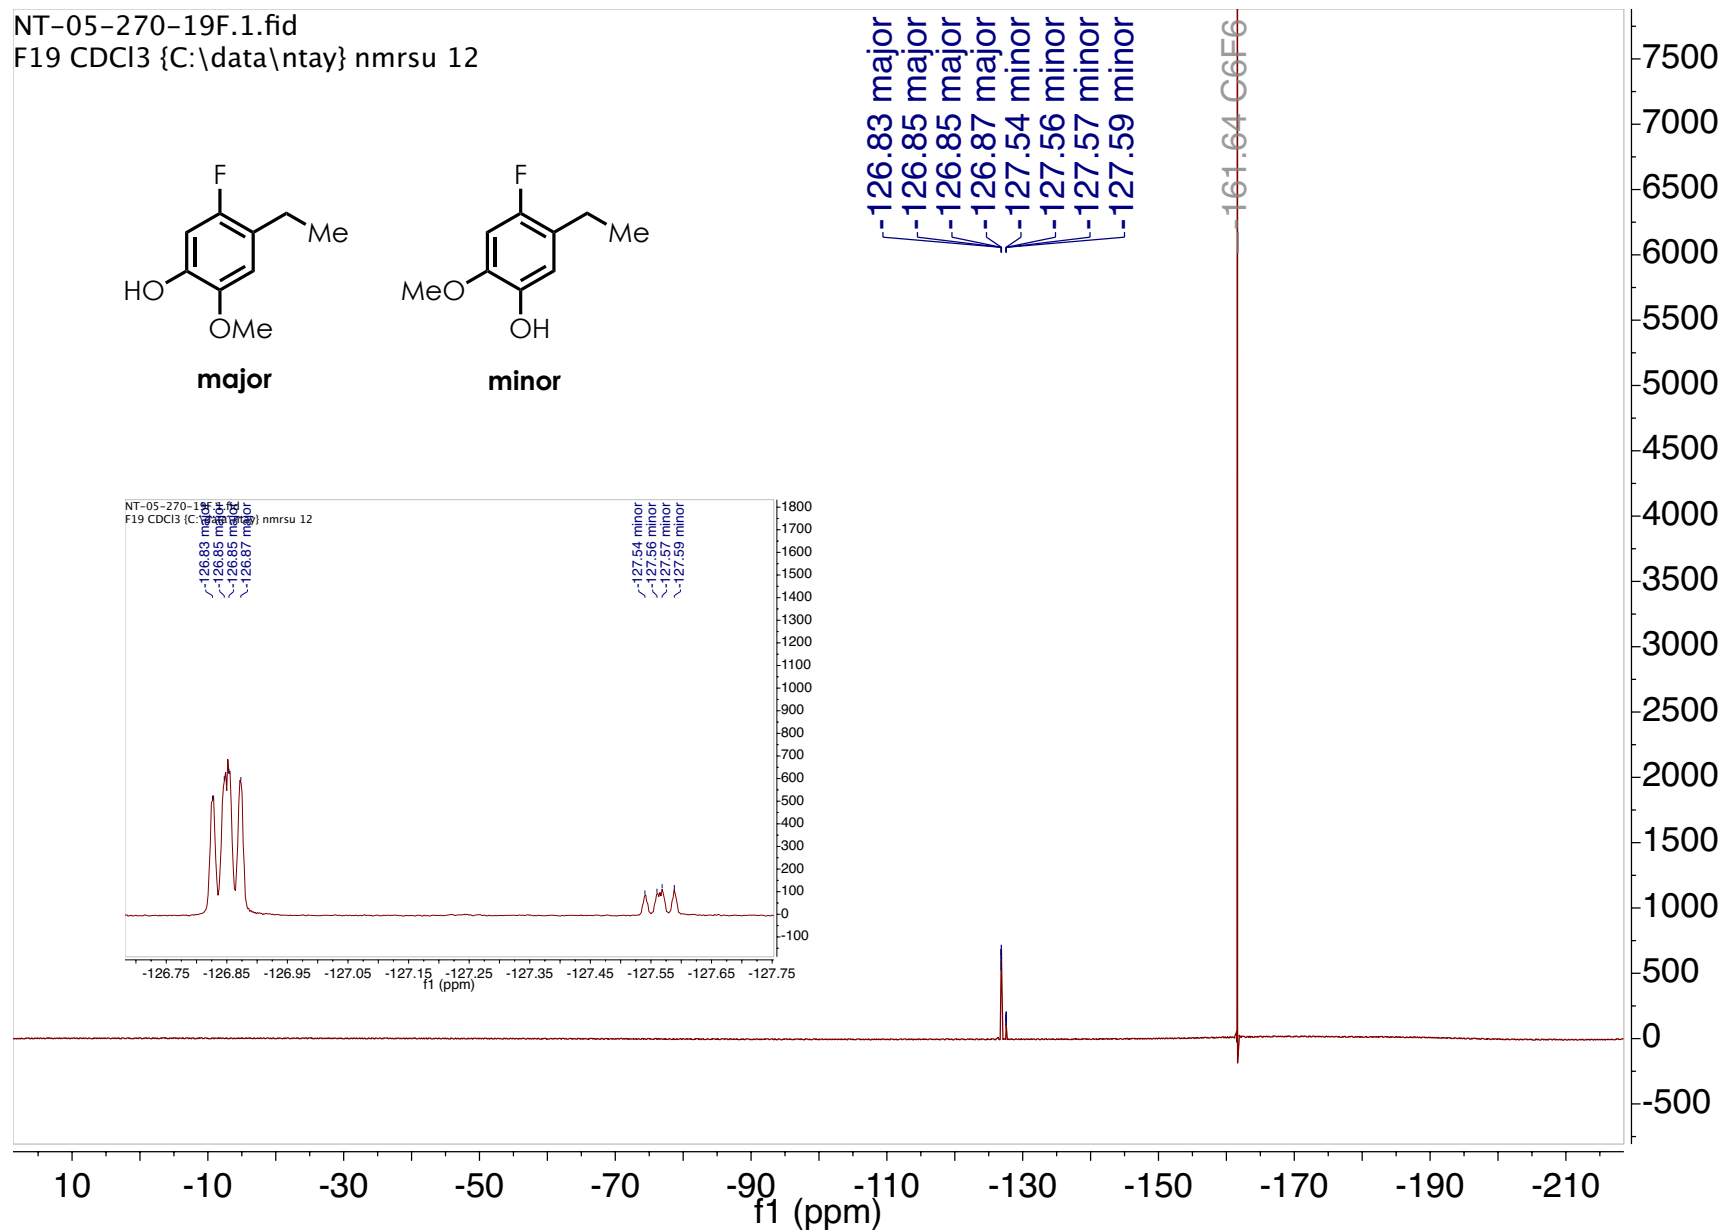

NT-5-272-1 2.1.fid  
 Nicewicz  
 C3308  
 ntay  
 NT-5-272-1

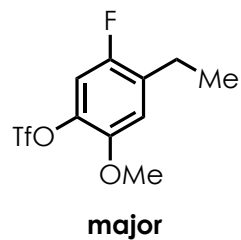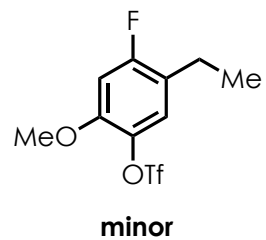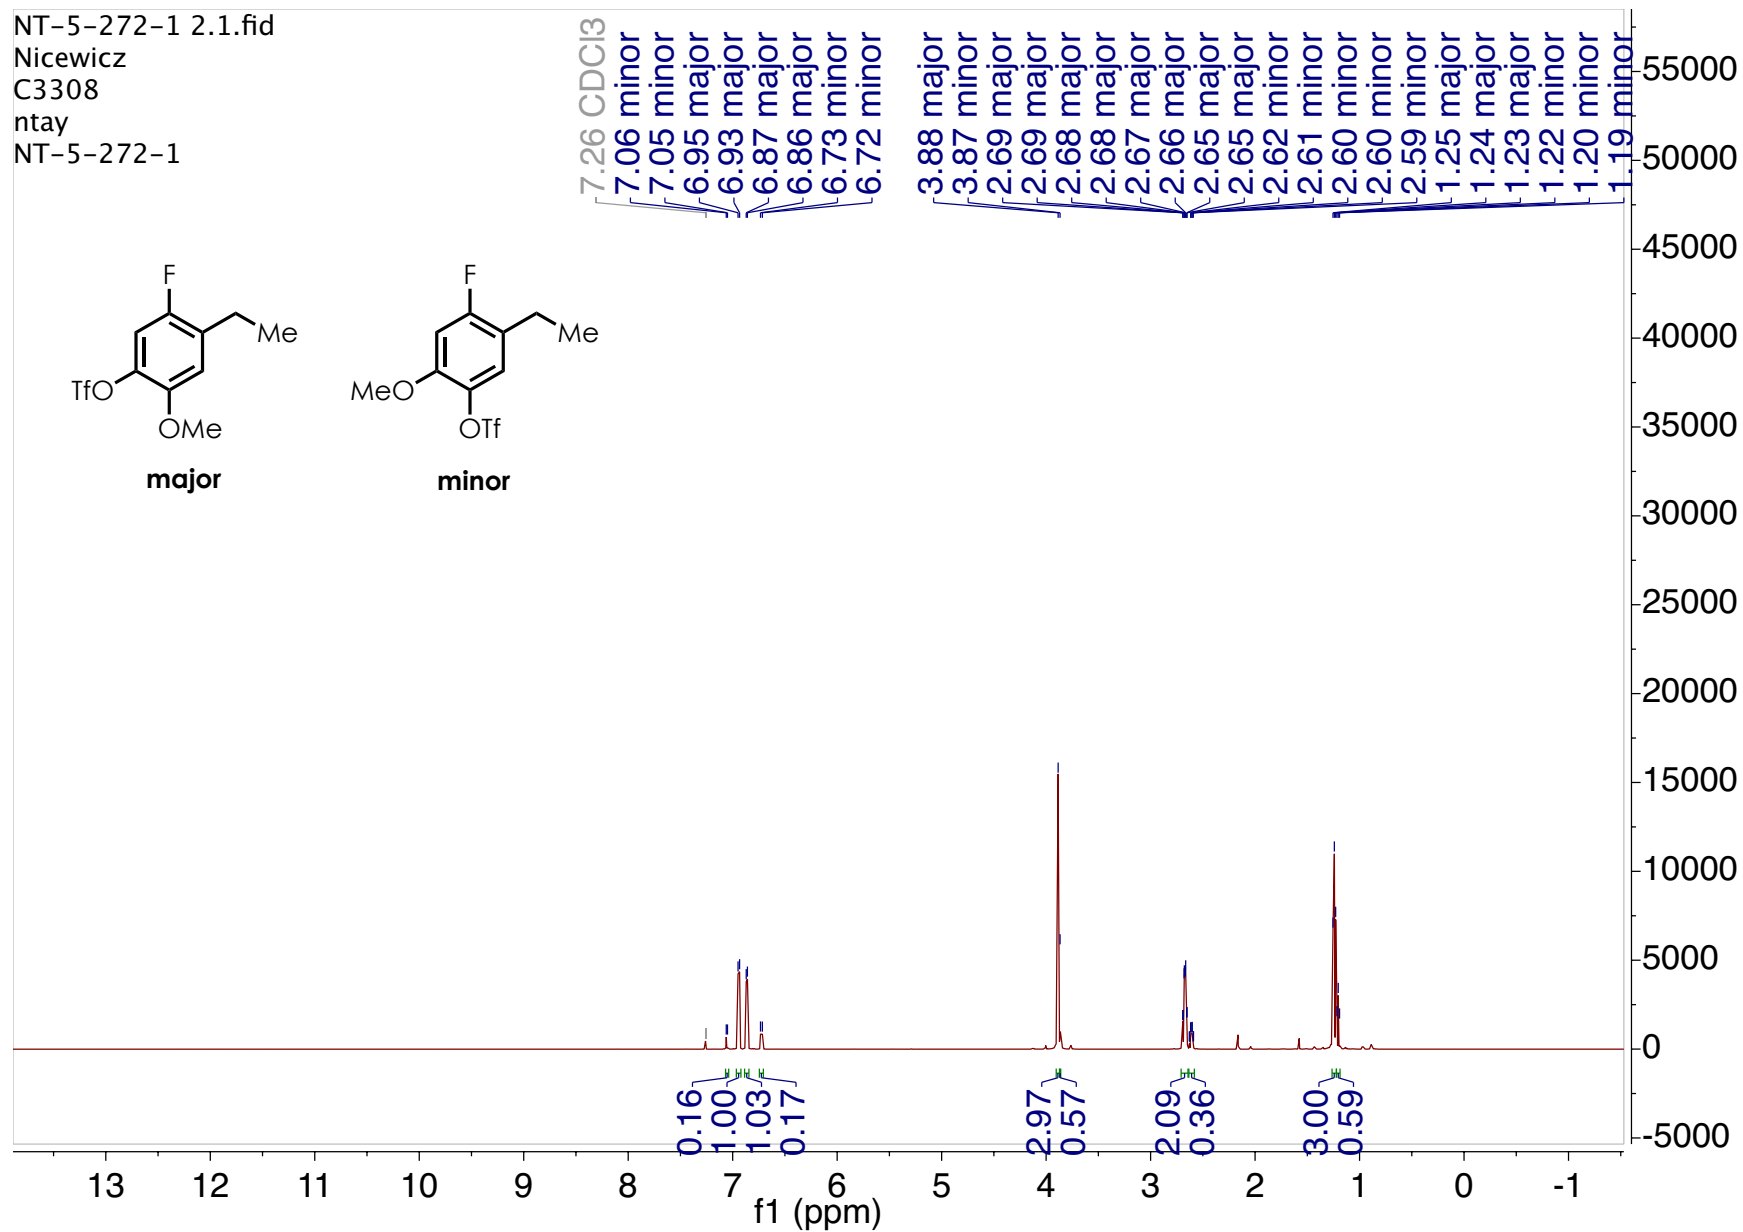

NT-5-272-1.2.fid  
 Nicewicz  
 C3308  
 ntay  
 NT-5-272-1

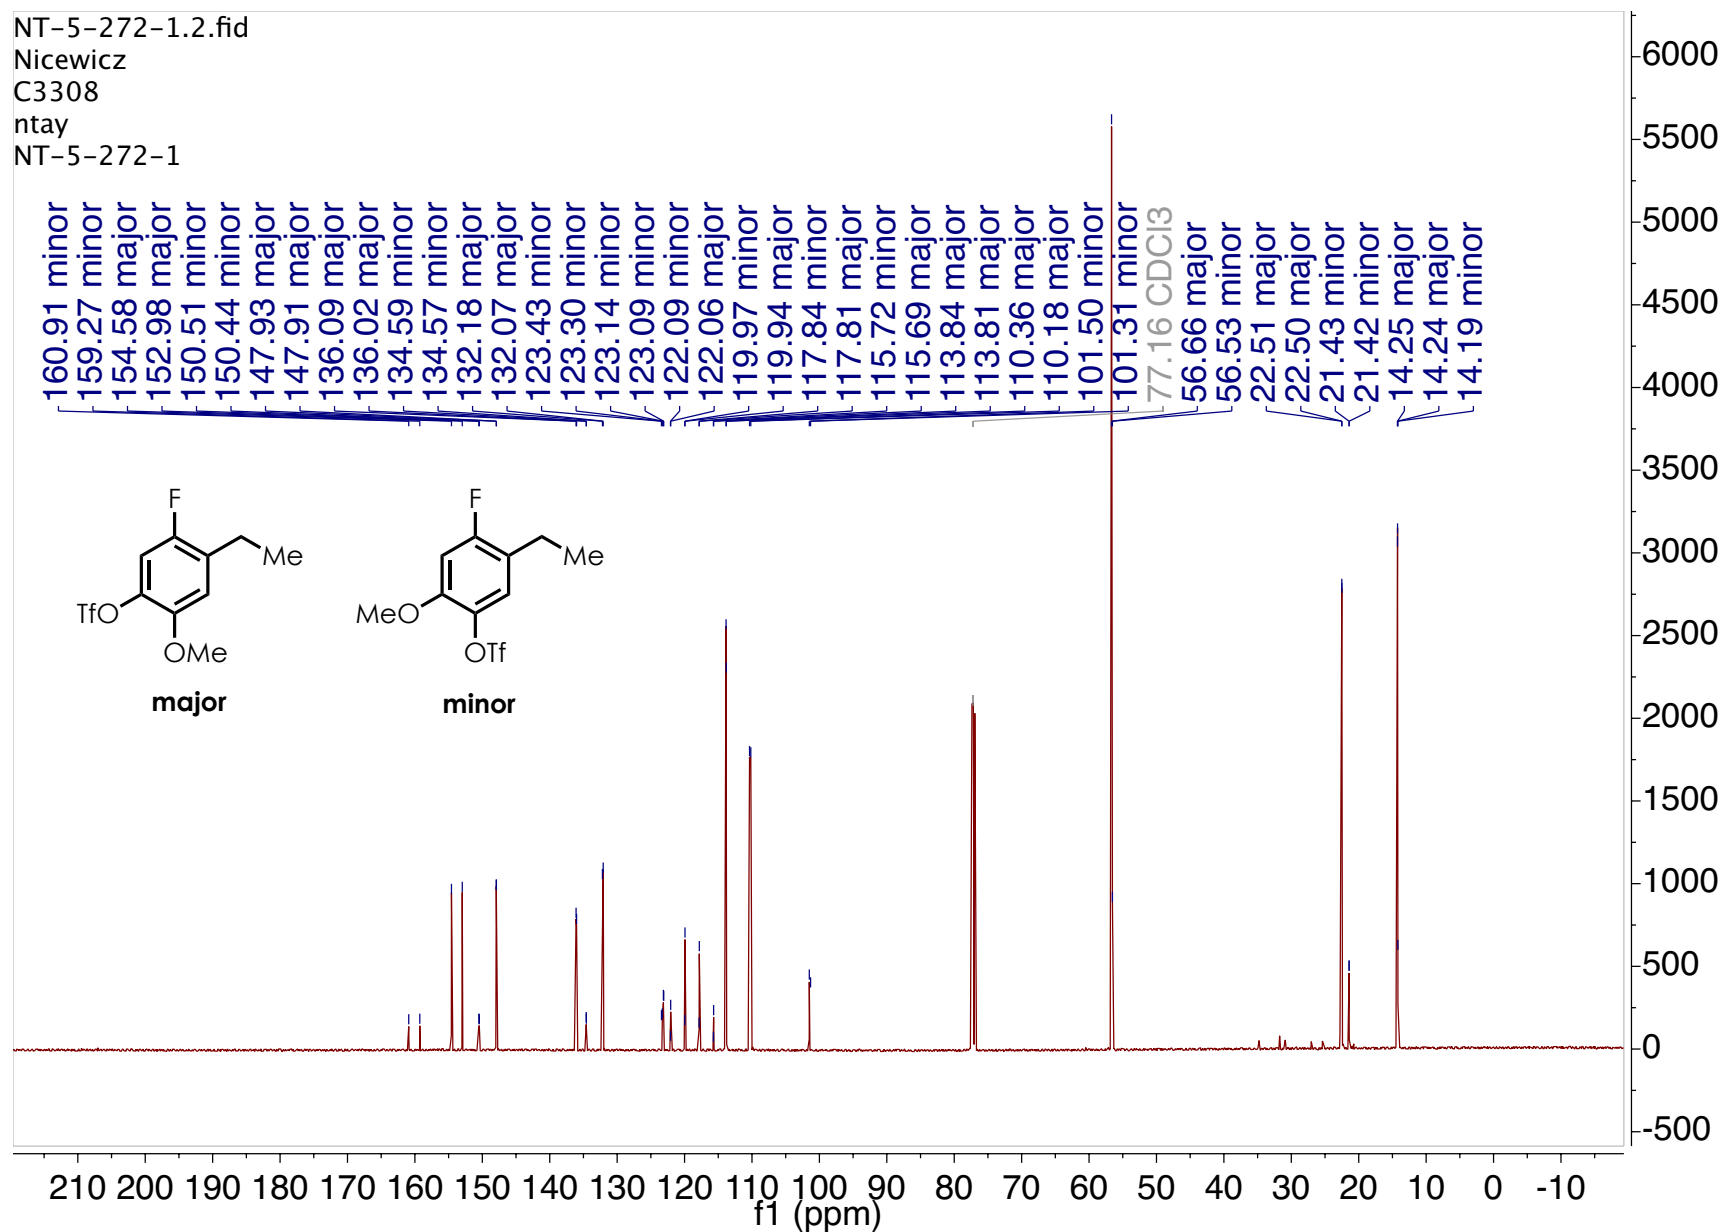

NT-05-272-19F.1.fid  
F19 CDCl3 {C:\data\ntay} nmrsu 13

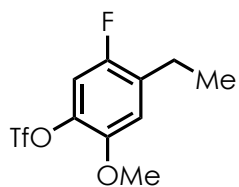

major

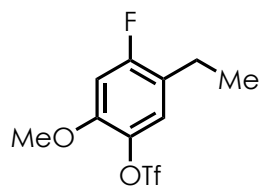

minor

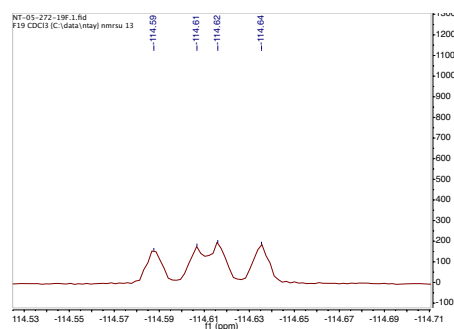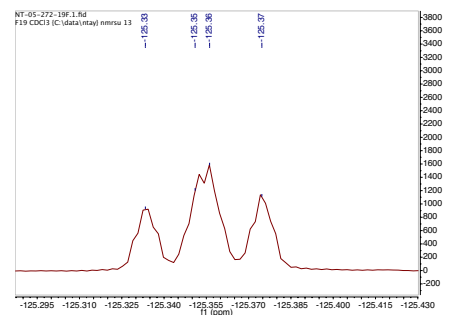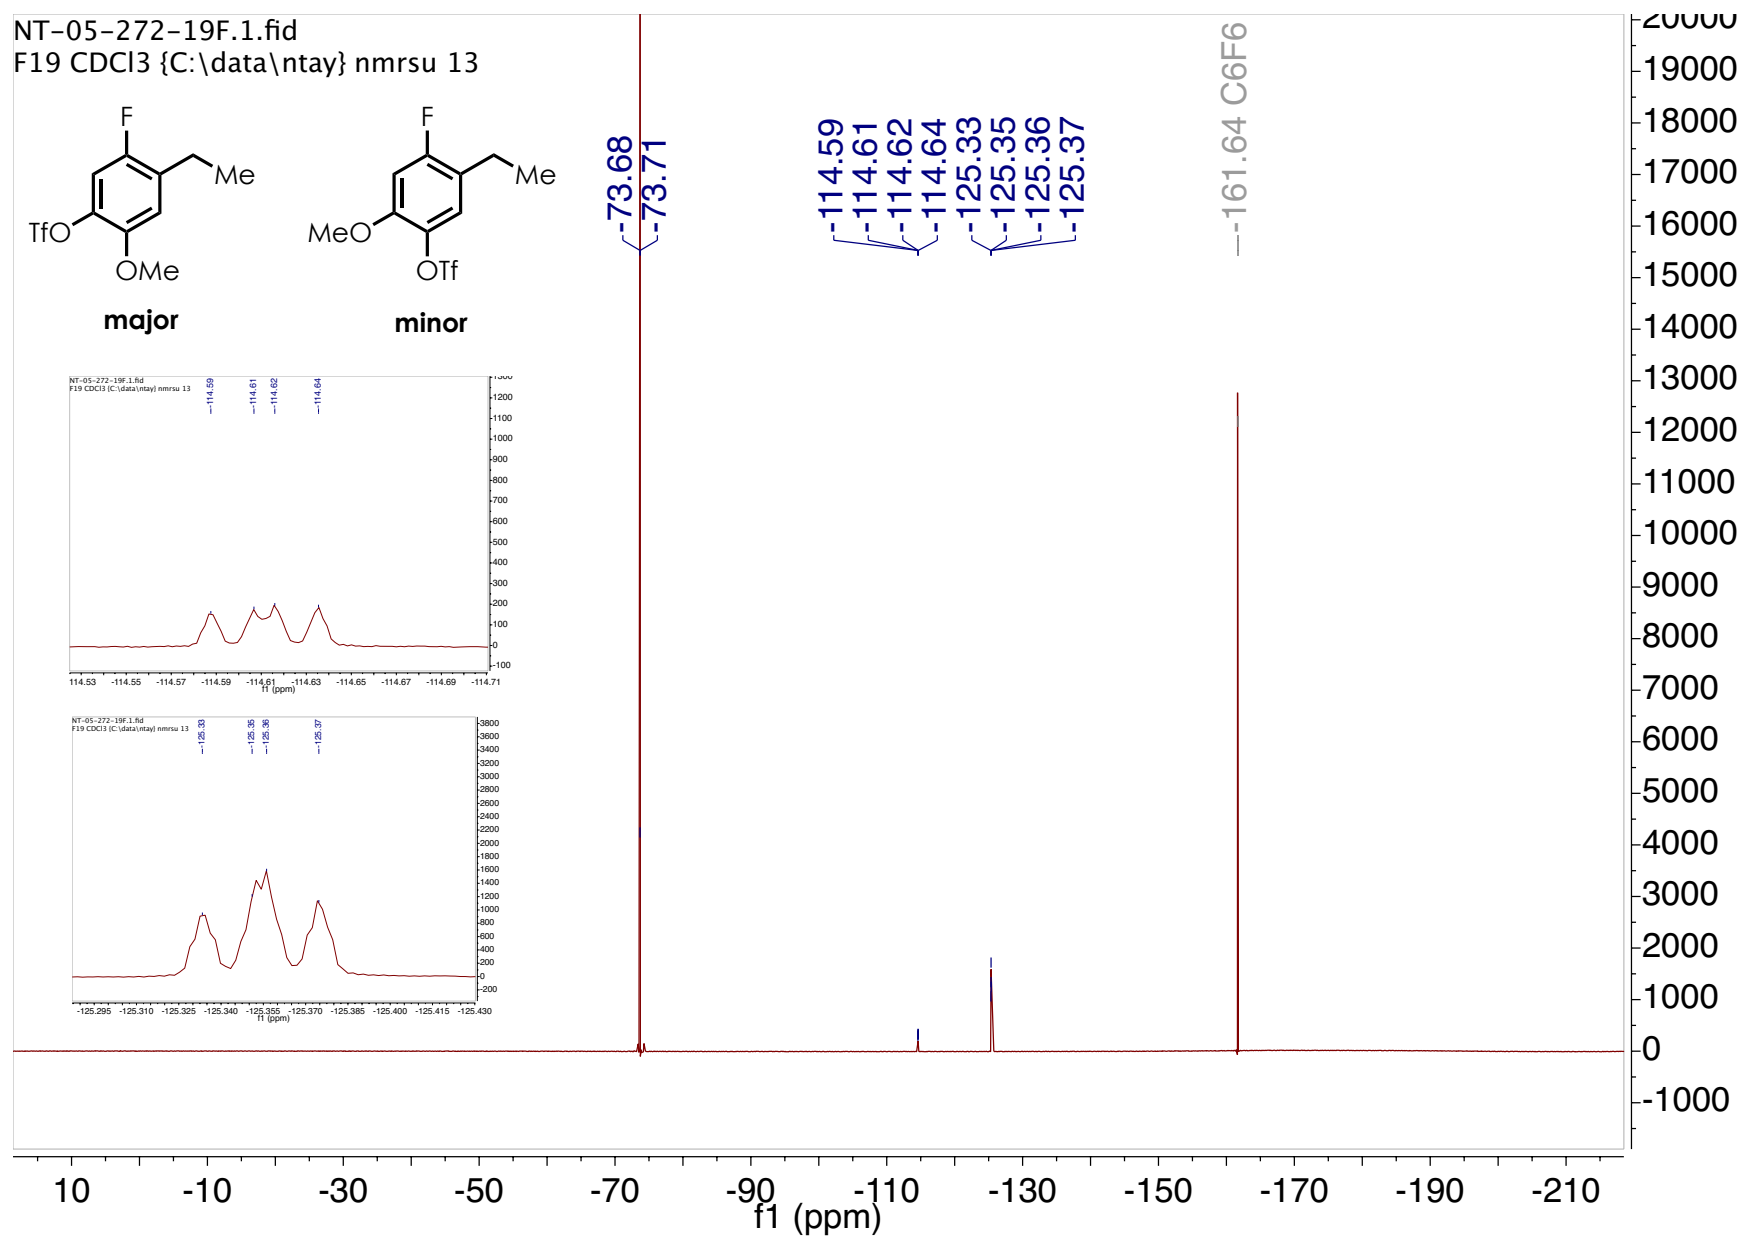

NT-06-14.1.fid  
Nicewicz  
5110718  
ntay  
NT-06-14

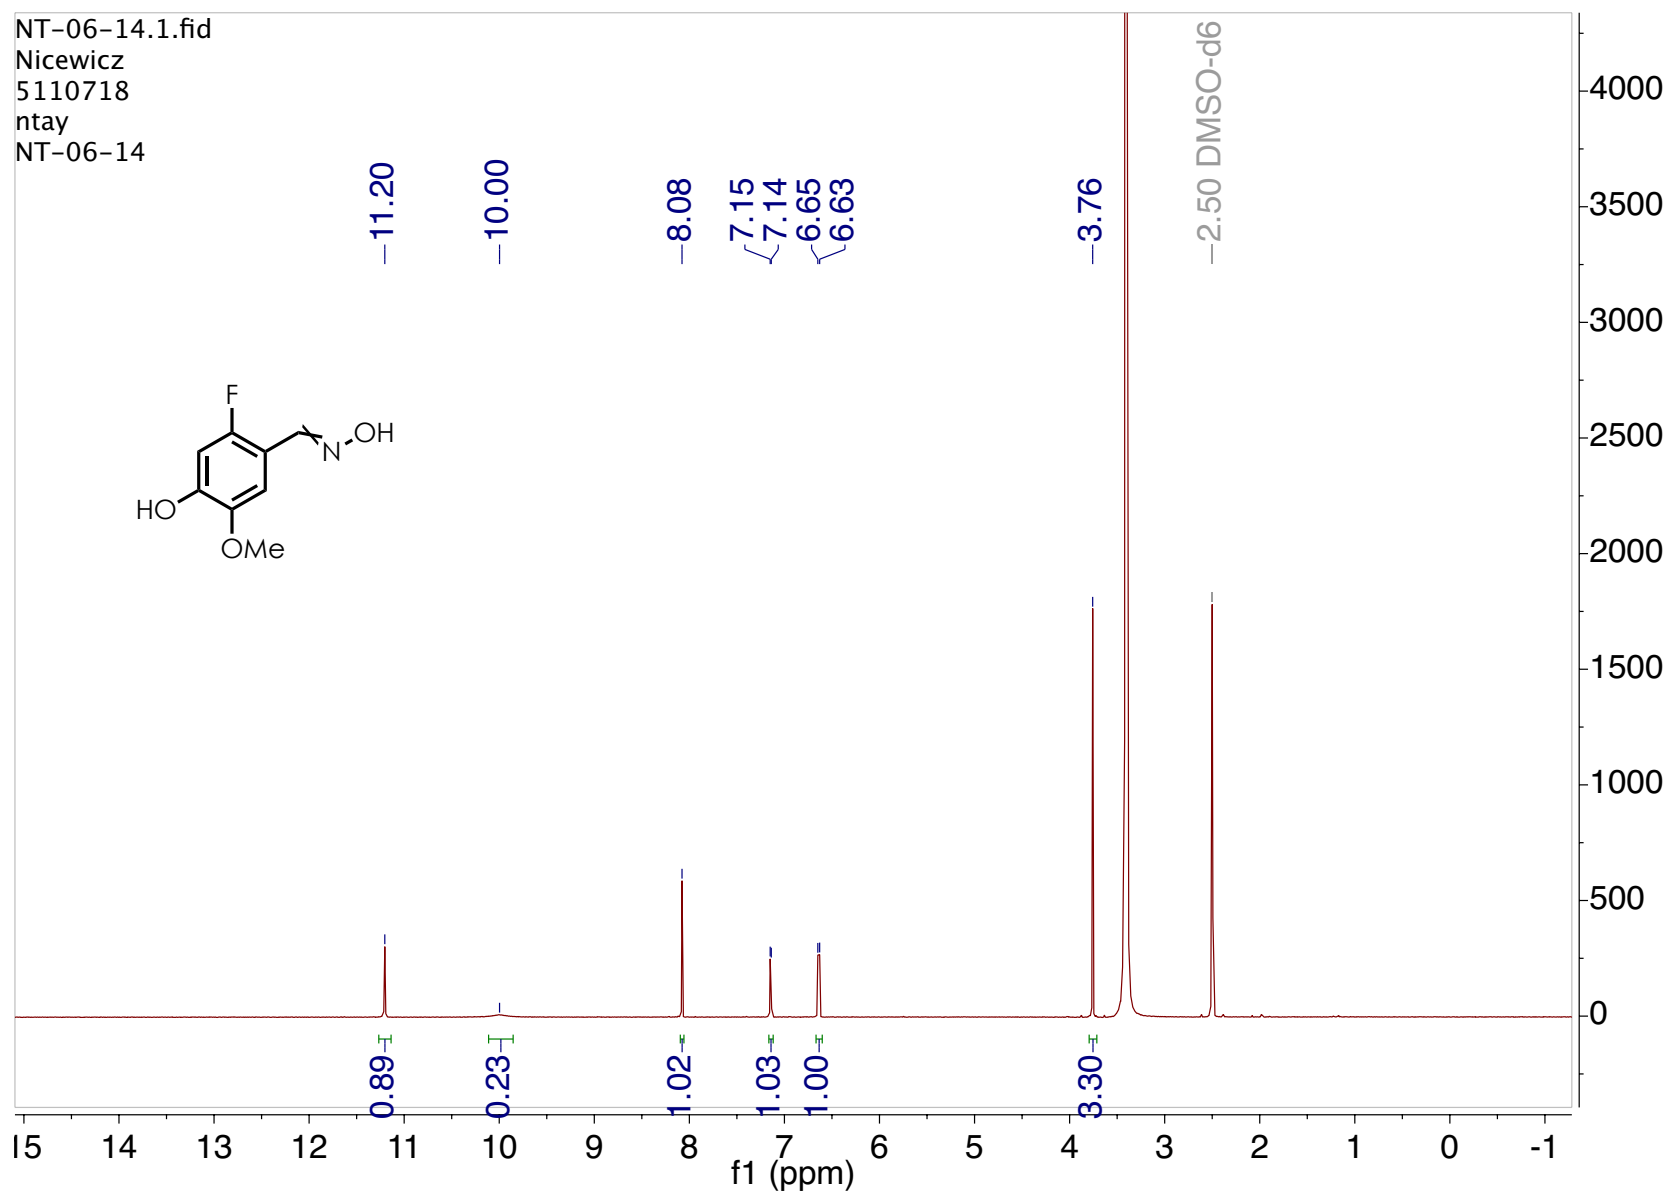

NT-06-14-13C.1.fid

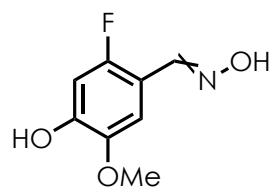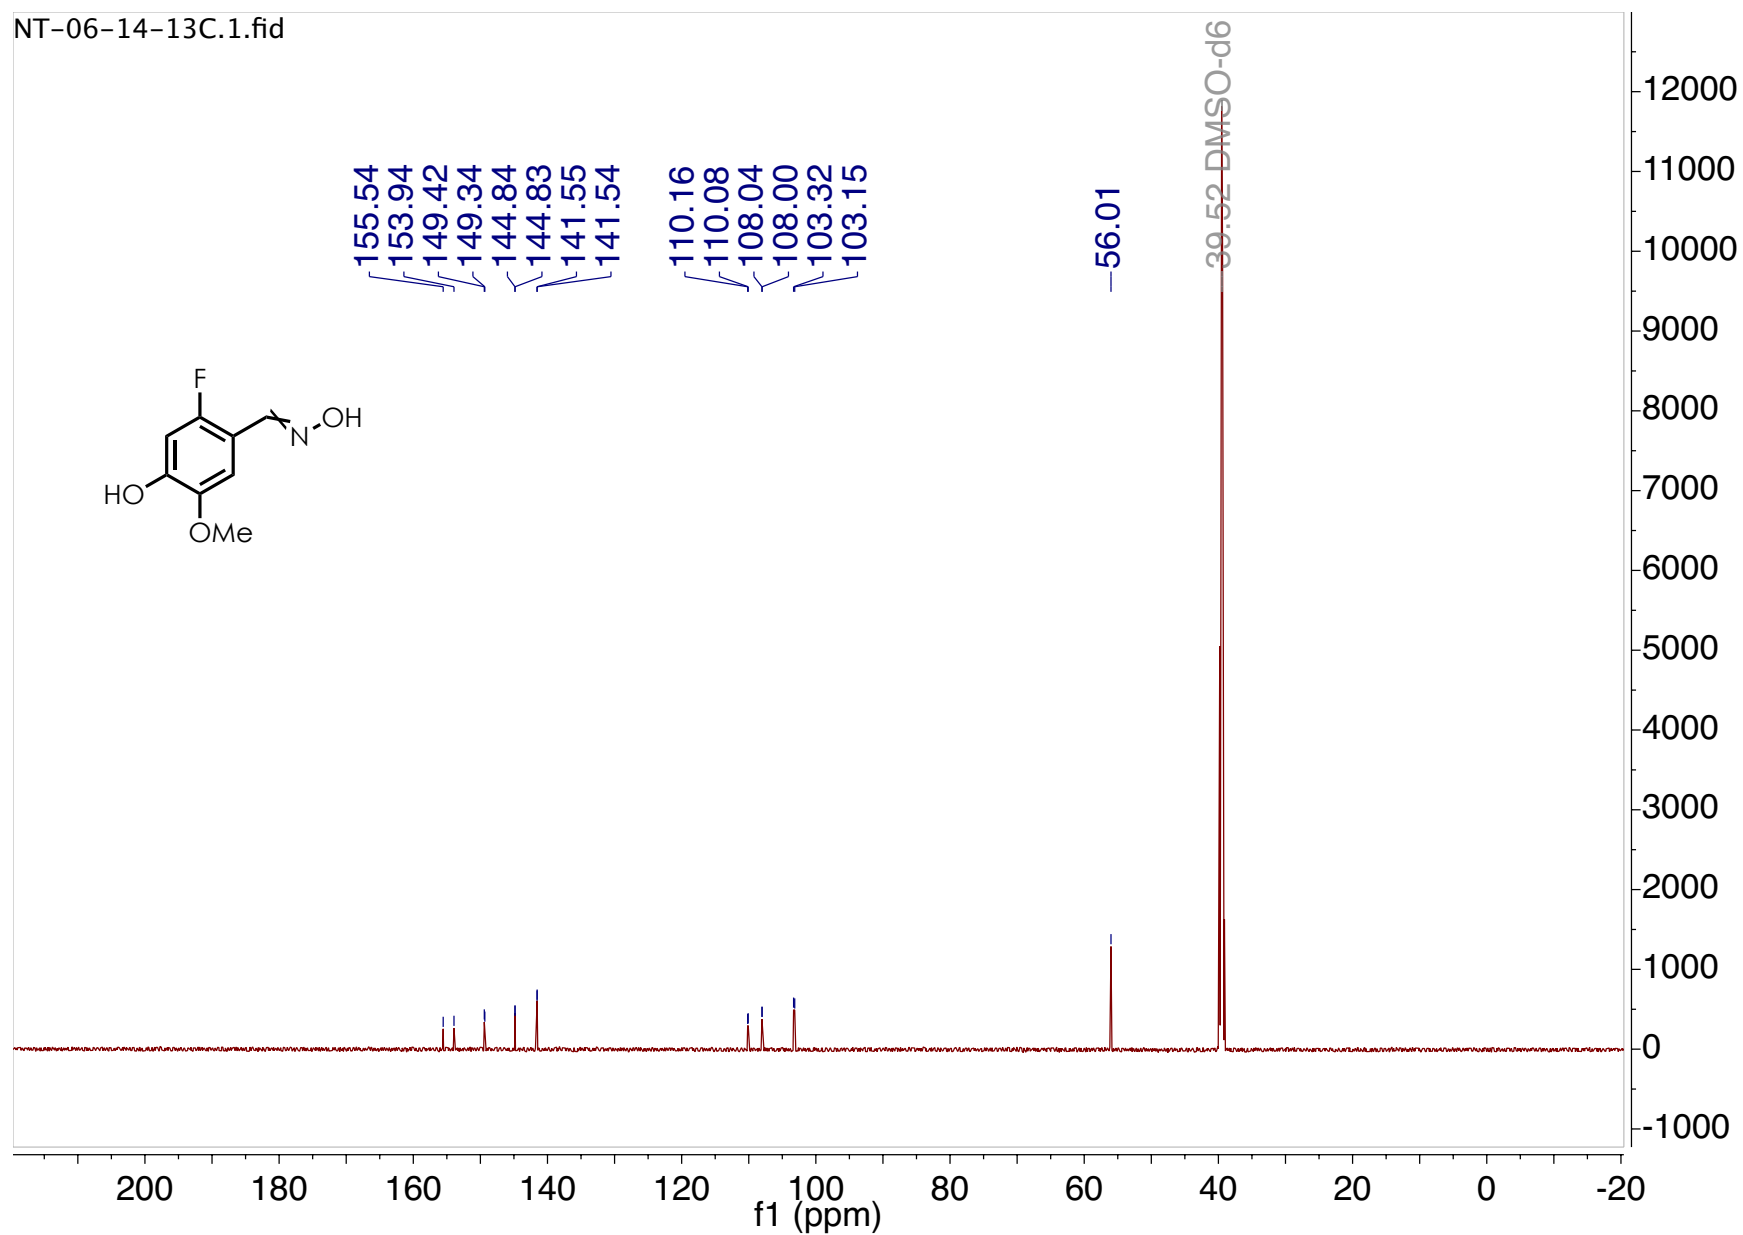

NT-06-14-19F 2.1.fid  
F19 DMSO {C:\data\ntay} nmrsu 57

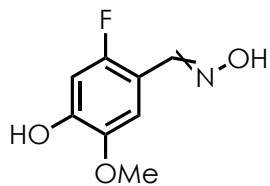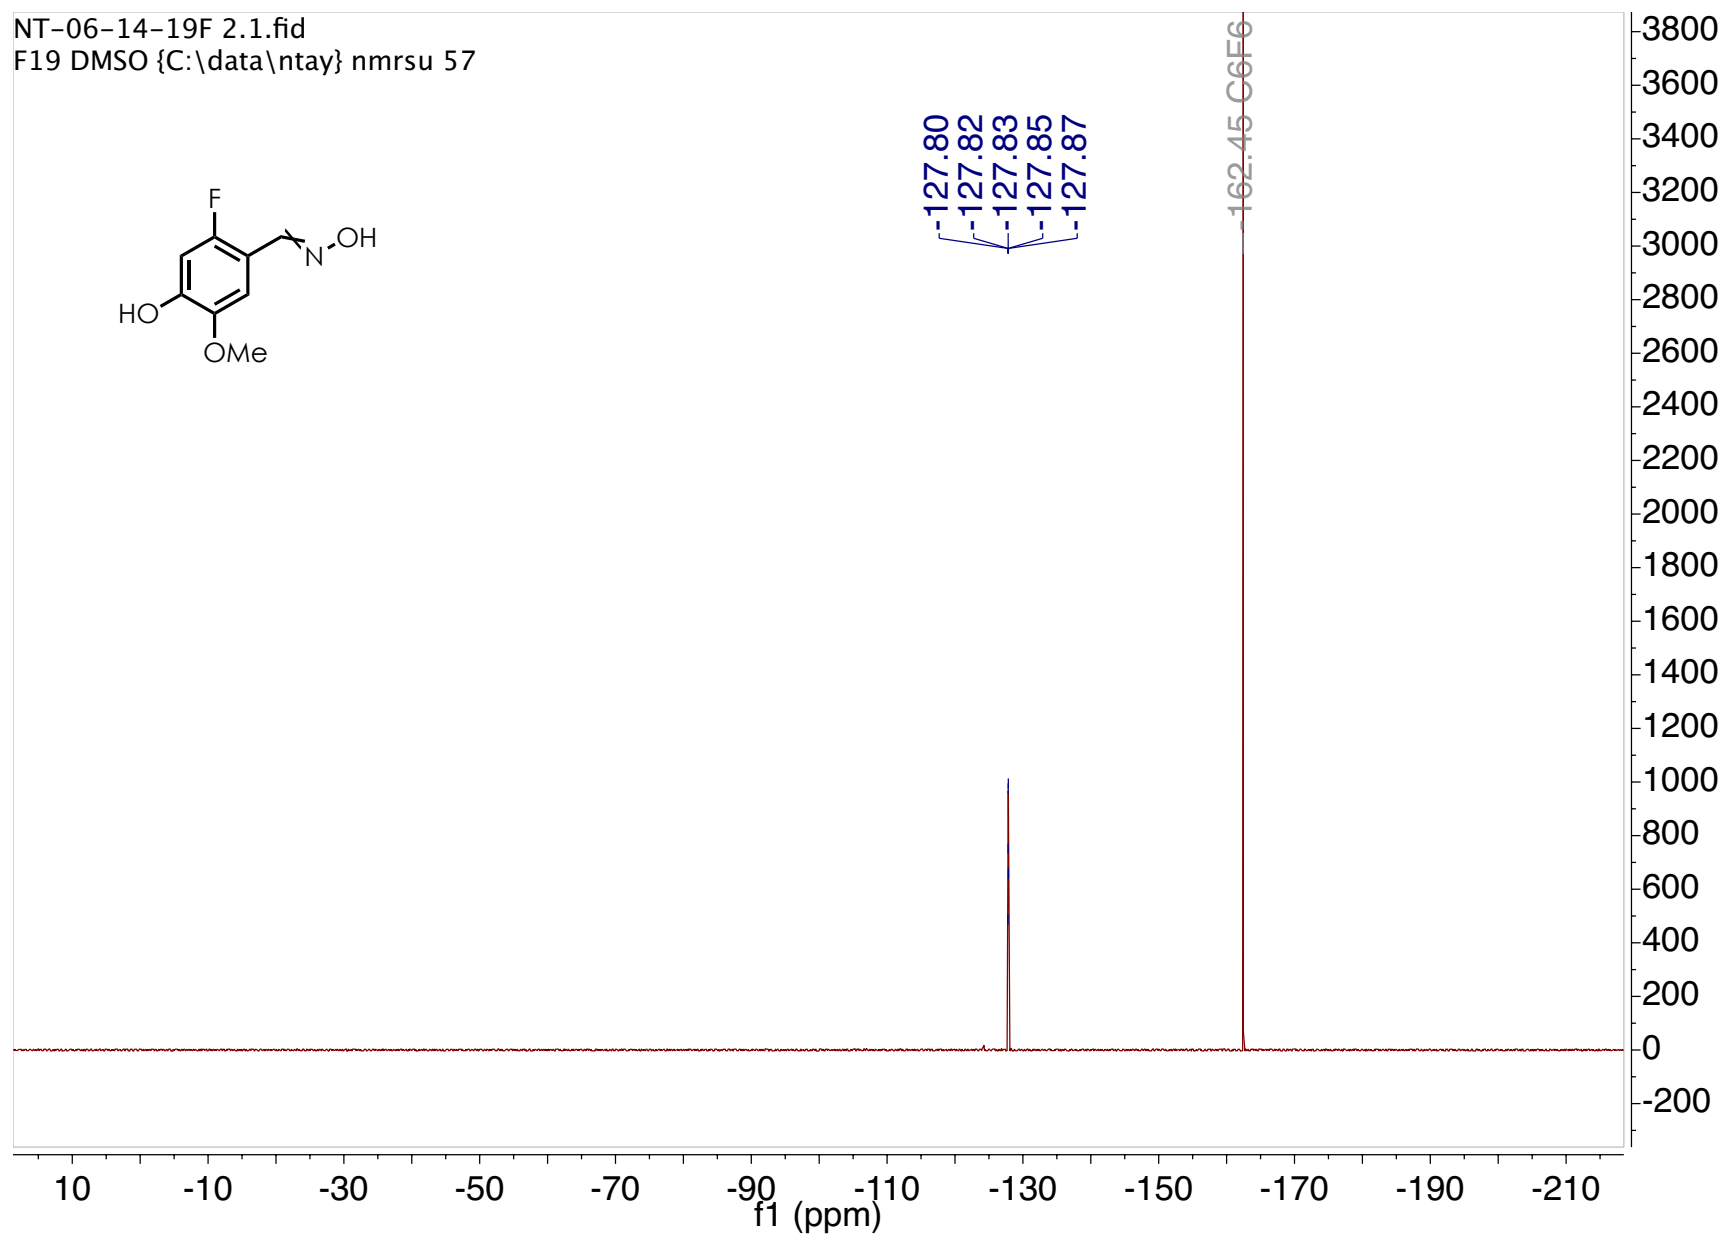

NT-06-17.1.fid  
Nicewicz  
5110718  
ntay  
NT-06-17

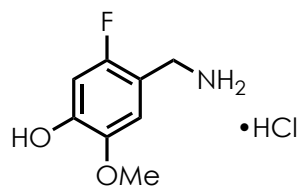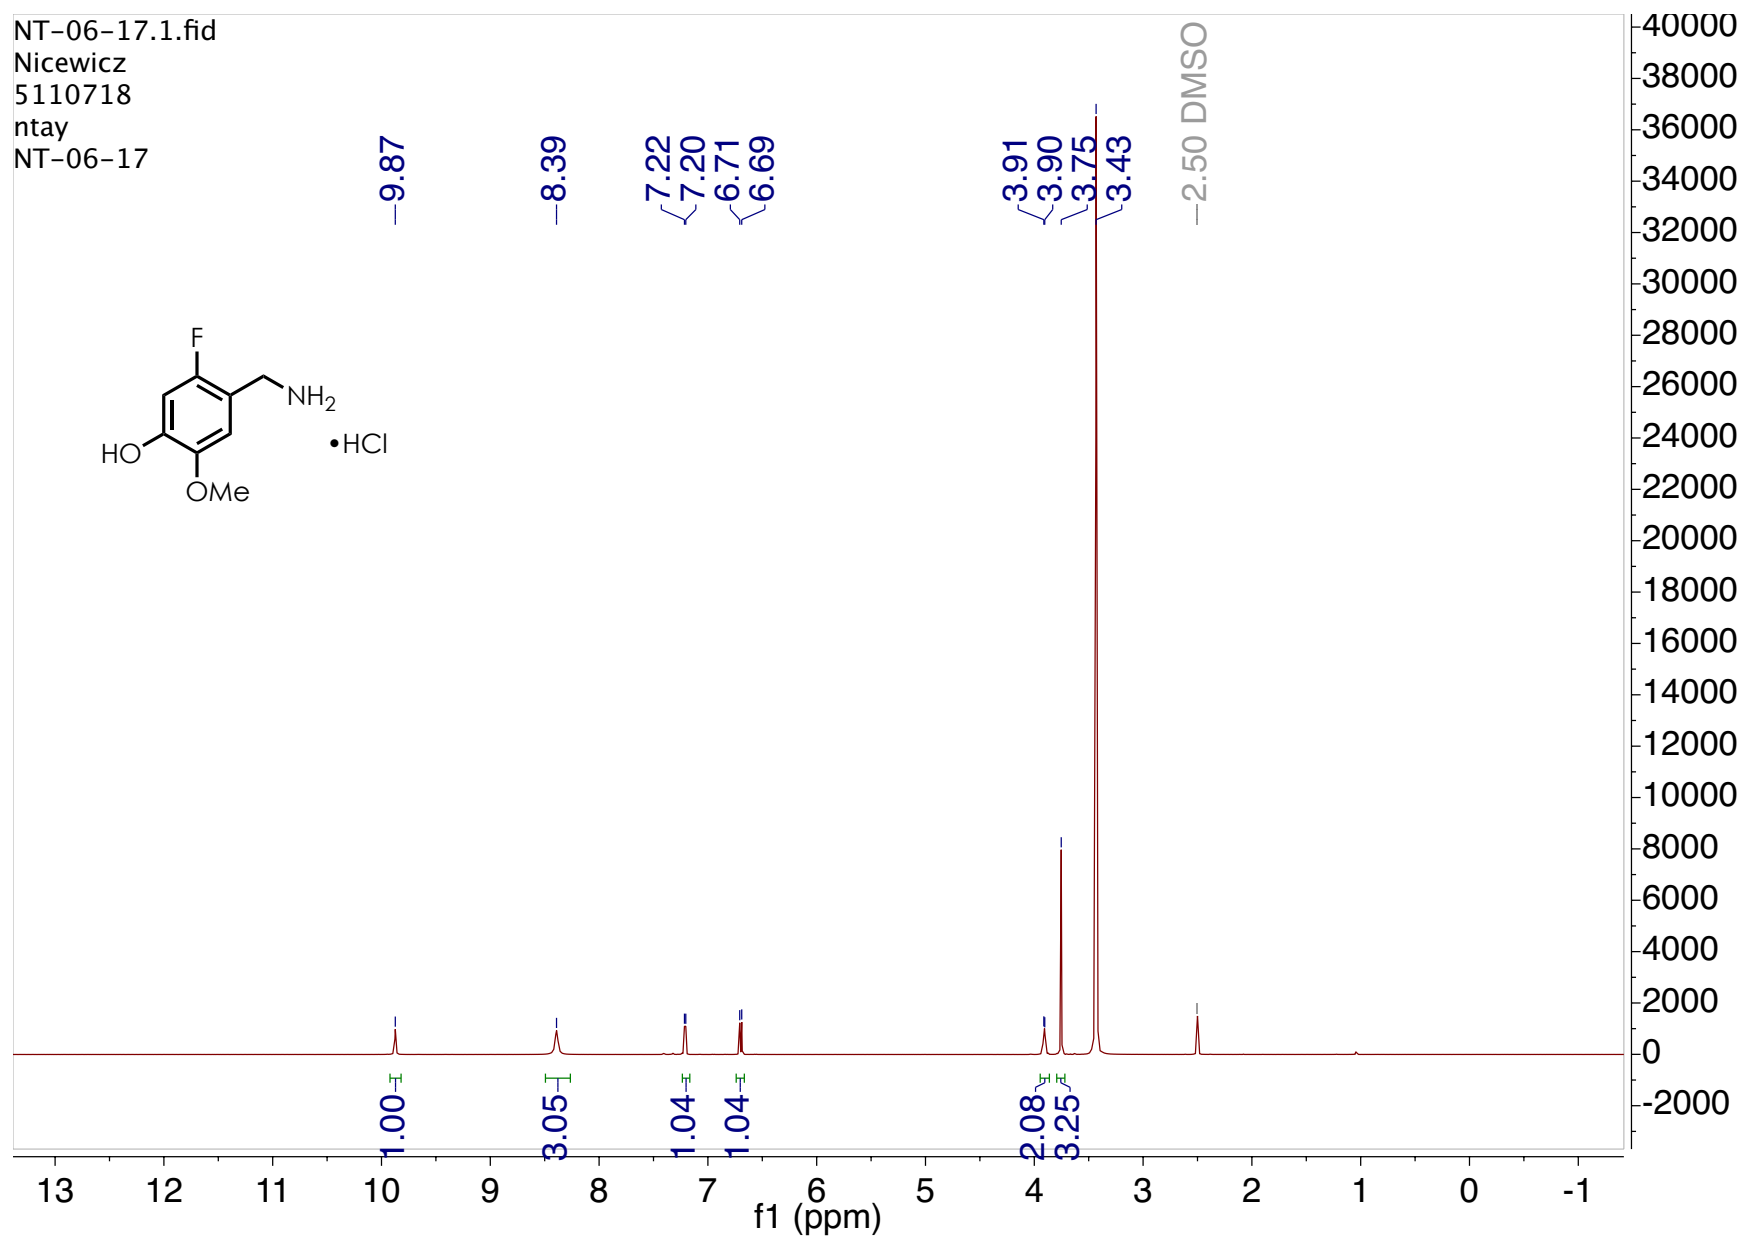

NT-06-17-13C.1.fid

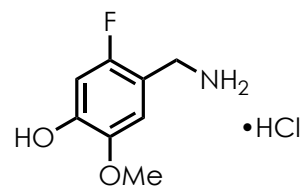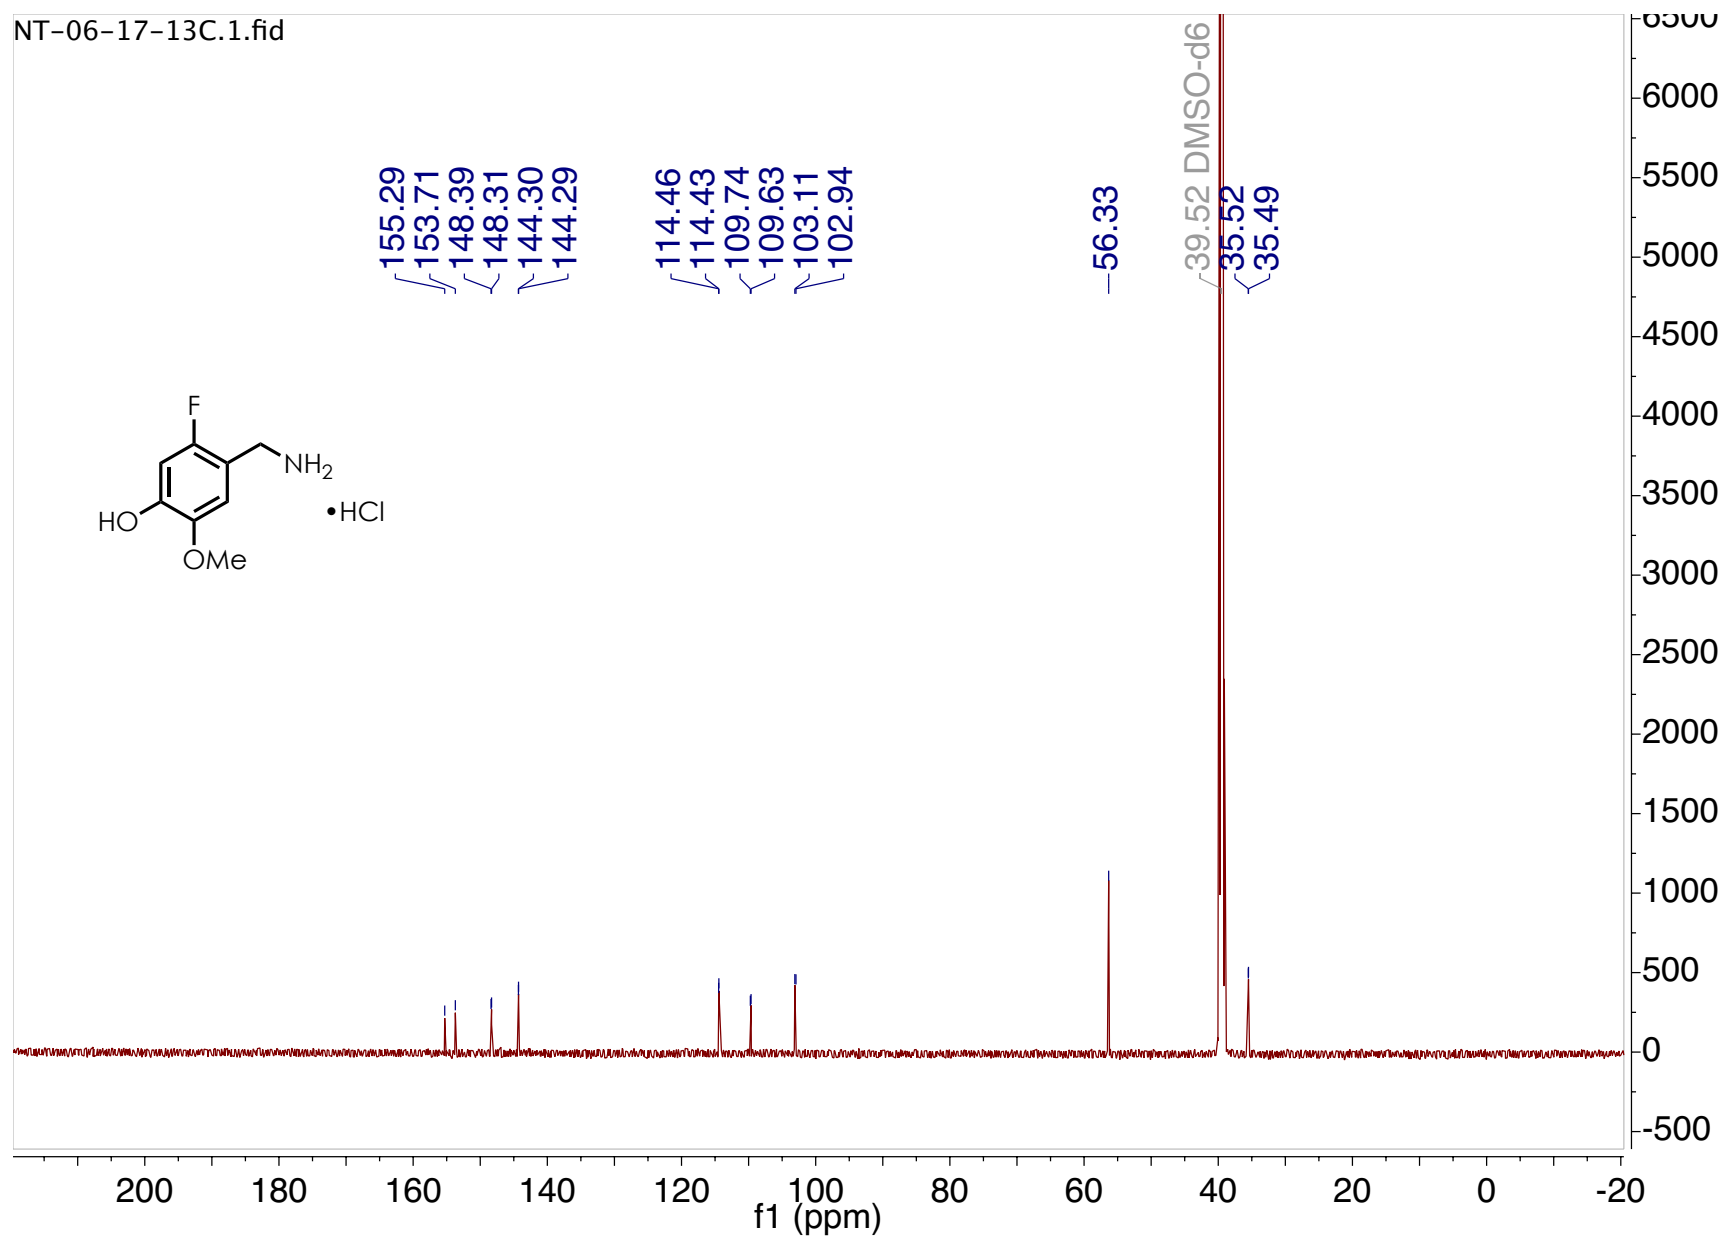

NT-06-17-19F.1.fid

F19 DMSO {C:\data\ntay} nmrsu 53

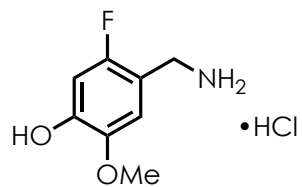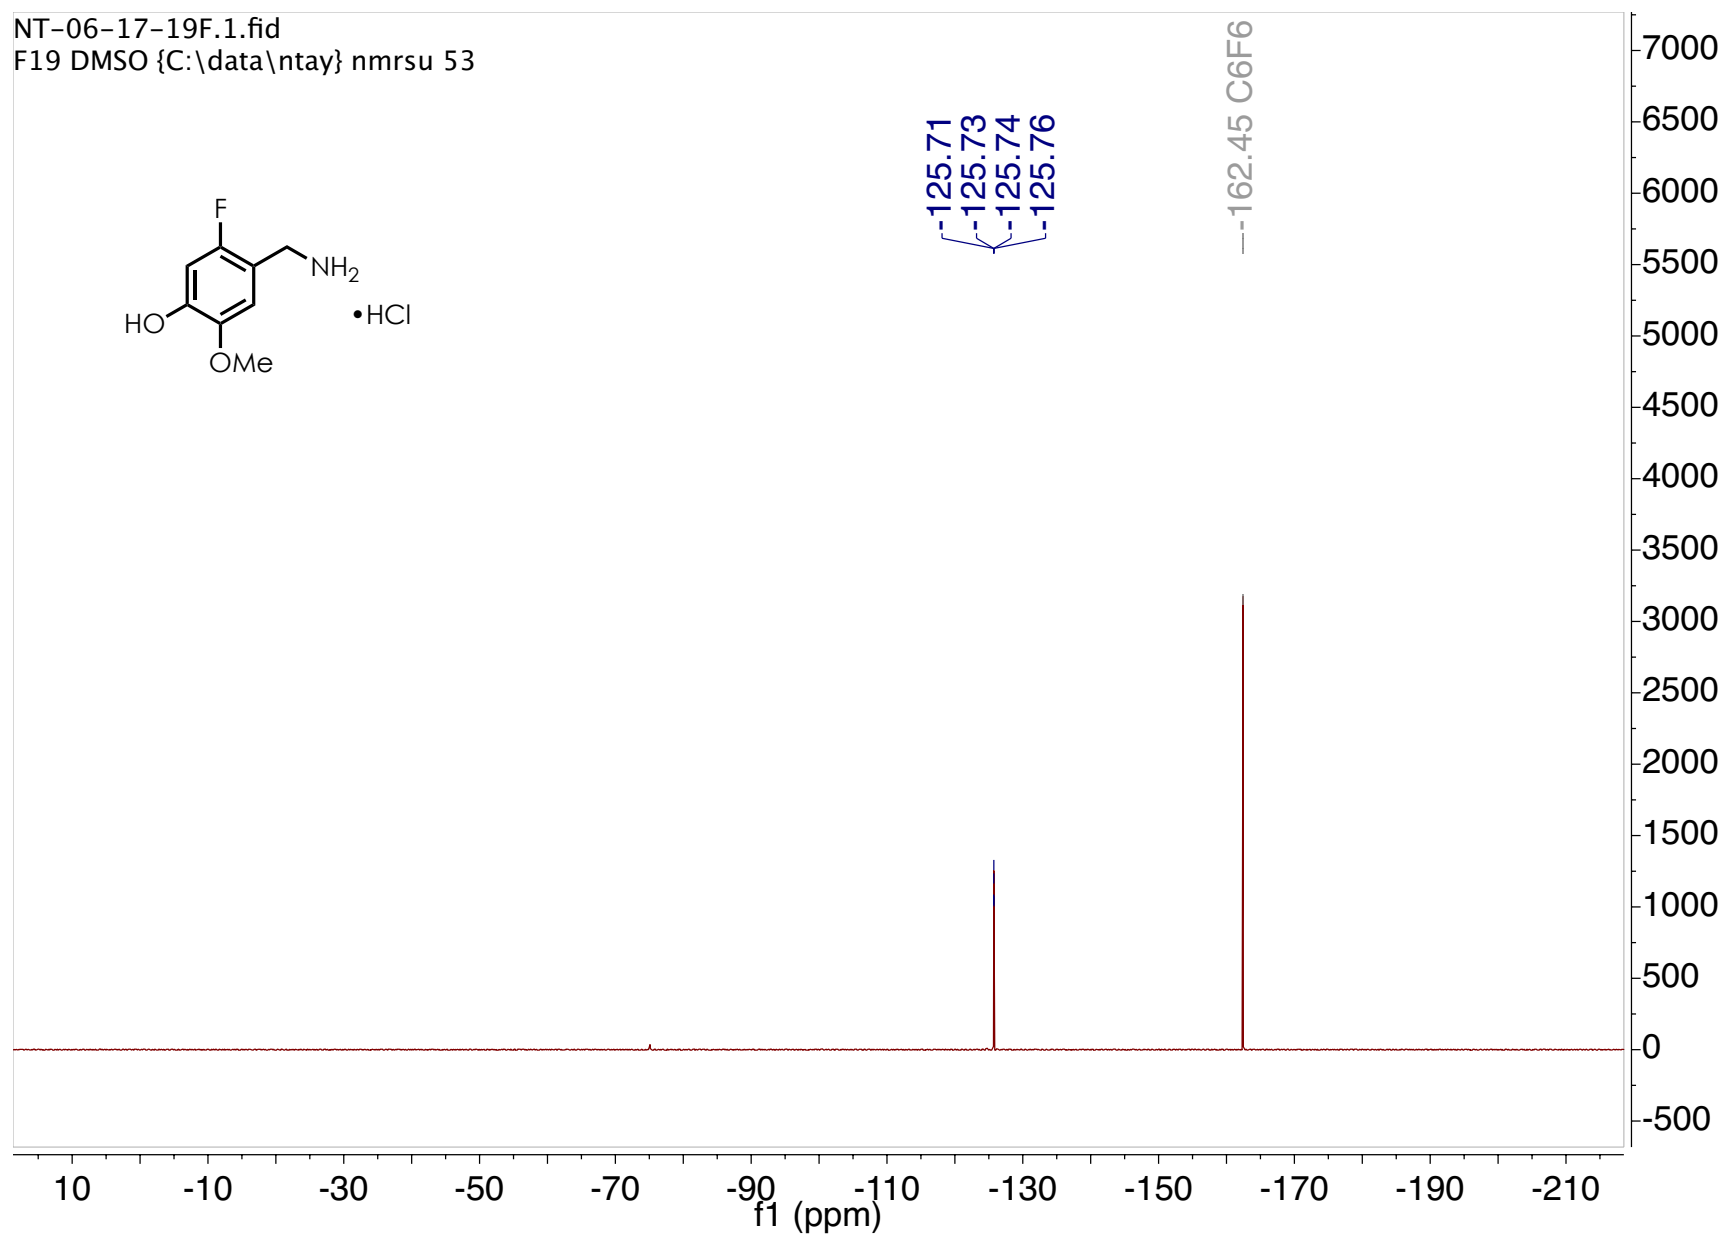

NT-06-20-1H.1.fid  
NT-06-20-1H

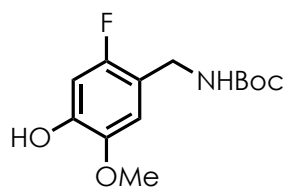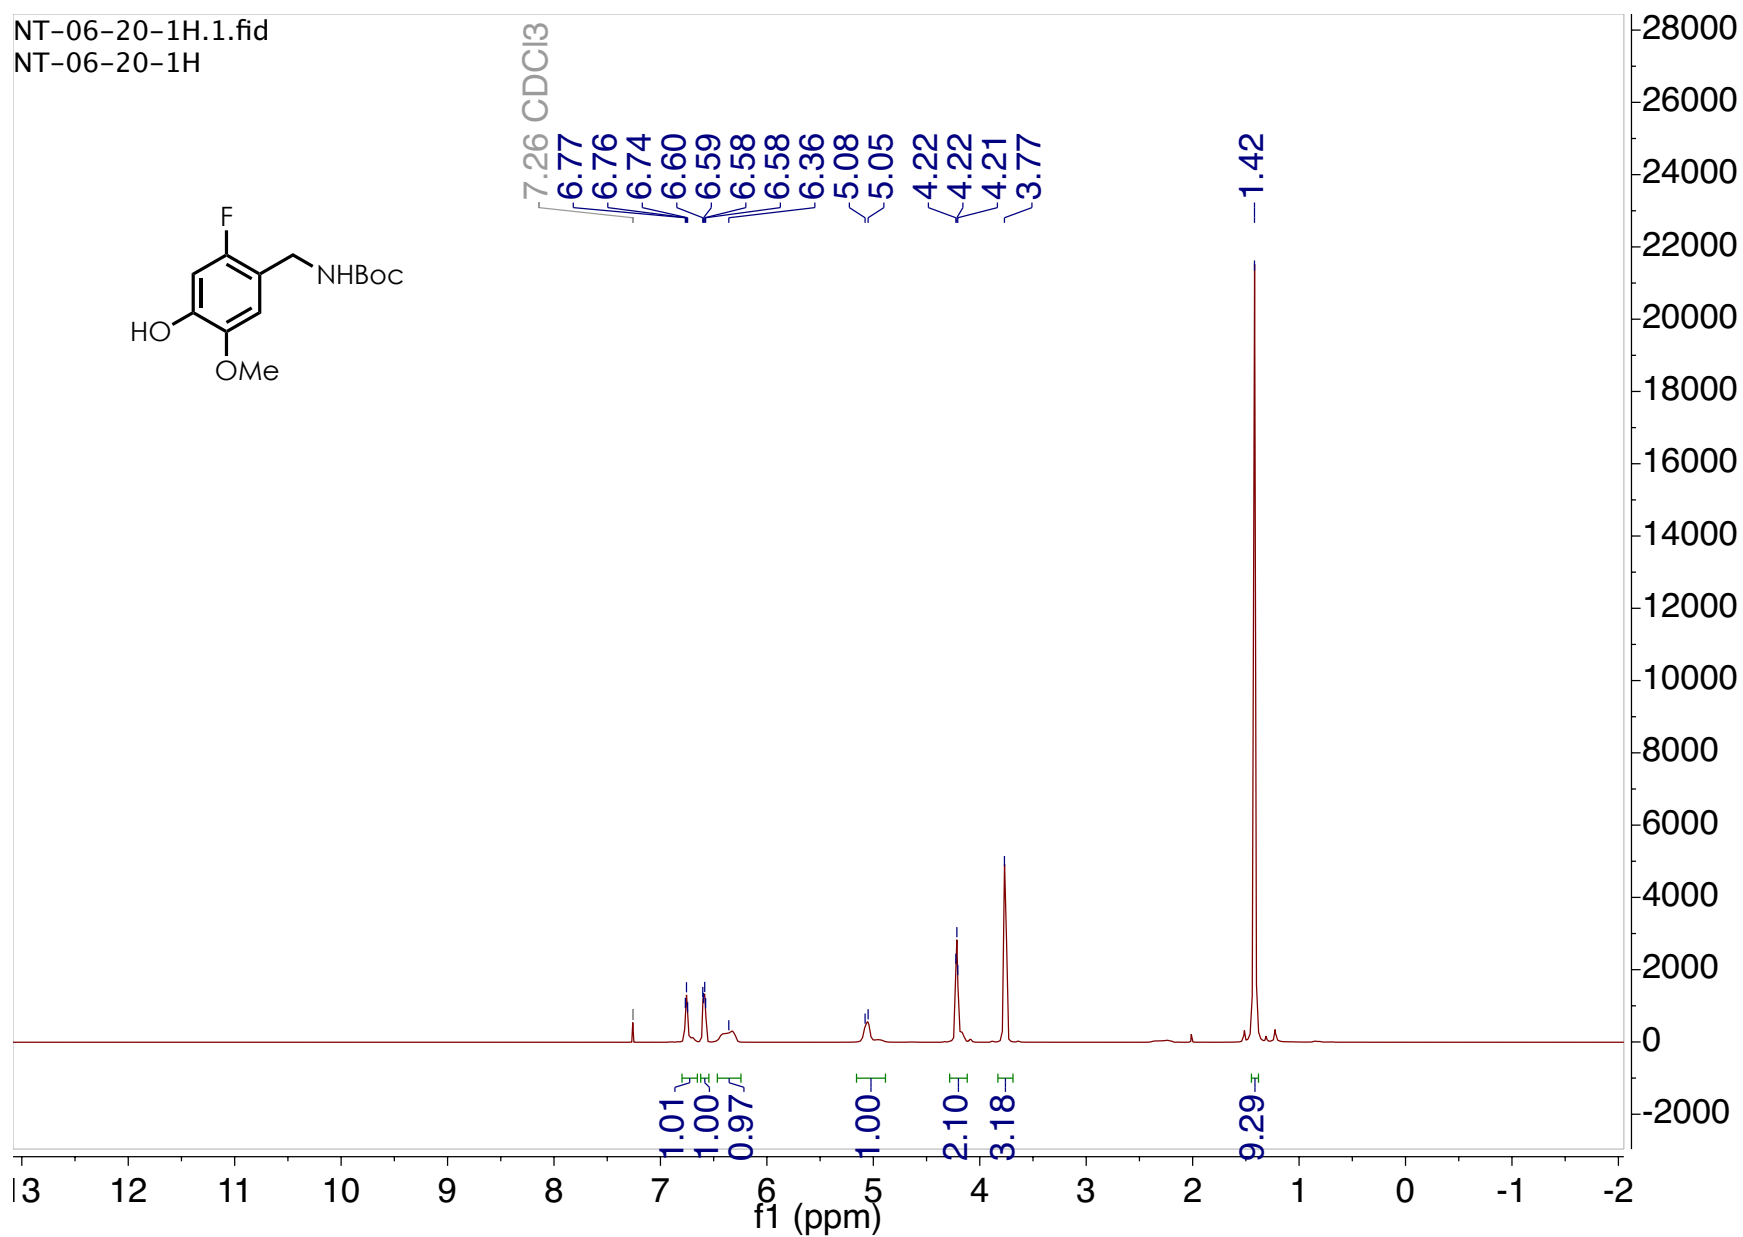

NT-06-20.2.fid  
Nicewicz  
5110718  
ntay  
NT-06-20

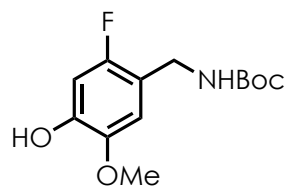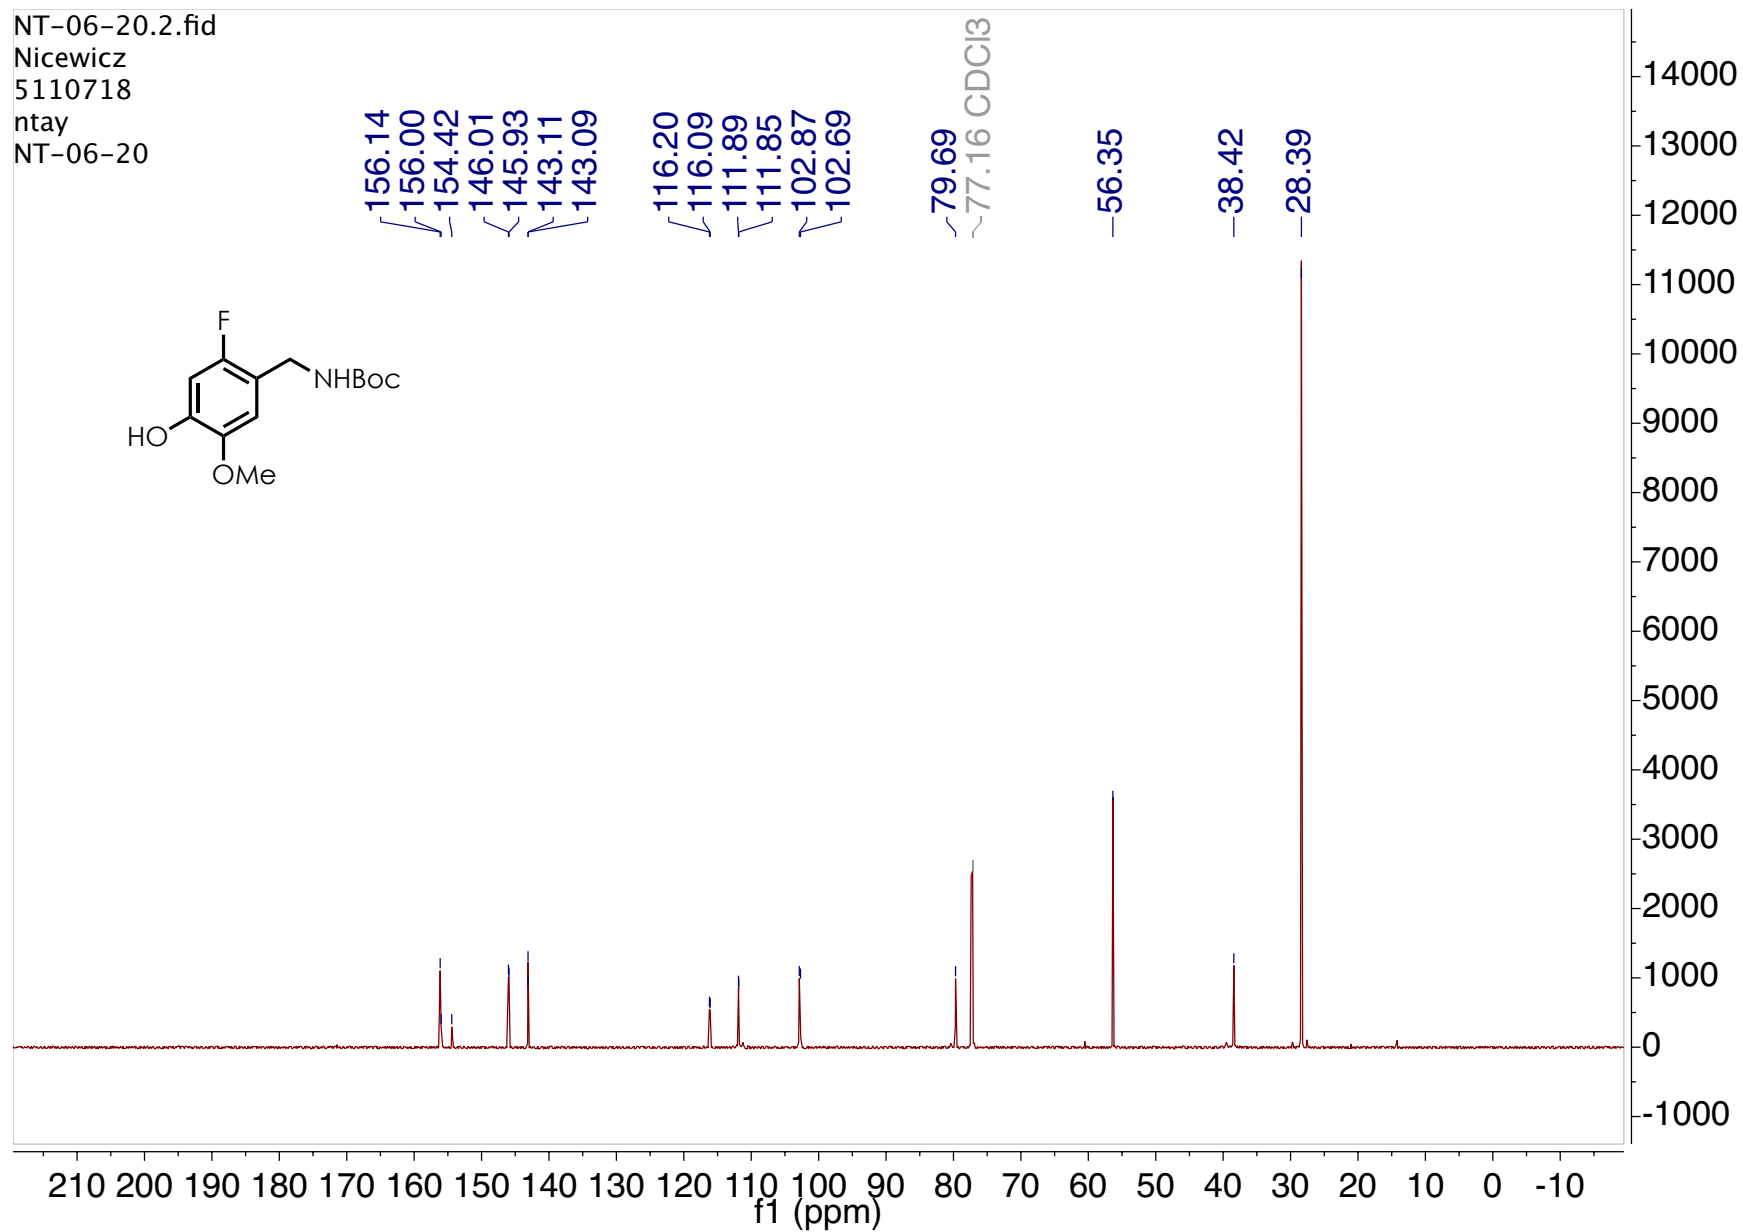

NT-06-20-19F.1.fid

F19 CDCl3 {C:\data\ntay} nmrsu 42

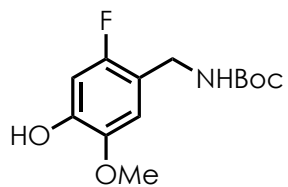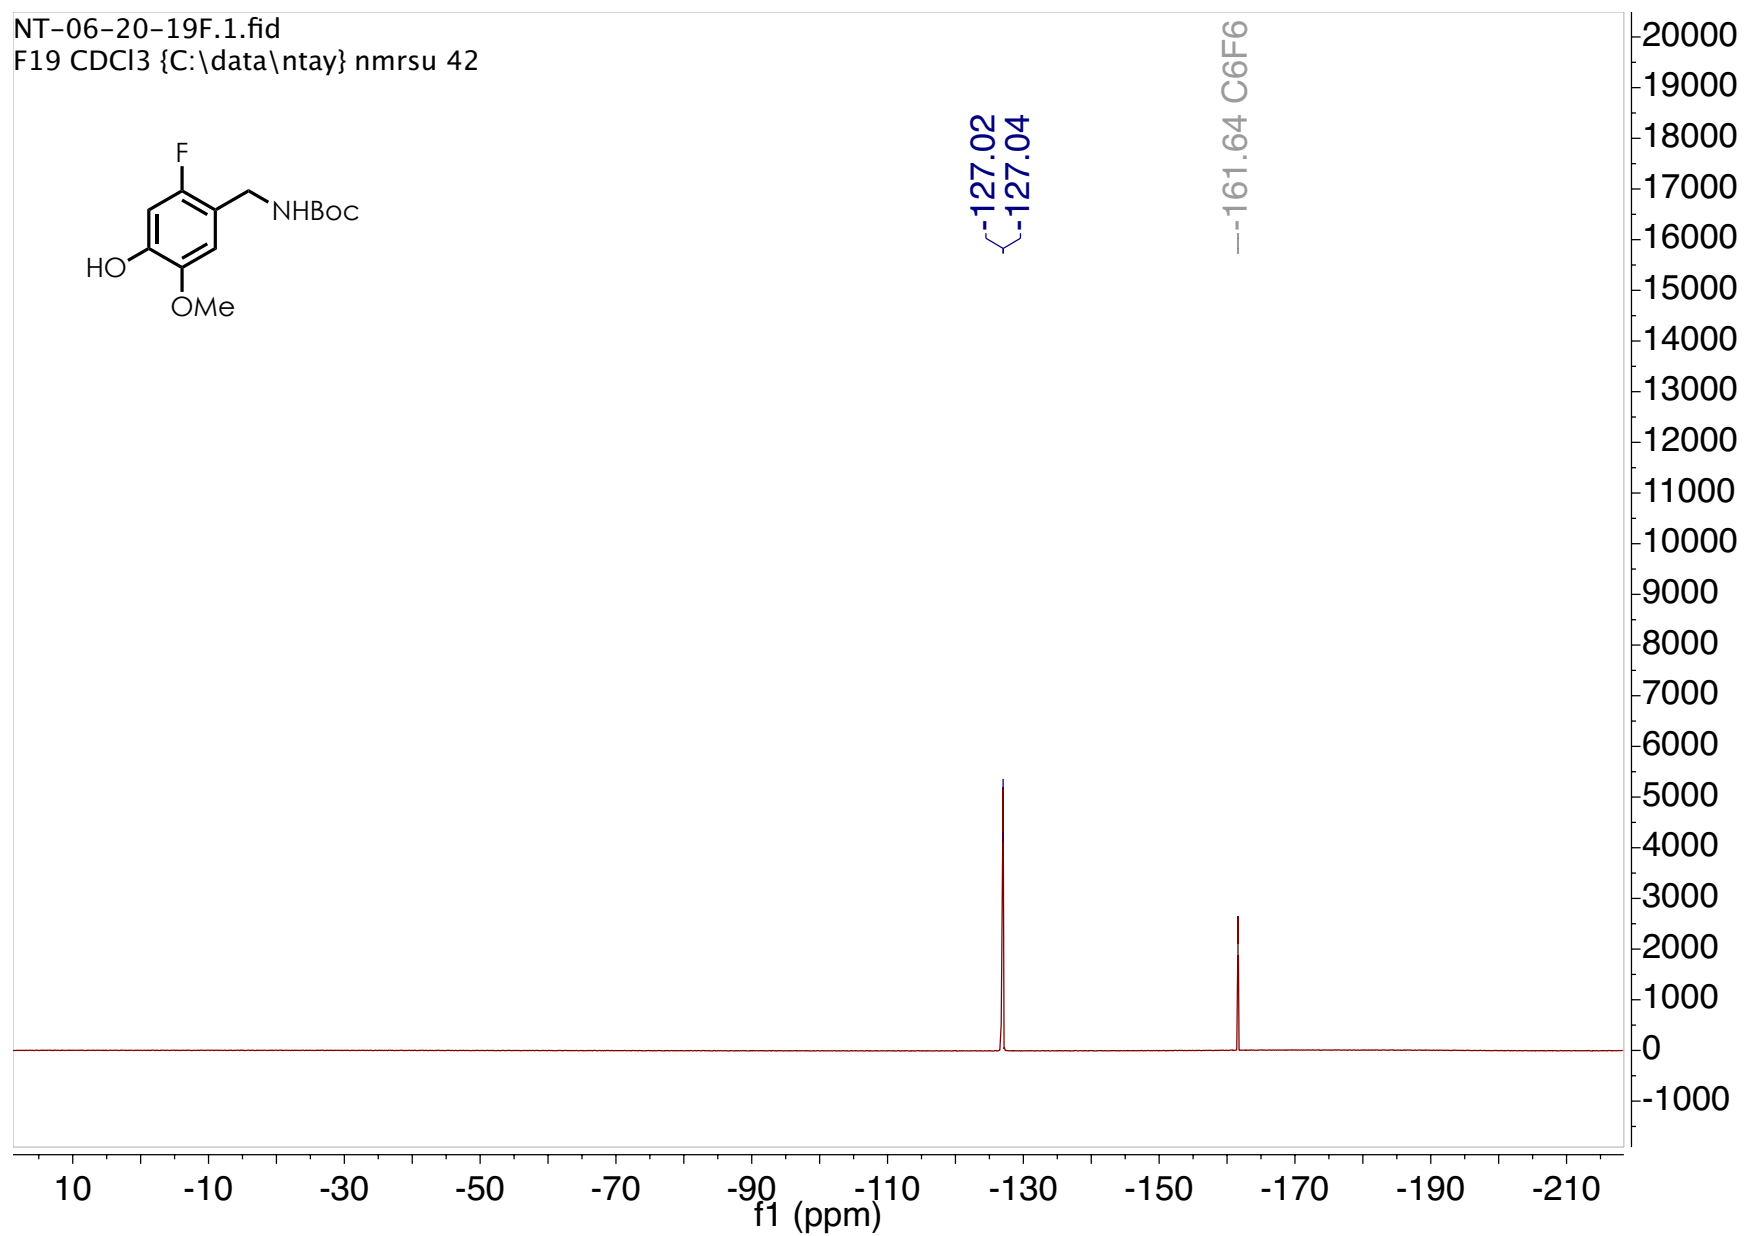

NT-06-22.1.fid  
Nicewicz  
5110718  
ntay  
NT-06-22

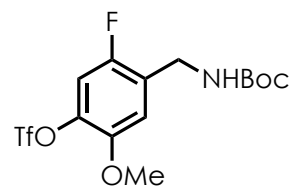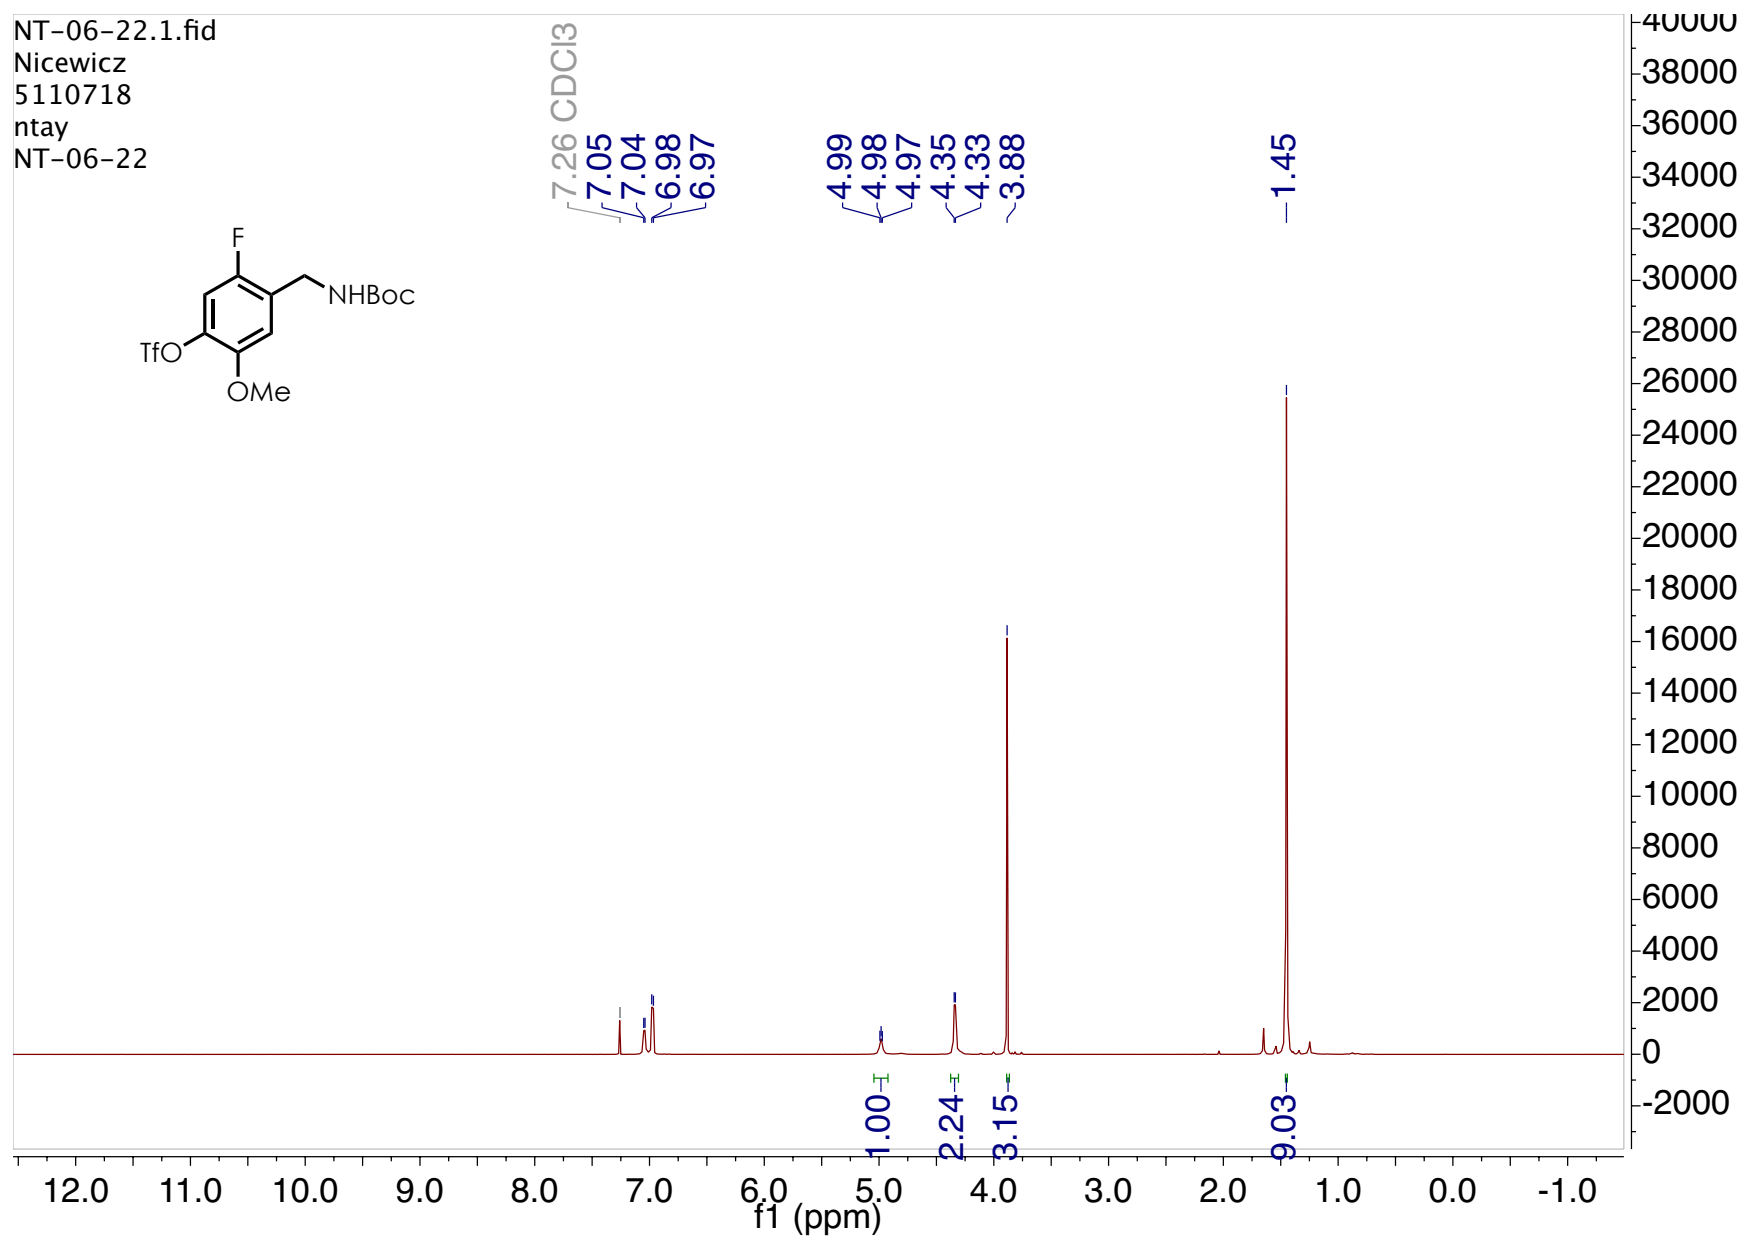

NT-06-22-13C.2.fid

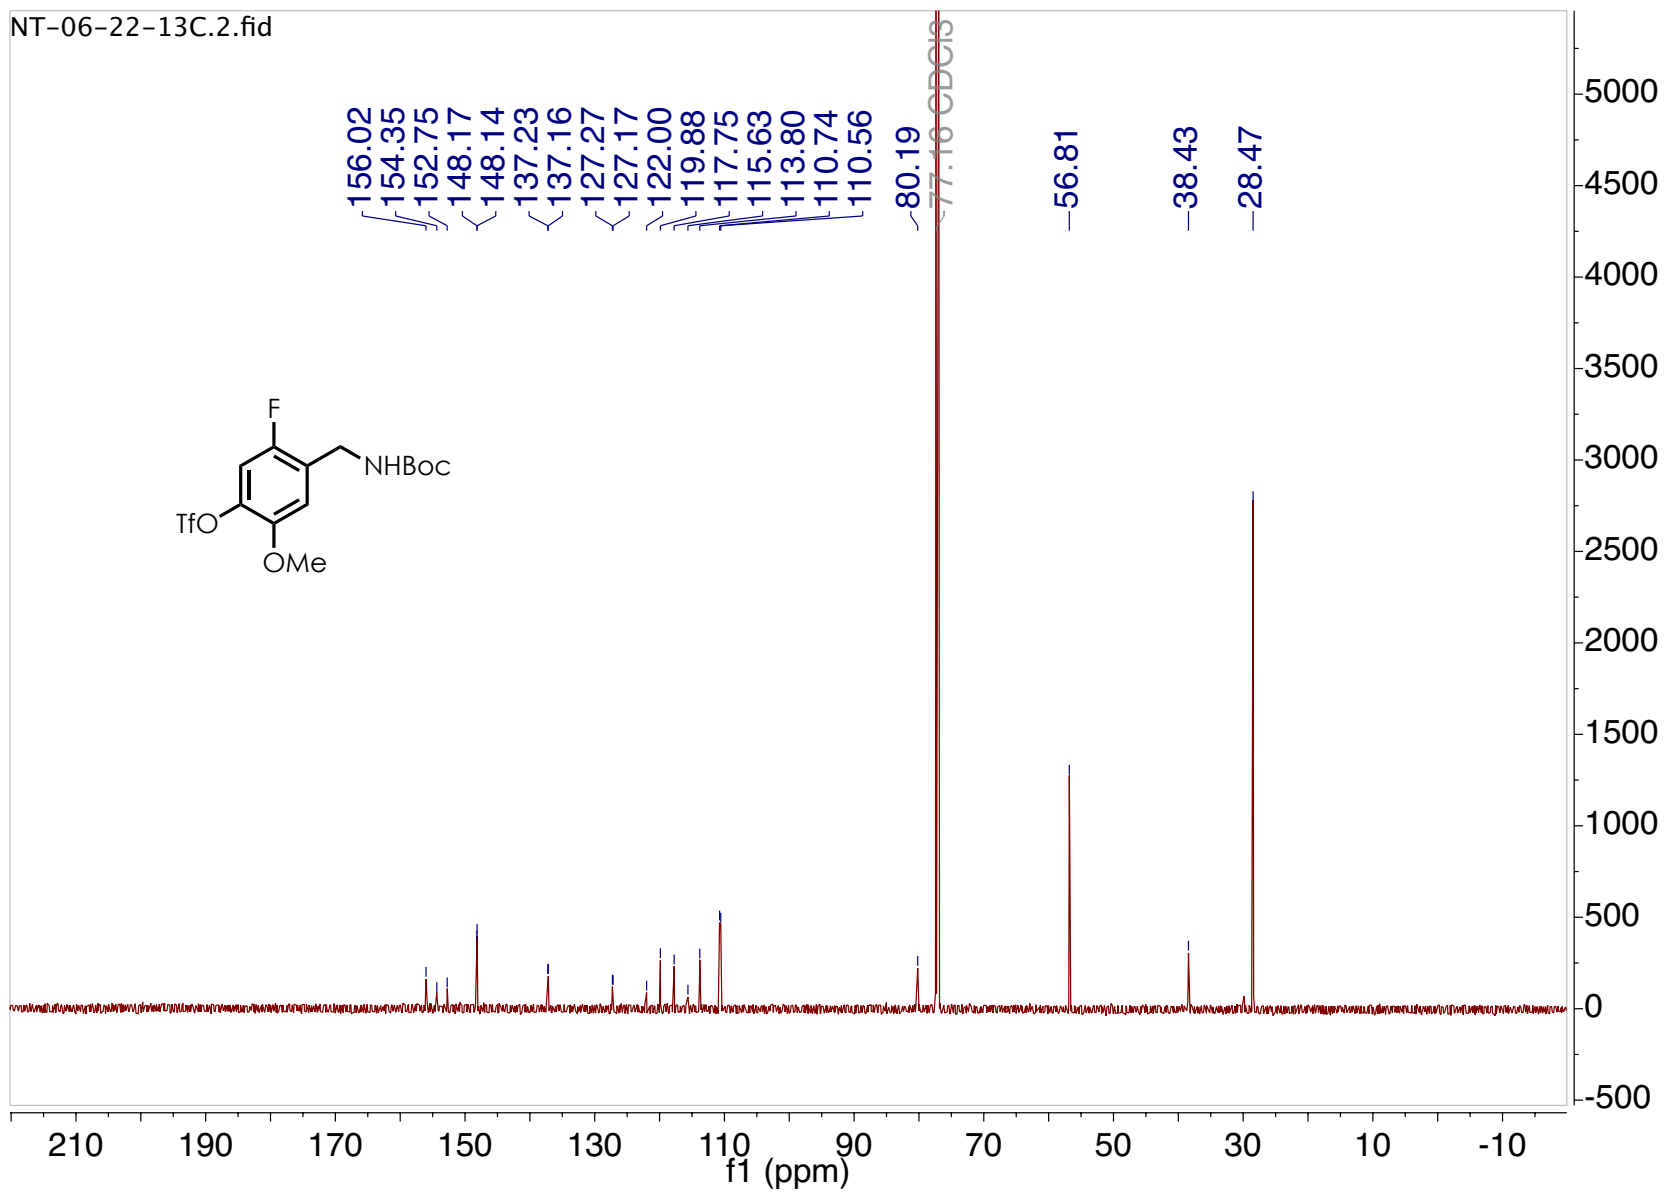

NT-06-22-19F.1.fid

F19 CDCl<sub>3</sub> {C:\data\ntay} nmrsu 50

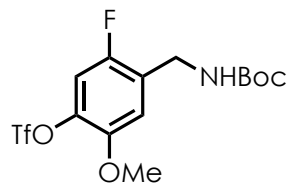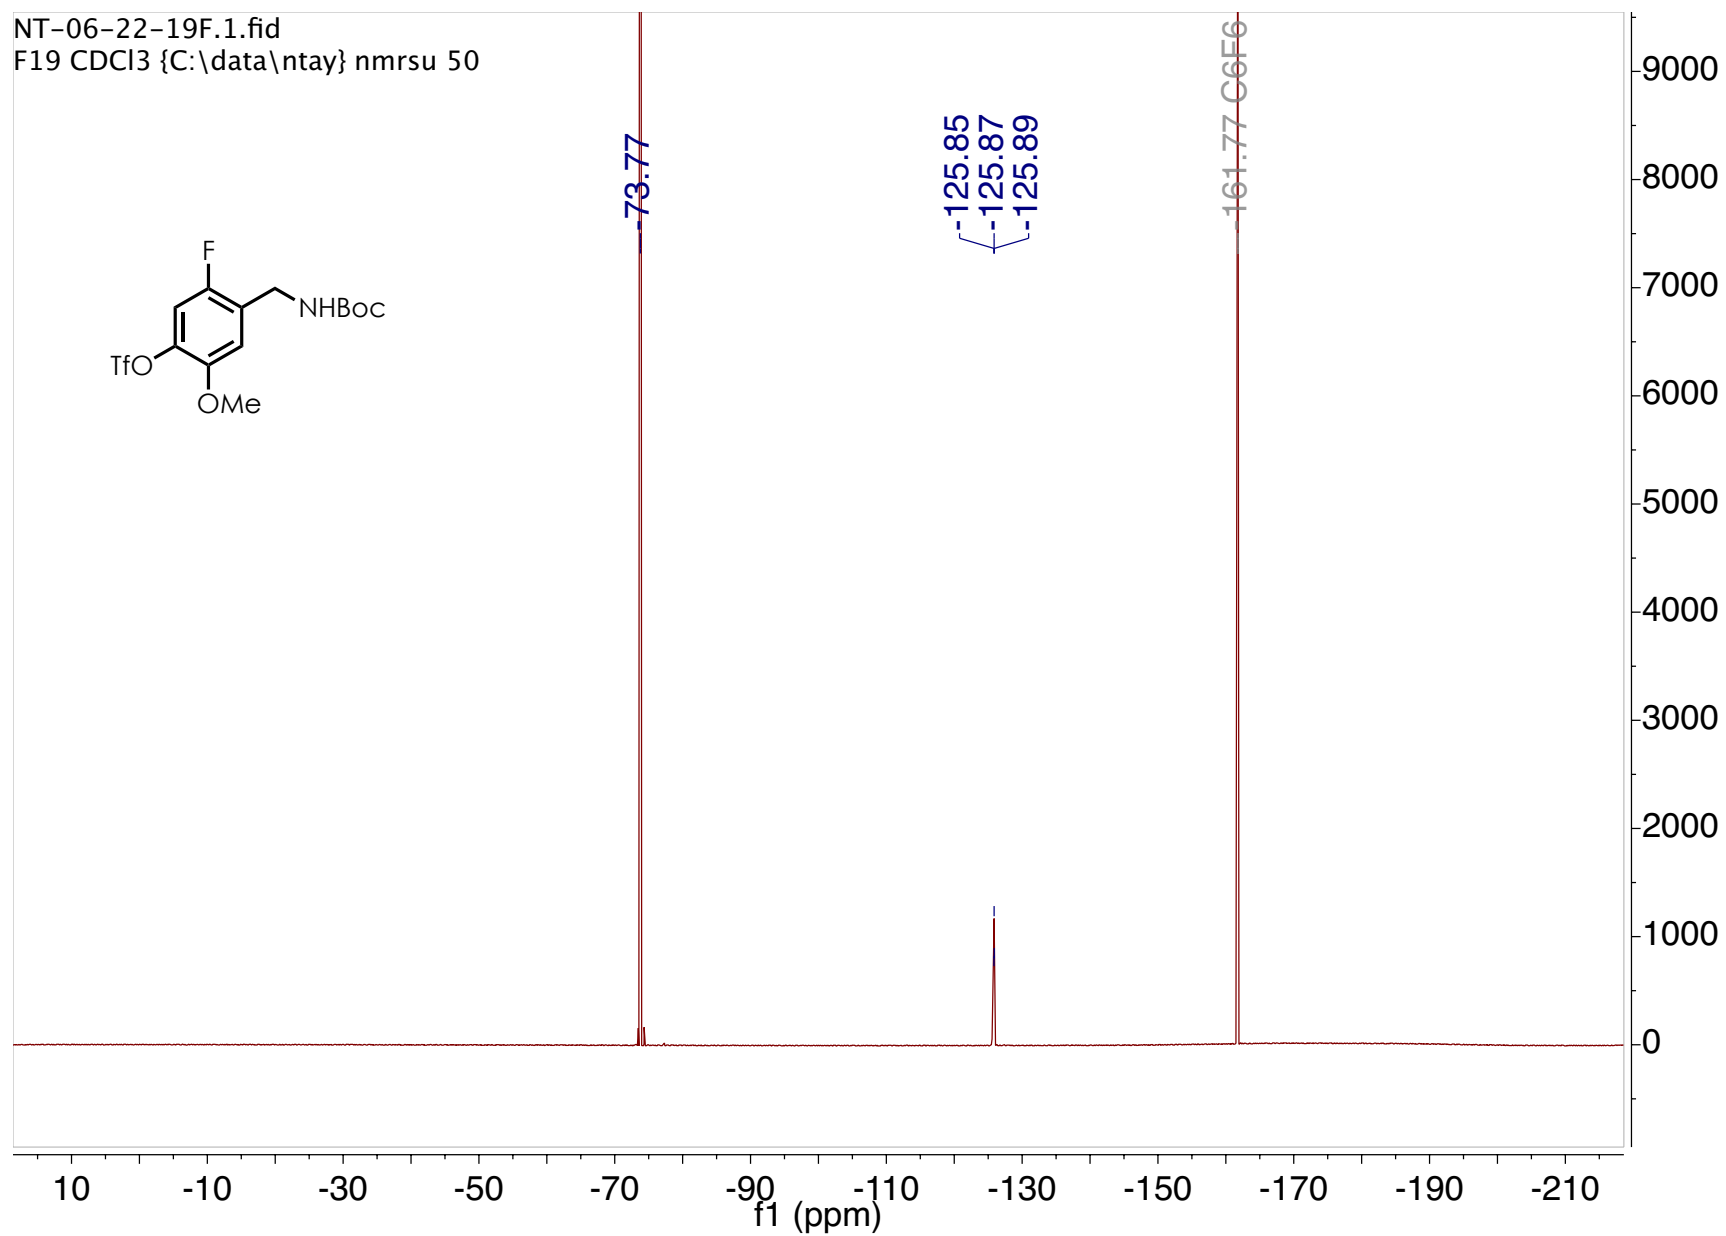

NT-06-37.1.fid  
 Nicewicz  
 5110718  
 nta  
 NT-06-37

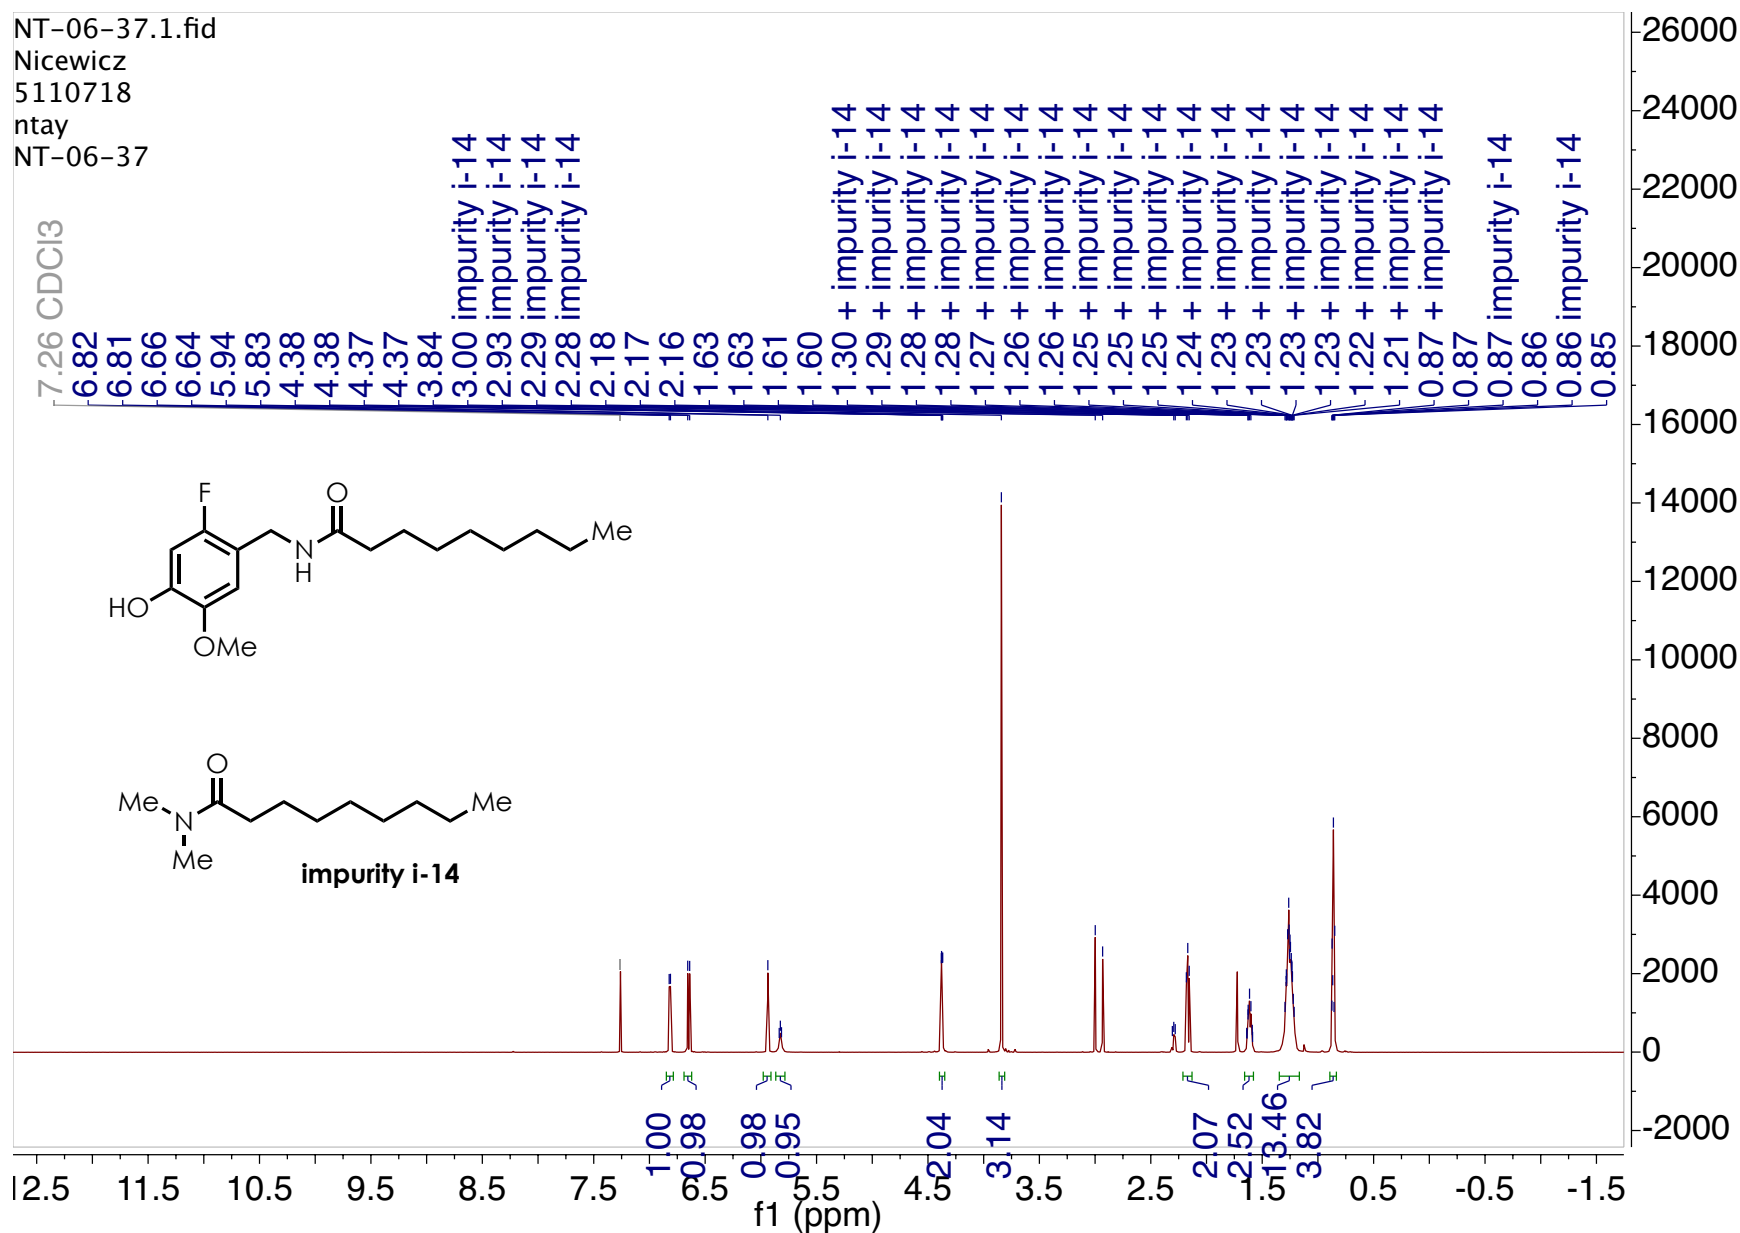

NT-06-37 2.2.fid  
 Nicewicz  
 5110718  
 ntay  
 NT-06-37

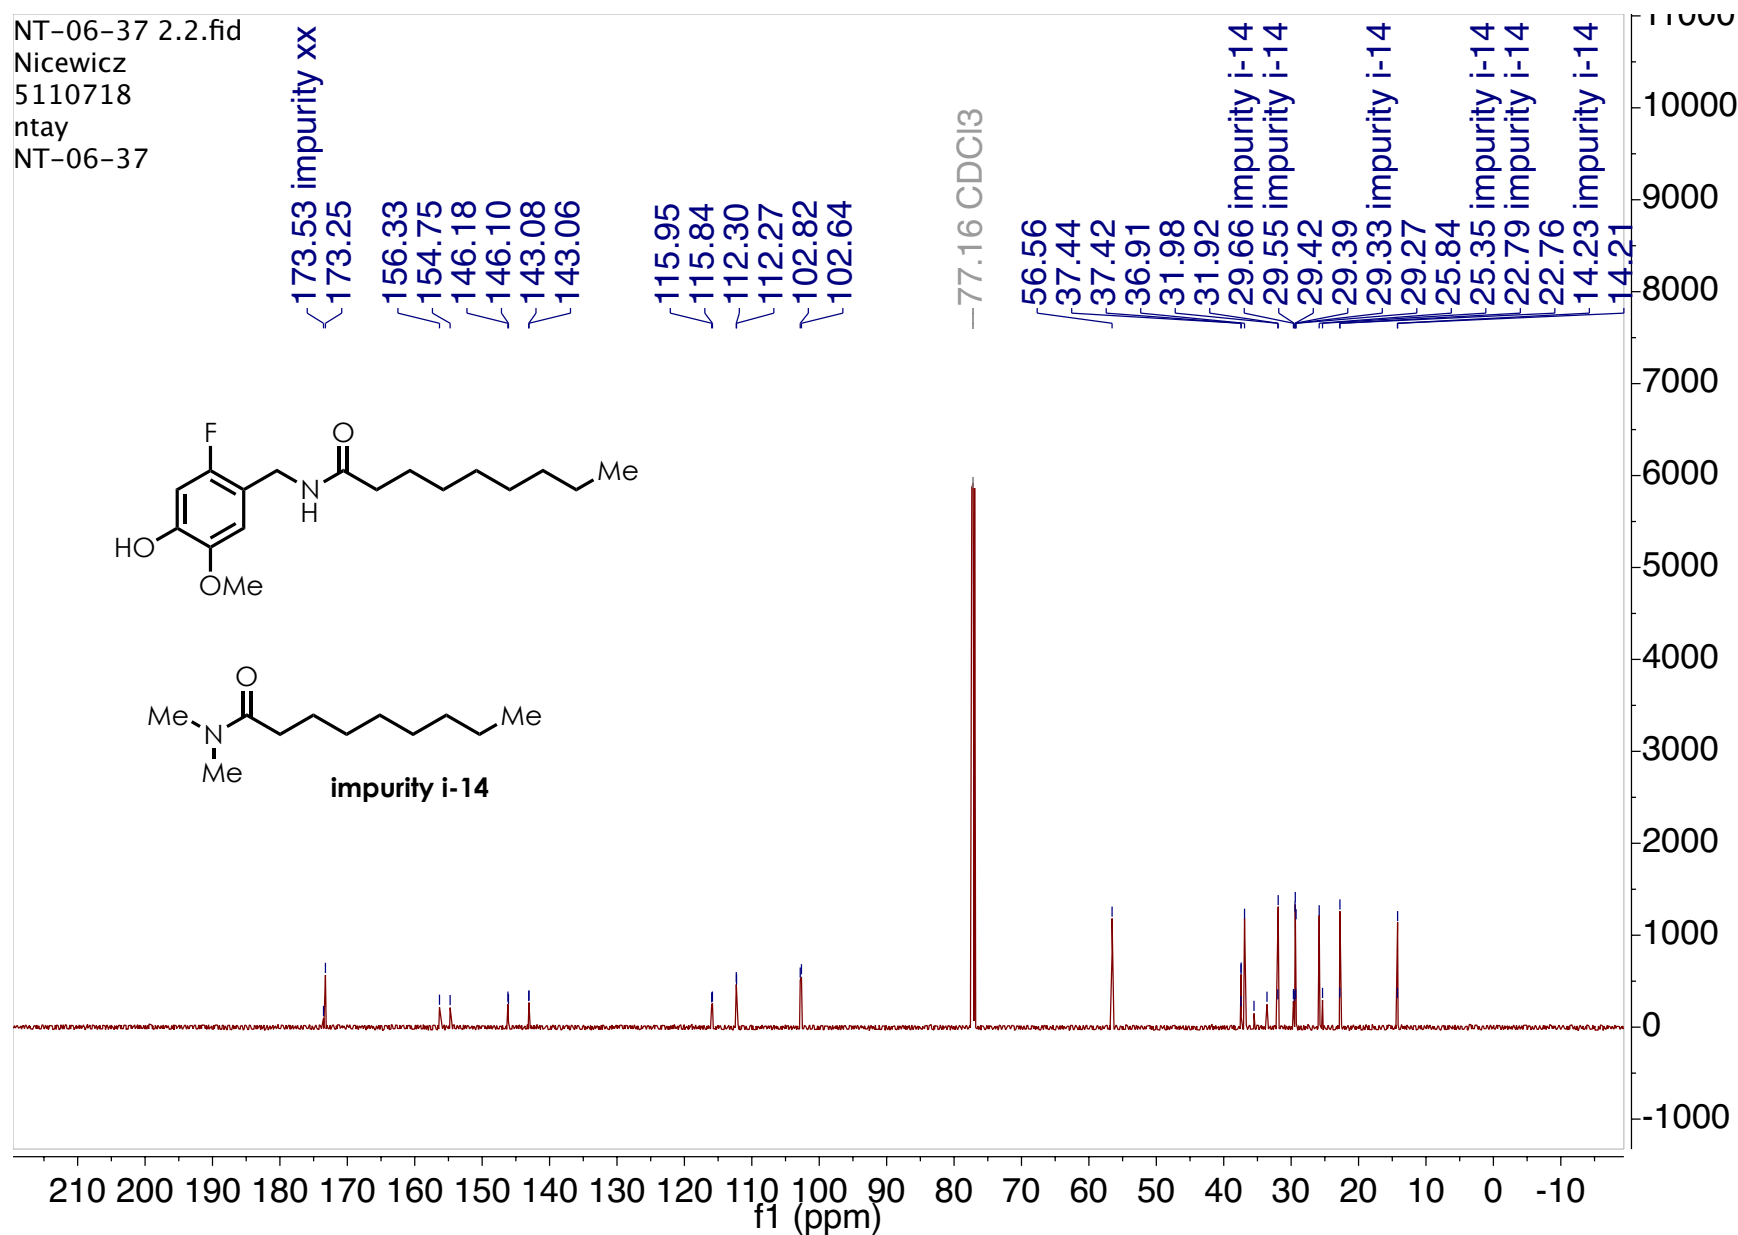

NT-06-37-19F.1.fid

F19 CDCl3 {C:\data\ntay} nmrsu 11

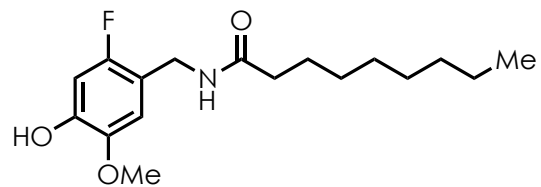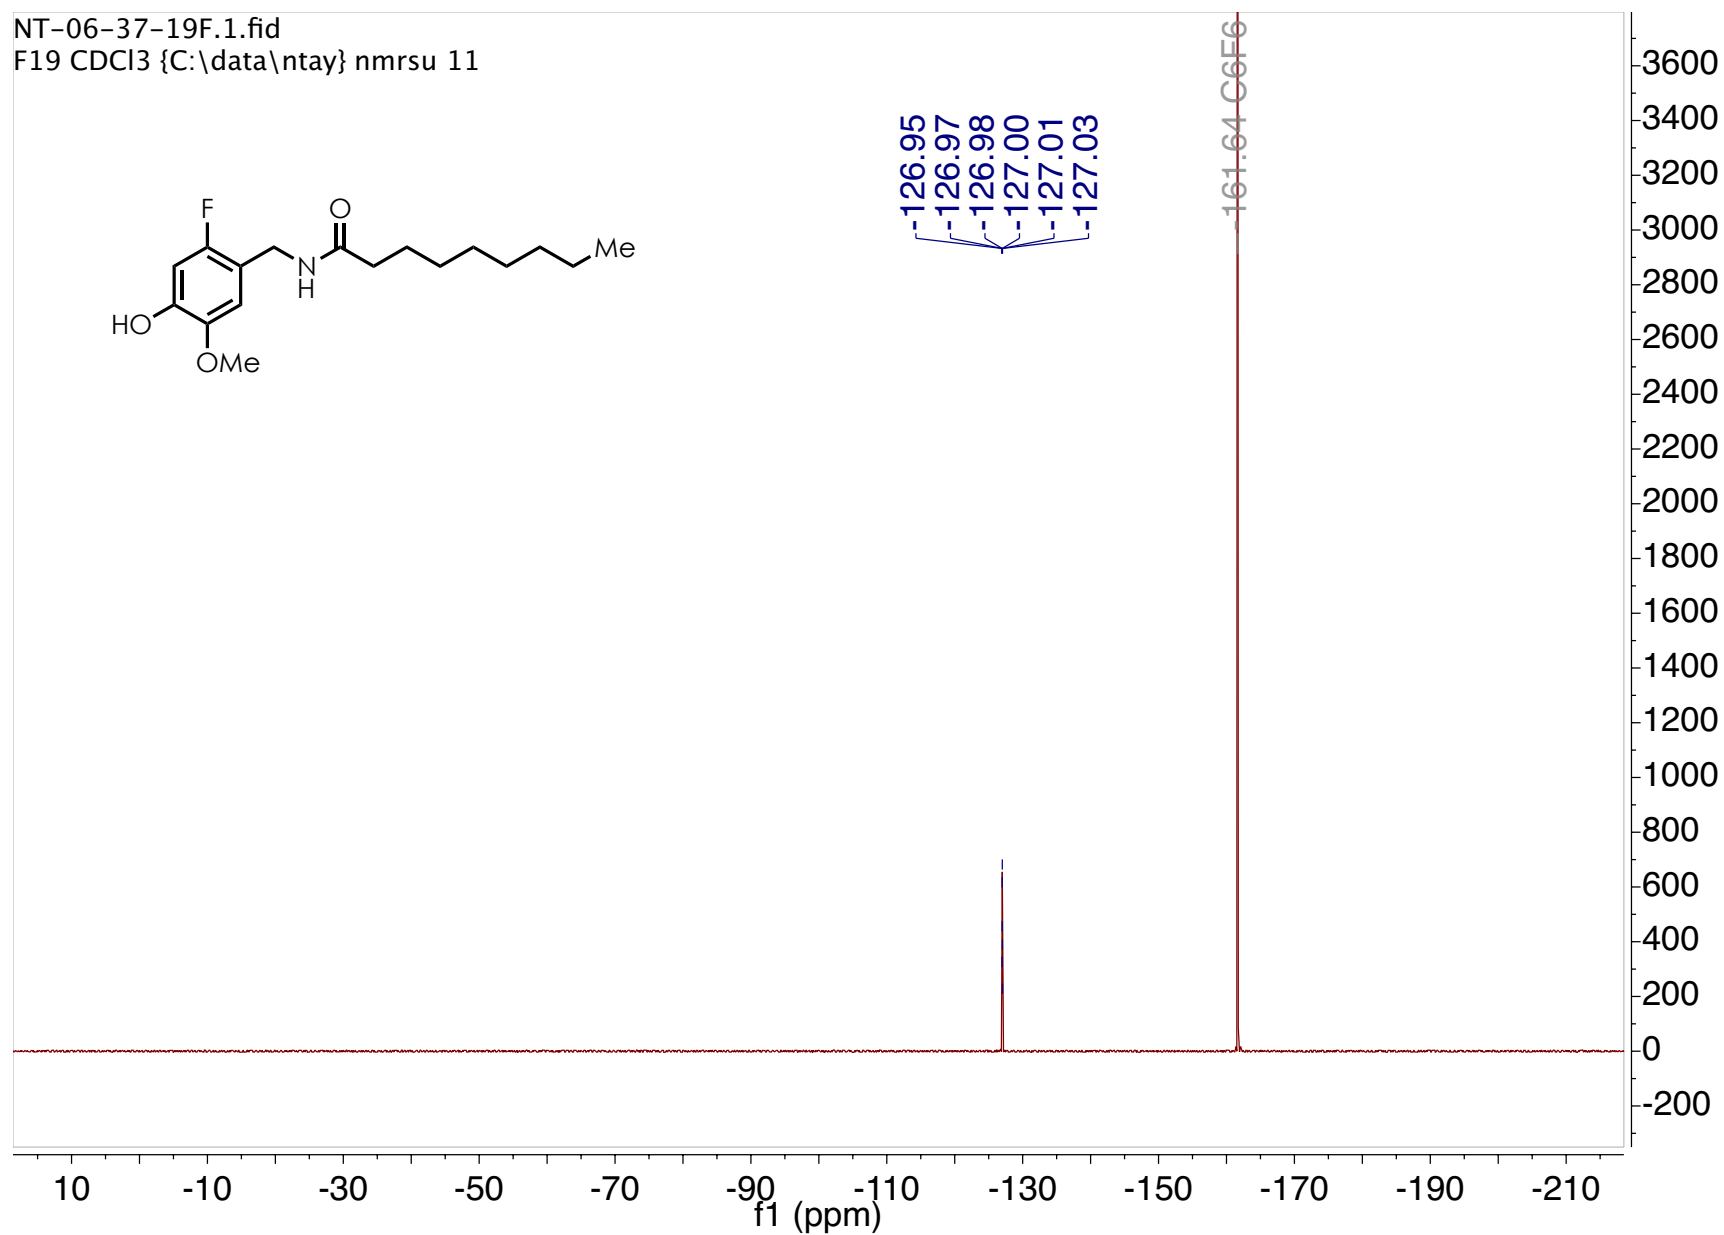

NT-06-41-1H.1.fid

NT-06-41-1H

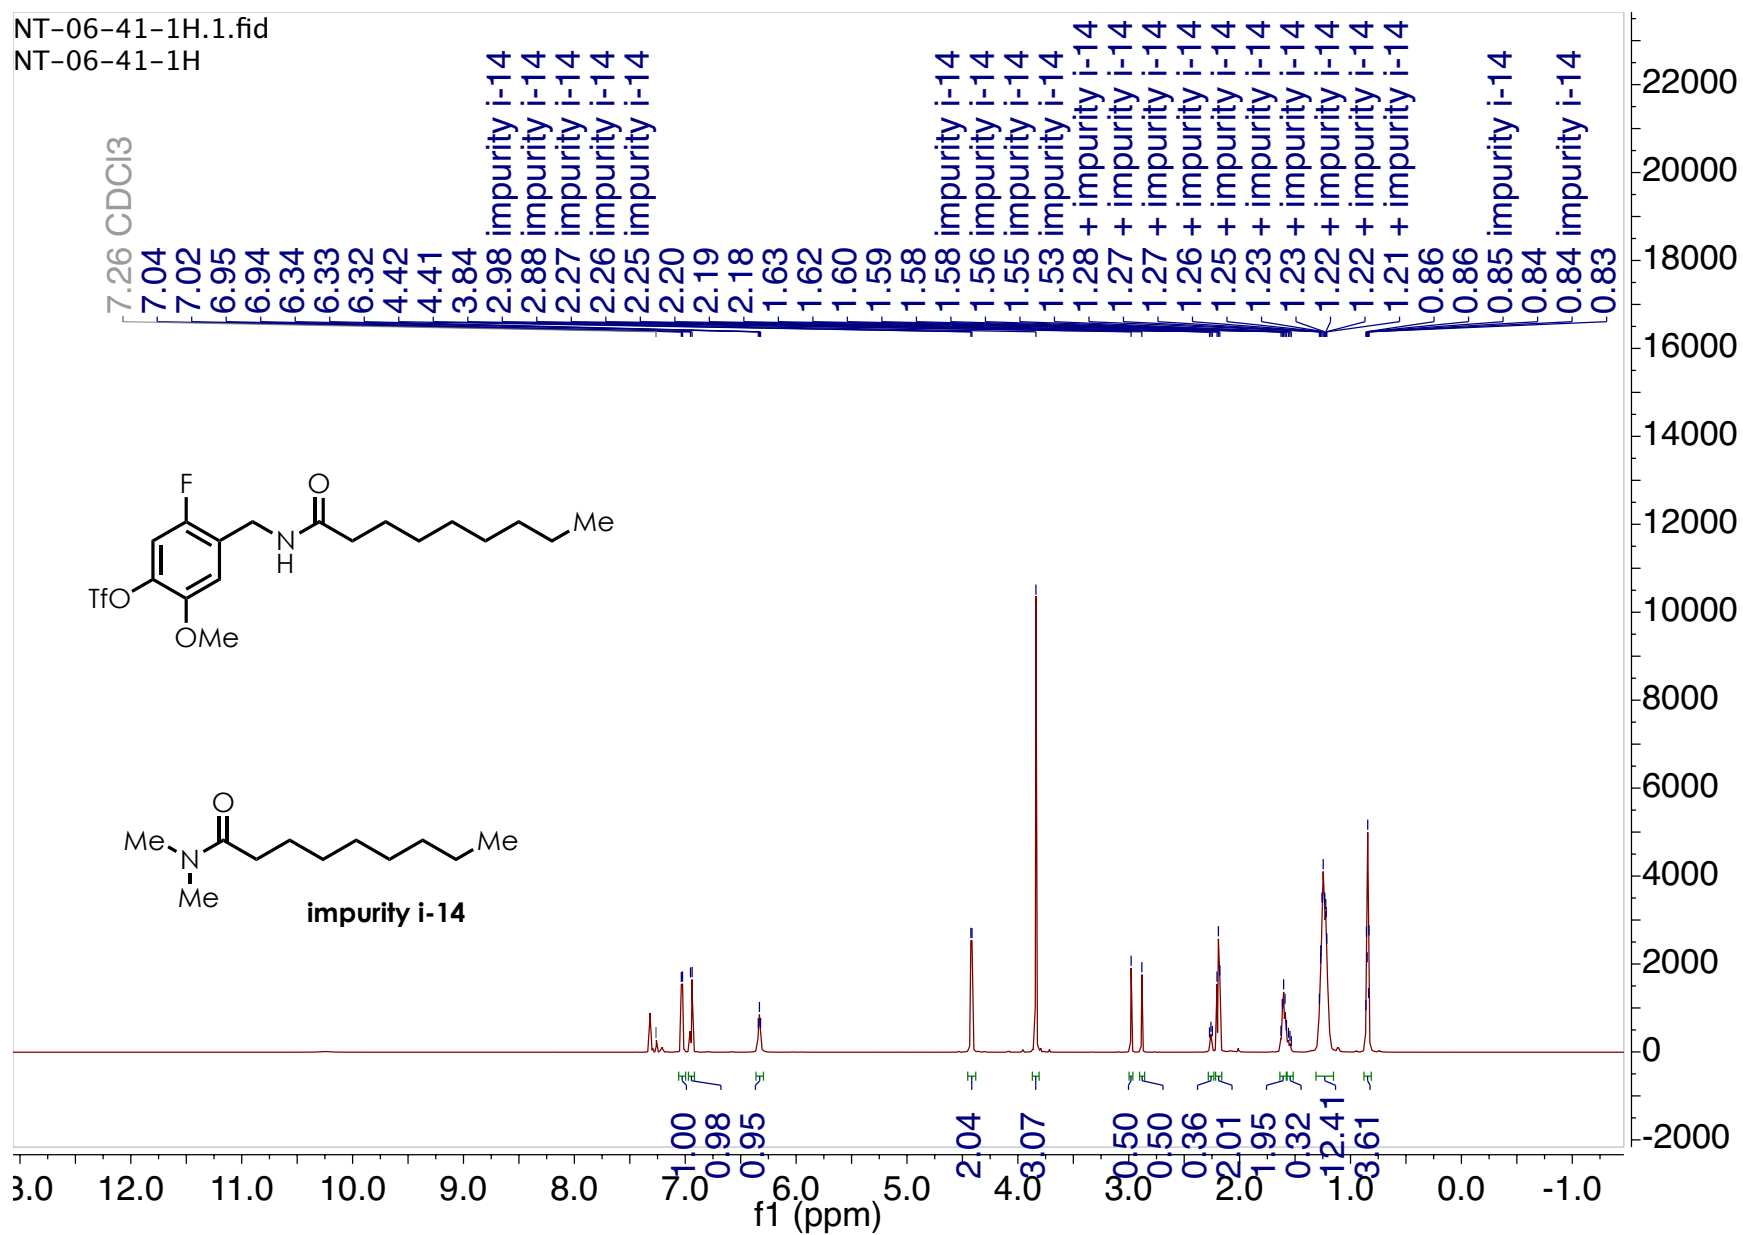

NT-06-41.1.fid  
Nicewicz  
5110718  
ntay  
NT-06-41

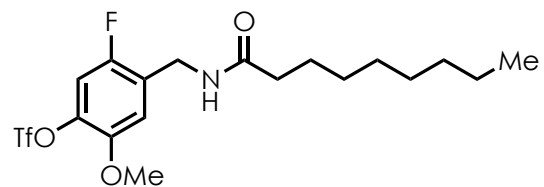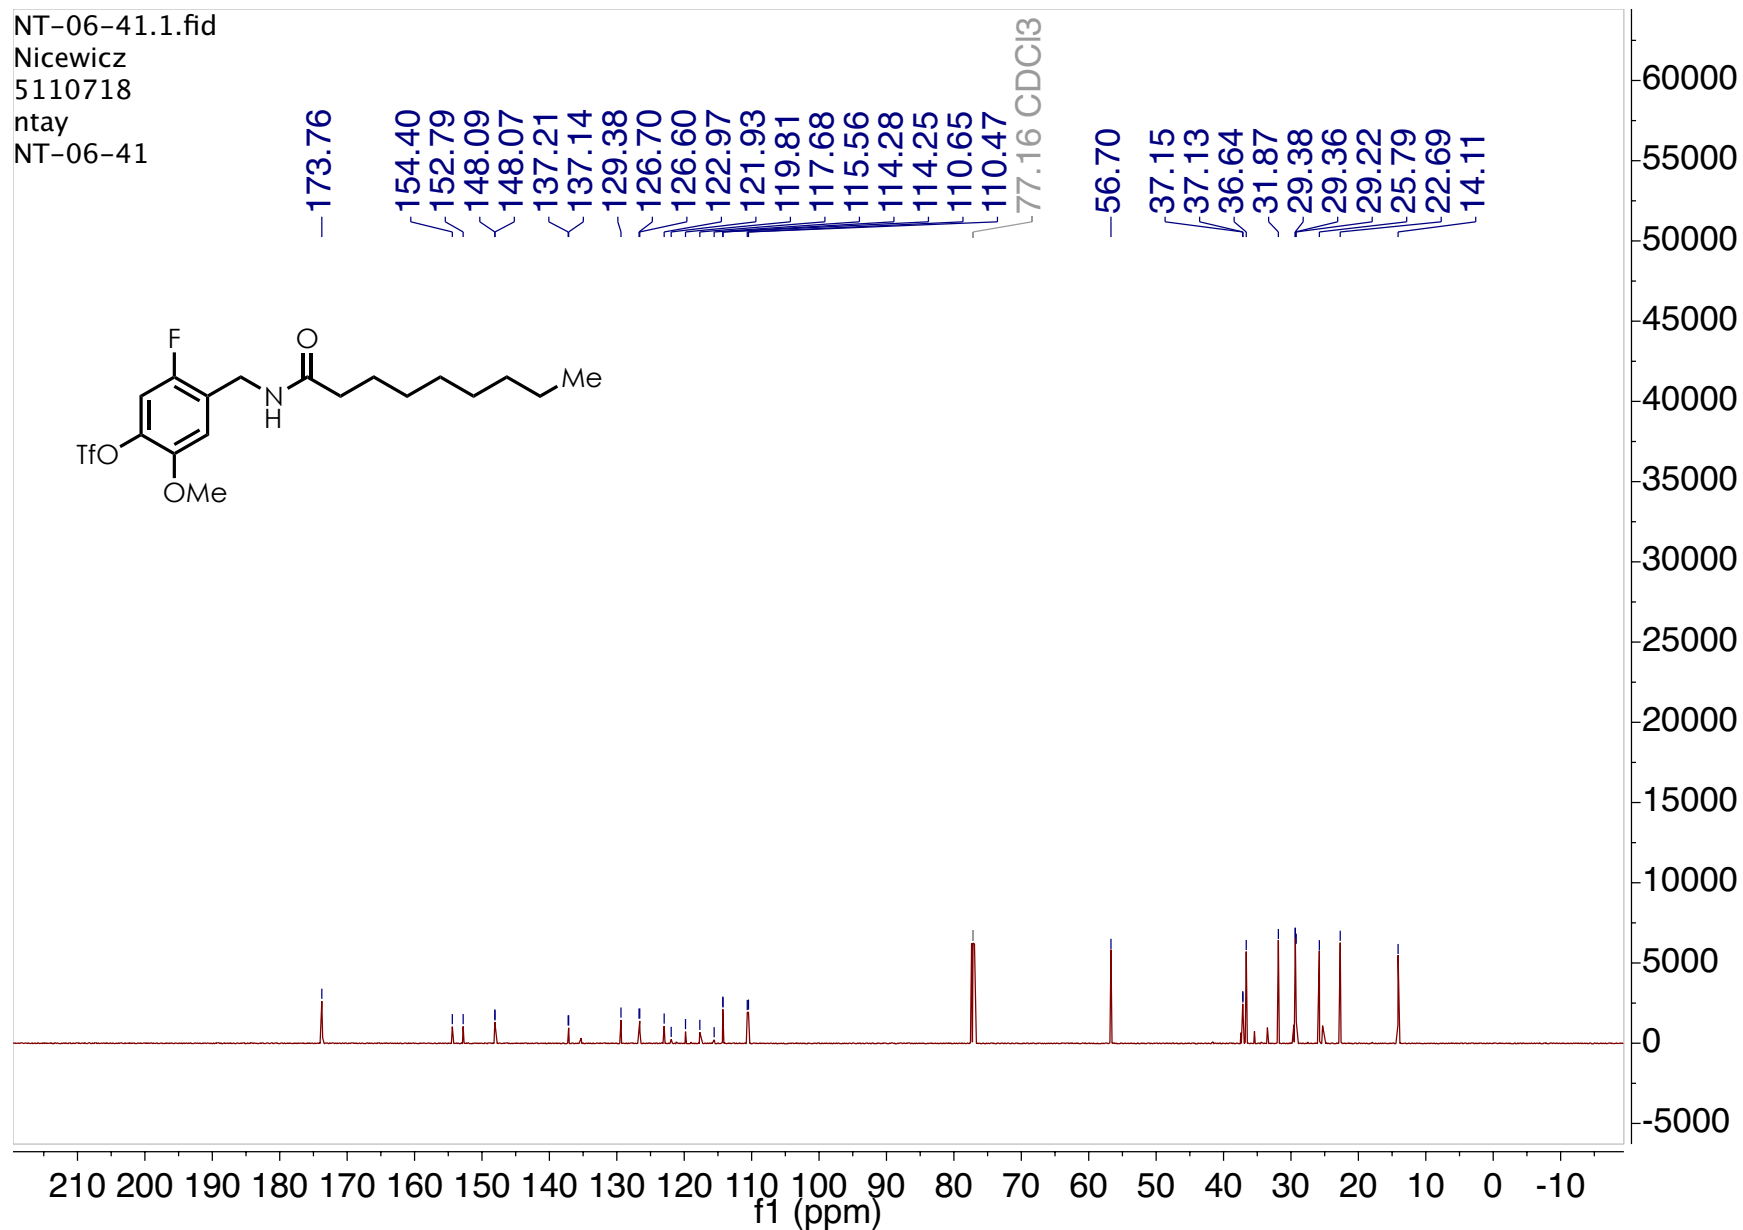

NT-06-41-19F.3.fid

F19 CDCl<sub>3</sub> {C:\data\ntay} nmrsu 32

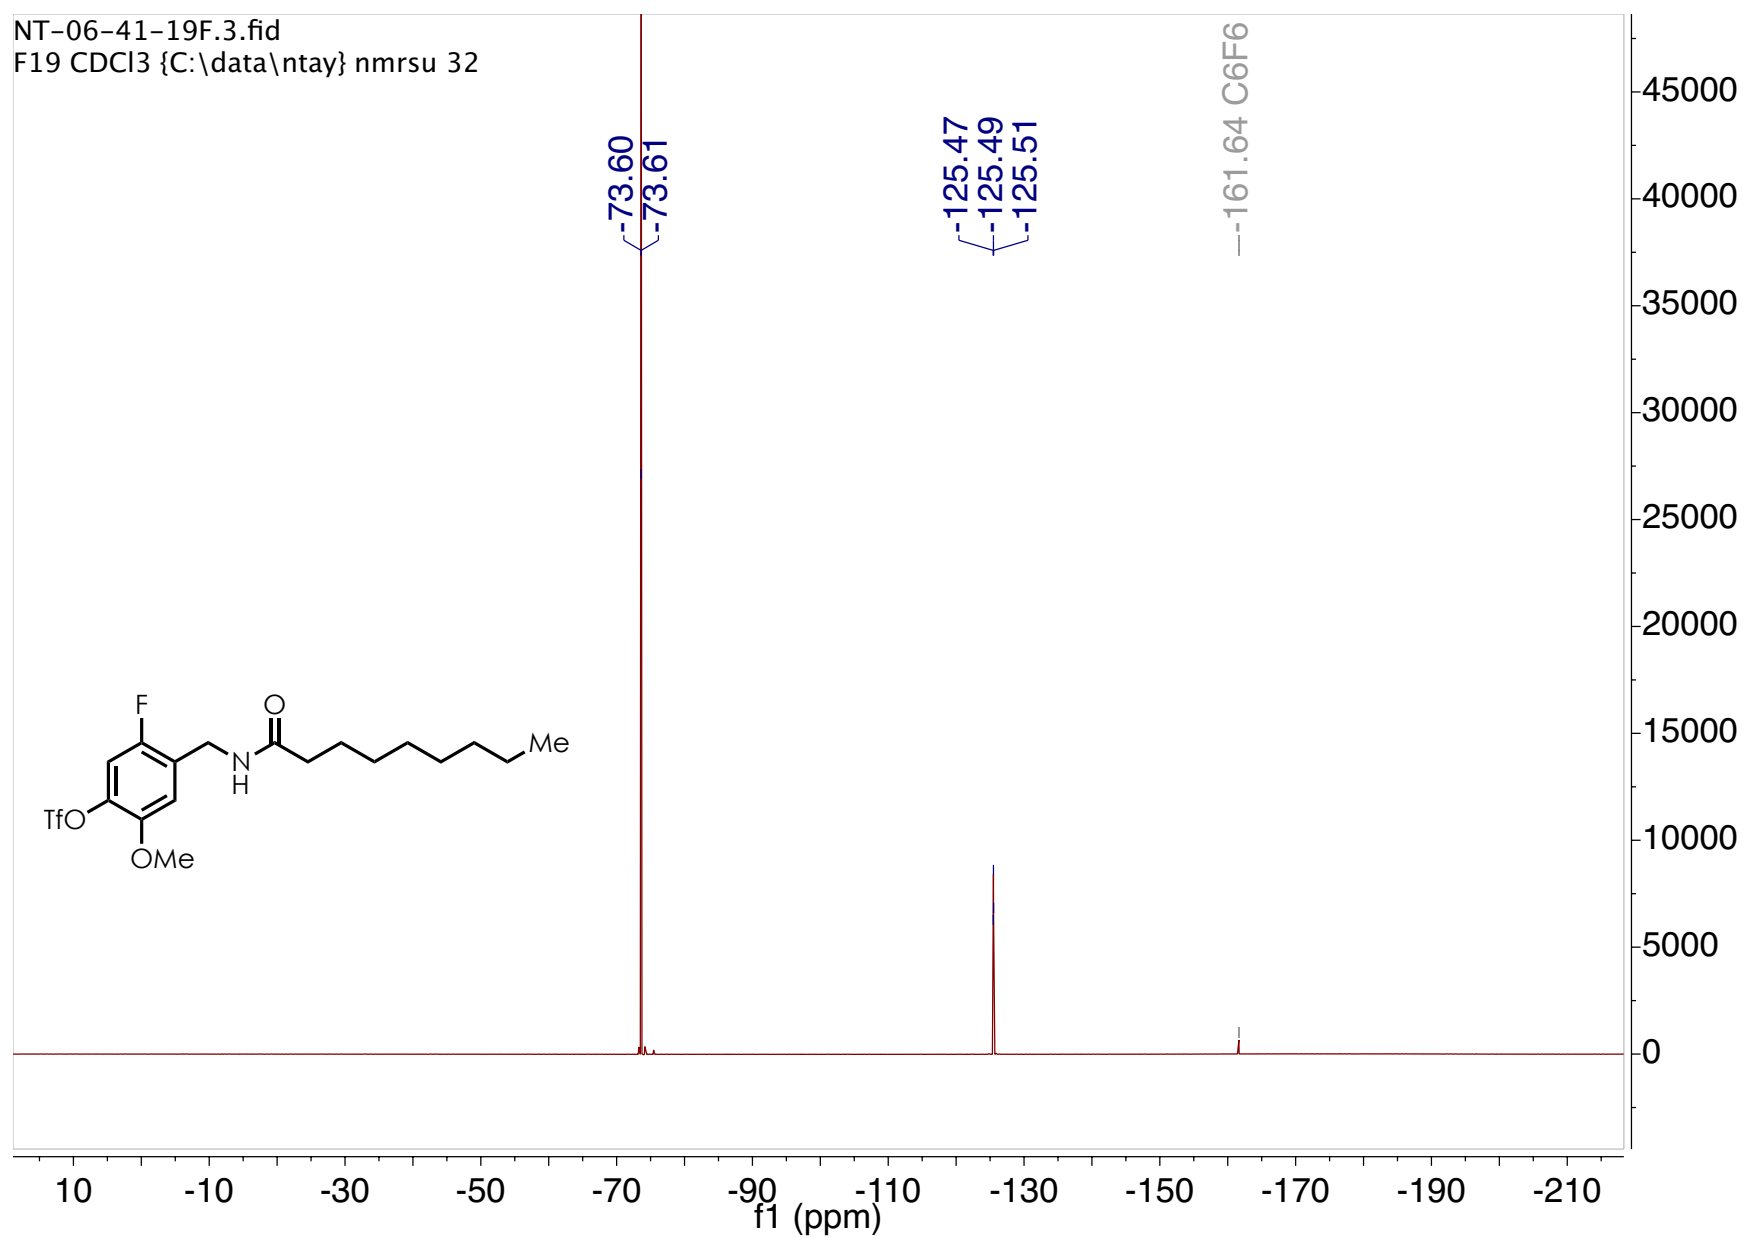

NT-06-189 1.1.fid  
Nicewicz  
5106082  
ntay  
NT-06-189

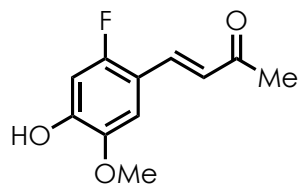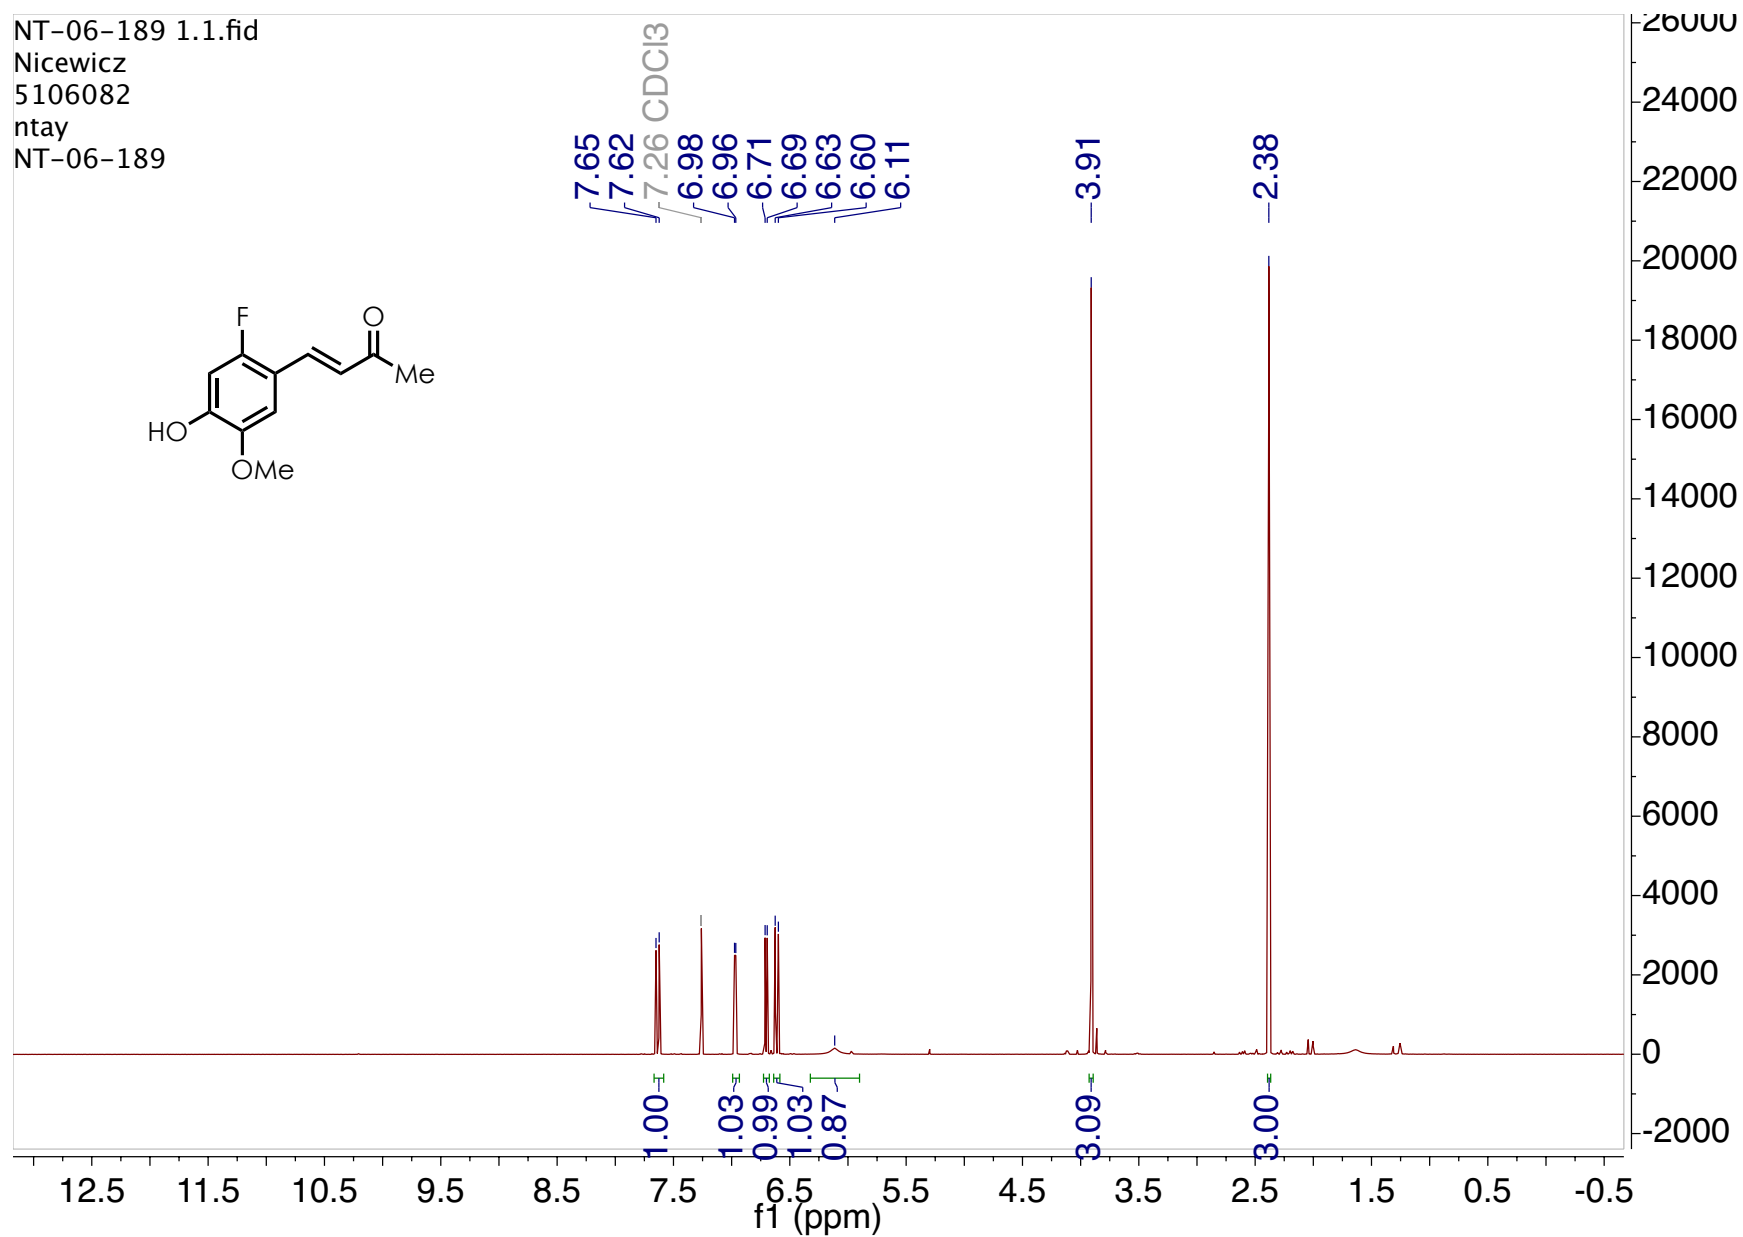

NT-06-189 2.2.fid

Nicewicz

5106082

ntay

NT-06-189

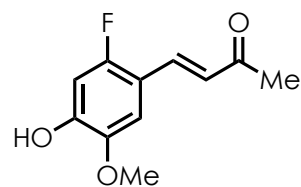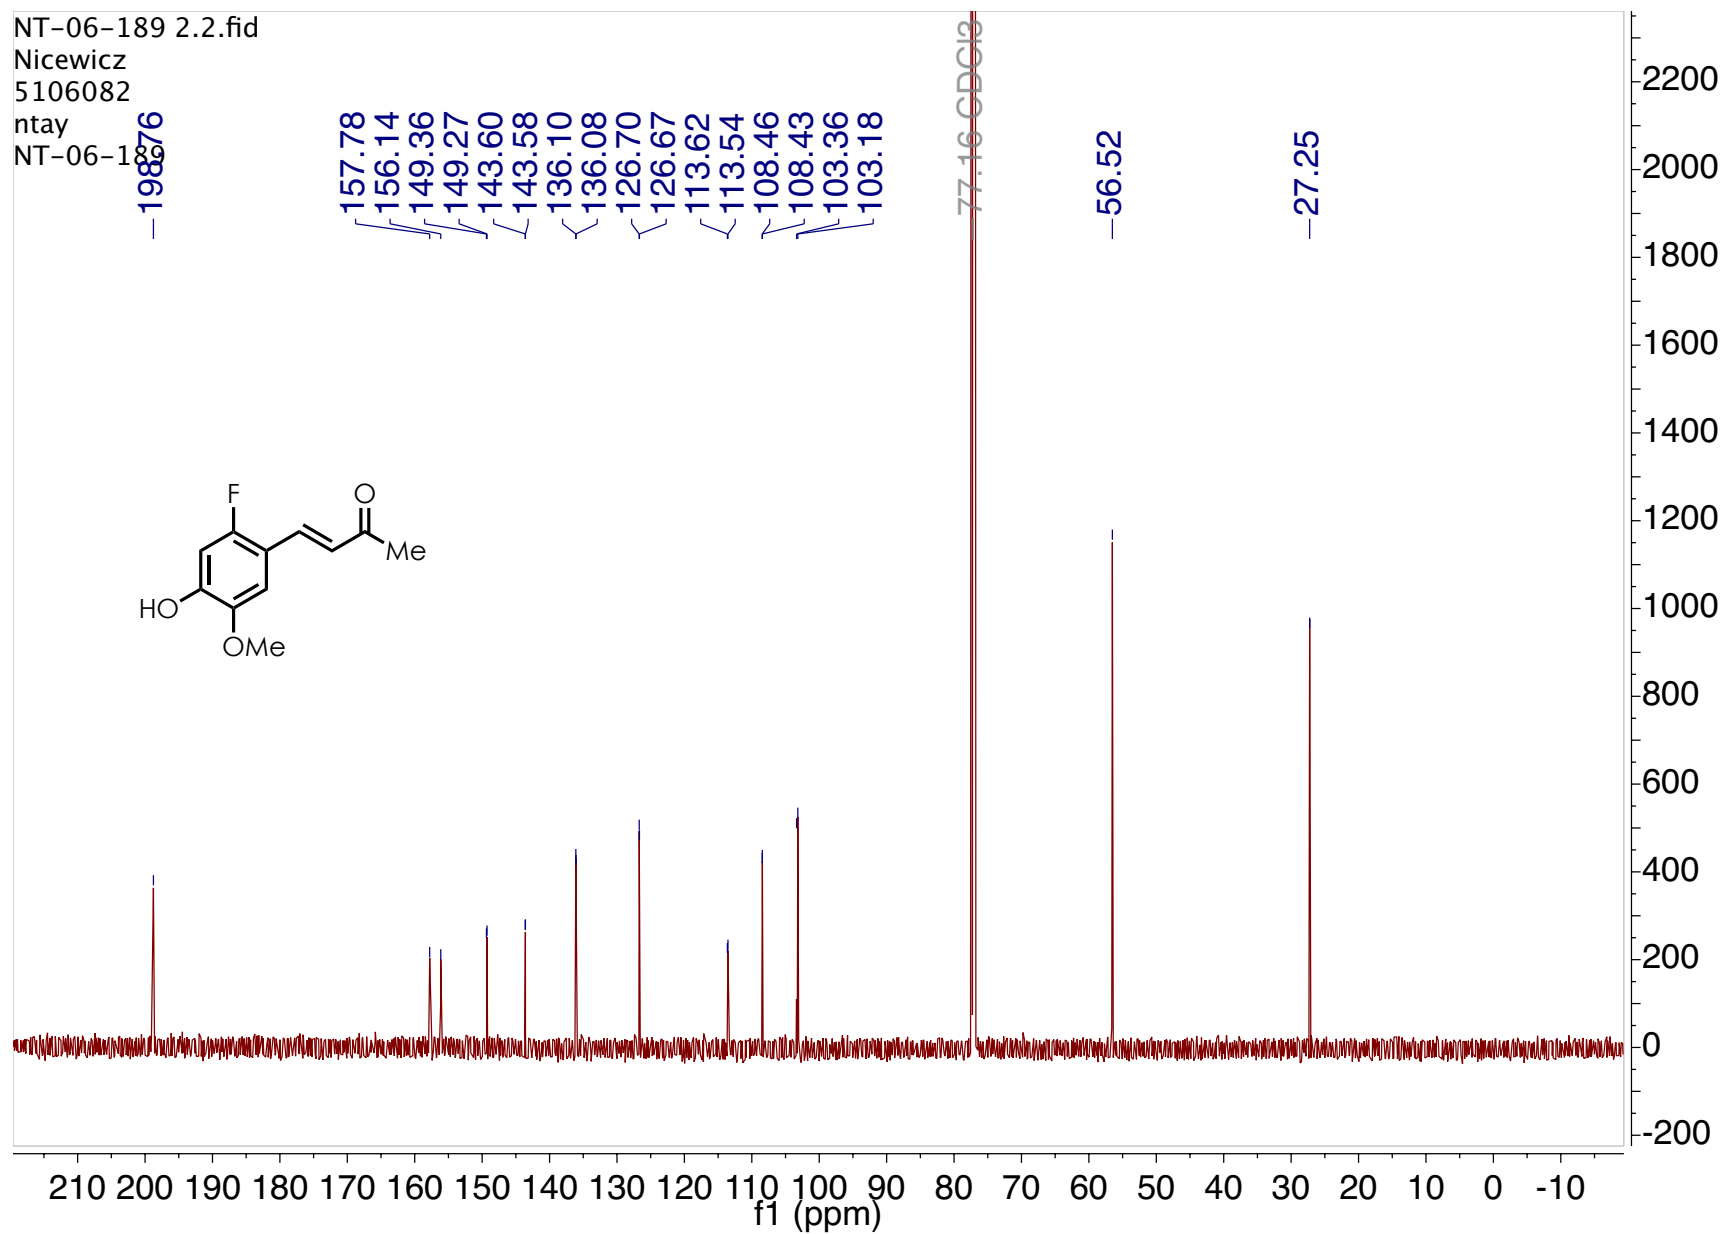

NT-06-189-19F.4.fid  
NT-06-189-19F

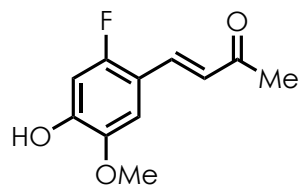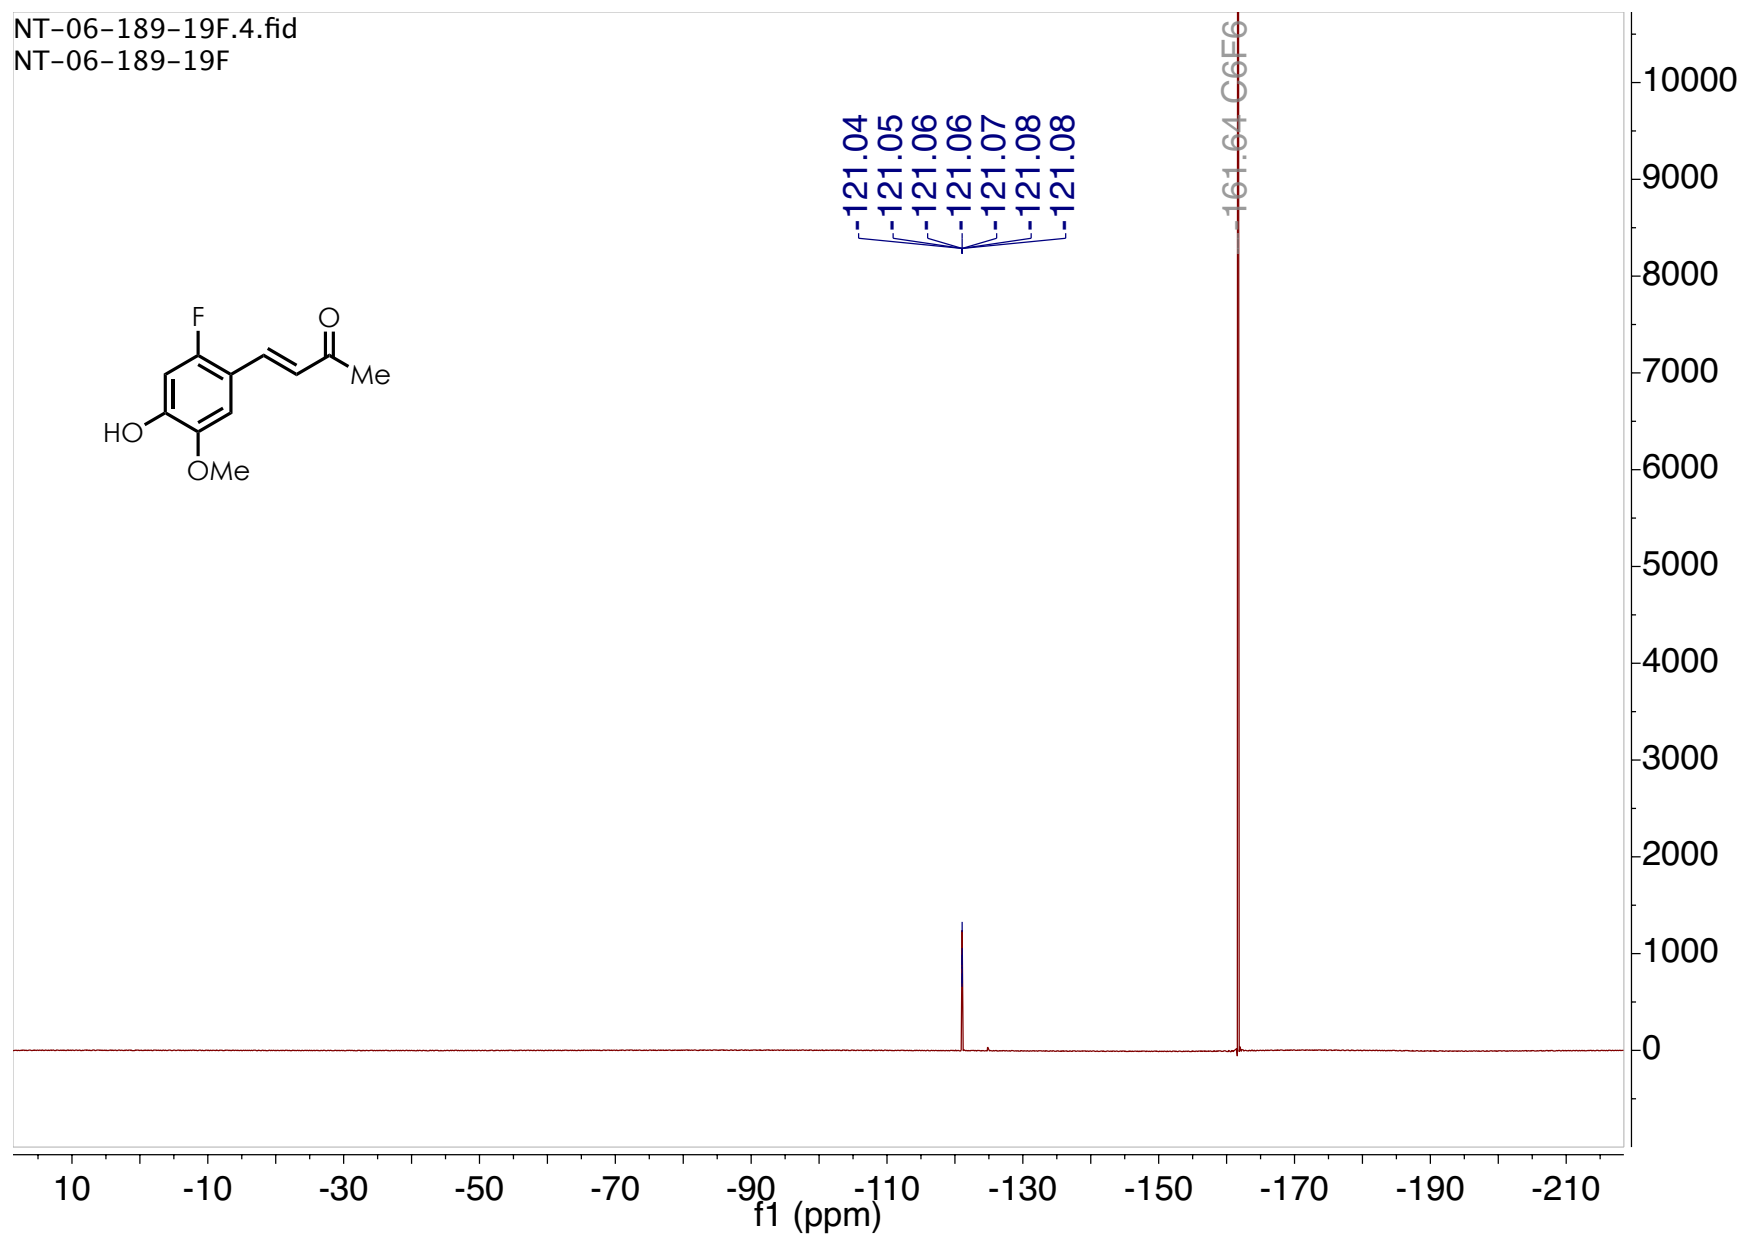

NT-06-195.1.fid

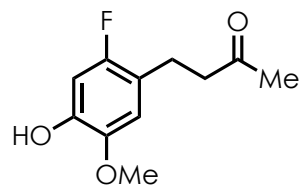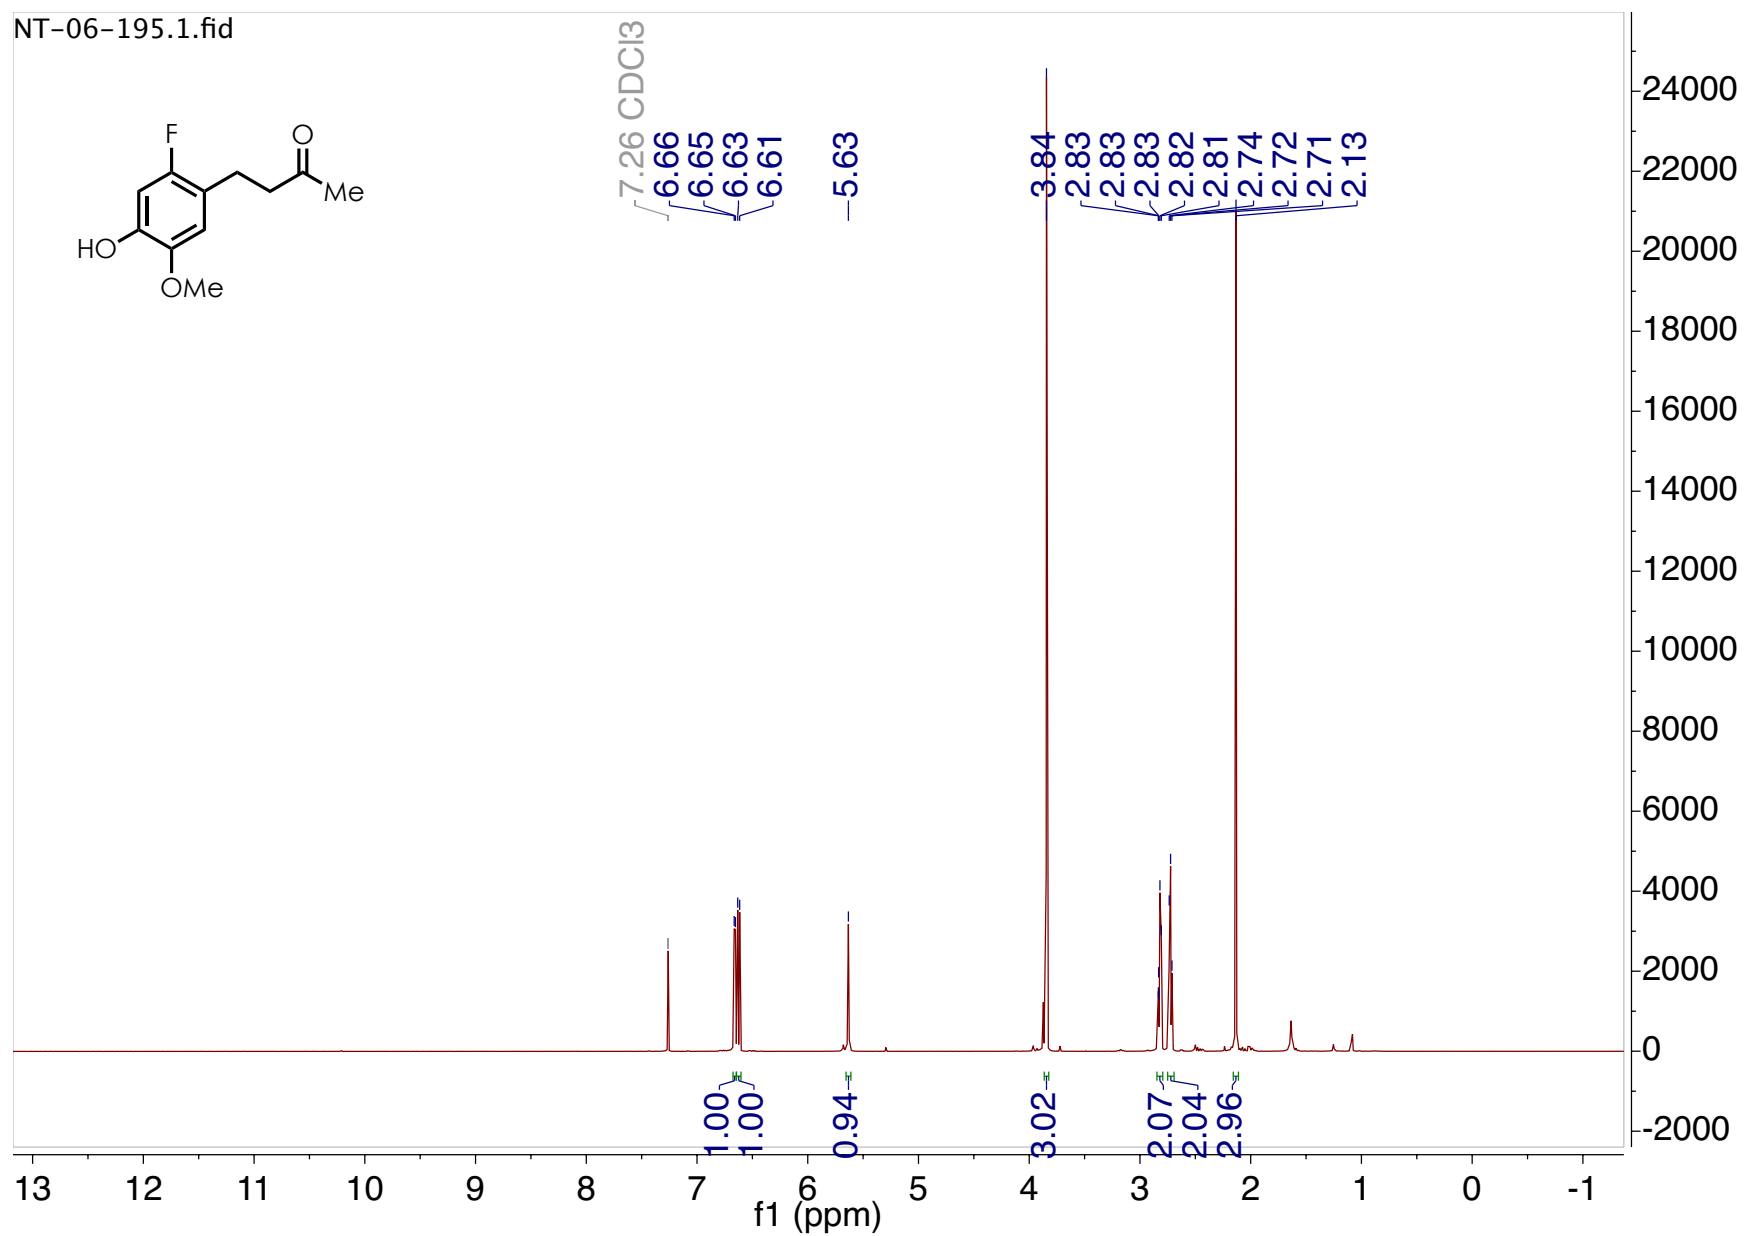

NT-06-195.2.fid

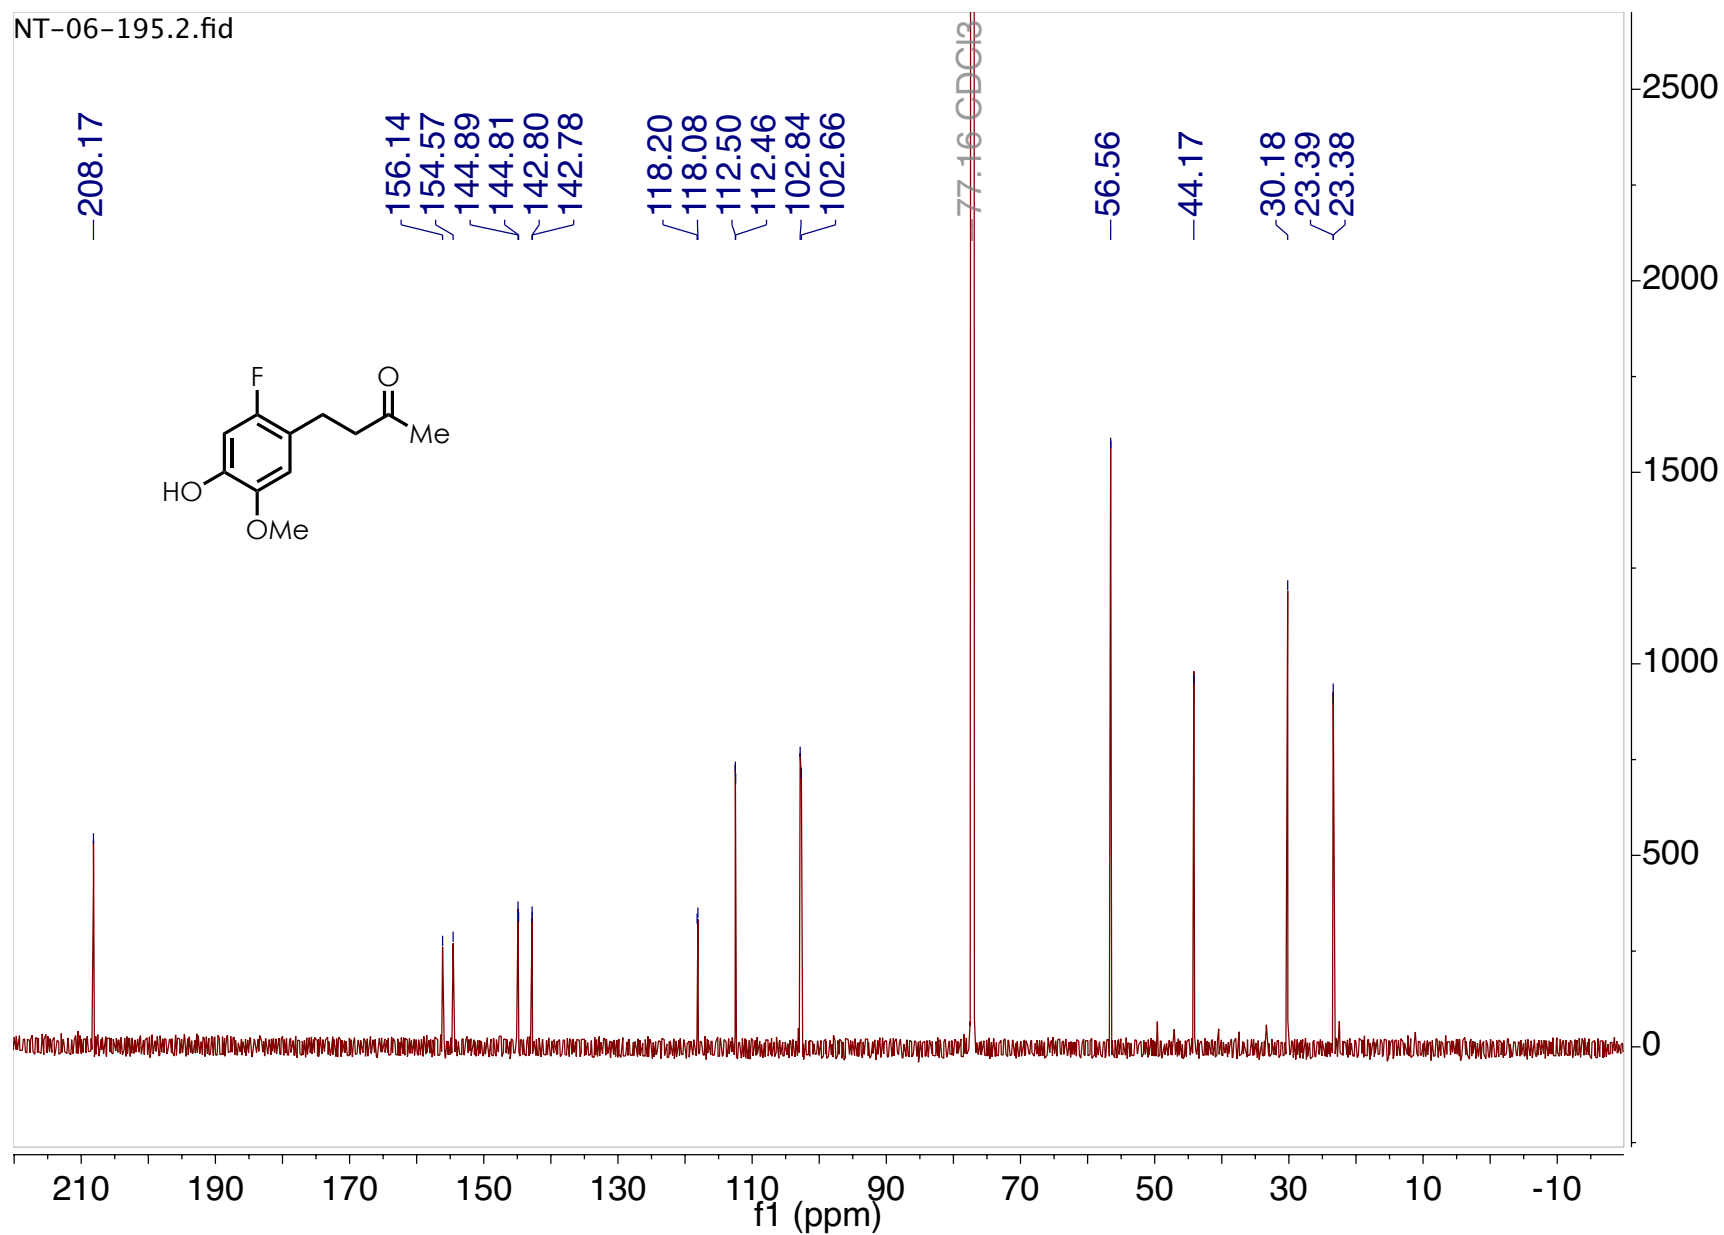

NT-06-195-19F.1.fid  
NT-06-195-19F

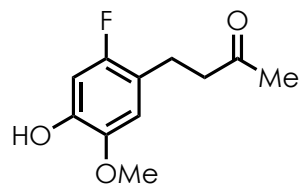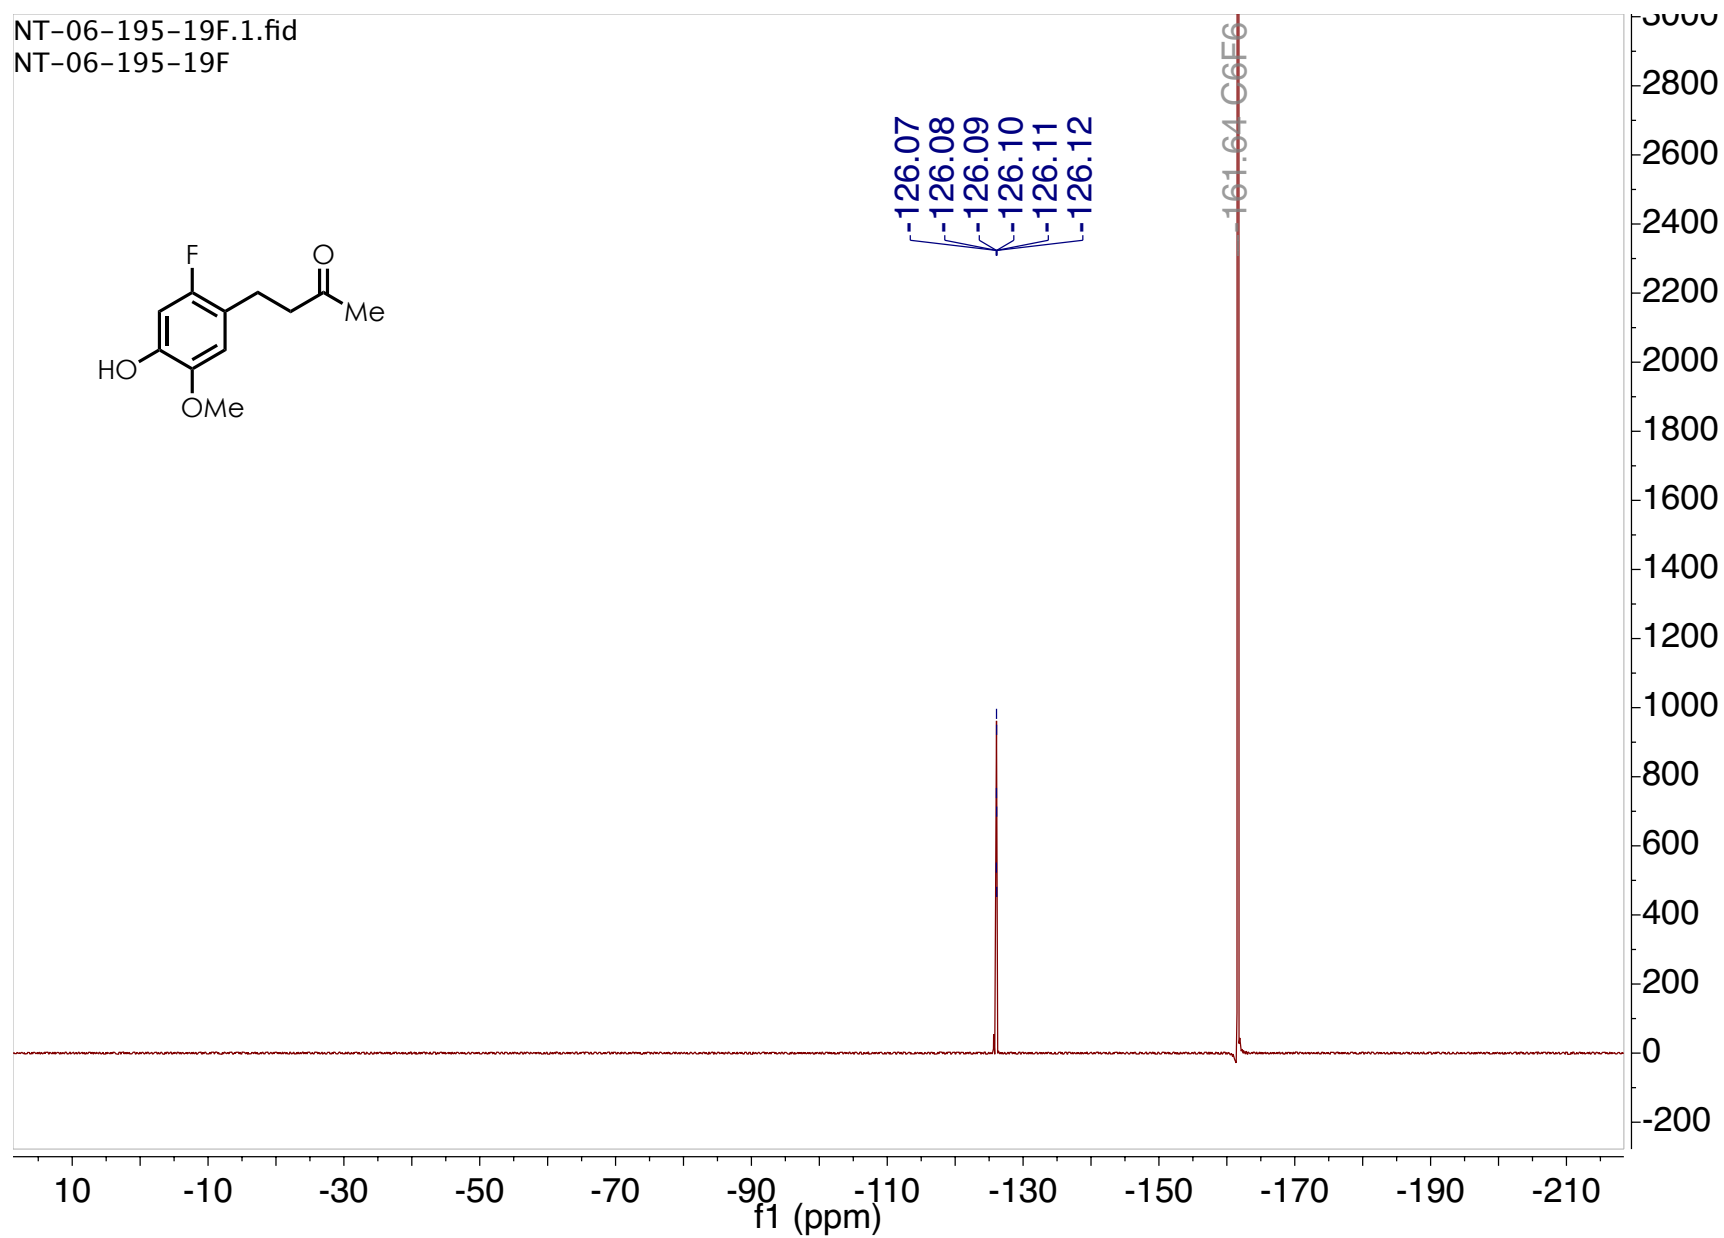

NT-06-196-1H.1.fid  
NT-06-196-1H

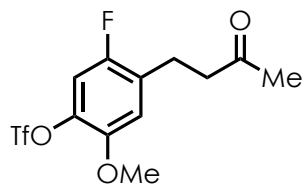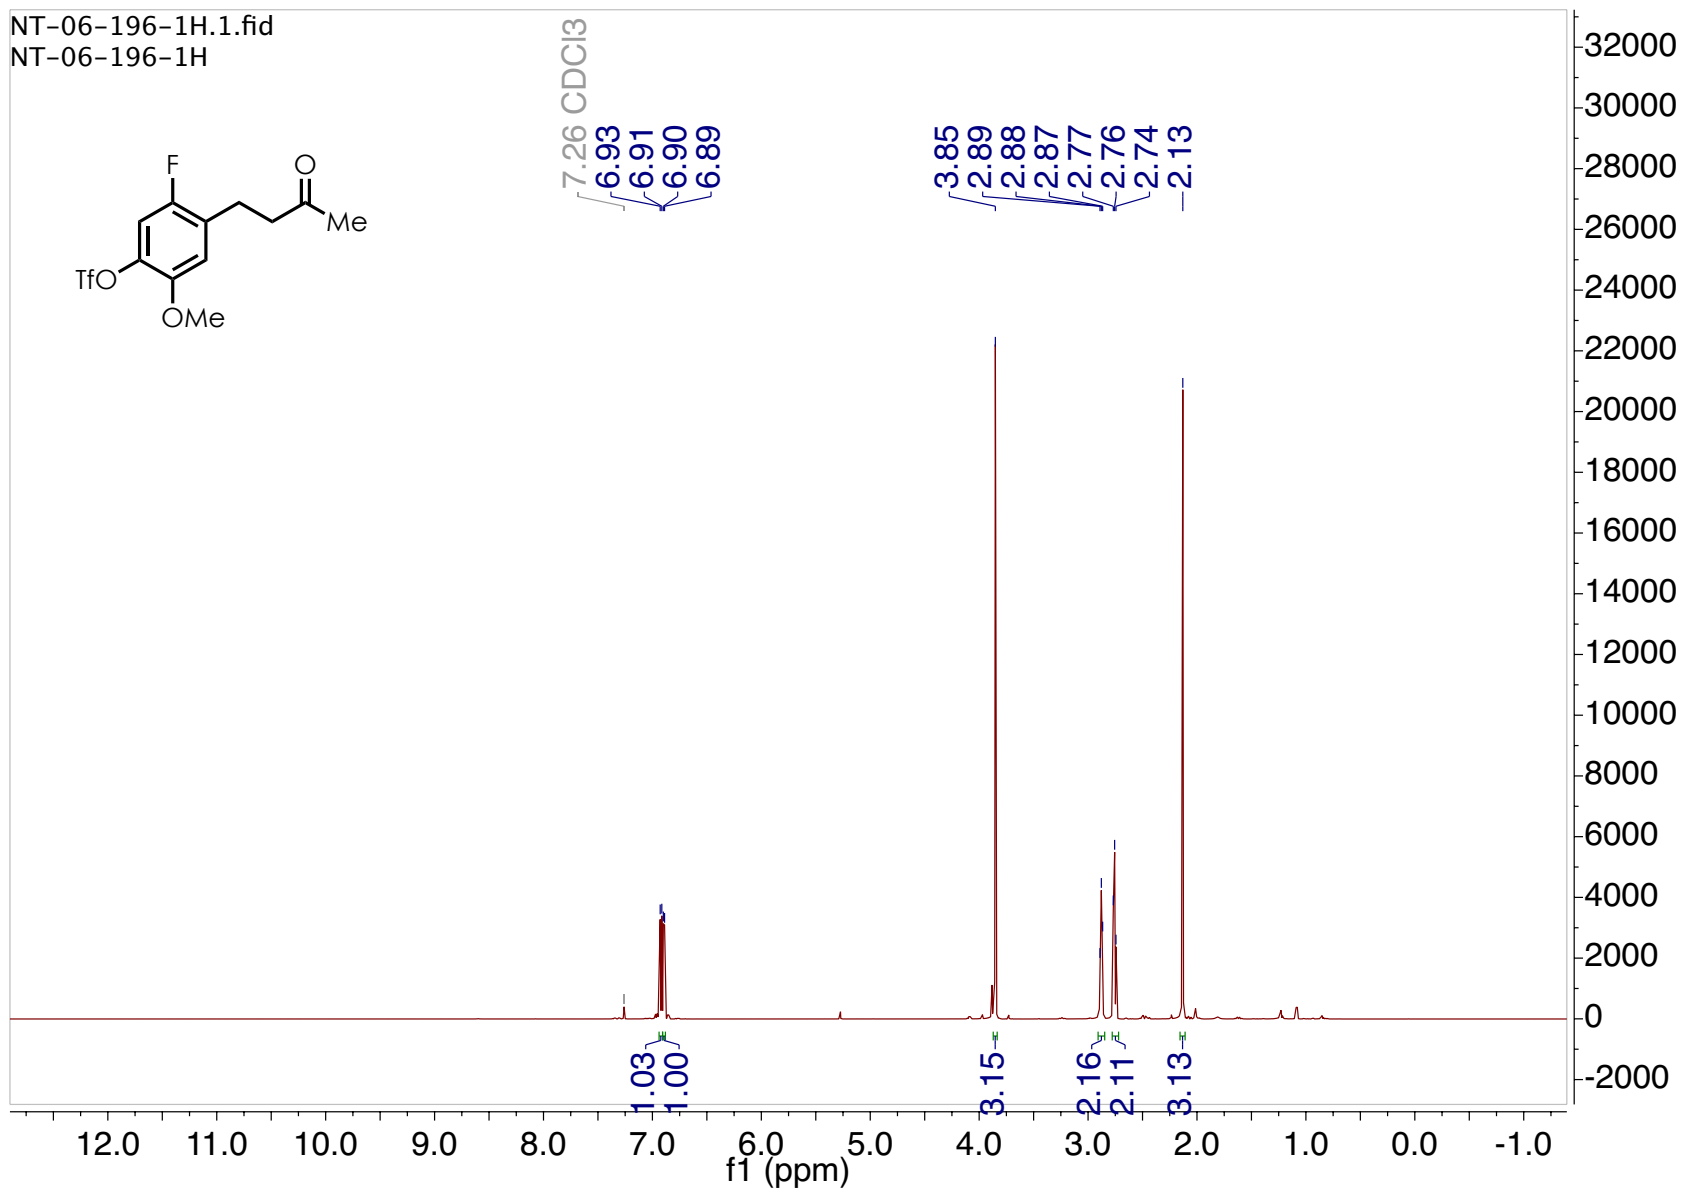

NT-06-196-13C.1.fid  
NT-06-196-13C

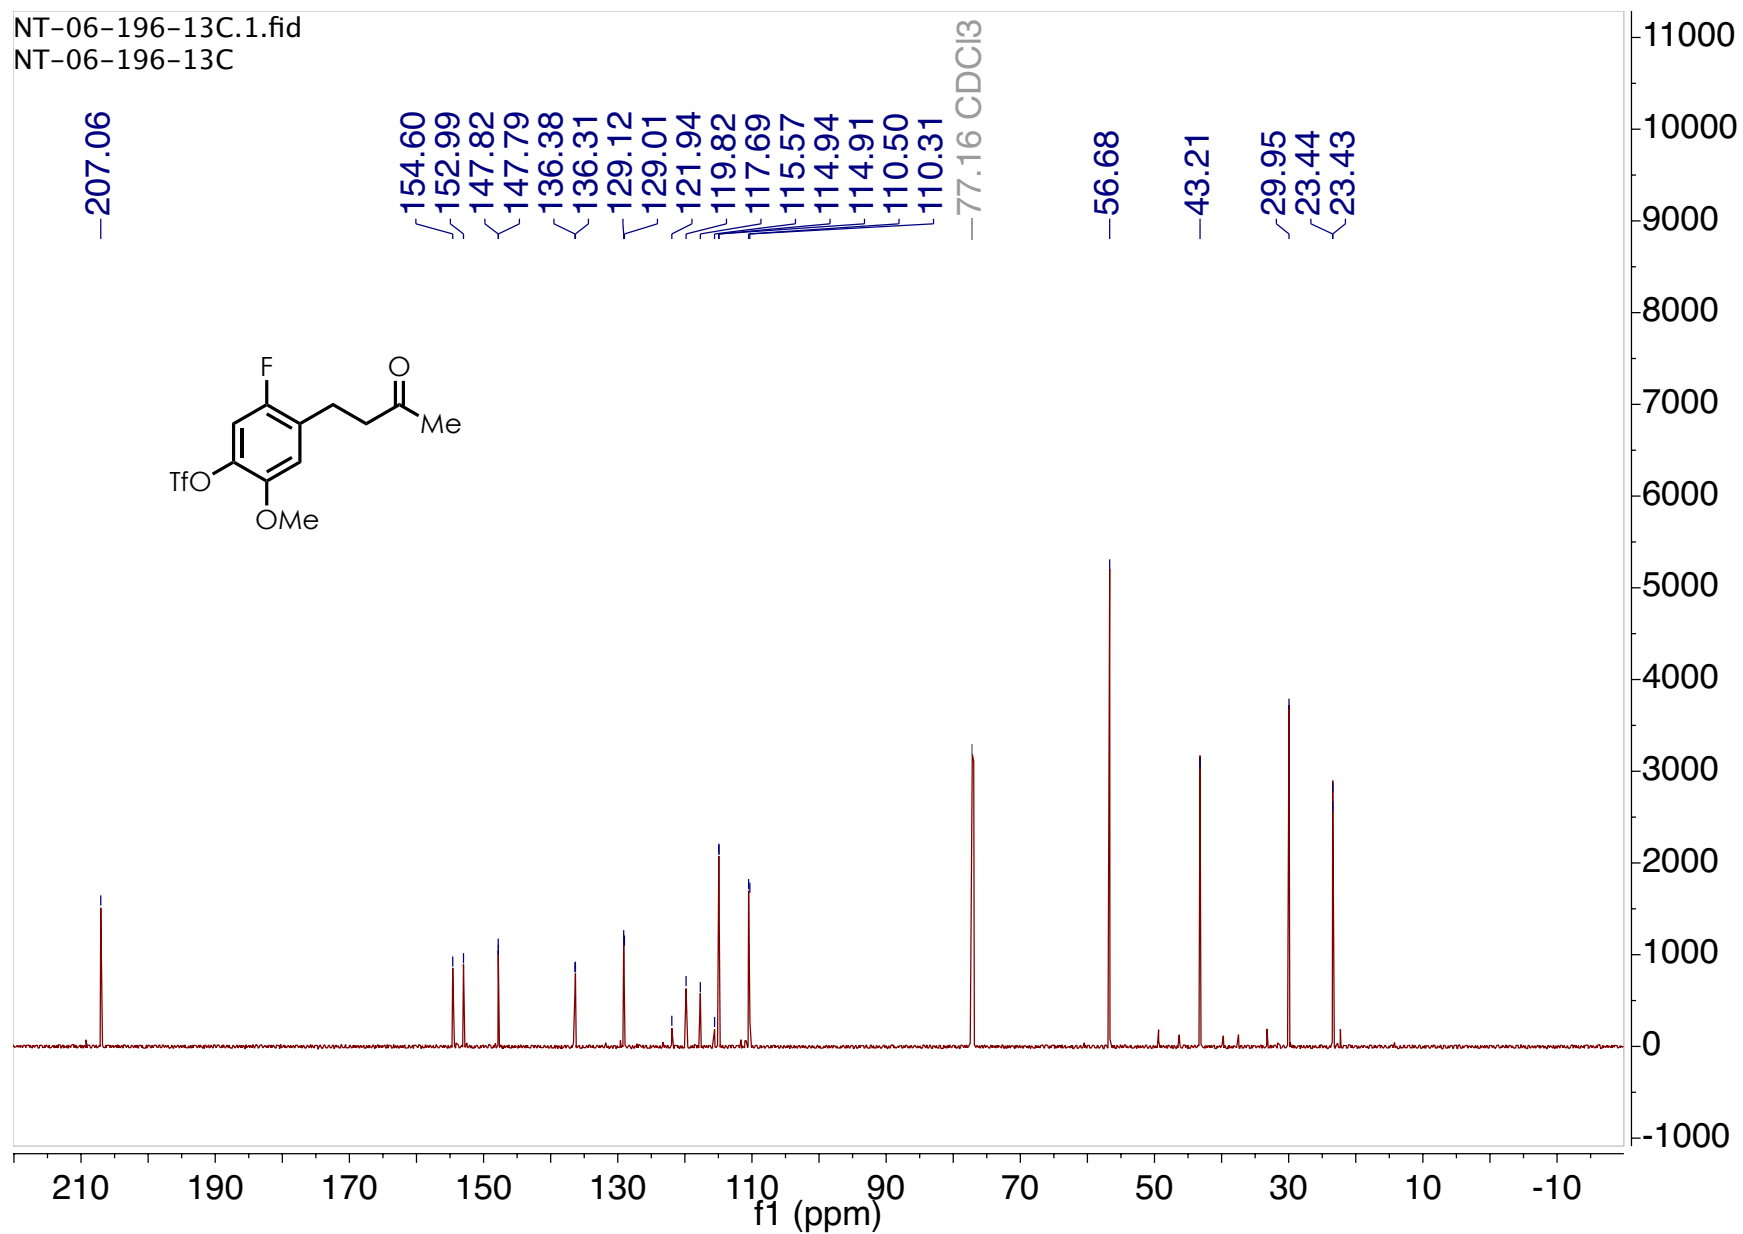

NT-06-196-19F.1.fid

NT-06-196-19F

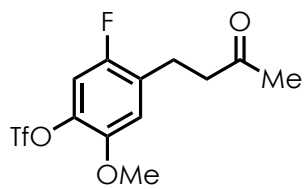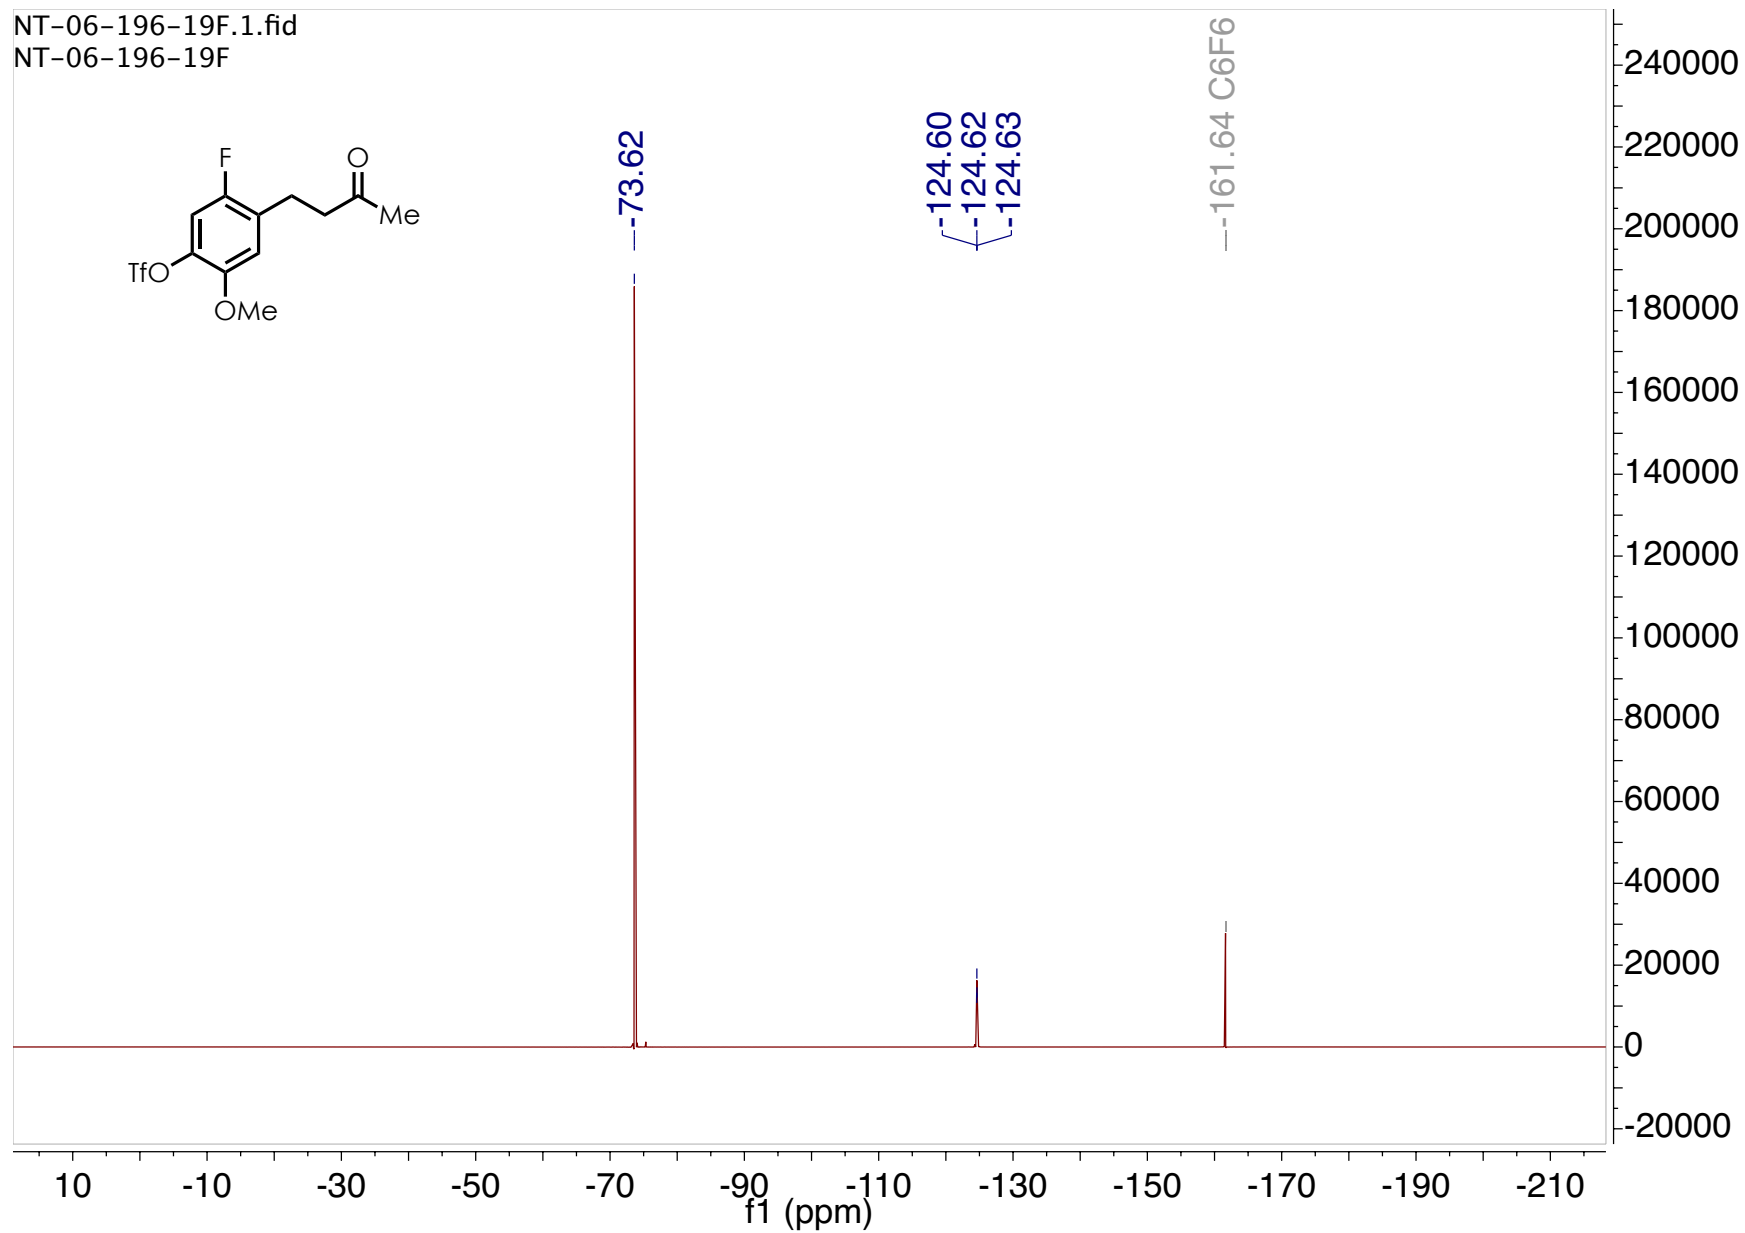

NT-05-208.1.fid  
Nicewicz  
C3308  
ntay  
NT-05-208

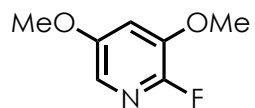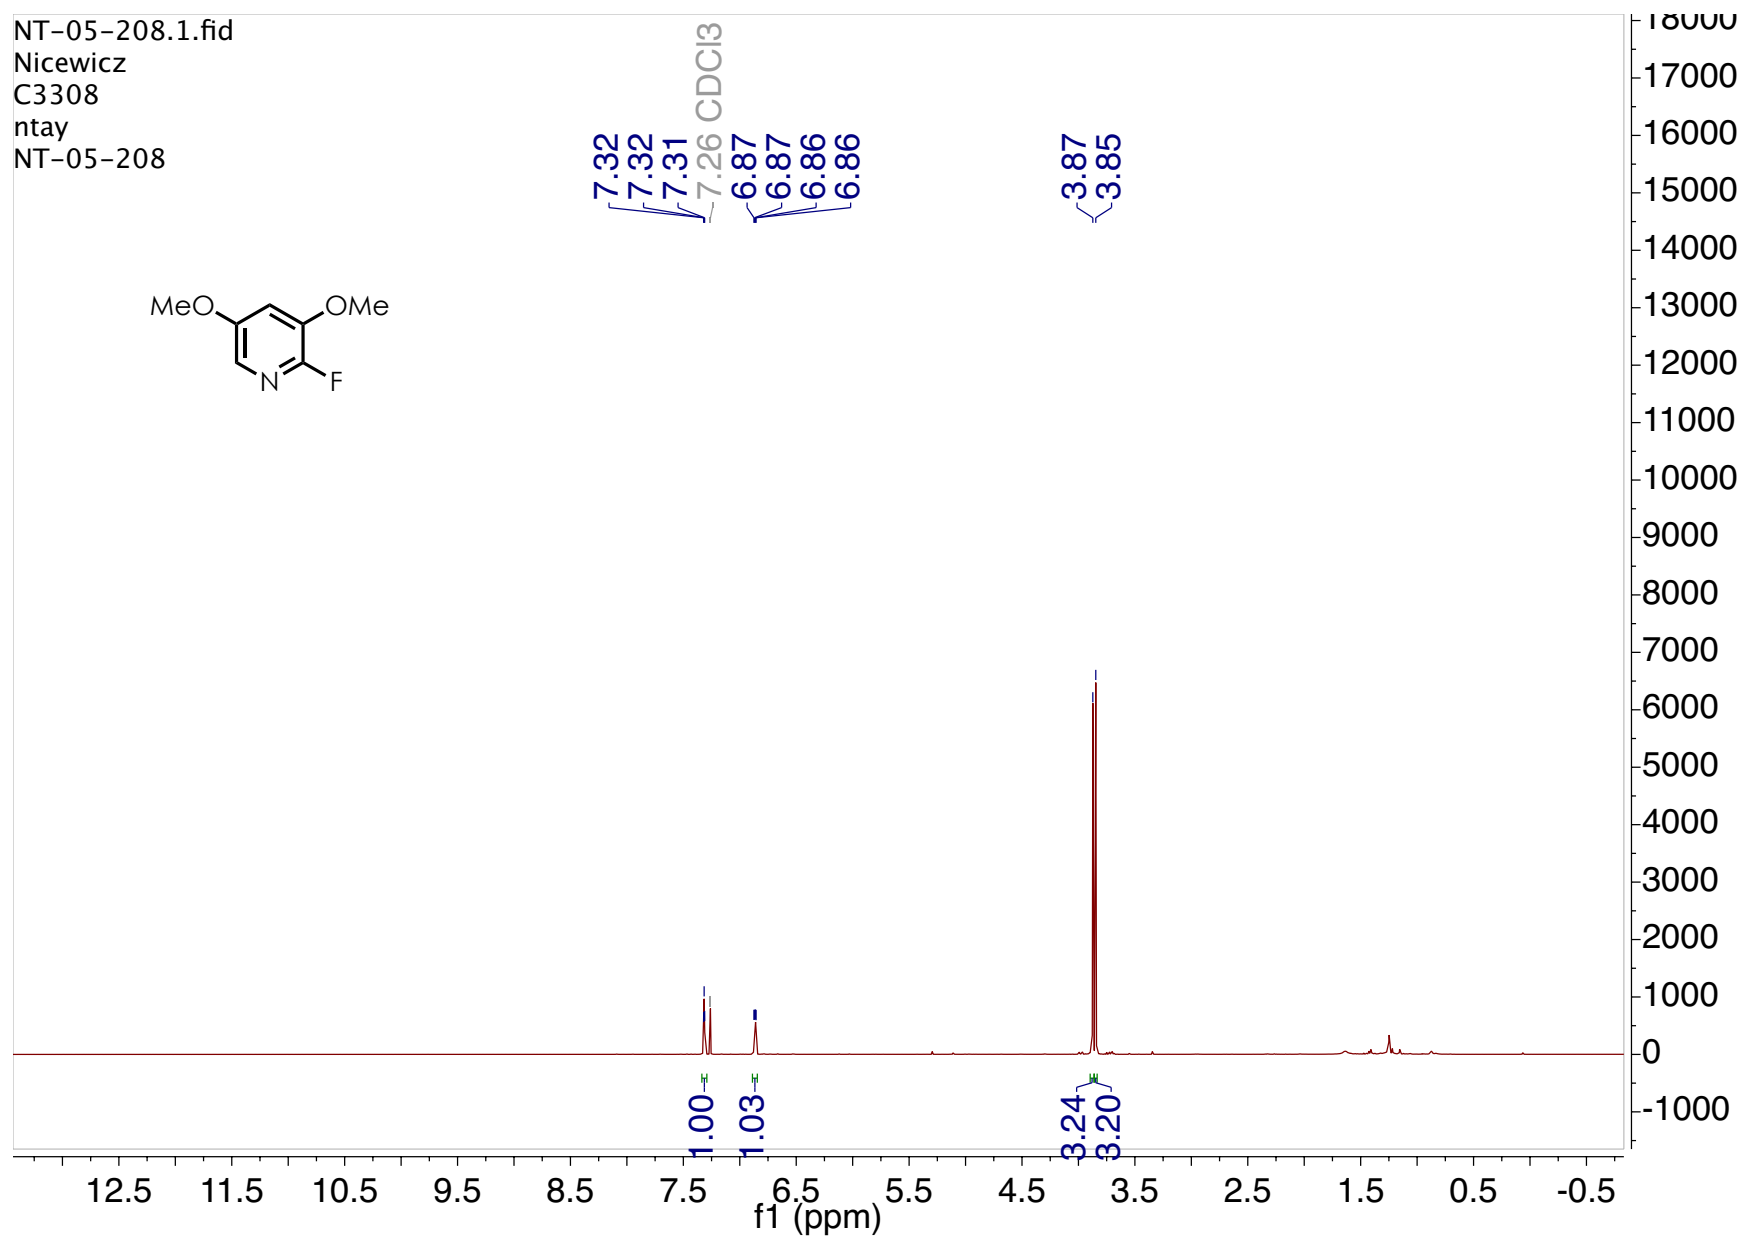

NT-05-208 2.2.fid  
Nicewicz  
C3308  
ntay  
NT-05-208

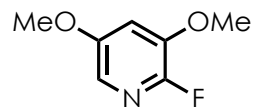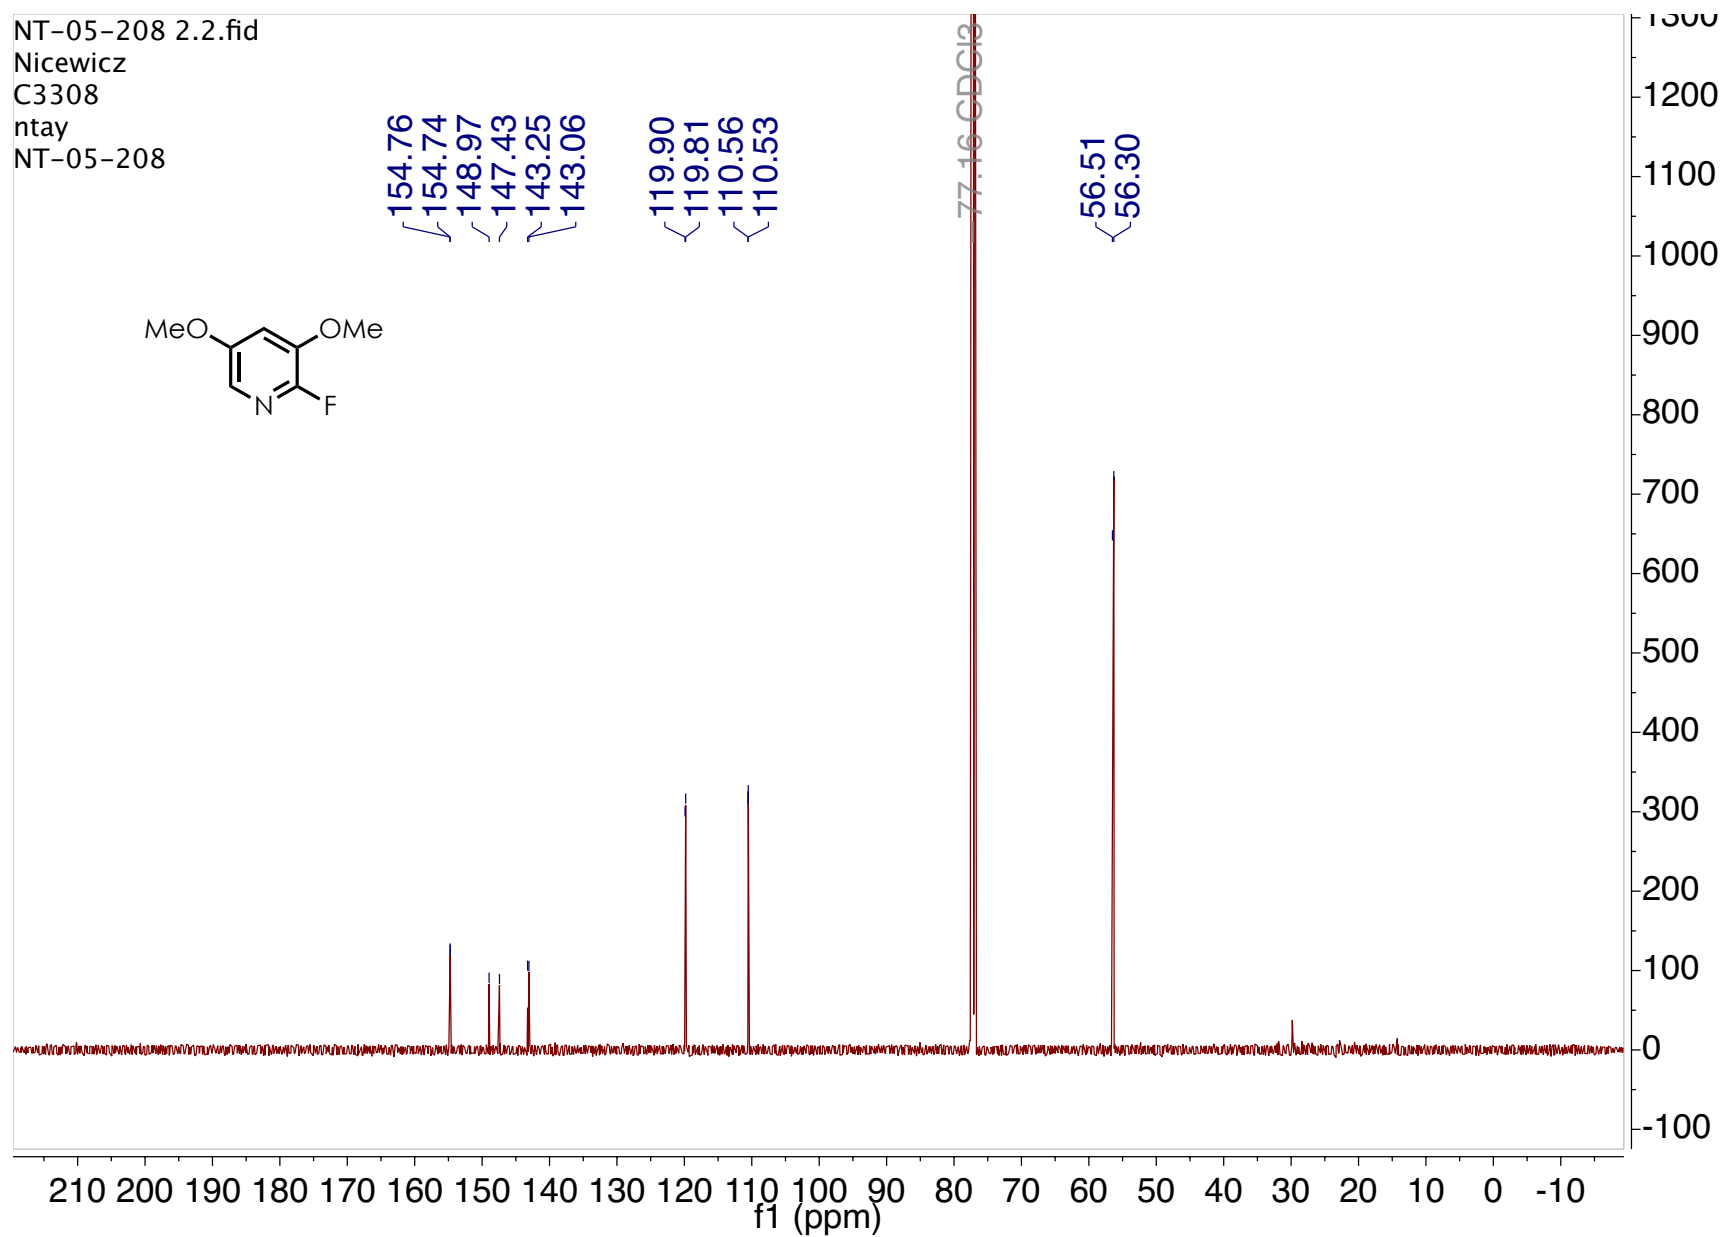

NT-05-208-19F 2.1.fid  
F19 CDCl3 {C:\data\ntay} nmrsu 3

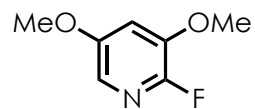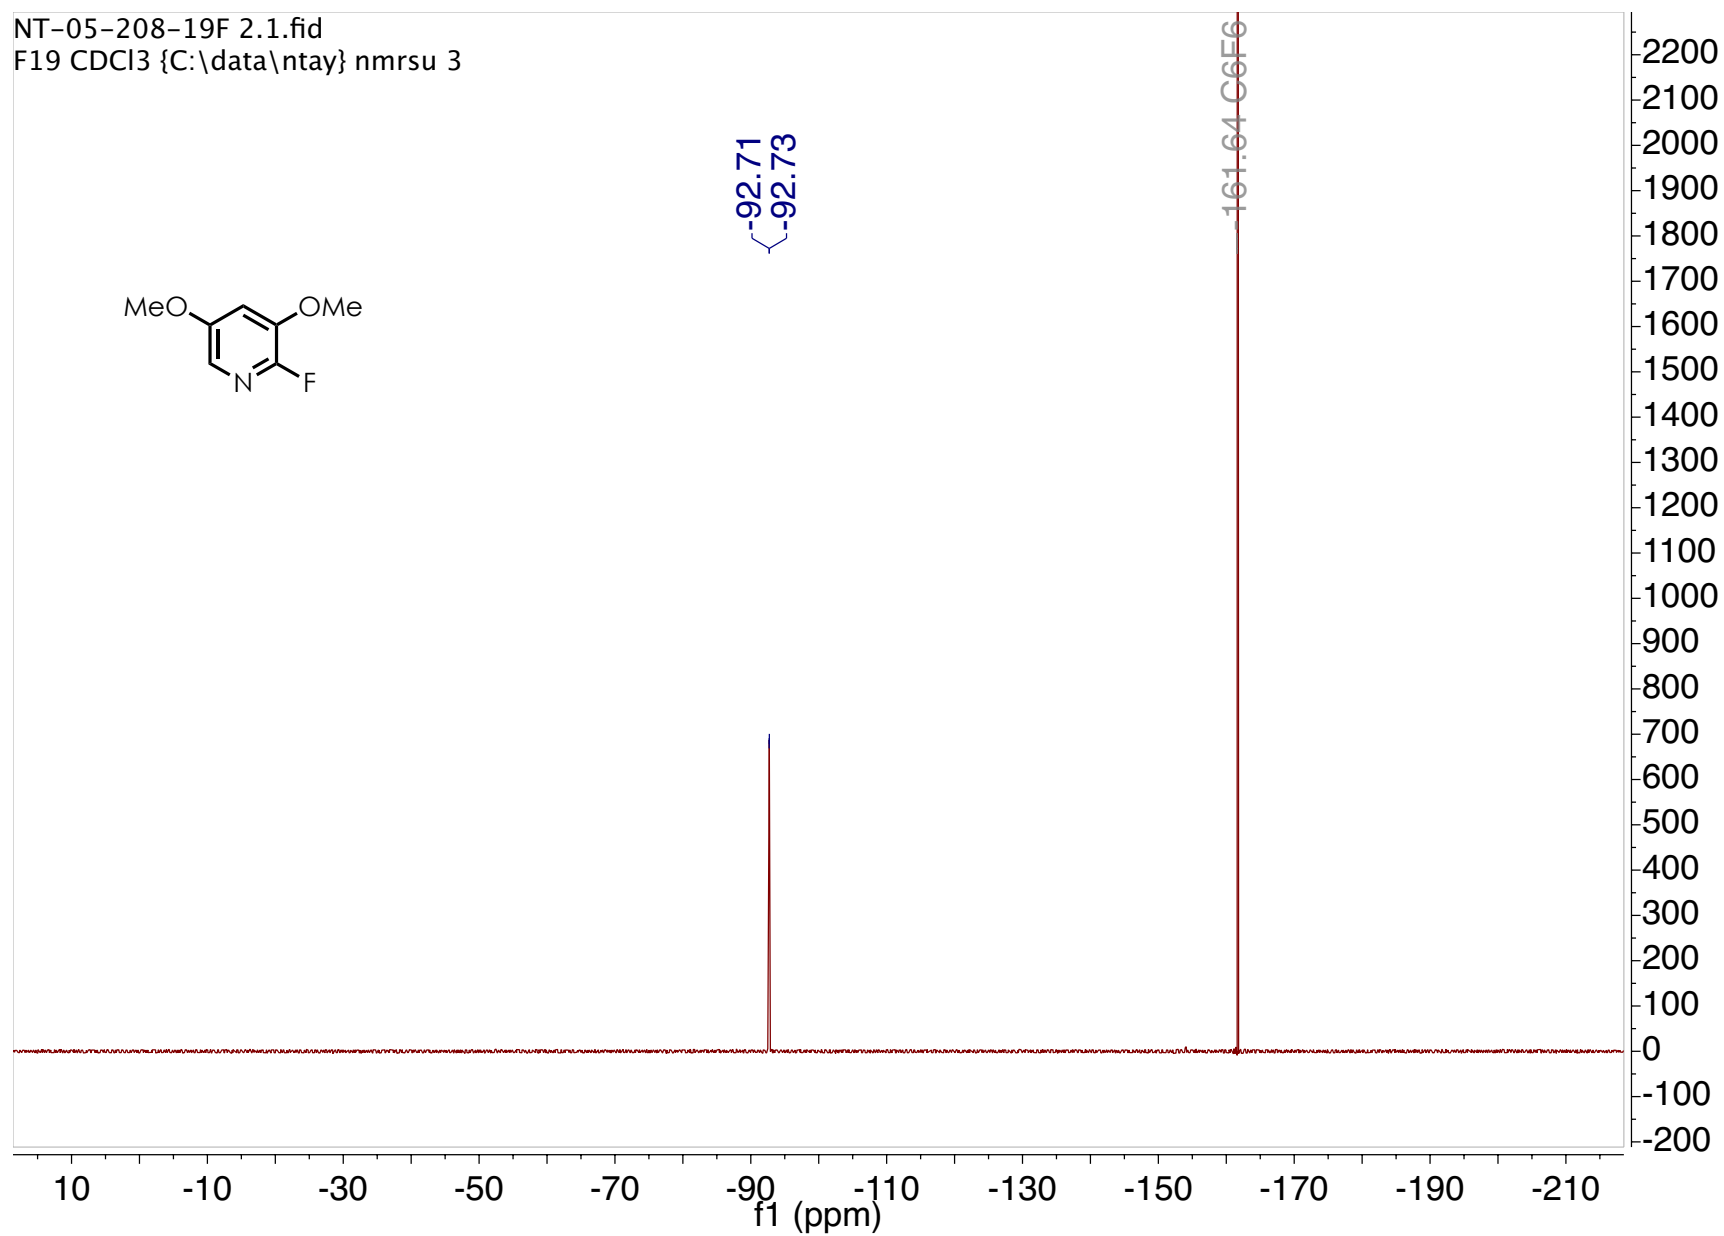

nickolas\_tay\_072018.1.fid  
5-224

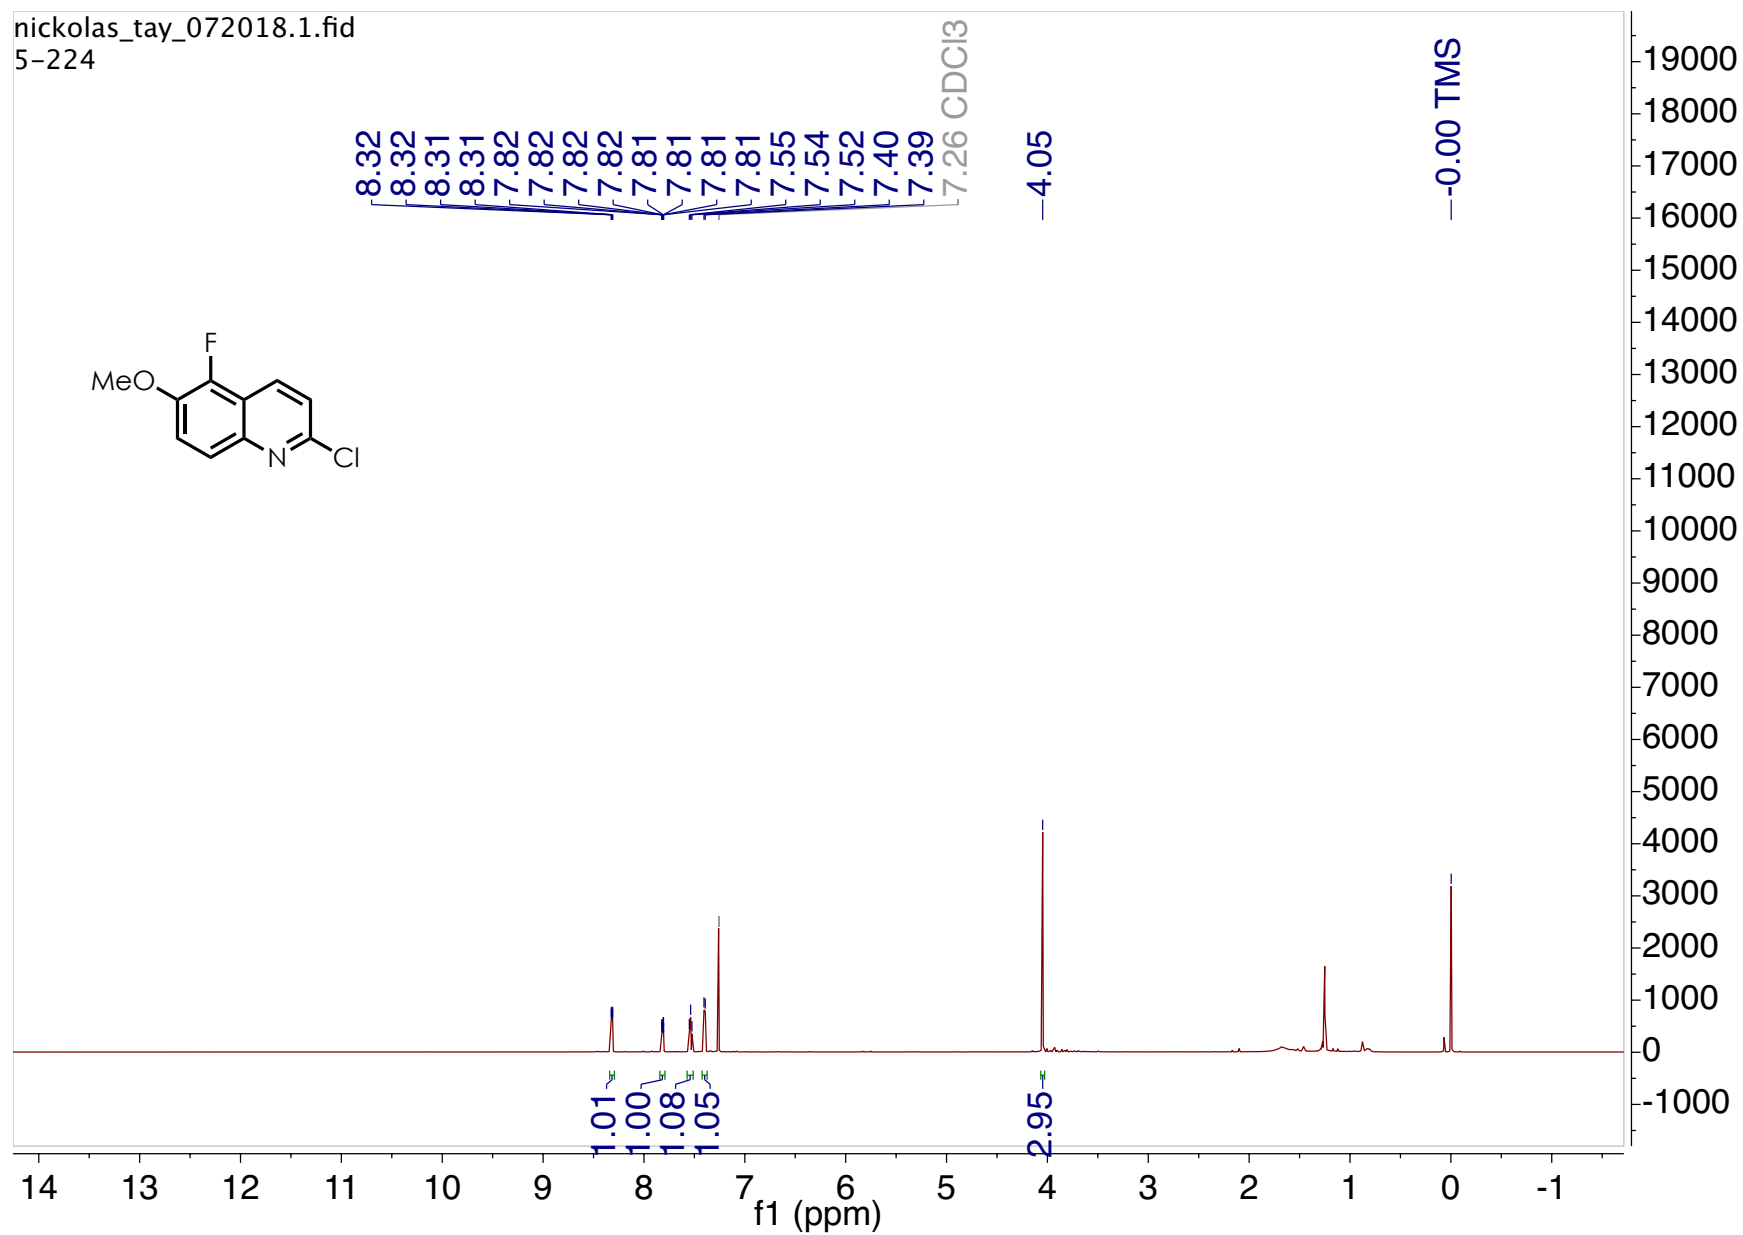

nickolas\_tay\_072018.2.fid  
5-224

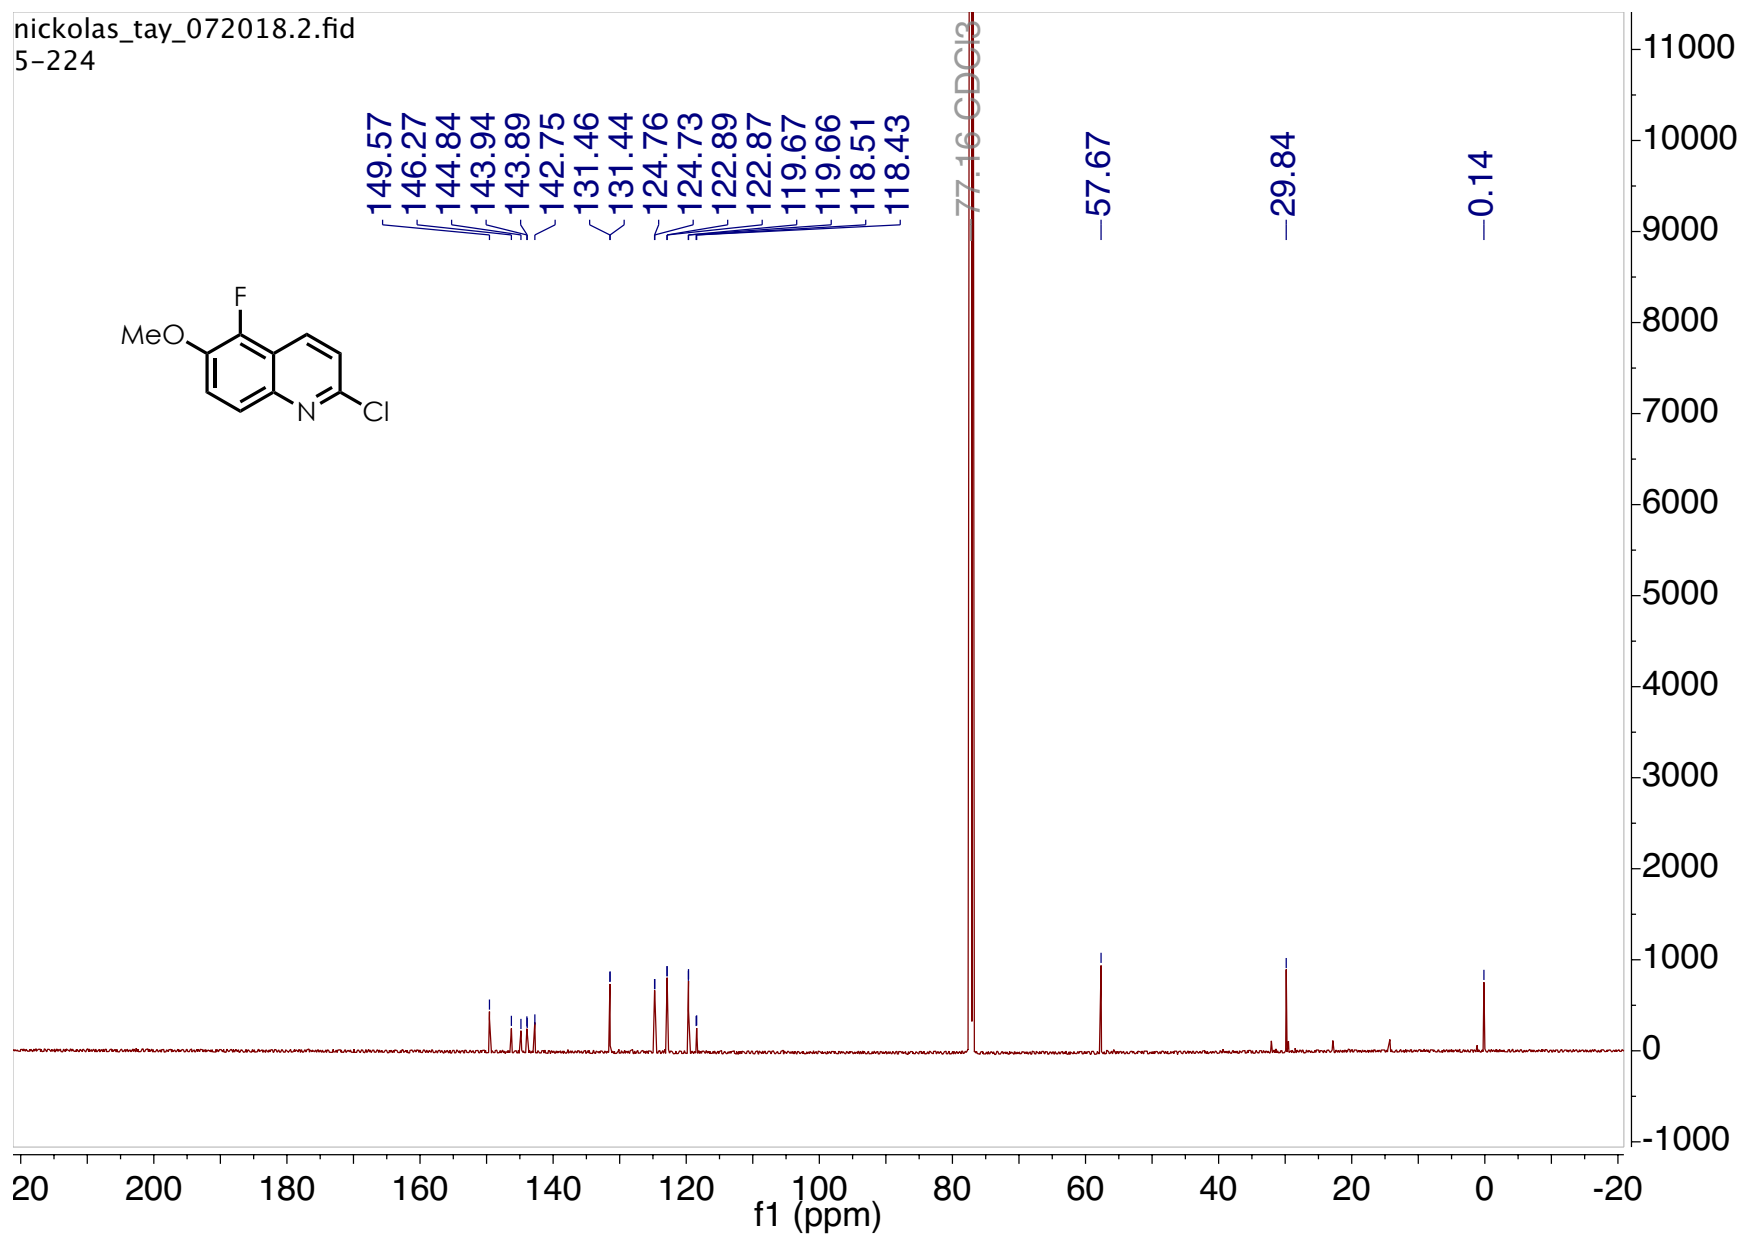

NT-05-224-19F.2.fid  
F19 CDCl3 {C:\data\ntay} nmrsu 9

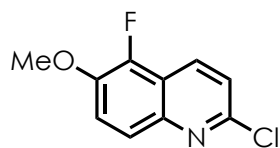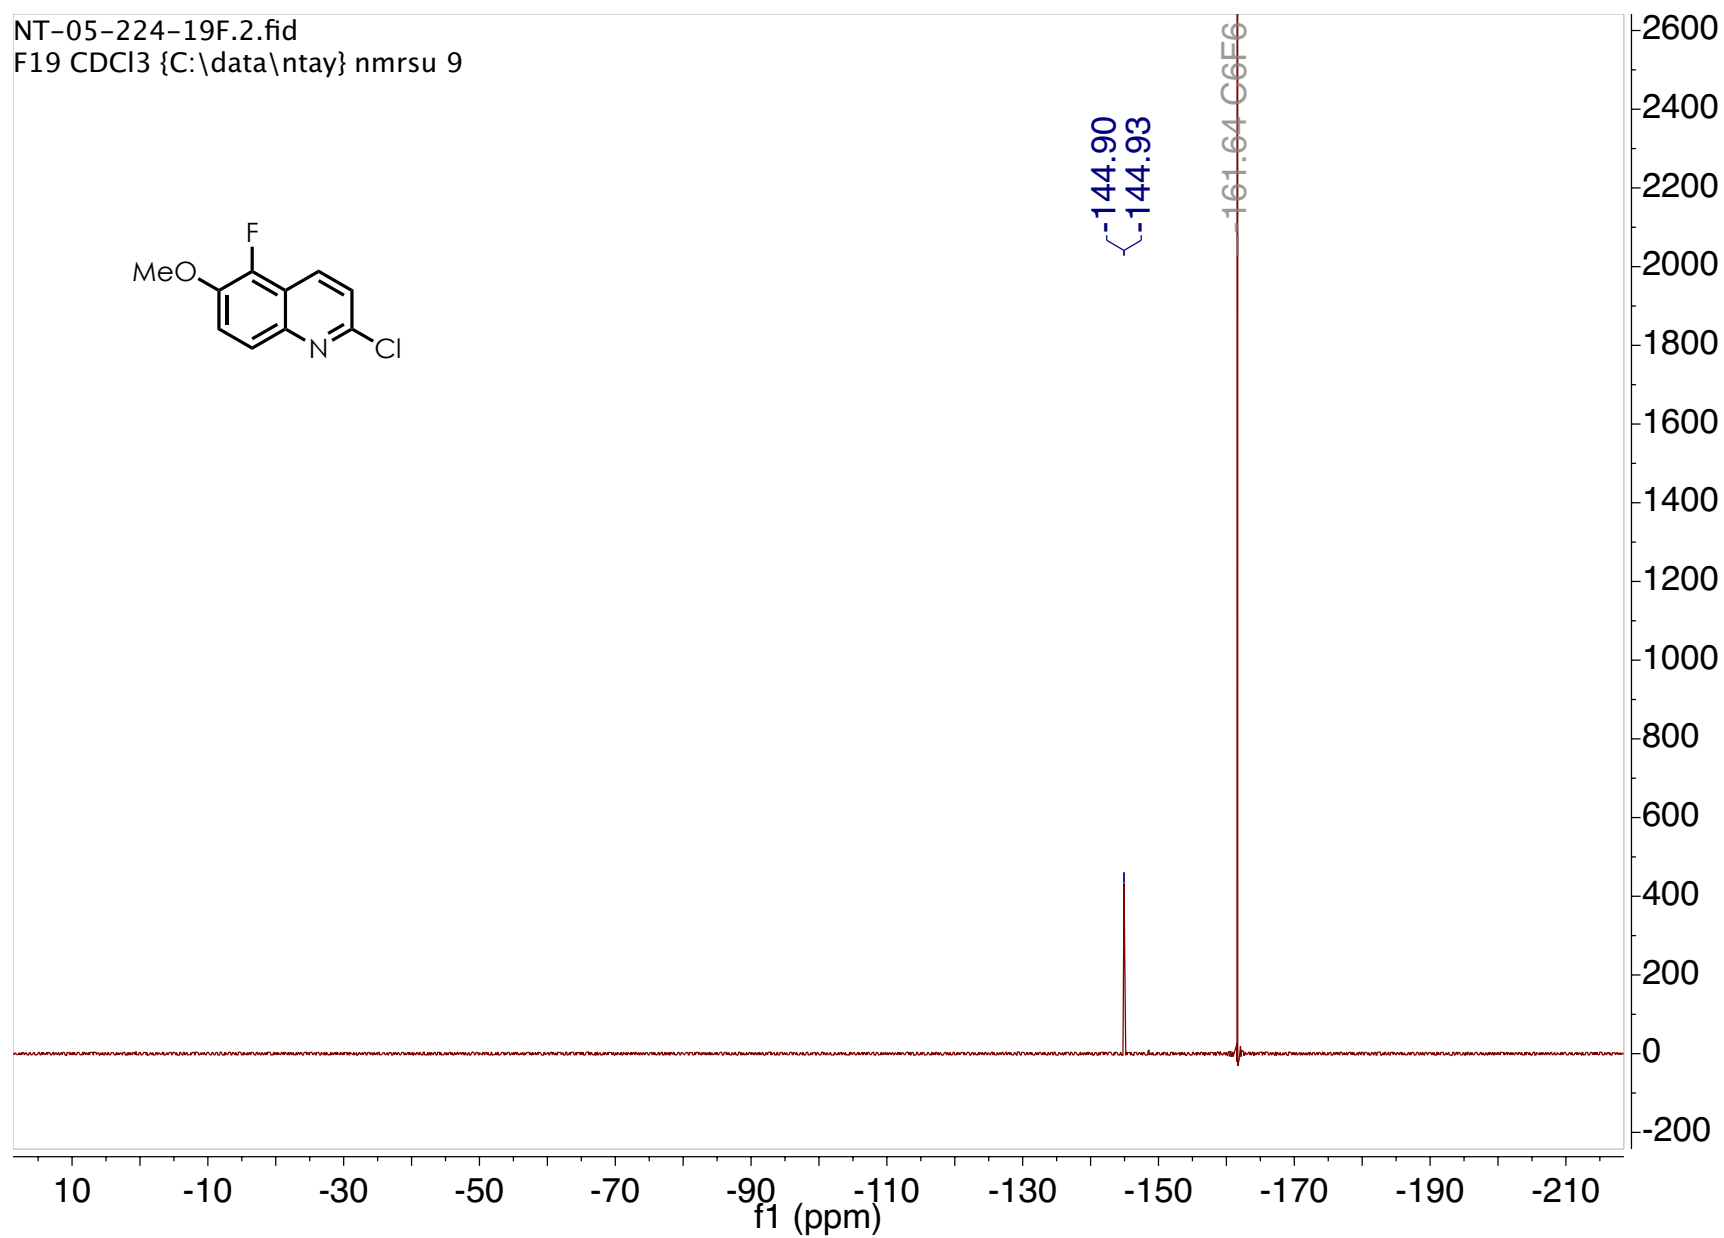

NT-04-239.1.fid

Nicewicz

5106082

ntay

NT-04-239

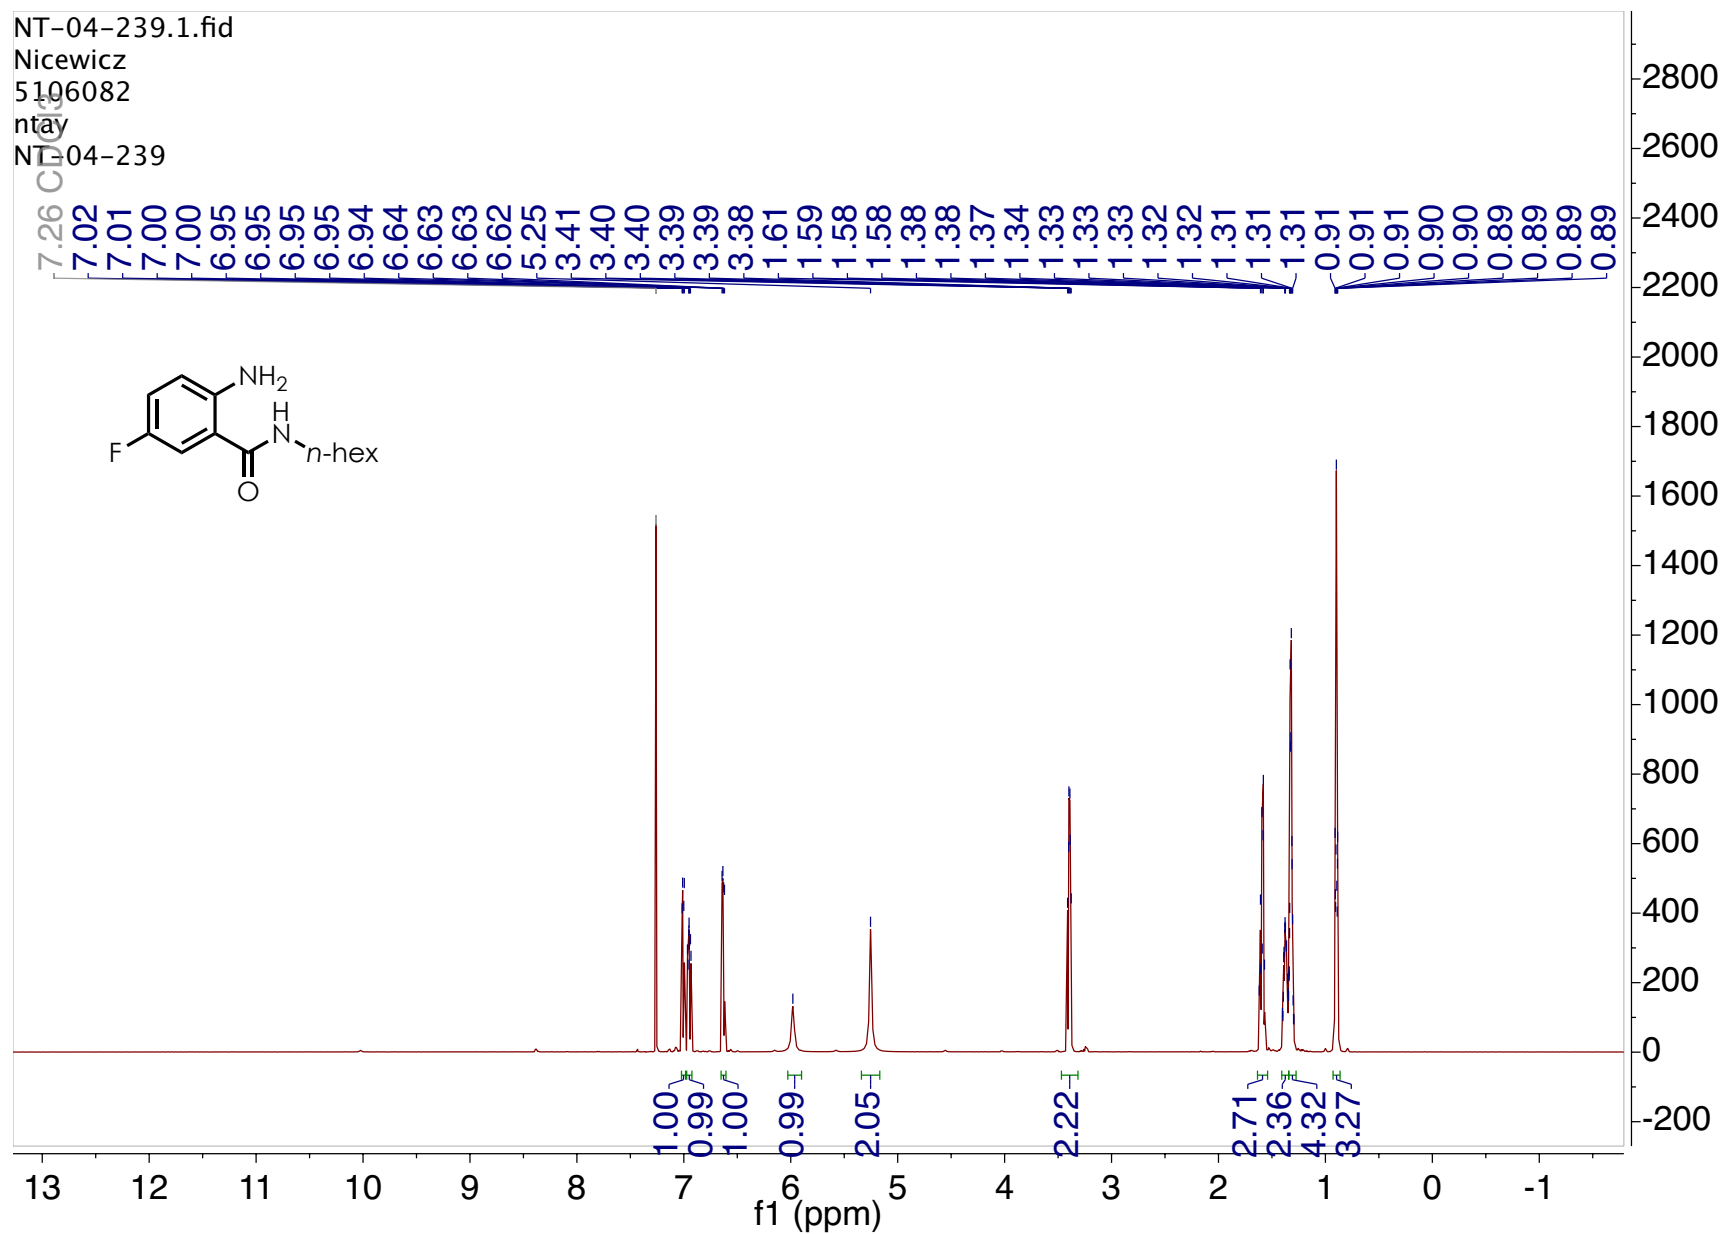

NT-04-239-13C.1.fid  
NT-04-239-13C

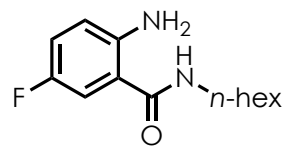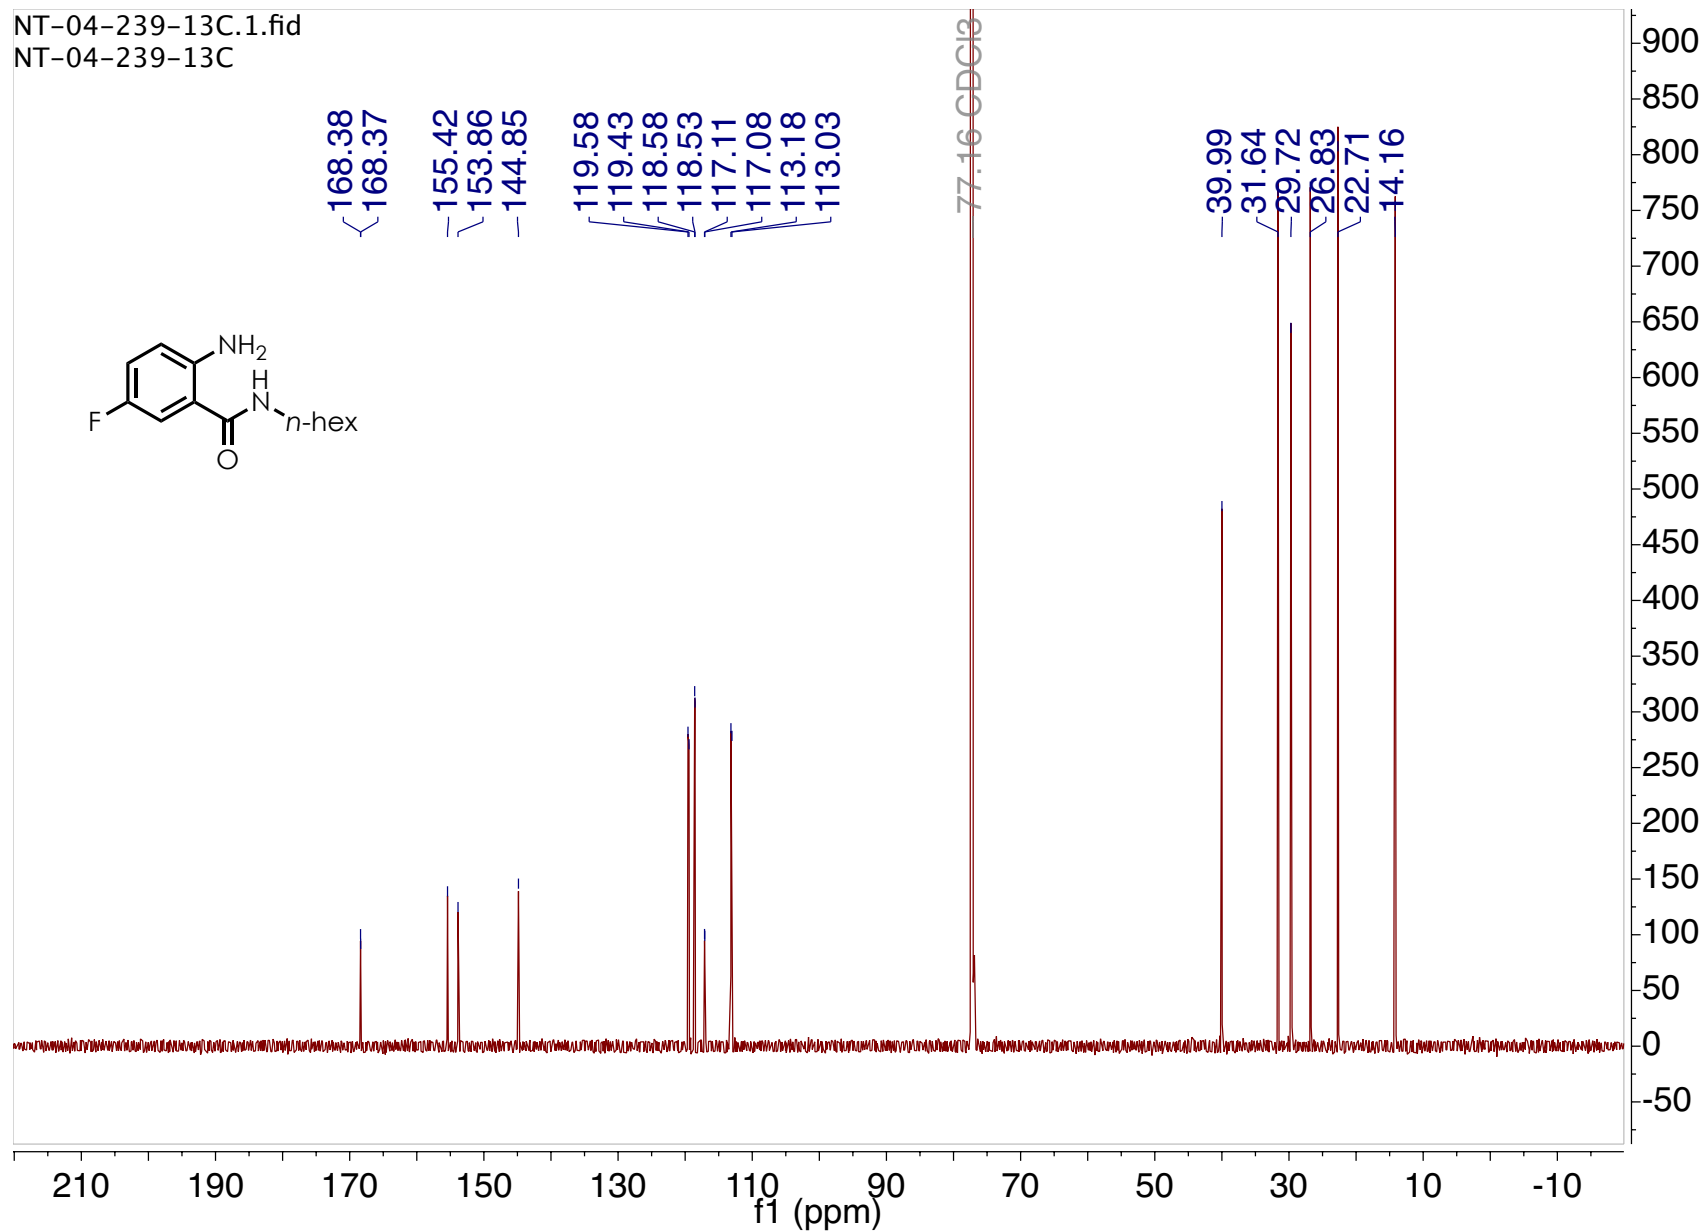

NT-04-239-19F 2.2.fid  
F19 CDCl3 {C:\data\ntay} nmrsu 4

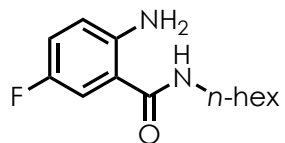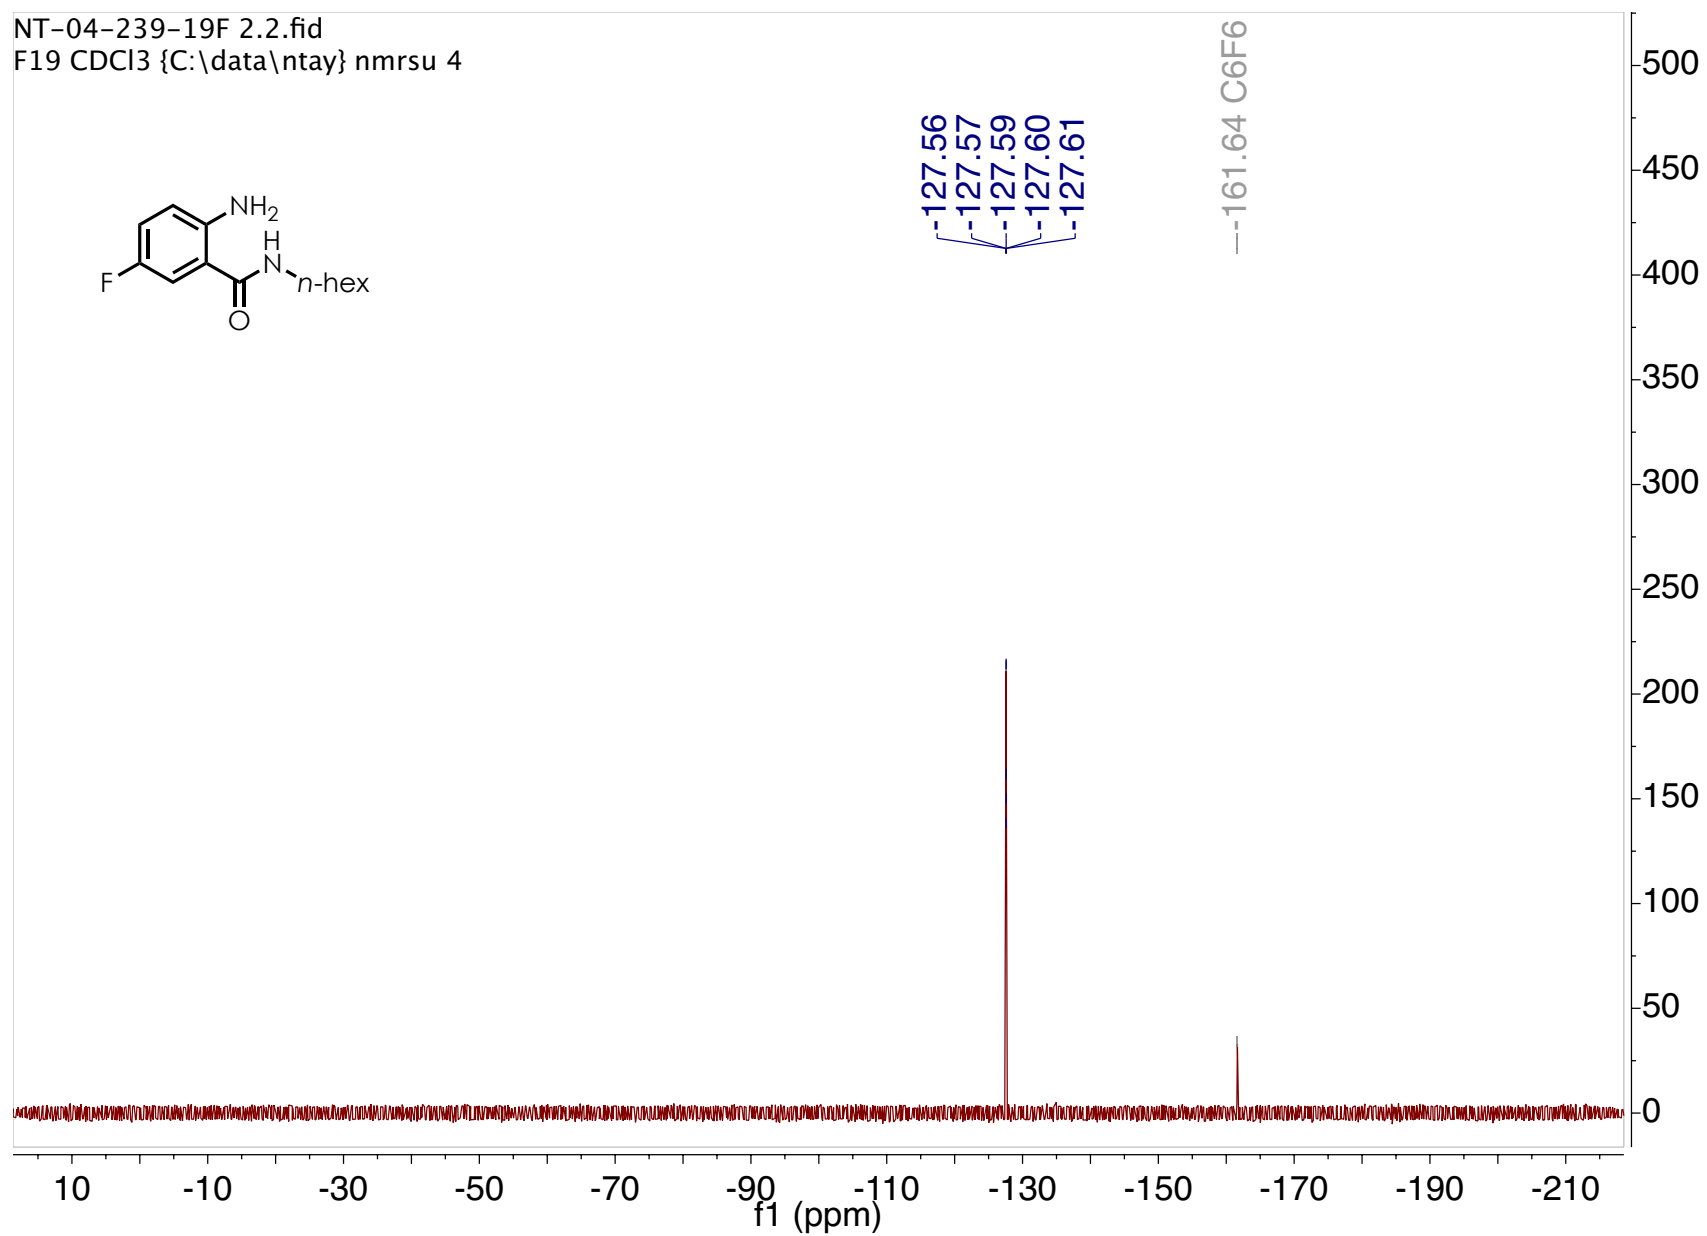

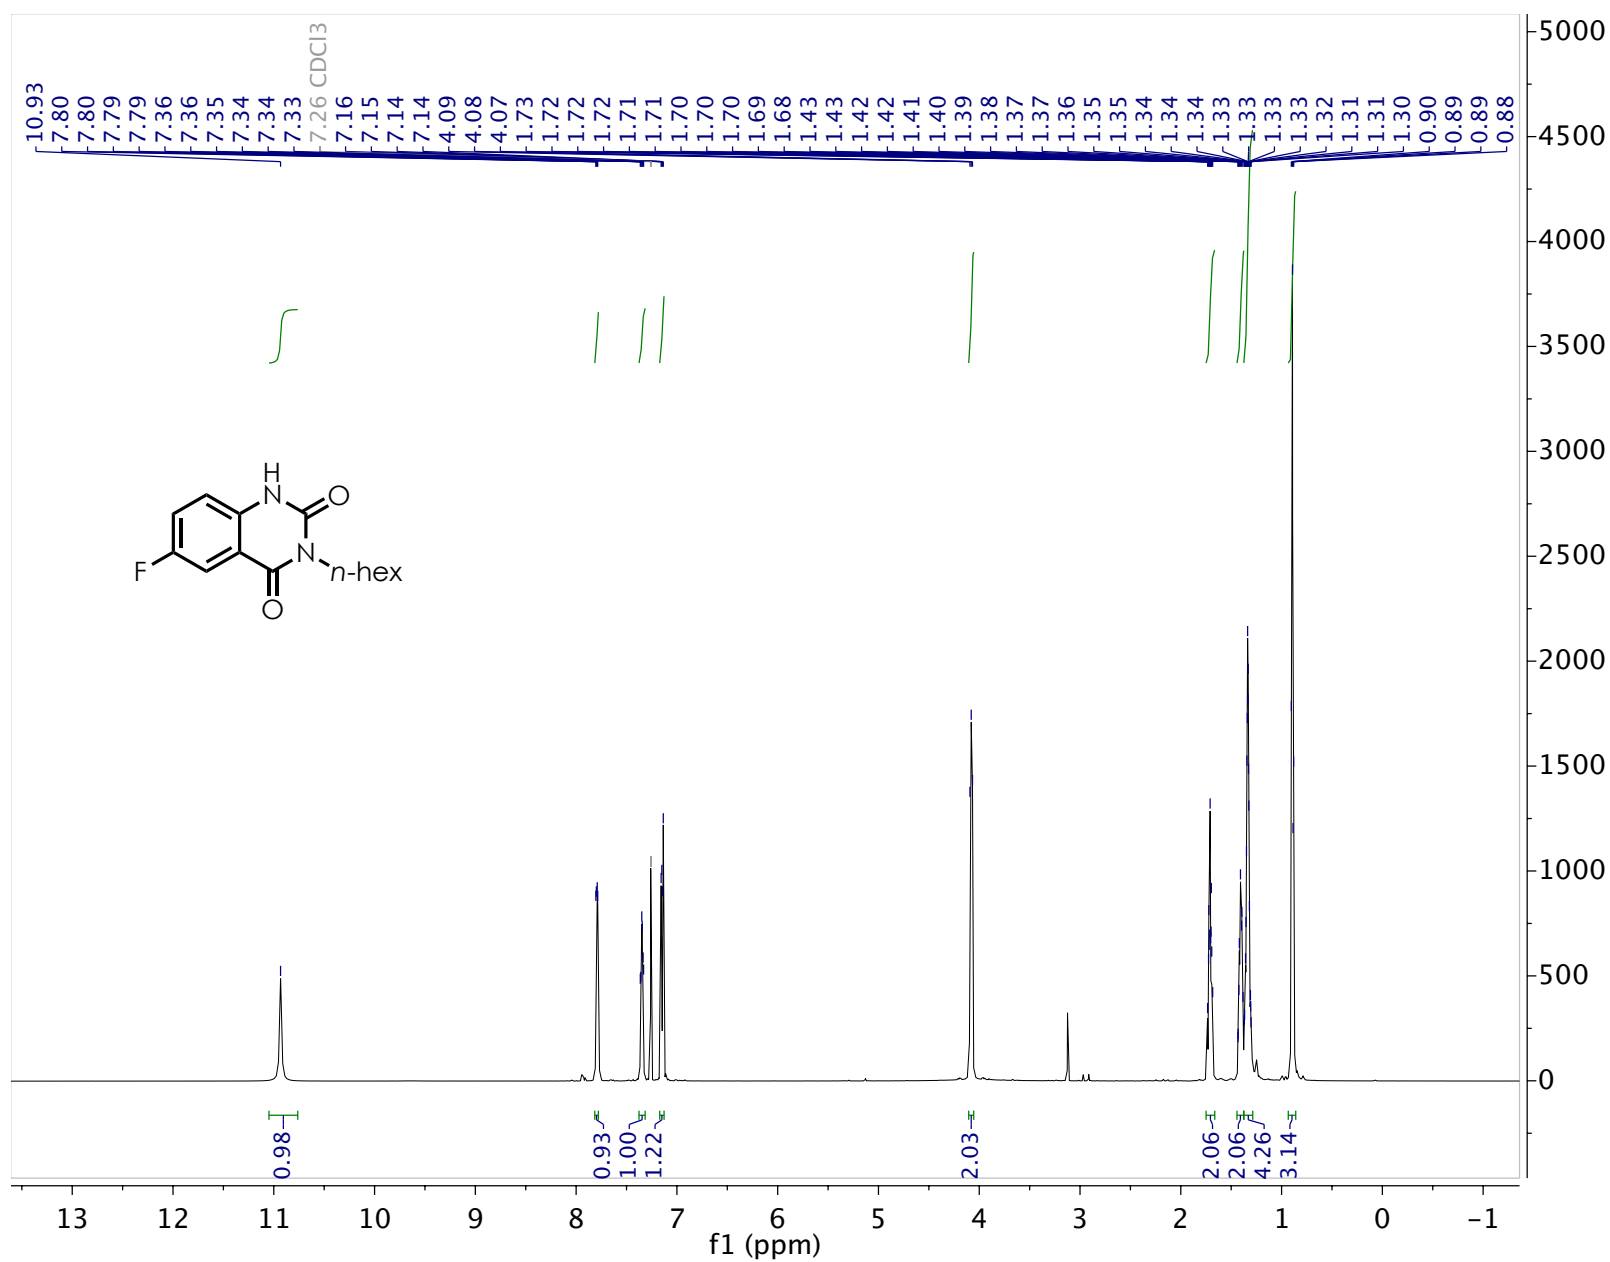

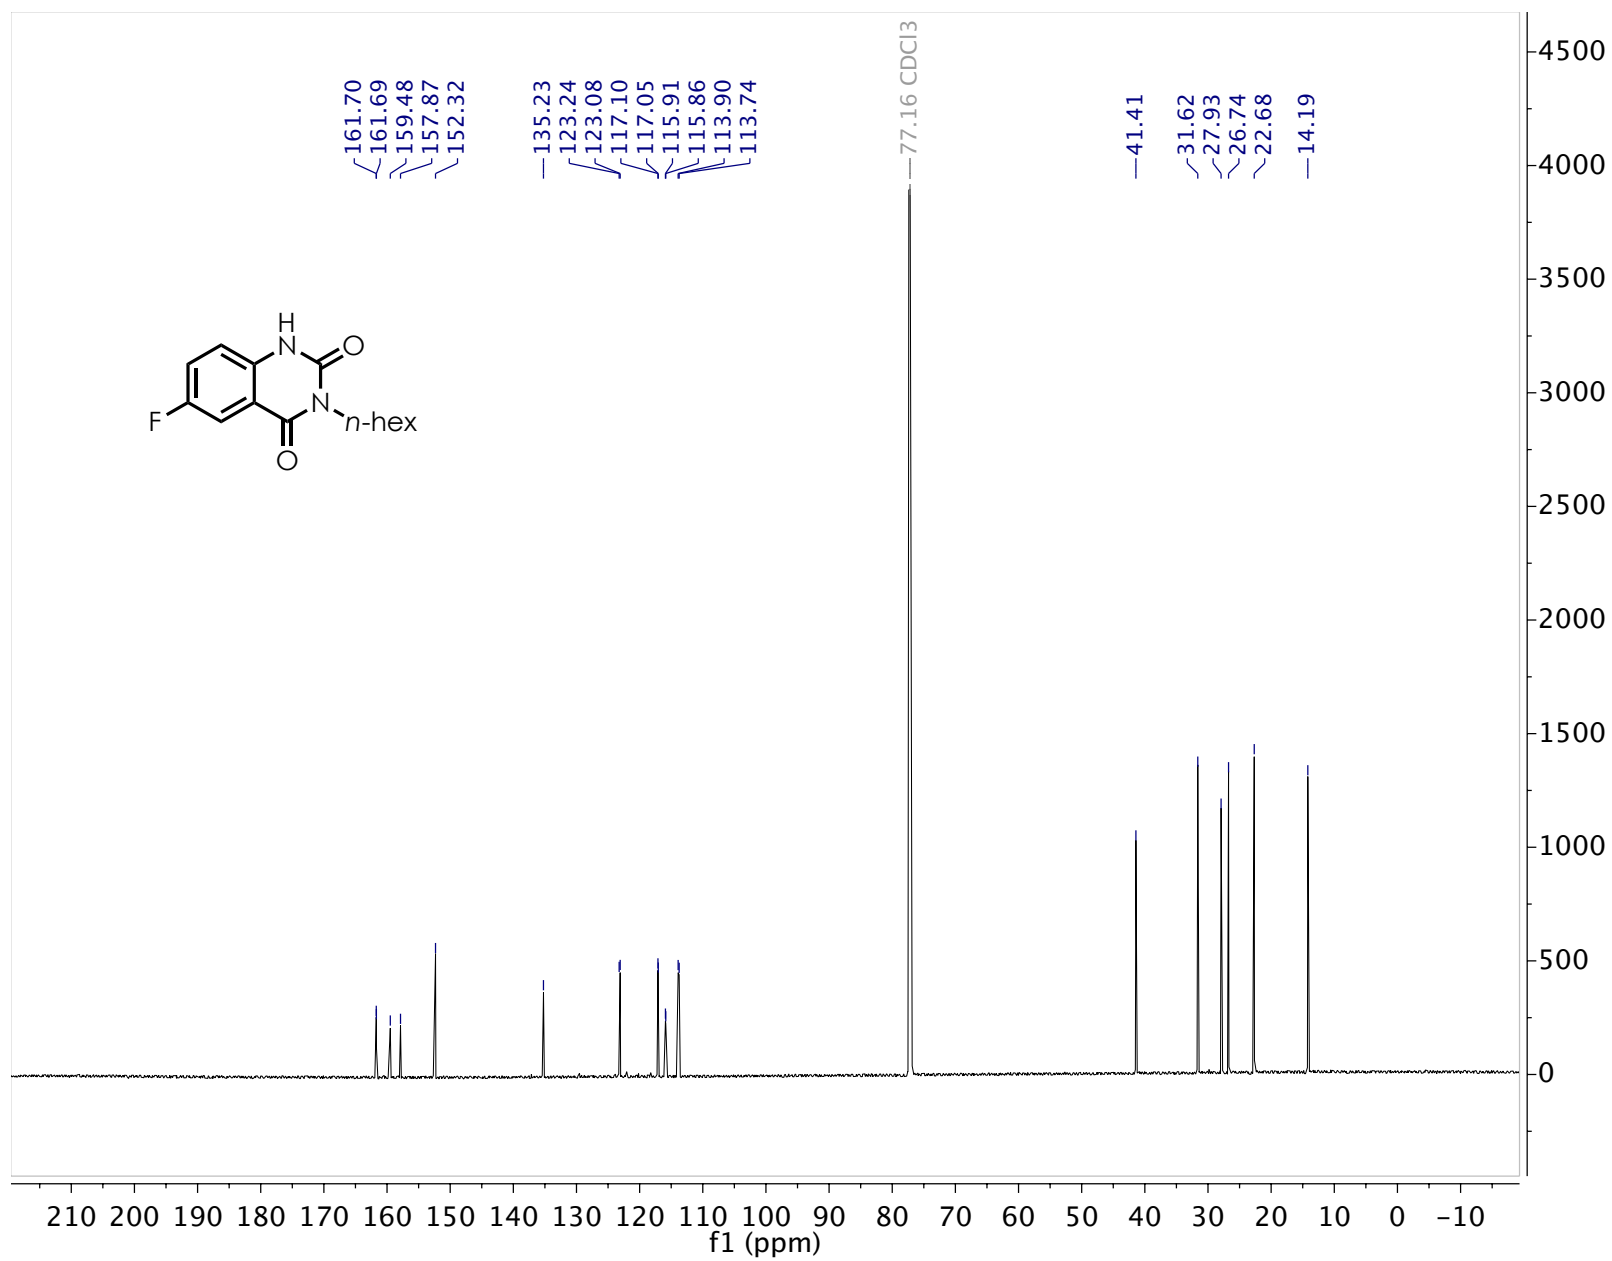

NT-04-250-19F 2.2.fid  
F19 CDCl3 {C:\data\ntay} nmrsu 1

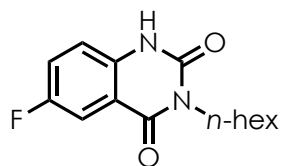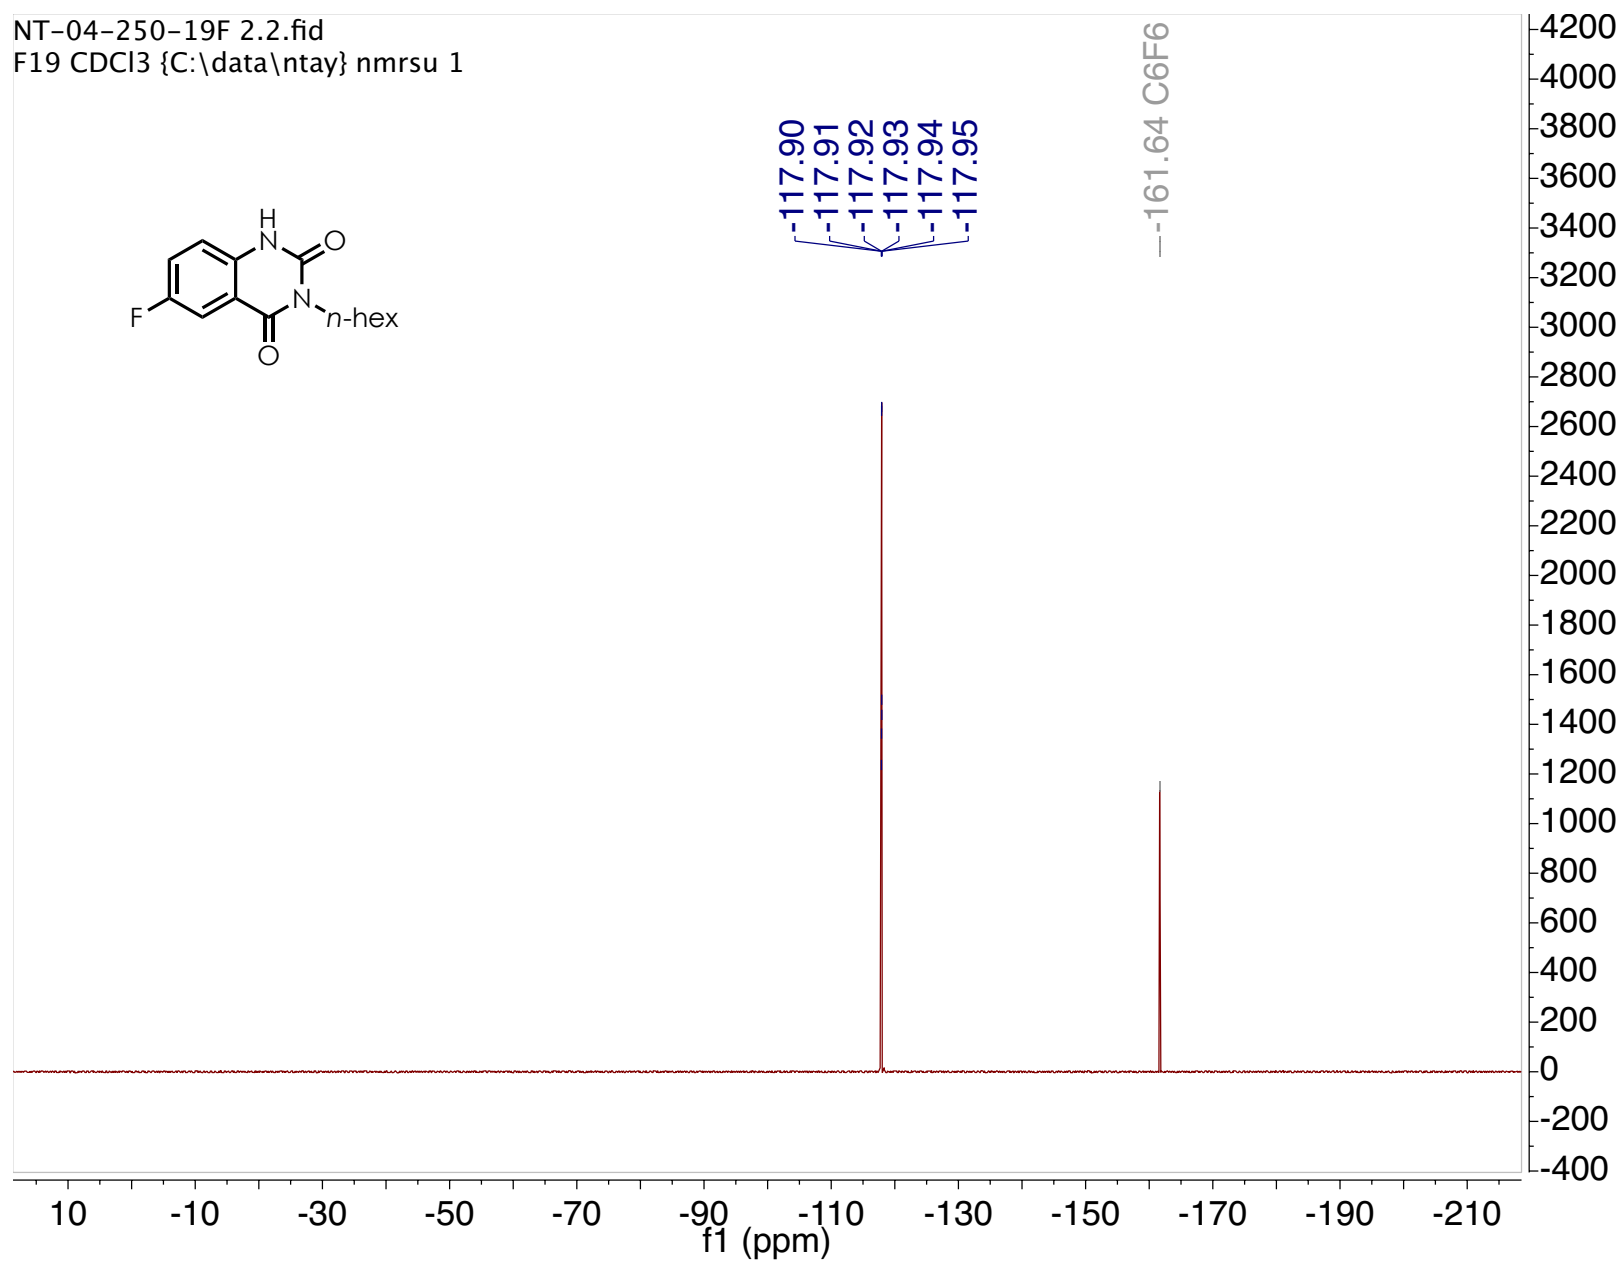

NT-04-253-1H.1.fid

NT-04-253-1H

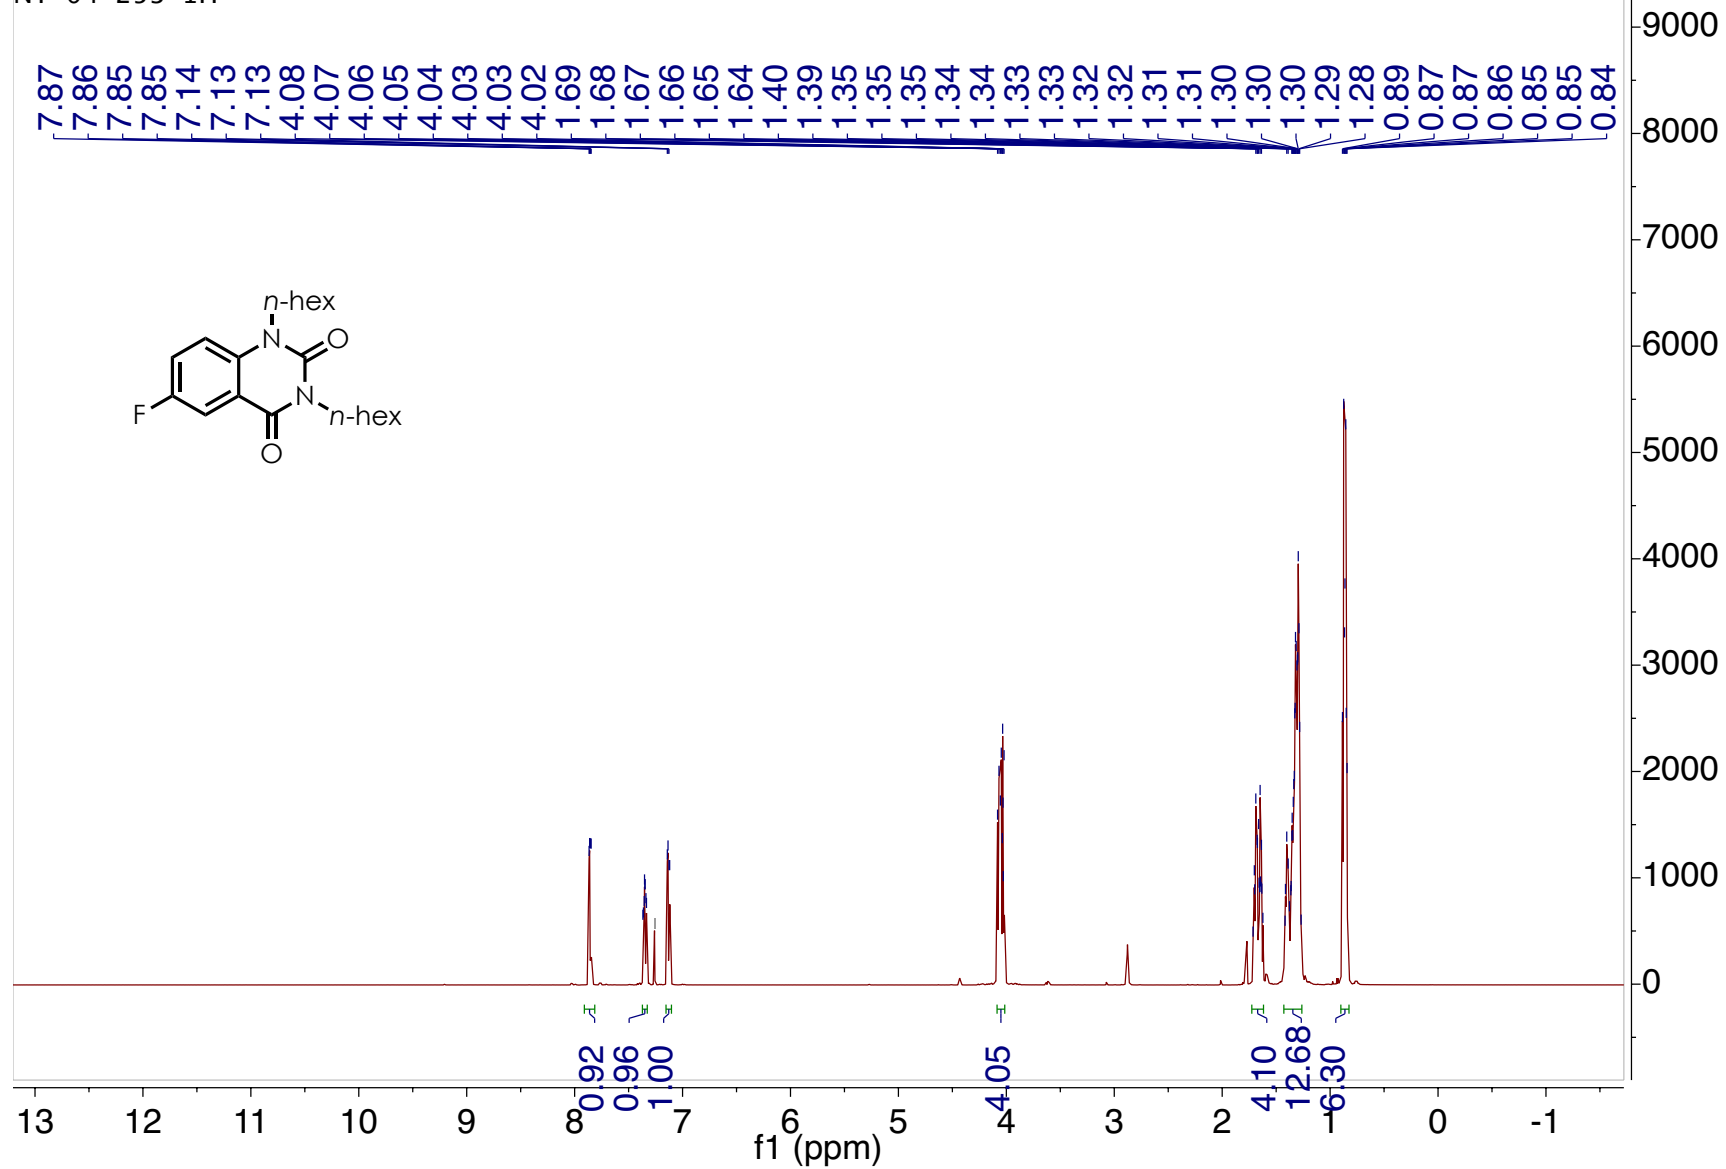

NT-04-253 13C.1.fid

Nicewicz

5106032

ntay

NT-04-253

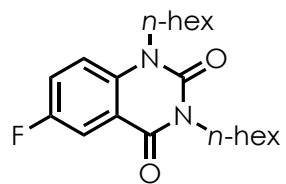

160.90  
160.89  
158.97  
157.35  
150.47  
136.35  
136.34  
122.71  
122.55  
117.17  
117.12  
115.53  
115.48  
114.68  
114.53

-77.16 CDCl<sub>3</sub>

44.15  
42.24  
31.58  
31.54  
27.81  
27.35  
26.73  
26.54  
22.65  
22.64  
14.11  
14.06

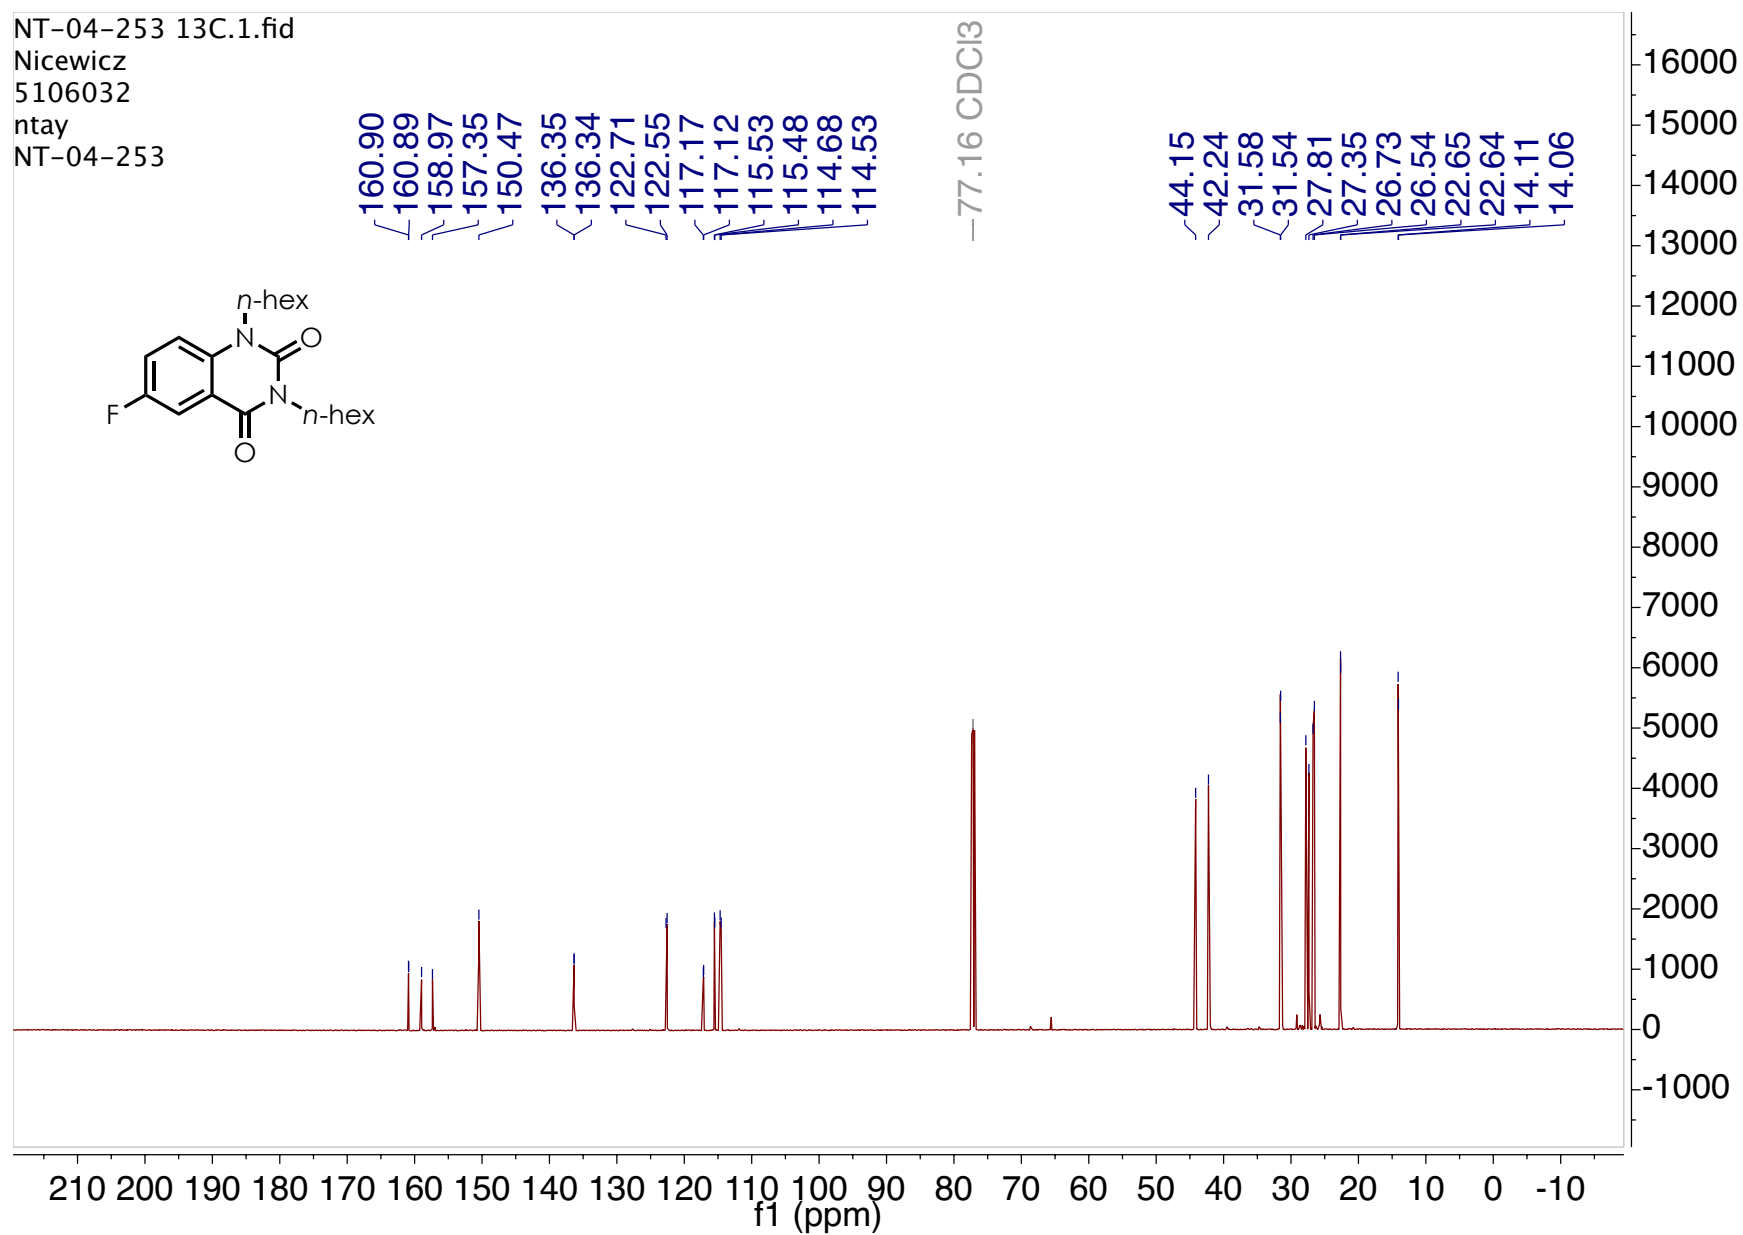

NT-04-253-19F 2.2.fid  
F19 CDCl3 {C:\data\ntay} nmrsu 6

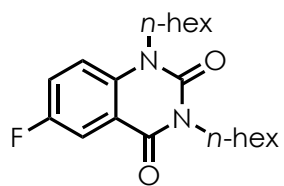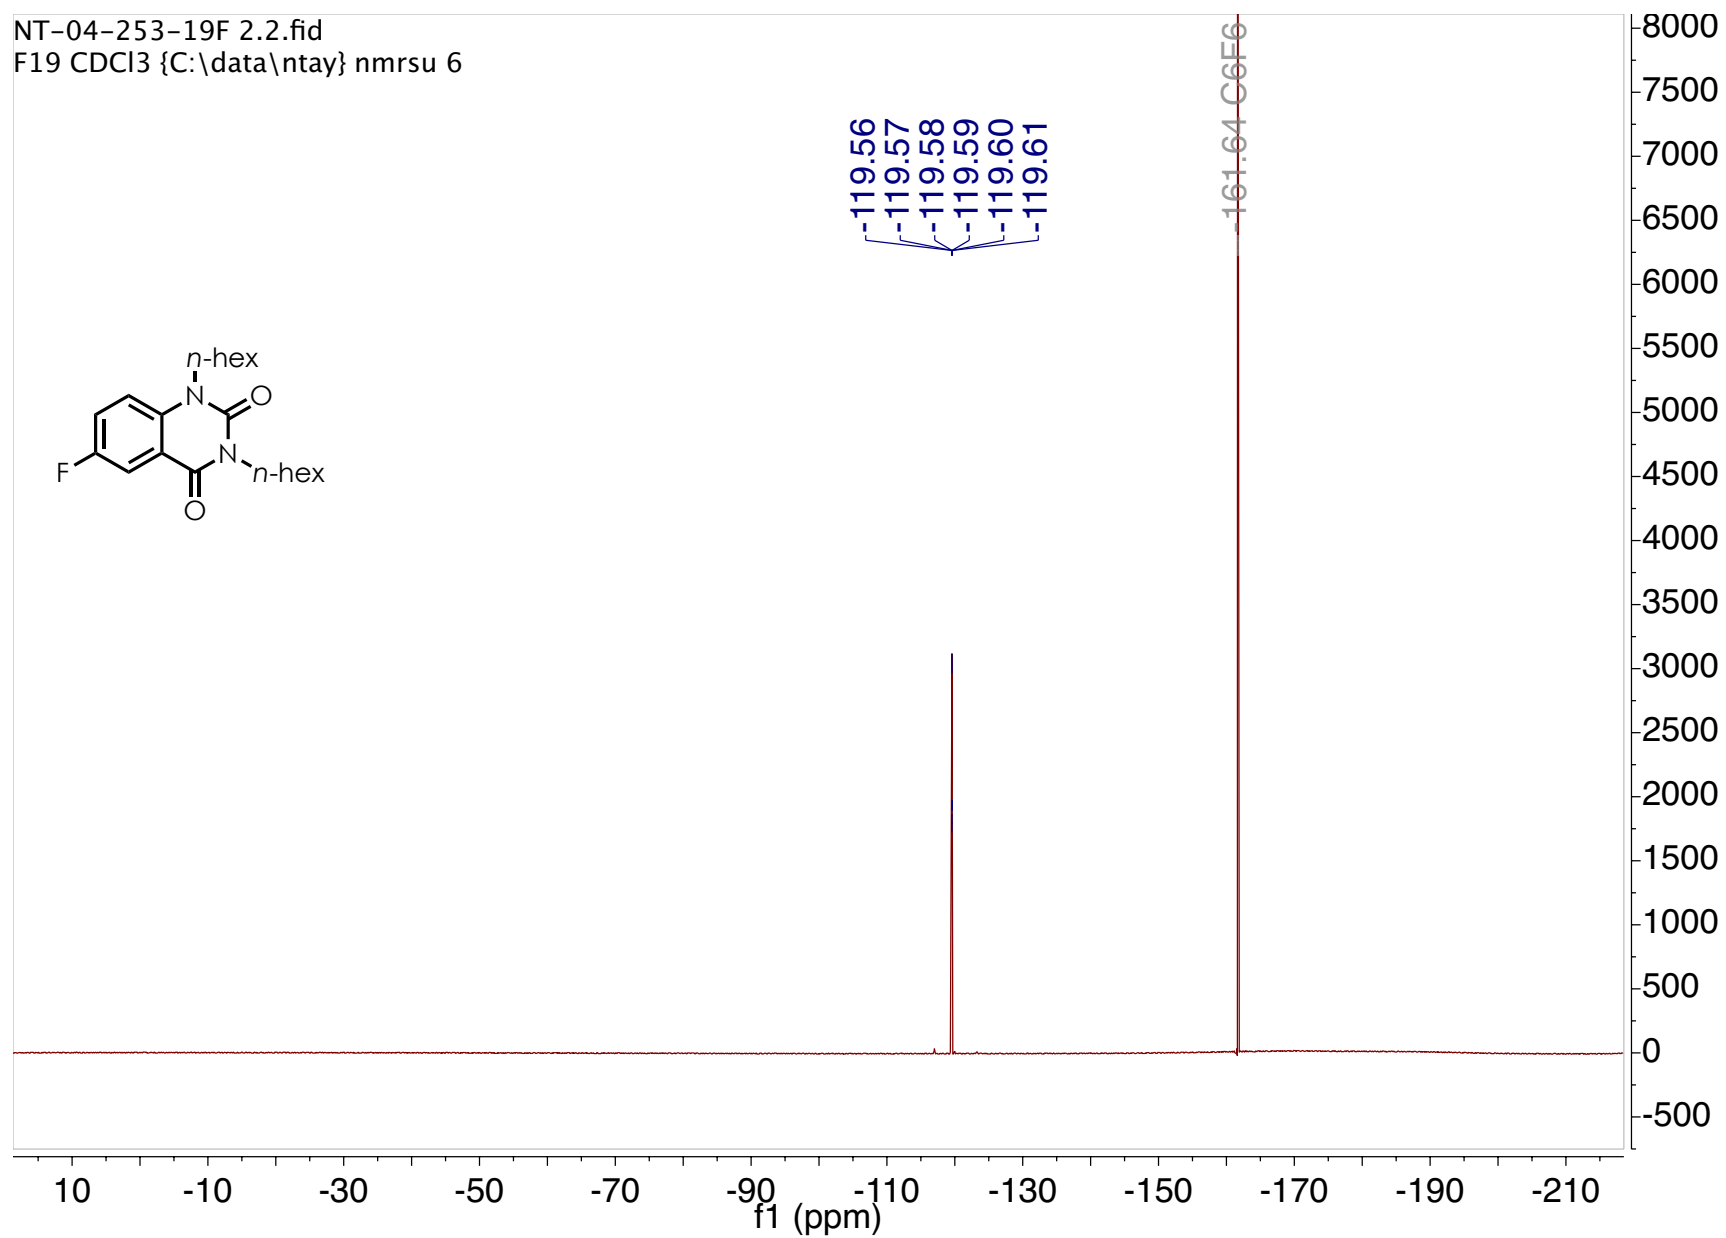

NT-06-165.1.fid  
Nicewicz  
5106082  
ntay  
NT-06-165

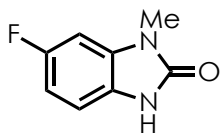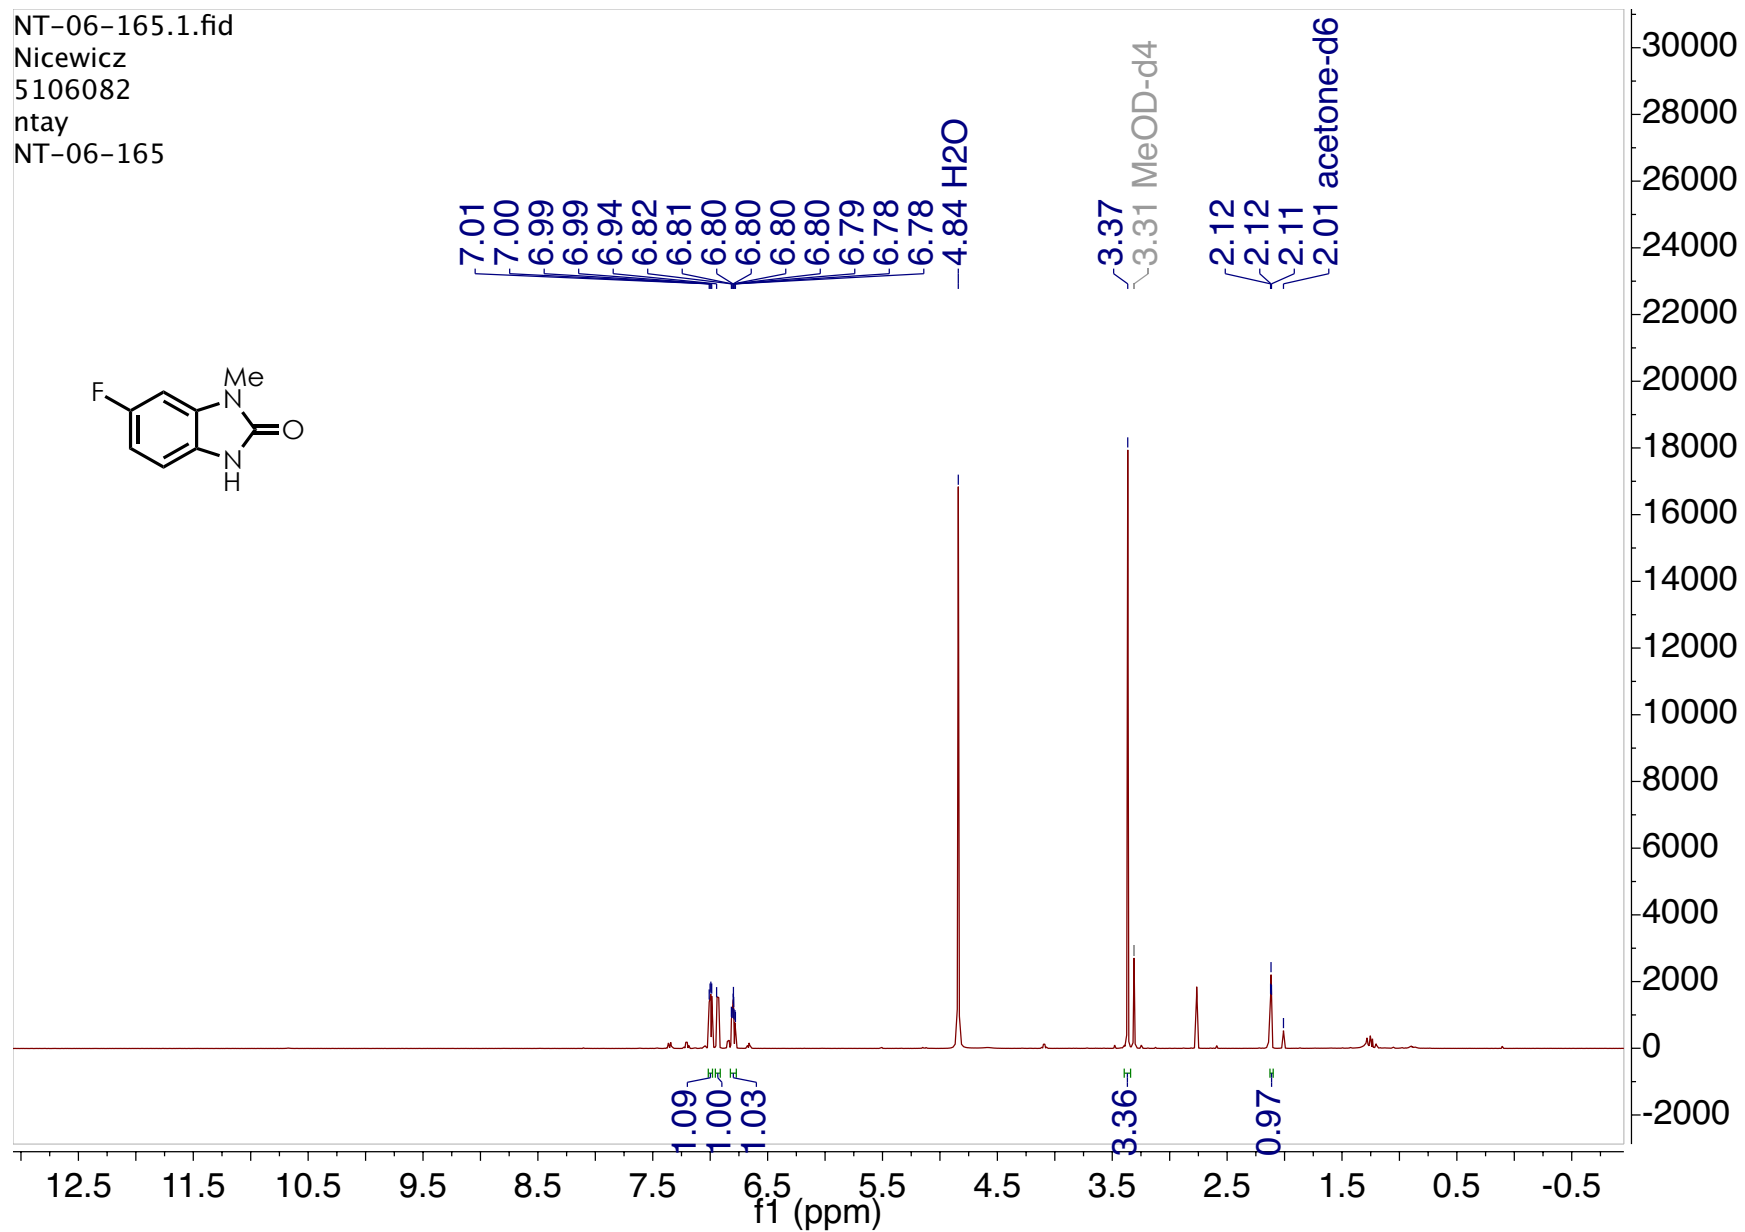

NT-06-165 2.2.fid  
Nicewicz  
5106082  
ntay  
NT-06-165

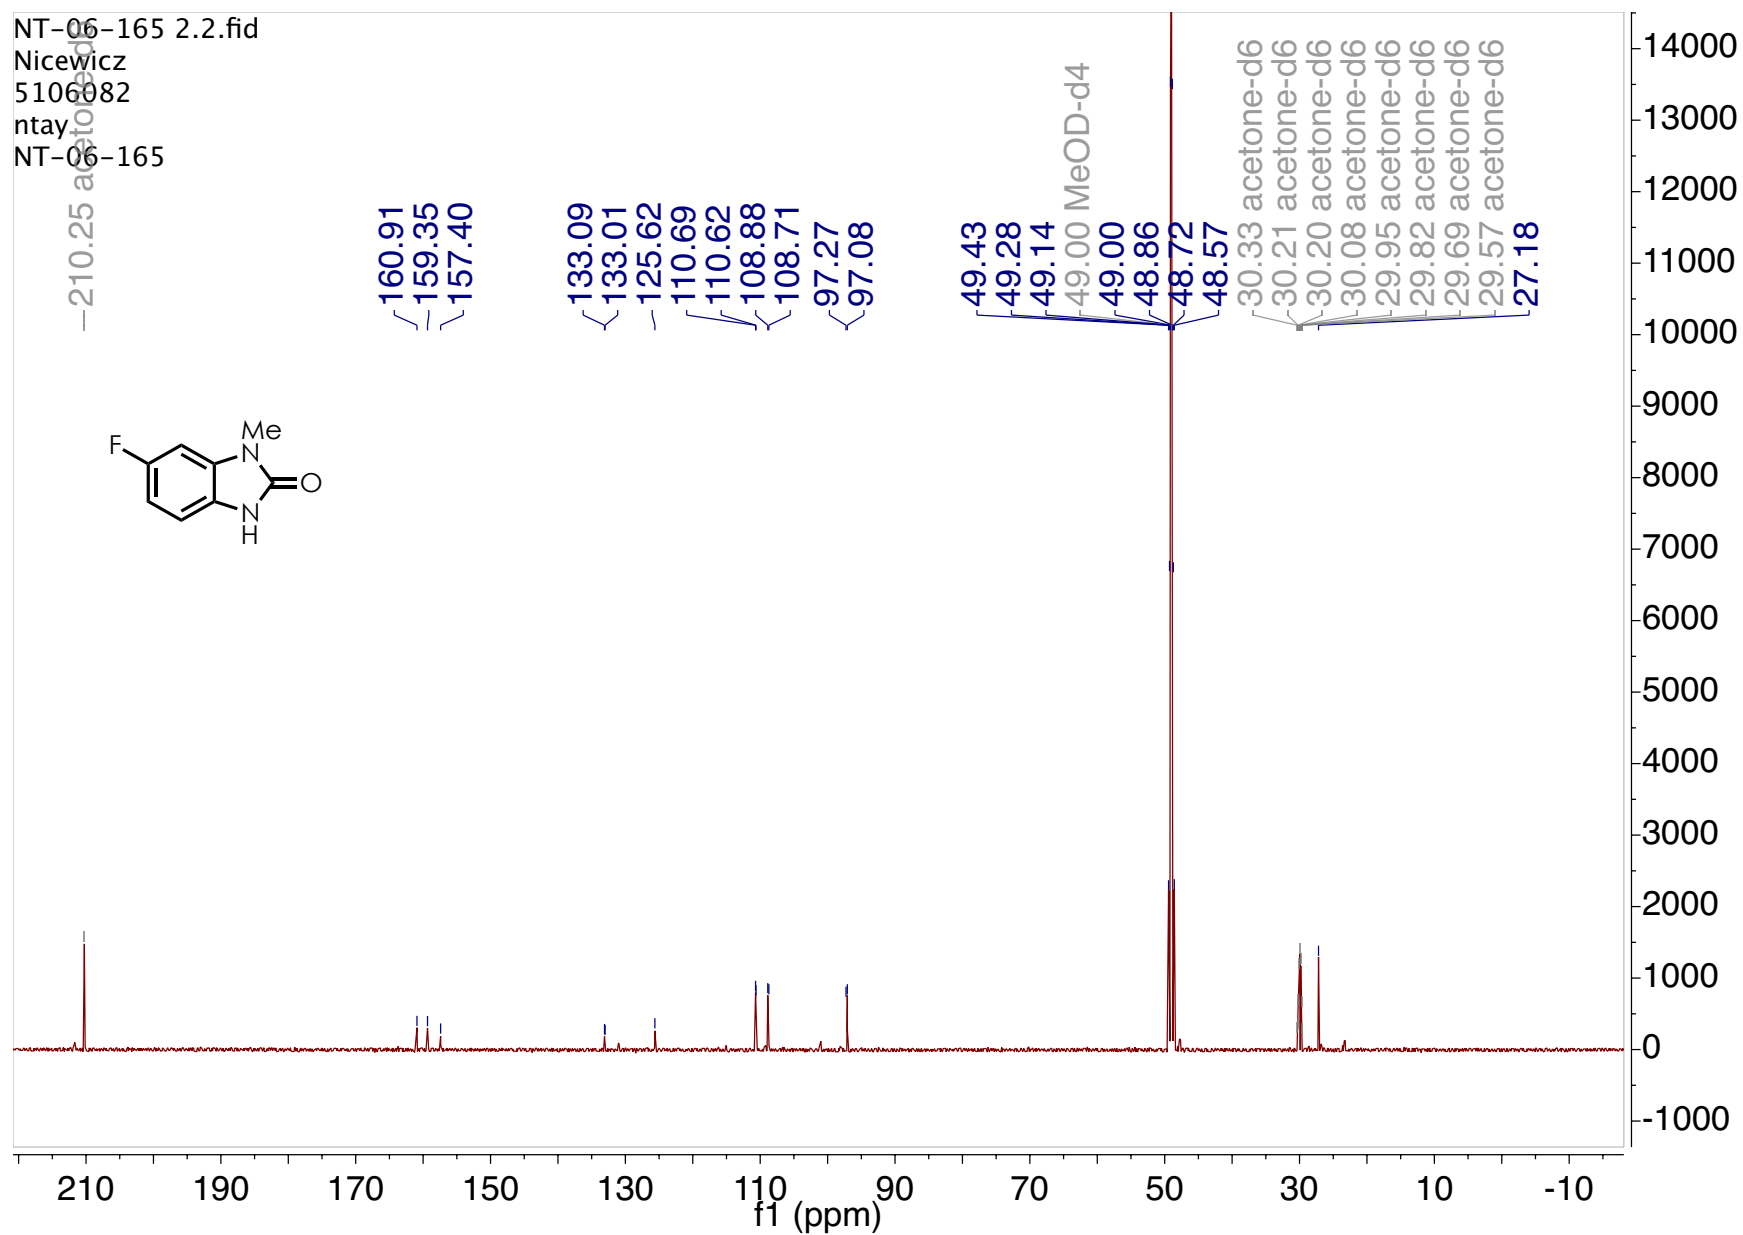

NT-06-165 4.1.fid  
F19 CDCl3 {C:\data\ntay} nmrsu 44

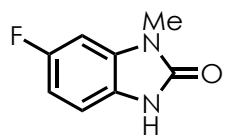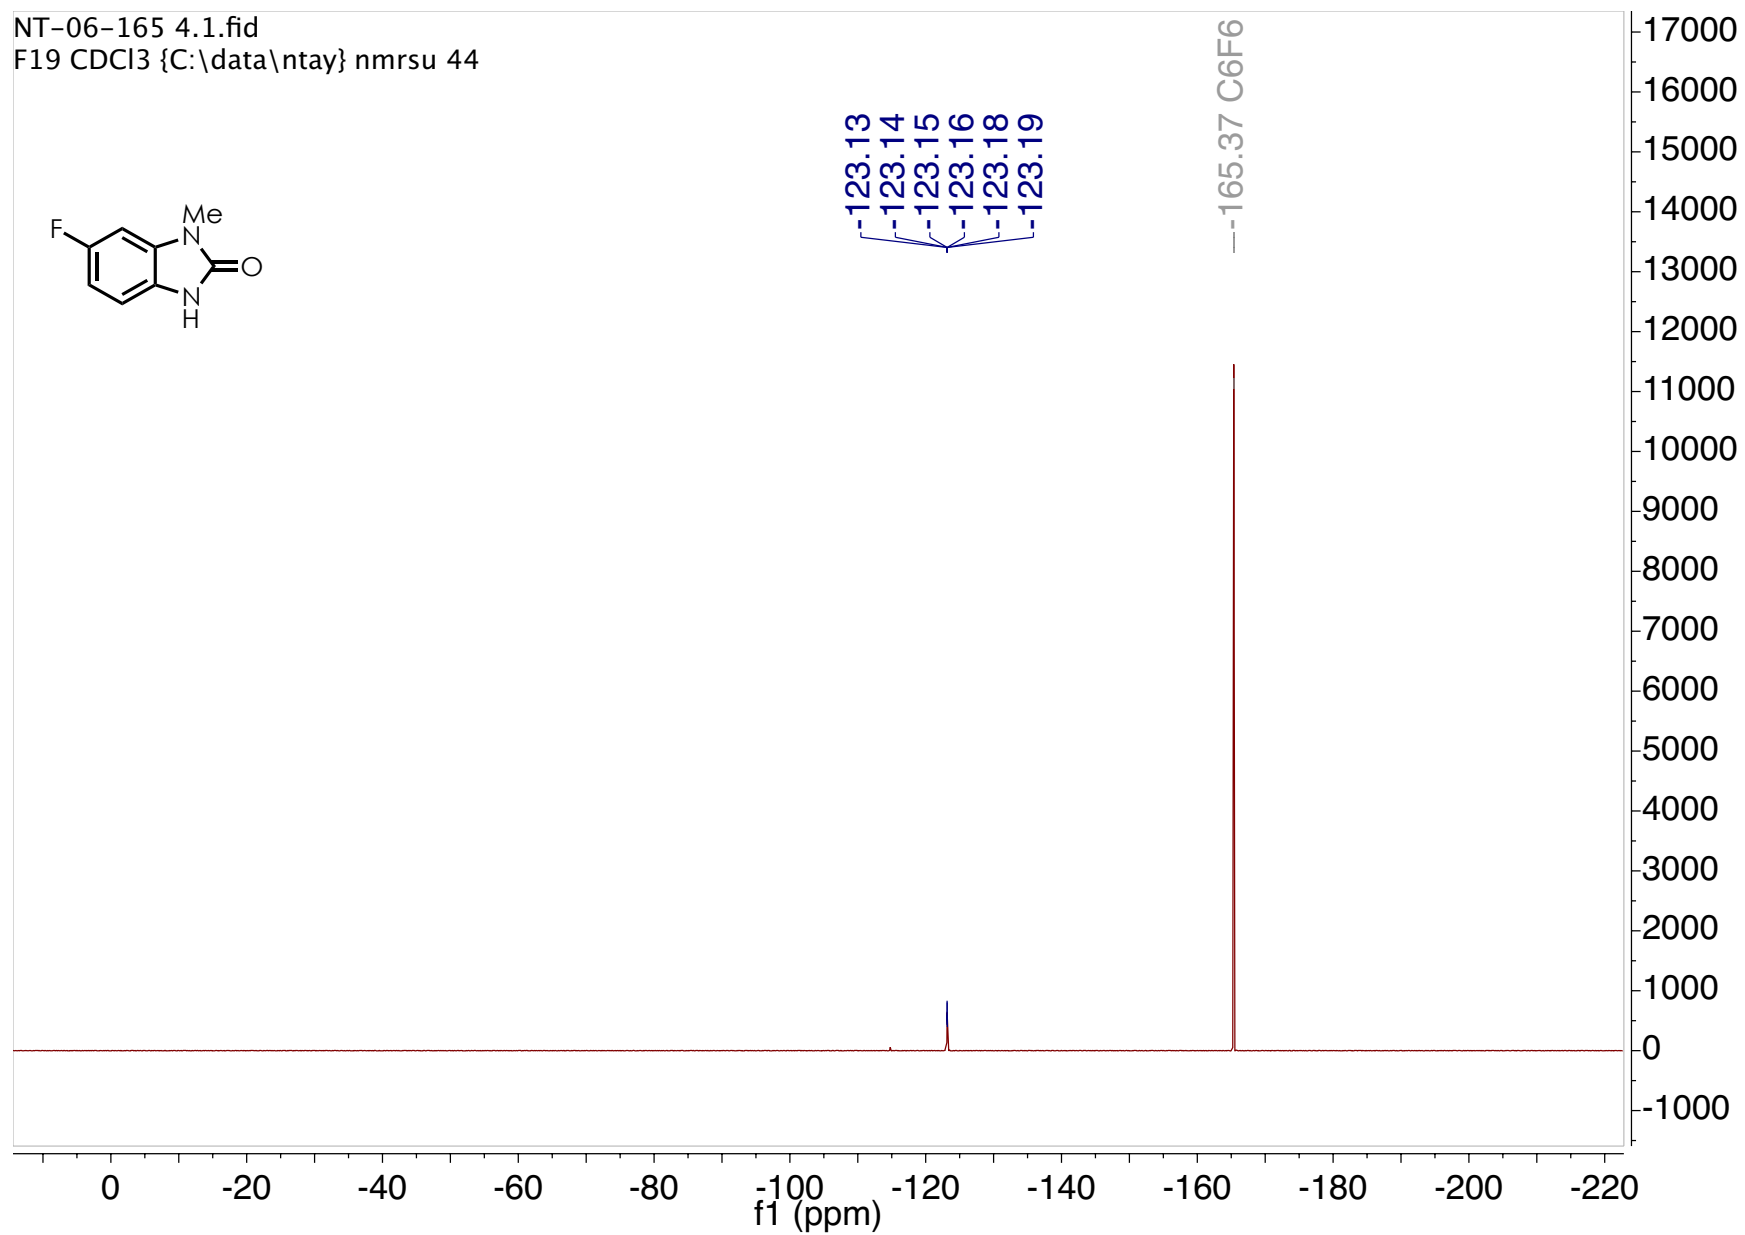

NT-06-178.1.fid  
6-178 1H 1D

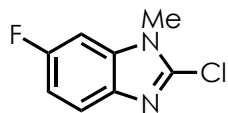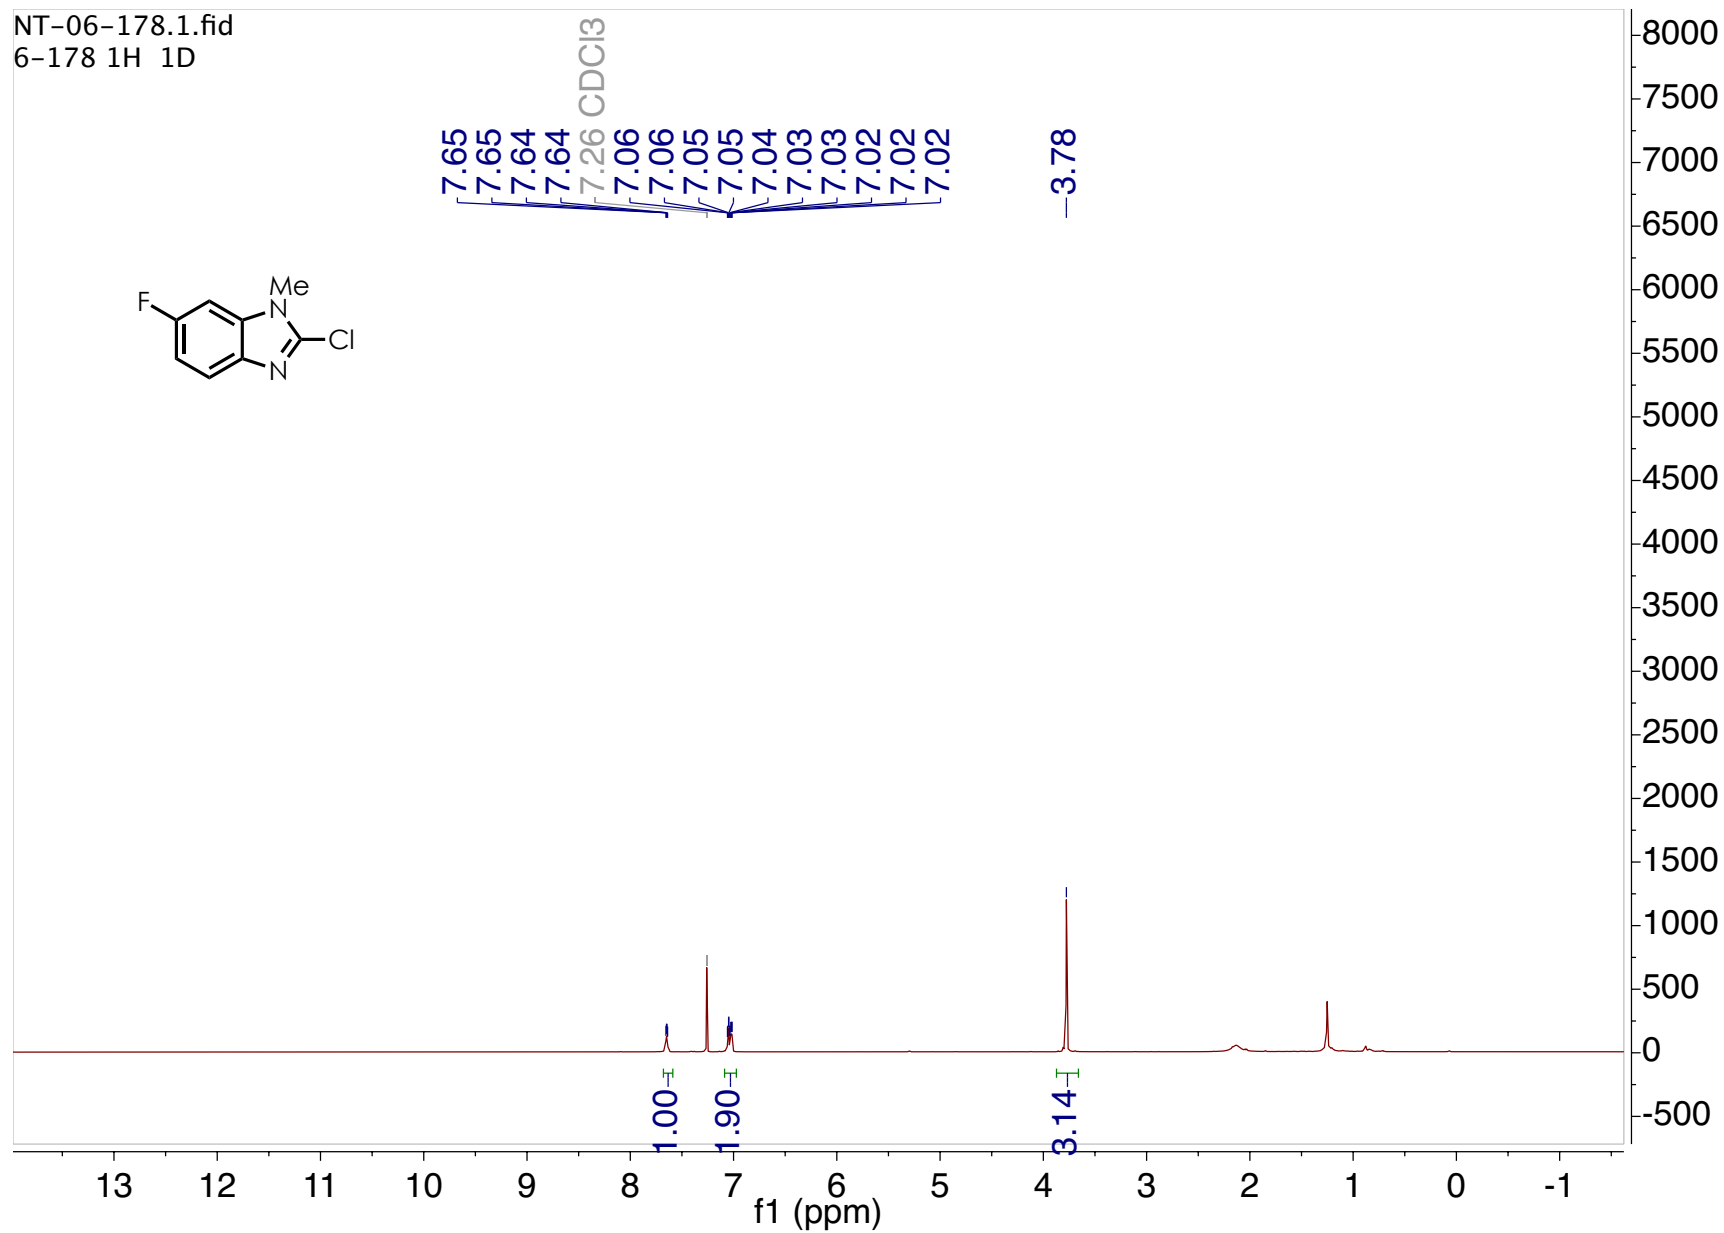

NT-06-178.2.fid  
6-178 13C{1H} 1D

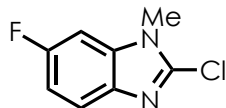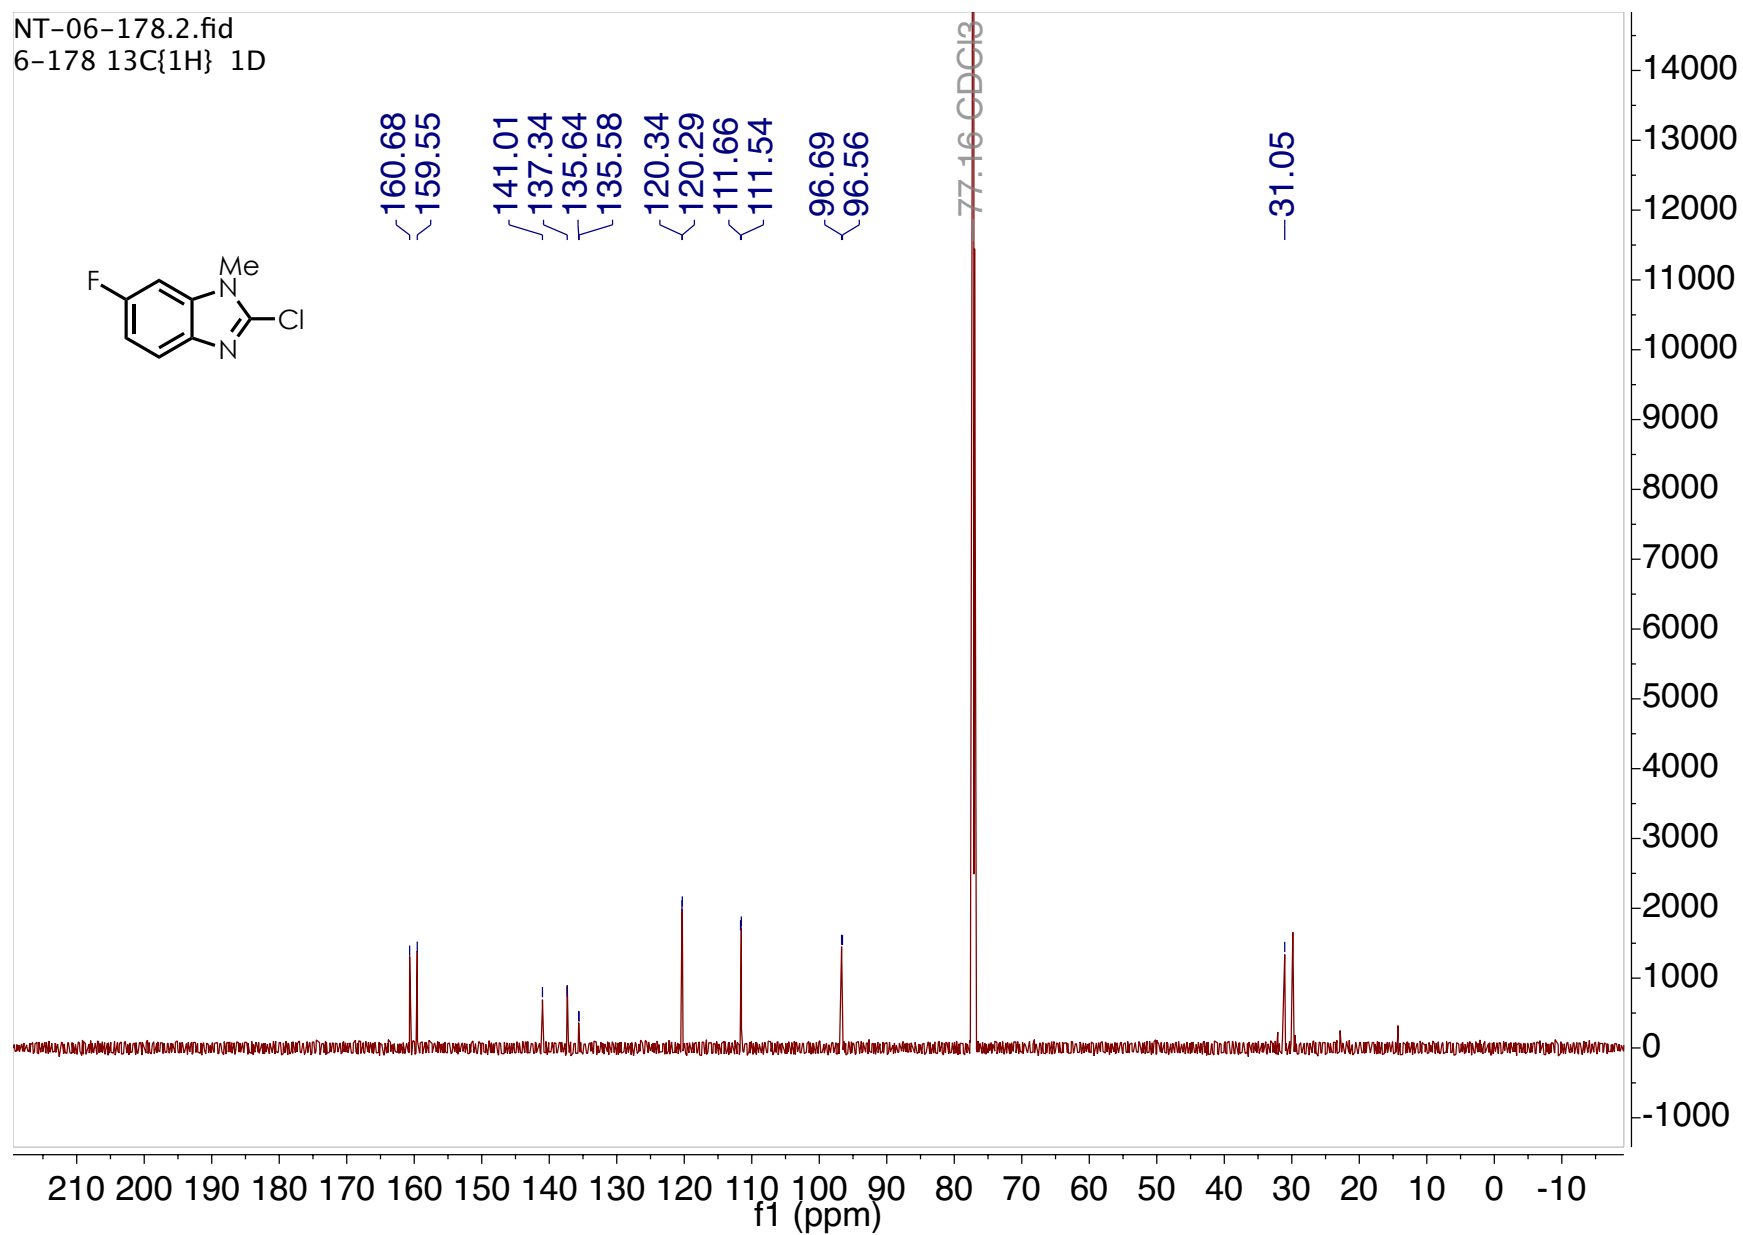

NT-06-178-19F.1.fid  
F19 CDCl3 {C:\data\ntay} nmrsu 59

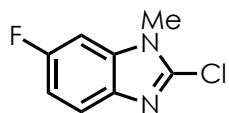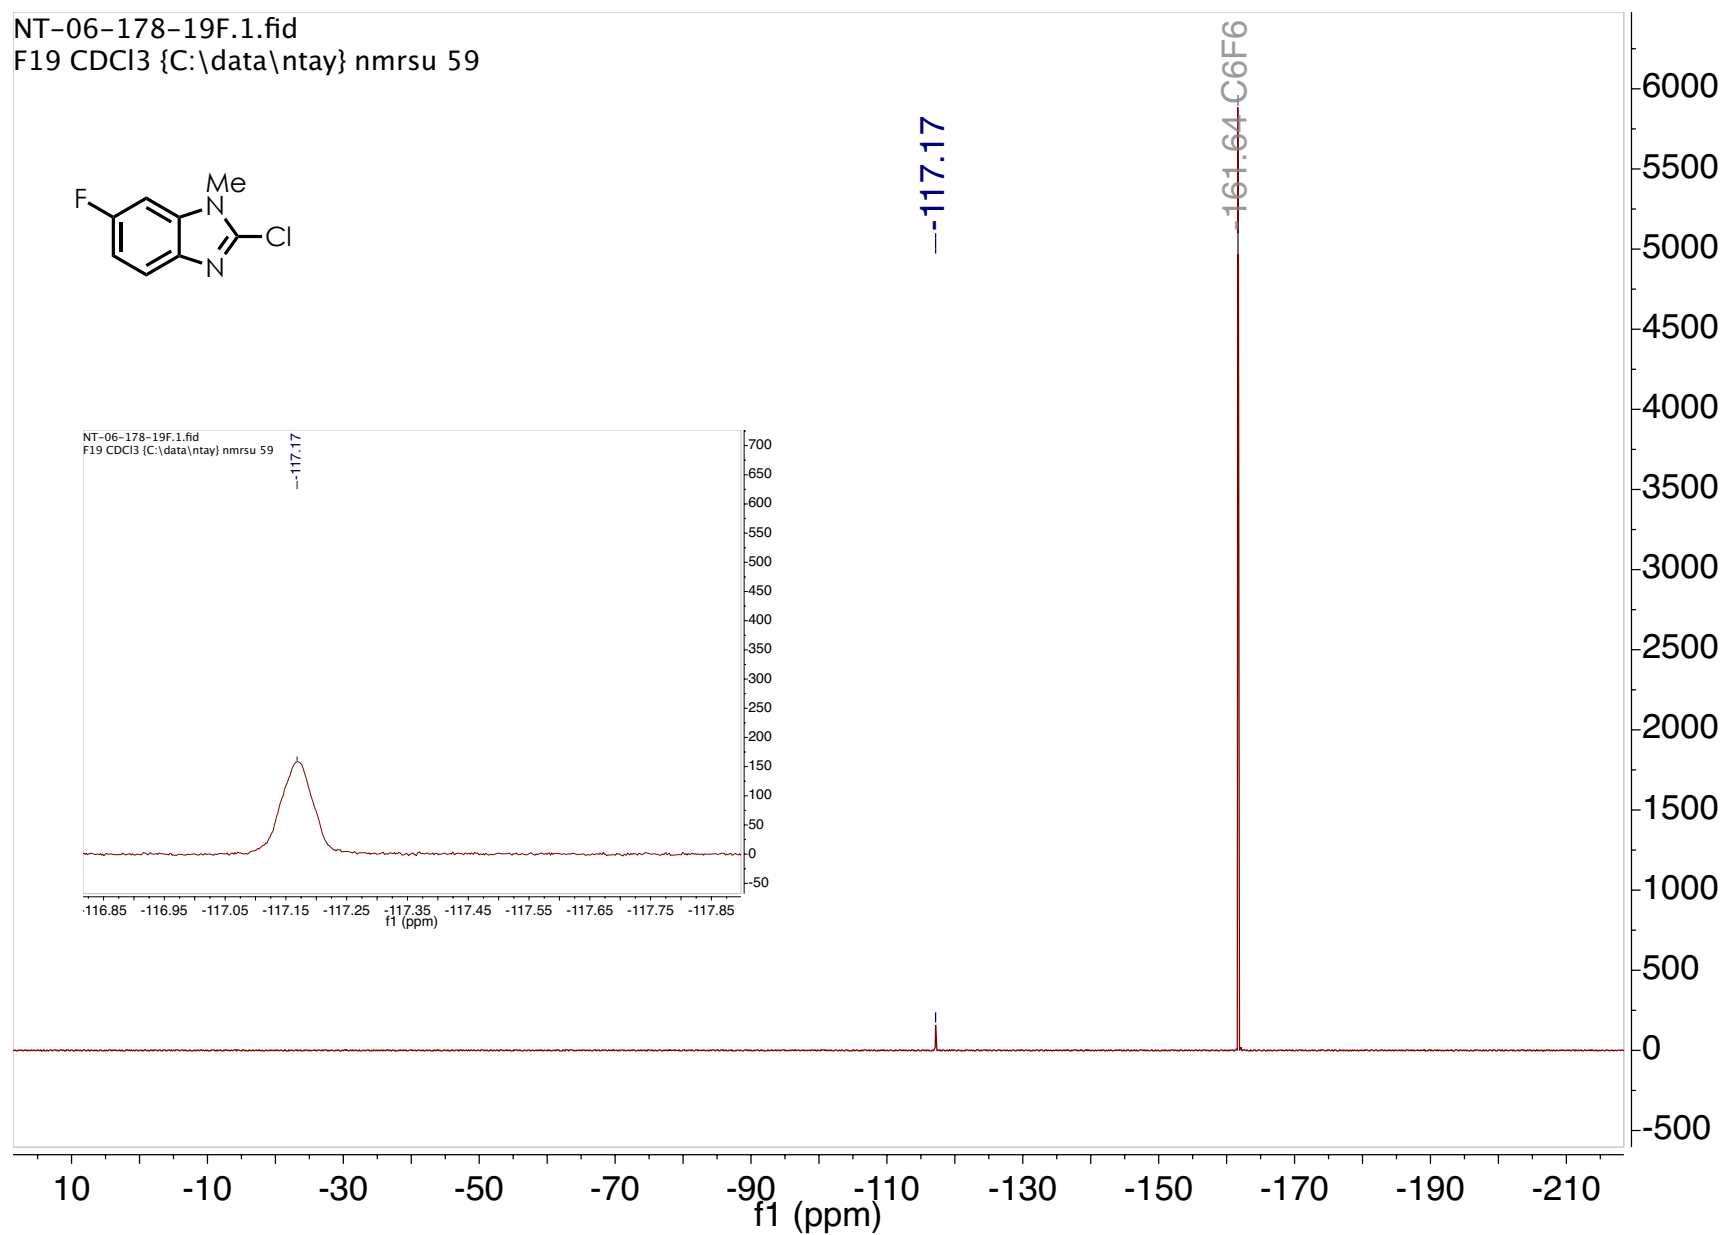

NT-04-249-1H.1.fid  
NT-04-249-1H

7.292  
7.279  
7.265  
7.055  
7.051  
7.041  
7.039  
7.036  
7.026  
7.022  
6.999  
6.995  
6.992  
6.988  
6.984  
6.980  
6.977  
6.955  
6.951  
6.947  
6.870  
6.865  
6.856  
6.852

- 3.621
- 3.609
- 3.597
- 3.585

~~1.454~~  
~~1.442~~  
1.409

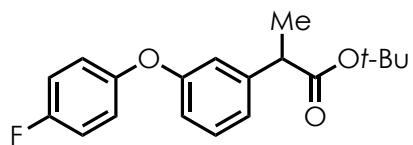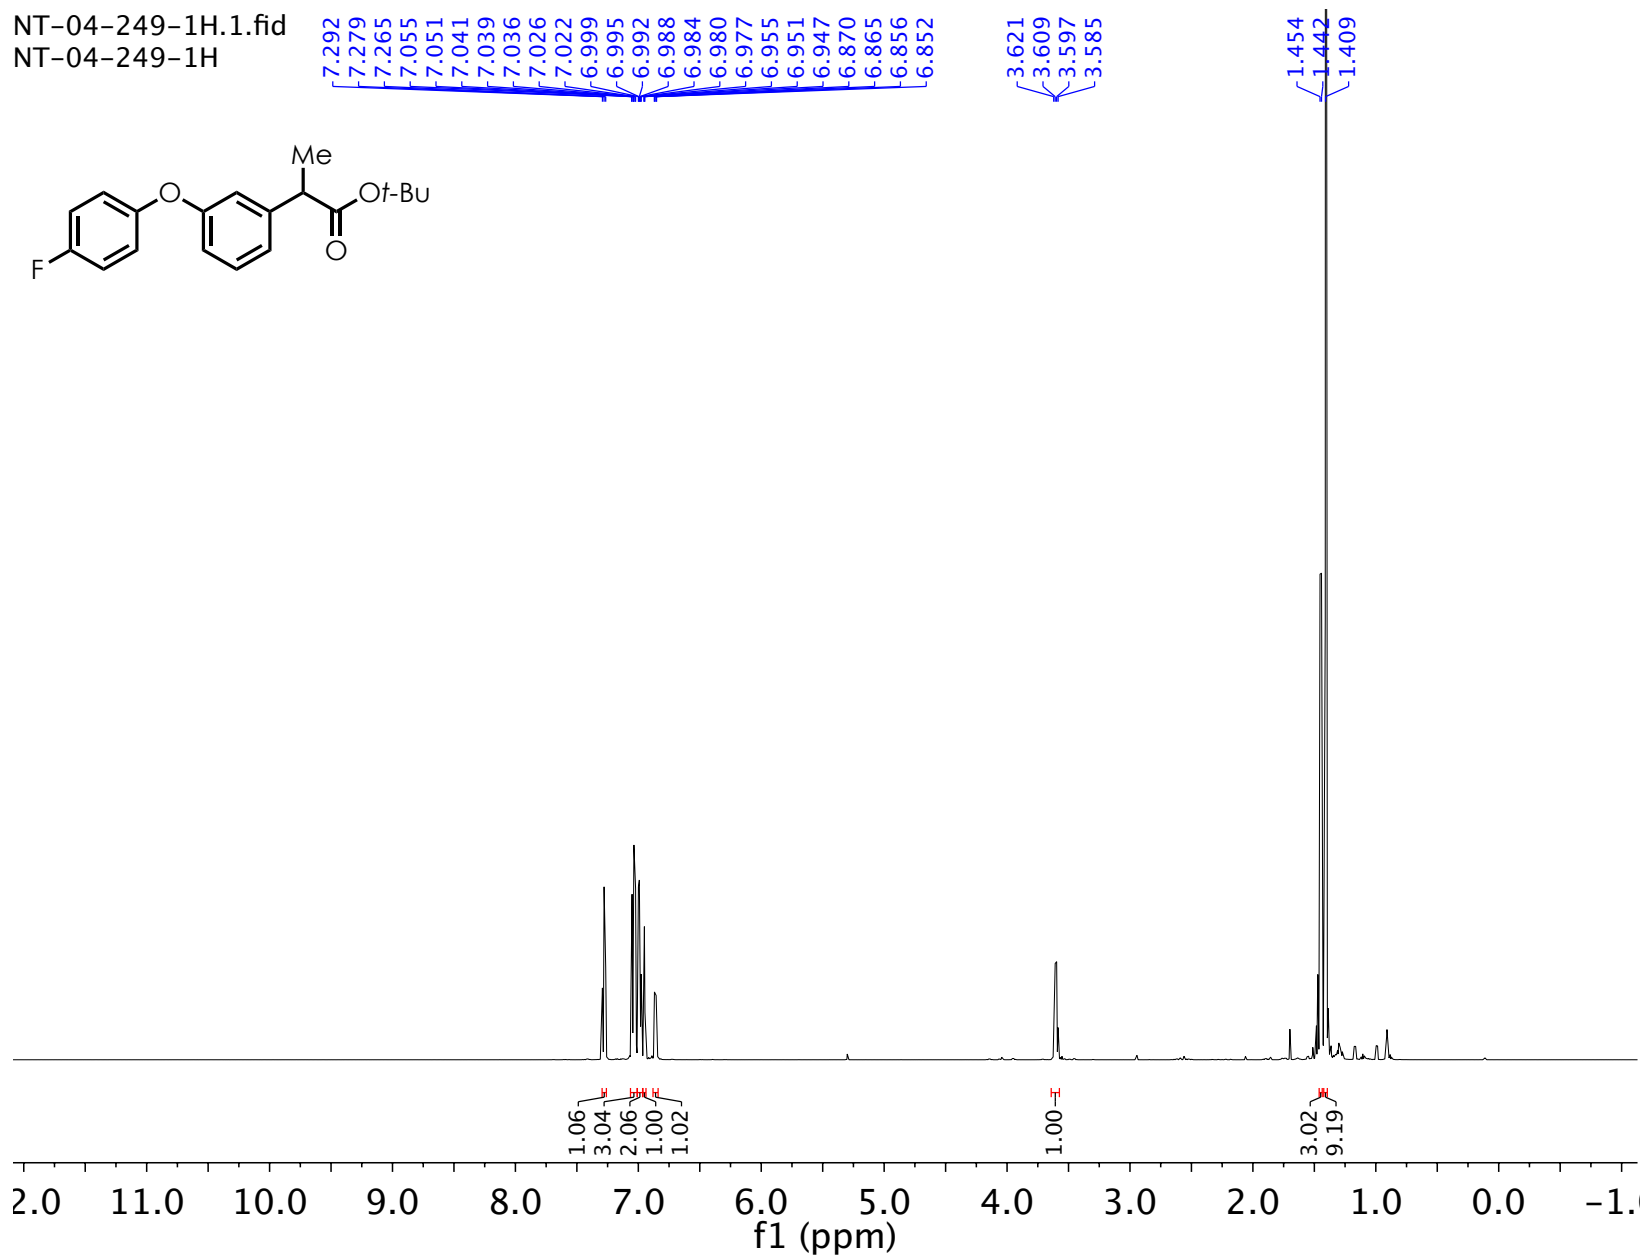

NT-04-249-13C.1.fid  
NT-04-249-13C

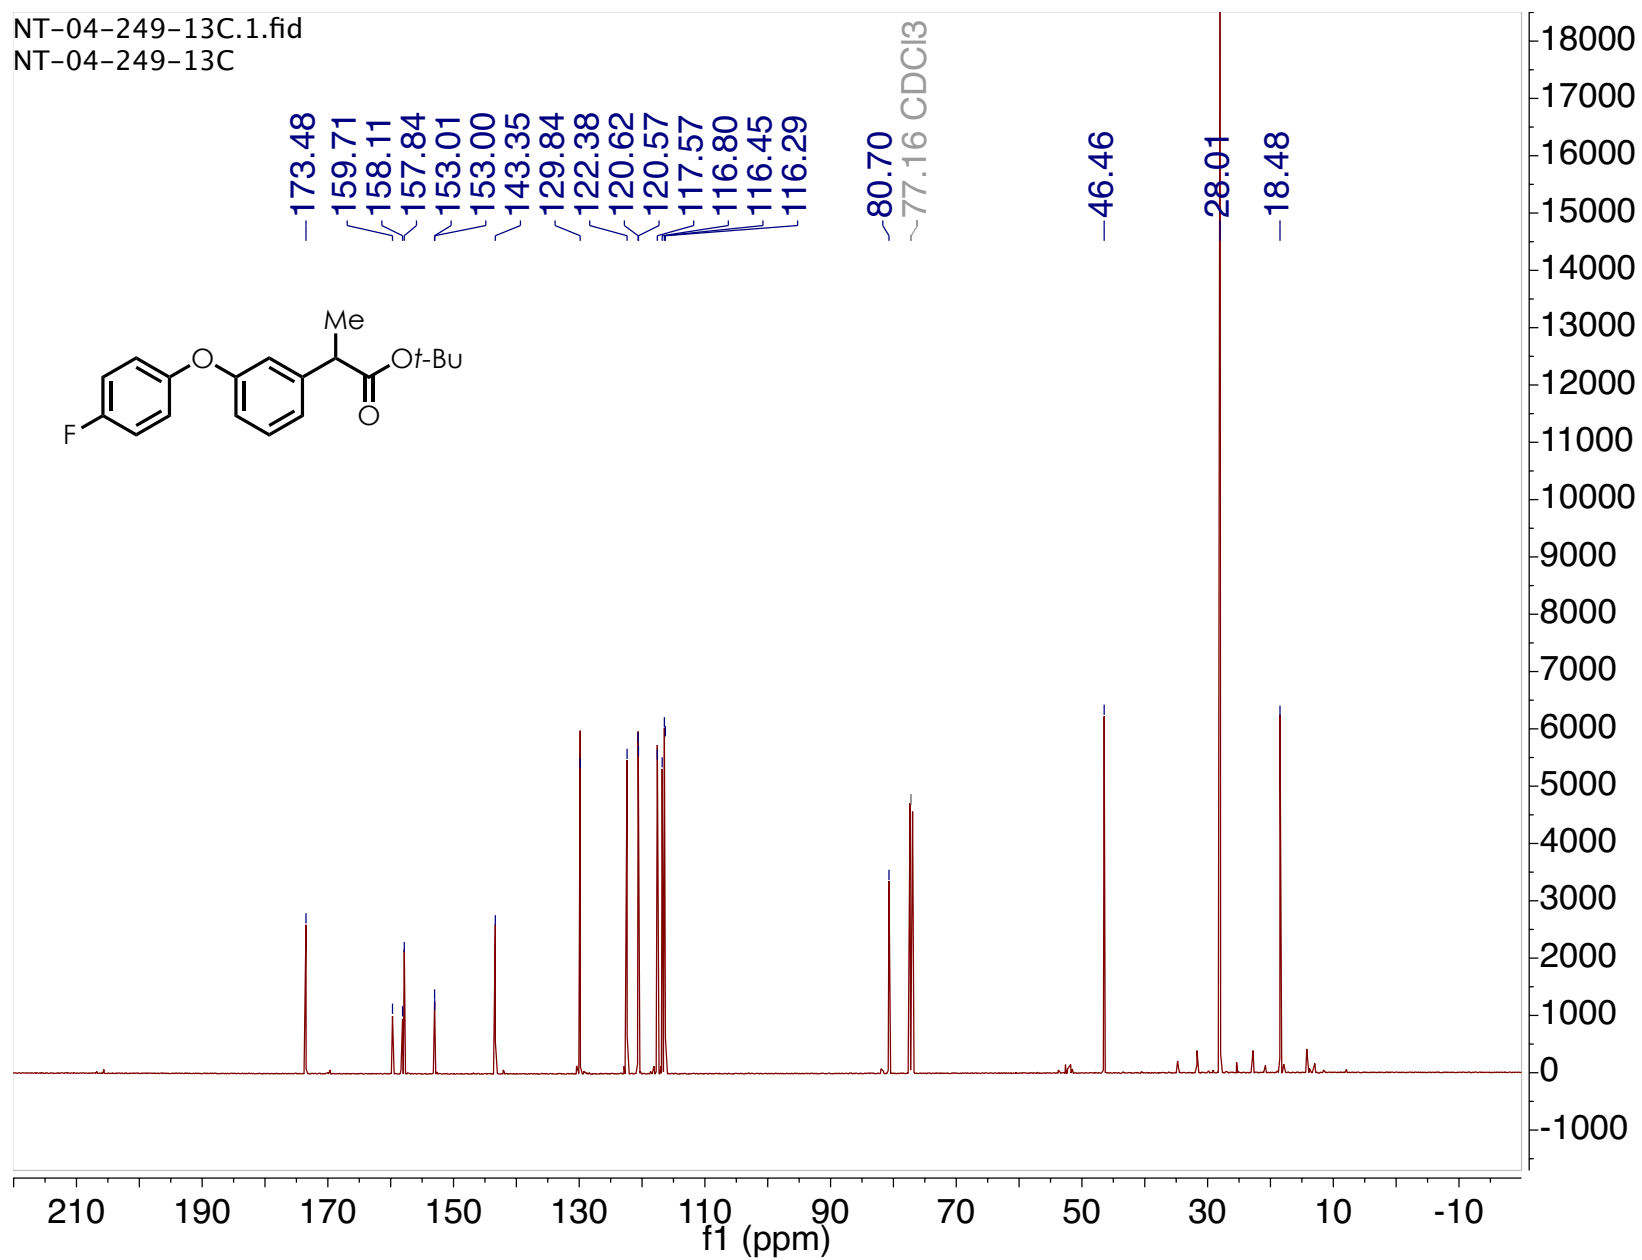

NT-04-249-19F.1.fid  
F19 CDCl3 {C:\data\ntay} nmrsu 7

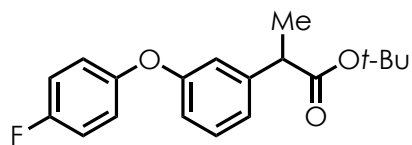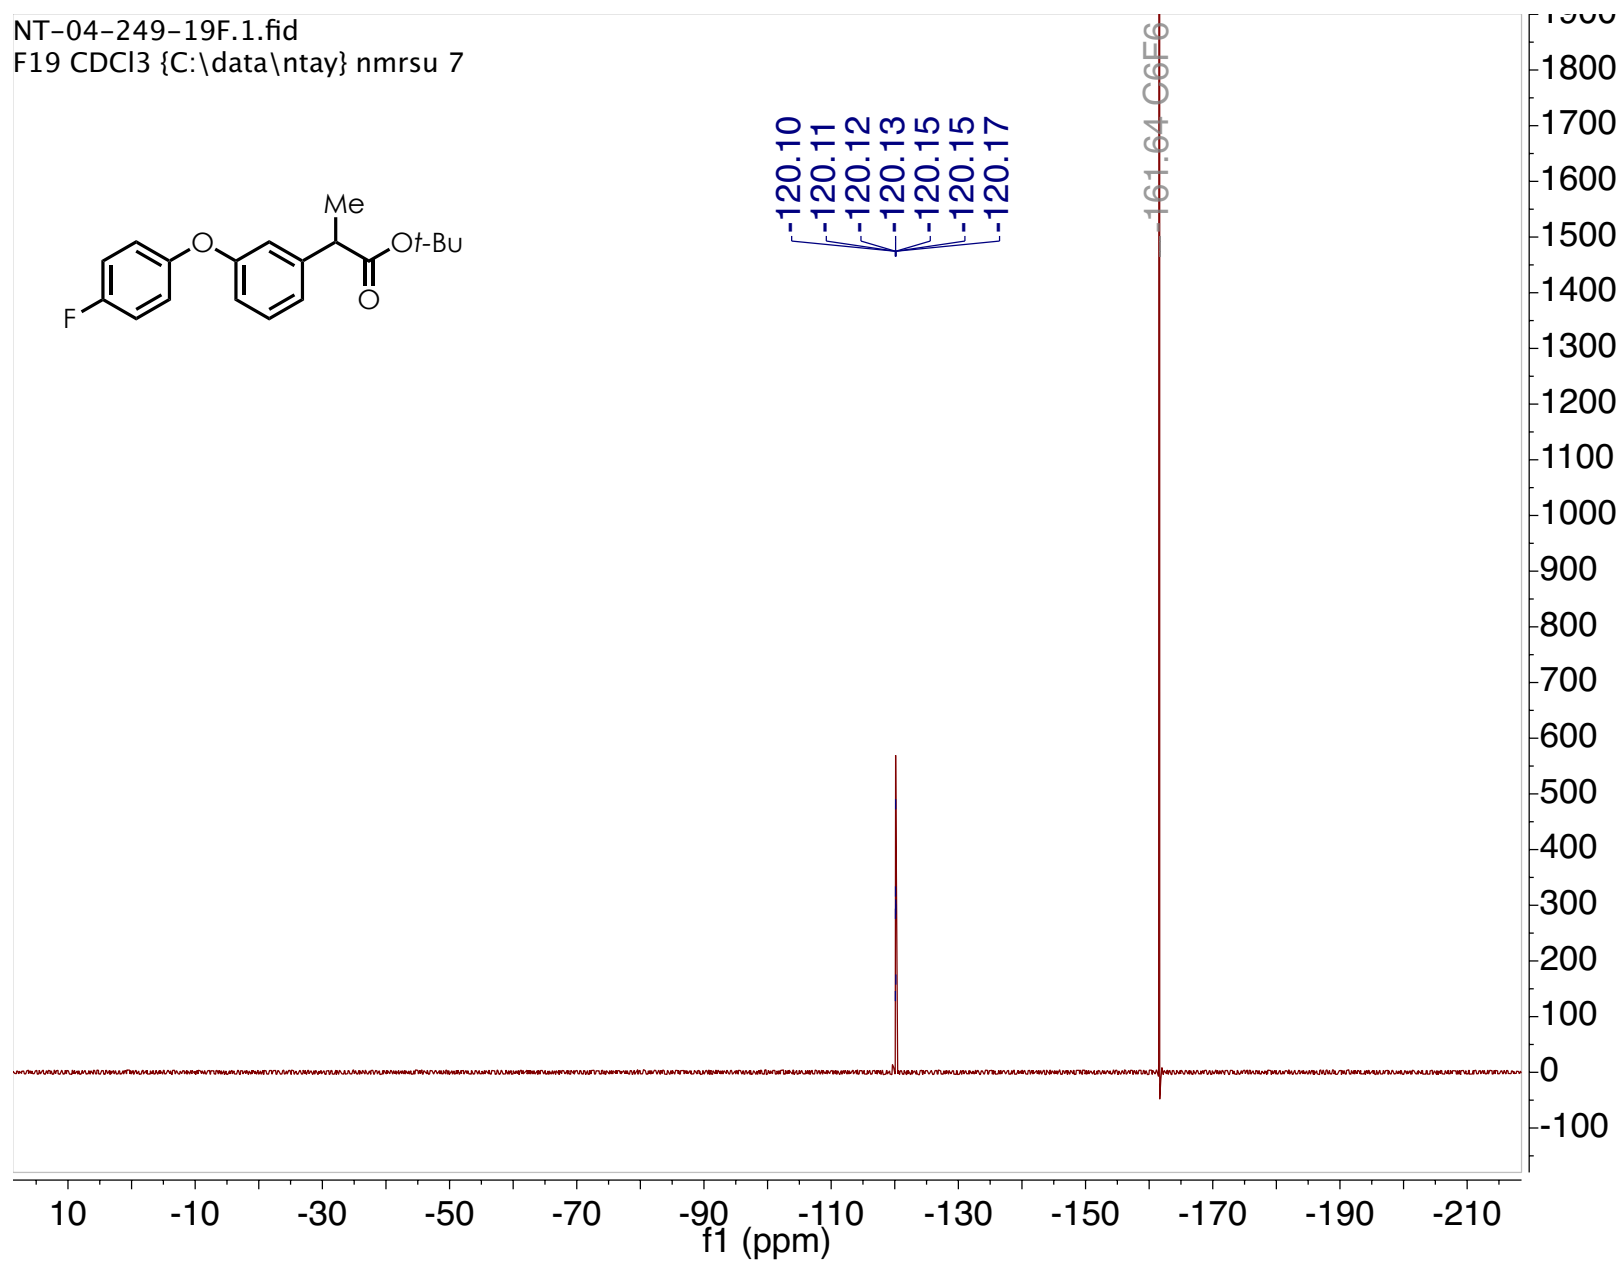

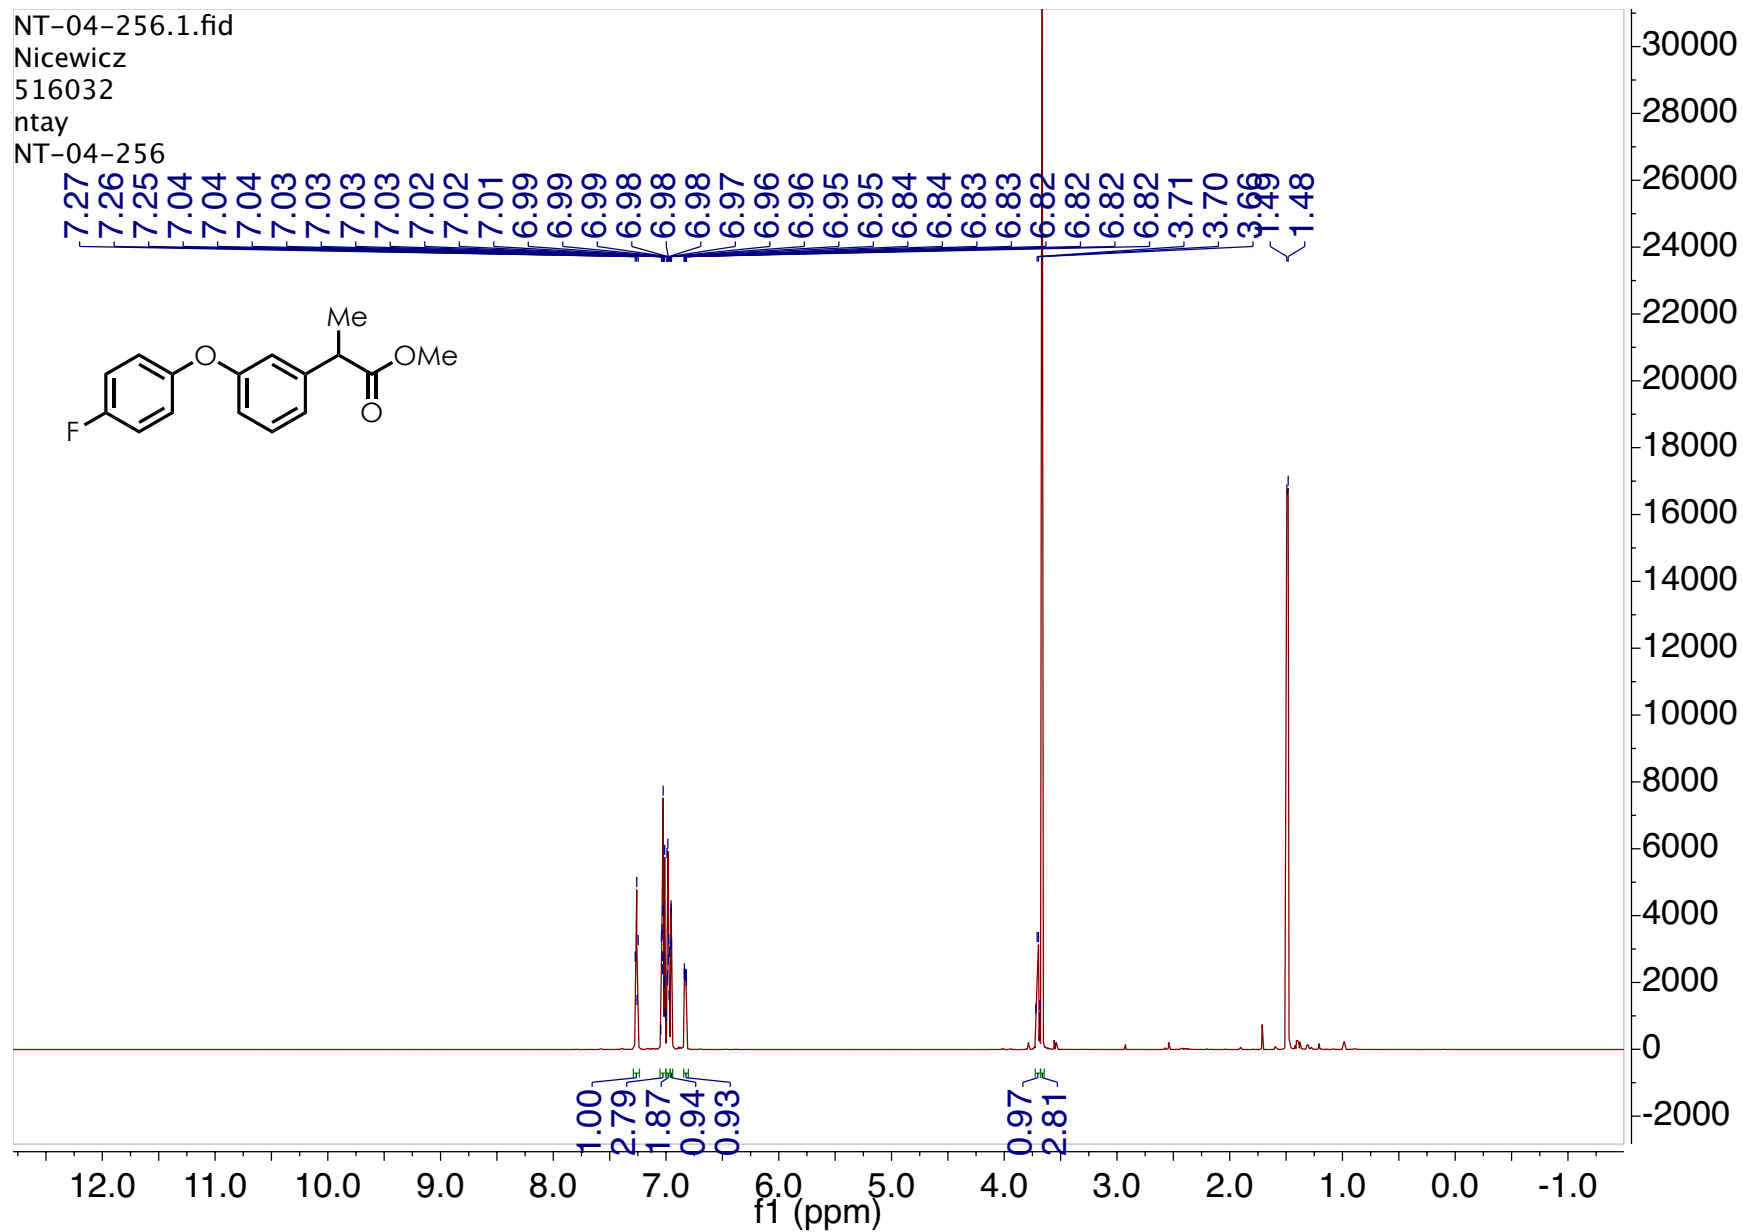

NT-04-256 2.2.fid  
Nicewicz  
516032  
ntay  
NT-04-256

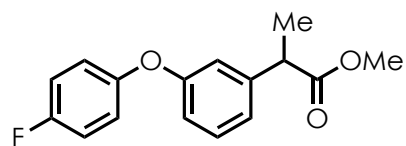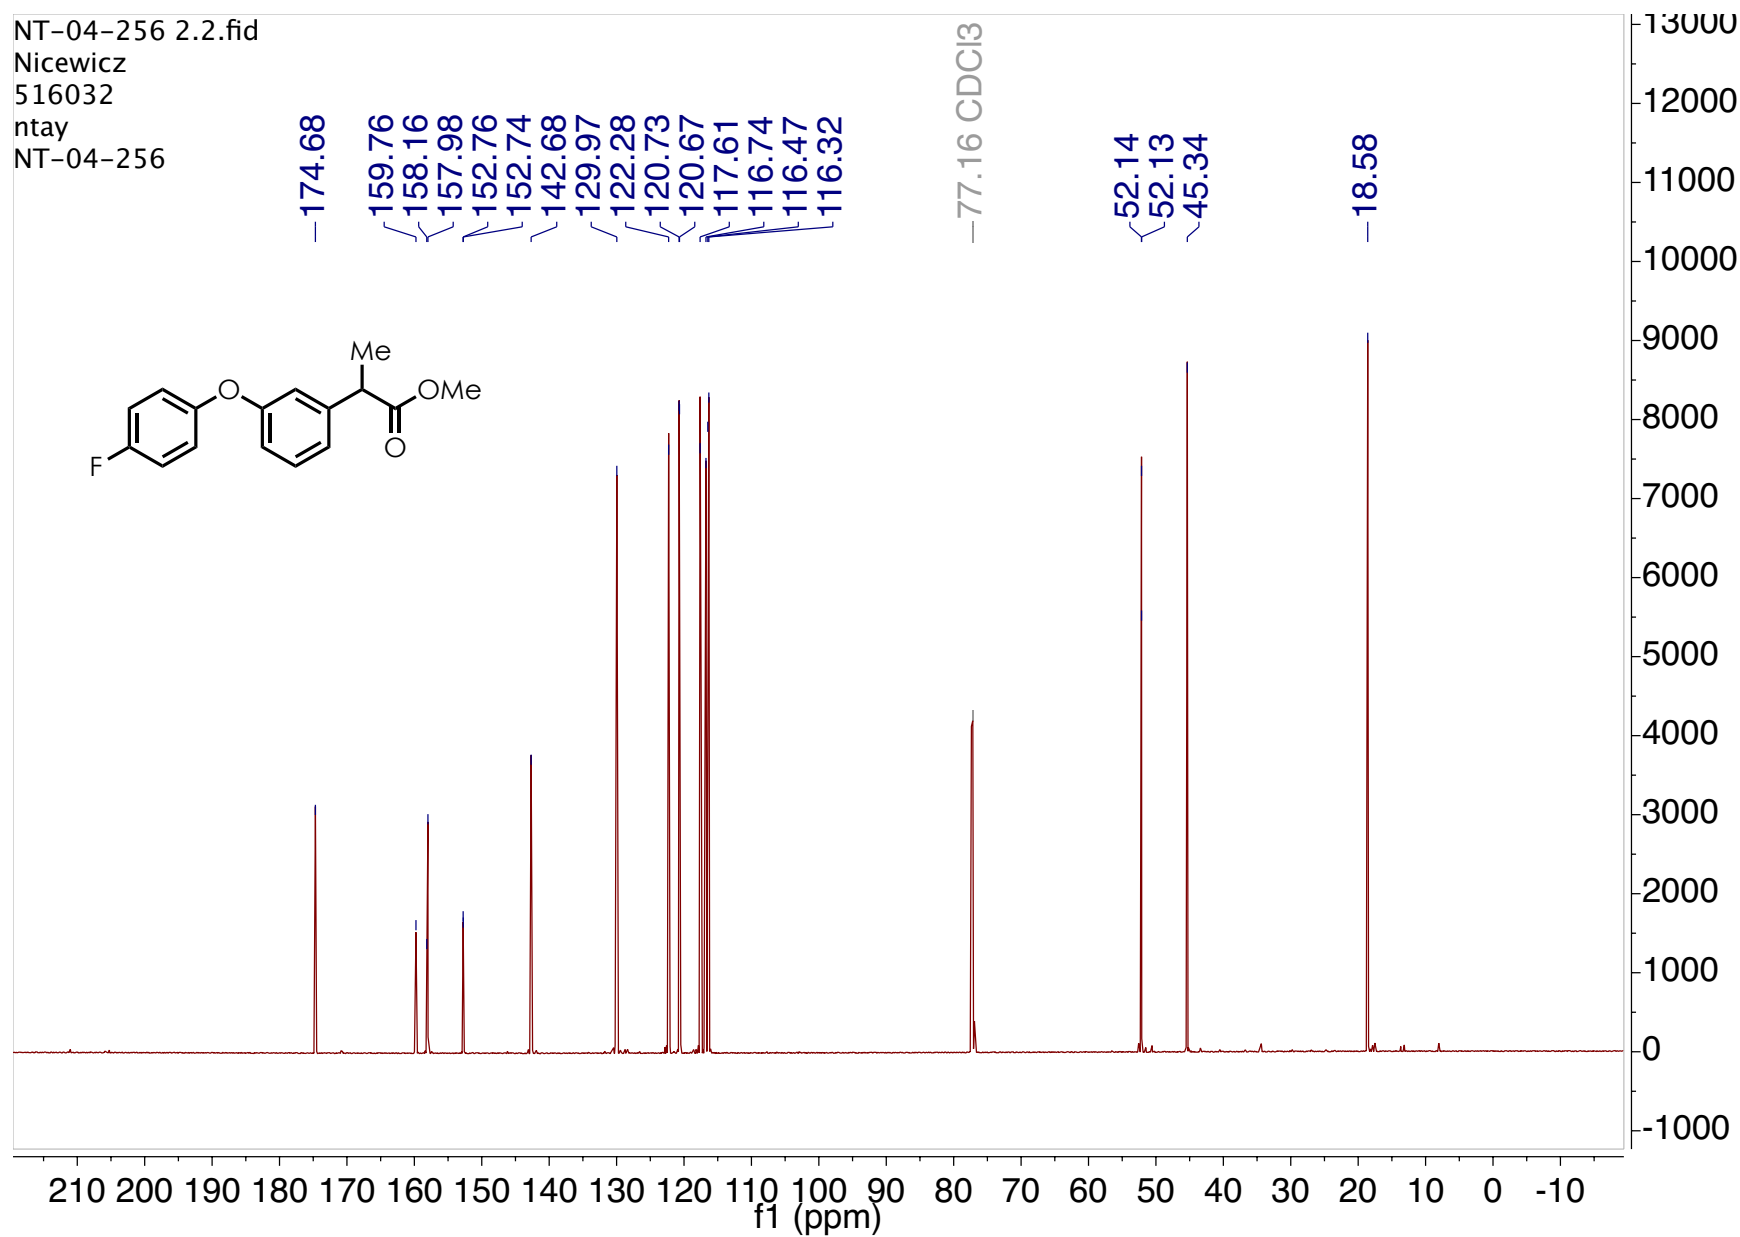

NT-04-256-19F 2.2.fid  
F19 CDCl3 {C:\data\ntay} nmrsu 8

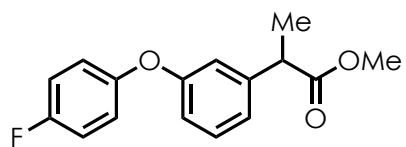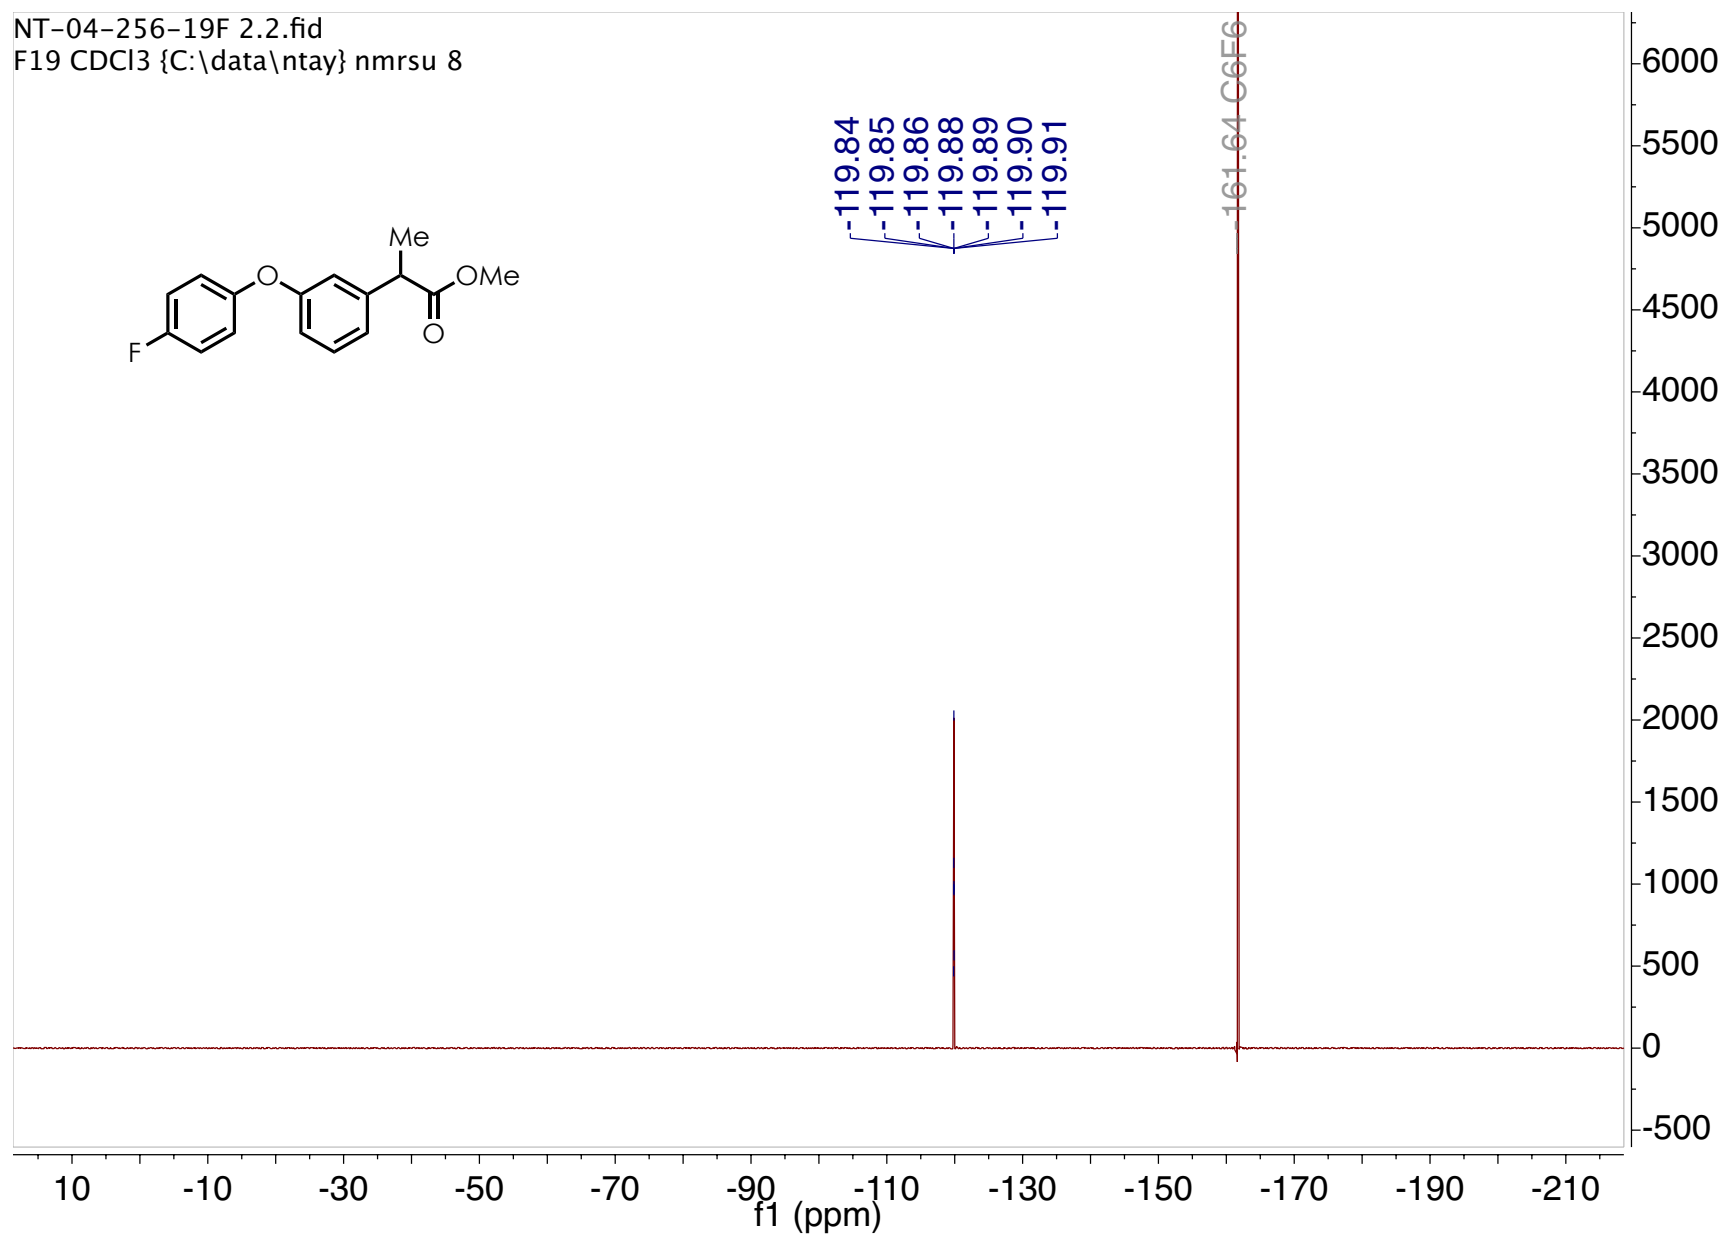

NT-6-2.1.fid

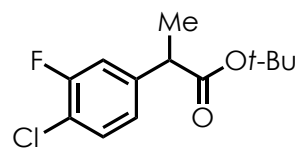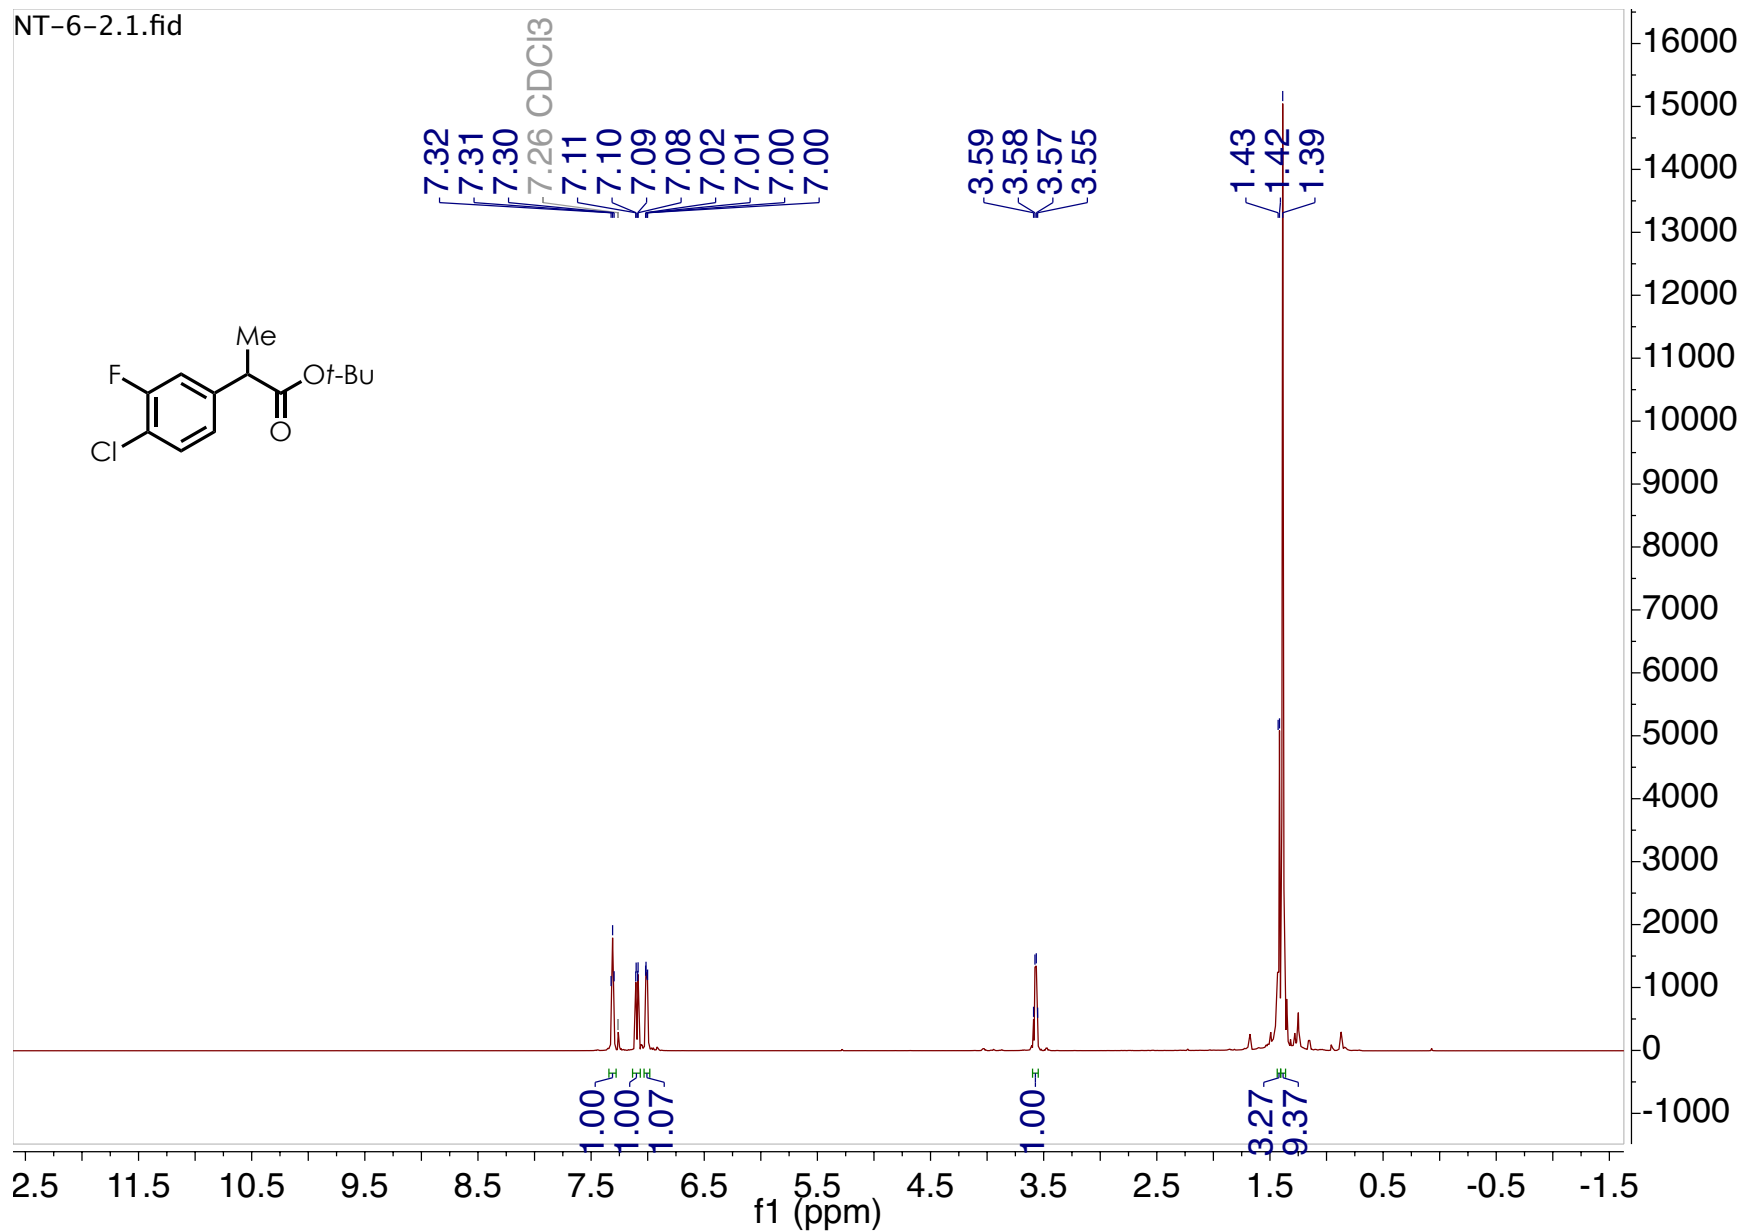

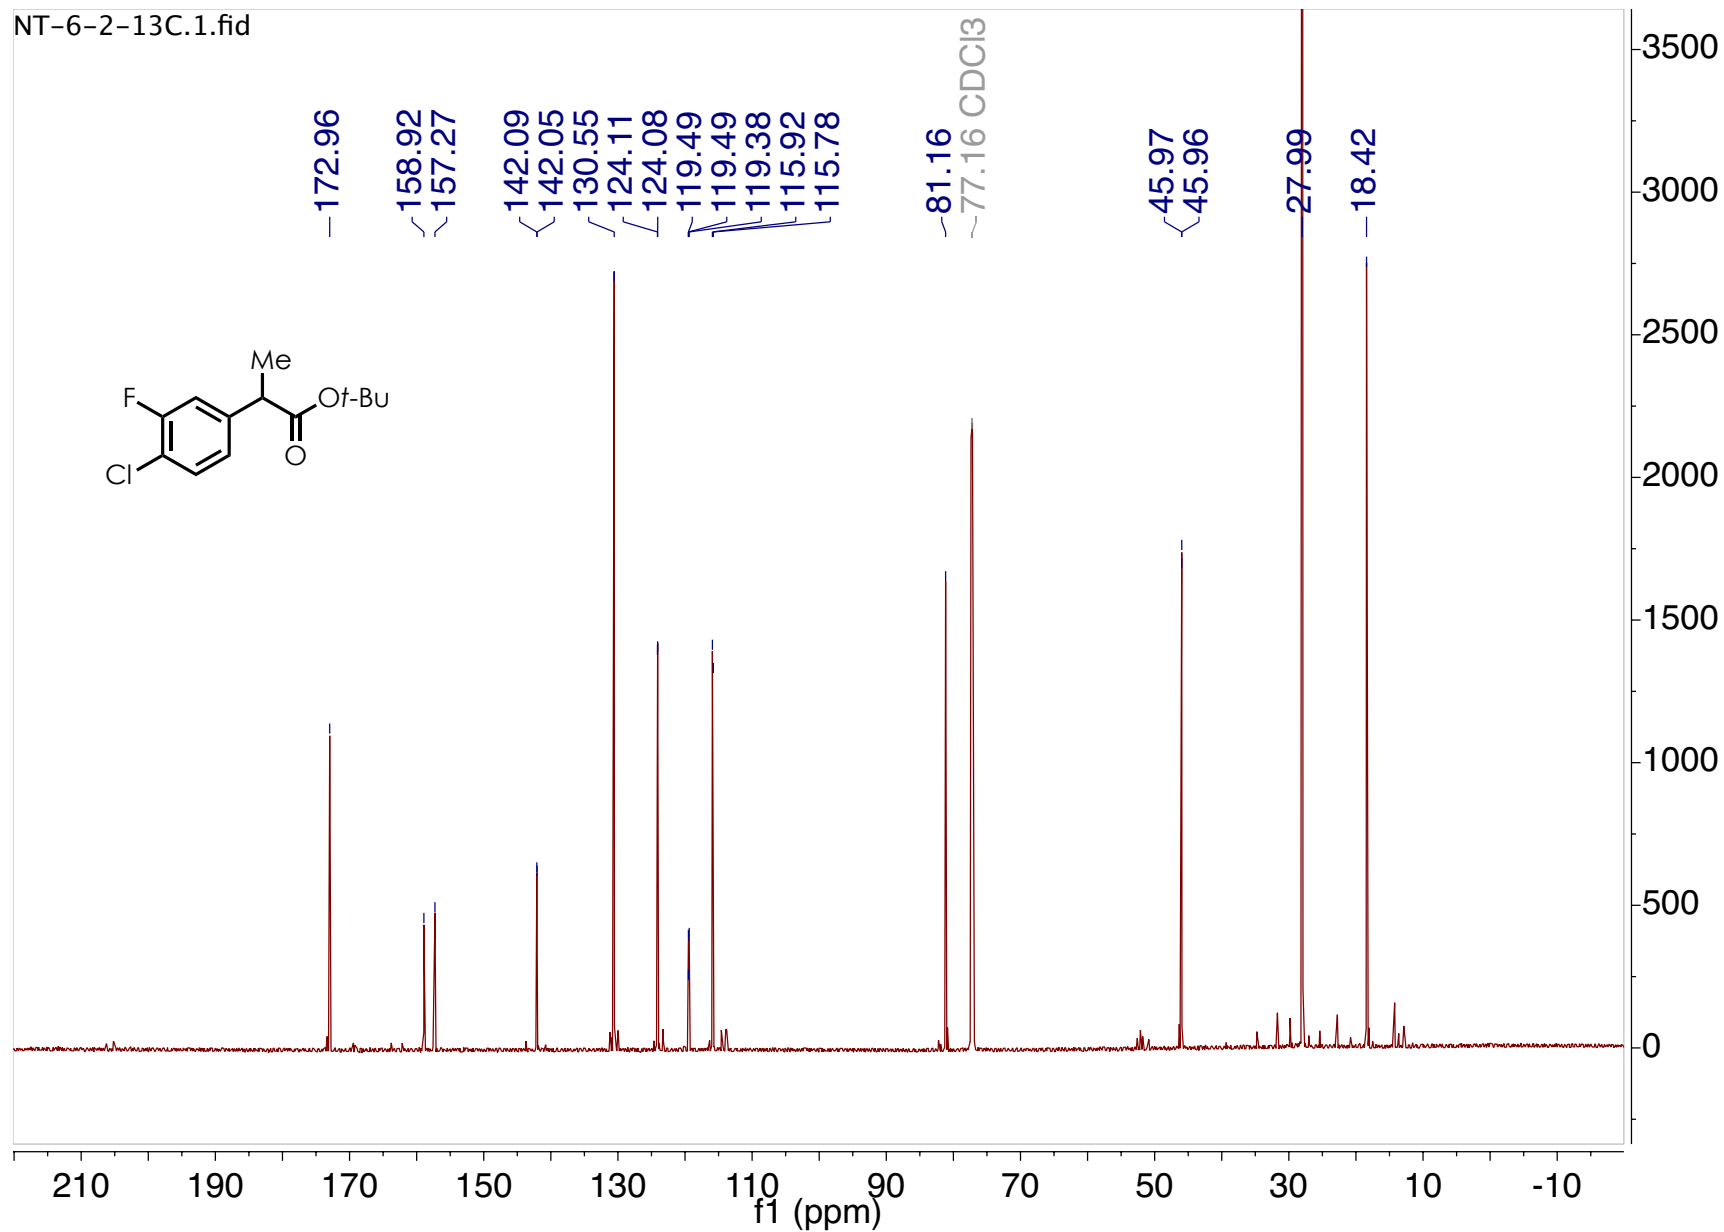

NT-06-2-19F.1.fid

F19 CDCl<sub>3</sub> {C:\data\ntay} nmrsu 45

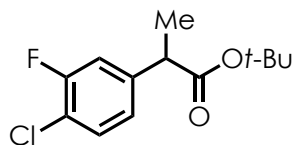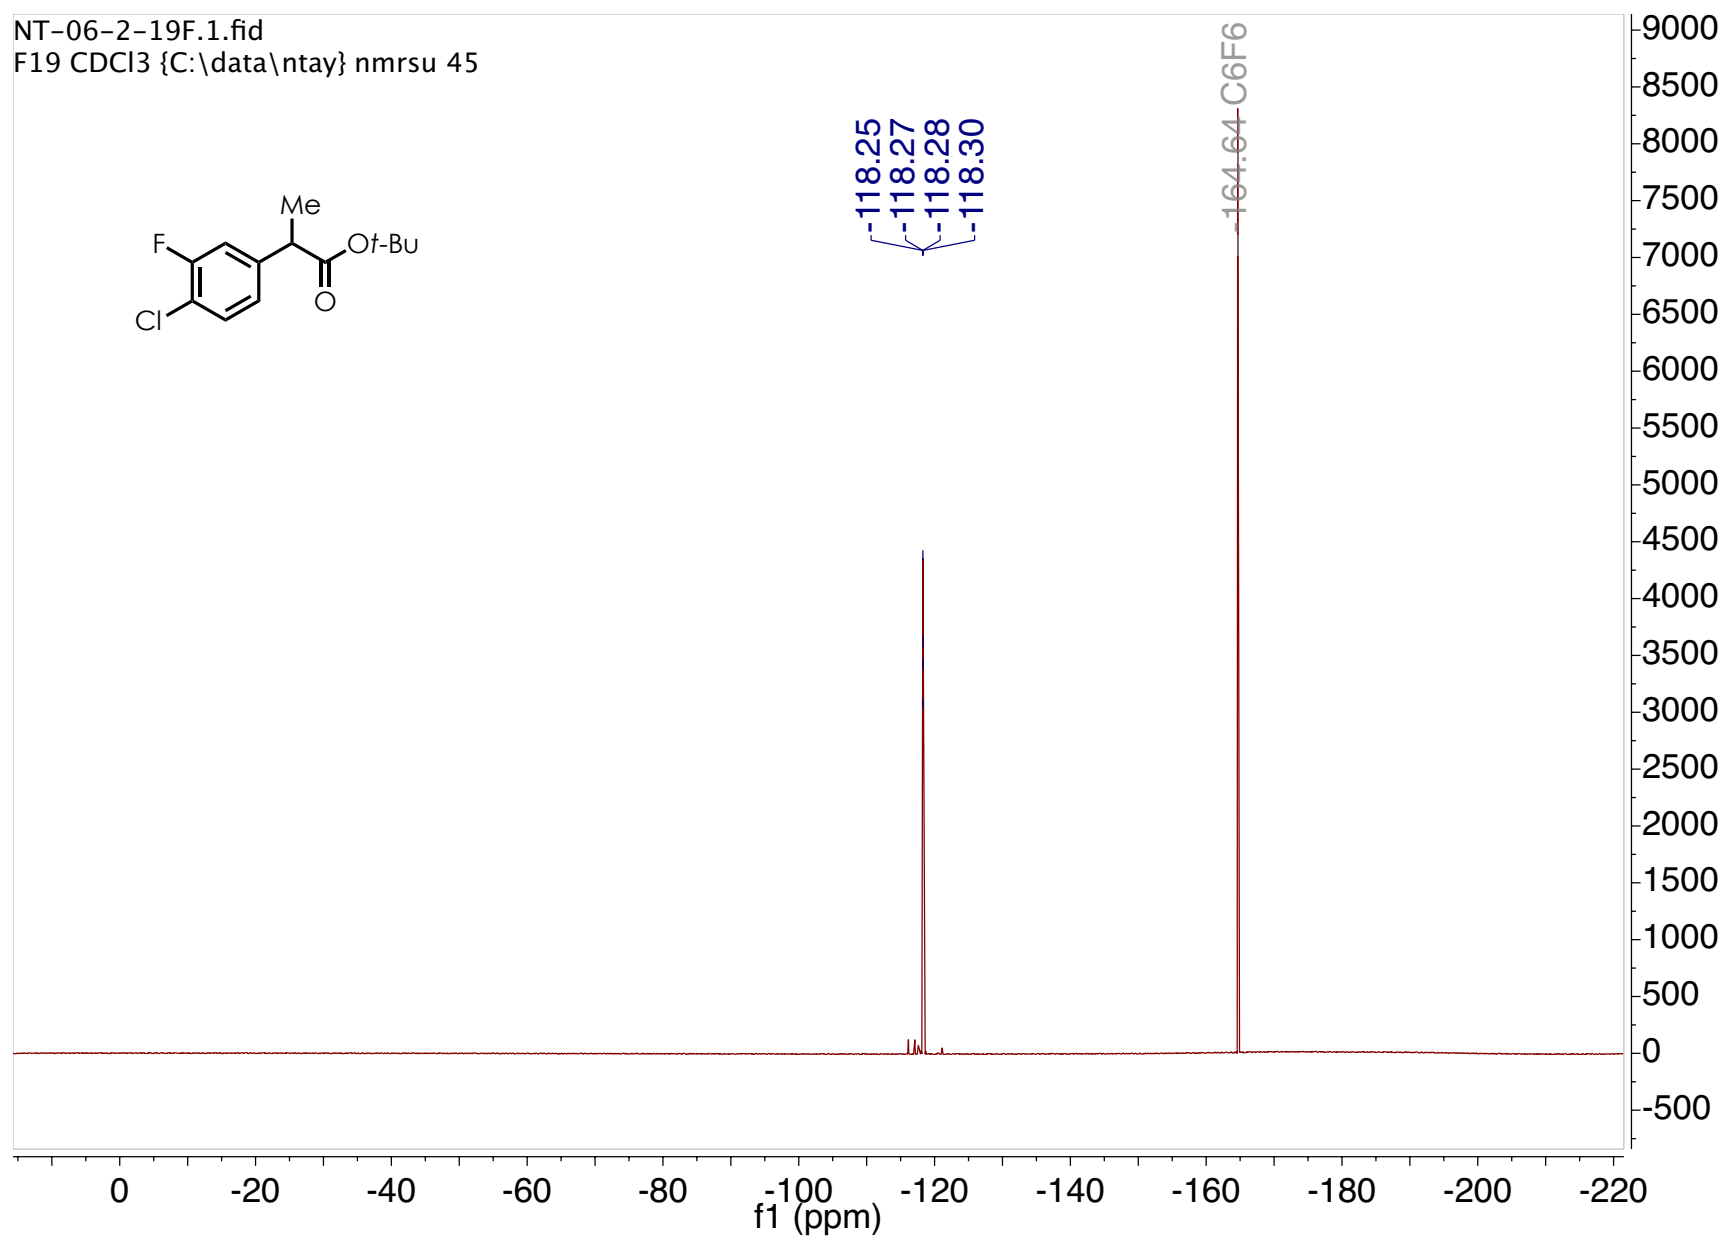

NT-06-11.1.fid  
Nicewicz  
5110718  
ntay  
Title NT-06-11

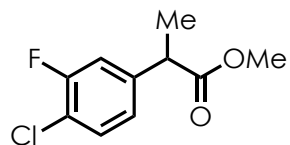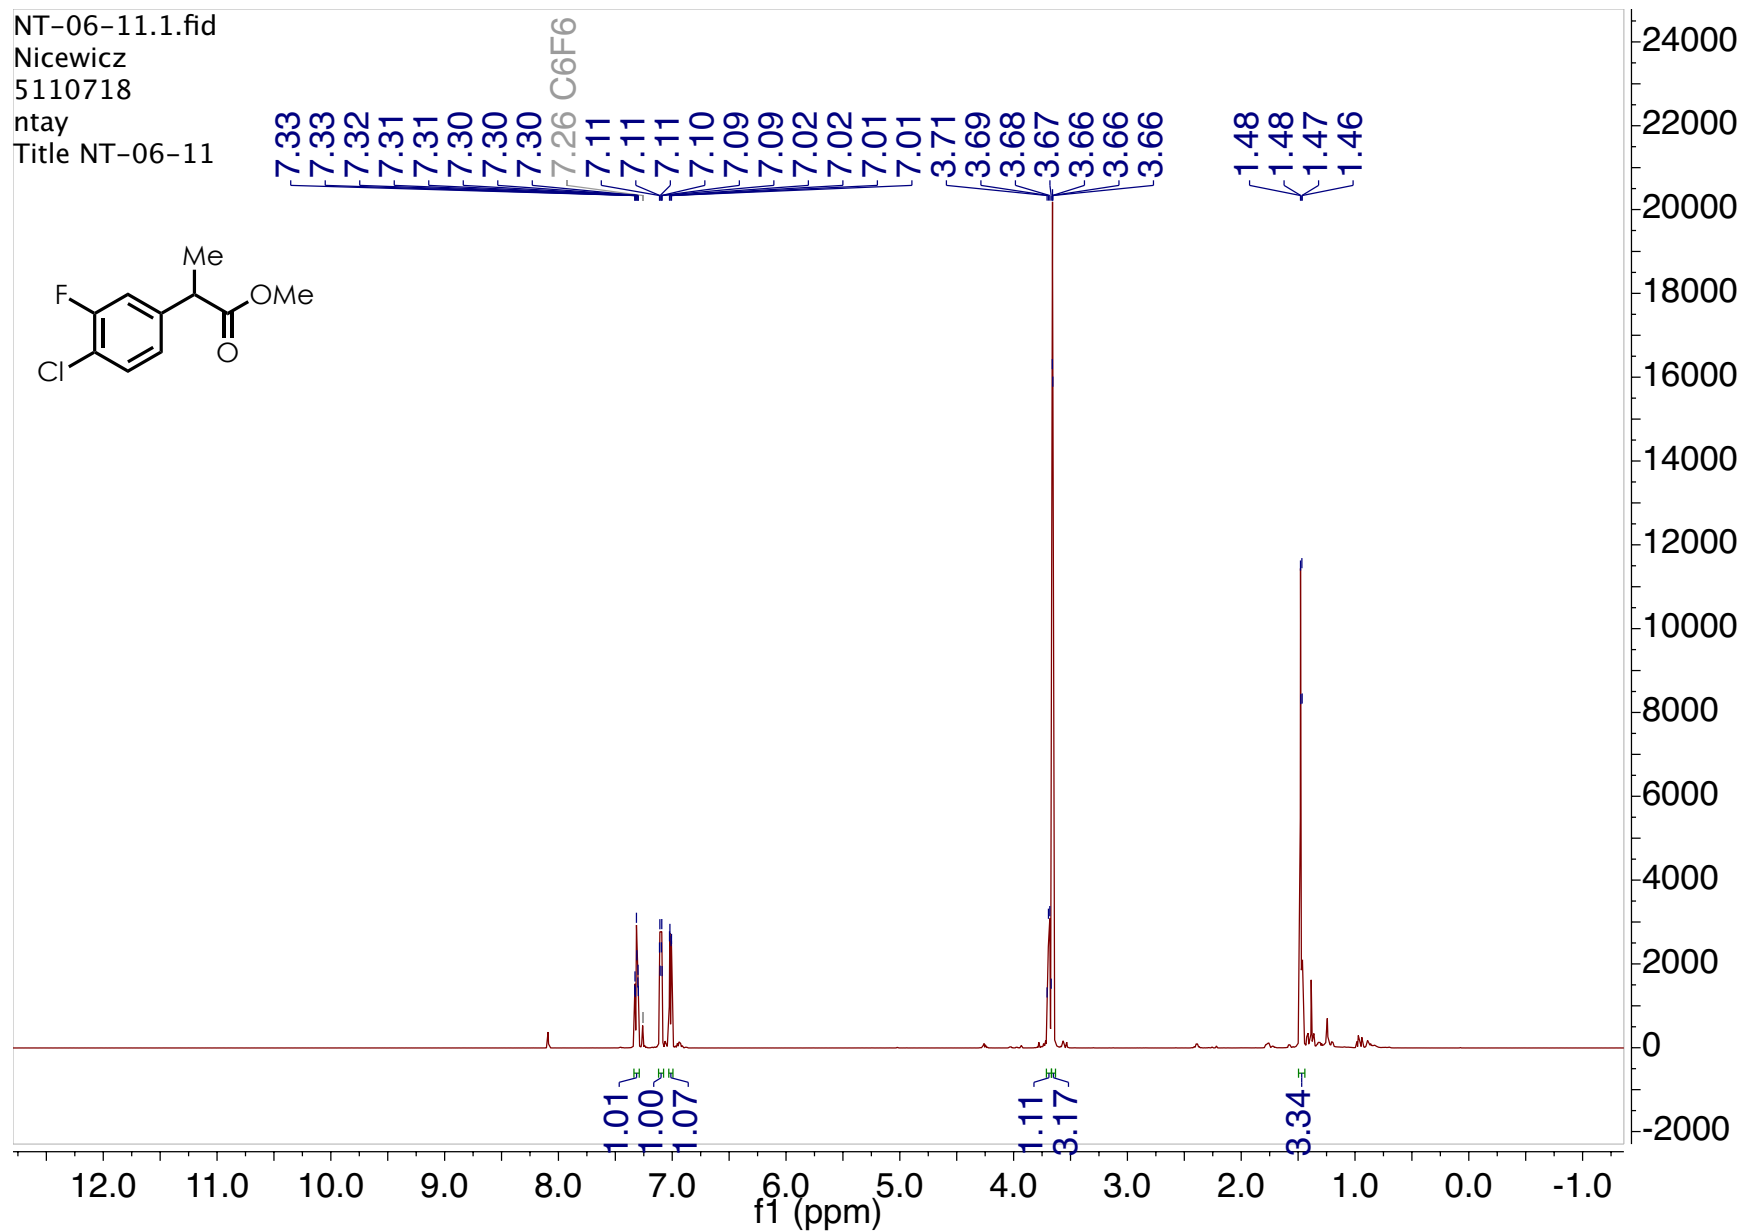

NT-06-11 2.2.fid  
Nicewicz  
5110718  
ntay  
Title NT-06-11

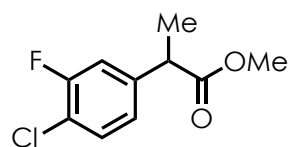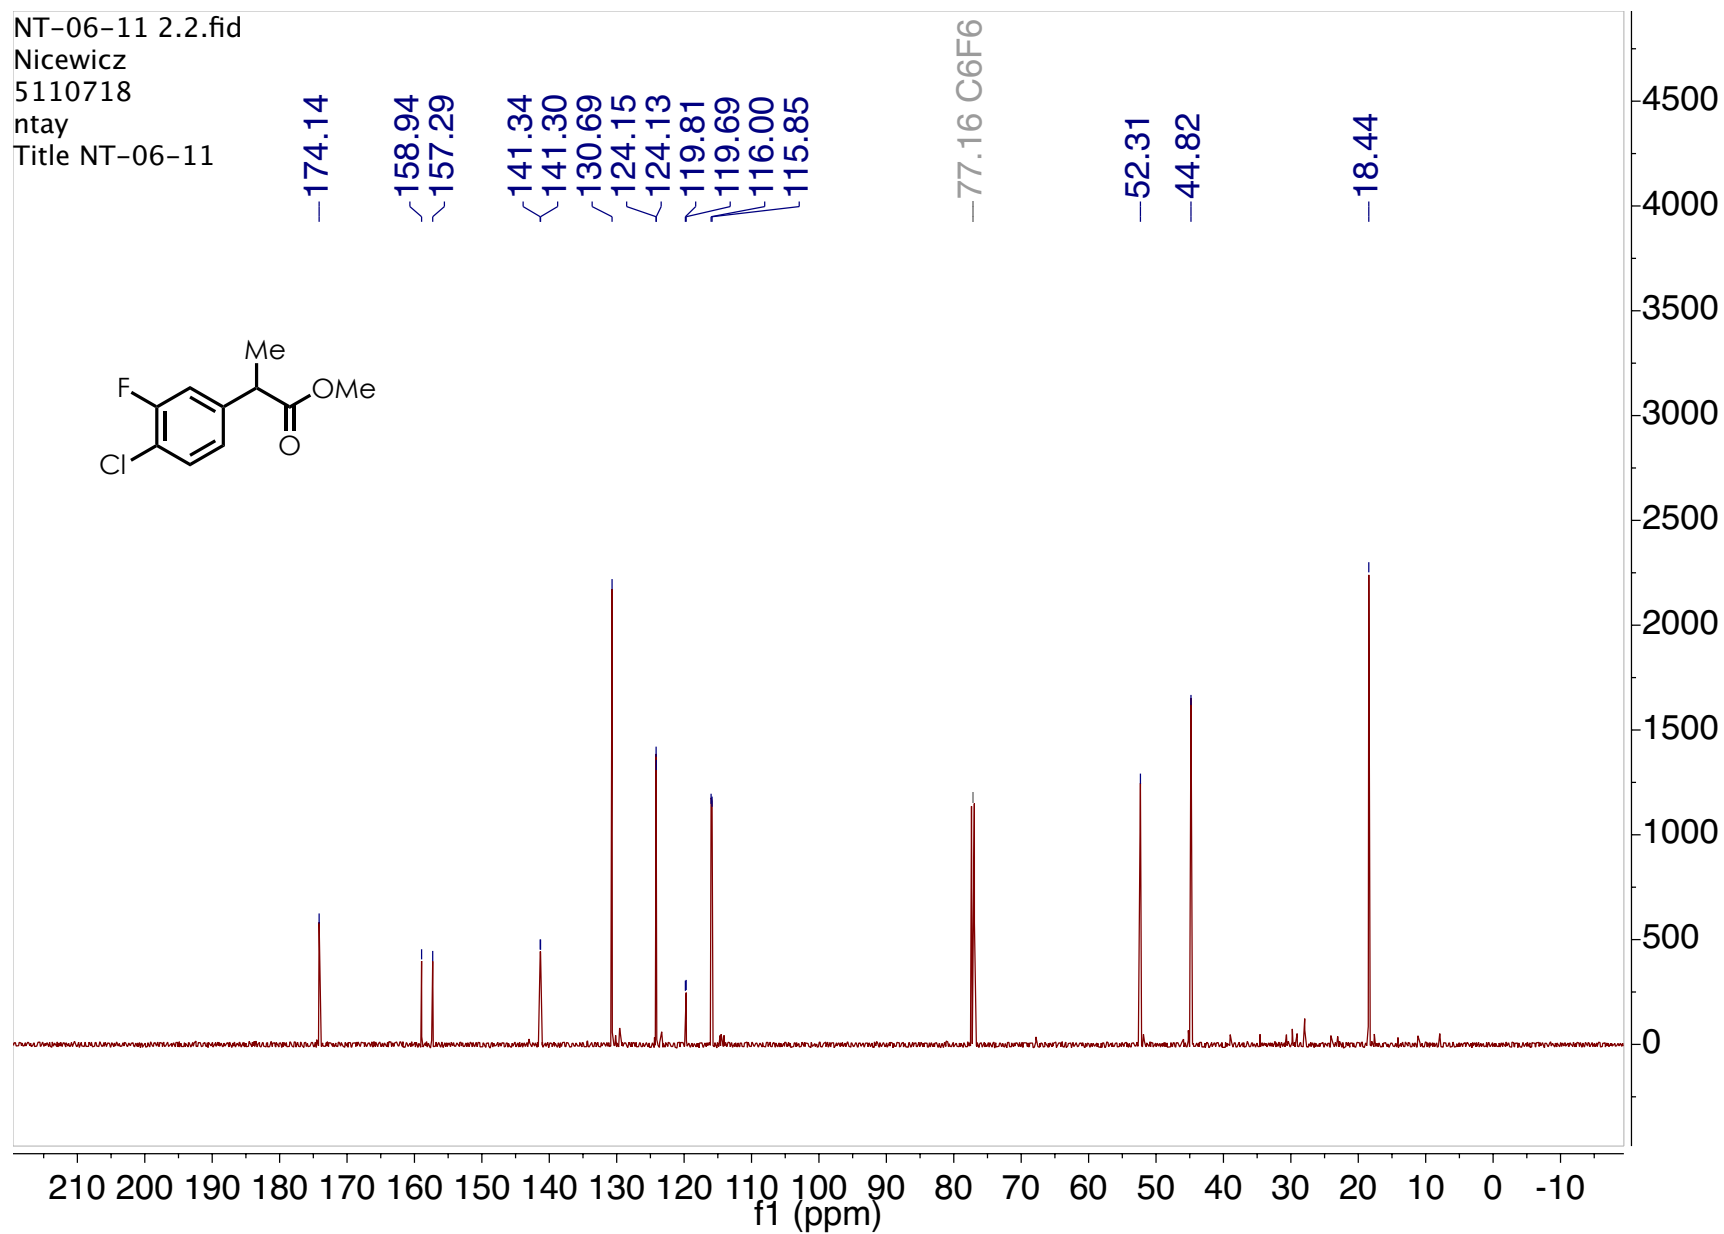

NT-06-11-19F 2.1.fid  
F19 CDCl3 {C:\data\ntay} nmrsu 12

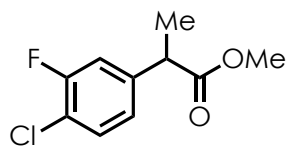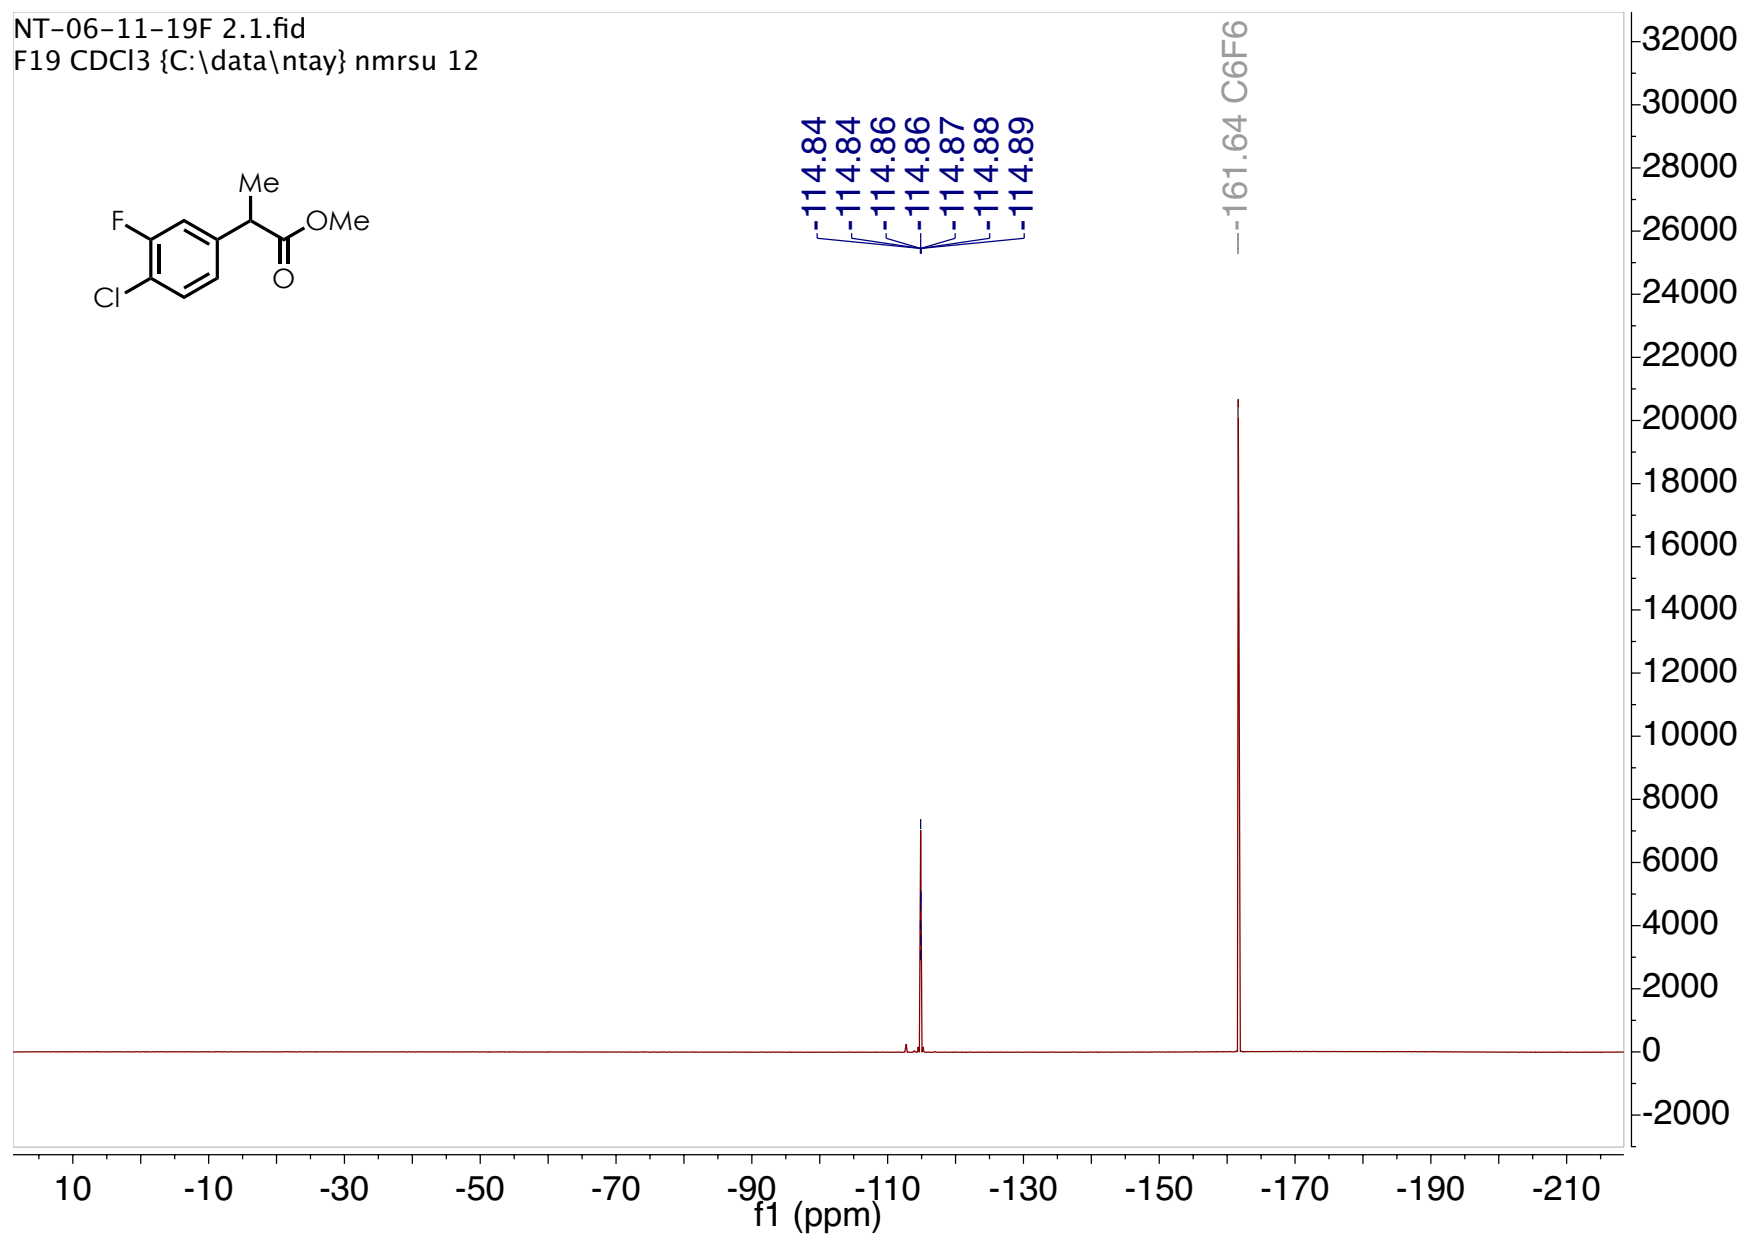

NT-06-30-B.1.fid

Nicewicz

5110718

ntay

NT-06-30-B

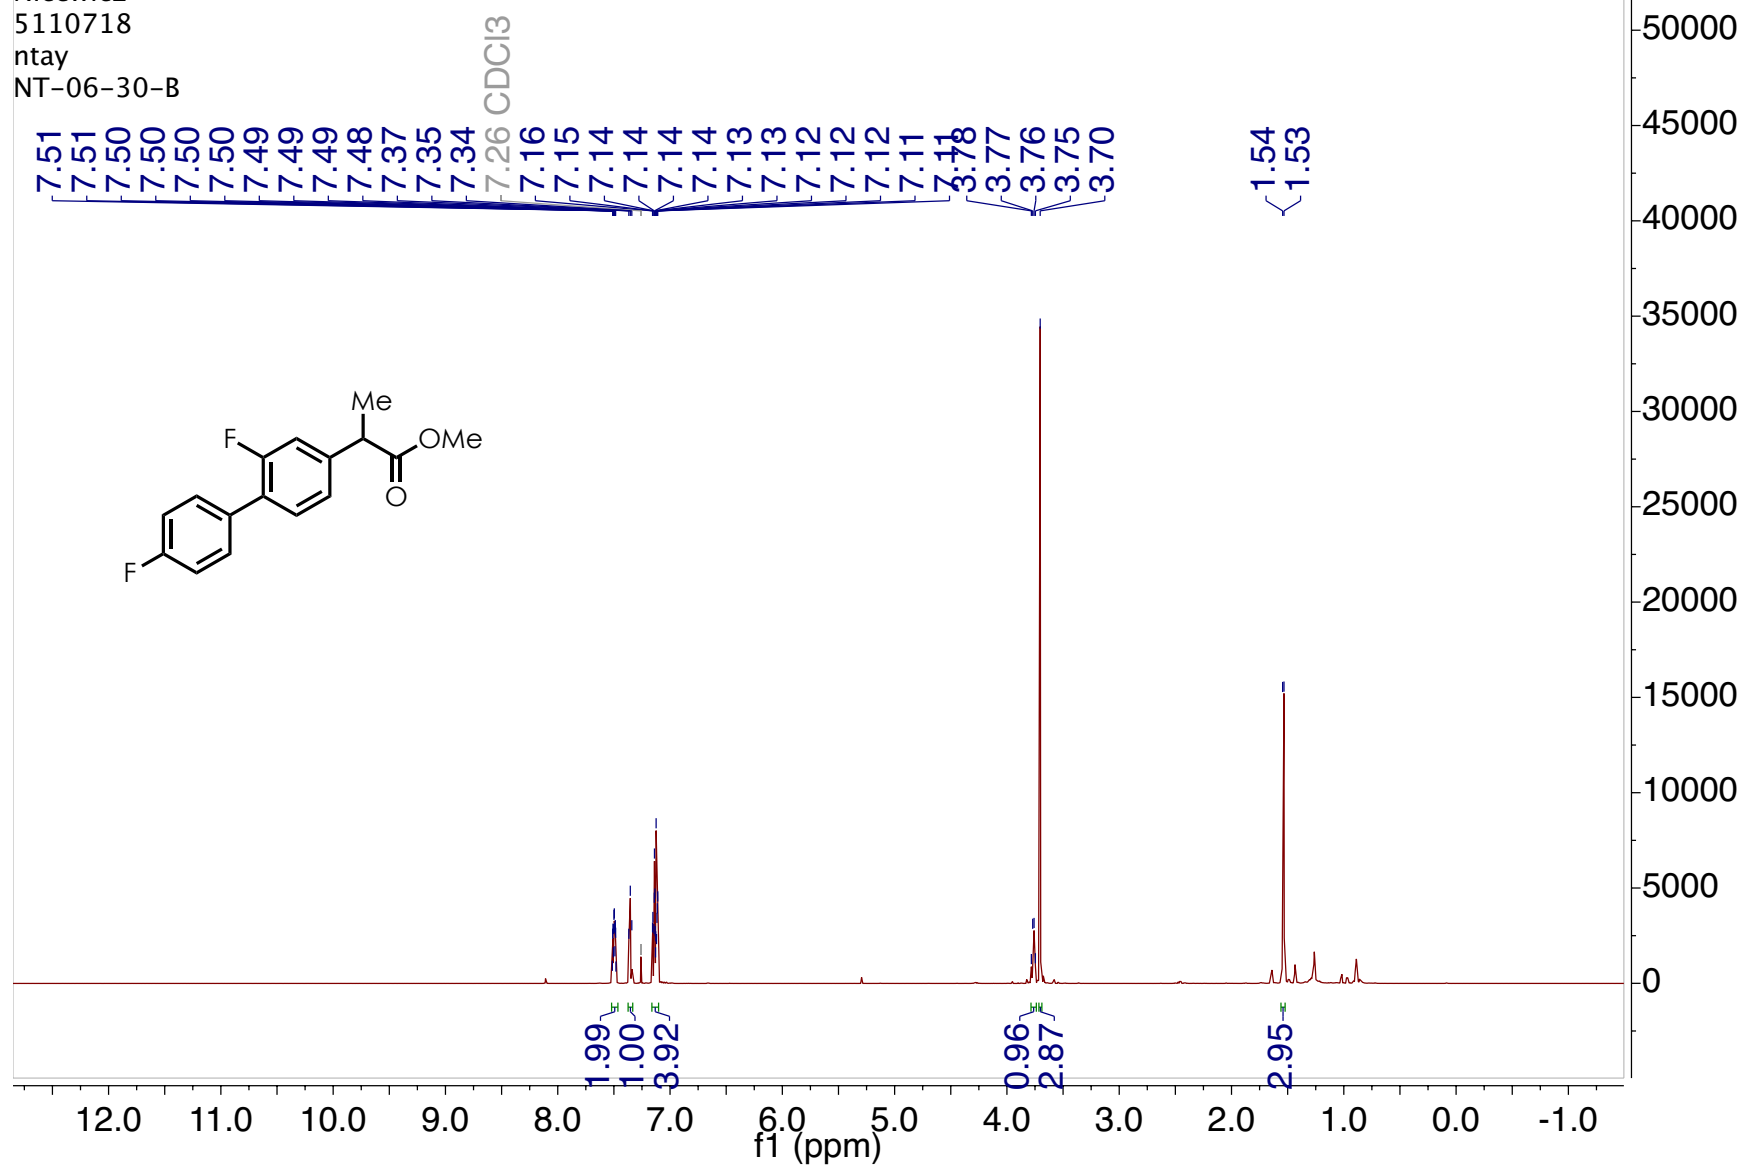

NT-06-30-B 2.2.fid

Nicewicz

5110718

ntay

NT-06-30-B

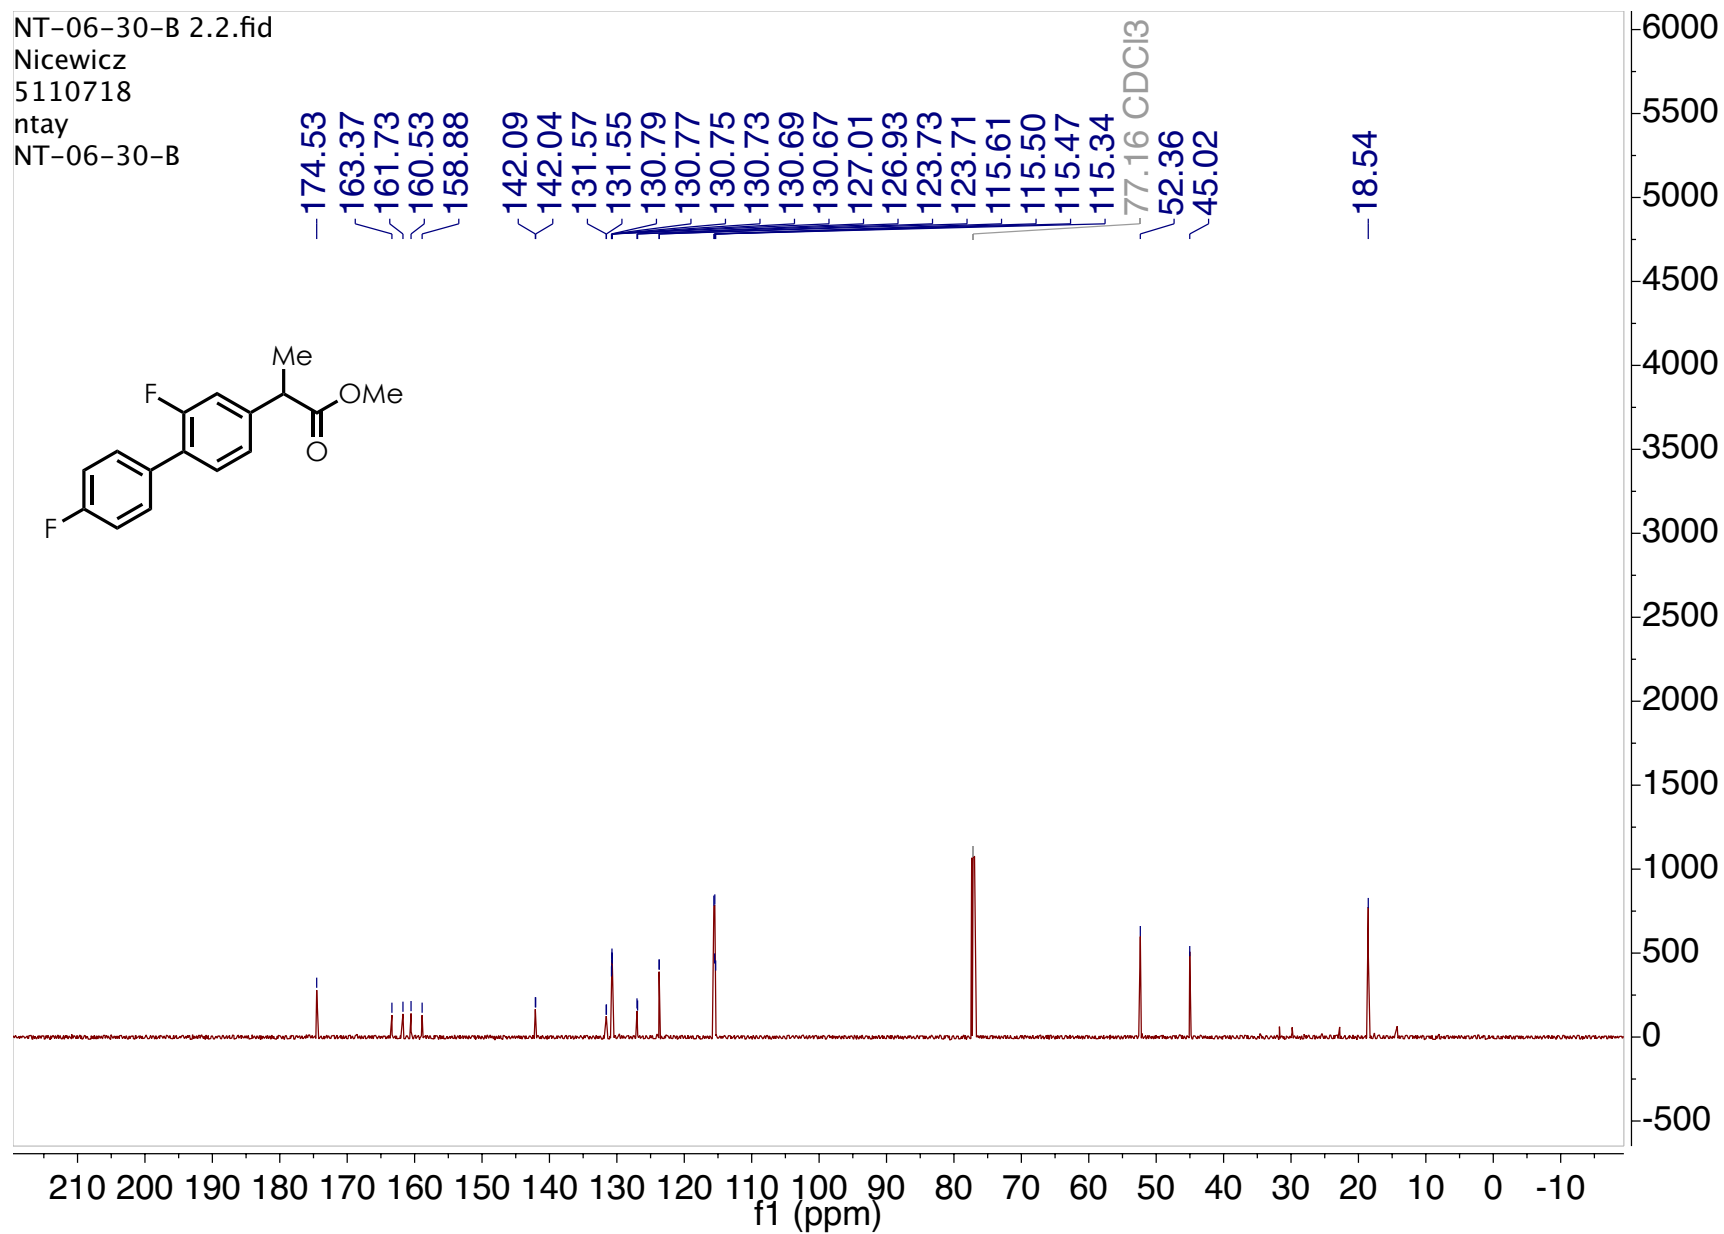

NT-06-30-B-19F.1.fid  
F19 CDCl3 {C:\data\ntay} nmrsu 40

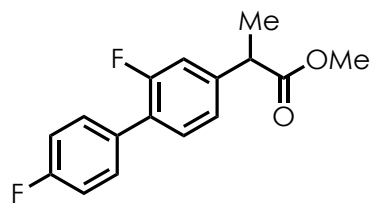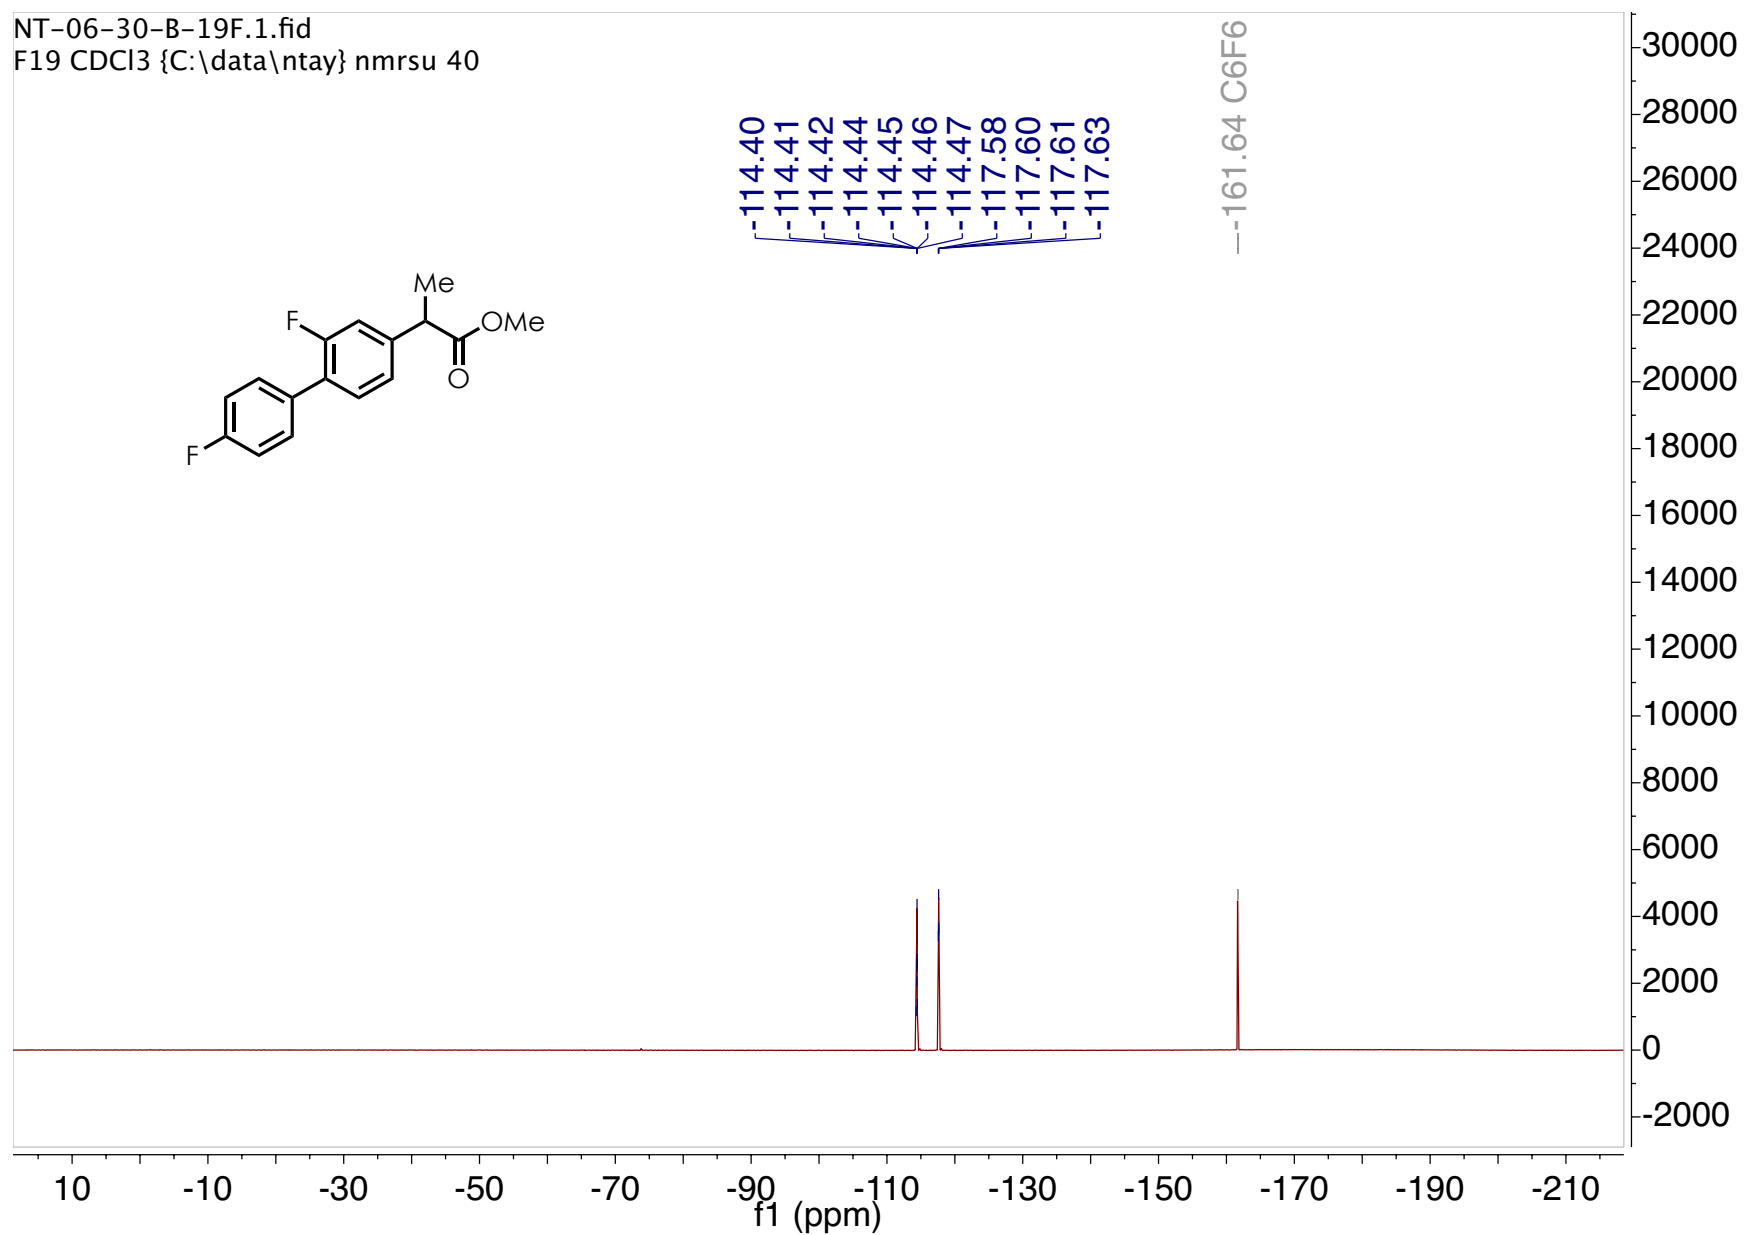

NT-05-201.1.fid  
 Nicewicz  
 C3308  
 ntay  
 NT-05-201

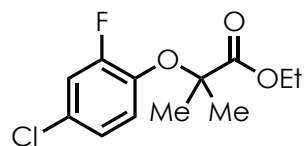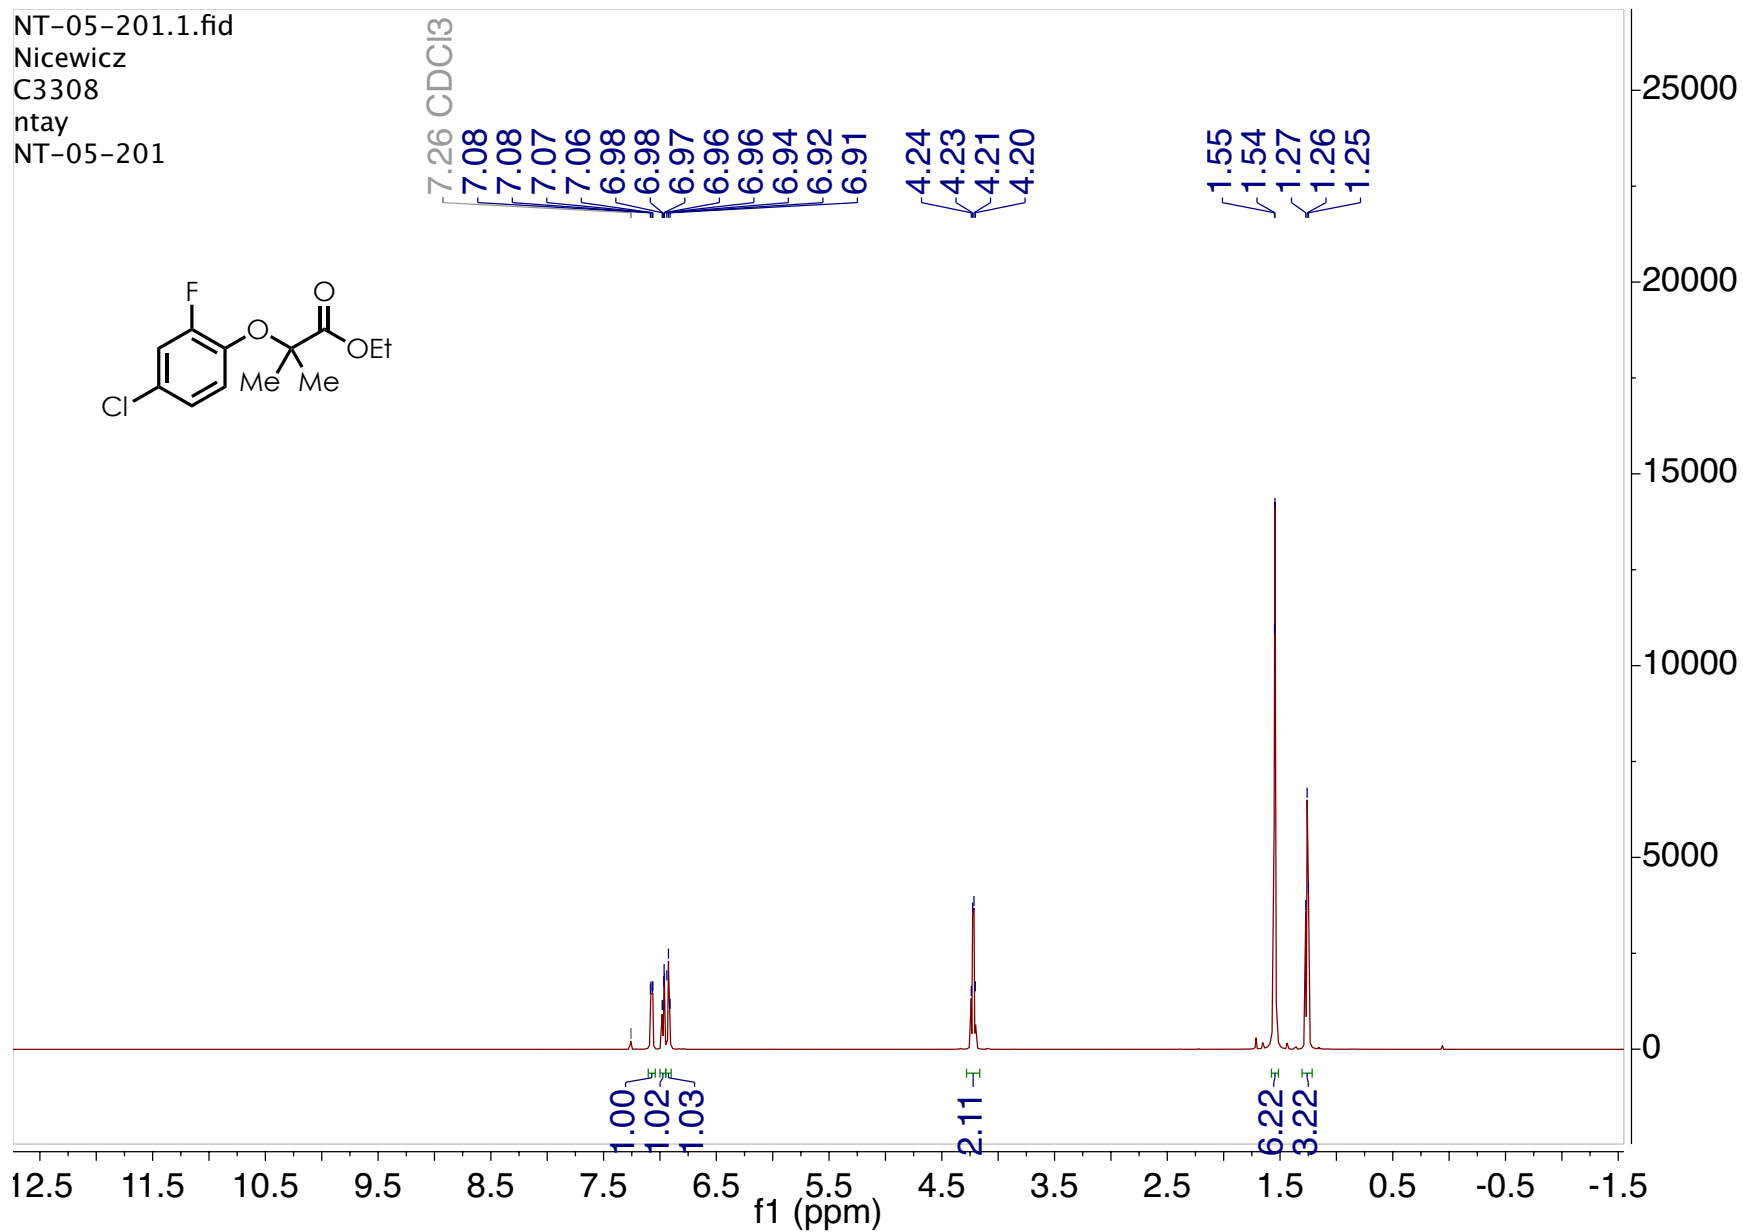

NT-05-201 2.2.fid  
 Nicewicz  
 C3308  
 ntay  
 NT-05-201

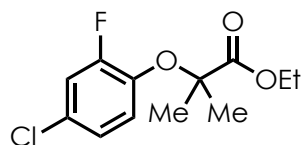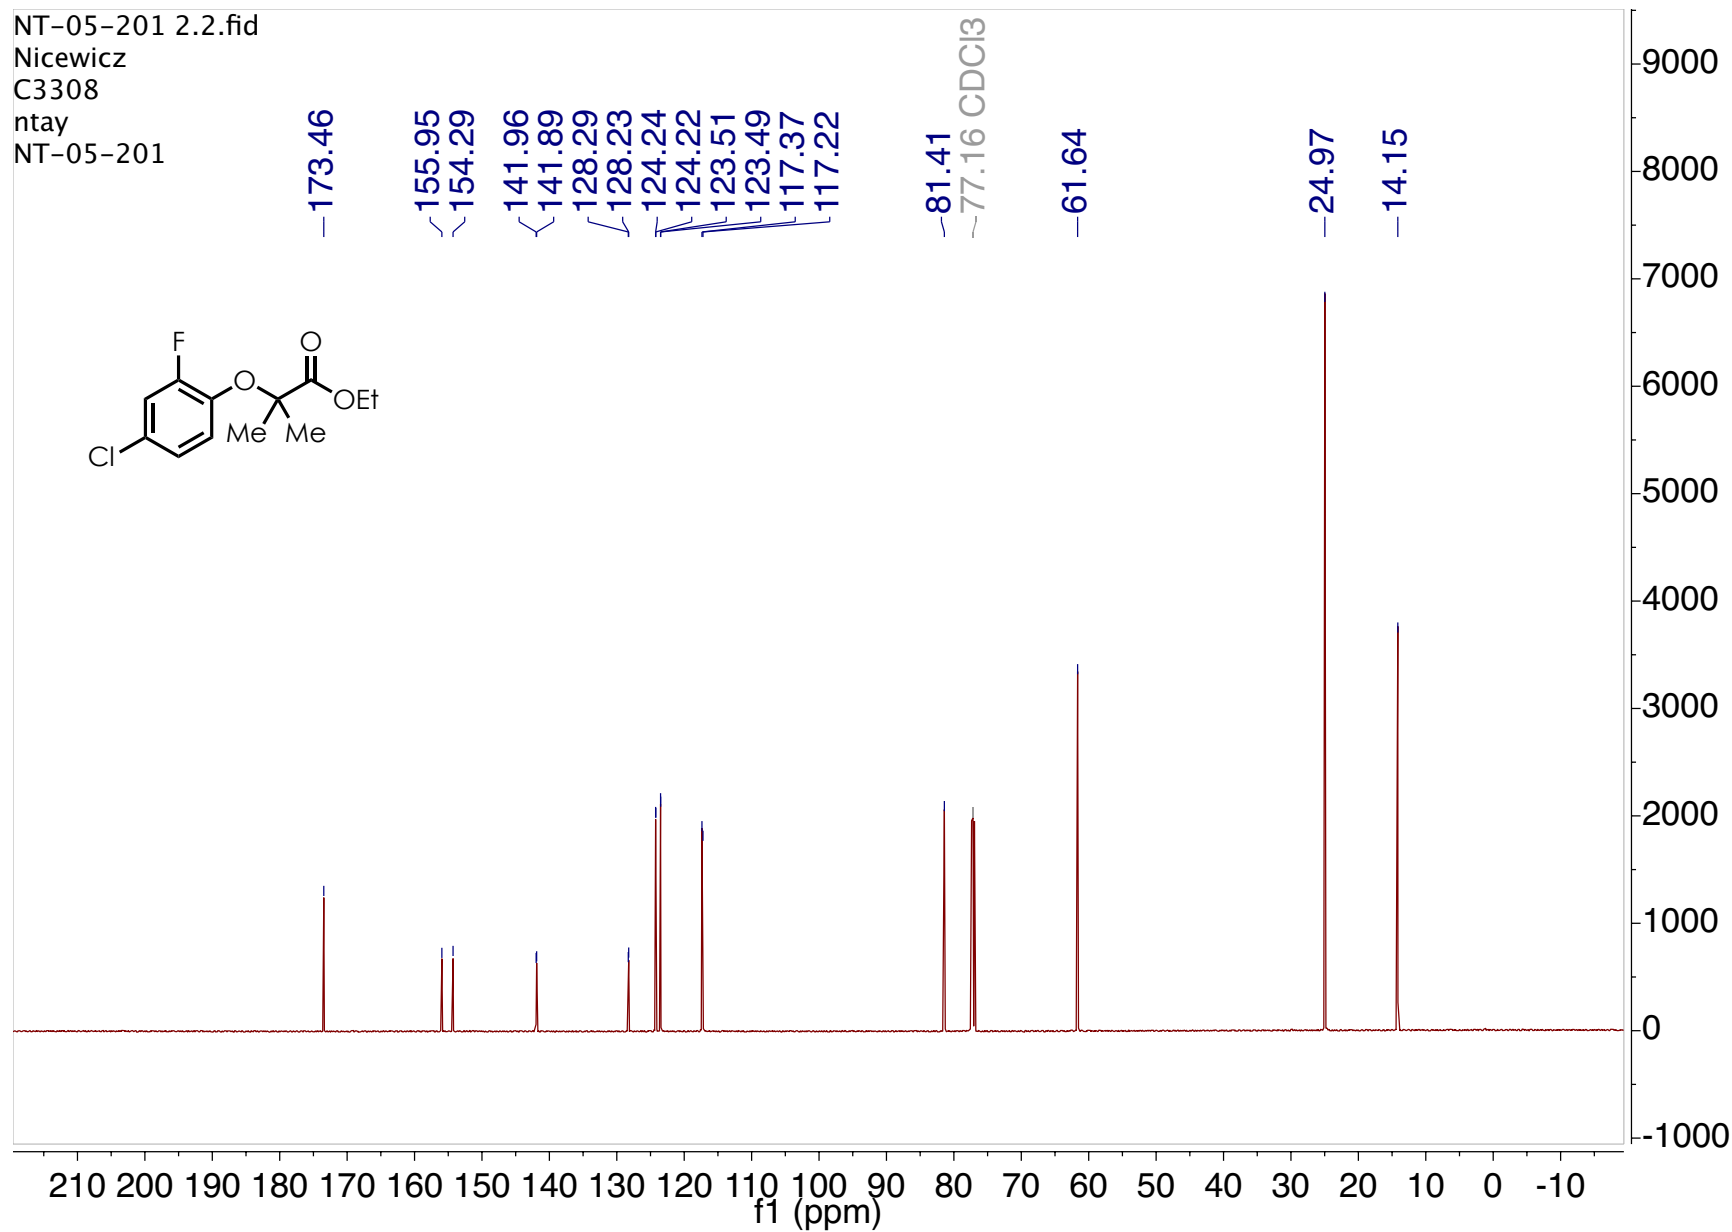

NT-05-201-19F 2.1.fid  
F19 CDCl<sub>3</sub> {C:\data\ntay} nmrsu 5

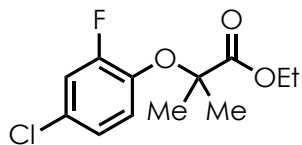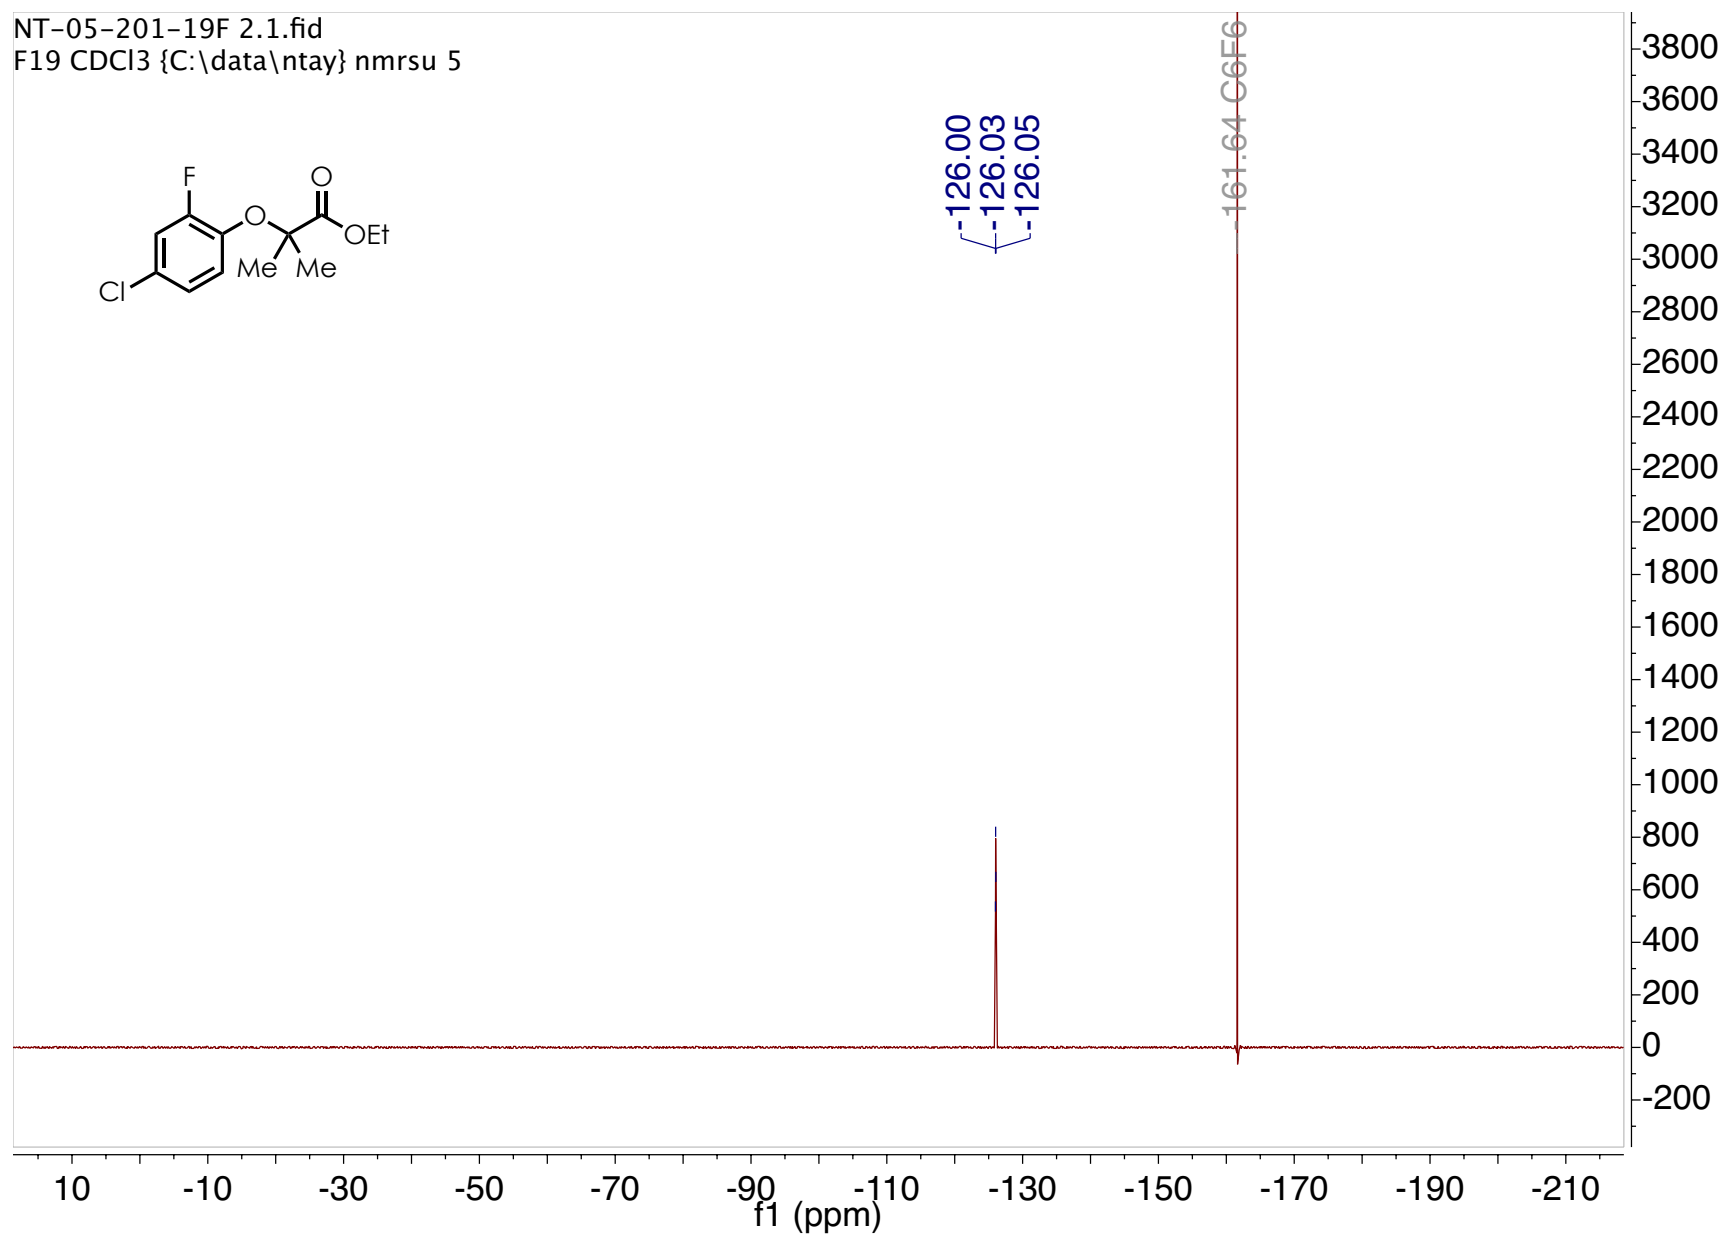

NT-06-32.1.fid

Nicewicz

5110718

ntay

NT-06-32

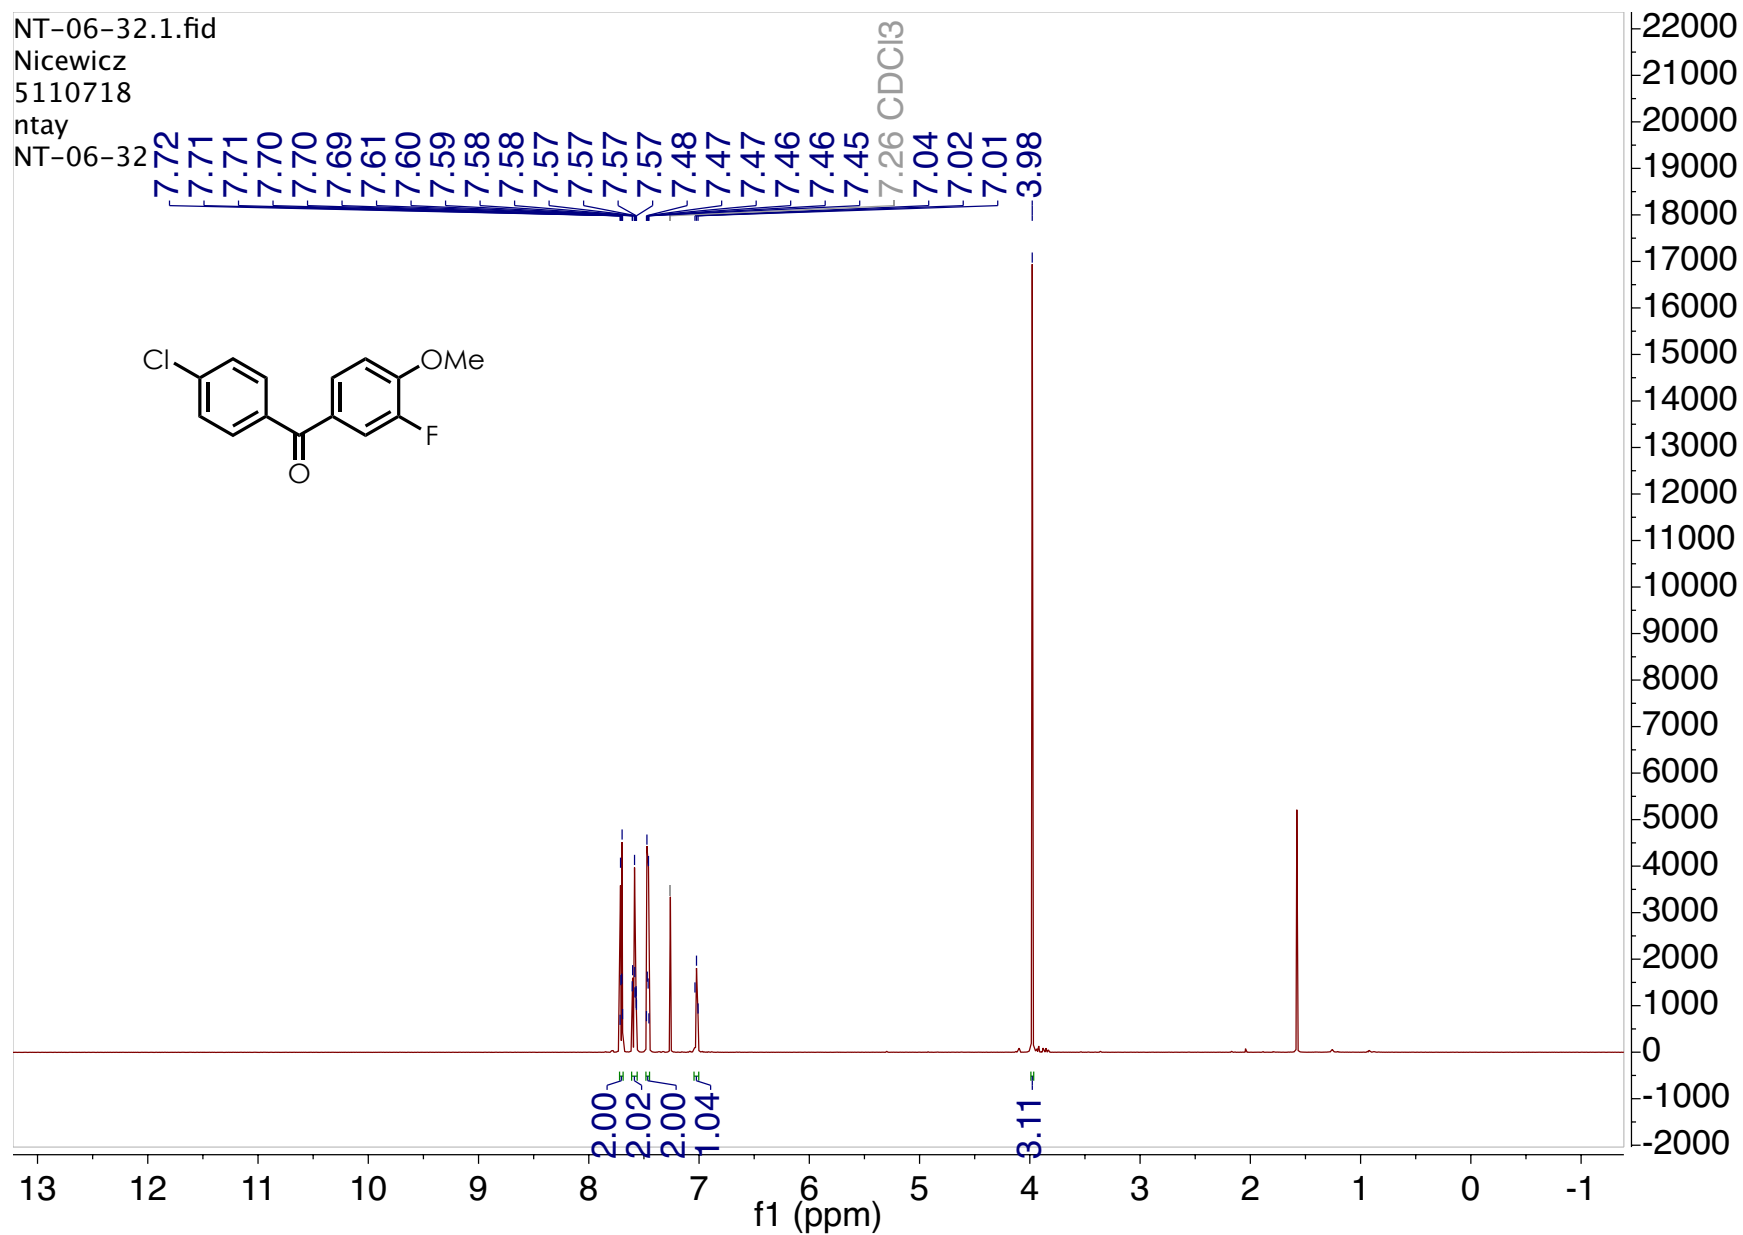

NT-06-32 2.2.fid

Nicewicz

5110718

ntay

NT-06-32

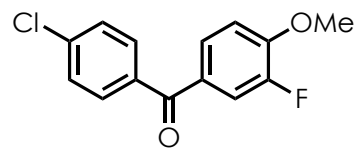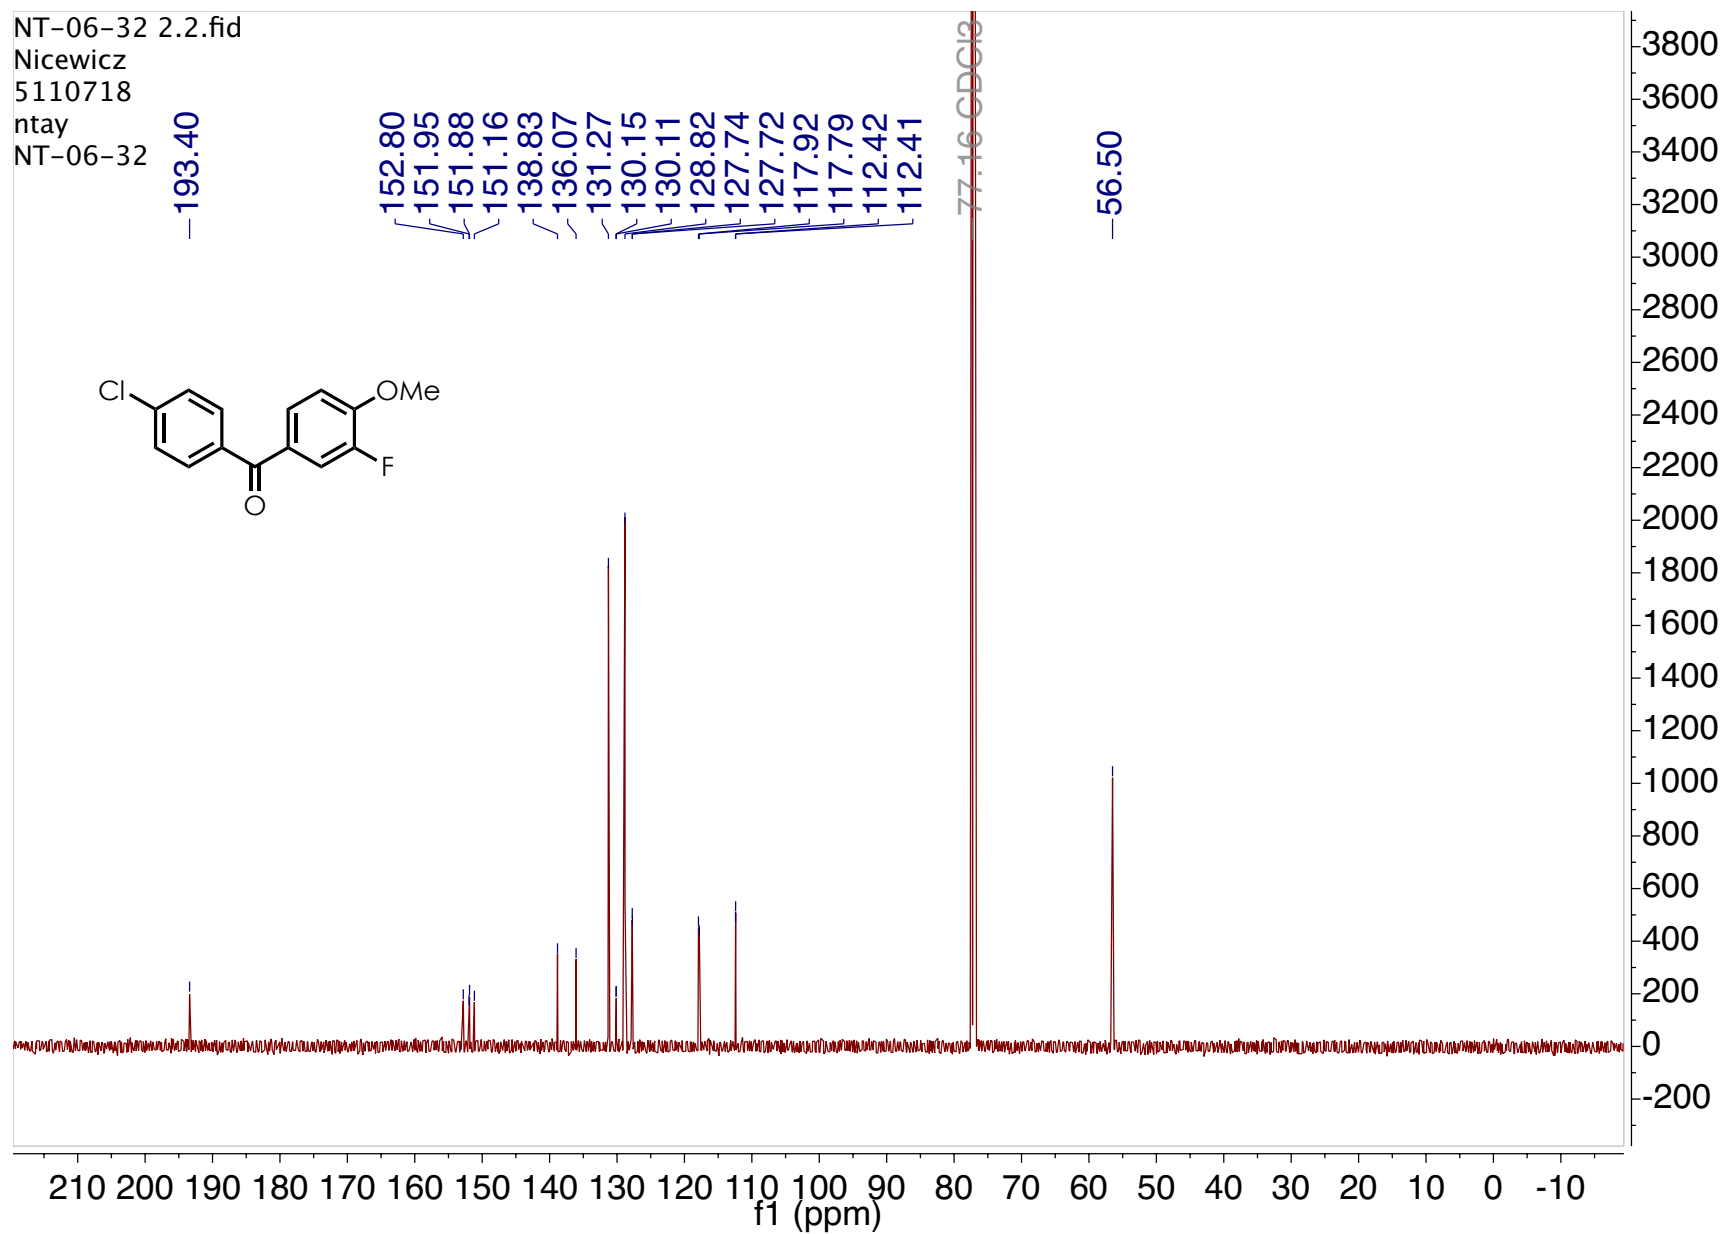

NT-06-32-19F.1.fid

F19 CDCl<sub>3</sub> {C:\data\ntay} nmrsu 51

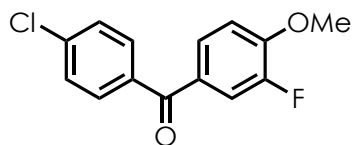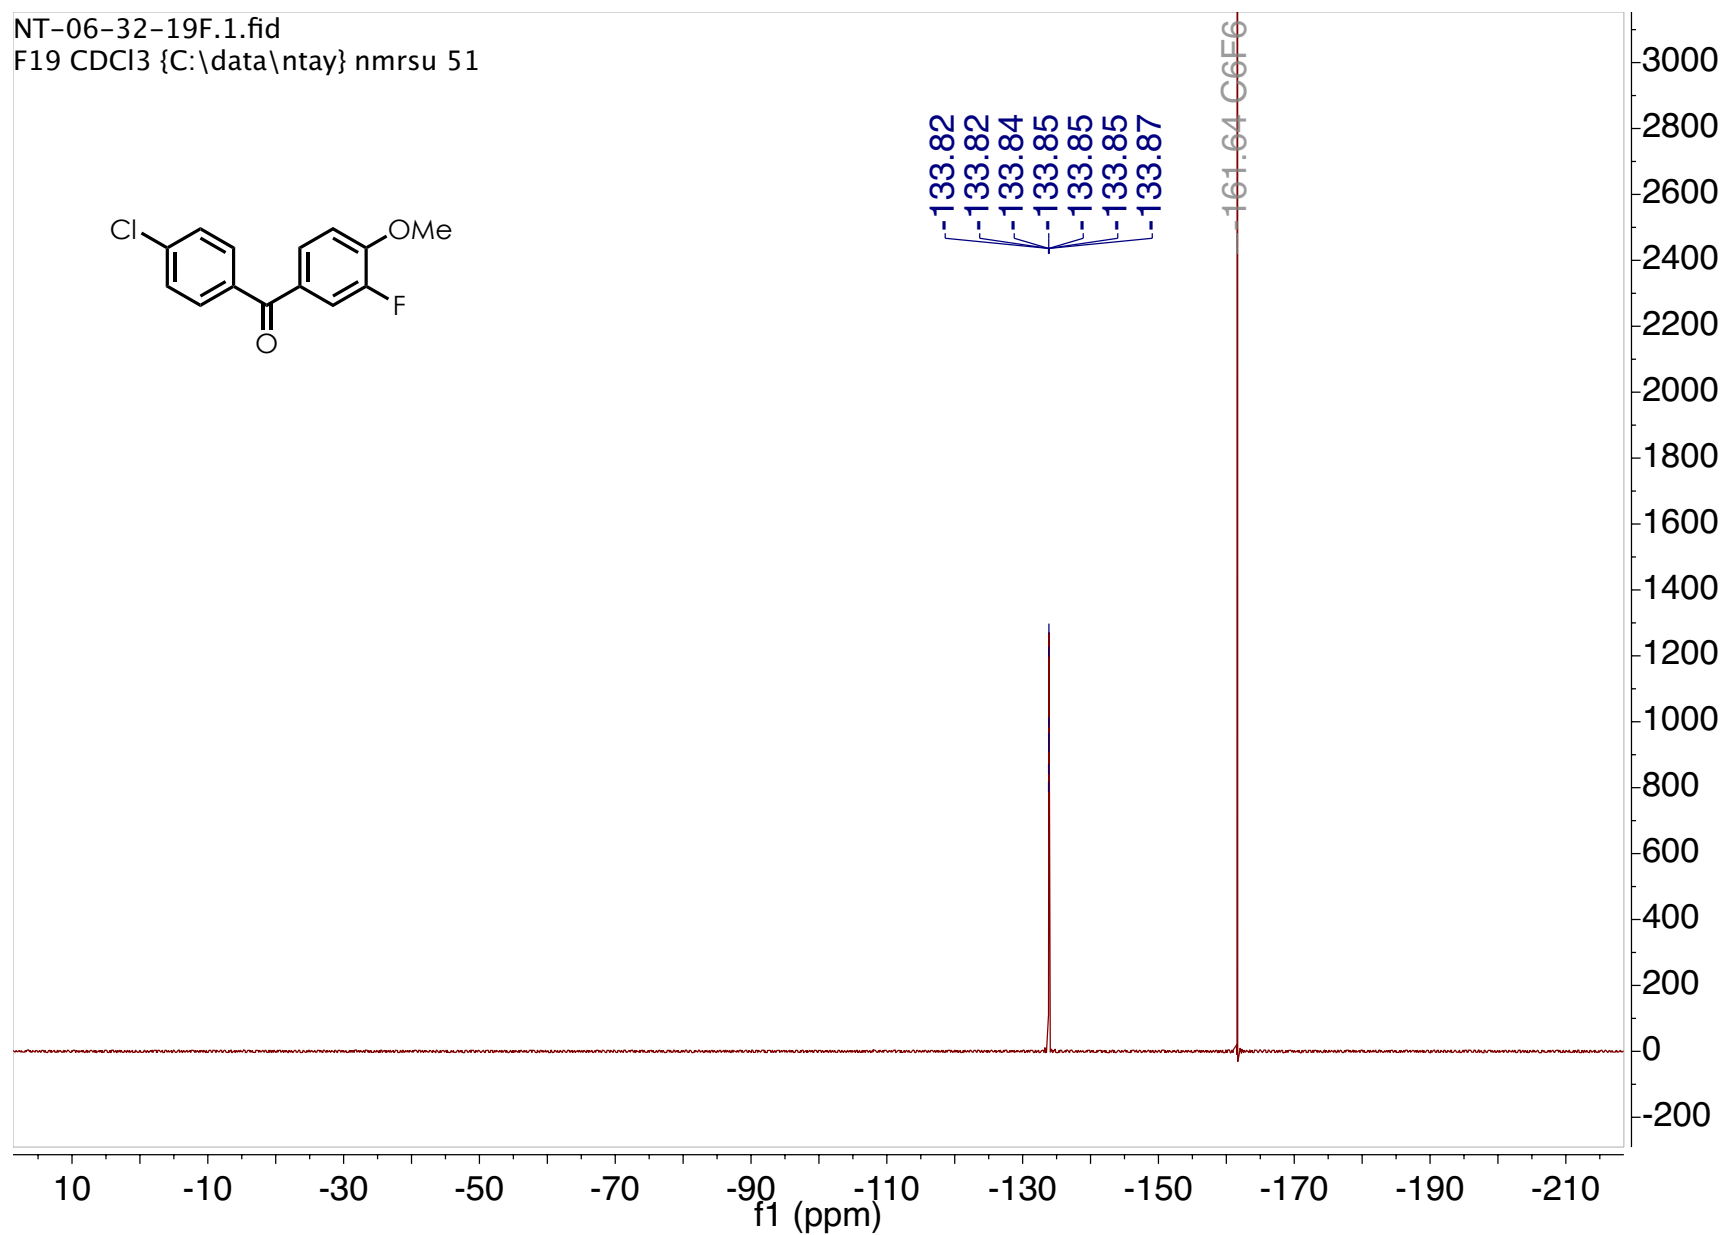

NT-06-34-1H.1.fid  
NT-06-34-1H

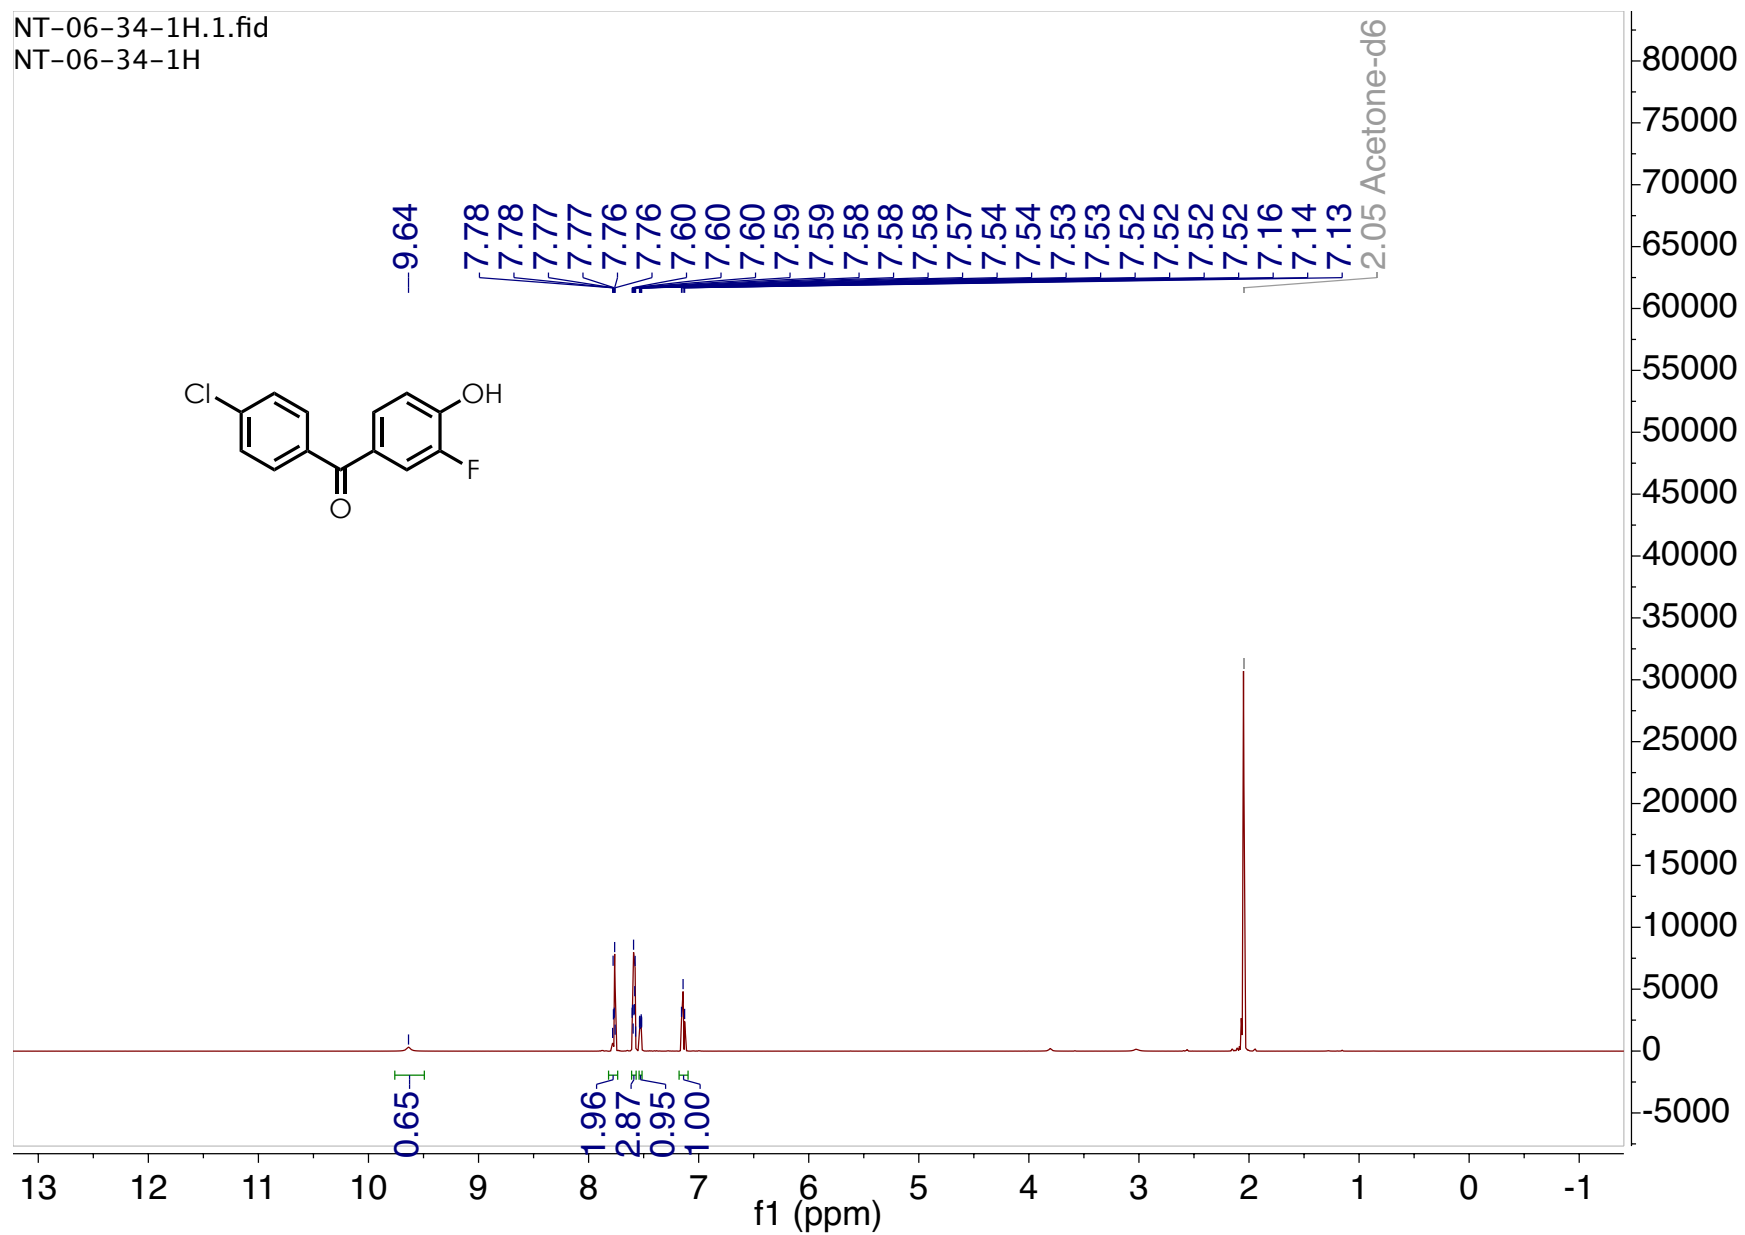

NT-0634-13C.1.fid

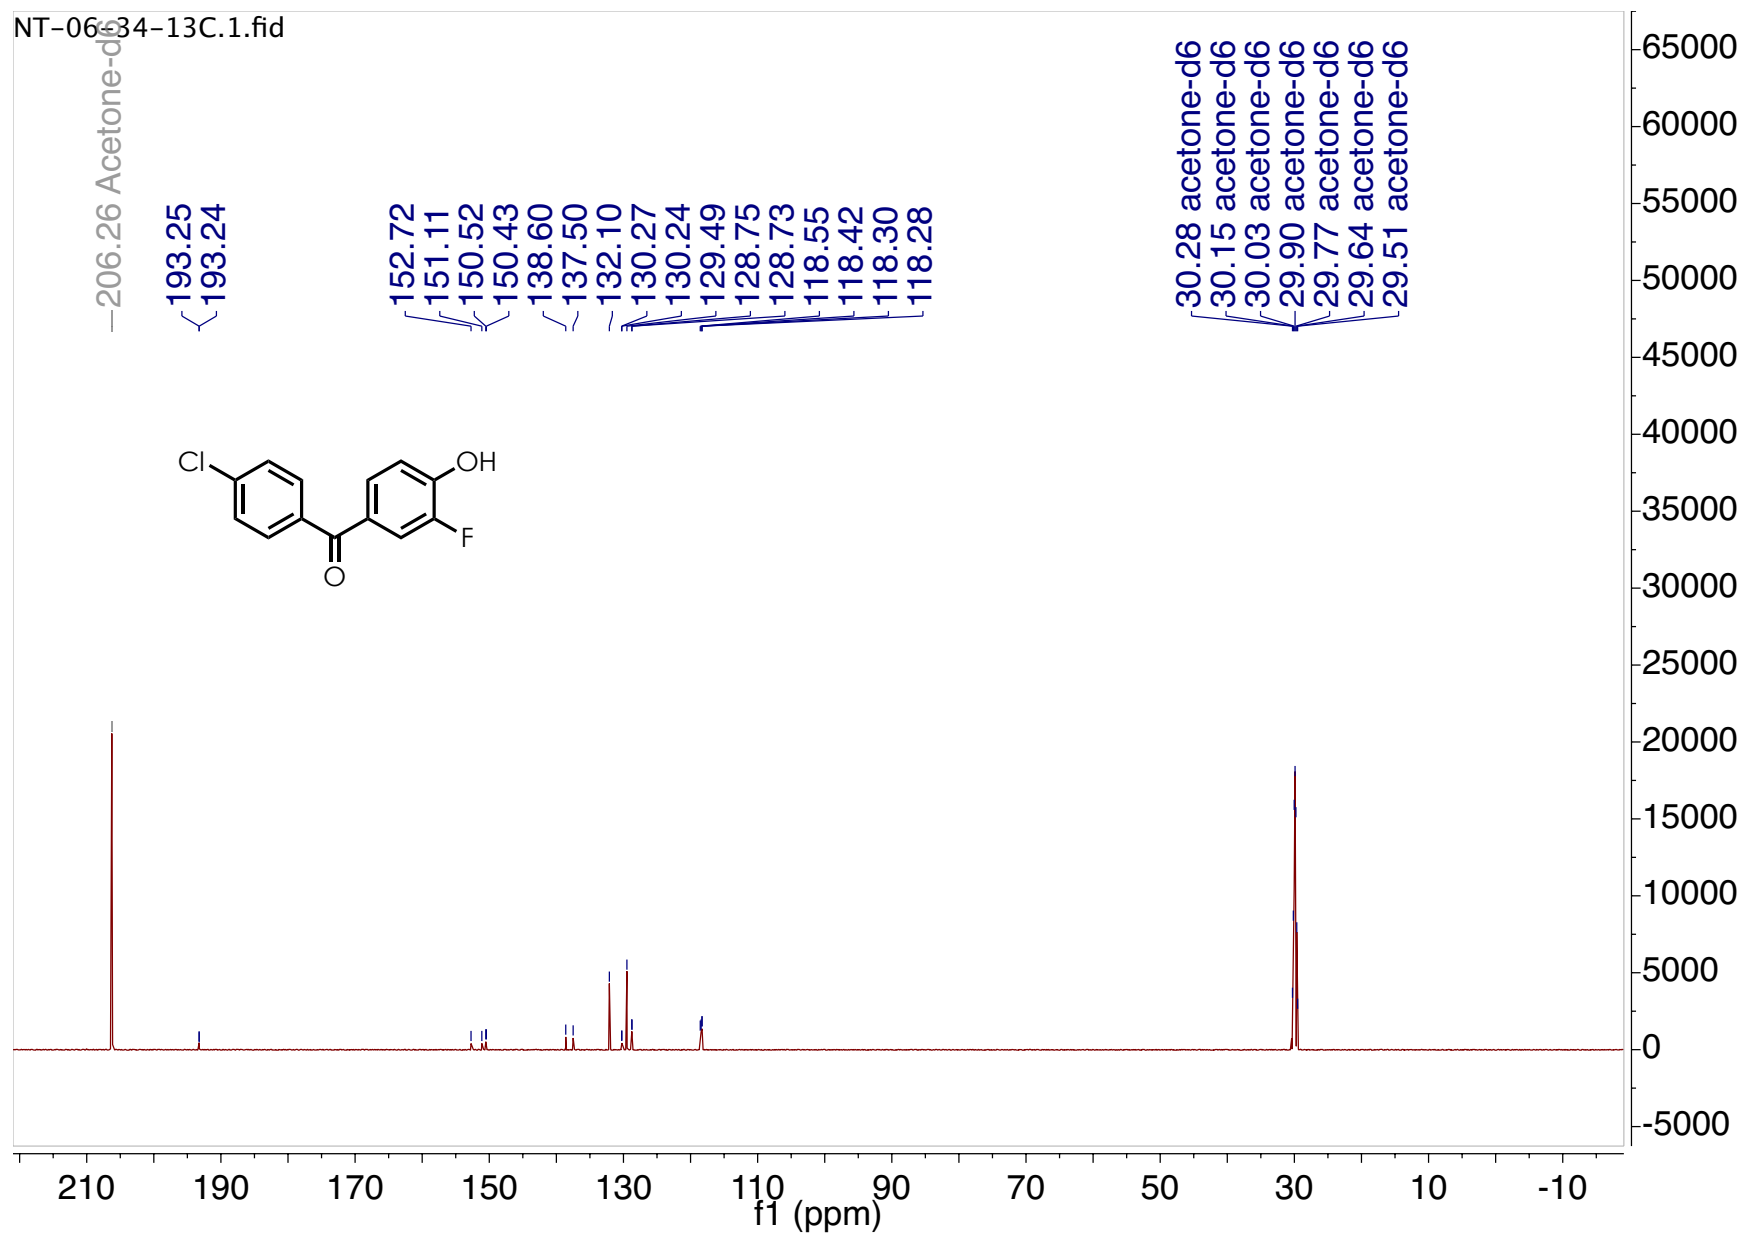

NT-06-34-19F.1.fid

F19 Acetone {C:\data\ntay} nmrsu 59

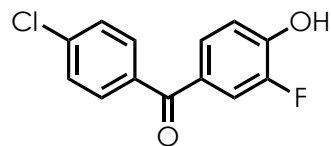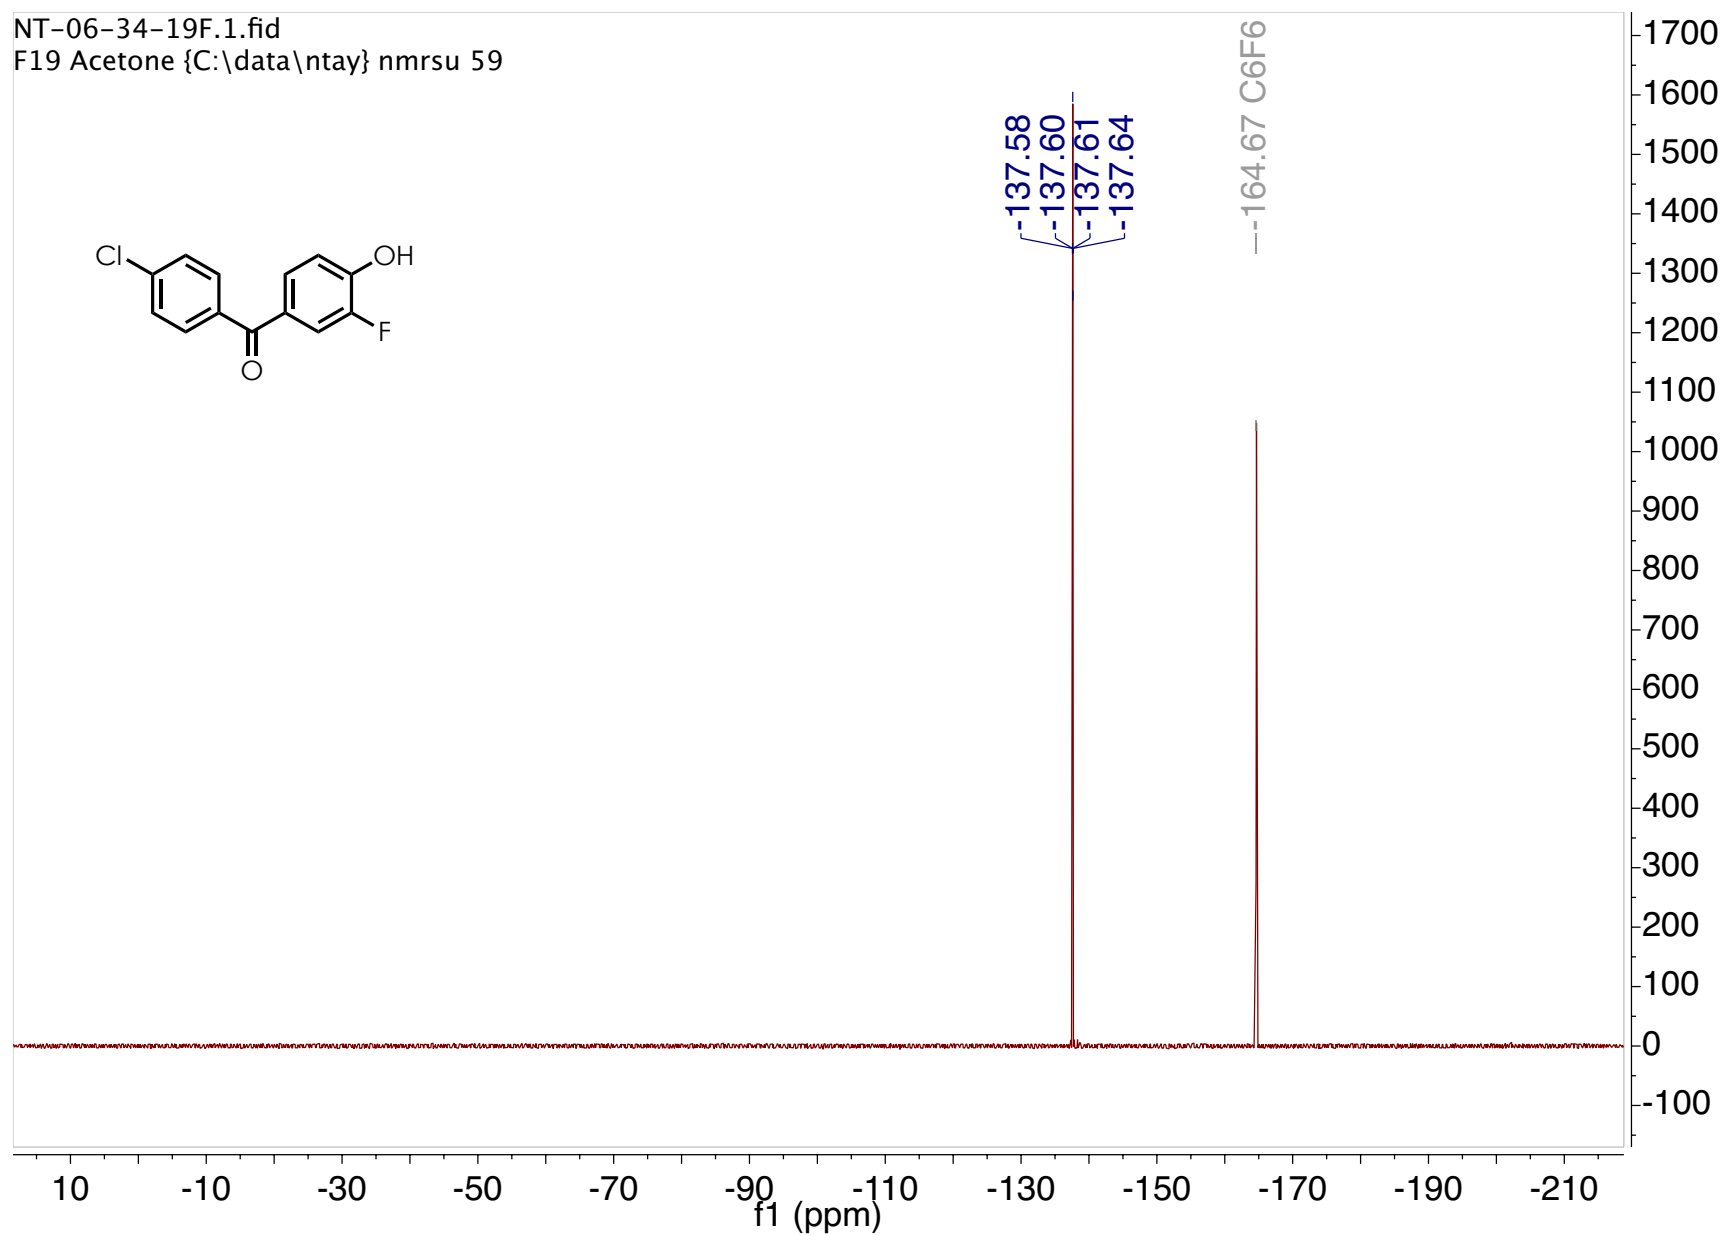

NT-06-35-1H.1.fid

NT-06-35-1H

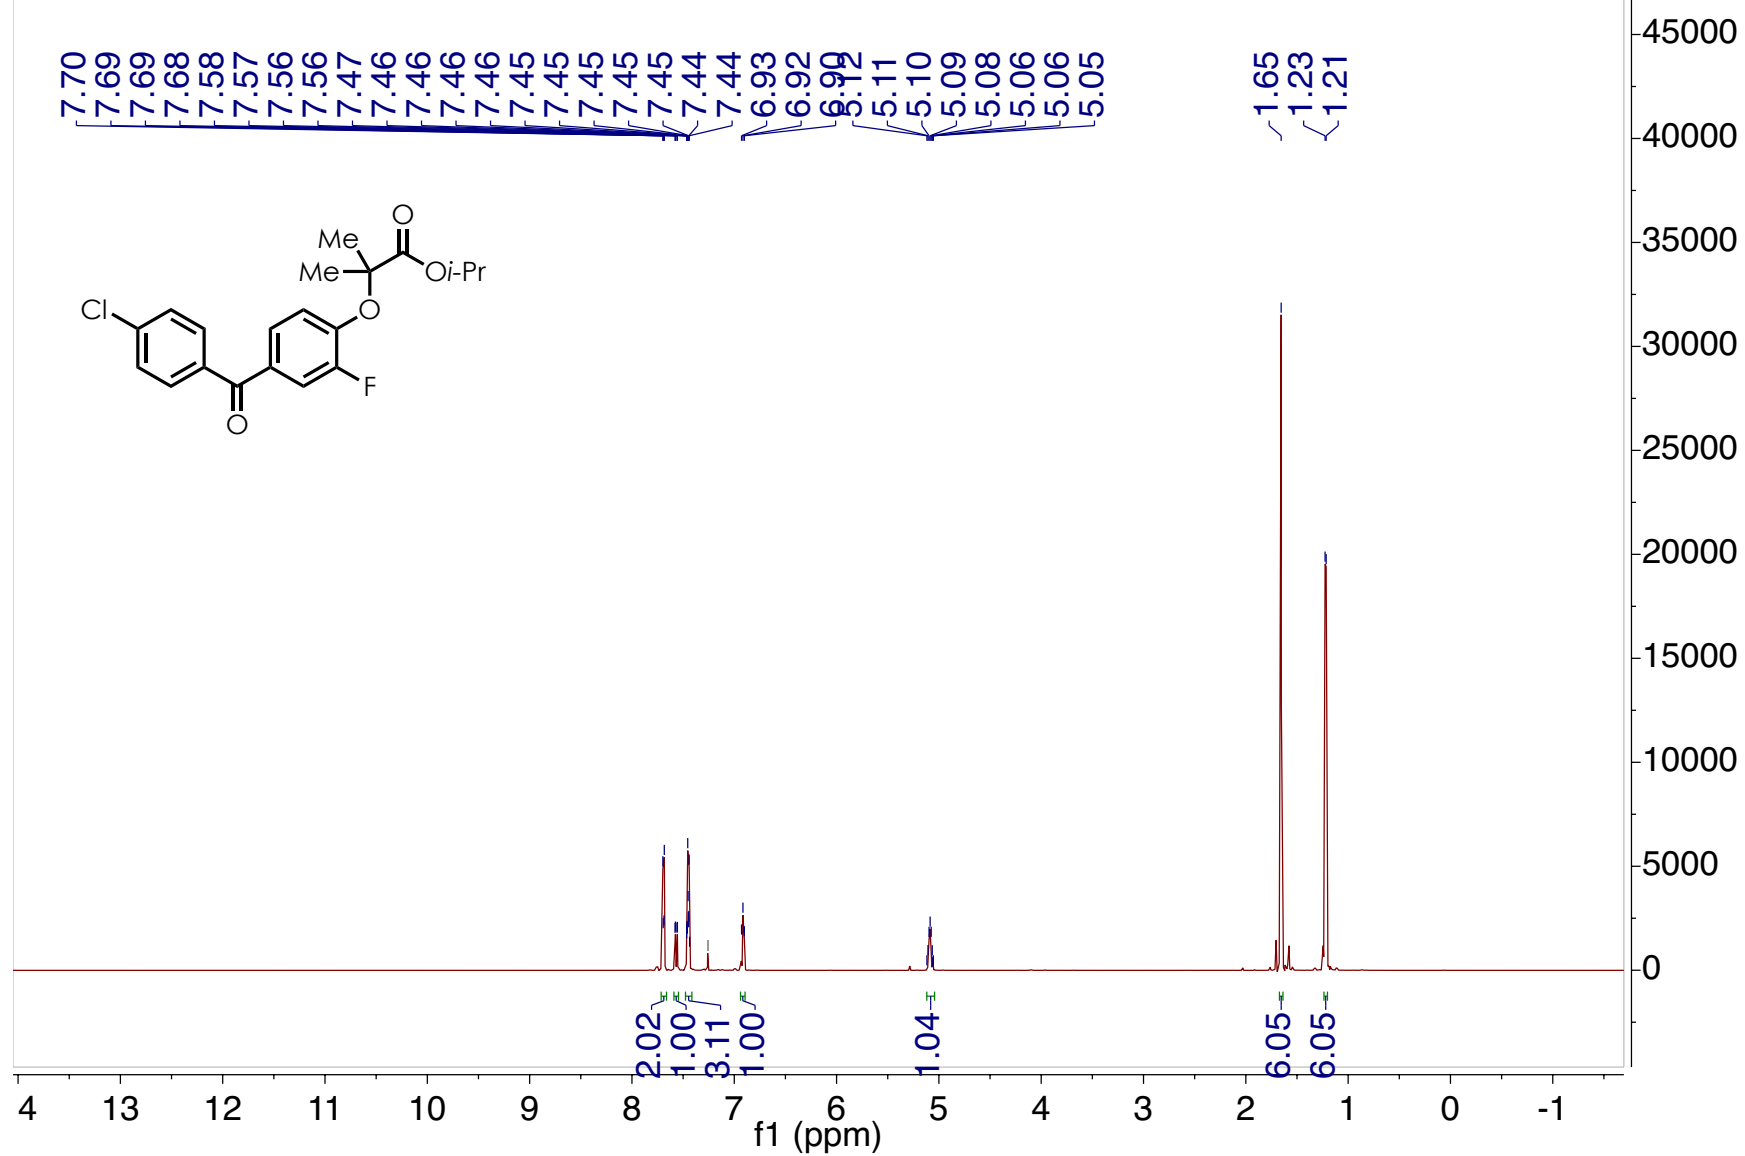

NT-06-35-13C.1.fid

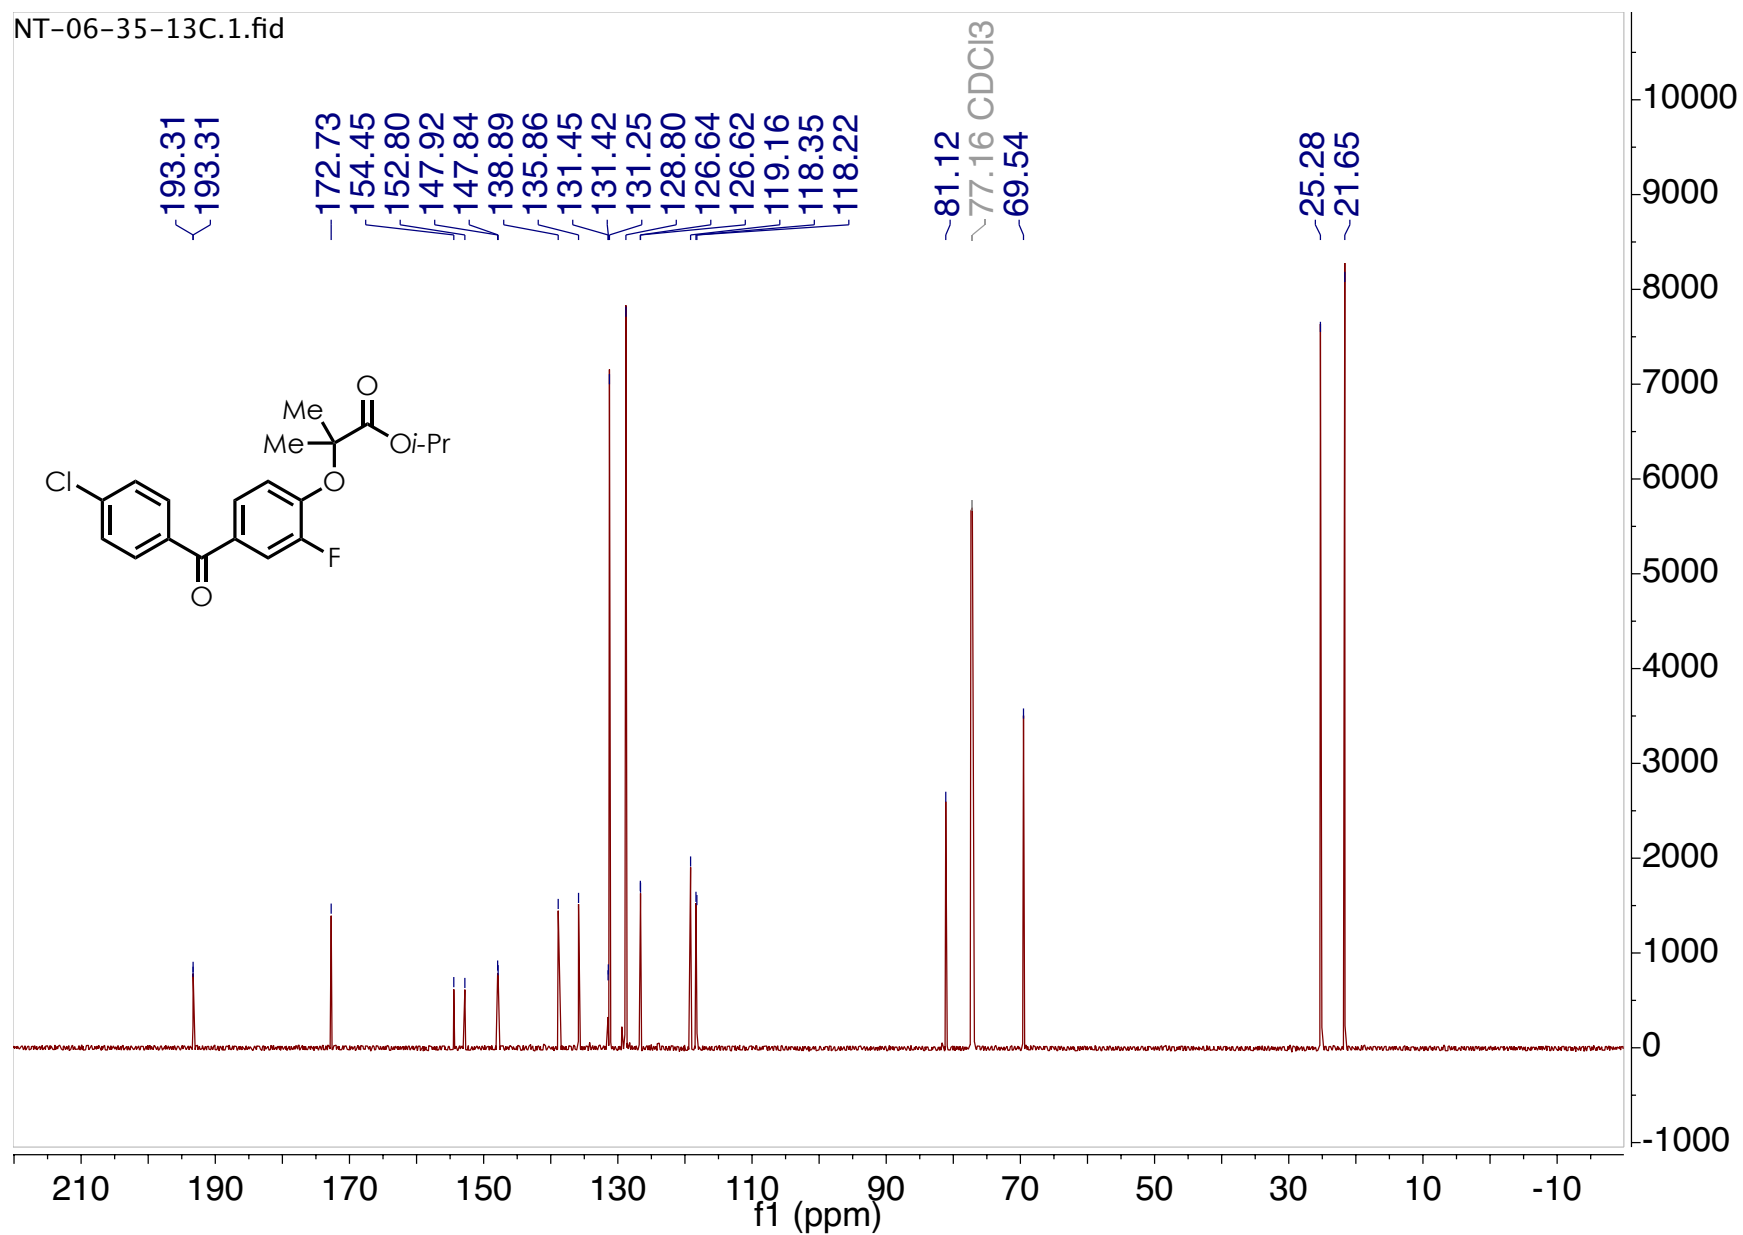

NT-06-35-19F.1.fid

F19 CDCl<sub>3</sub> {C:\data\ntay} nmrsu 52

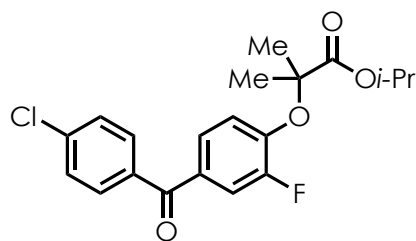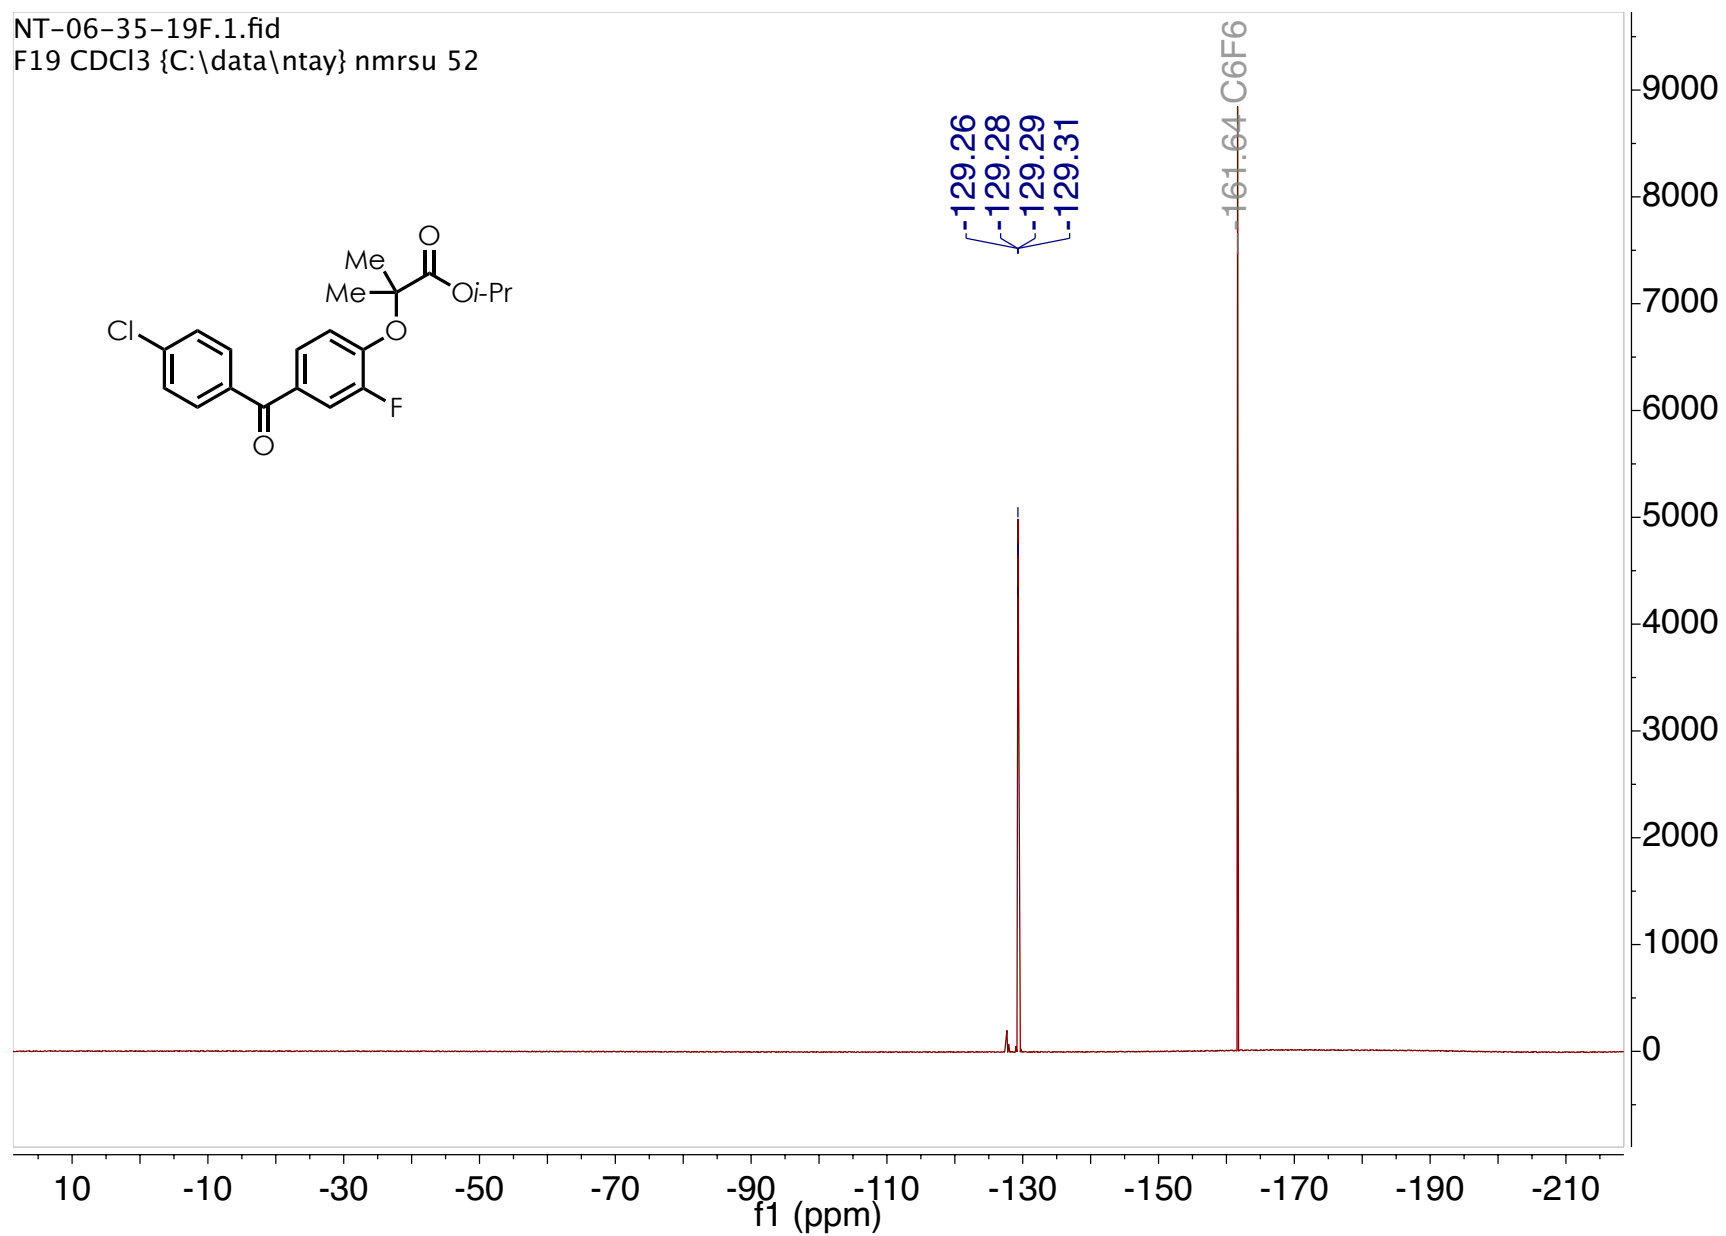

NT-05-300-1 2.1.fid  
Nicewicz  
5110718  
ntay  
NT-05-300-1

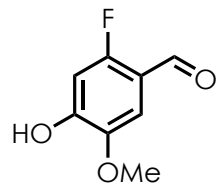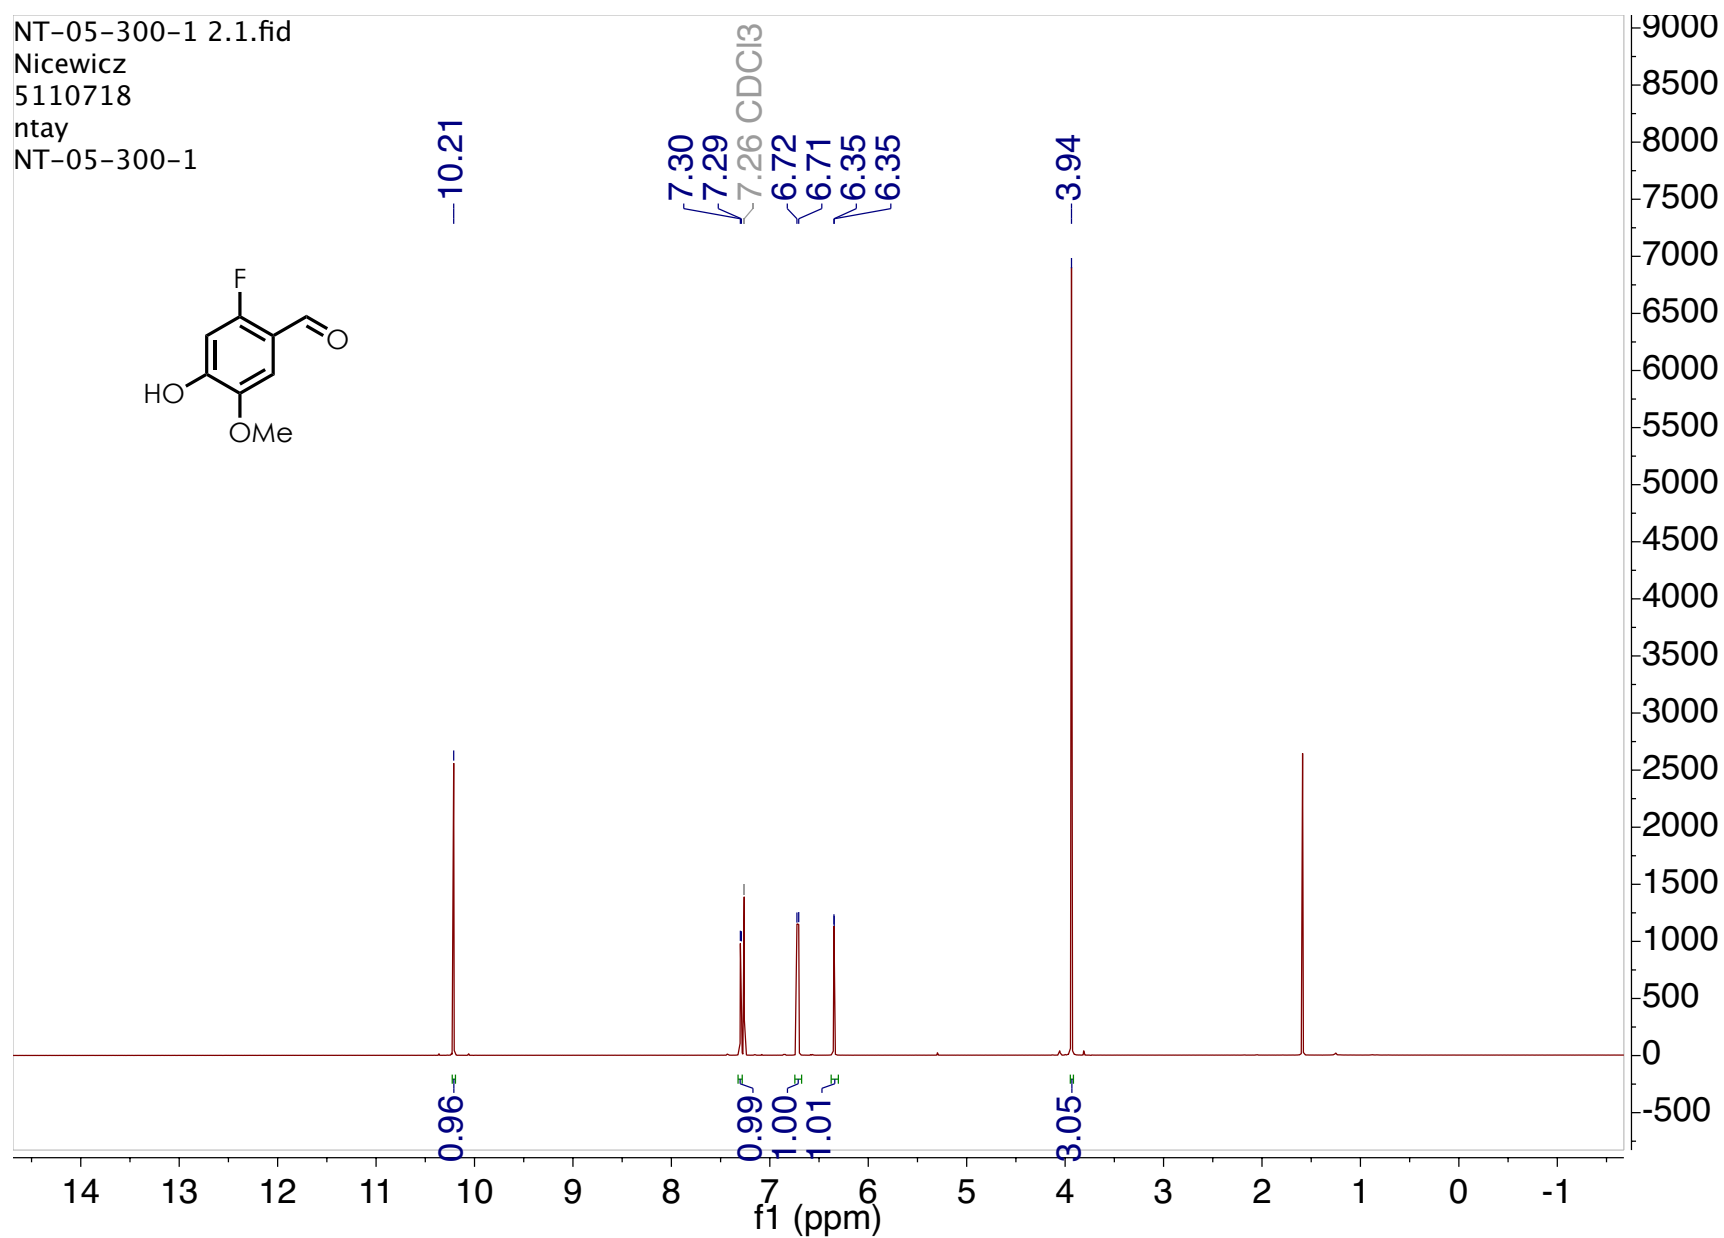

NT-05-300-1 3.2.fid

Nicewicz

5110718

ntay

NT-05-300-1

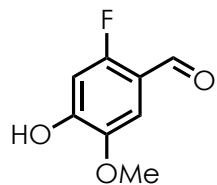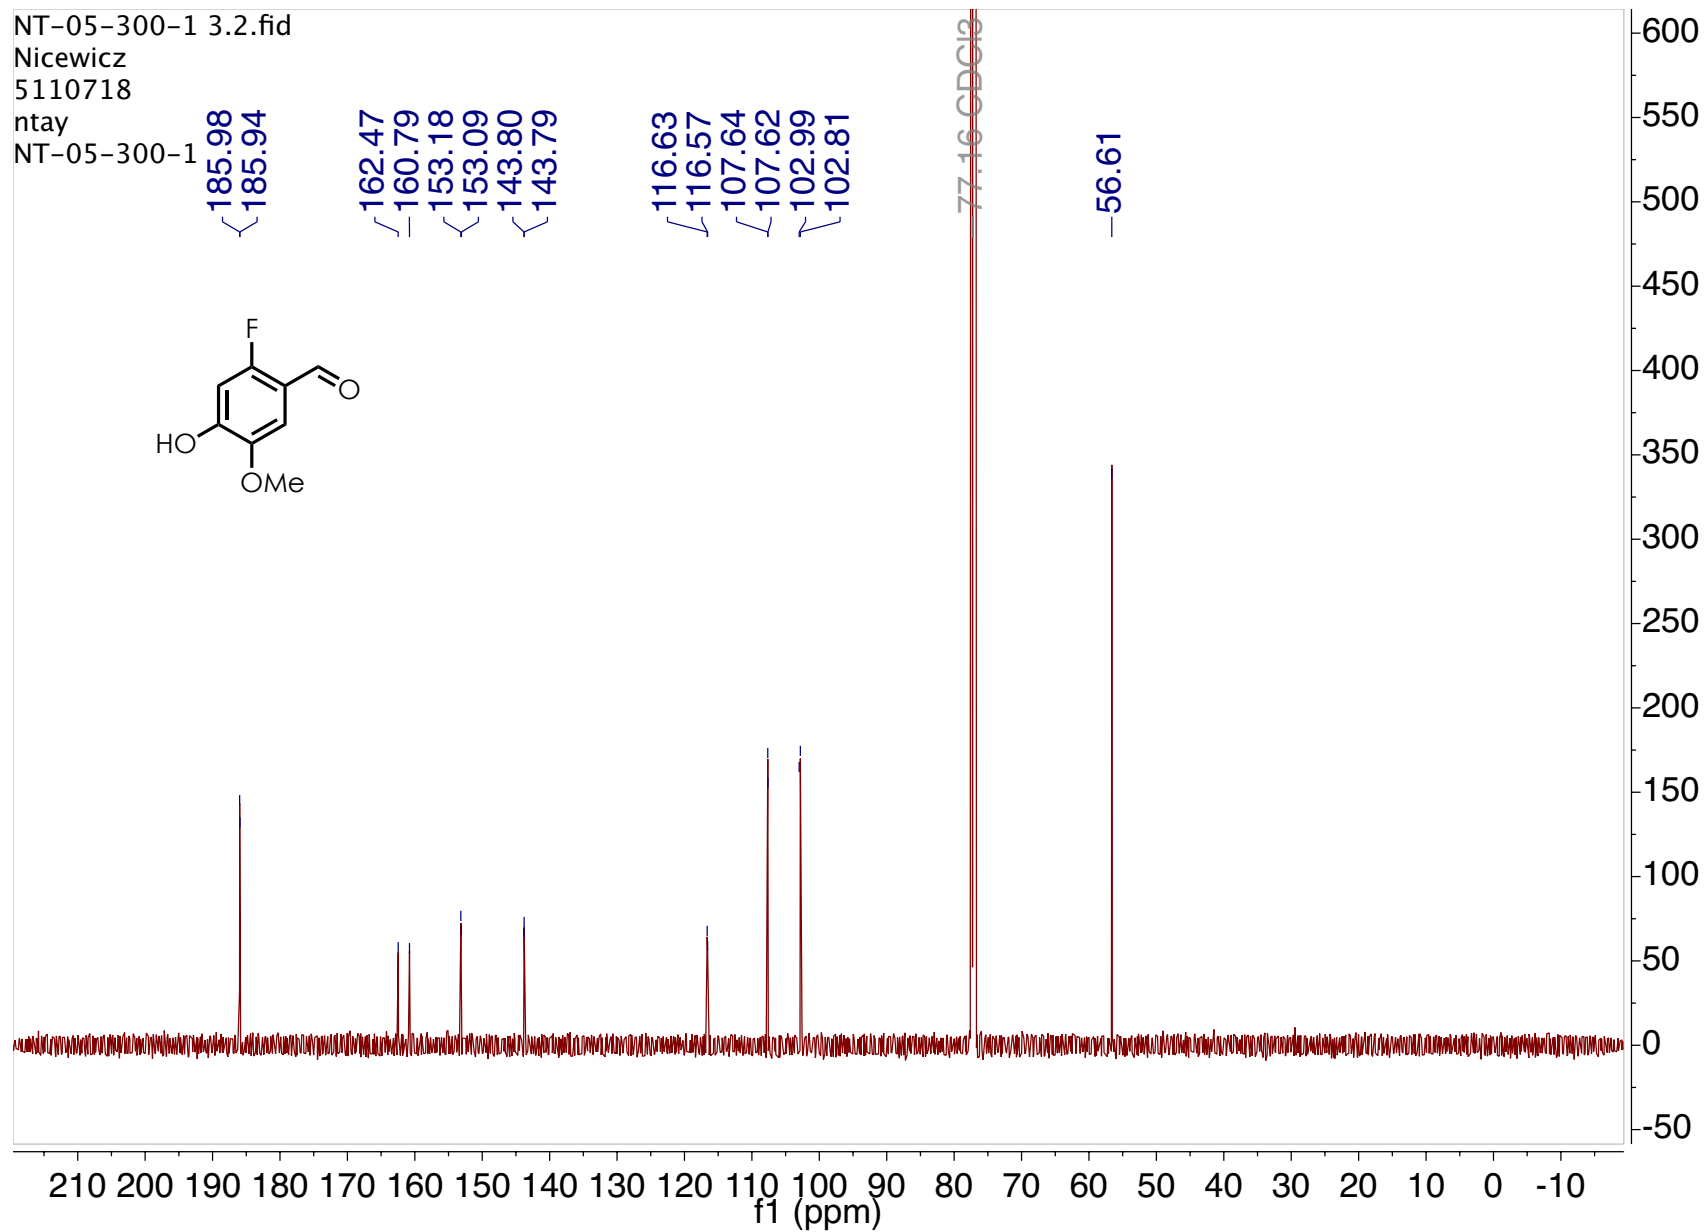

NT-05-300-1-19F 3.3.fid  
F19 CDCl3 {C:\data\ntay} nmrsu 9

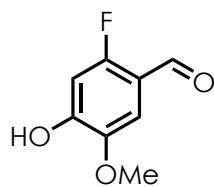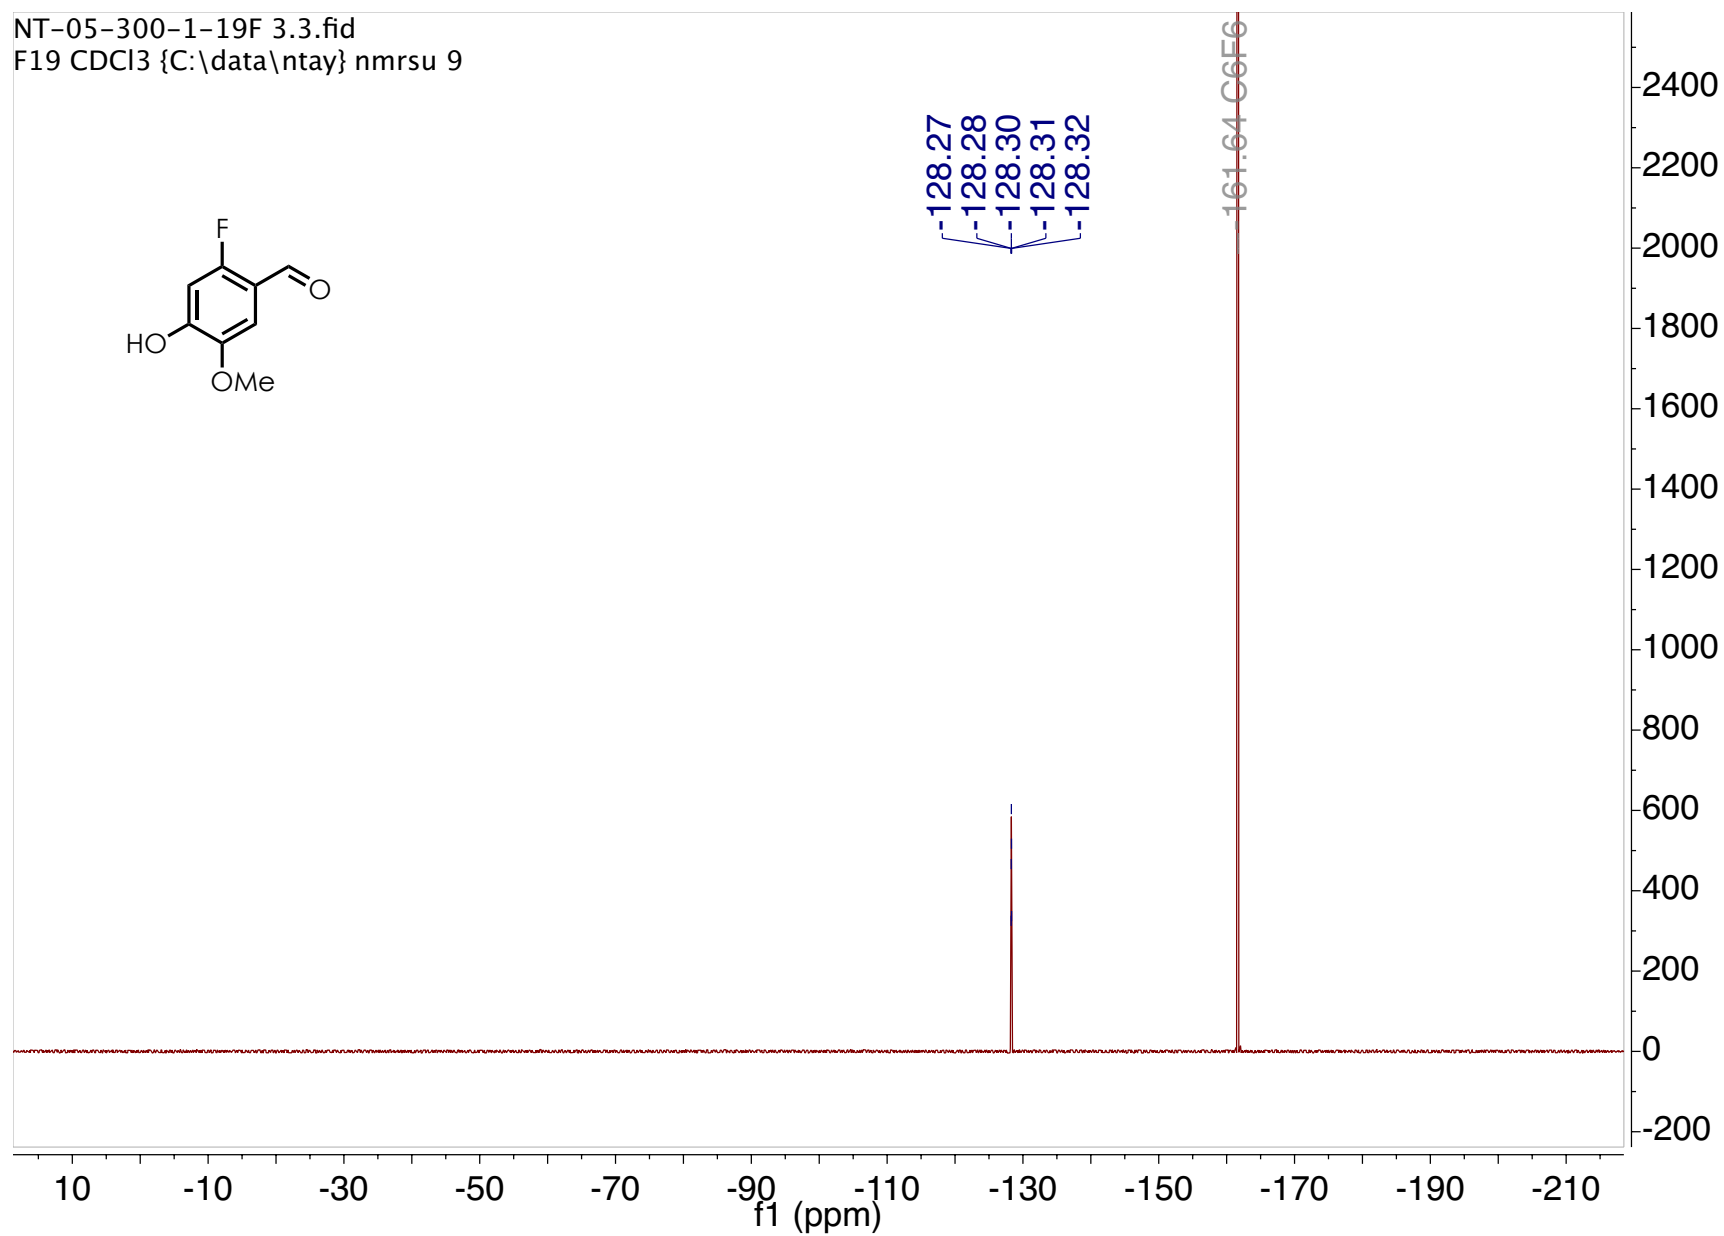

NT-06-15.1.fid  
 Nicewicz  
 5110718  
 ntay  
 NT-06-15

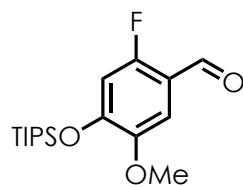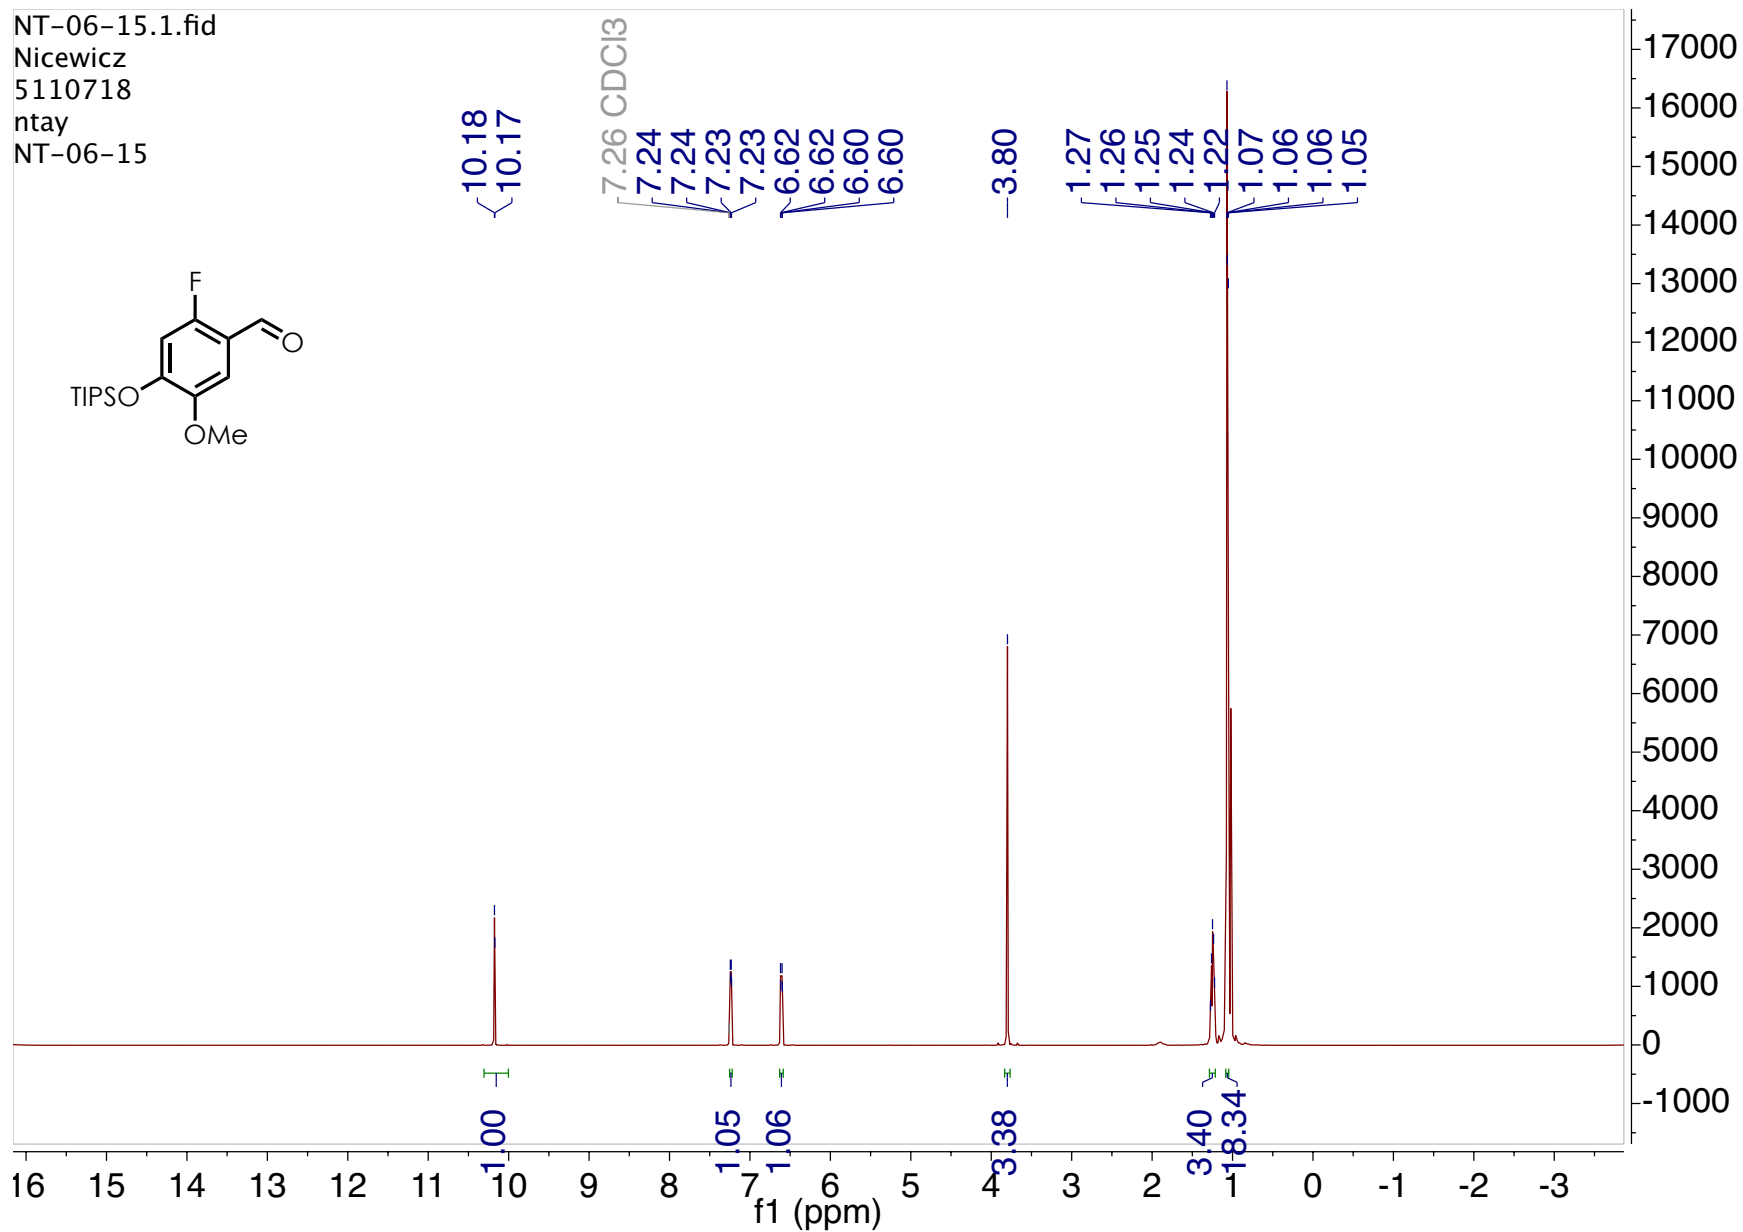

NT-06-15 2.2.fid

Nicewicz

5110718

ntay

NT-06-15

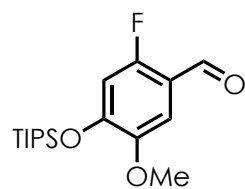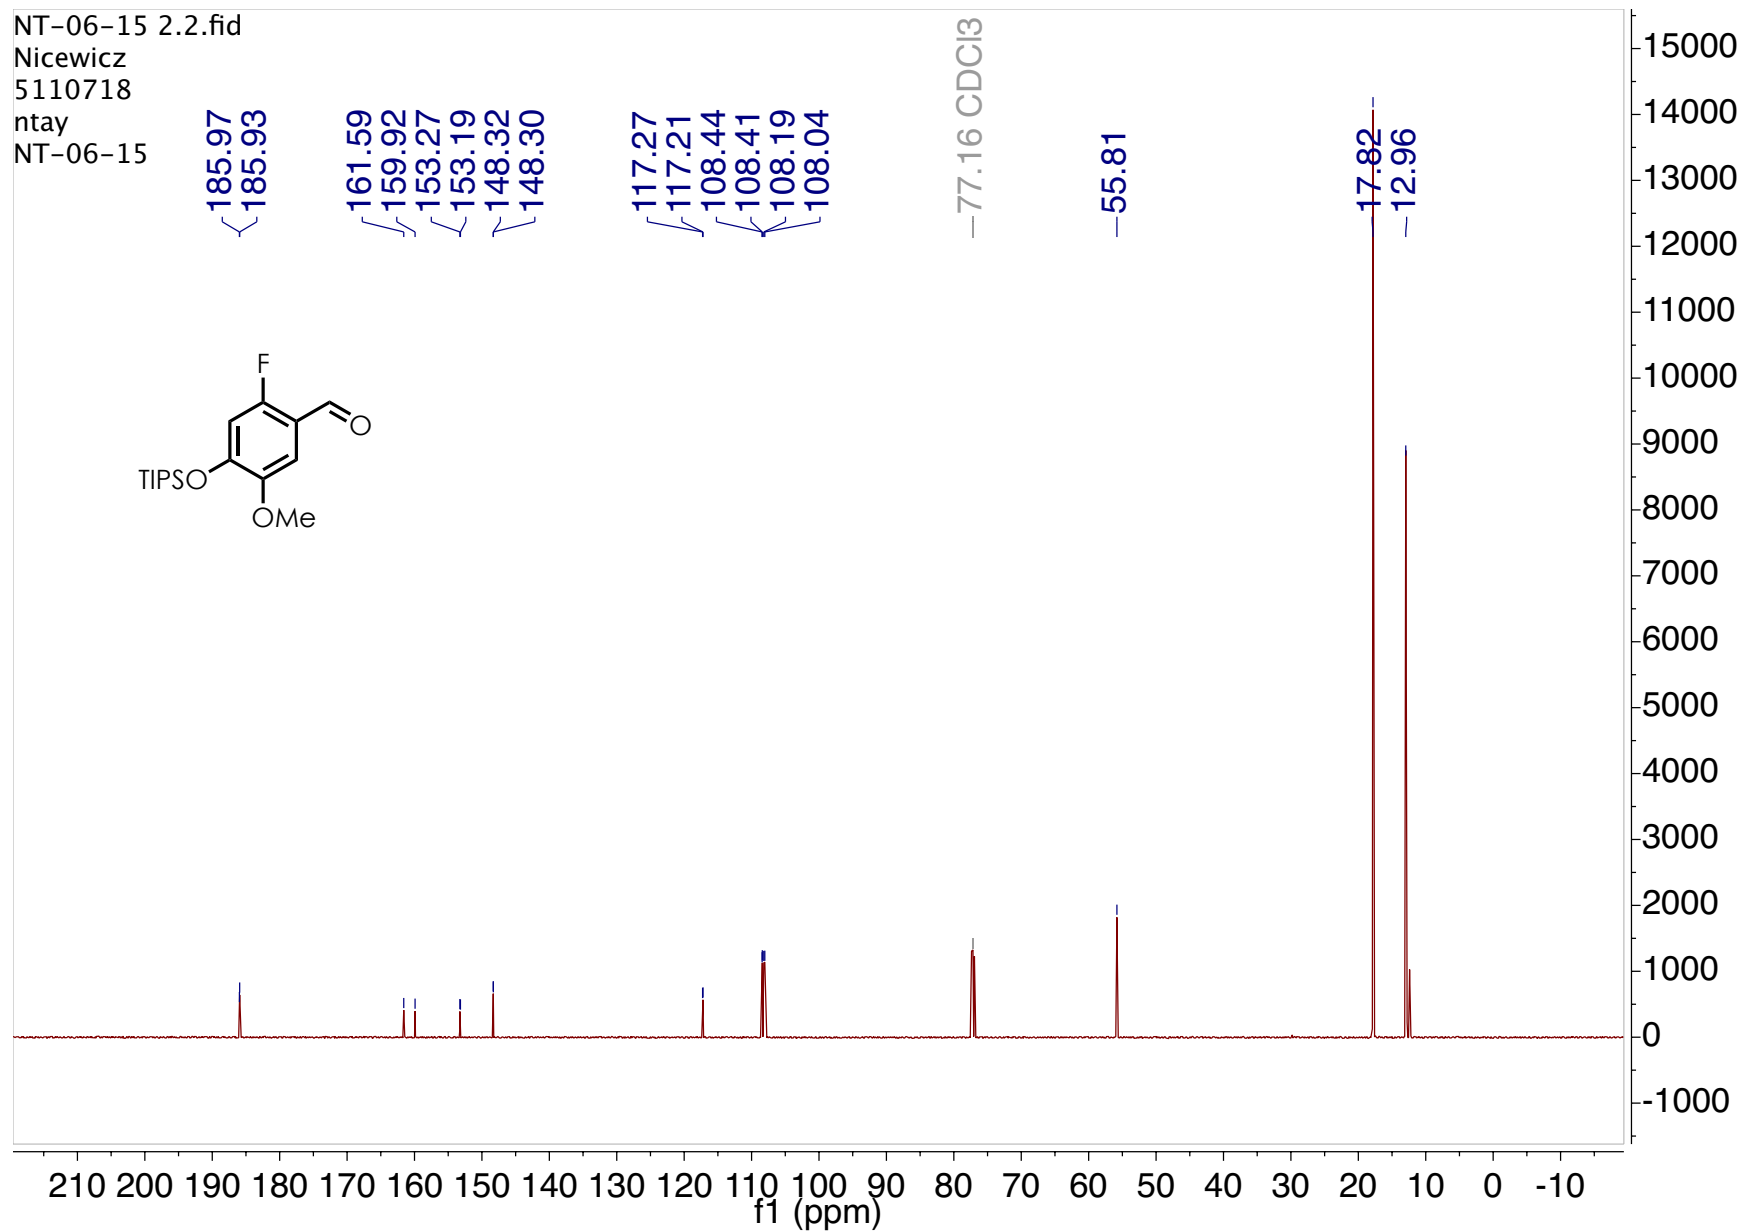

NT-06-15-19F.1.fid

F19 CDCl<sub>3</sub> {C:\data\ntay} nmrsu 44

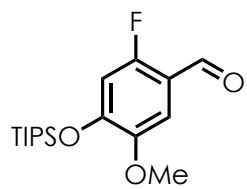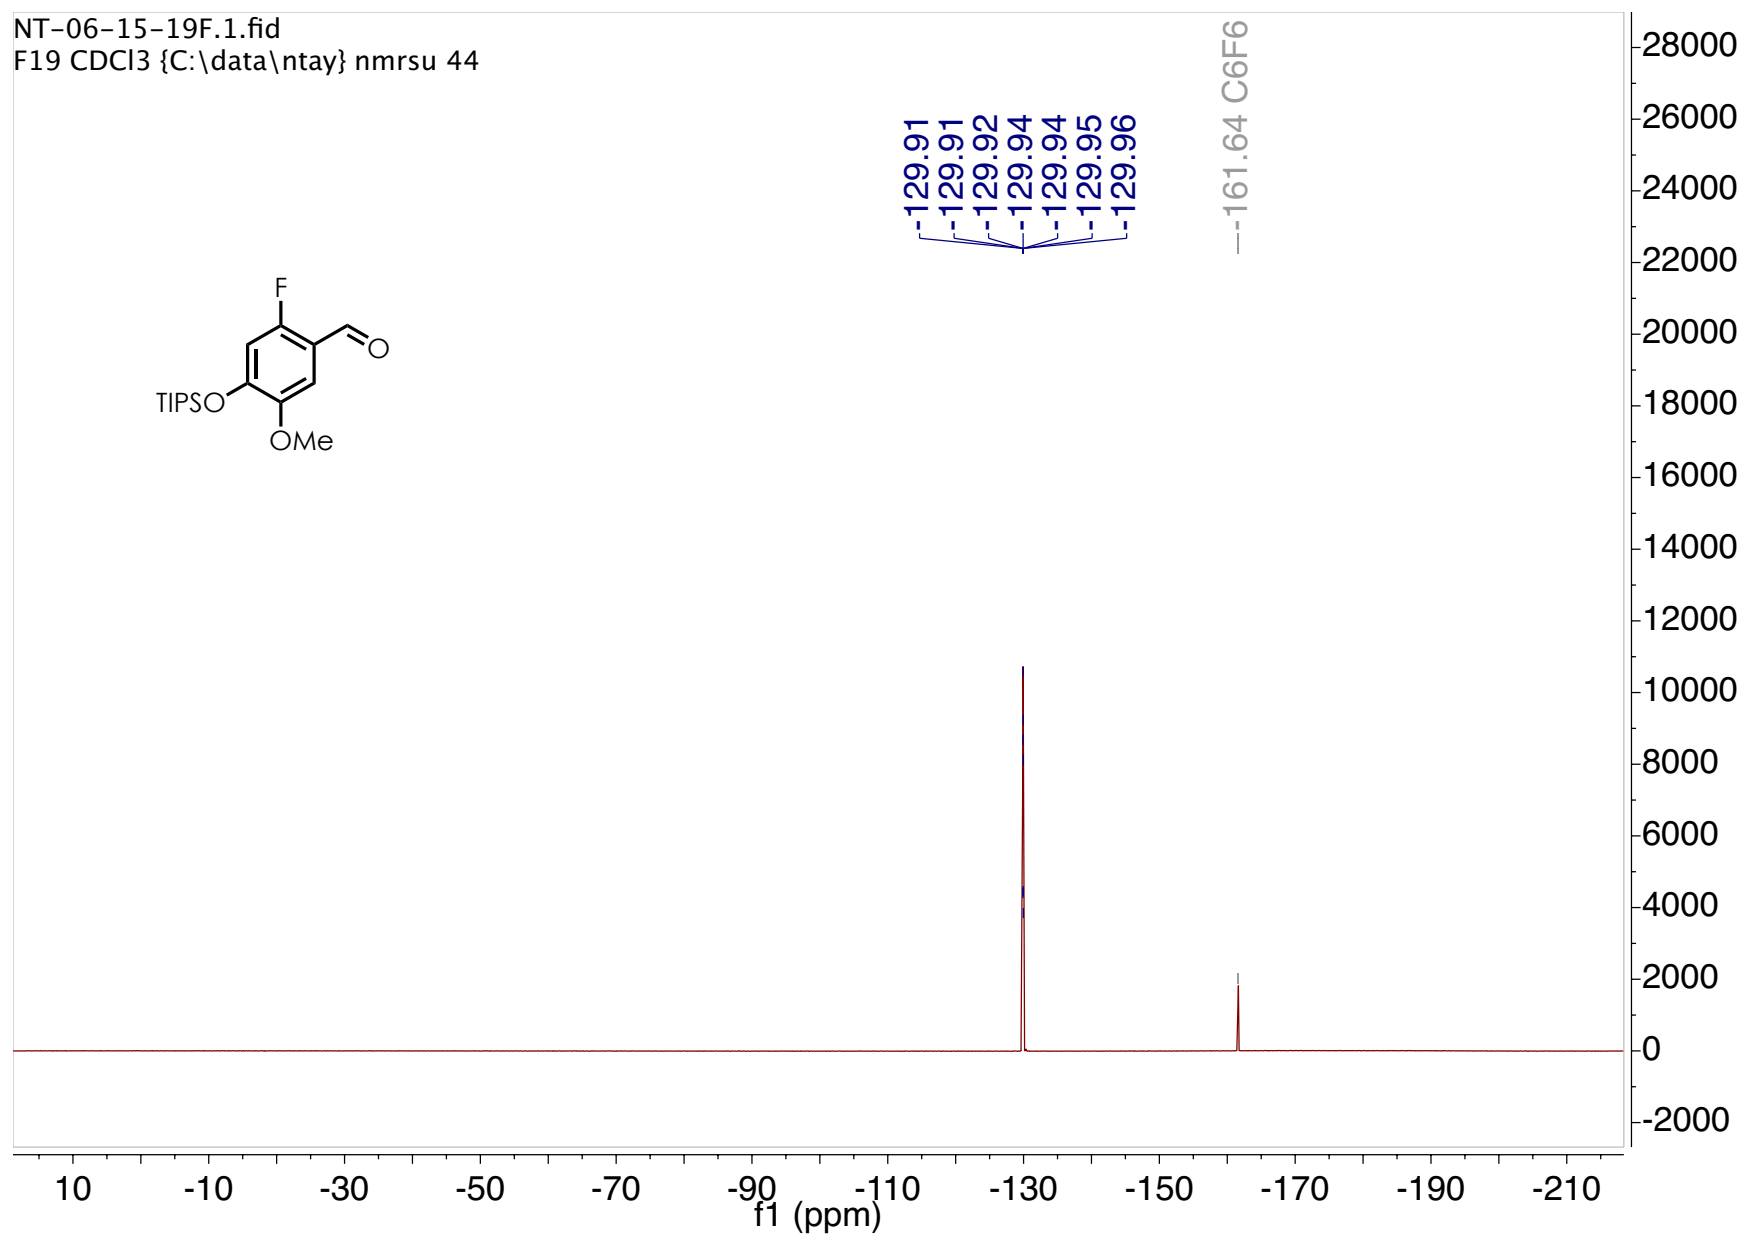

NT-06-16.1.fid  
 Nicewicz  
 5110718  
 ntay  
 NT-06-16

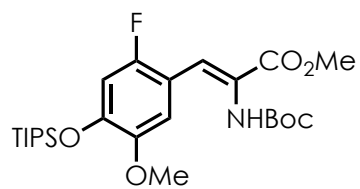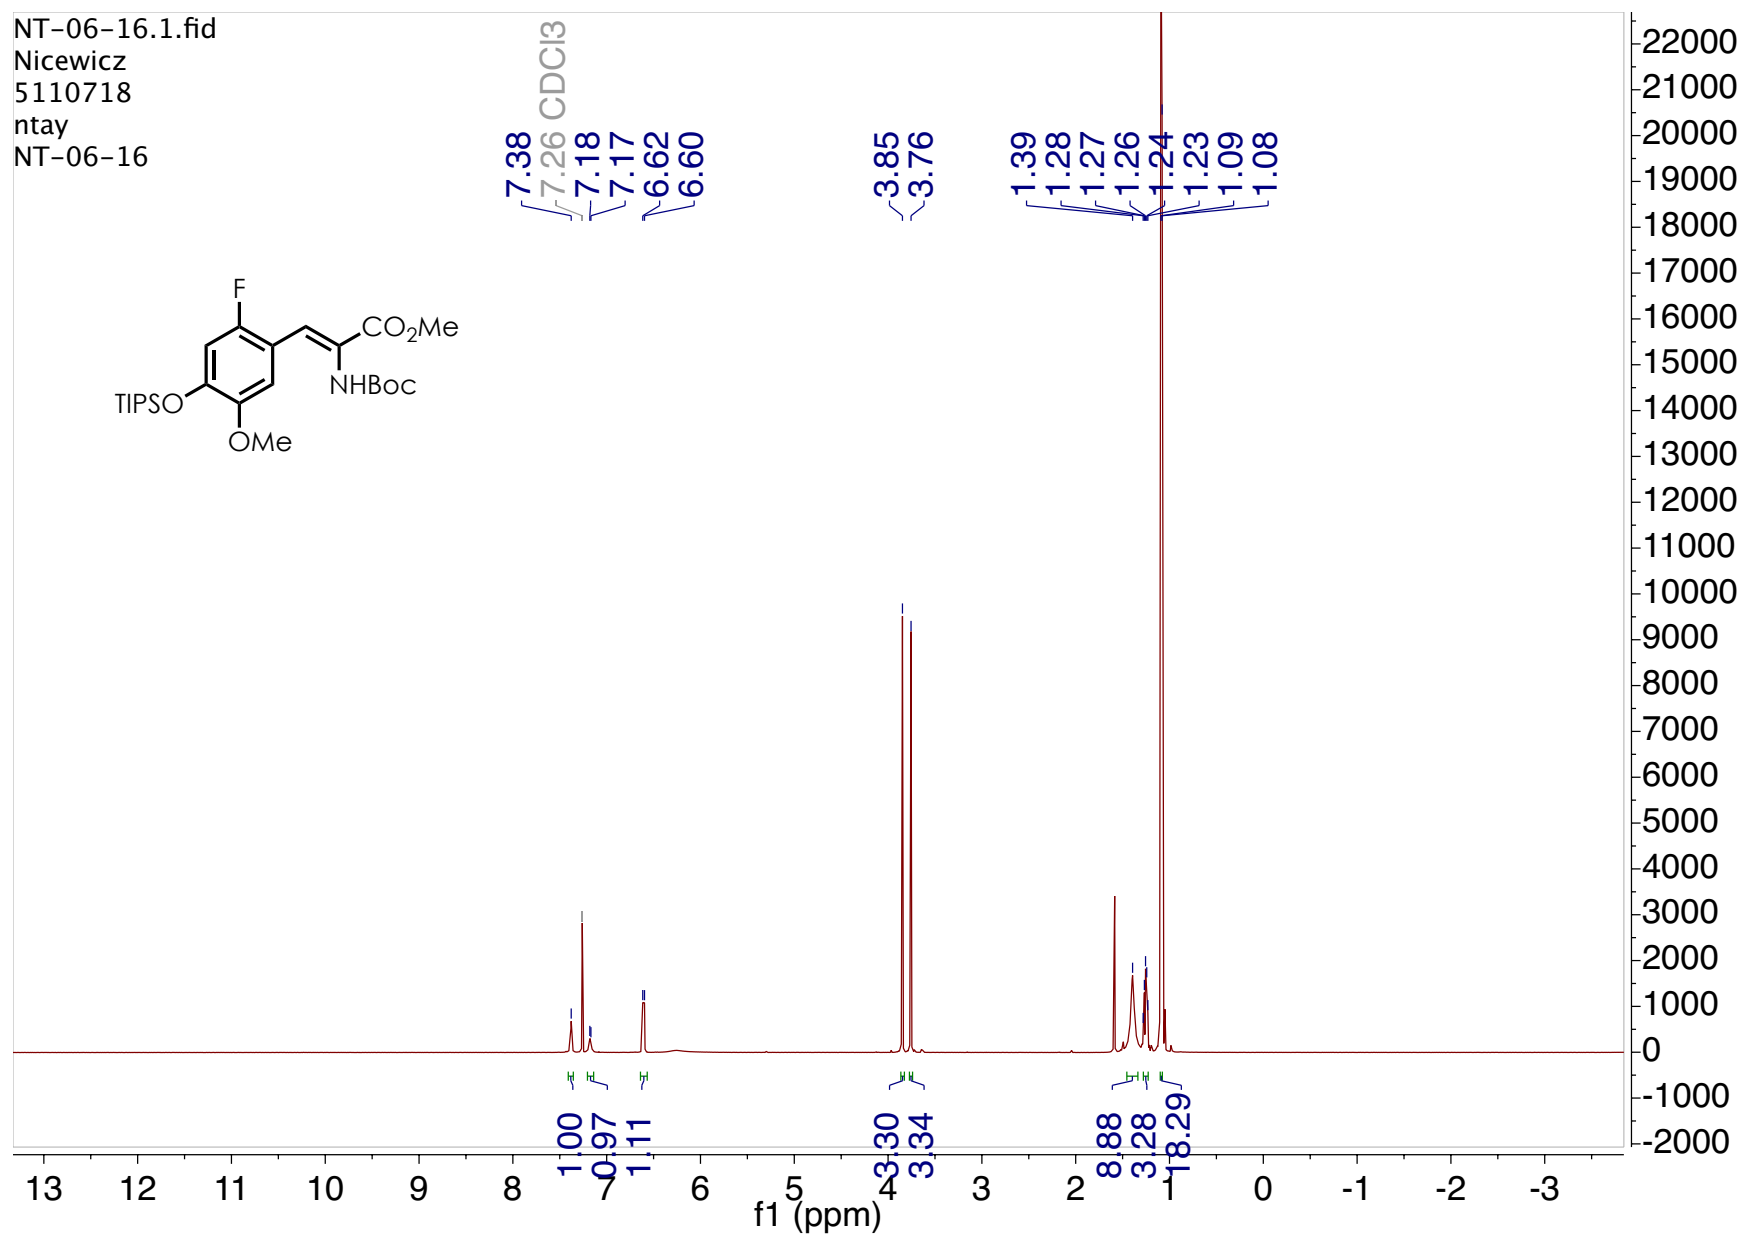

NT-06-16-13C.1.fid

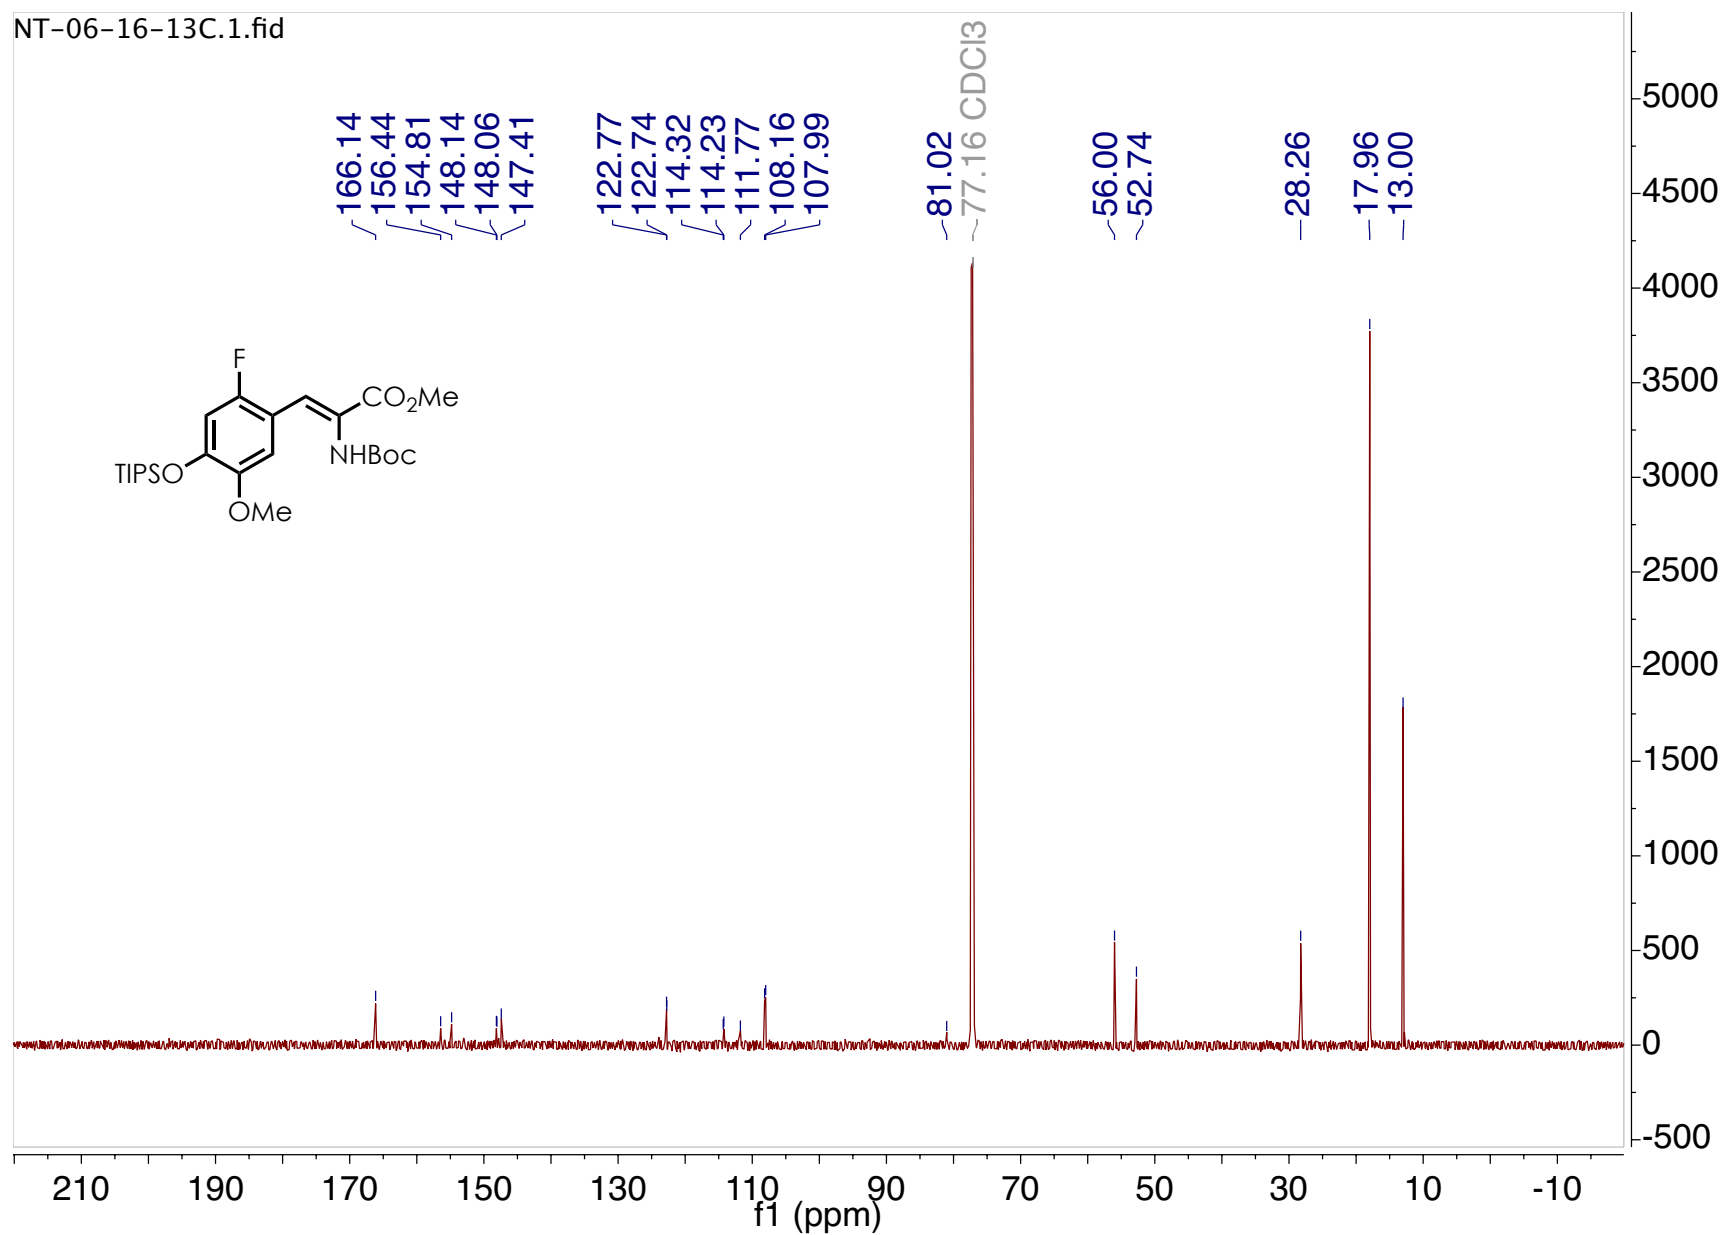

NT-06-16-19F 2.1.fid  
F19 CDCl3 {C:\data\ntay} nmrsu 58

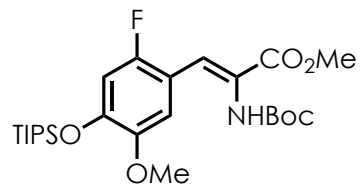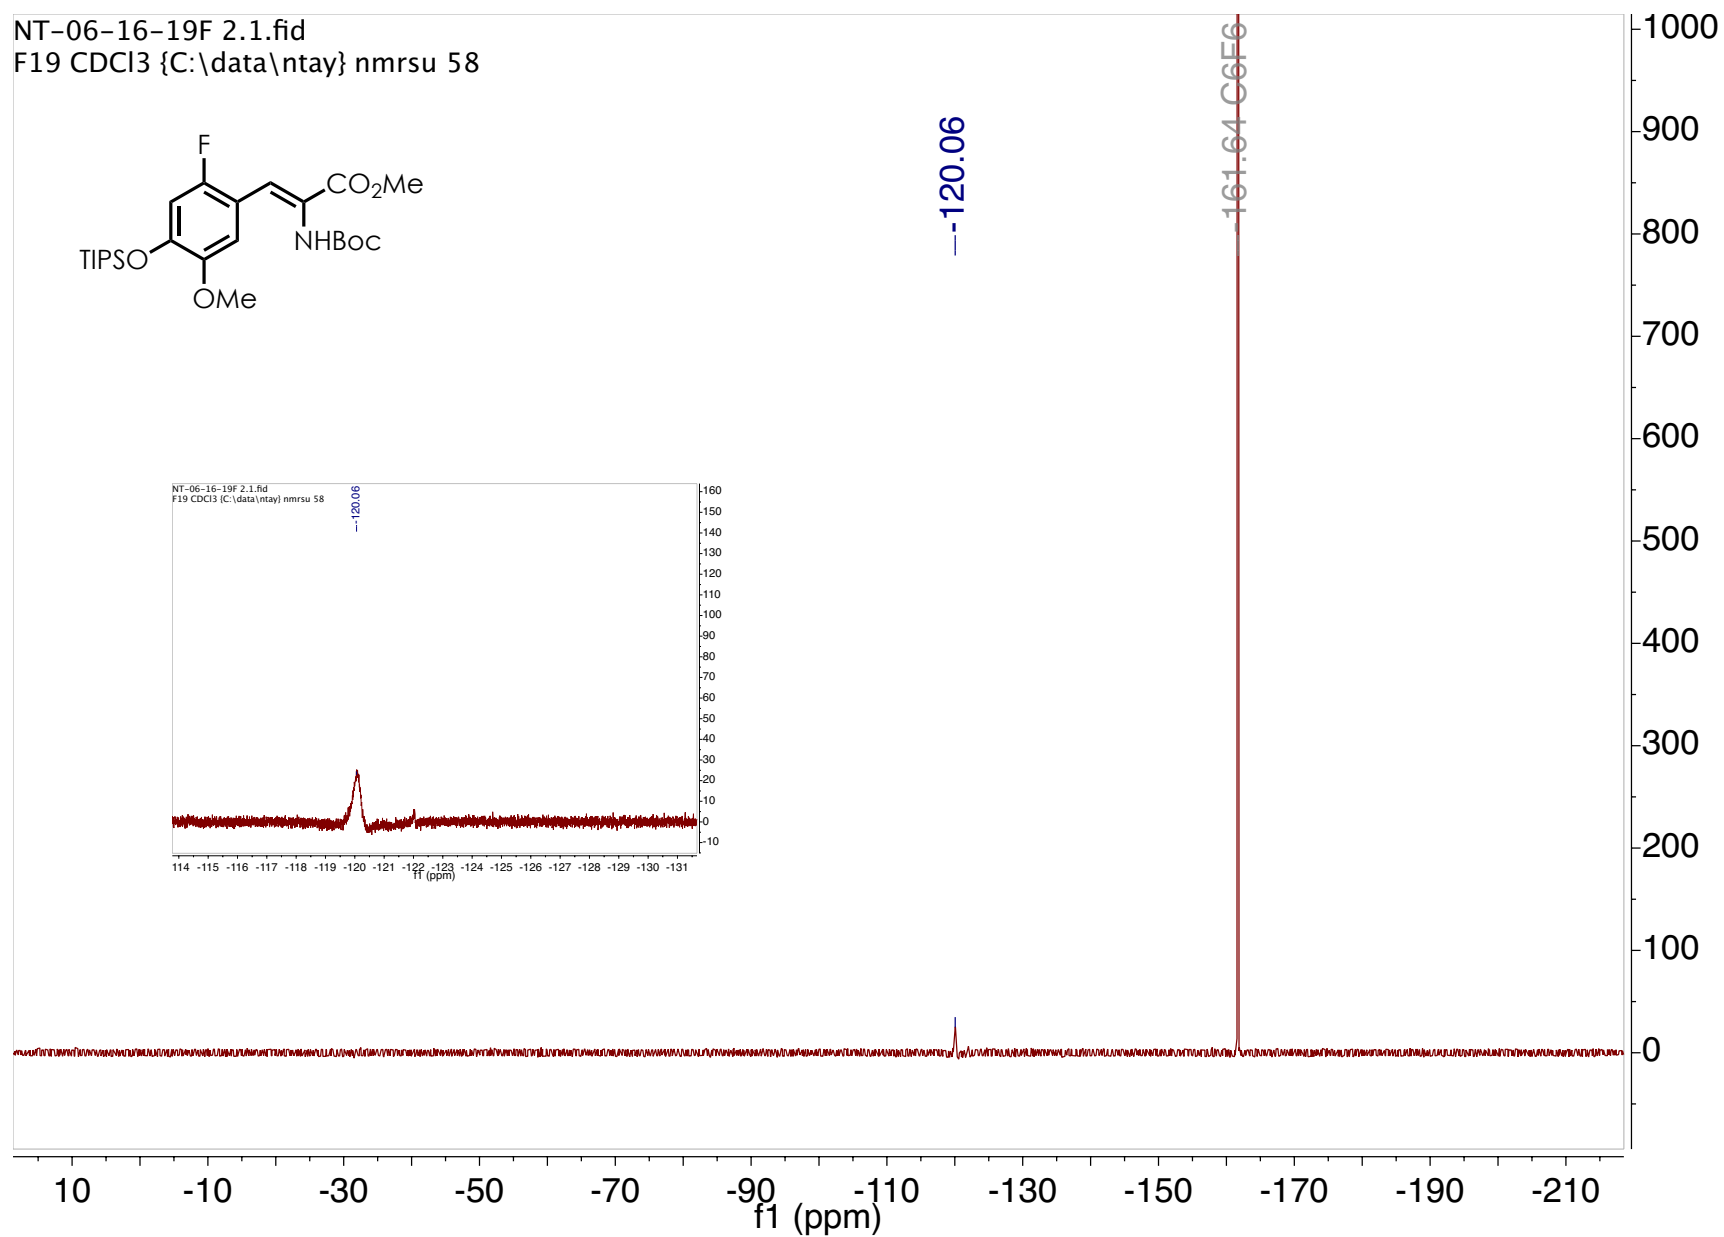

NT-06-19.1.fid  
 Nicewicz  
 5110718  
 ntay  
 NT-06-19

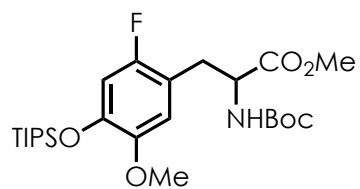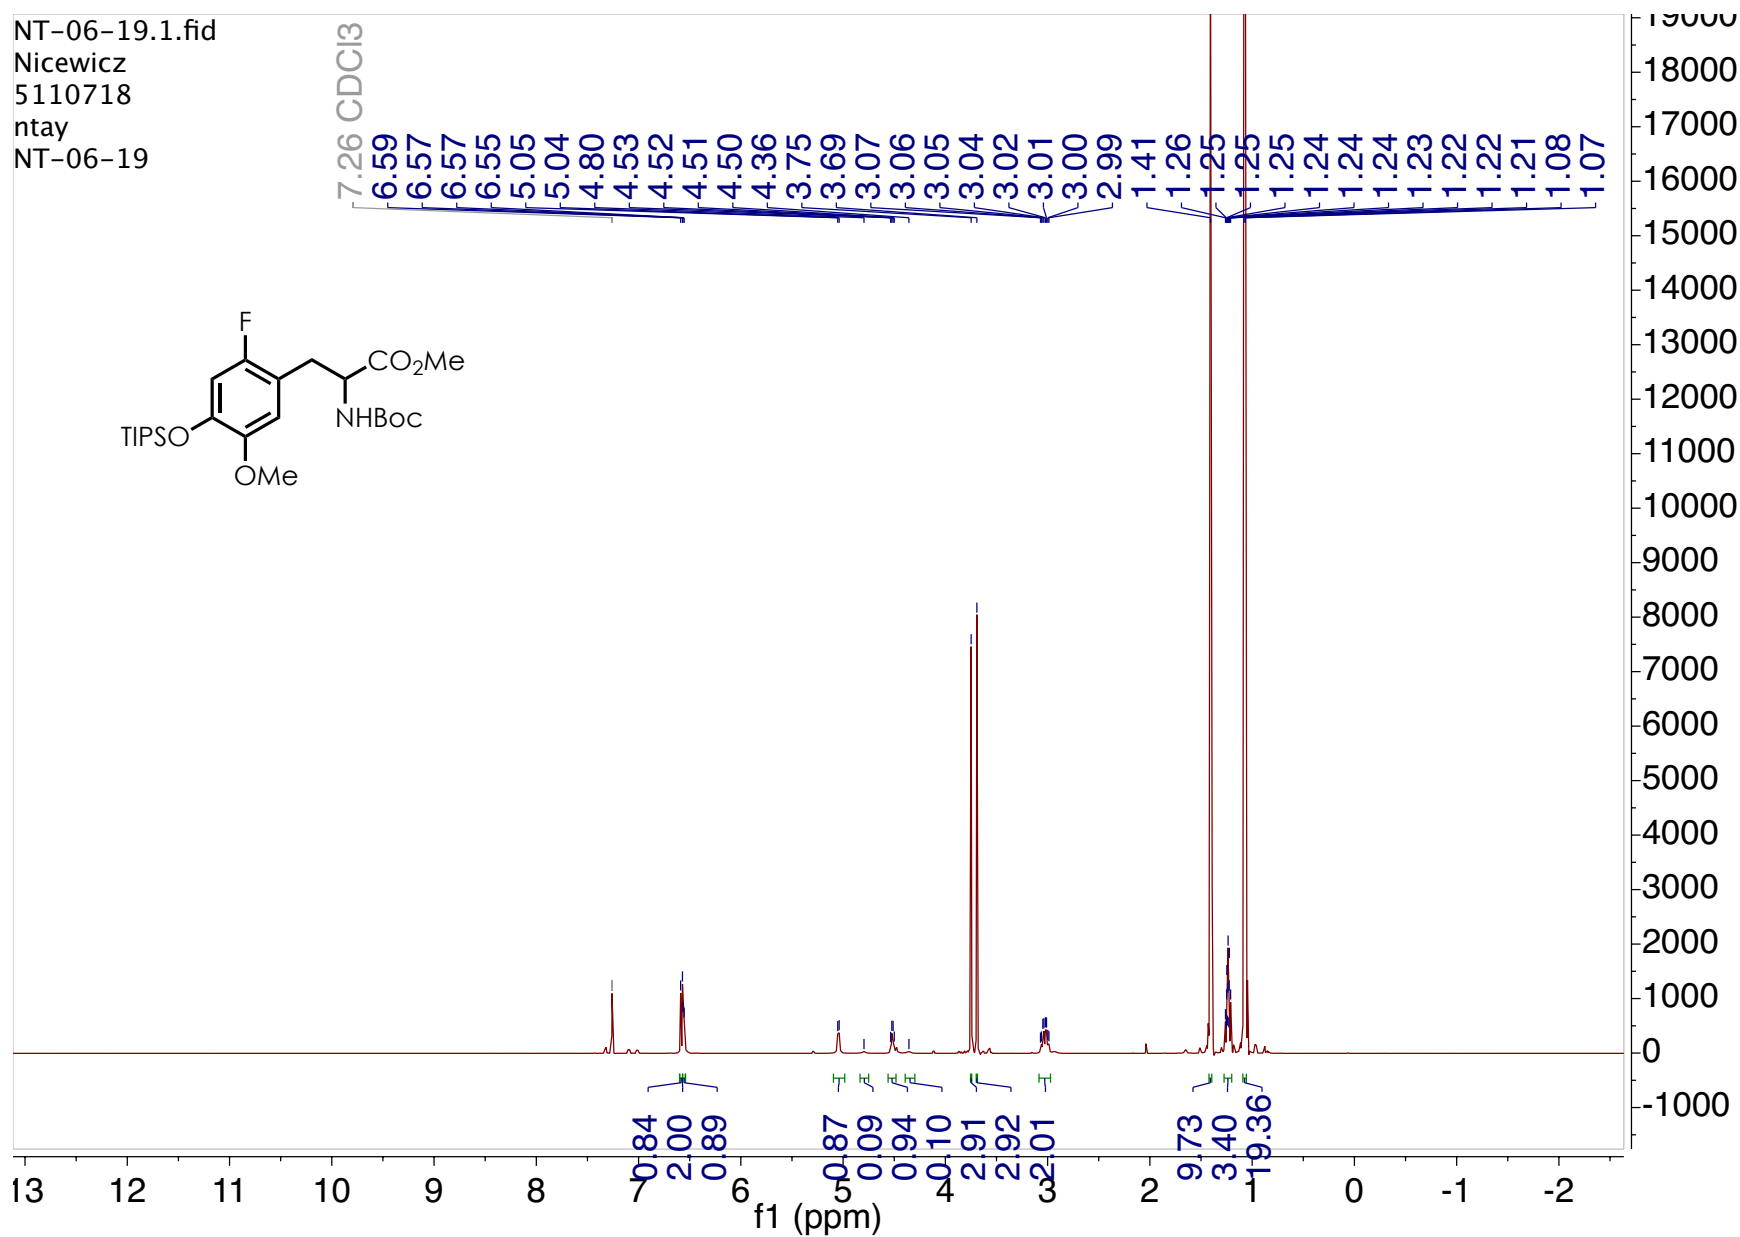

NT-06-19 2.2.fid  
Nicewicz  
5110718  
ntay  
NT-06-19

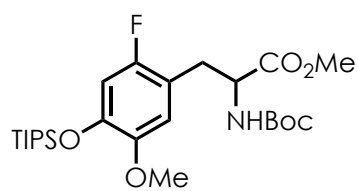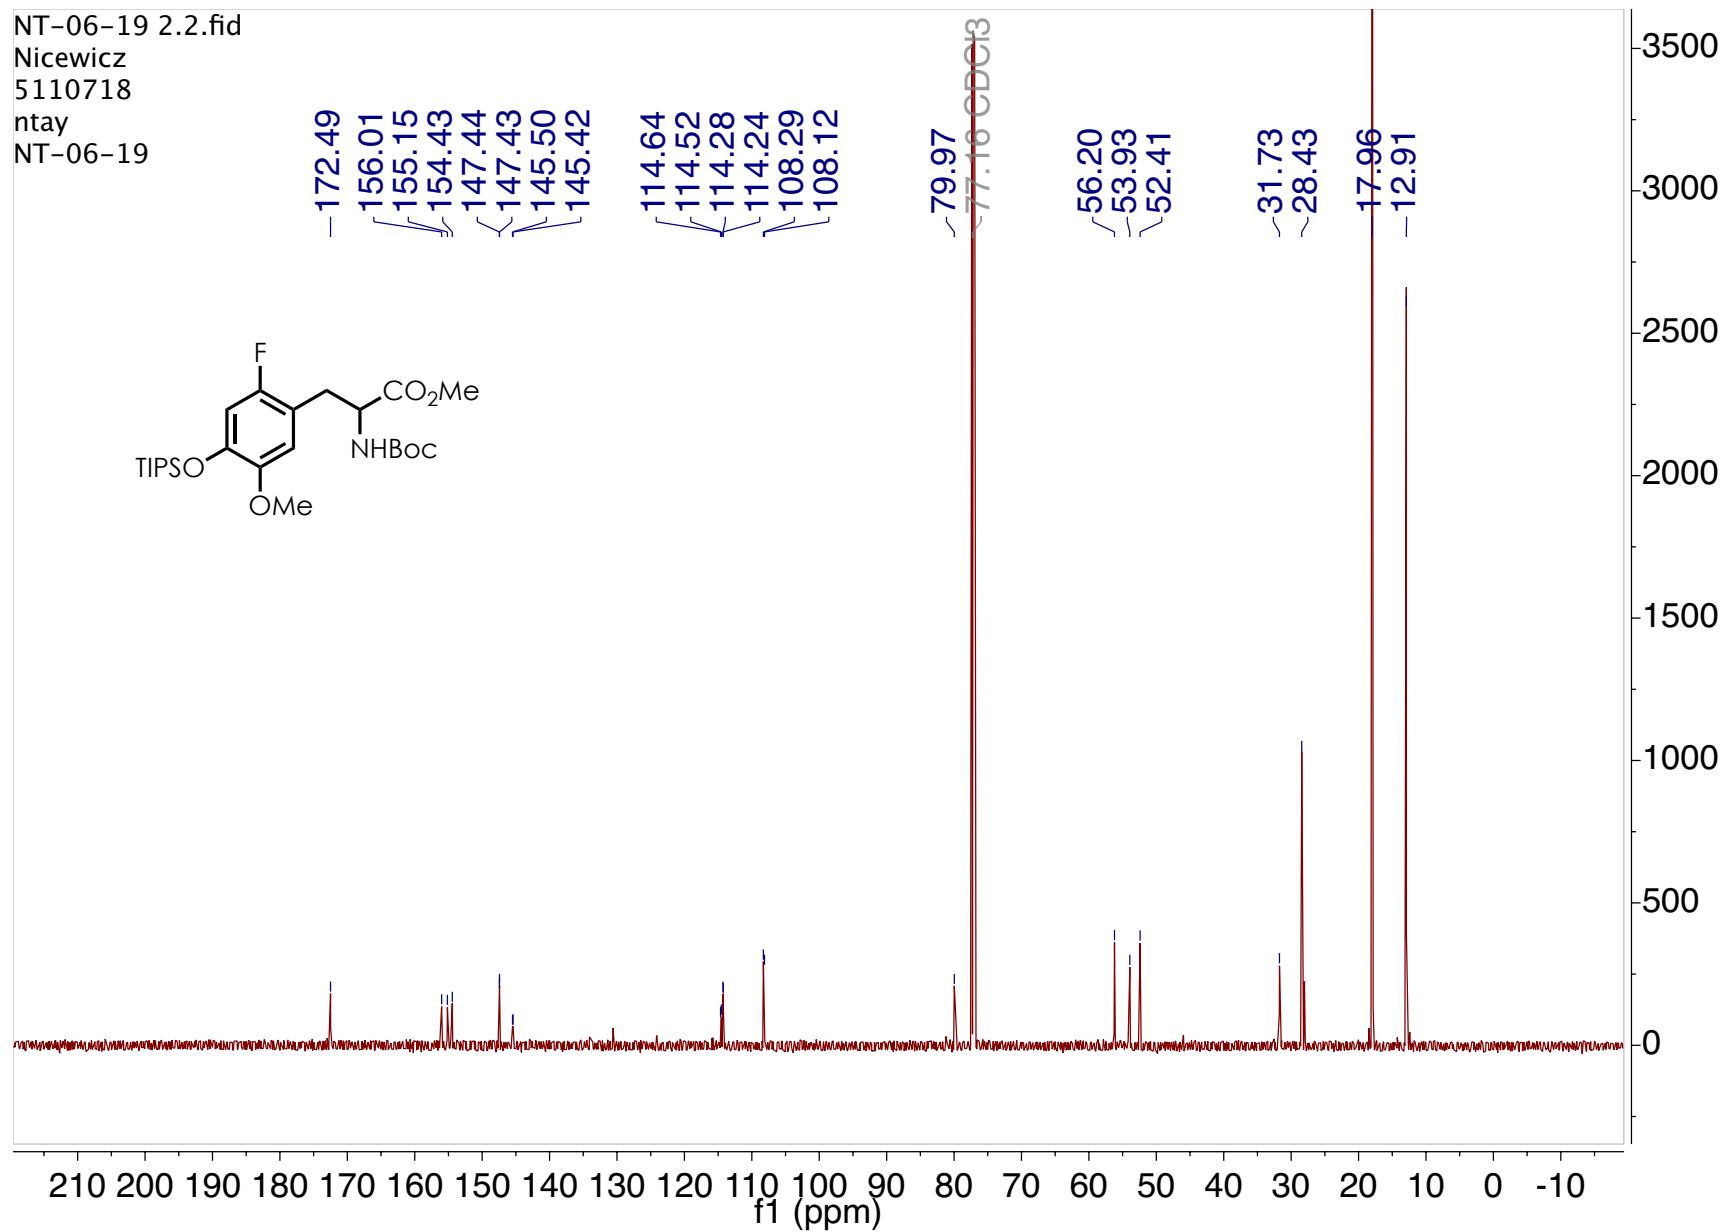

NT-06-19-19F.1.fid

F19 CDCl<sub>3</sub> {C:\data\ntay} nmrsu 55

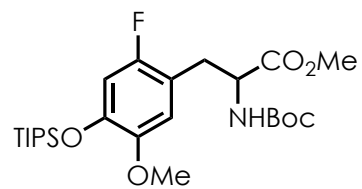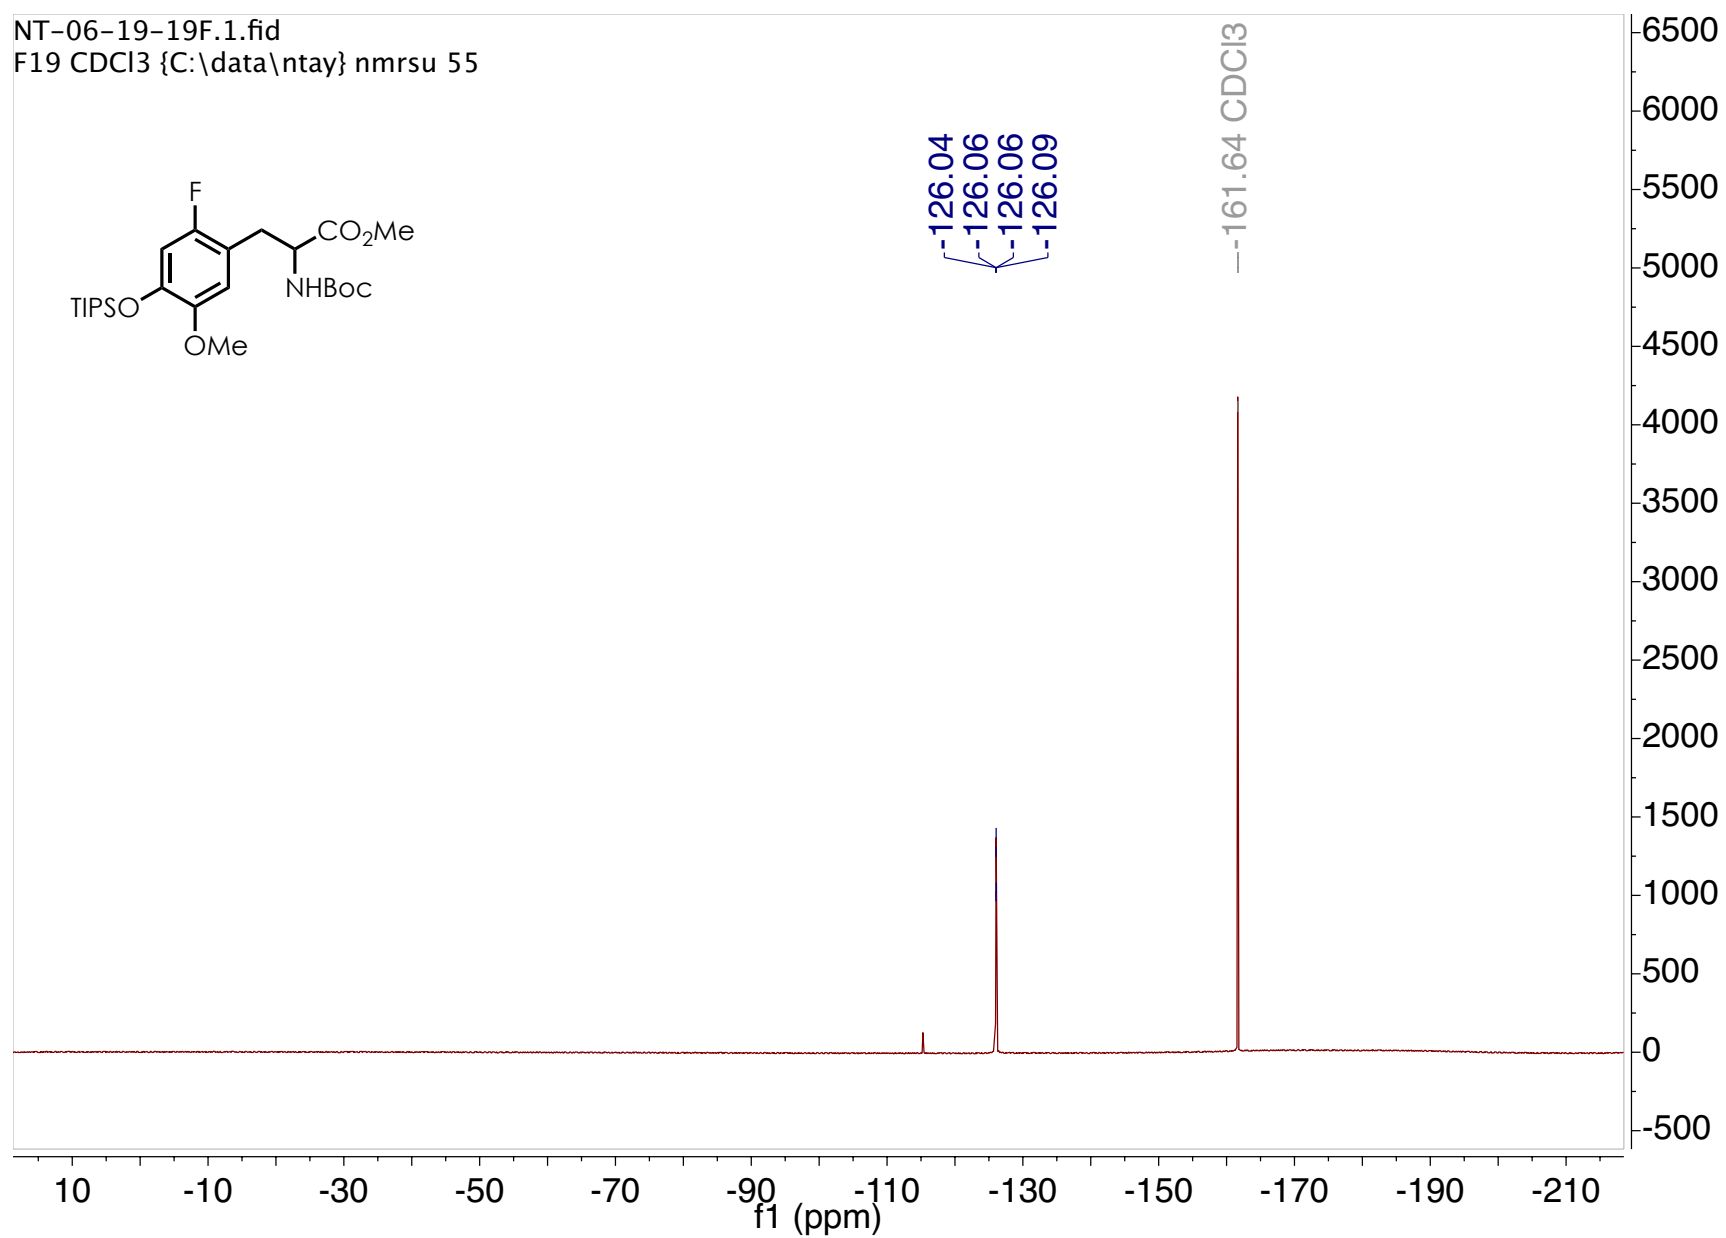

NT-06-21.1.fid  
 Nicewicz  
 5110718  
 ntay  
 NT-06-21

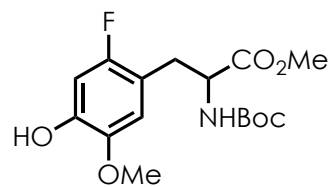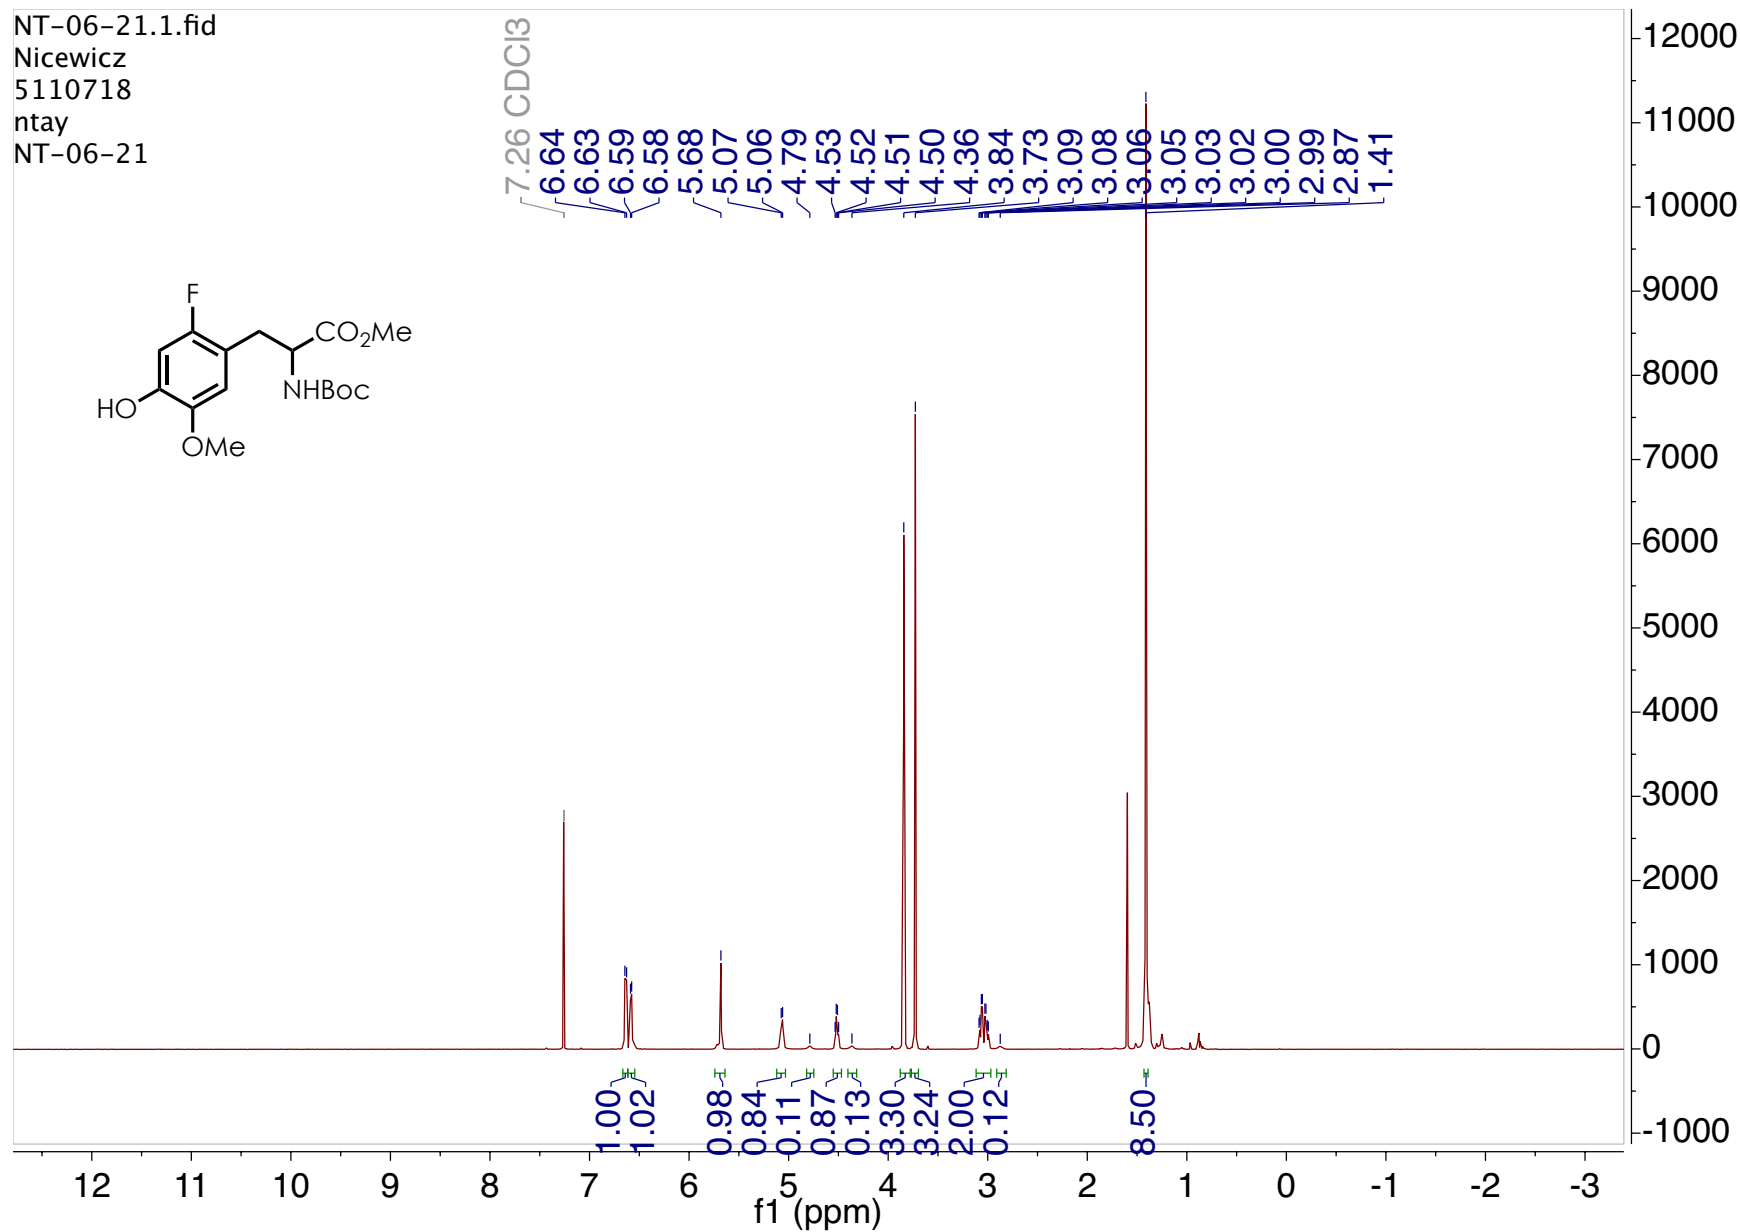

NT-06-21-13C.2.fid

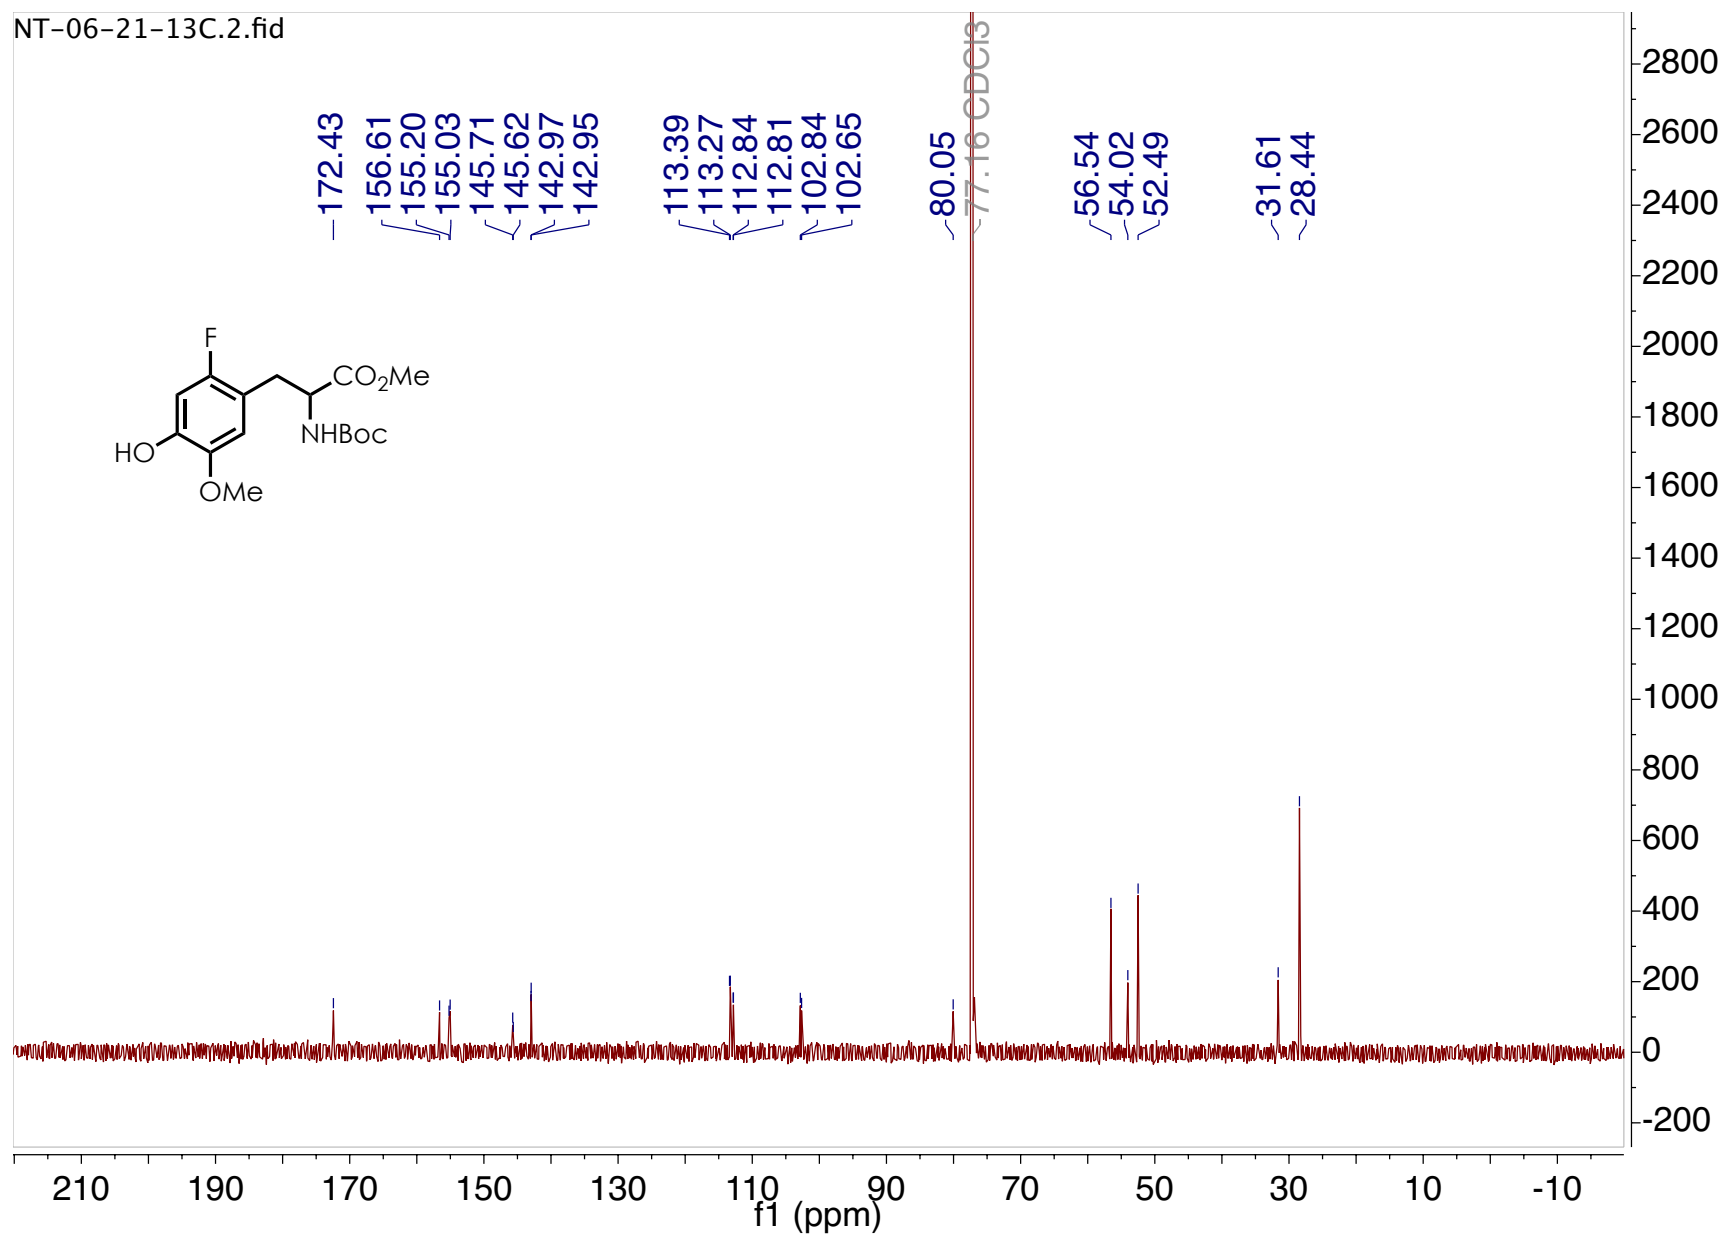

NT-06-21-19F.1.fid

F19 CDCl<sub>3</sub> {C:\data\ntay} nmrsu 47

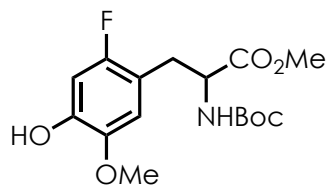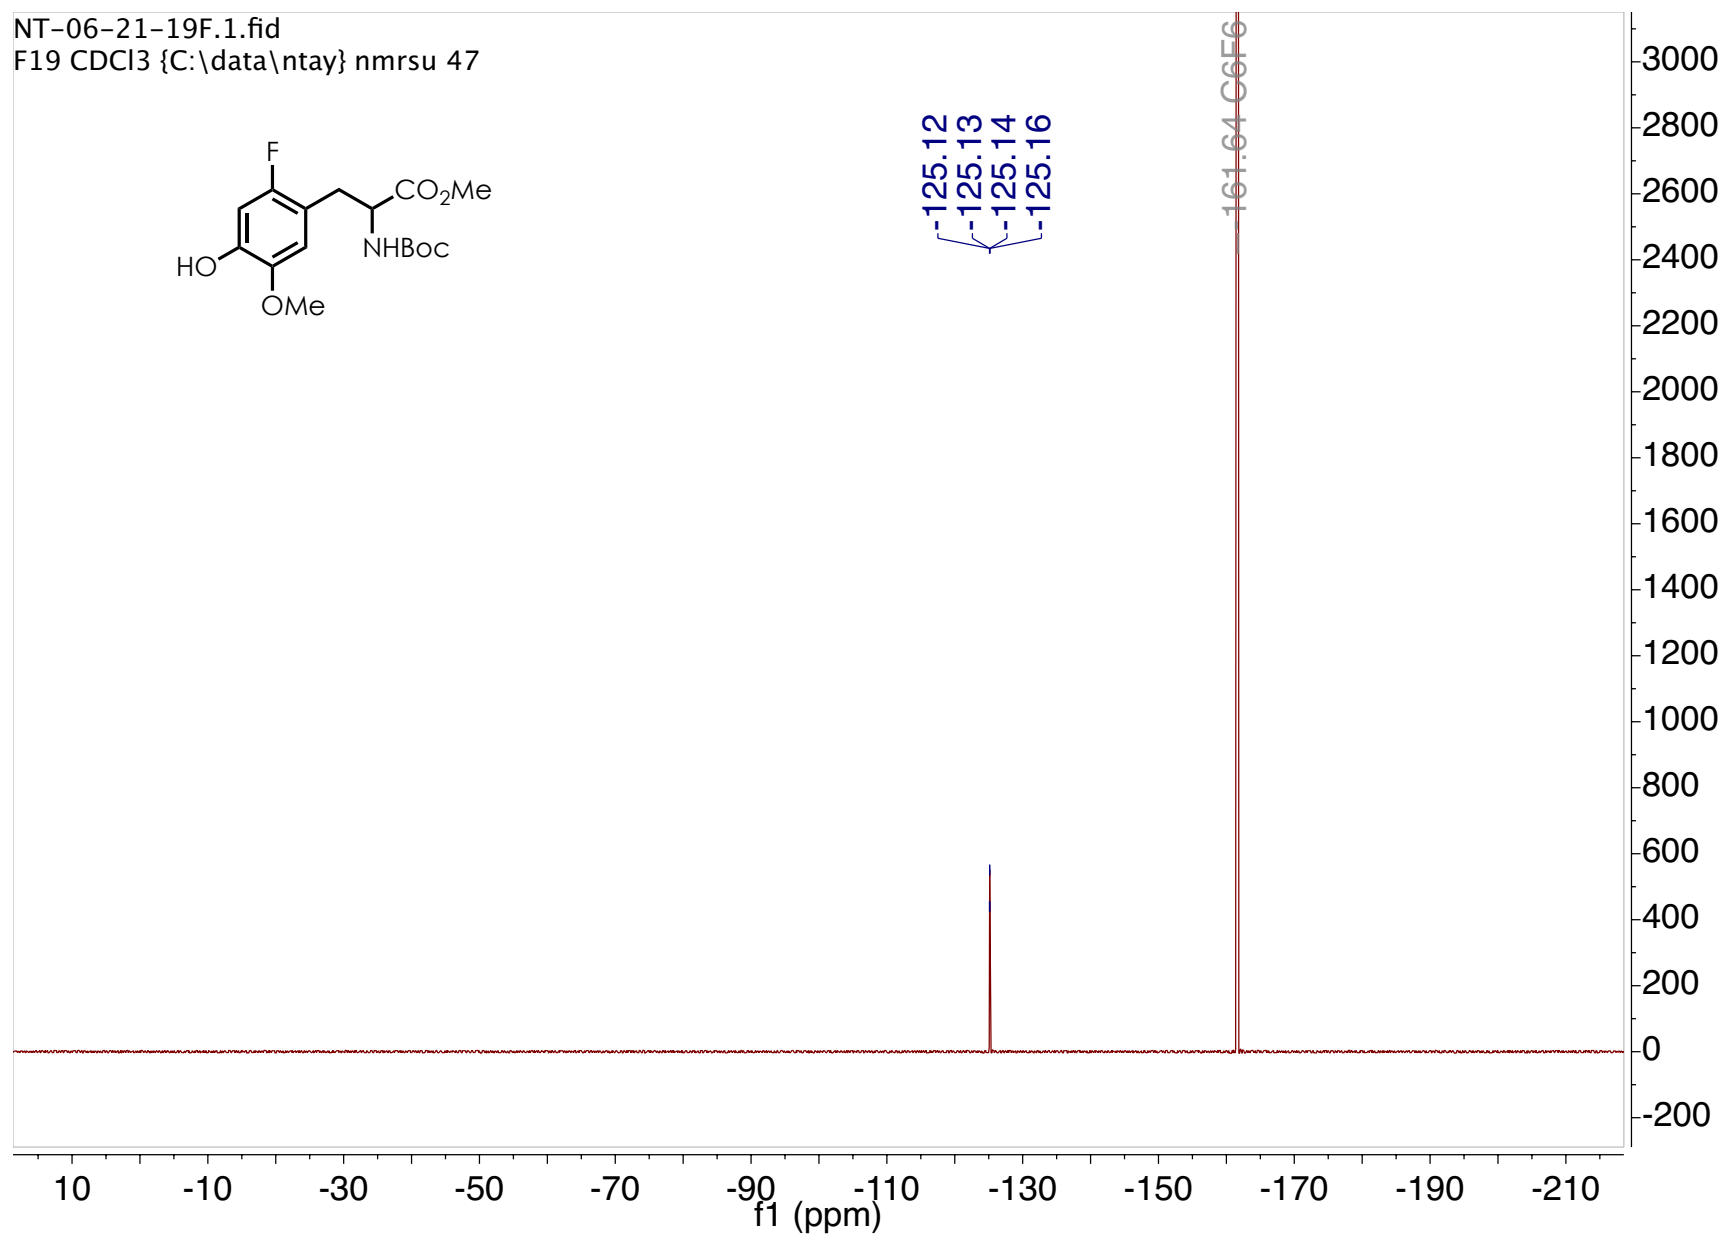

NT-06-25.1.fid  
 Nicewicz  
 5110718  
 ntay  
 NT-06-25

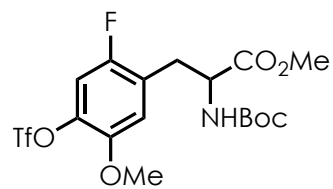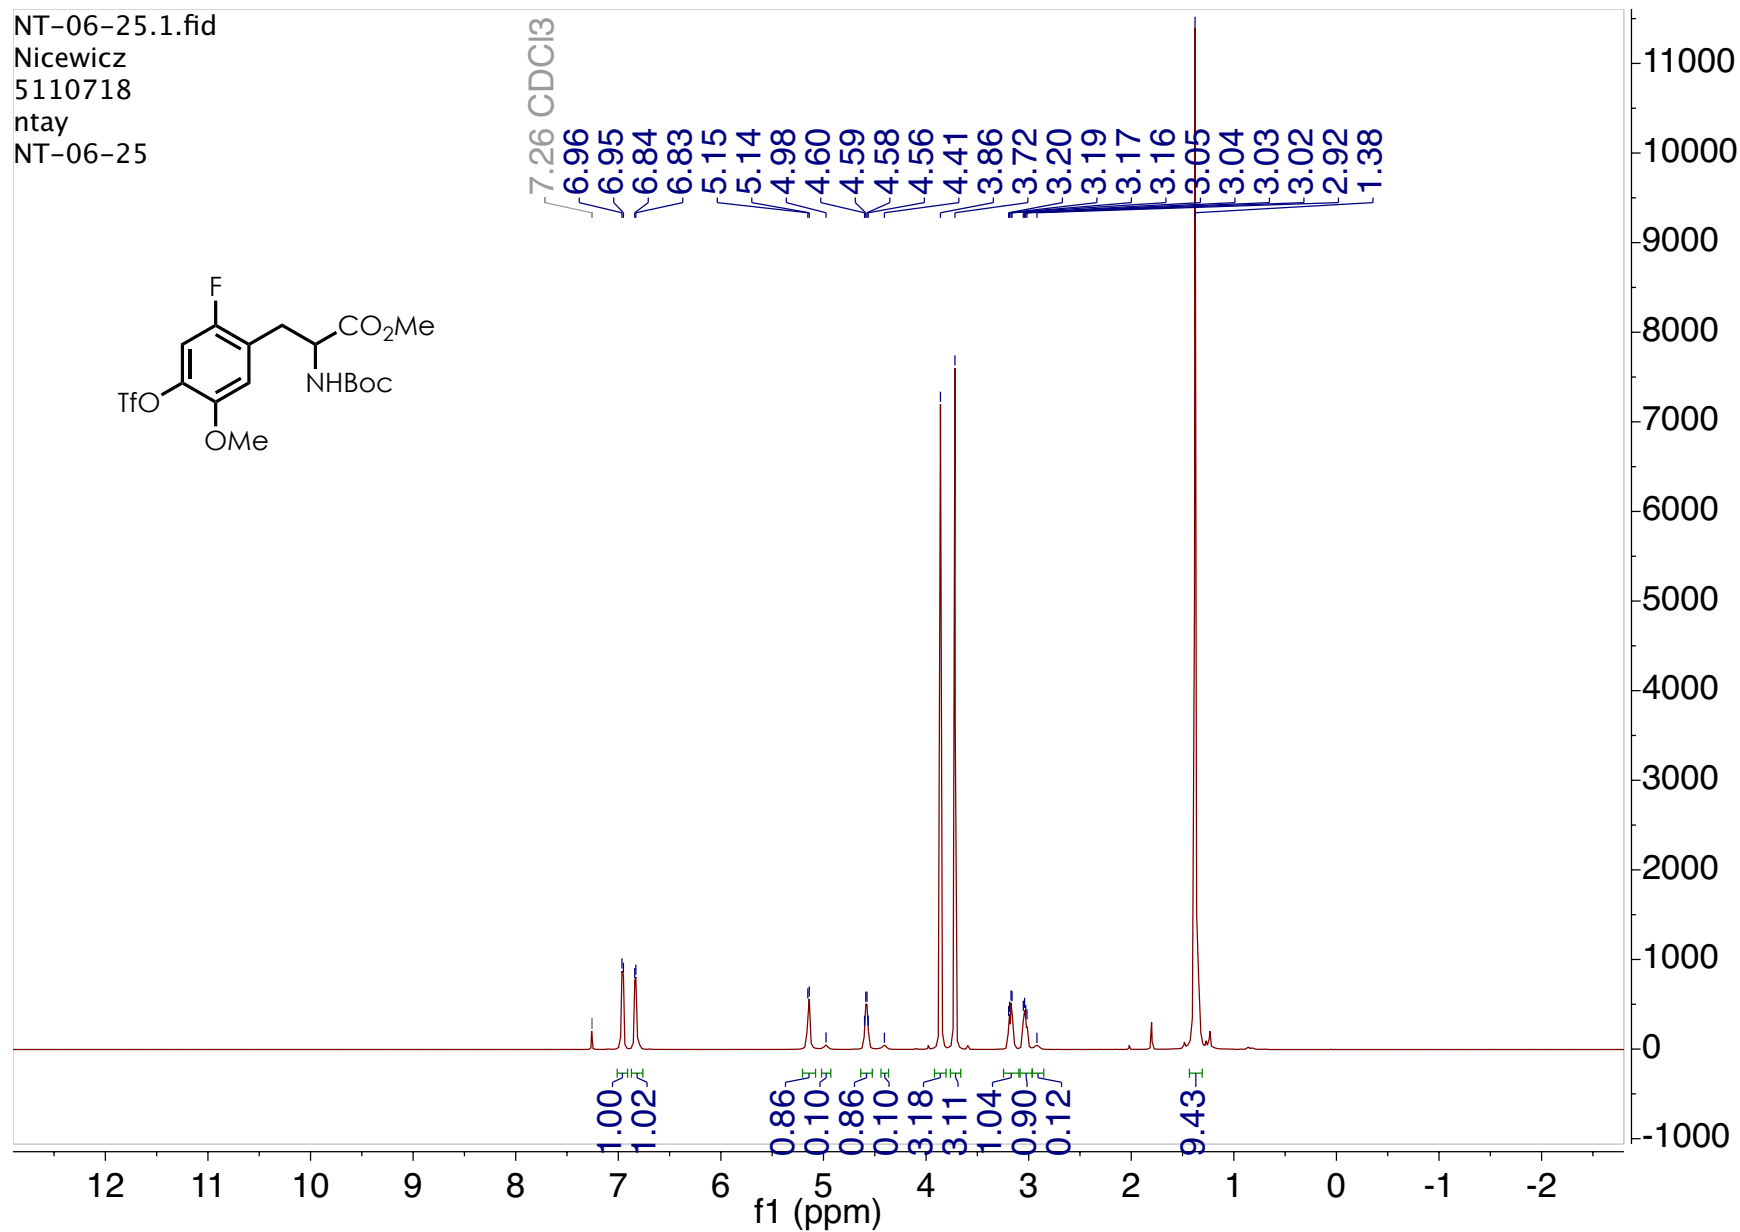

NT-06-25 2.2.fid

Nicewicz

5110718

ntay

NT-06-25

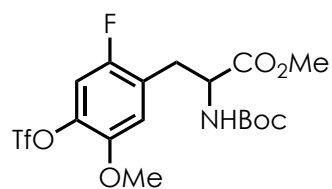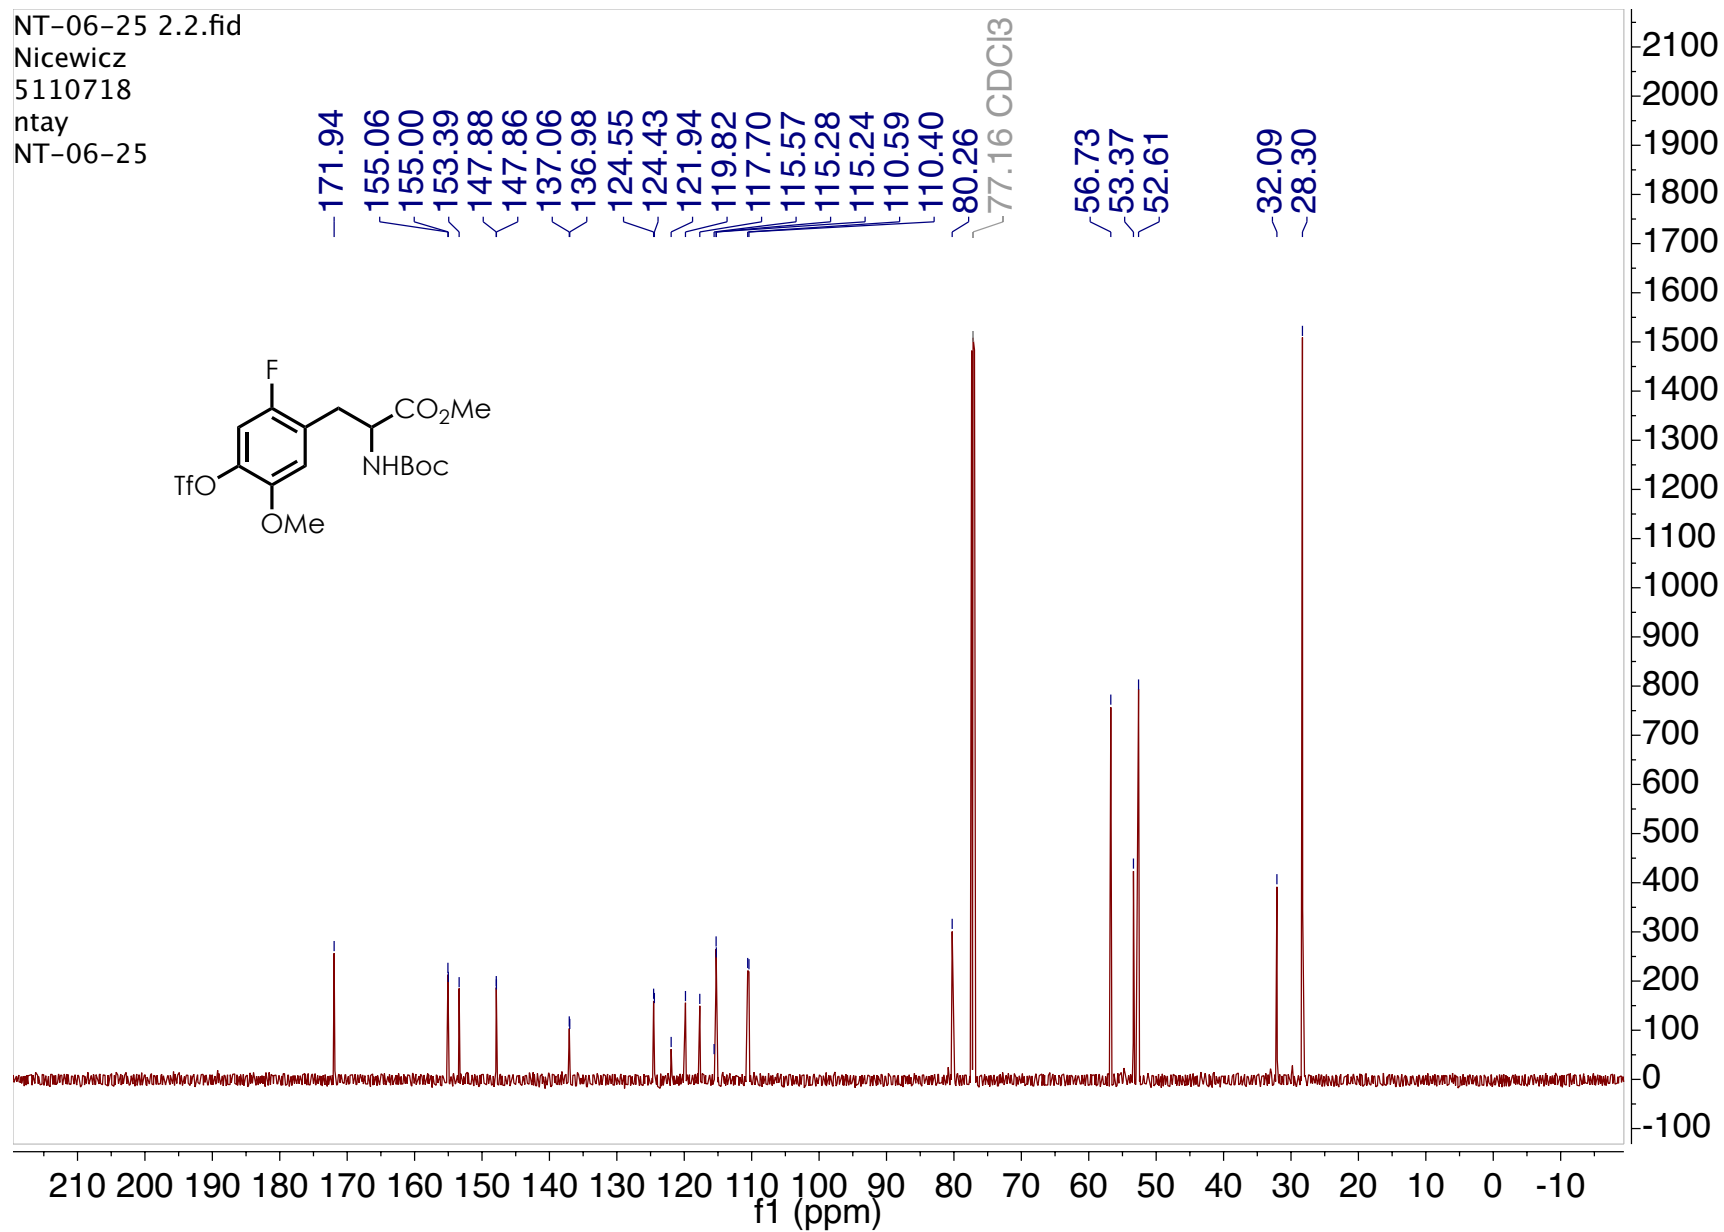

NT-06-25-19F.1.fid

F19 CDCl3 {C:\data\ntay} nmrsu 43

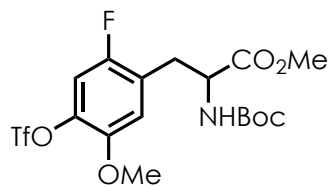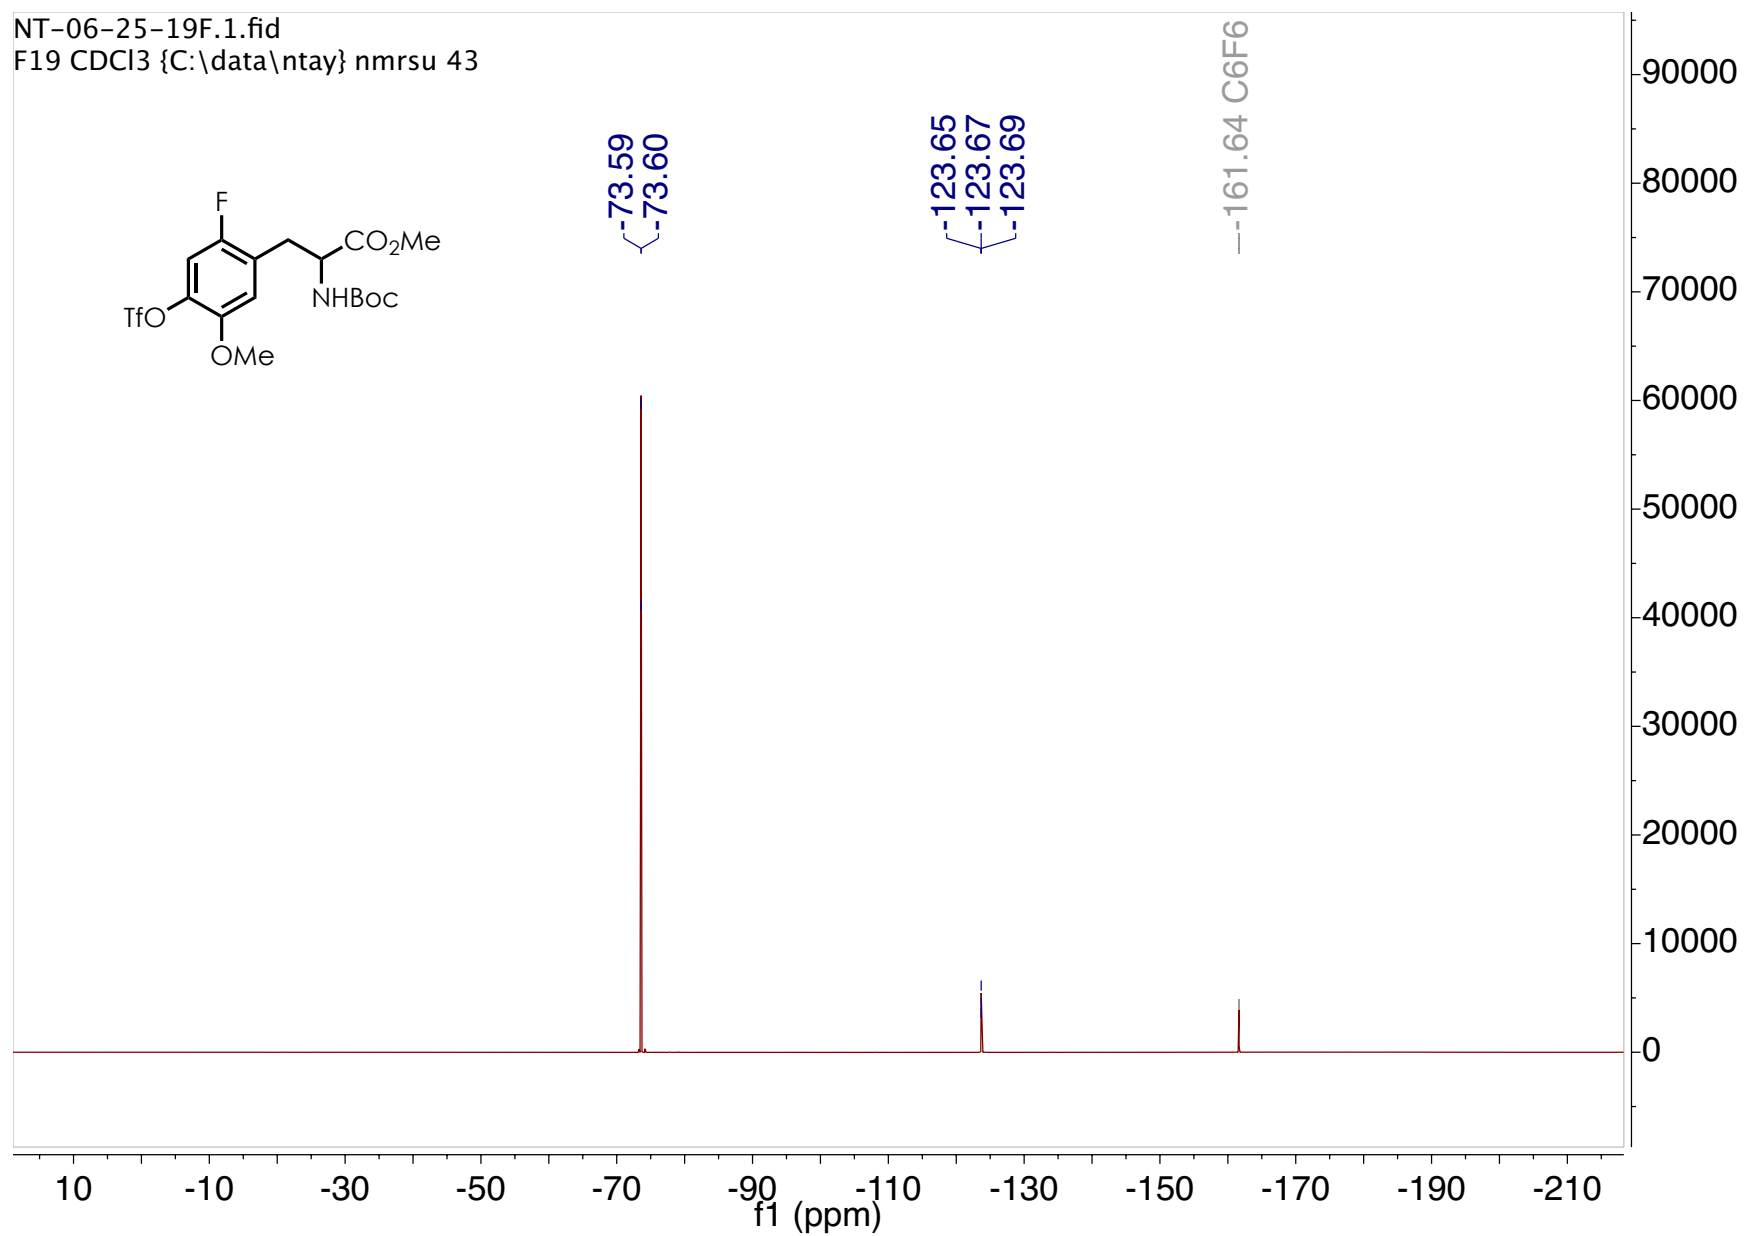

NT-06-171-1H.1.fid  
NT-06-171-1H

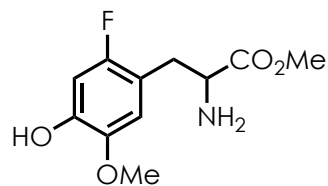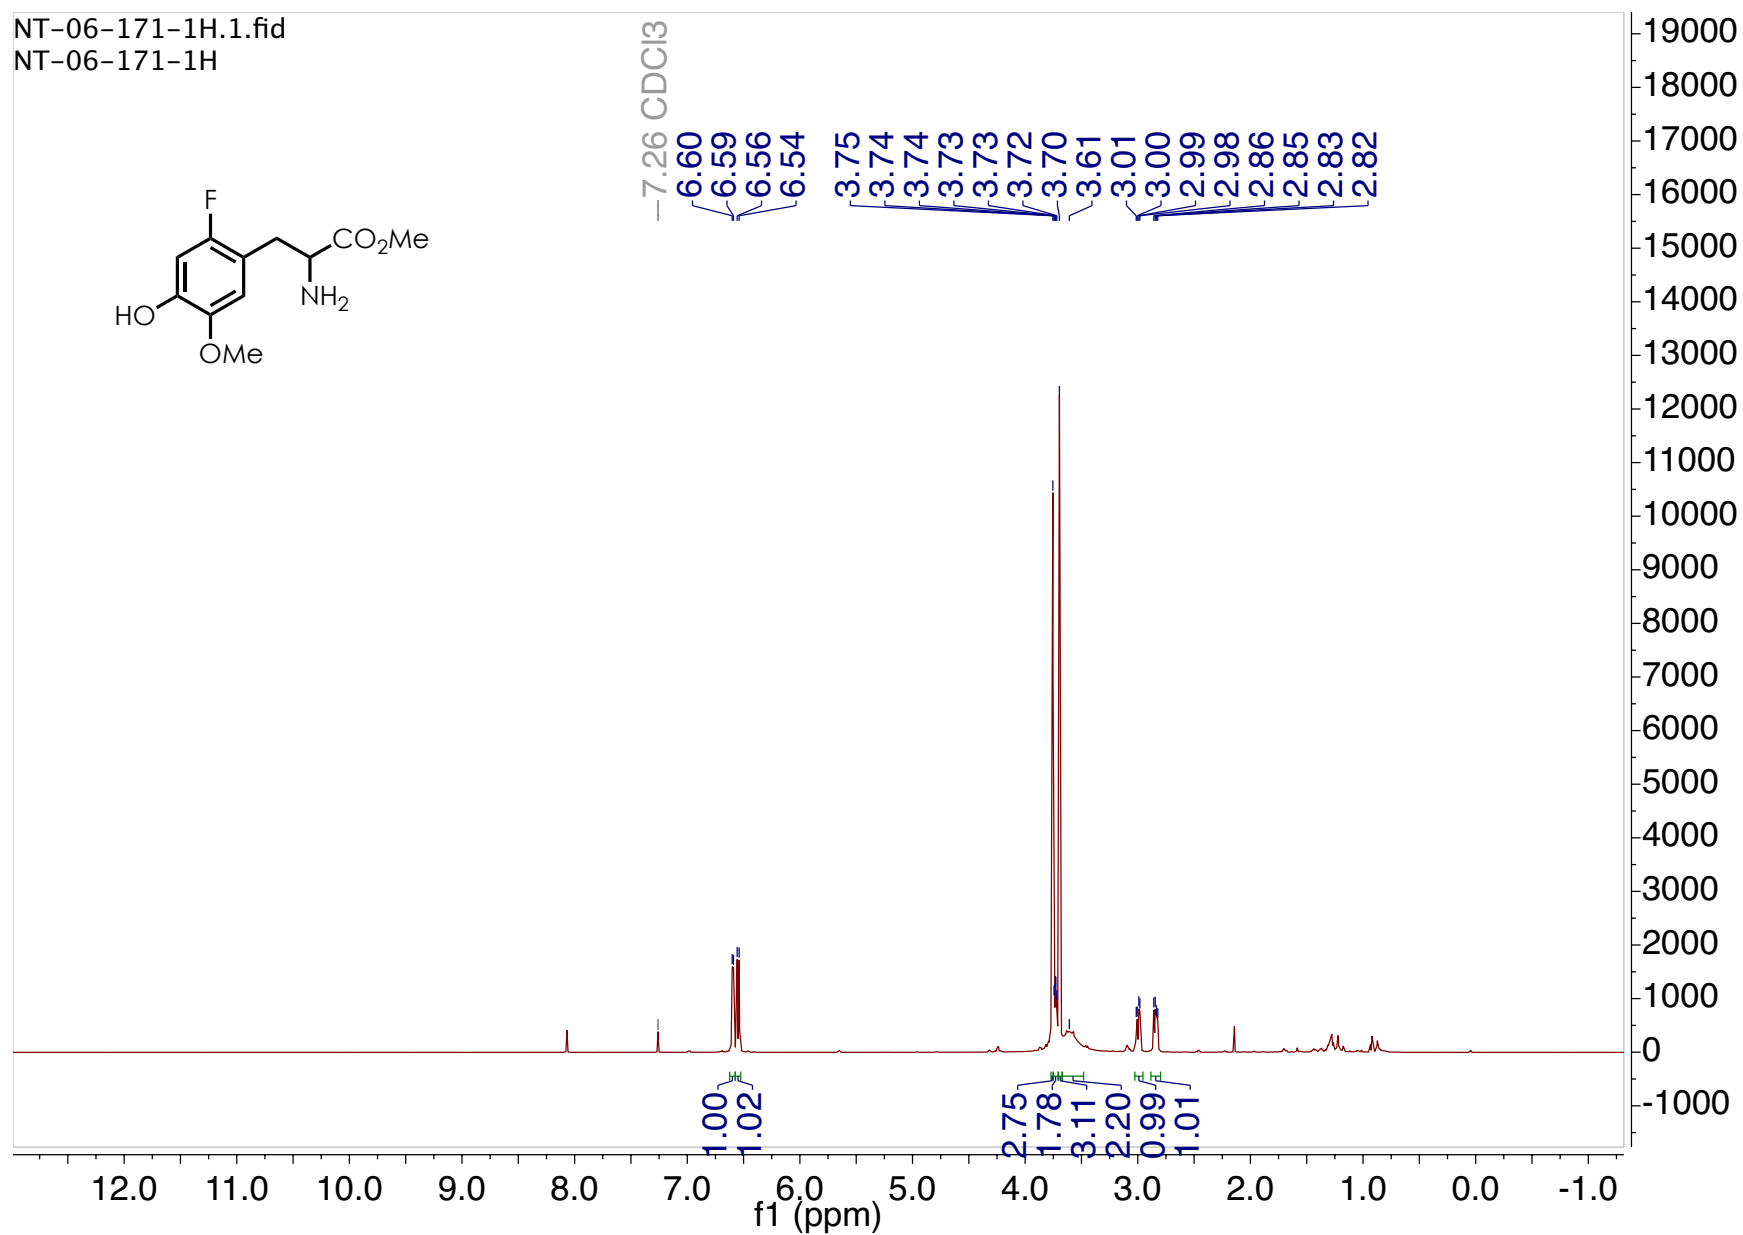

NT-06-171-13C.1.fid  
NT-06-171-13C

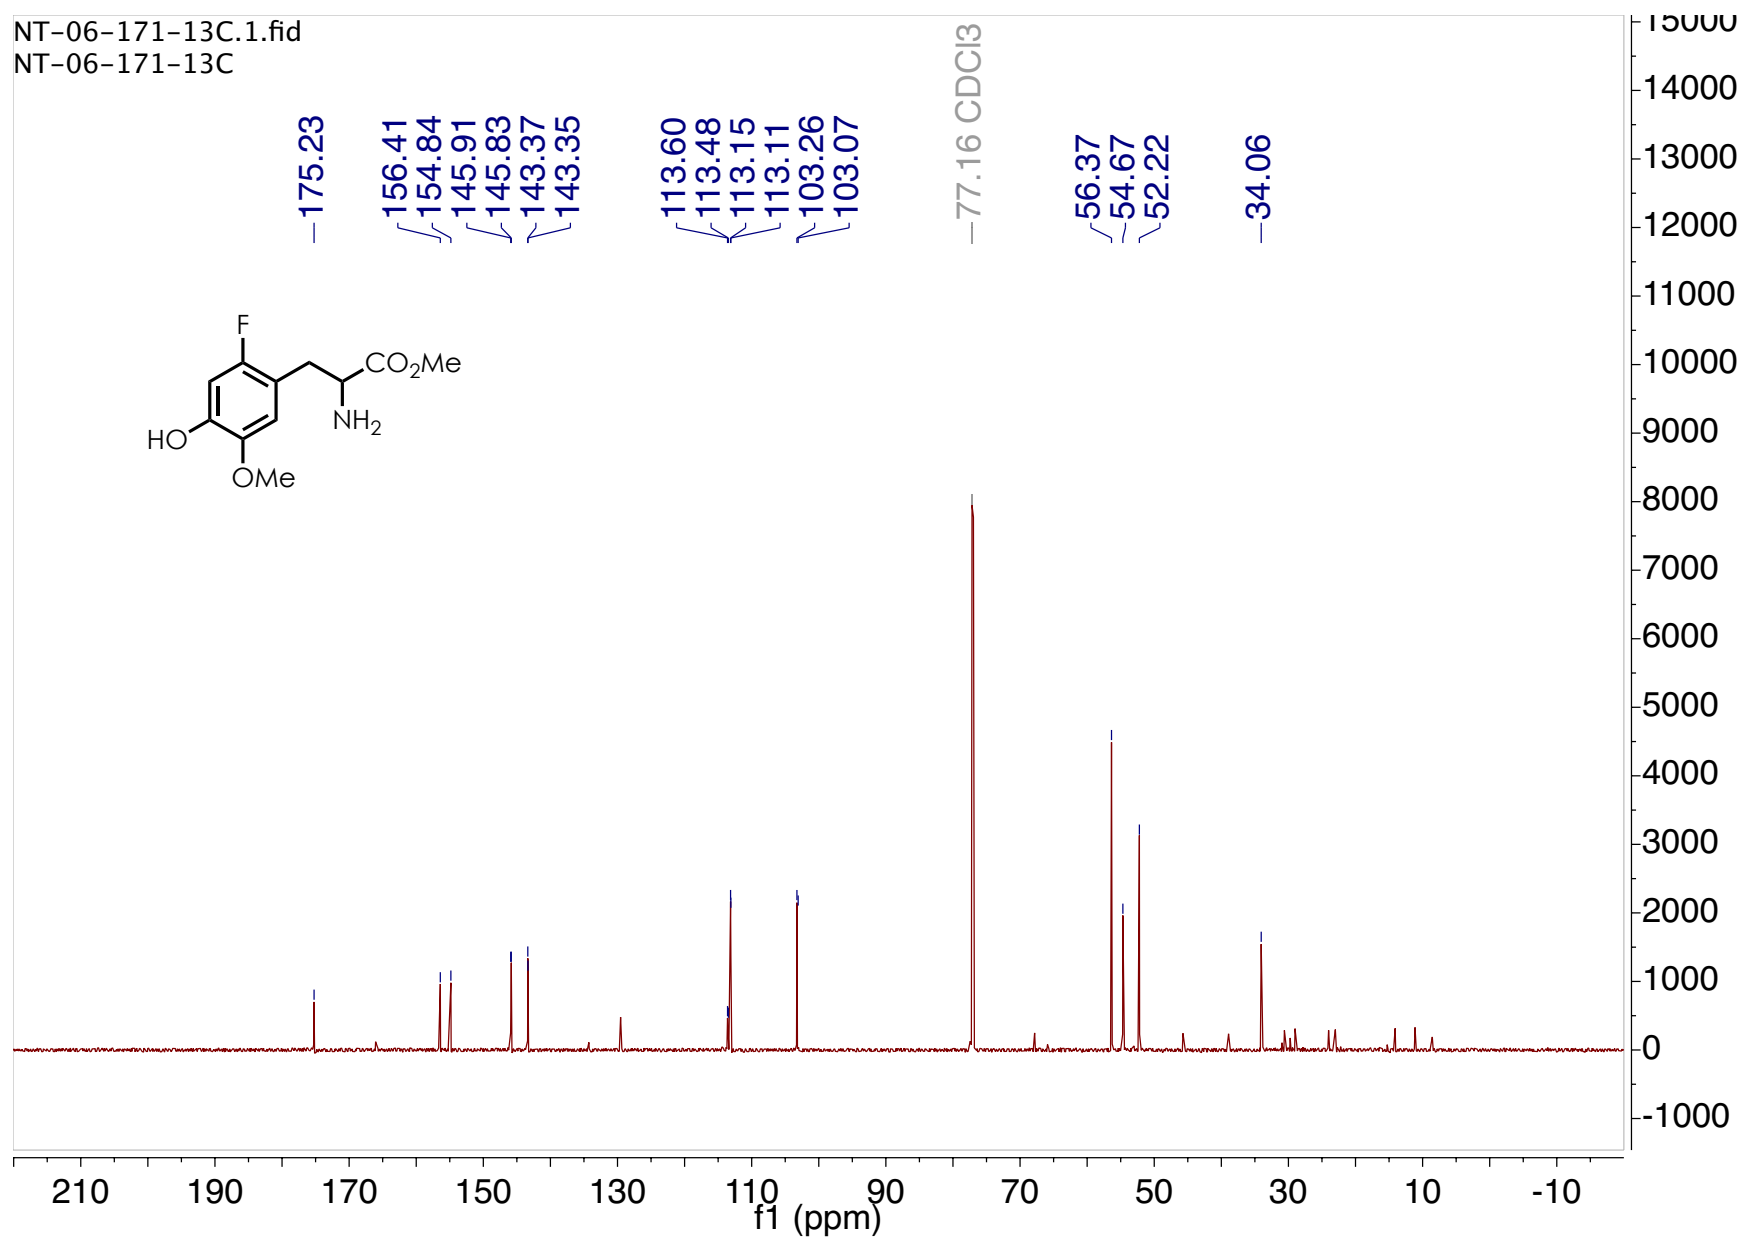

NT-06-171-19F 2.1.fid  
F19 CDCl3 {C:\data\ntay} nmrsu 28

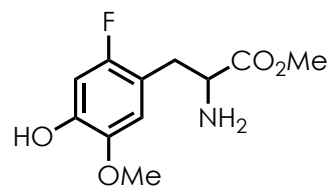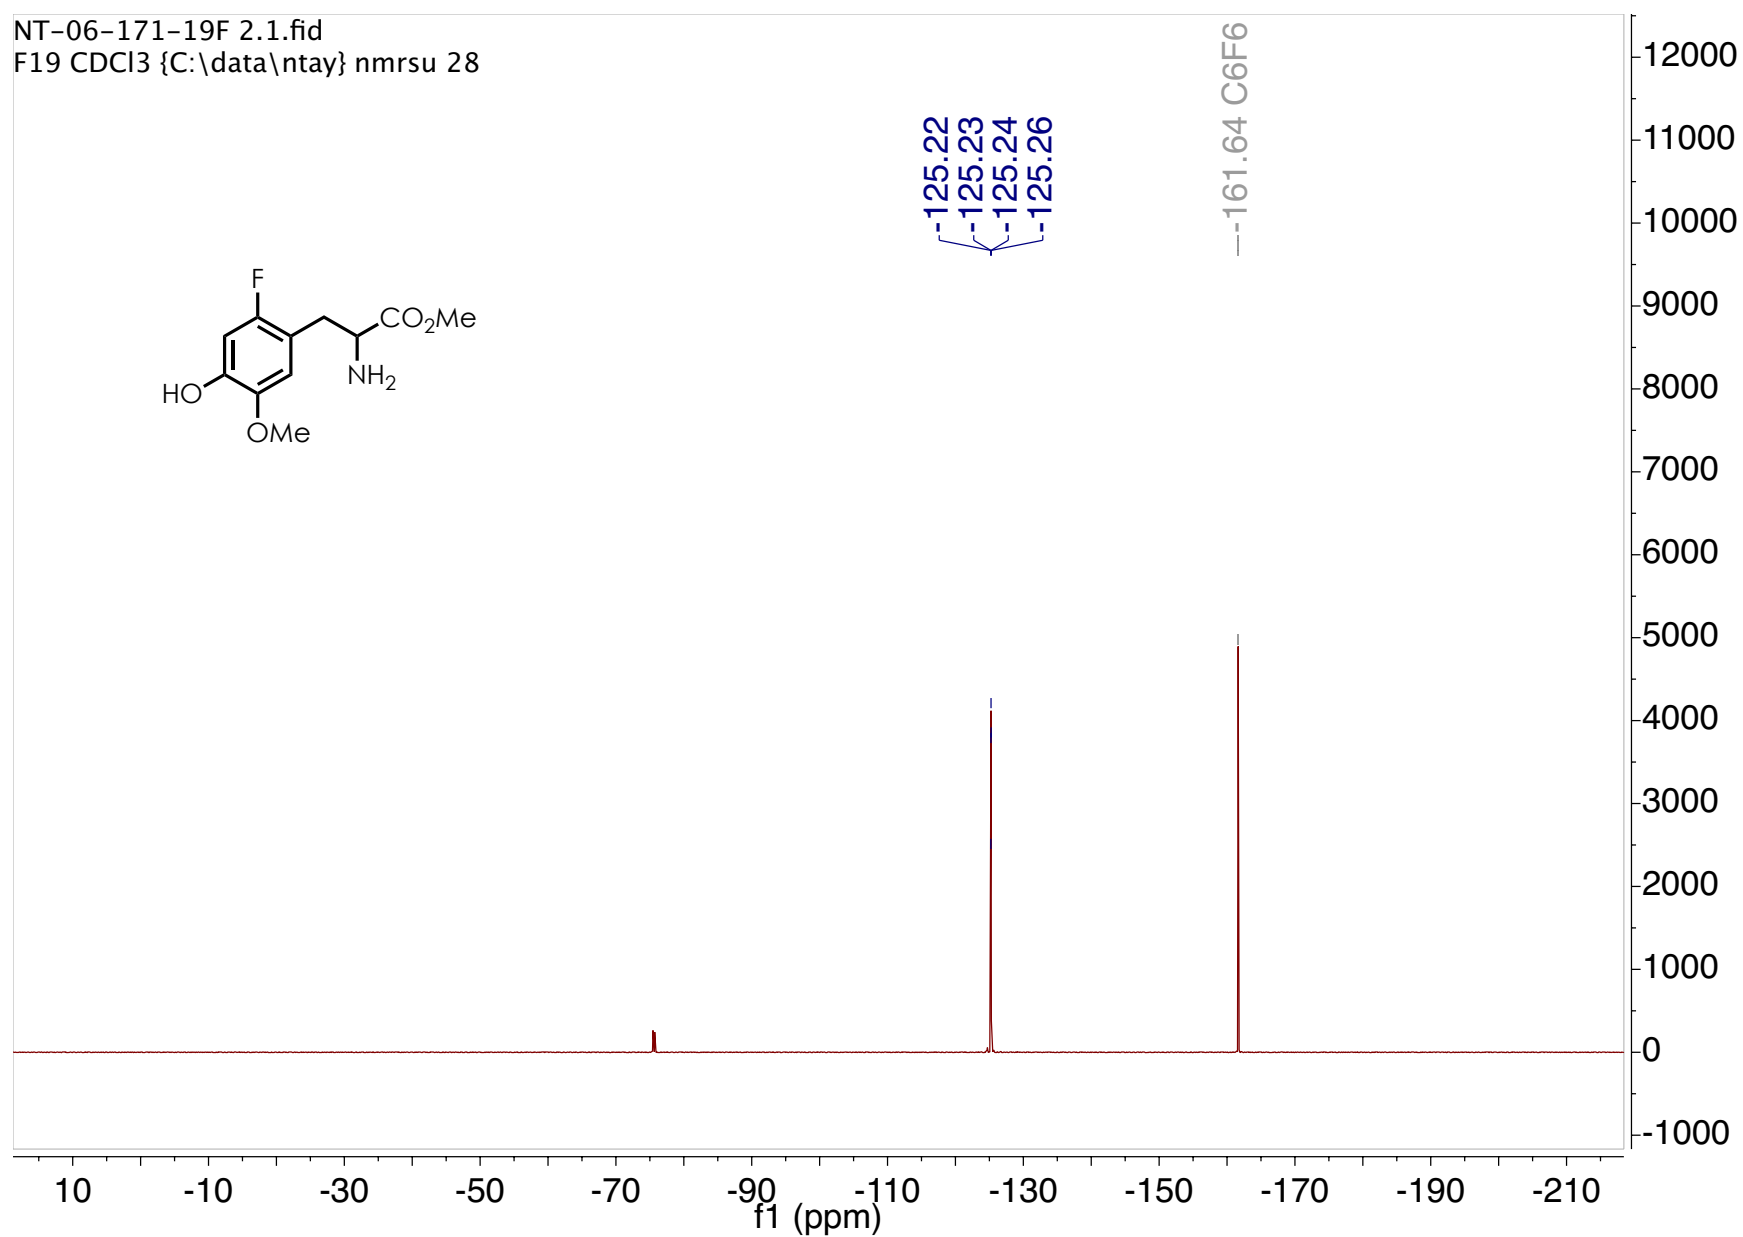

NT-07-30 3.1.fid  
Nicewicz  
5106082  
ntay  
NT-07-30

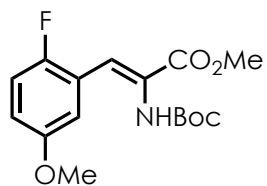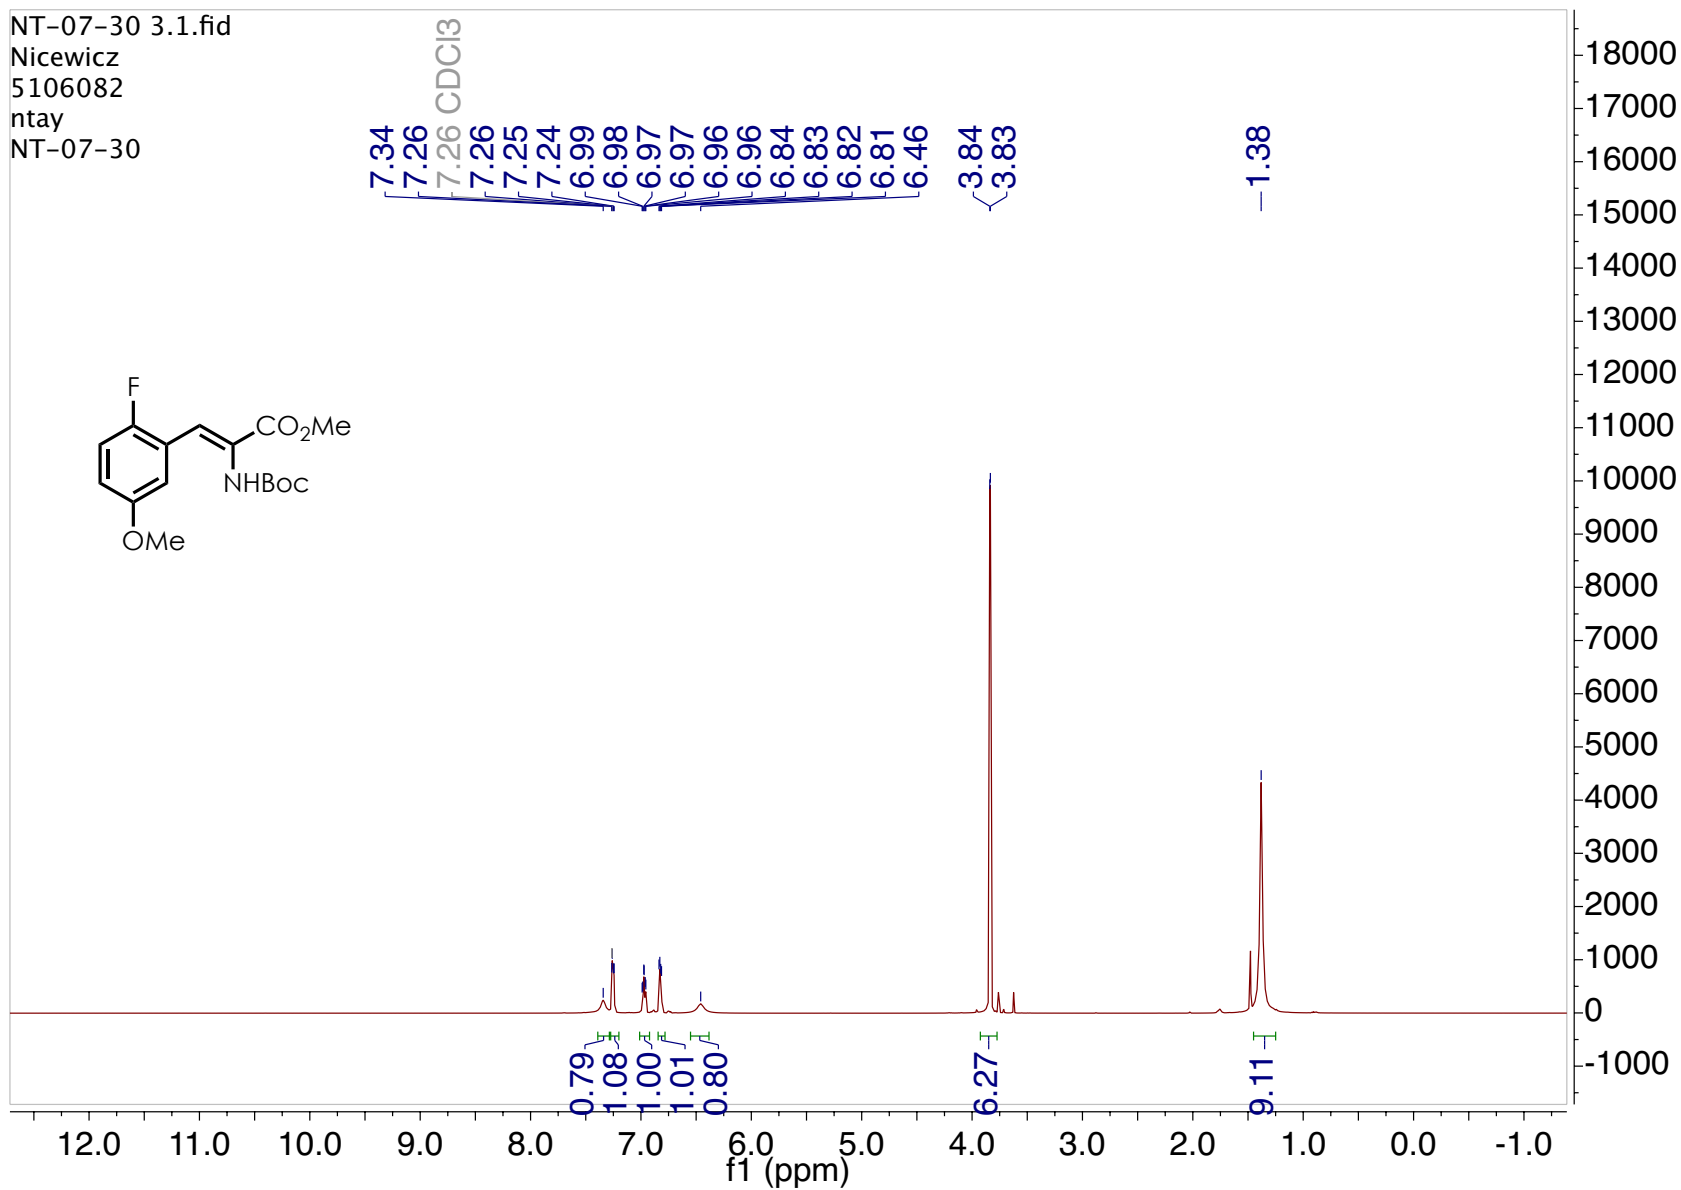

NT-07-30 4.2.fid  
Nicewicz  
5106082  
ntay  
NT-07-30

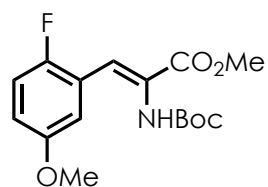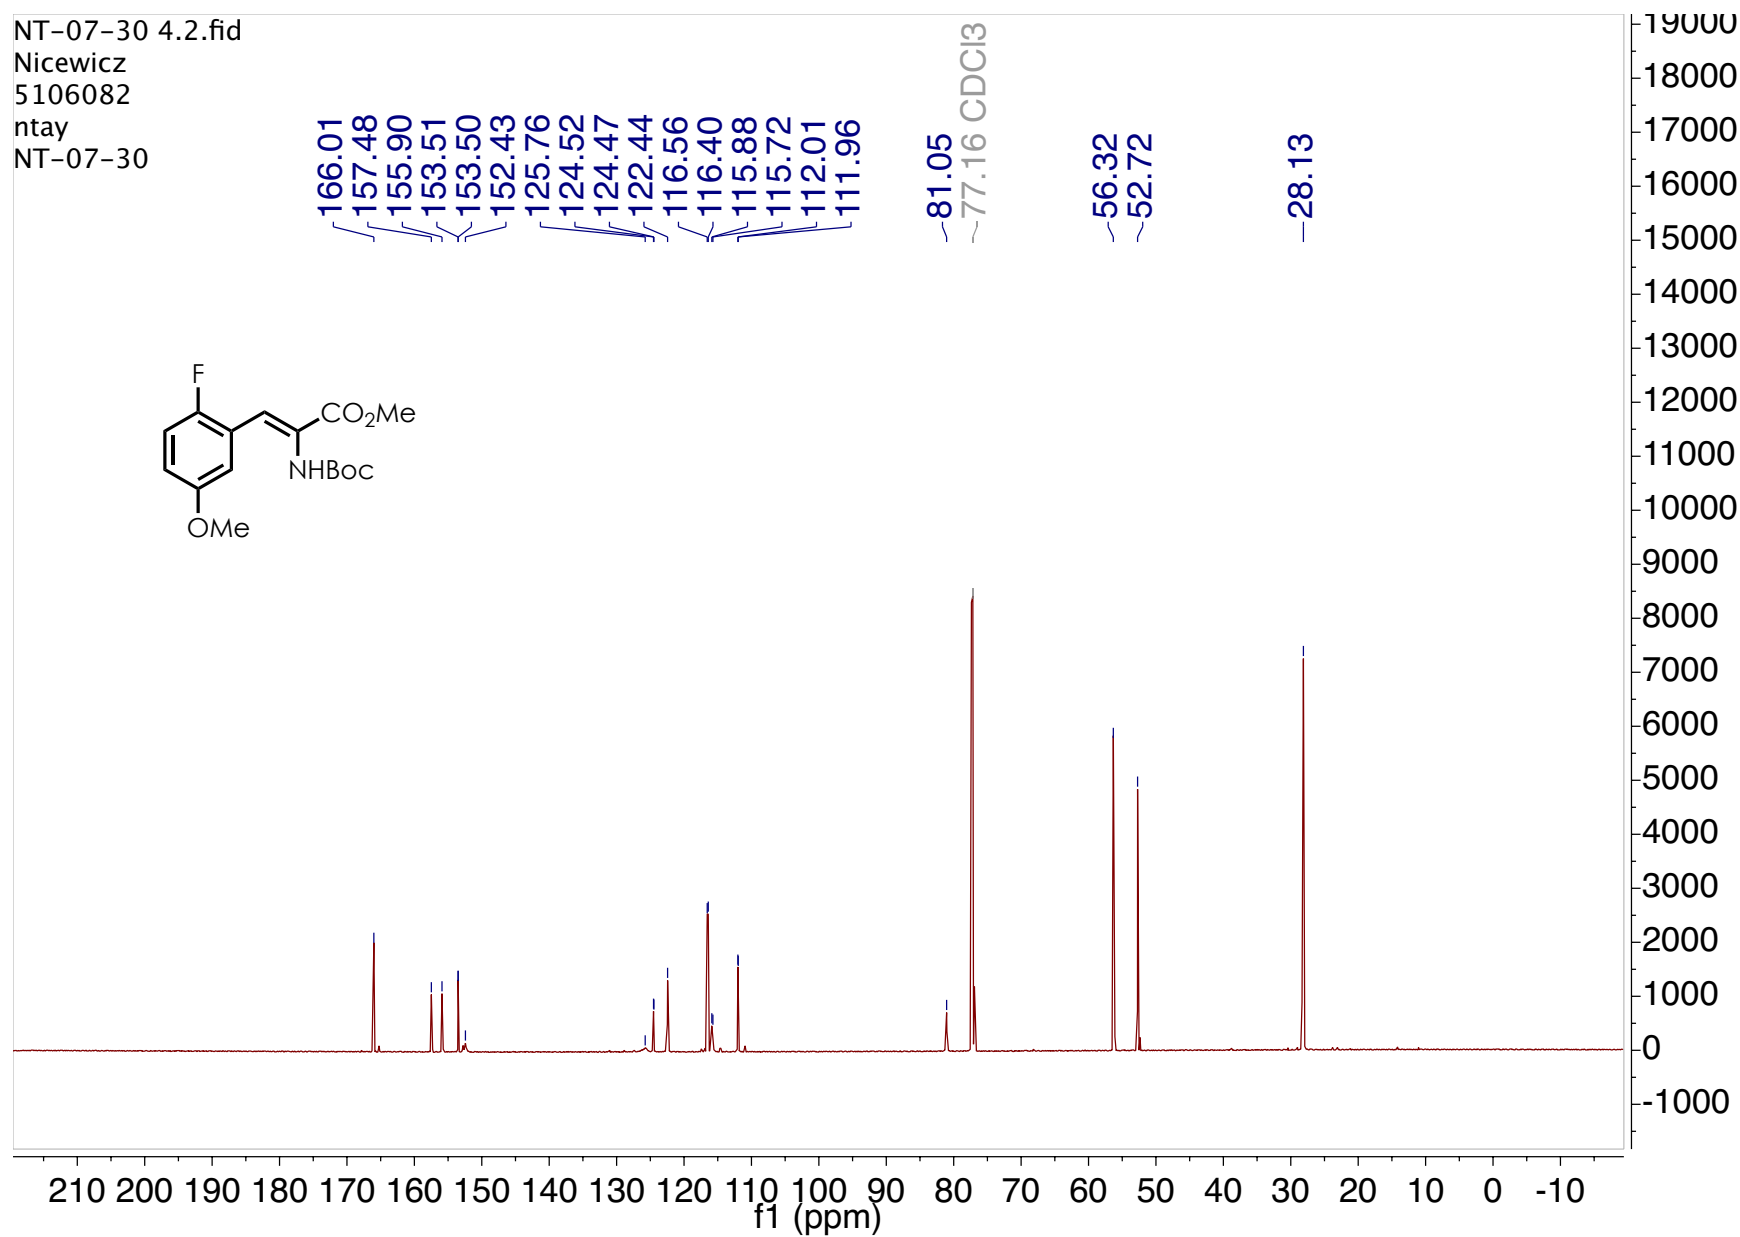

NT-07-30 1.1.fid  
F19 CDCl3 {C:\data\ntay} nmrsu 49

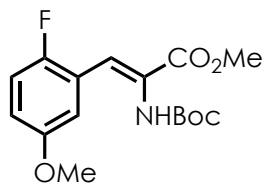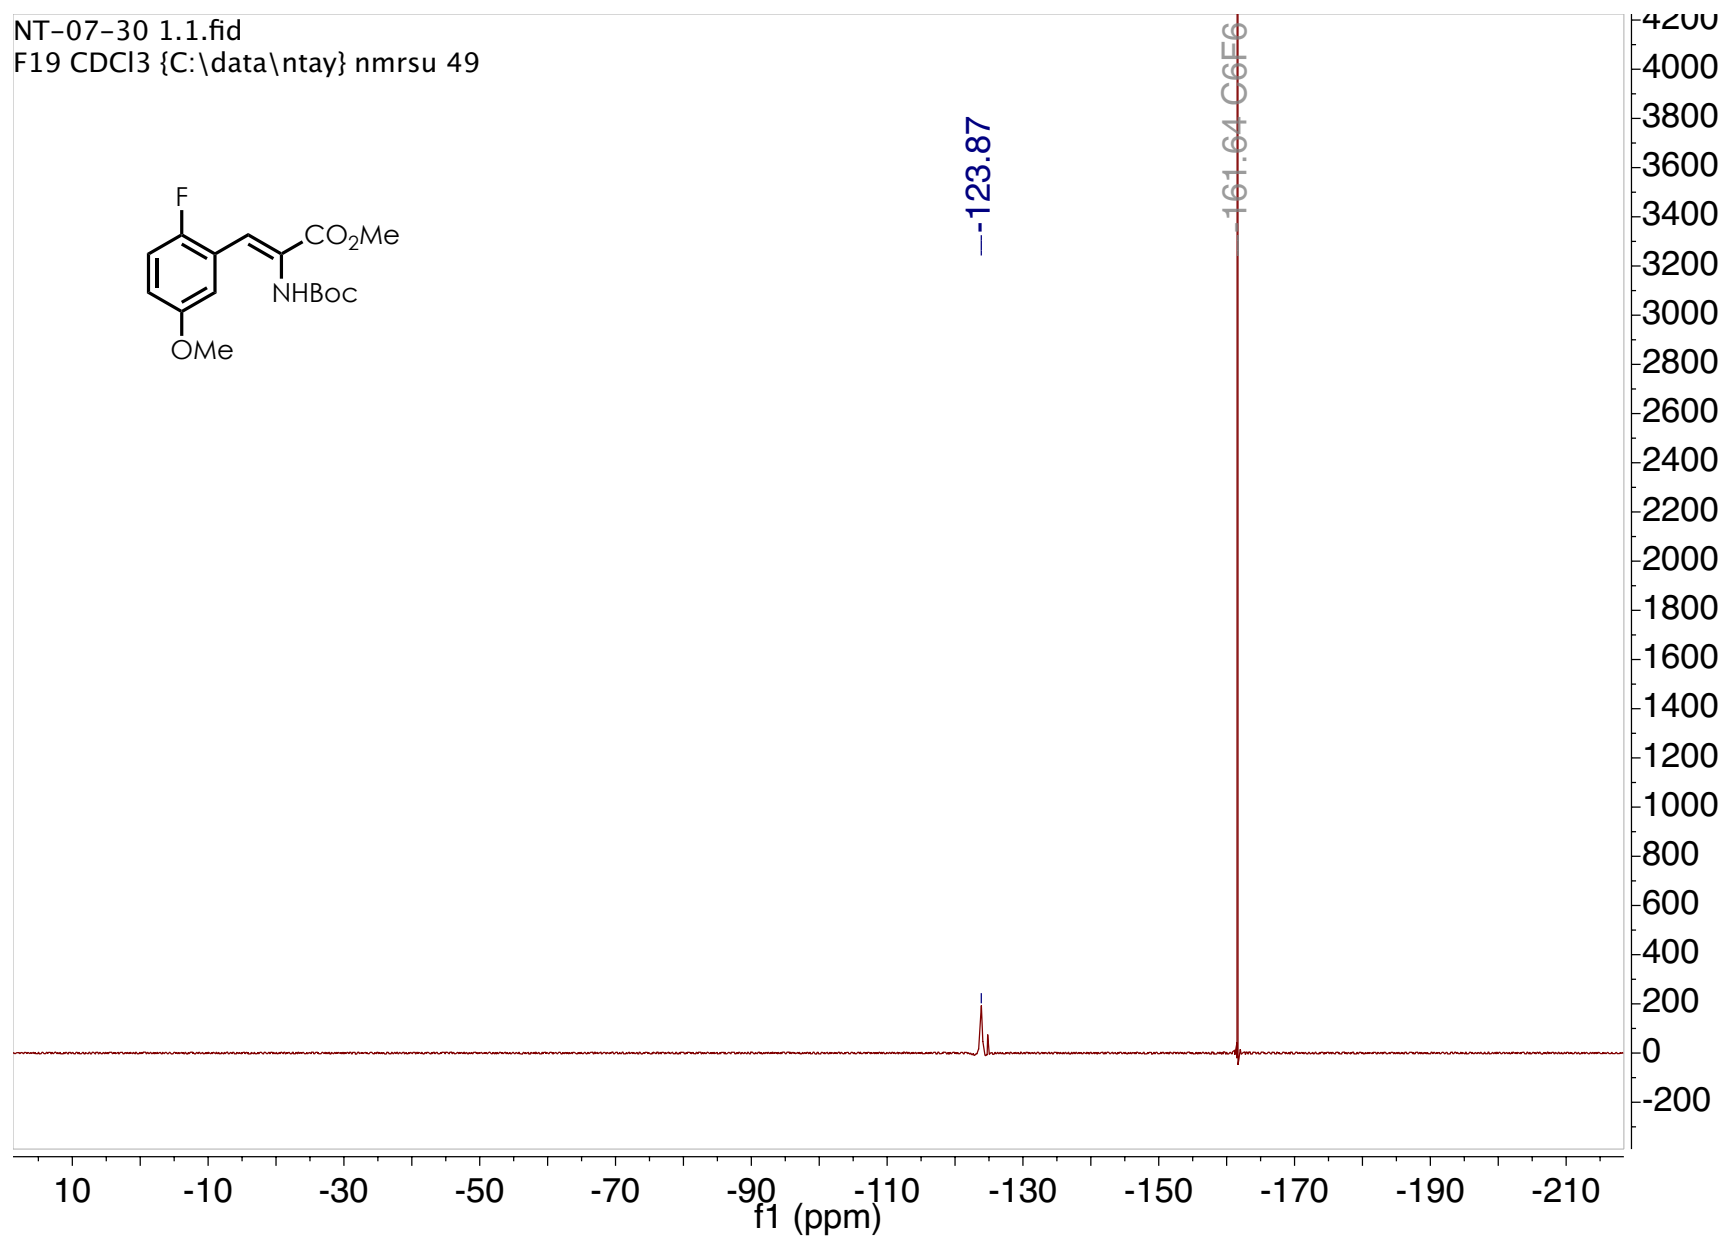

NT-07-31 4.1.fid  
 Nicewicz  
 5106082  
 ntay  
 NT-07-31

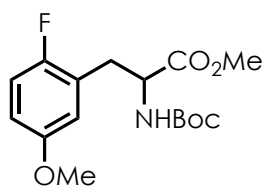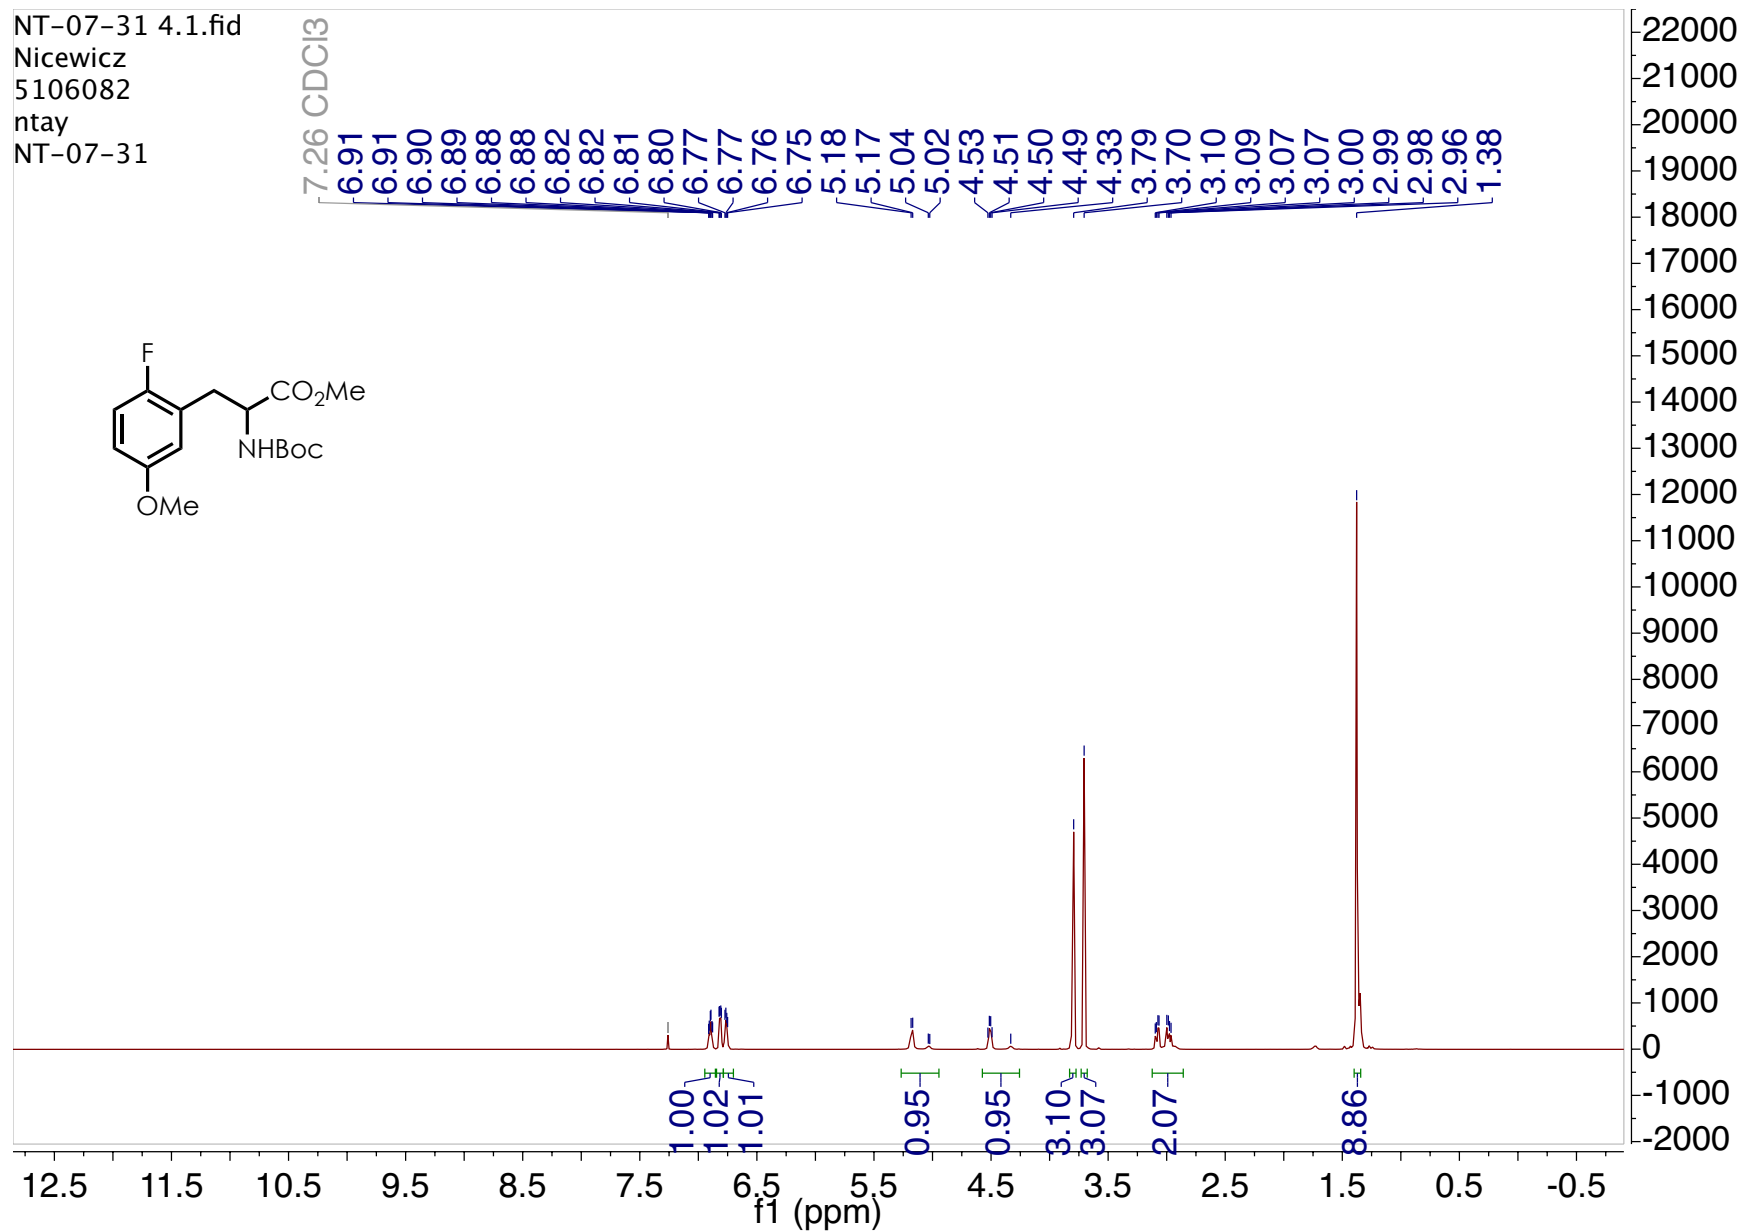

NT-07-31 3.2.fid  
Nicewicz  
5106082  
ntay  
NT-07-31

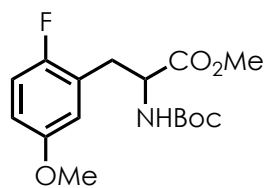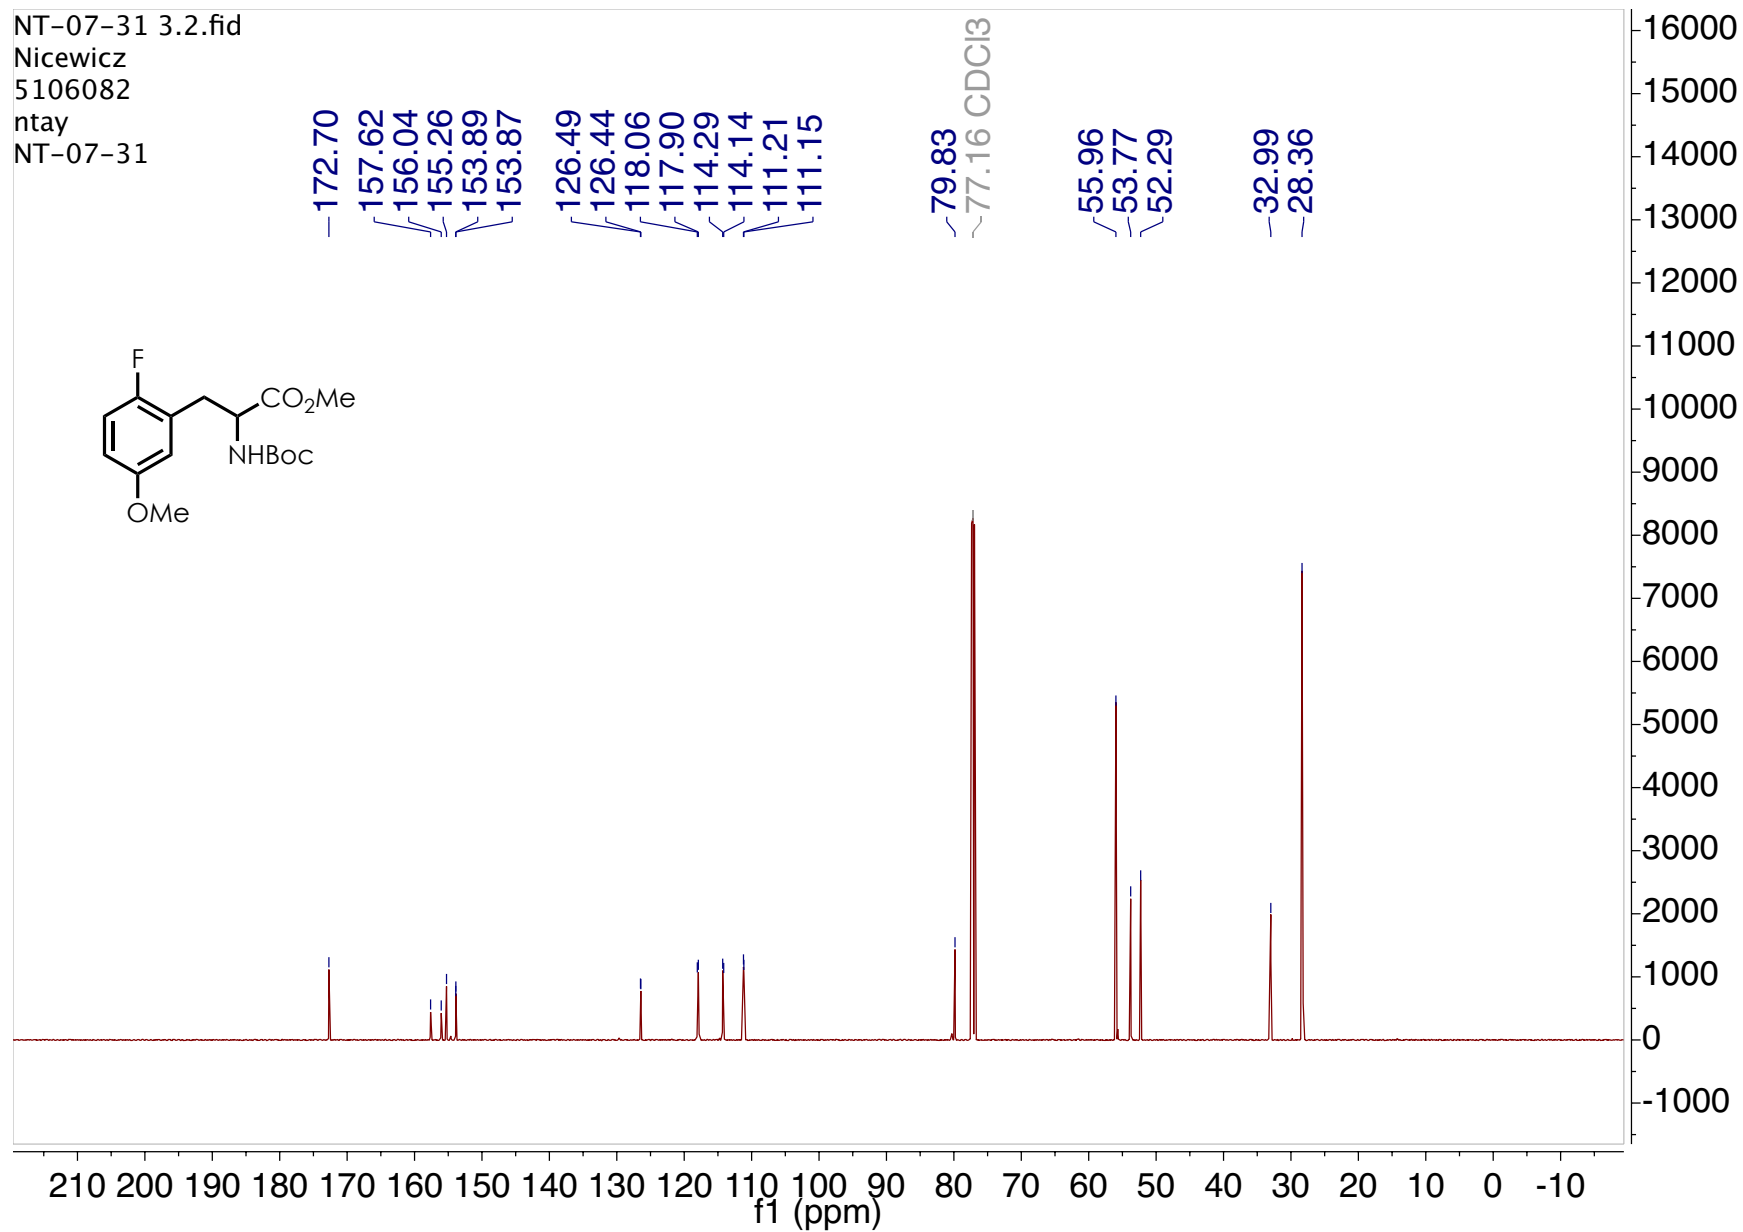

NT-07-31 1.1.fid  
F19 CDCl3 {C:\data\ntay} nmrsu 50

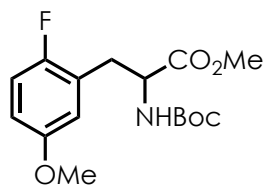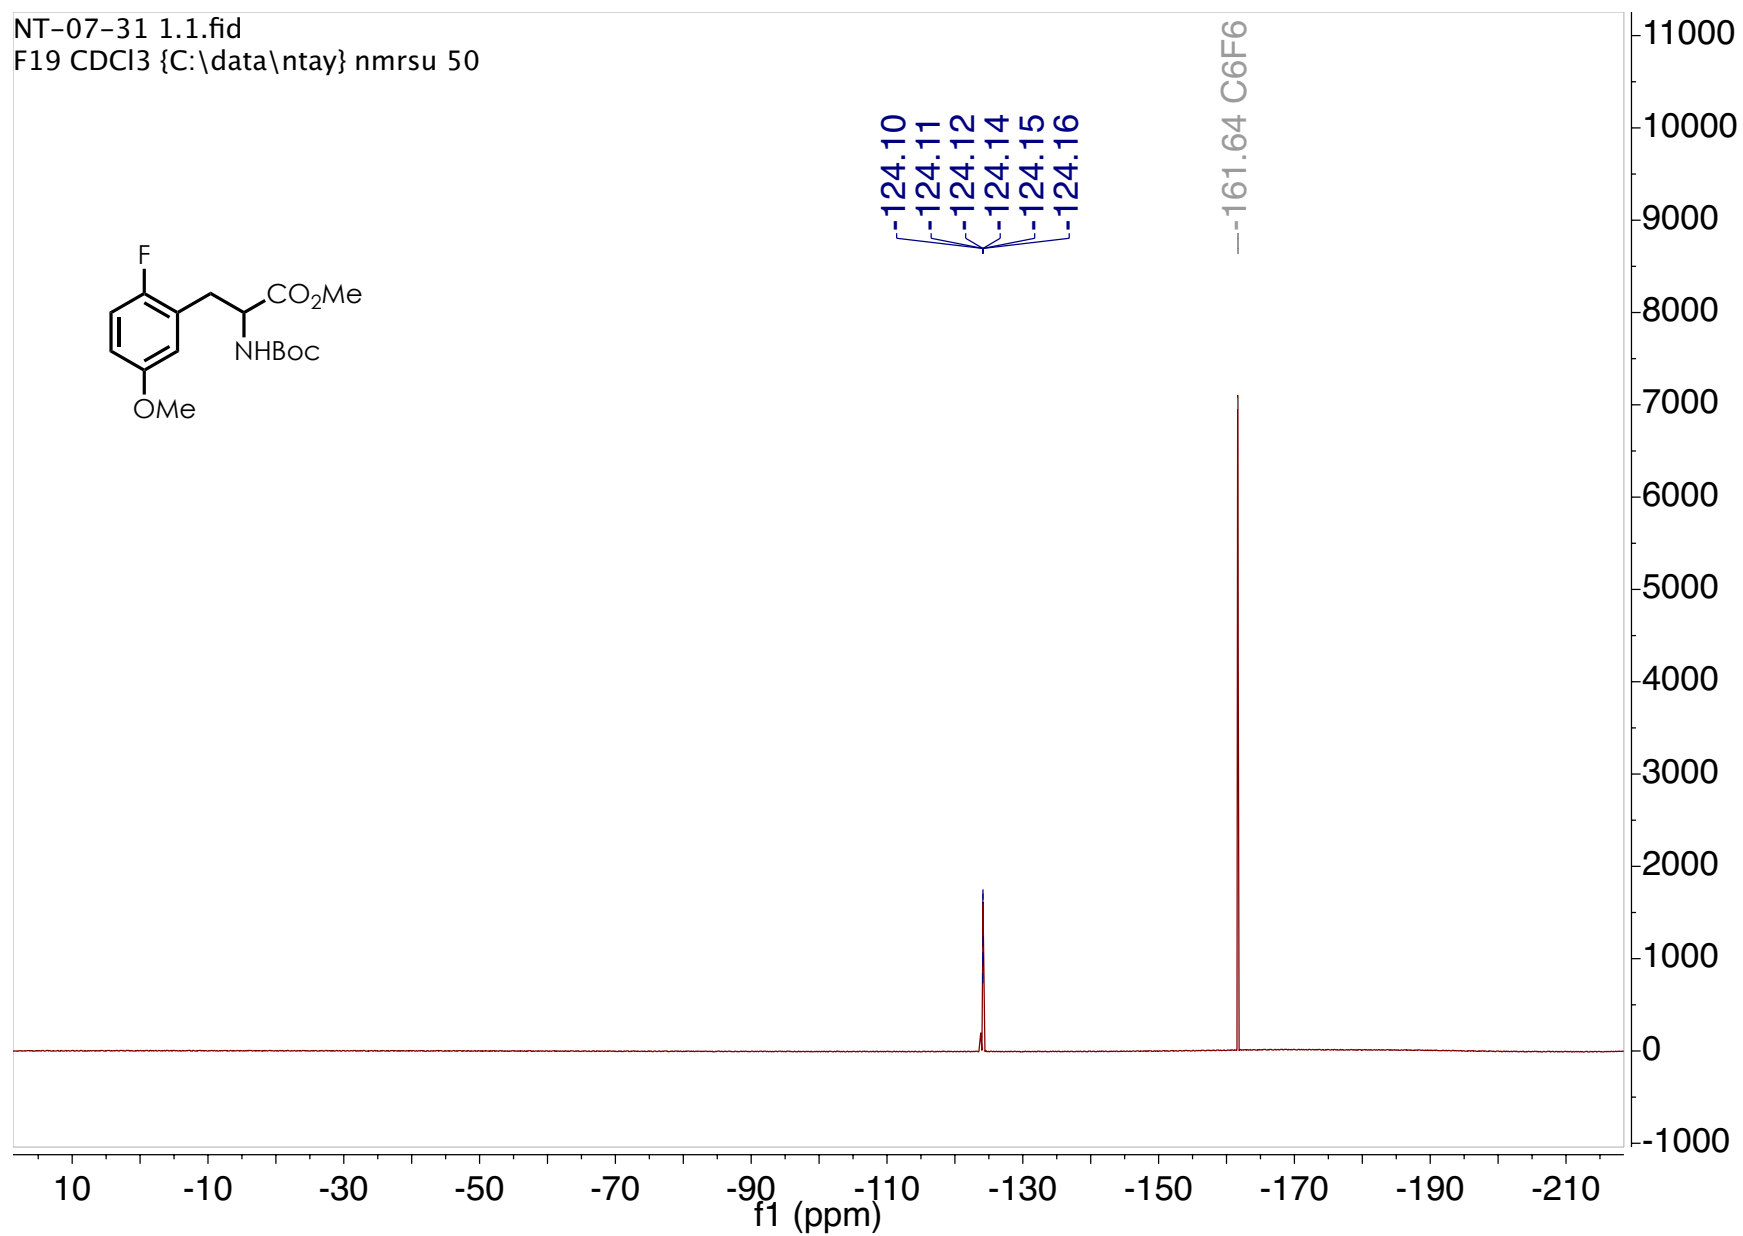

NT-07-57.1.fid  
Nicewicz  
5106082  
ntay  
NT-07-57

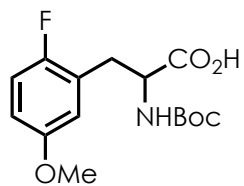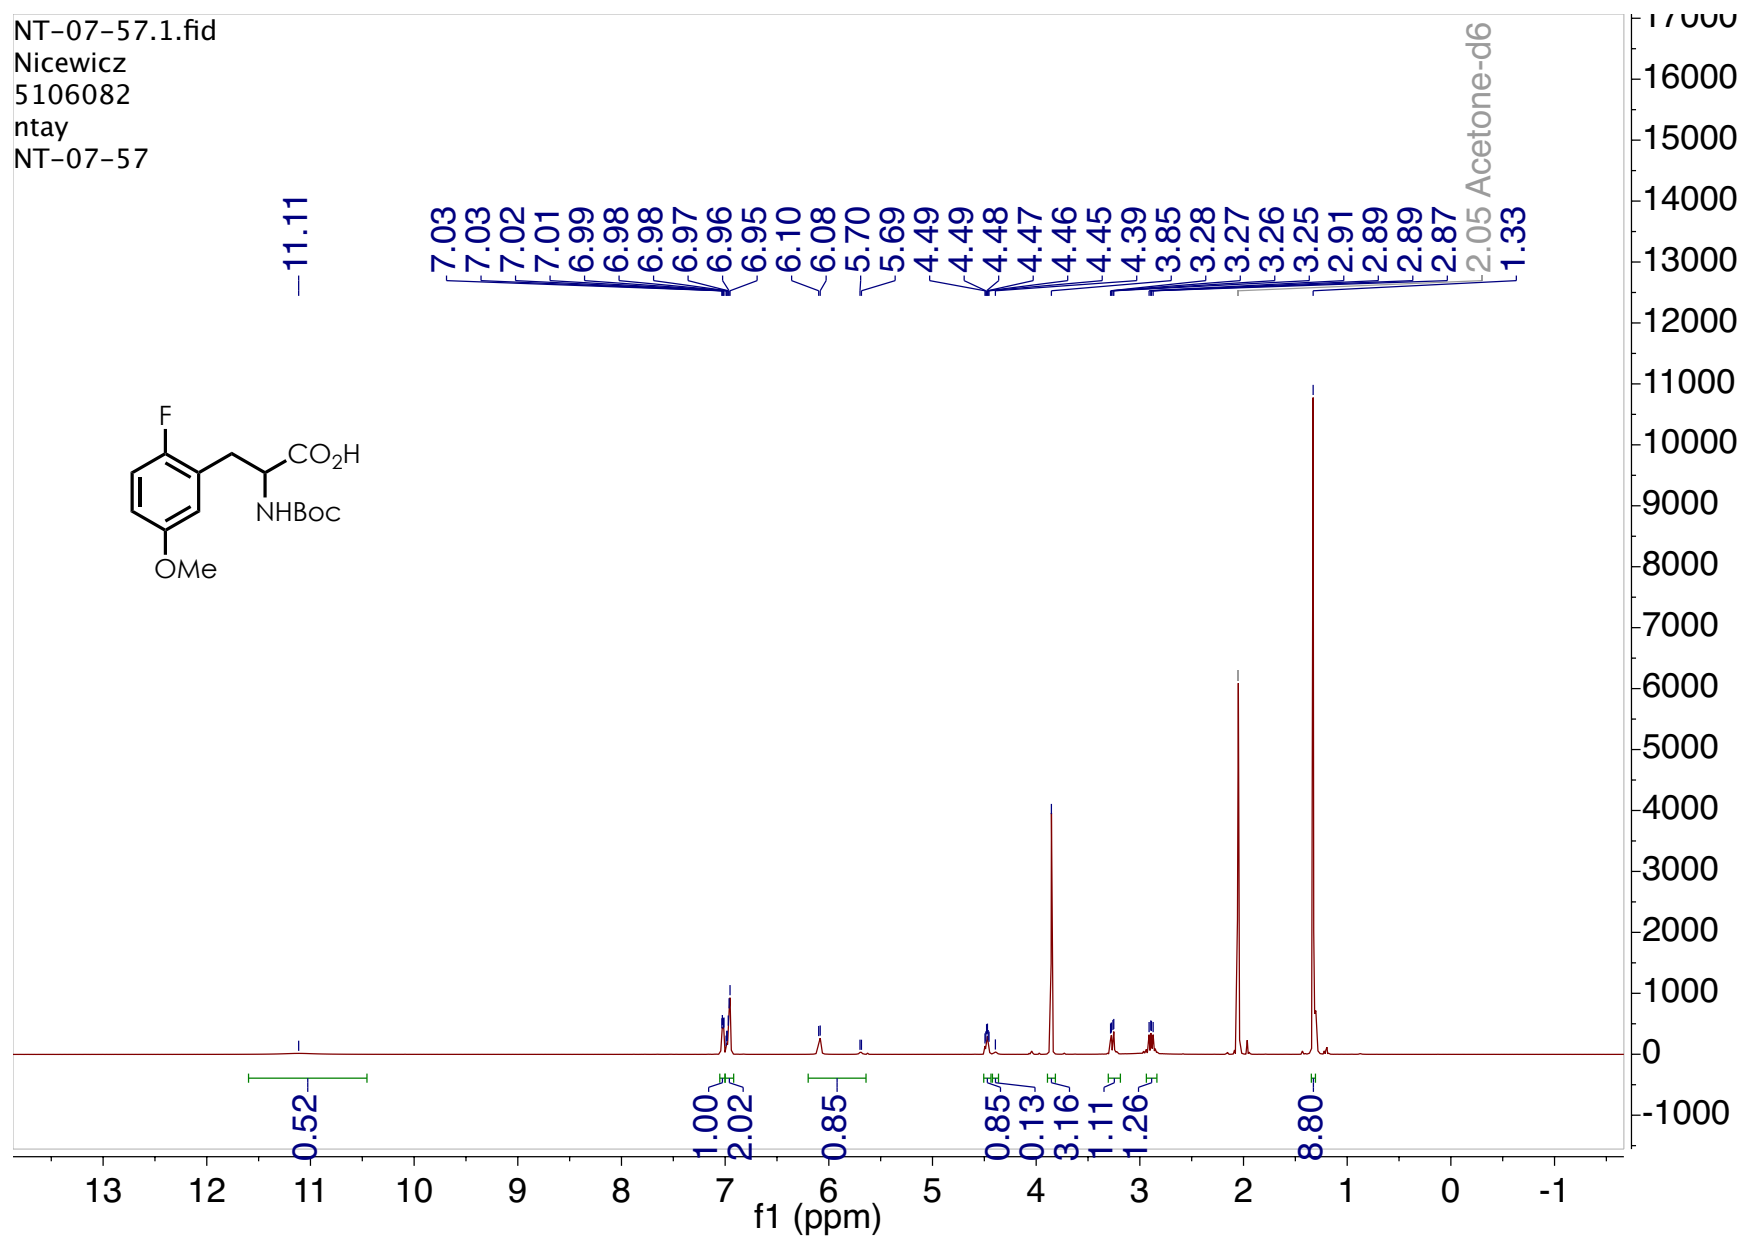

NT-07-57 2.2.fid  
 Nicewicz  
 5106082  
 ntay  
 NT-07-57

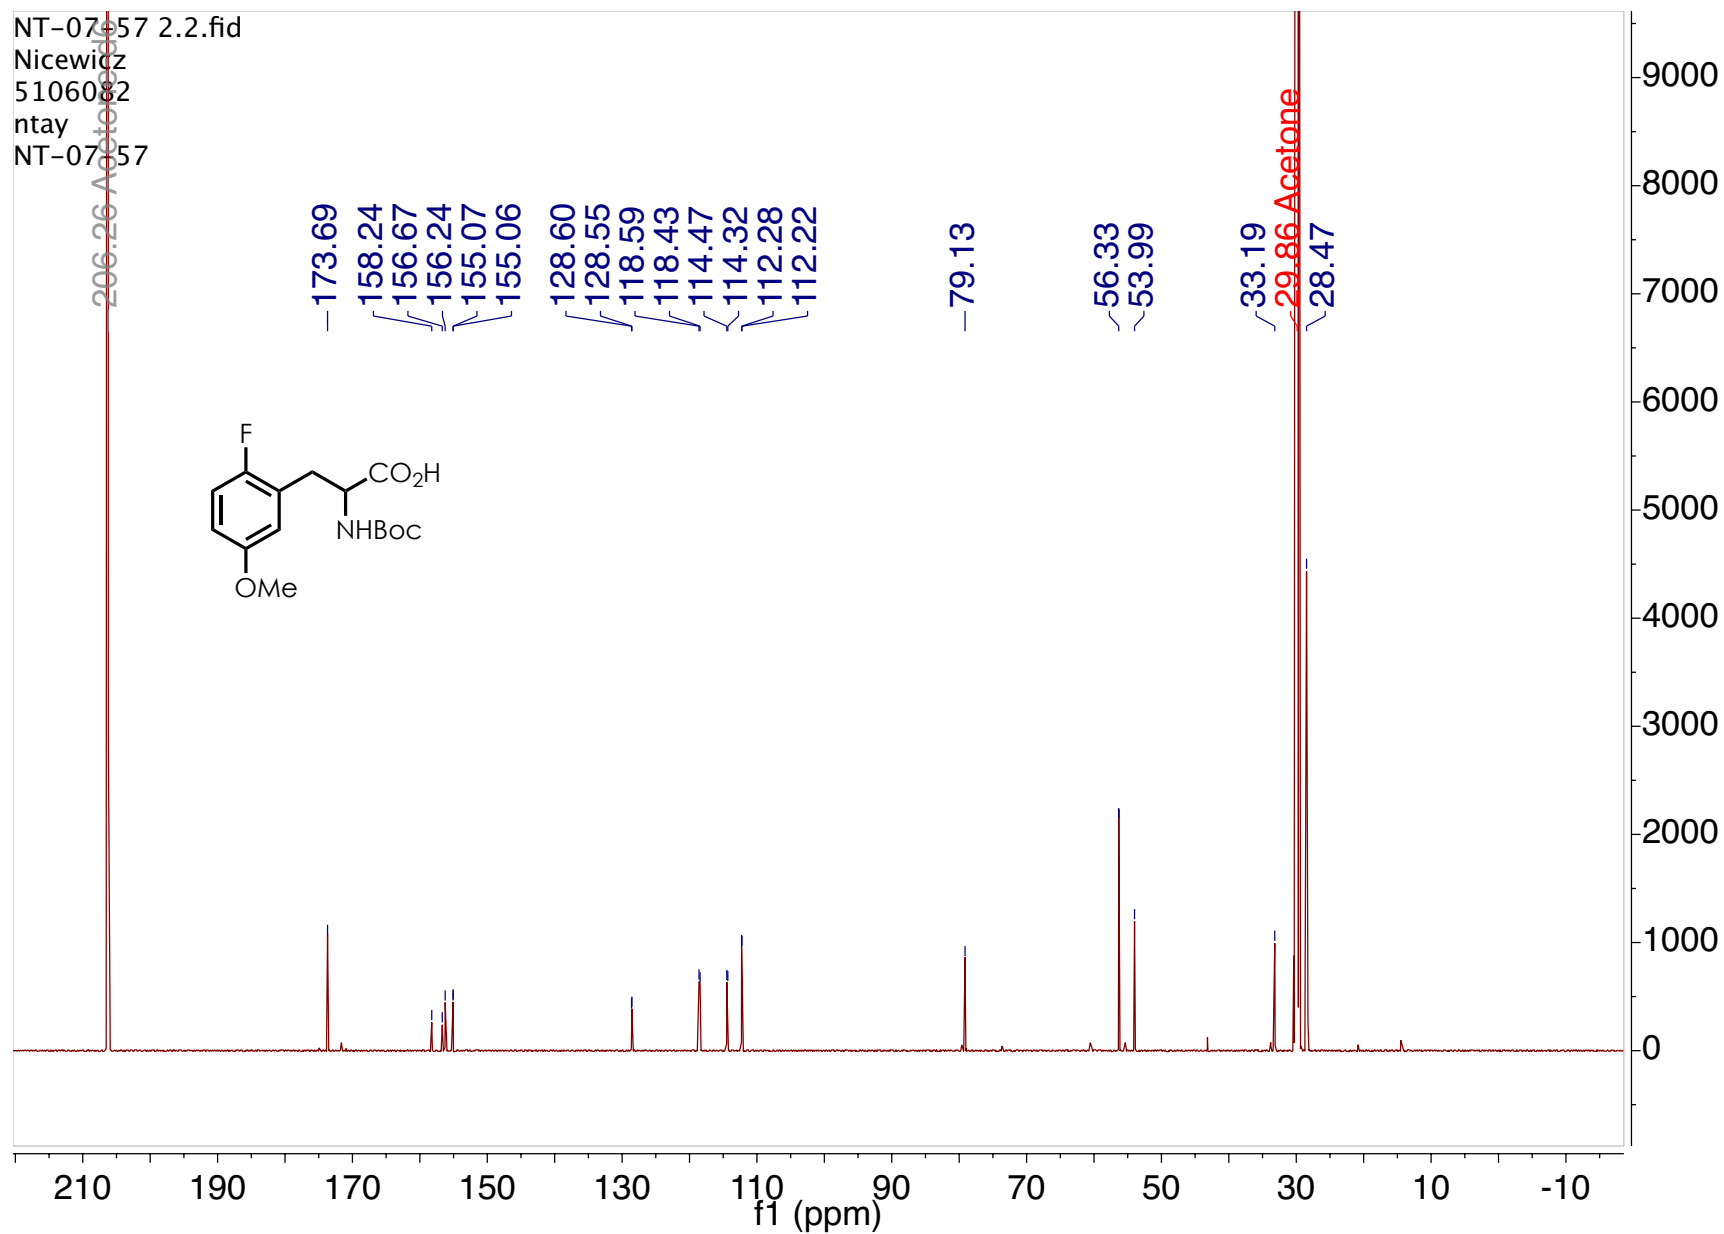

NT-07-57-19F.1.fid  
F19 Acetone {C:\data} nmrsu 1

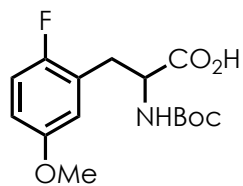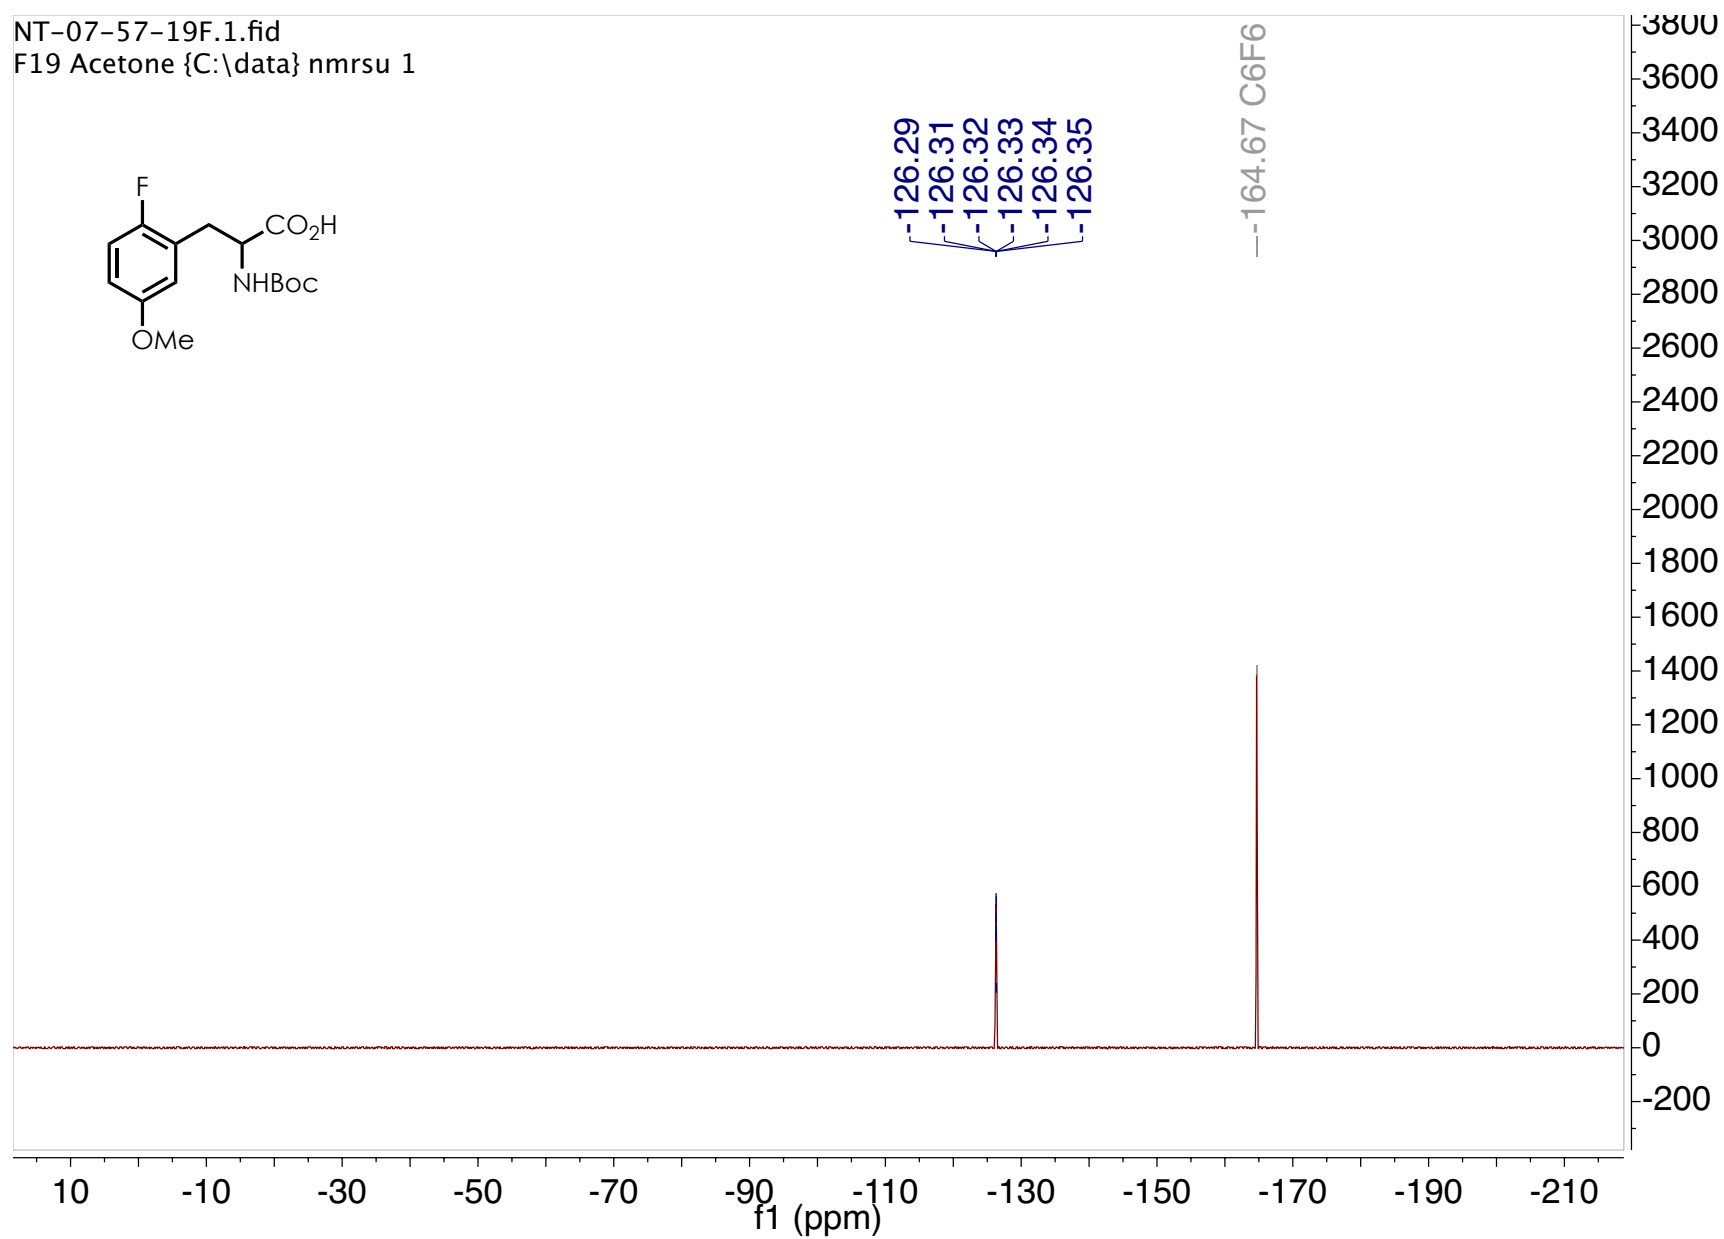

NT-07-60-dmso 3.1.fid

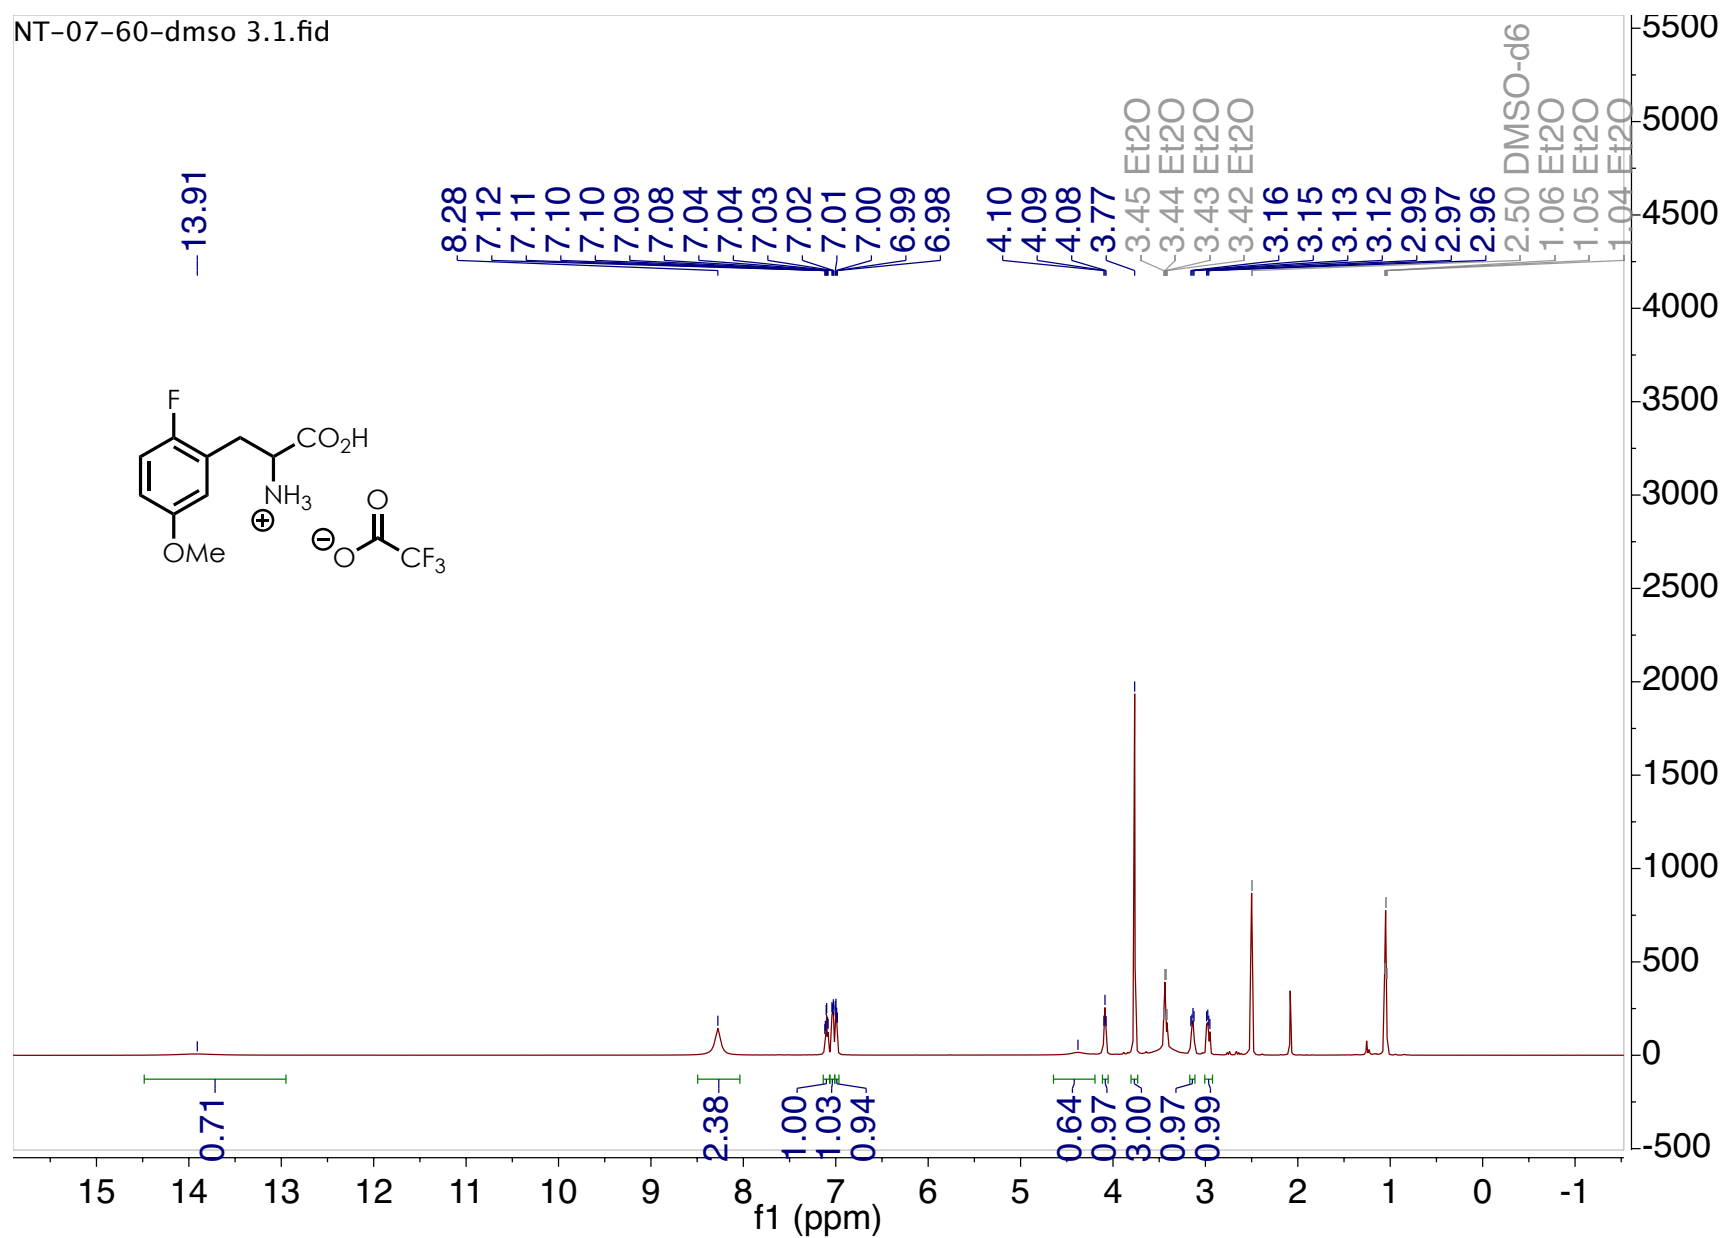

NT-07-60-dmso 3.2.fid

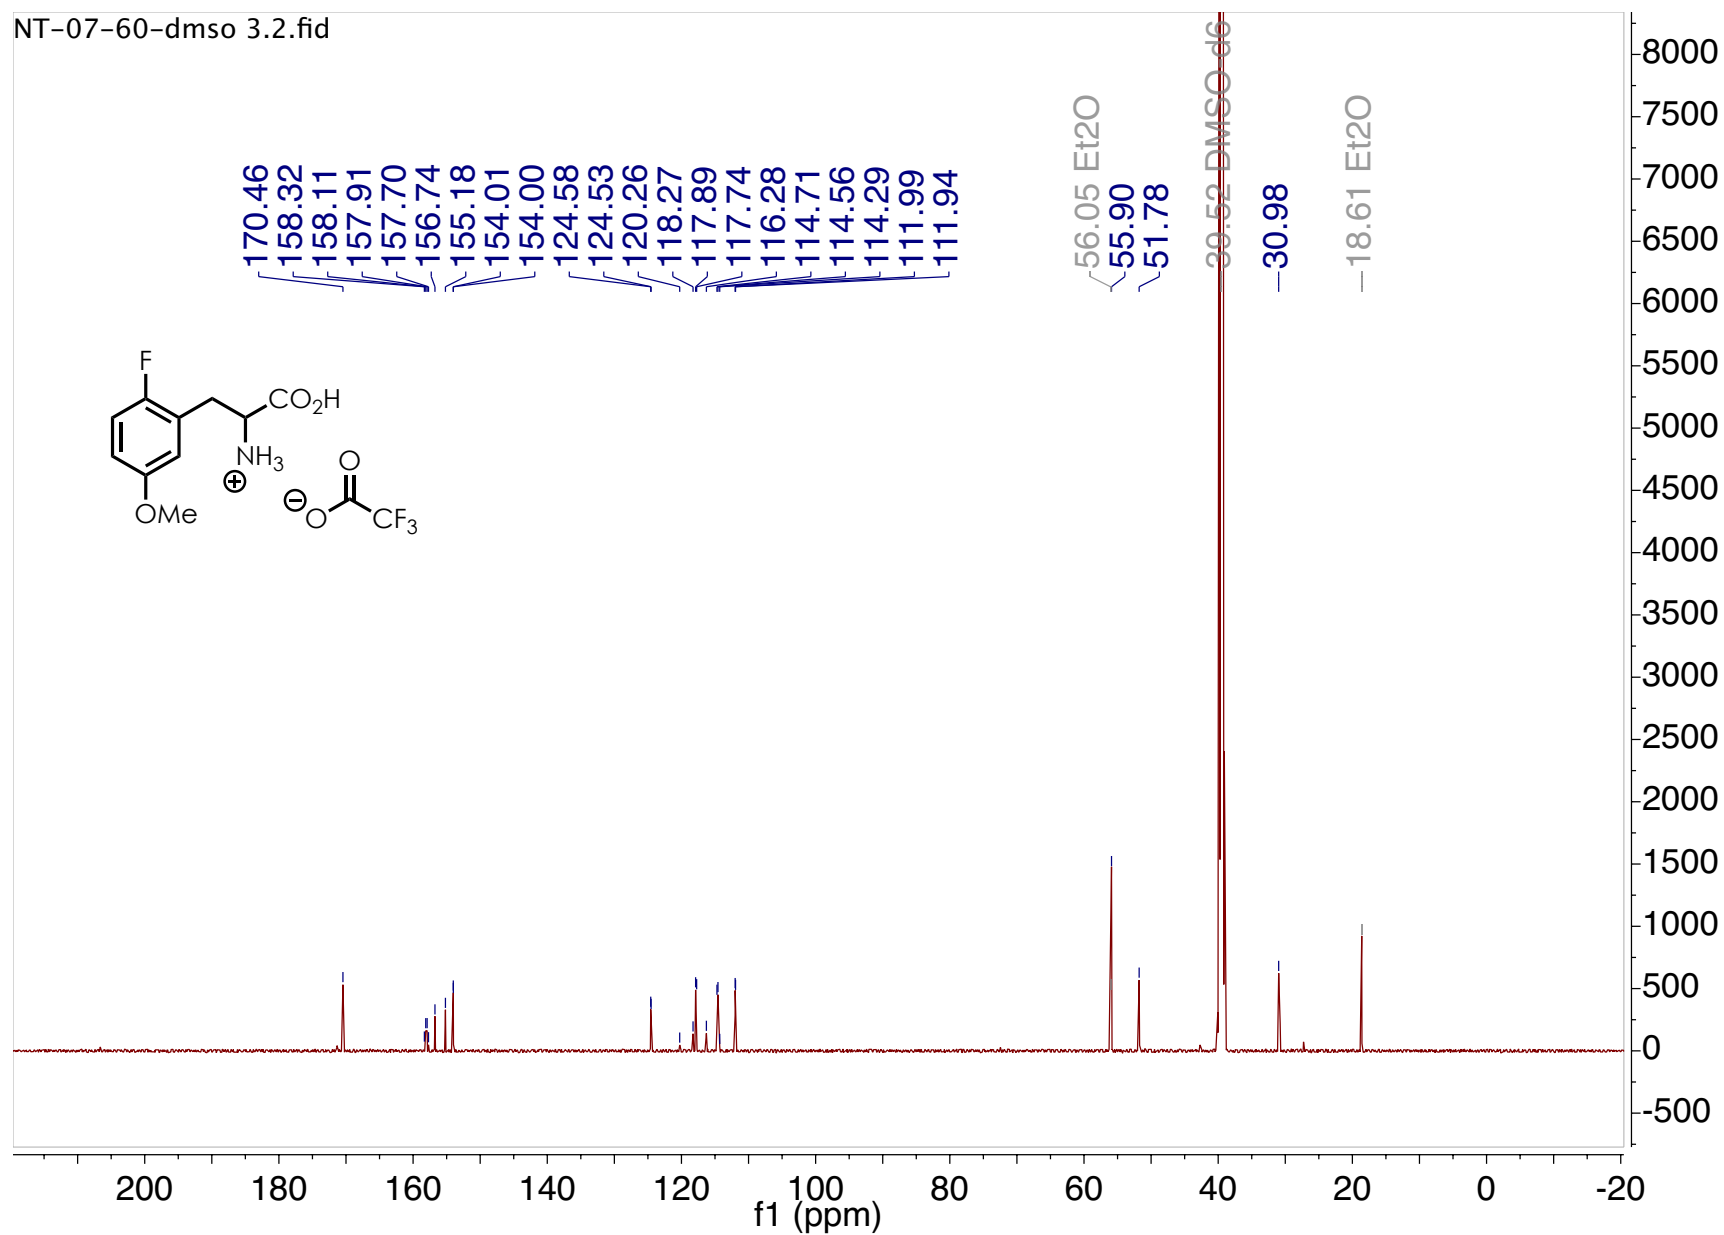

NT-07-60-dmso 2.1.fid  
F19 DMSO {C:\data\ntay} nmrsu 10

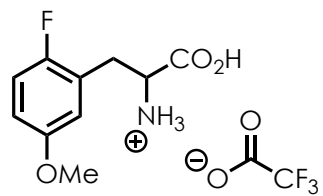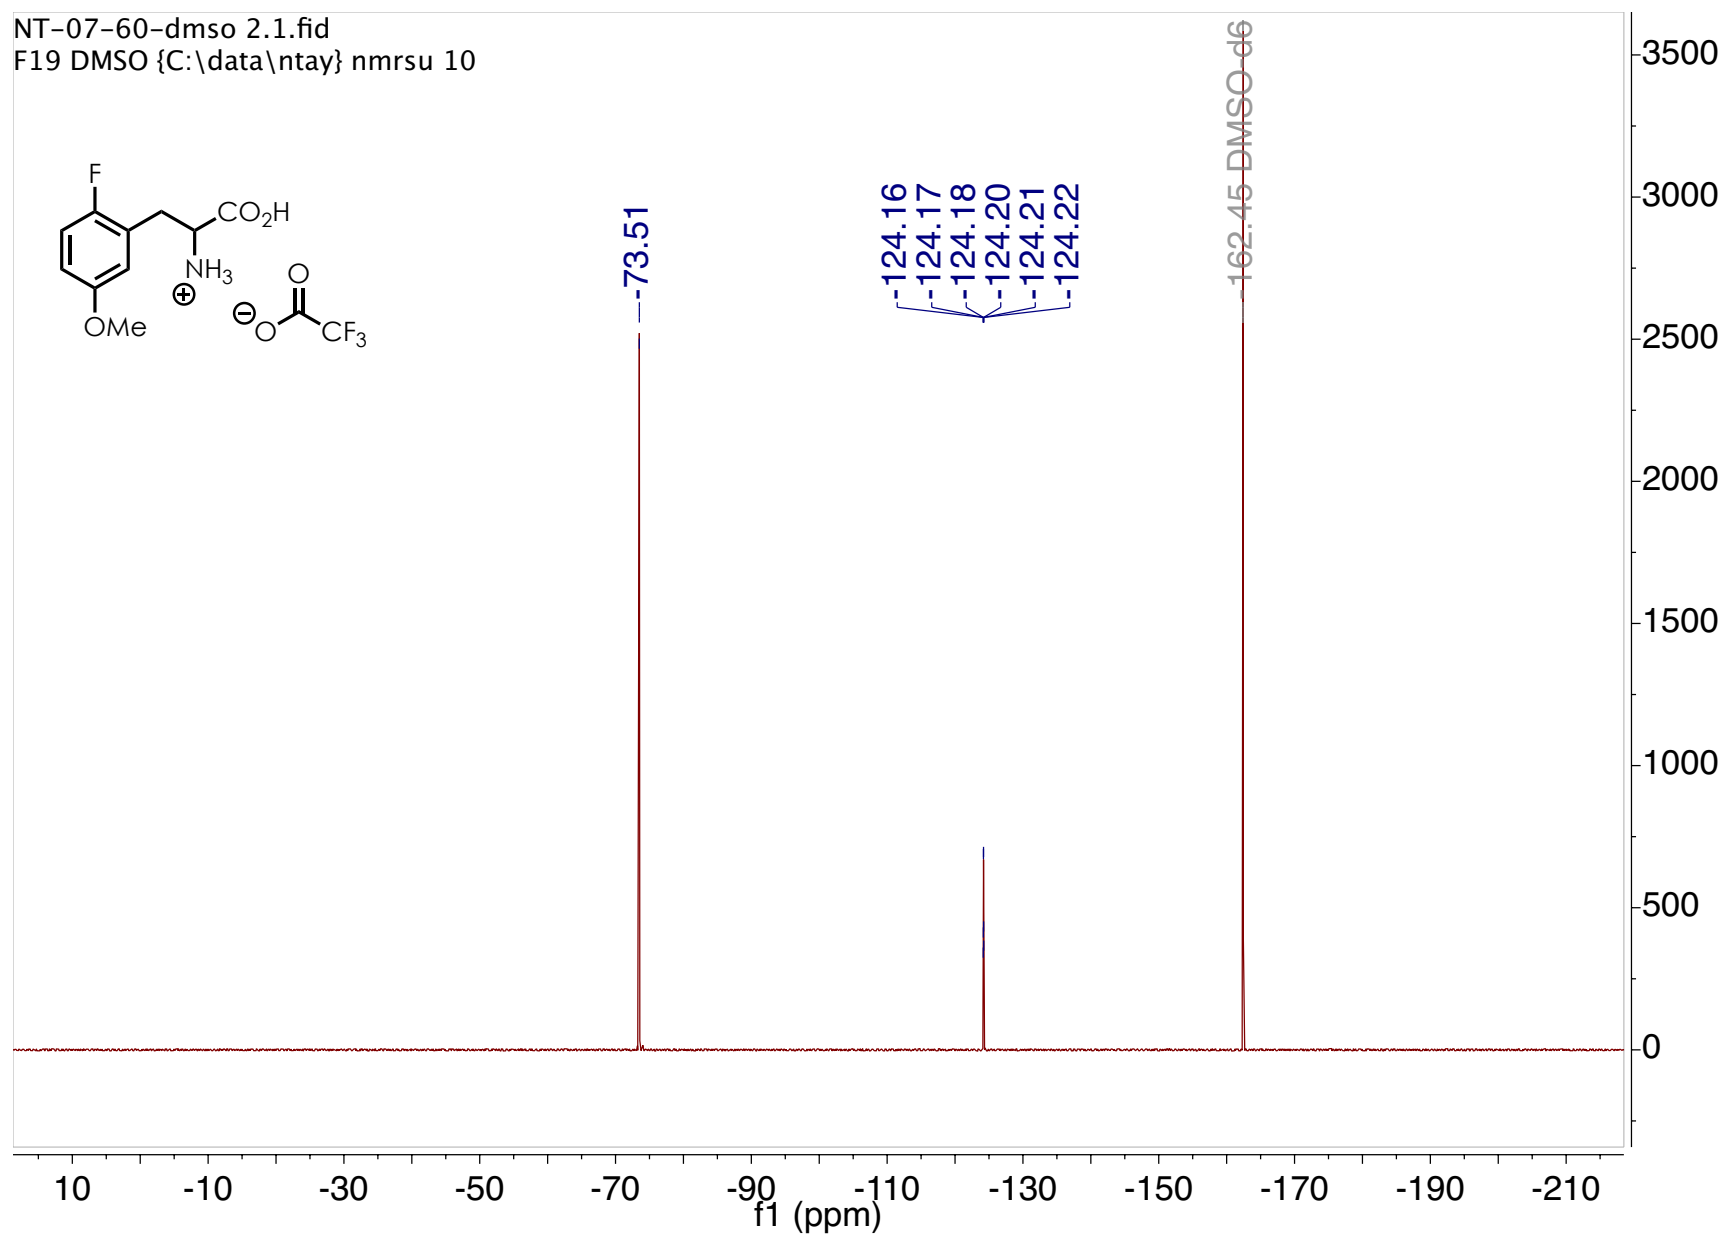

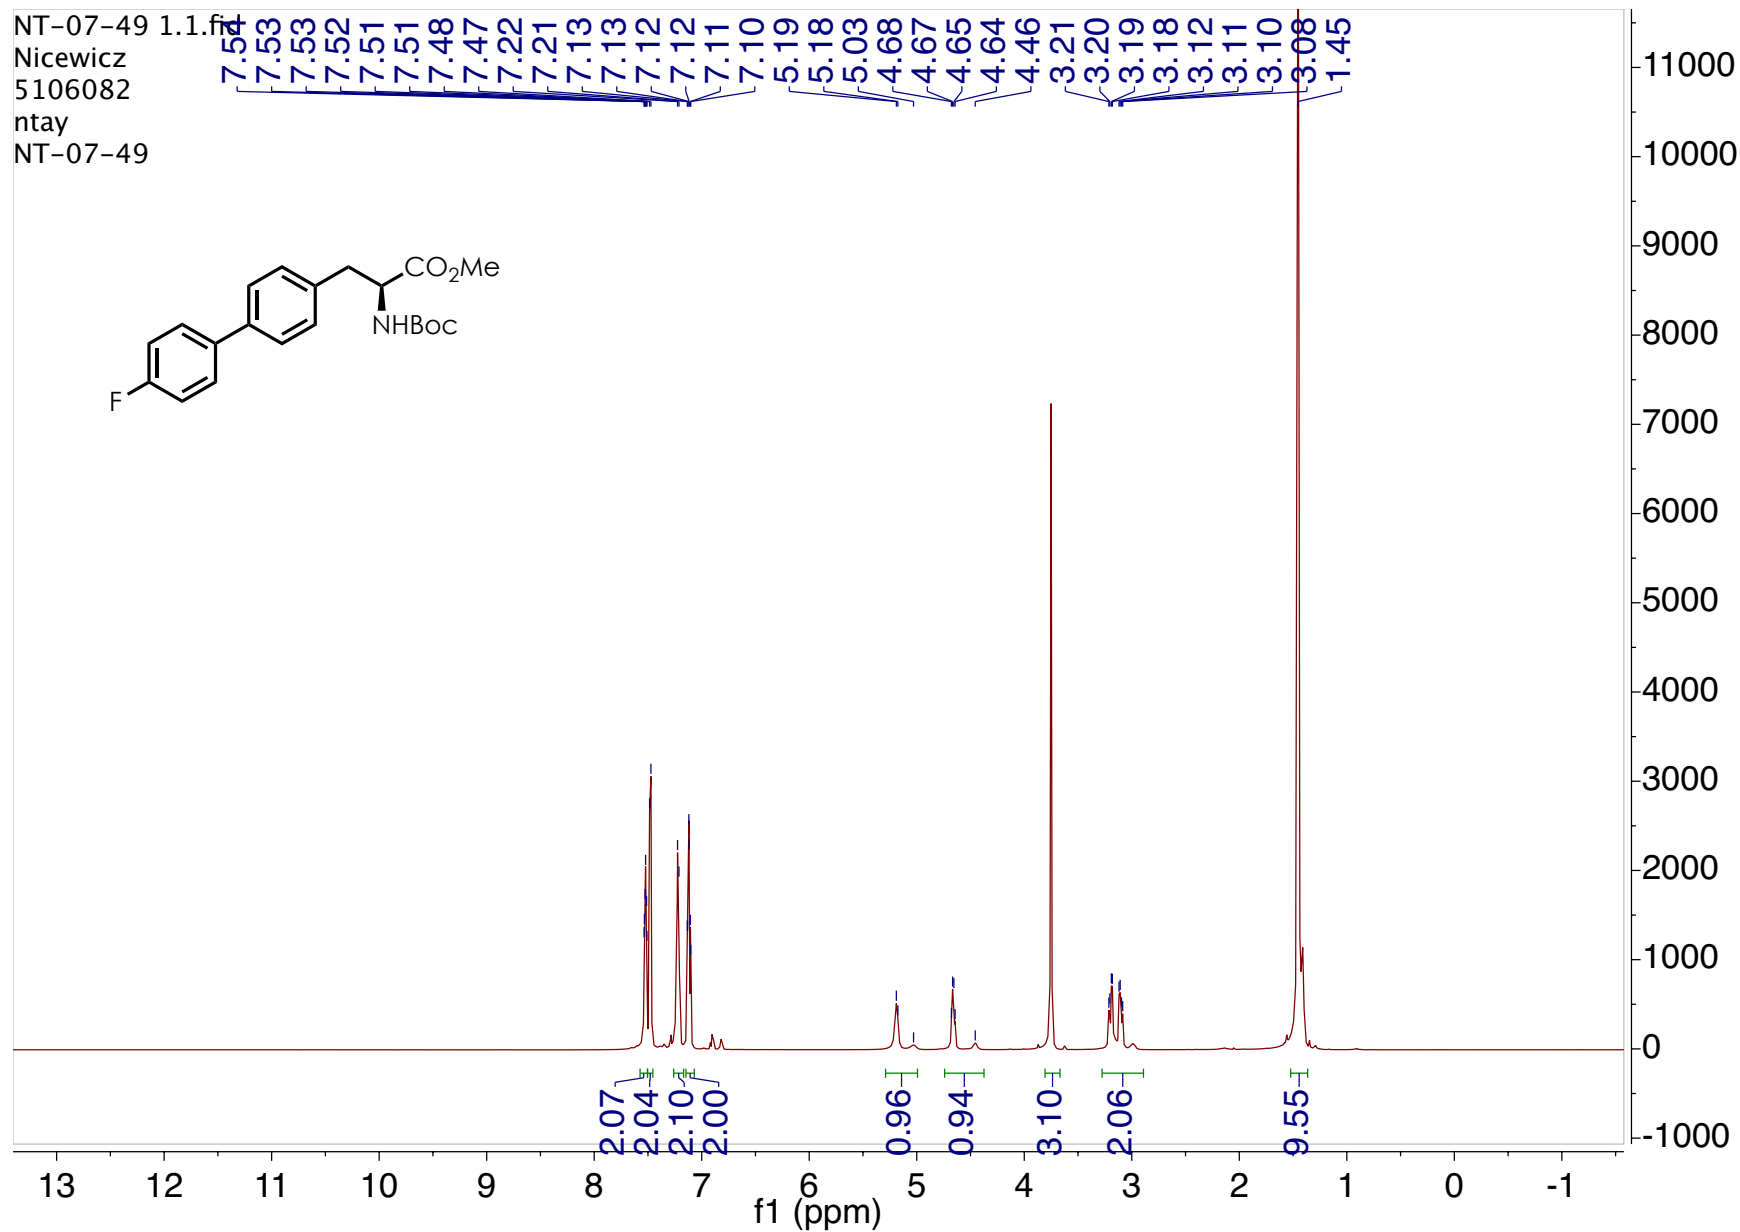

NT-07-49 2.2.fid  
Nicewicz  
5106082  
ntay  
NT-07-49

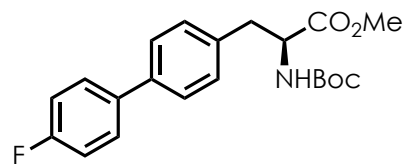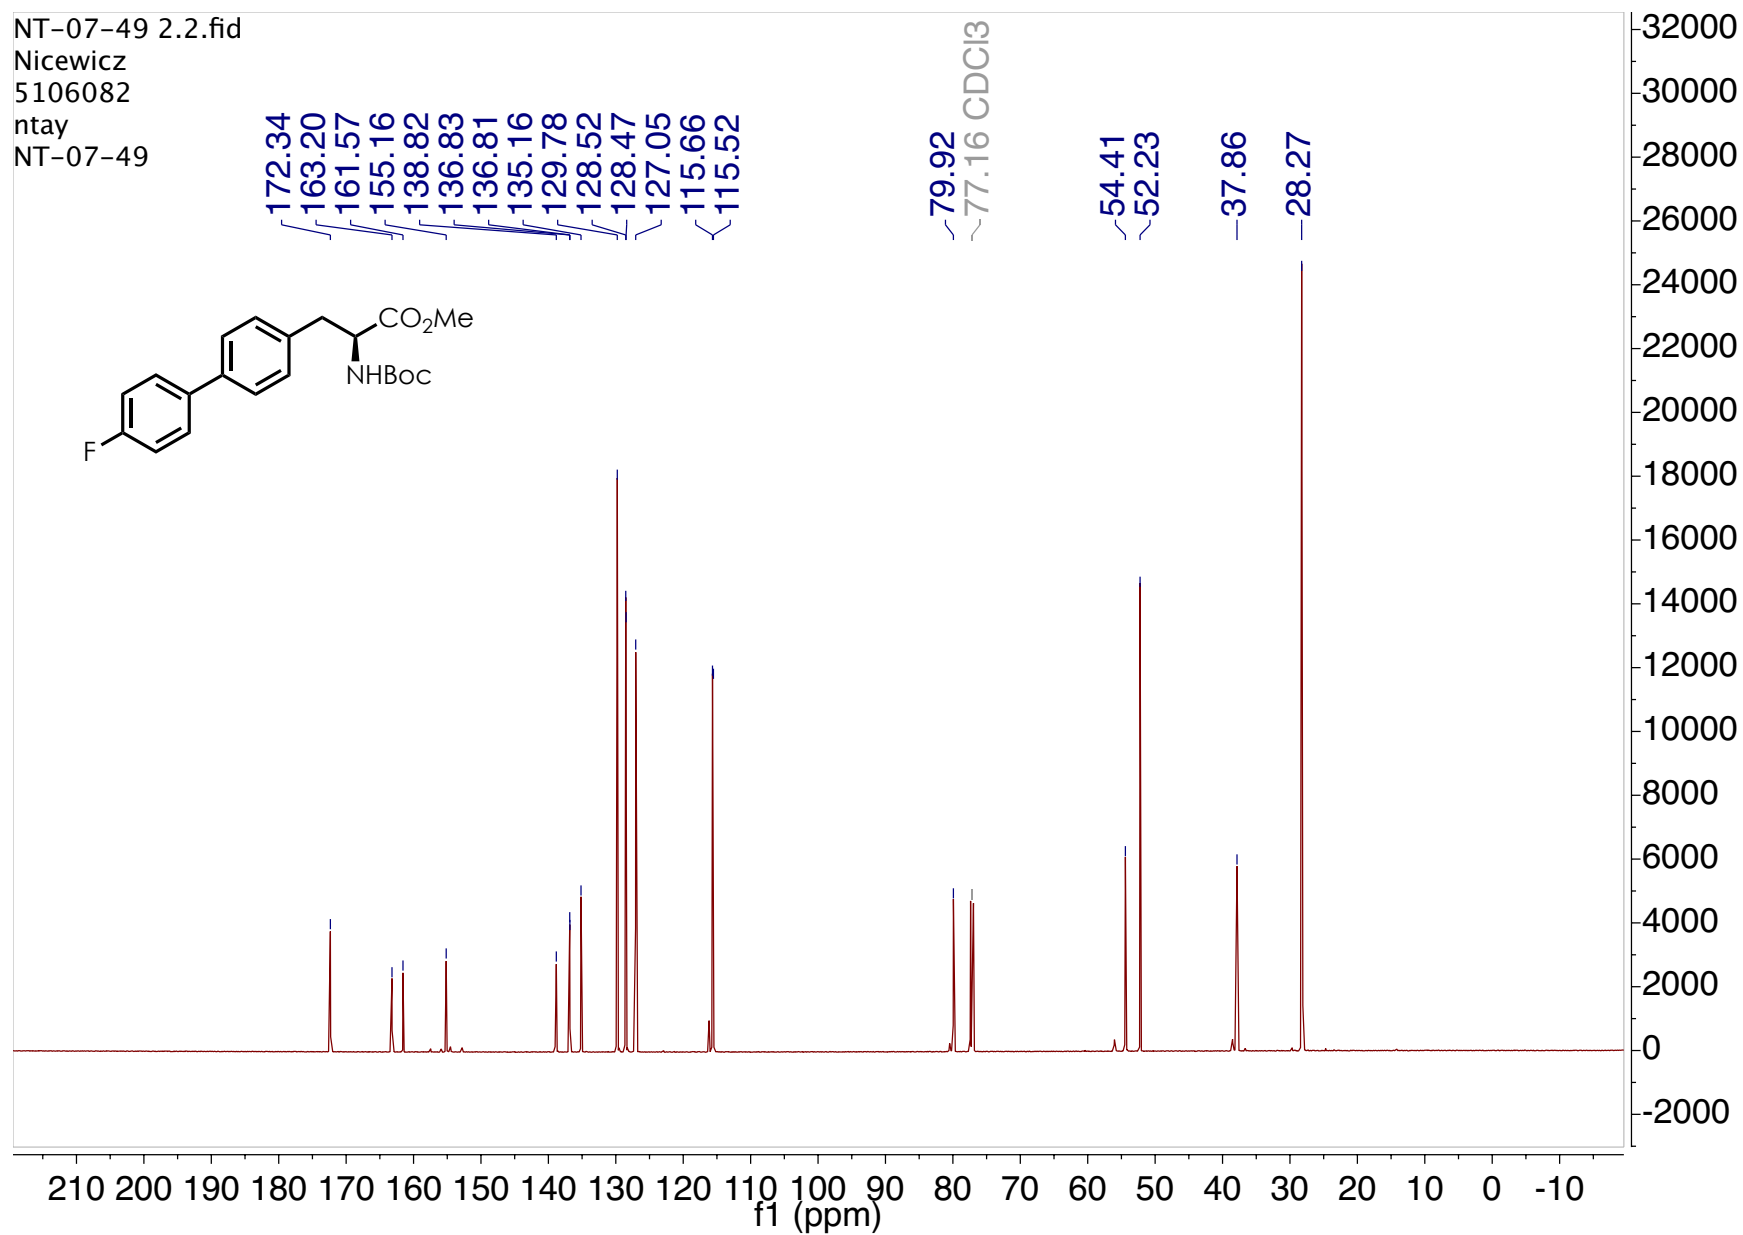

NT-07-49-19F.1.fid

F19 CDCl<sub>3</sub> {C:\data\ntay} nmrsu 56

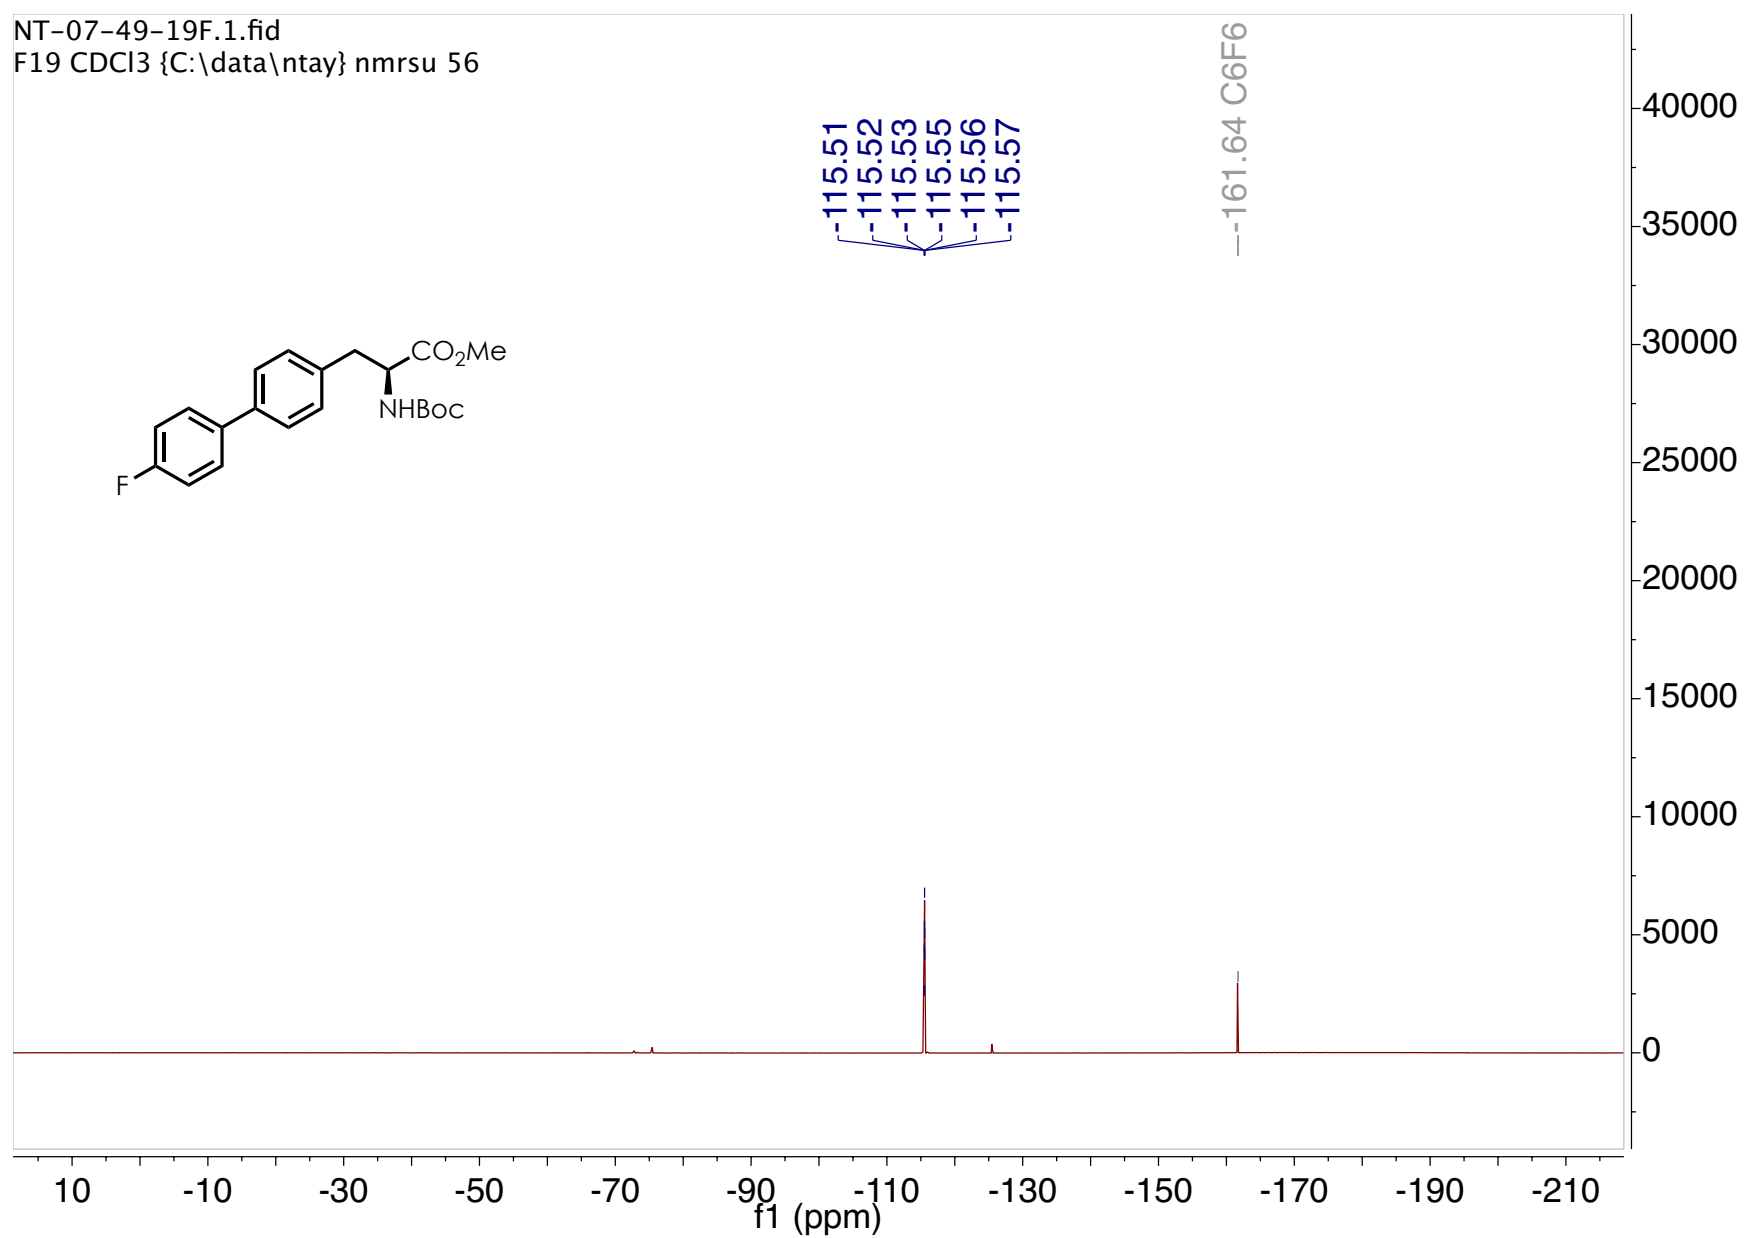

NT-07-65-mecn-1H.1.fid

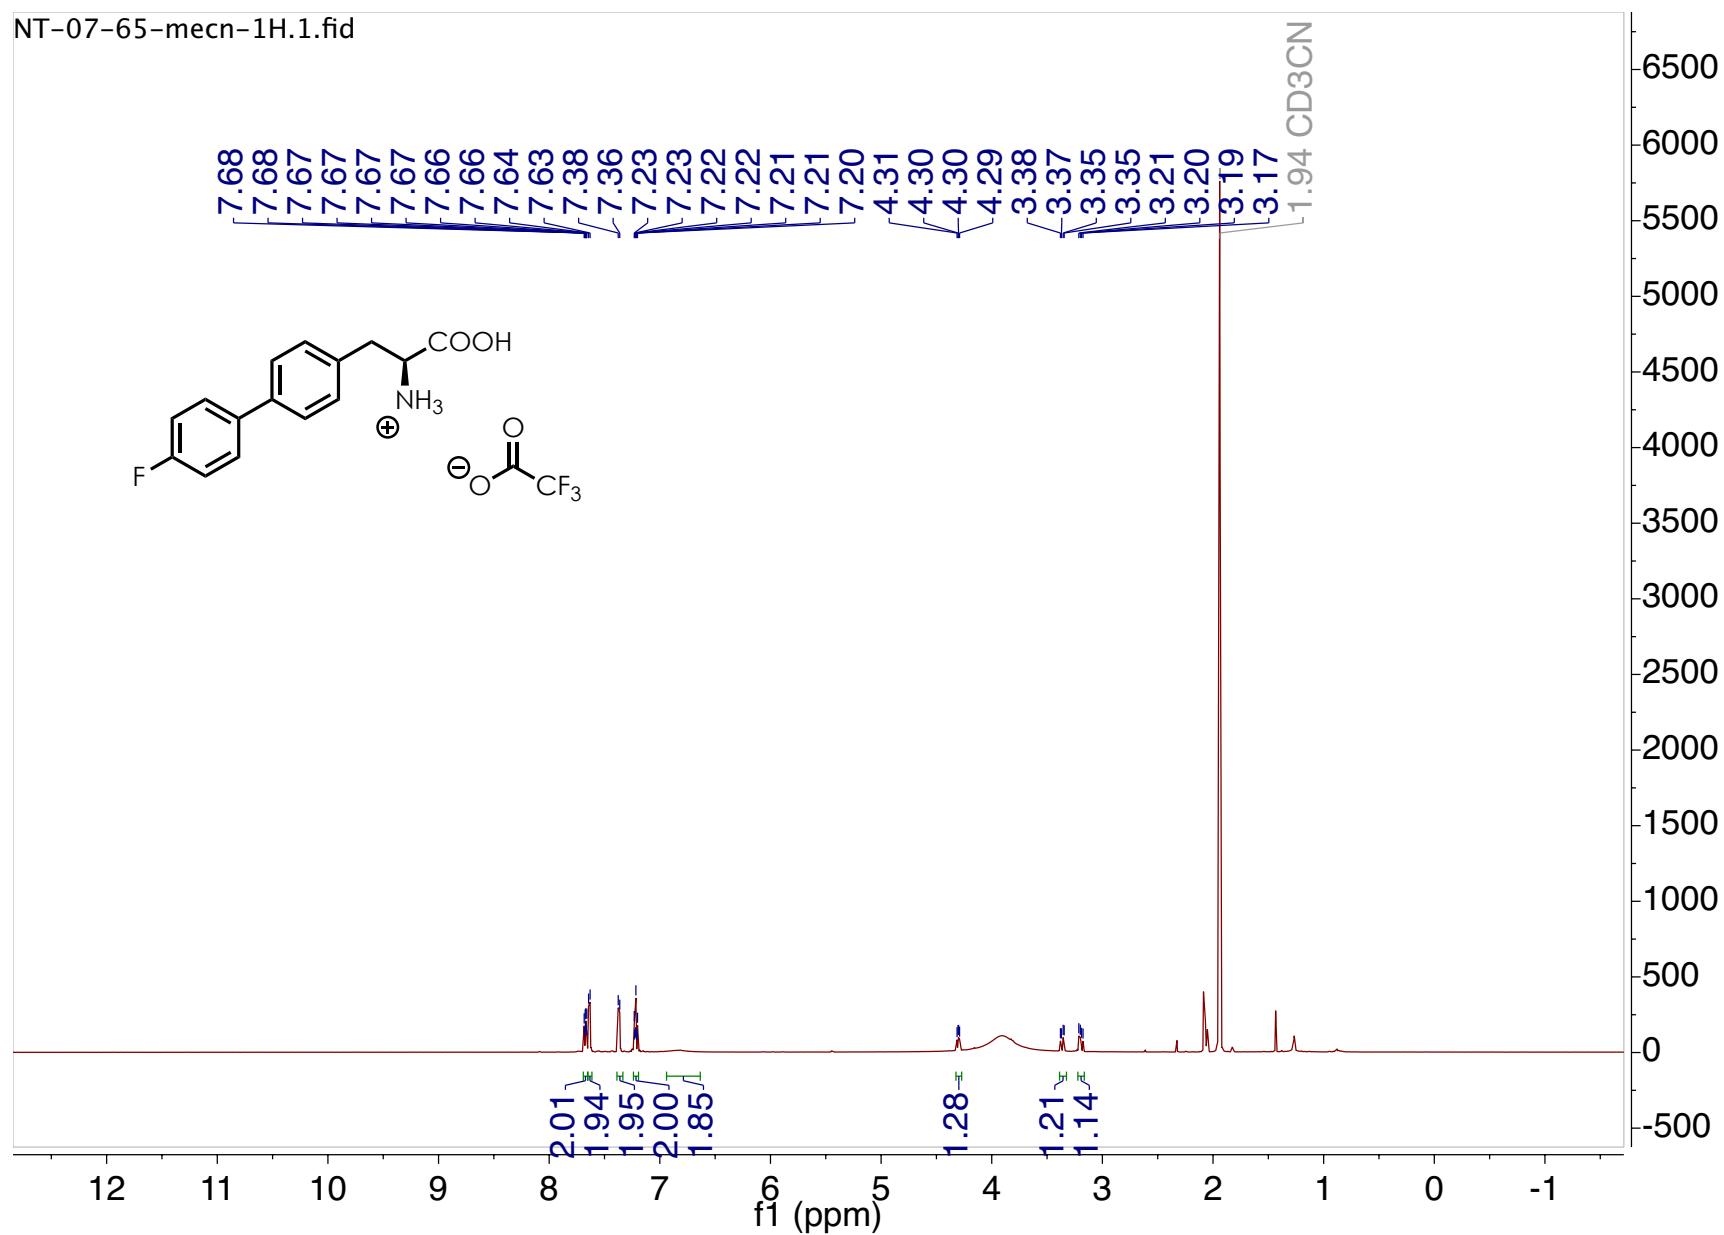

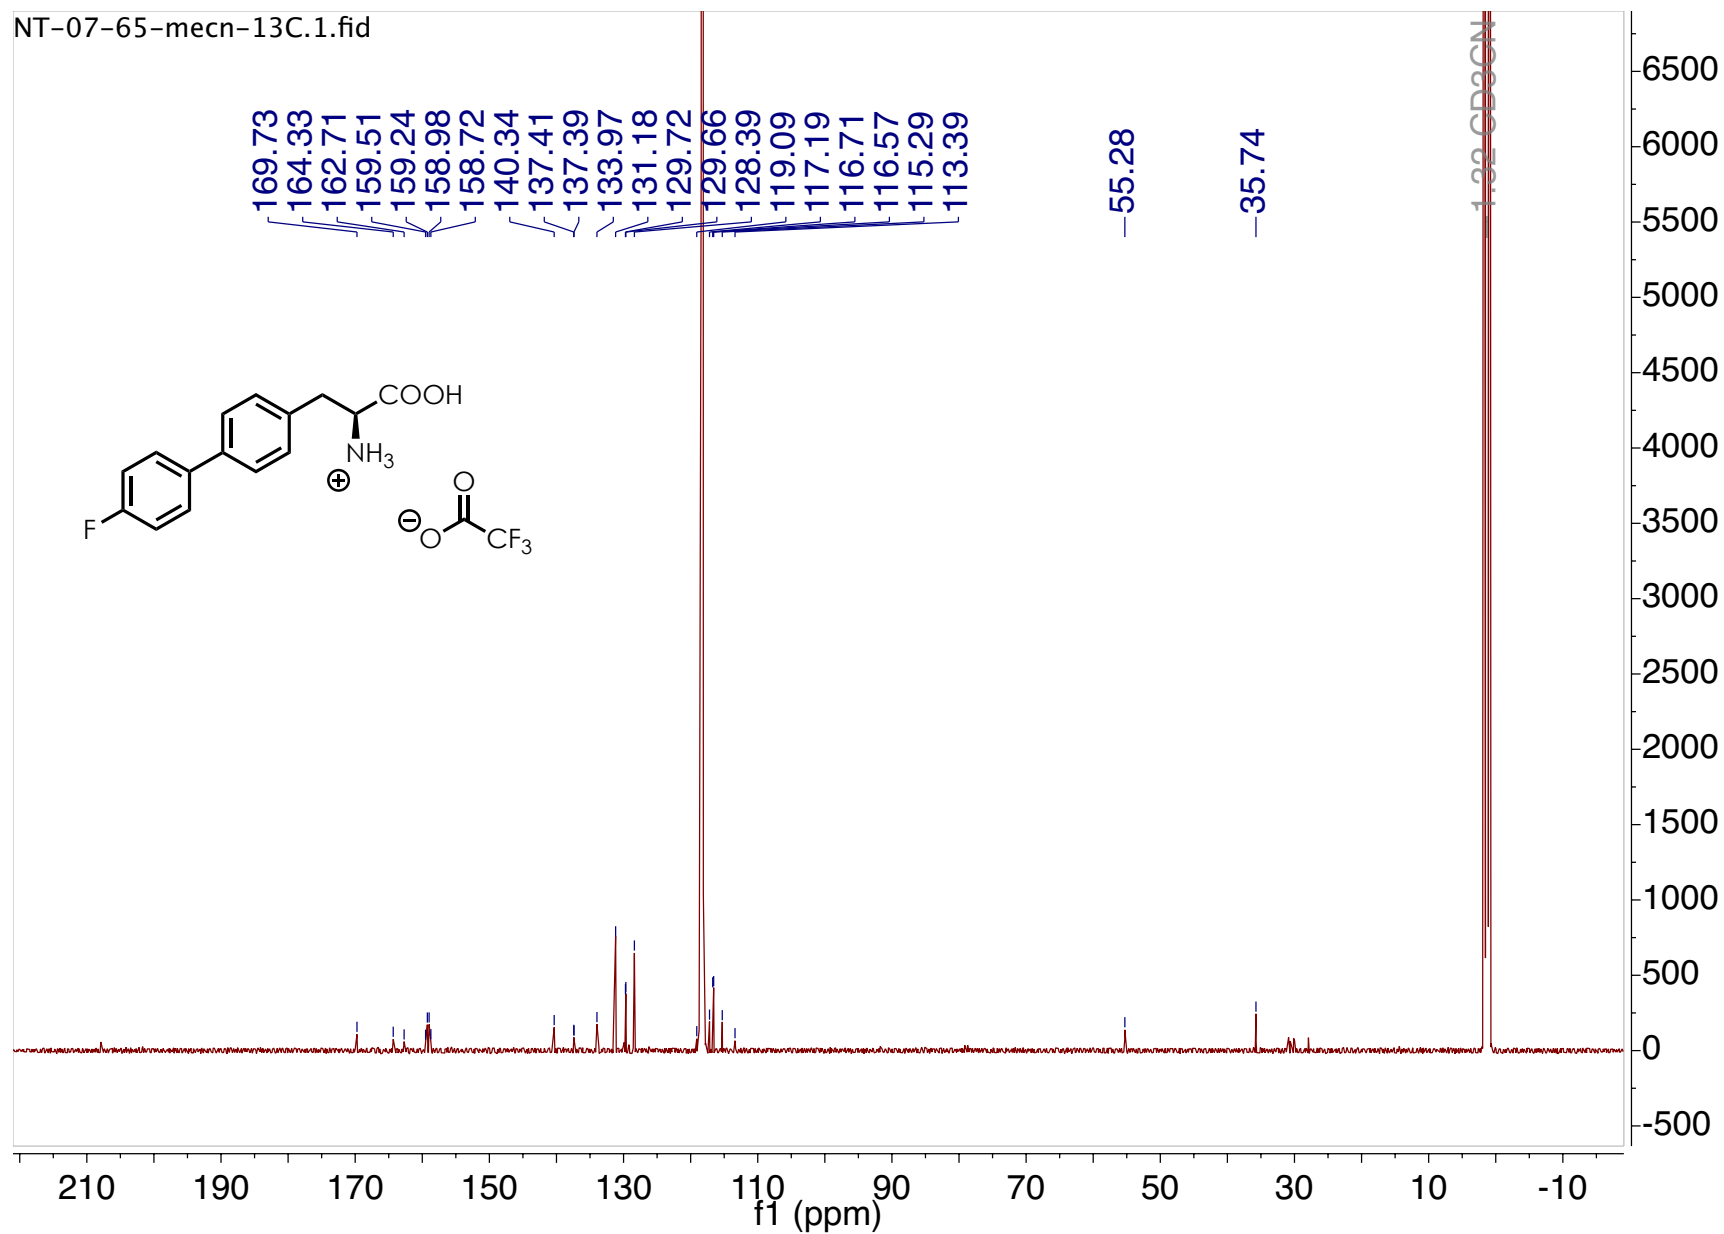

NT-07-65-mecn.1.fid

F19 CD3CN {C:\data\ntay} nmrsu 55

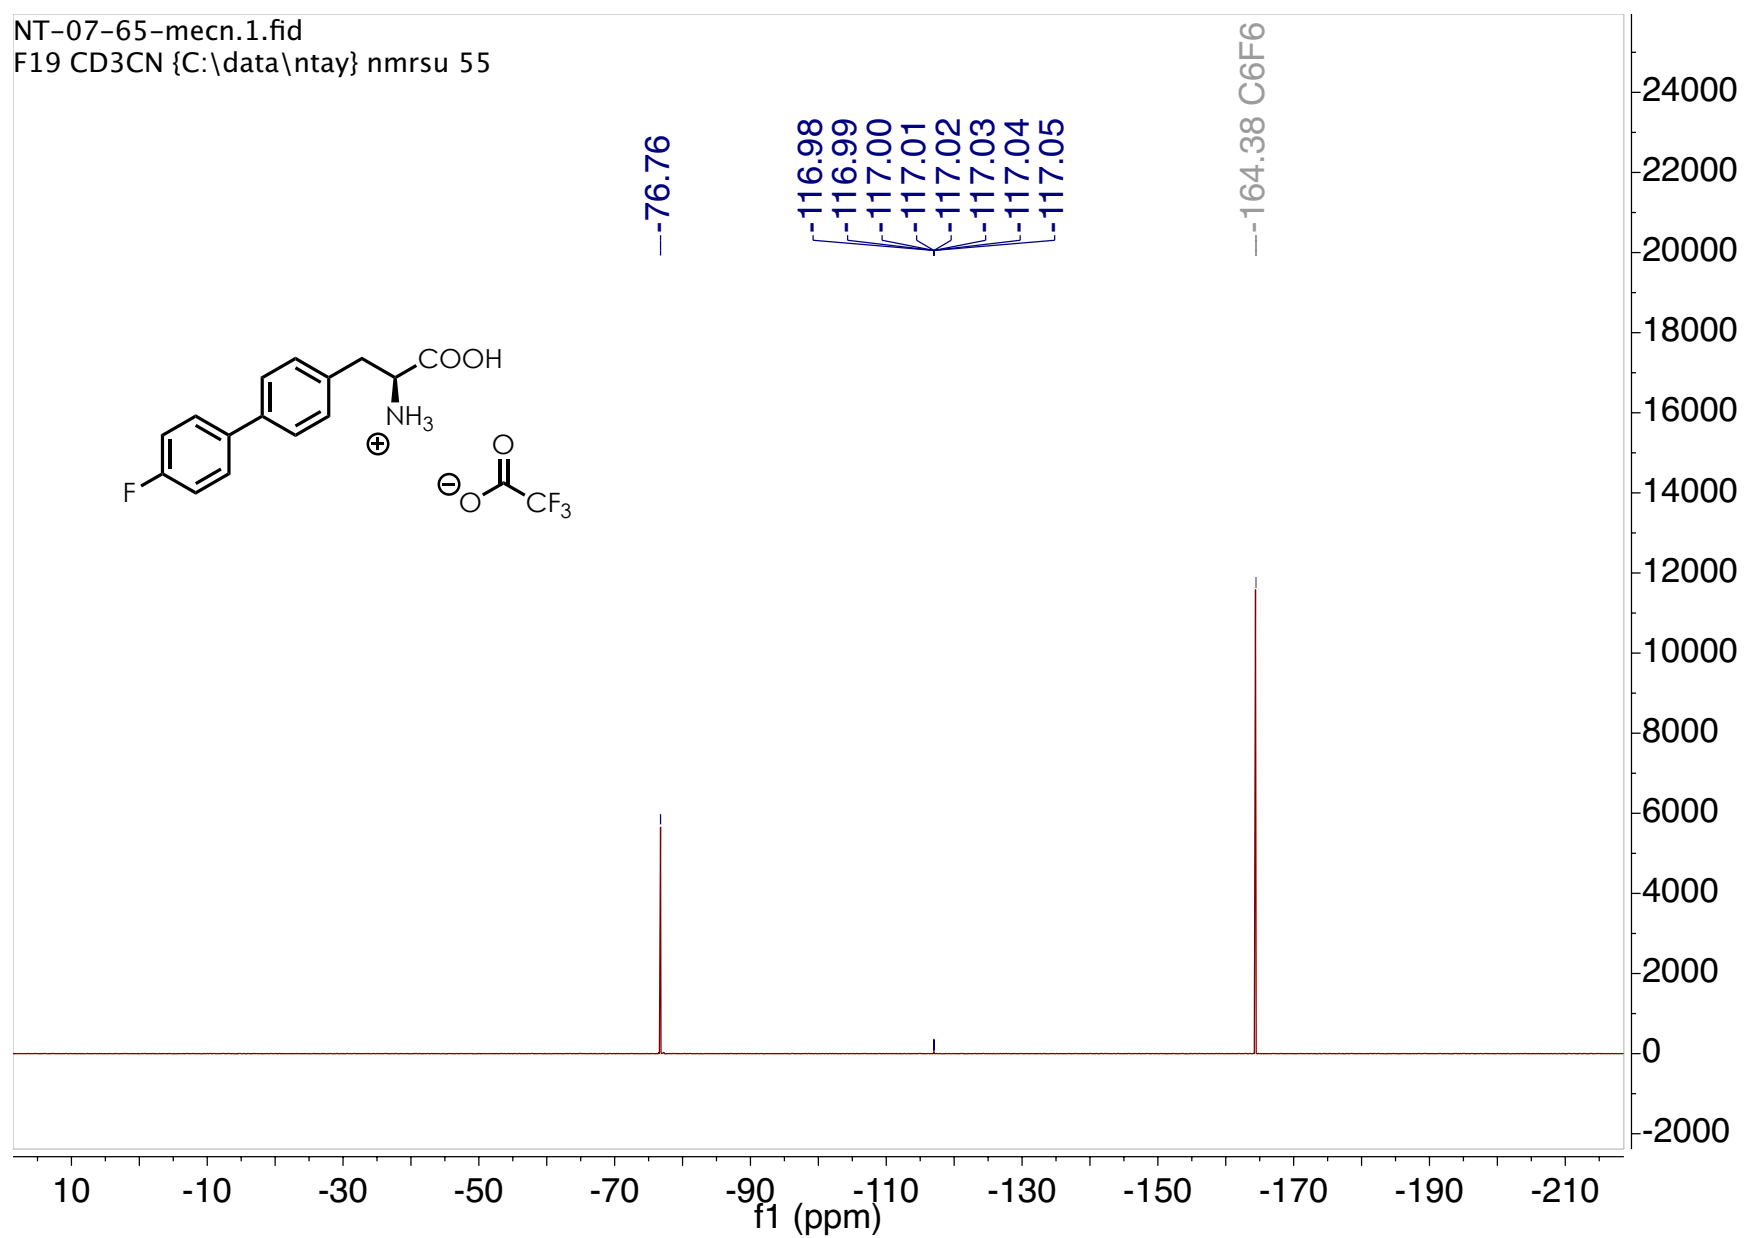

NT-07-65-meod-1H.1.fid

Nicewicz

5106082

ntay

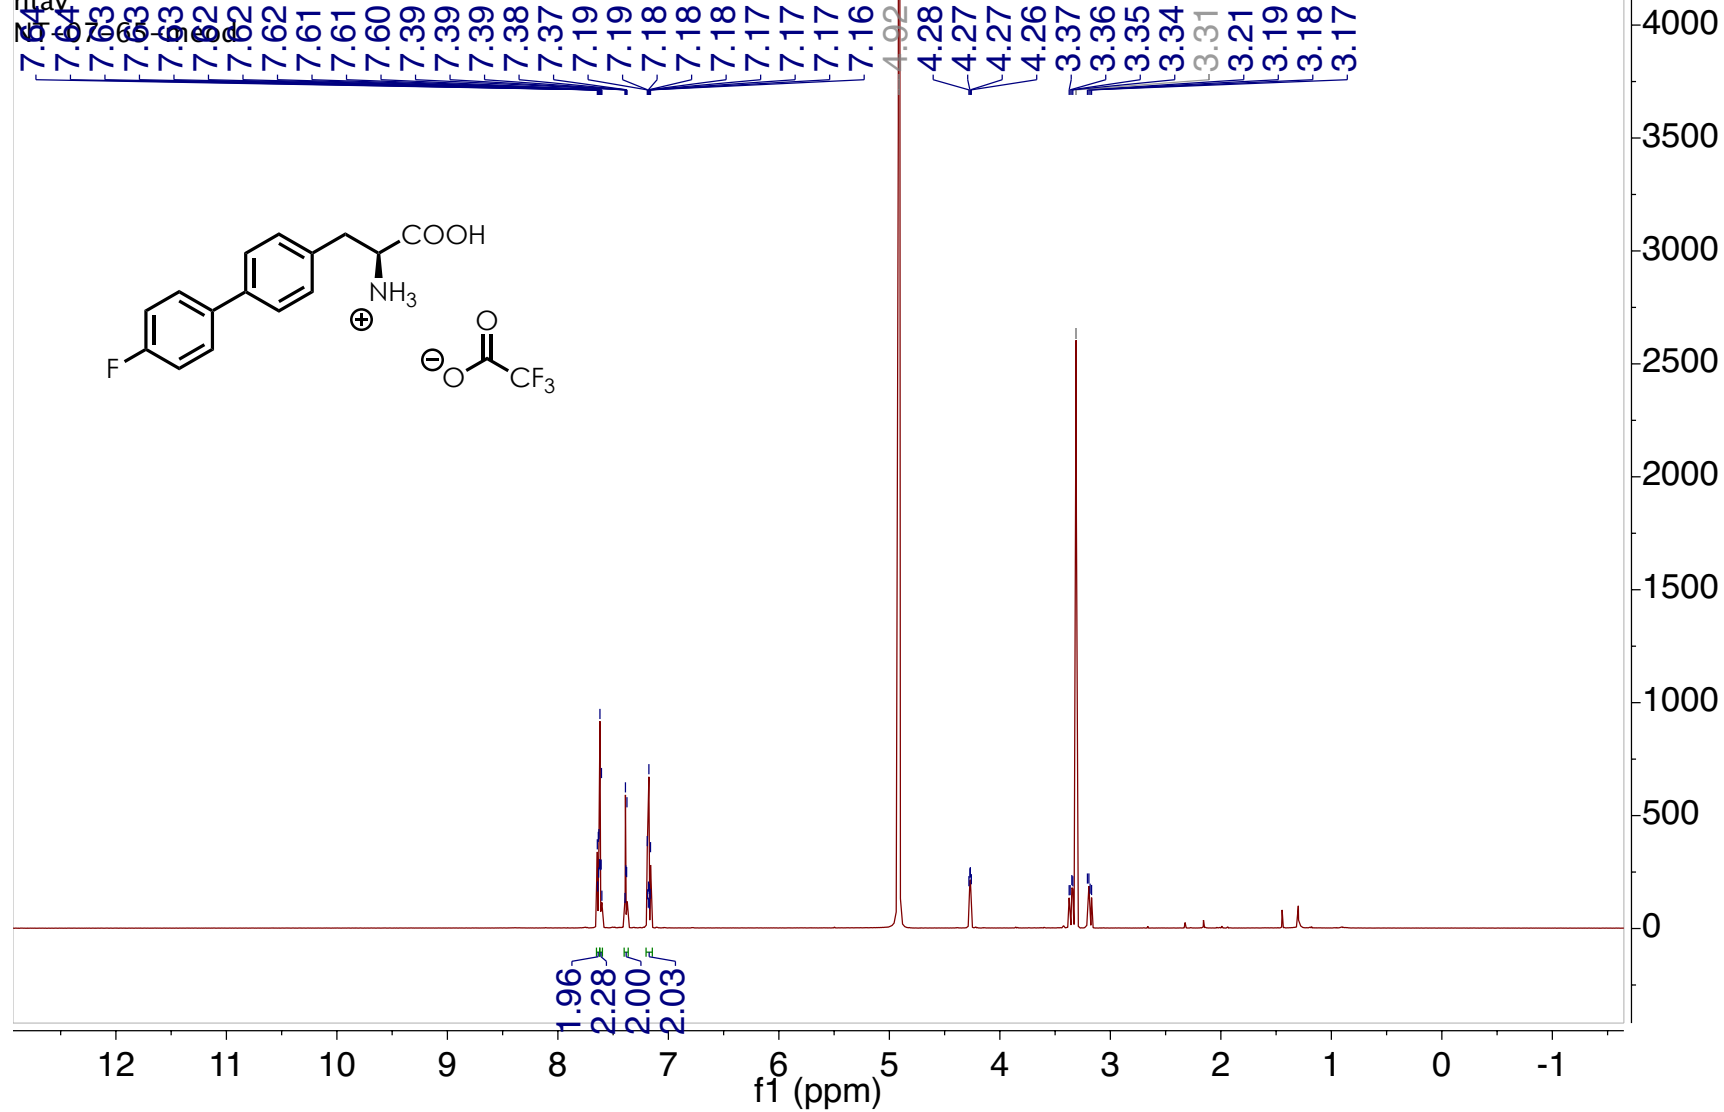

NT-07-65-meod.2.fid

Nicewicz

5106082

ntay

NT-07-65-meod

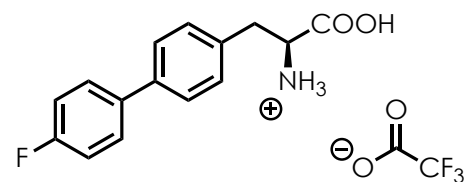

171.35  
164.81  
163.19  
141.01  
138.15  
138.13  
134.74  
131.05  
129.78  
129.73  
128.60  
116.69  
116.55

55.17

49.00 MeOD

37.01

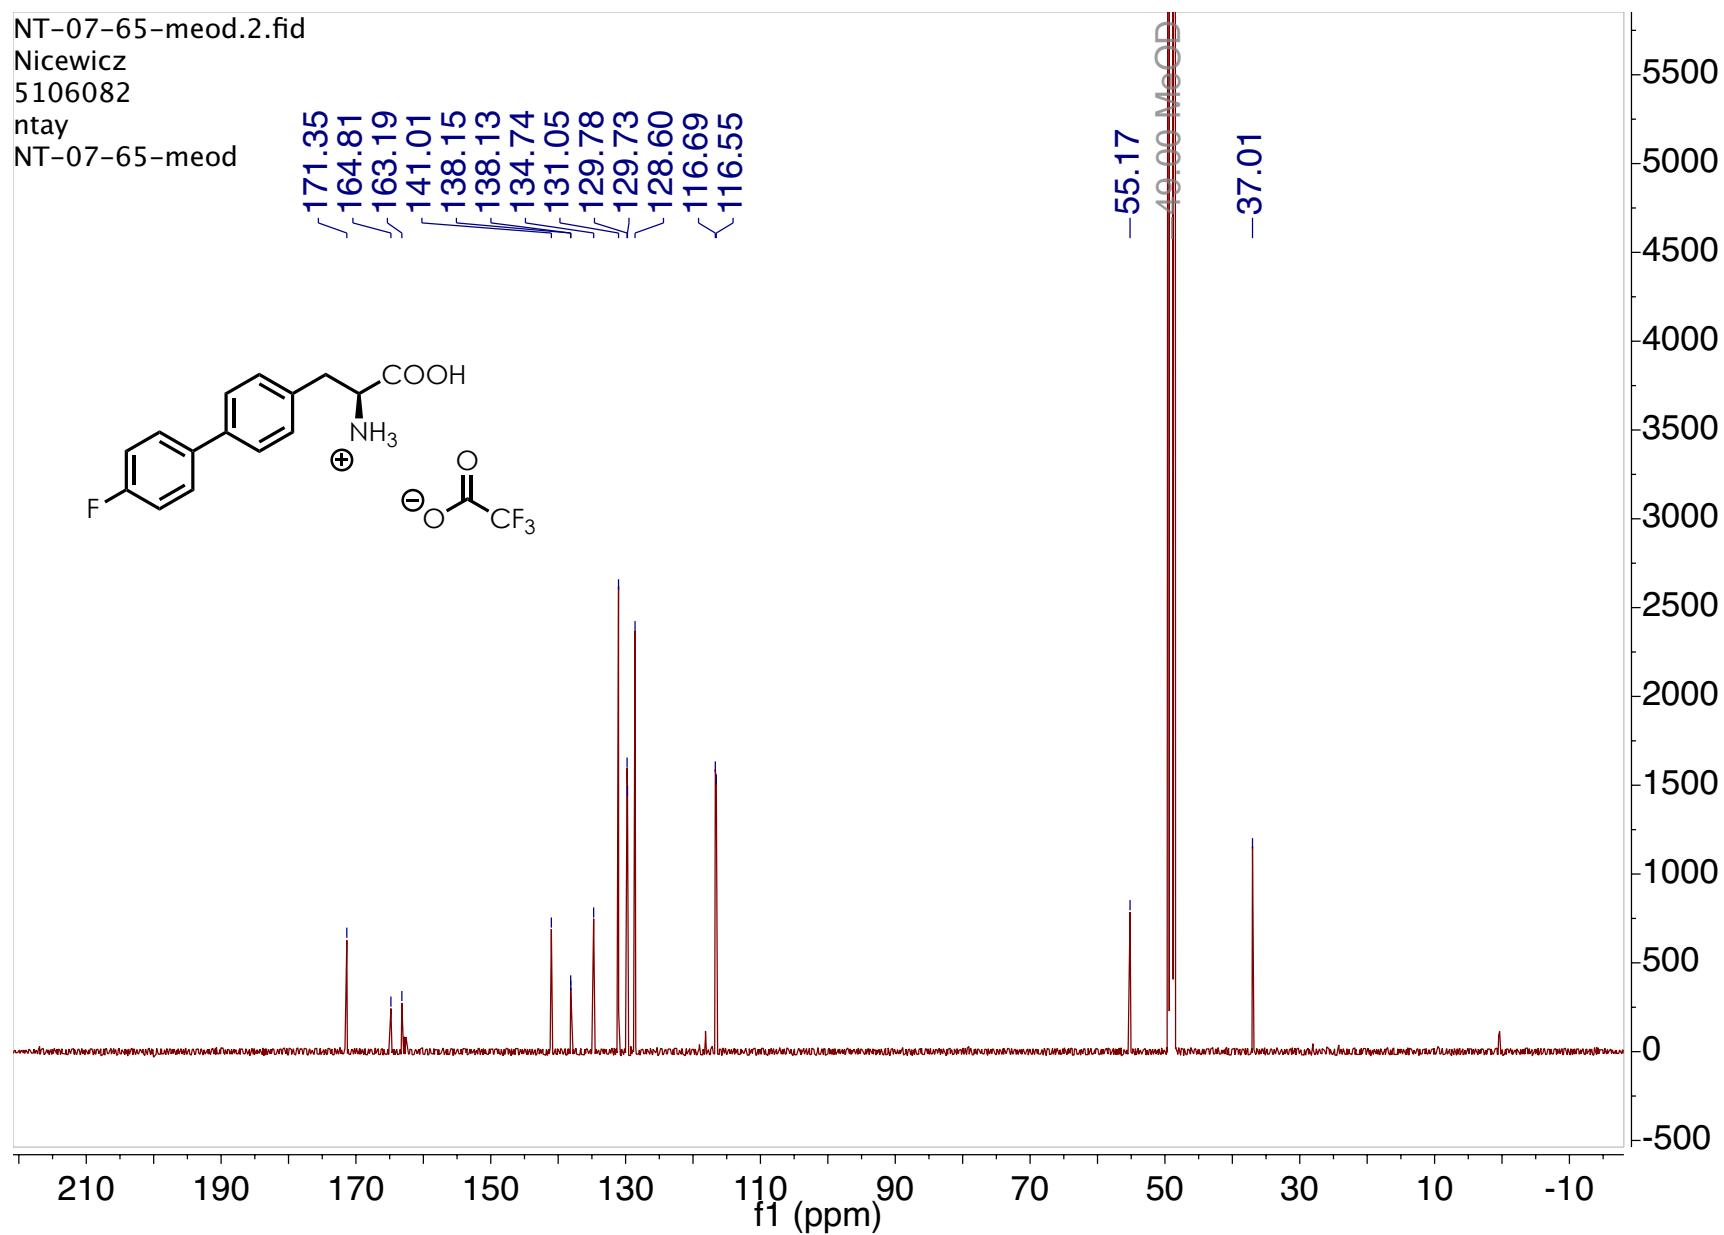

NT-07-65-meod 2.1.fid  
F19 MeOD {C:\data\ntay} nmrsu 43

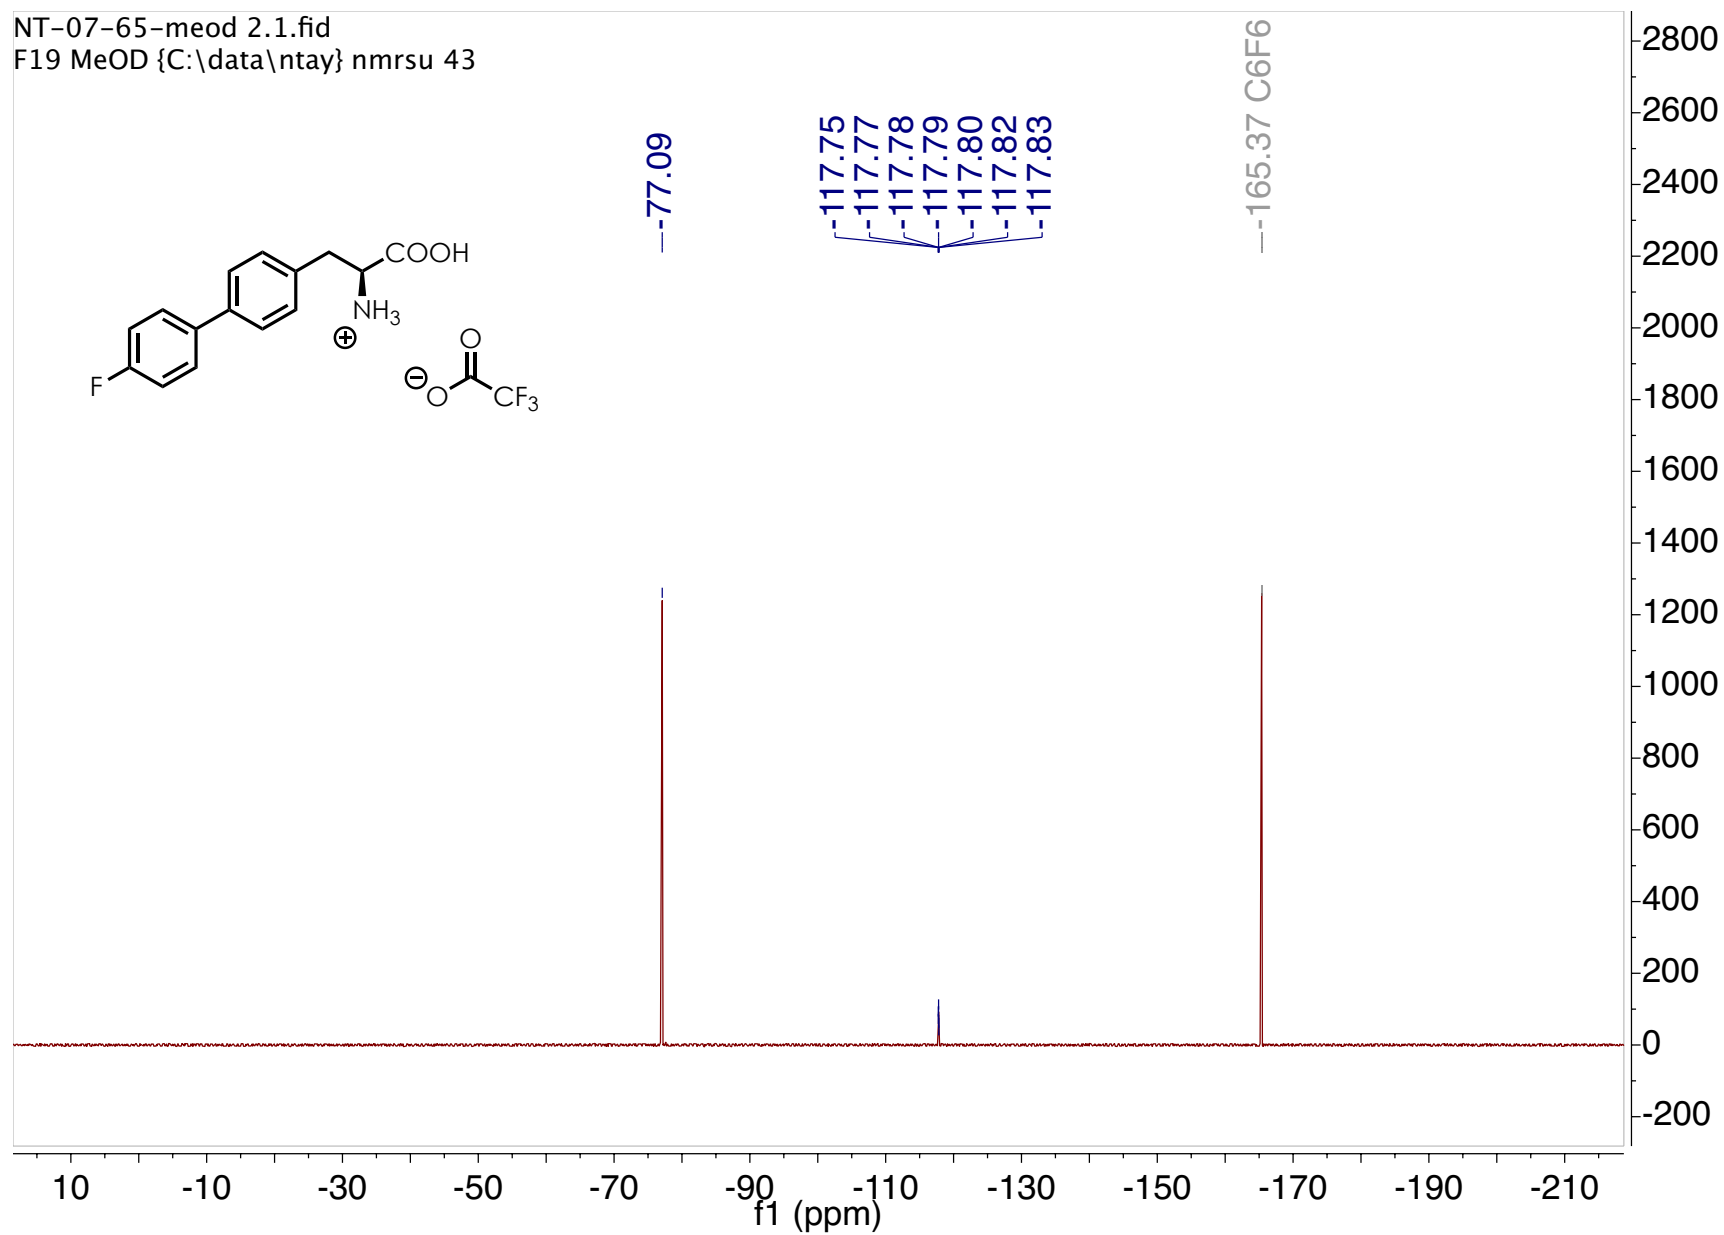

NT-07-51 1.1.fid  
Nicewicz  
5106082  
ntay  
NT-07-51

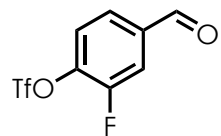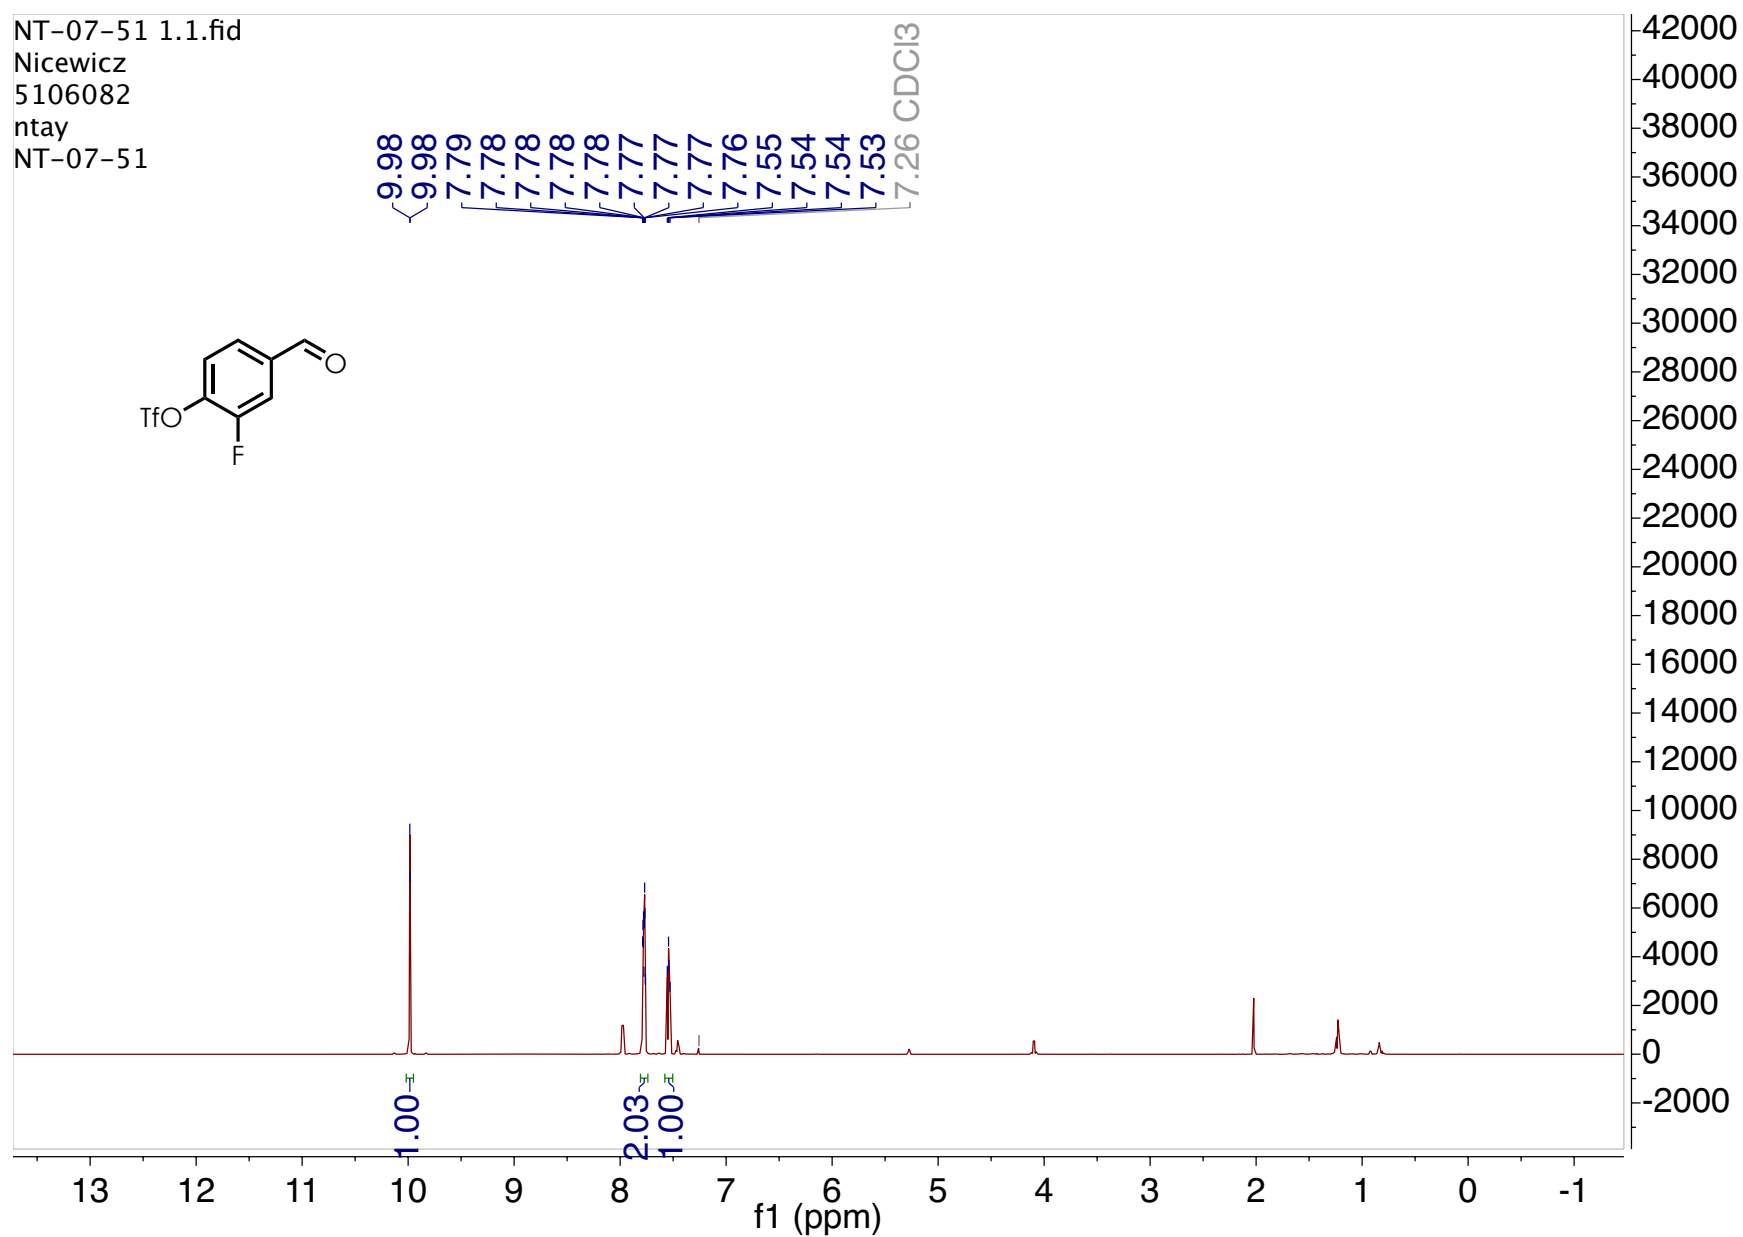

NT-07-51 2.2.fid  
Nicewicz  
5106082  
ntay  
NT-07-51

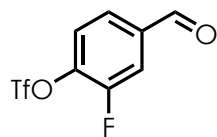

189.29  
189.28

155.13  
153.43  
140.99  
140.90  
137.31  
137.28  
126.93  
126.90  
124.62  
121.91  
119.79  
117.73  
117.66  
117.61  
115.54

-77.16 CDCl<sub>3</sub>

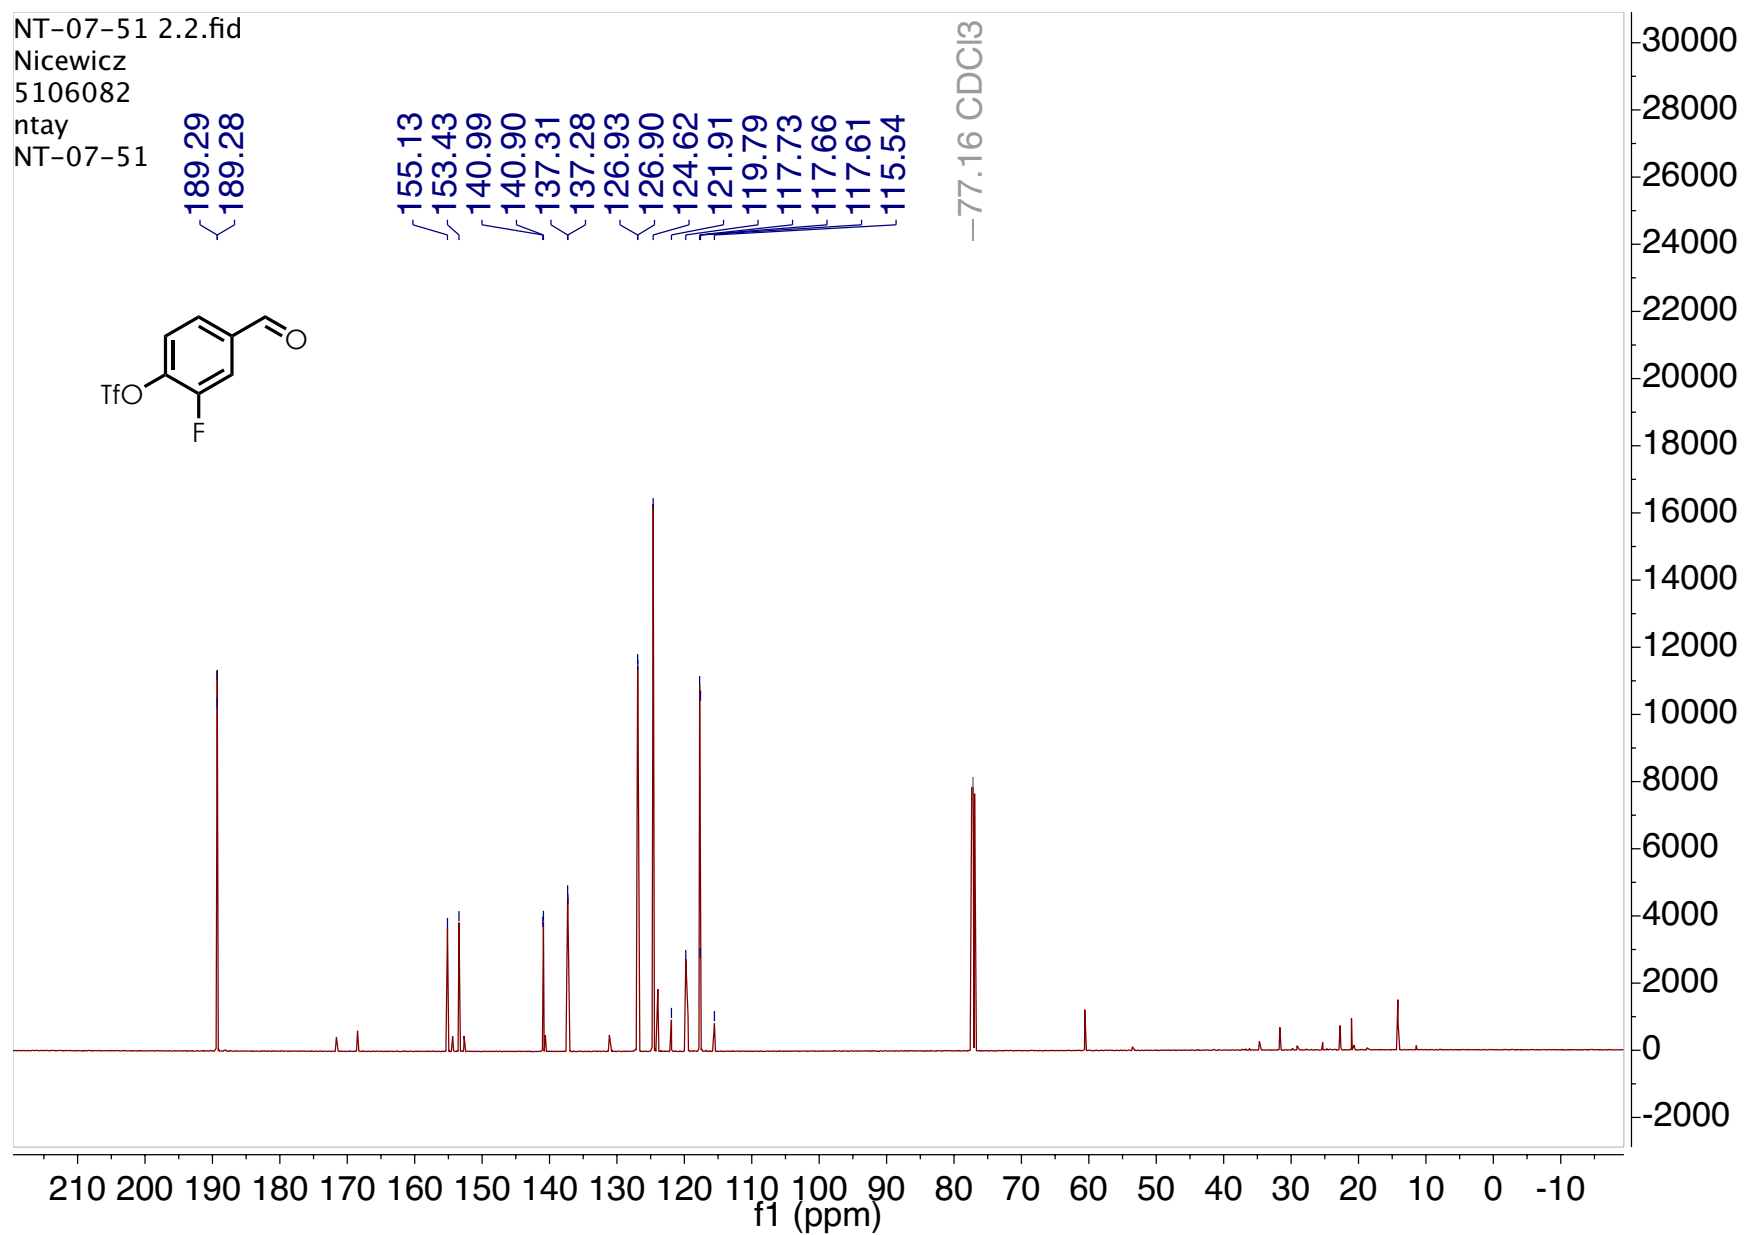

NT-07-51-19F.1.fid

F19 CDCl3 {C:\data\ntay} nmrsu 58

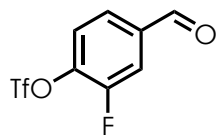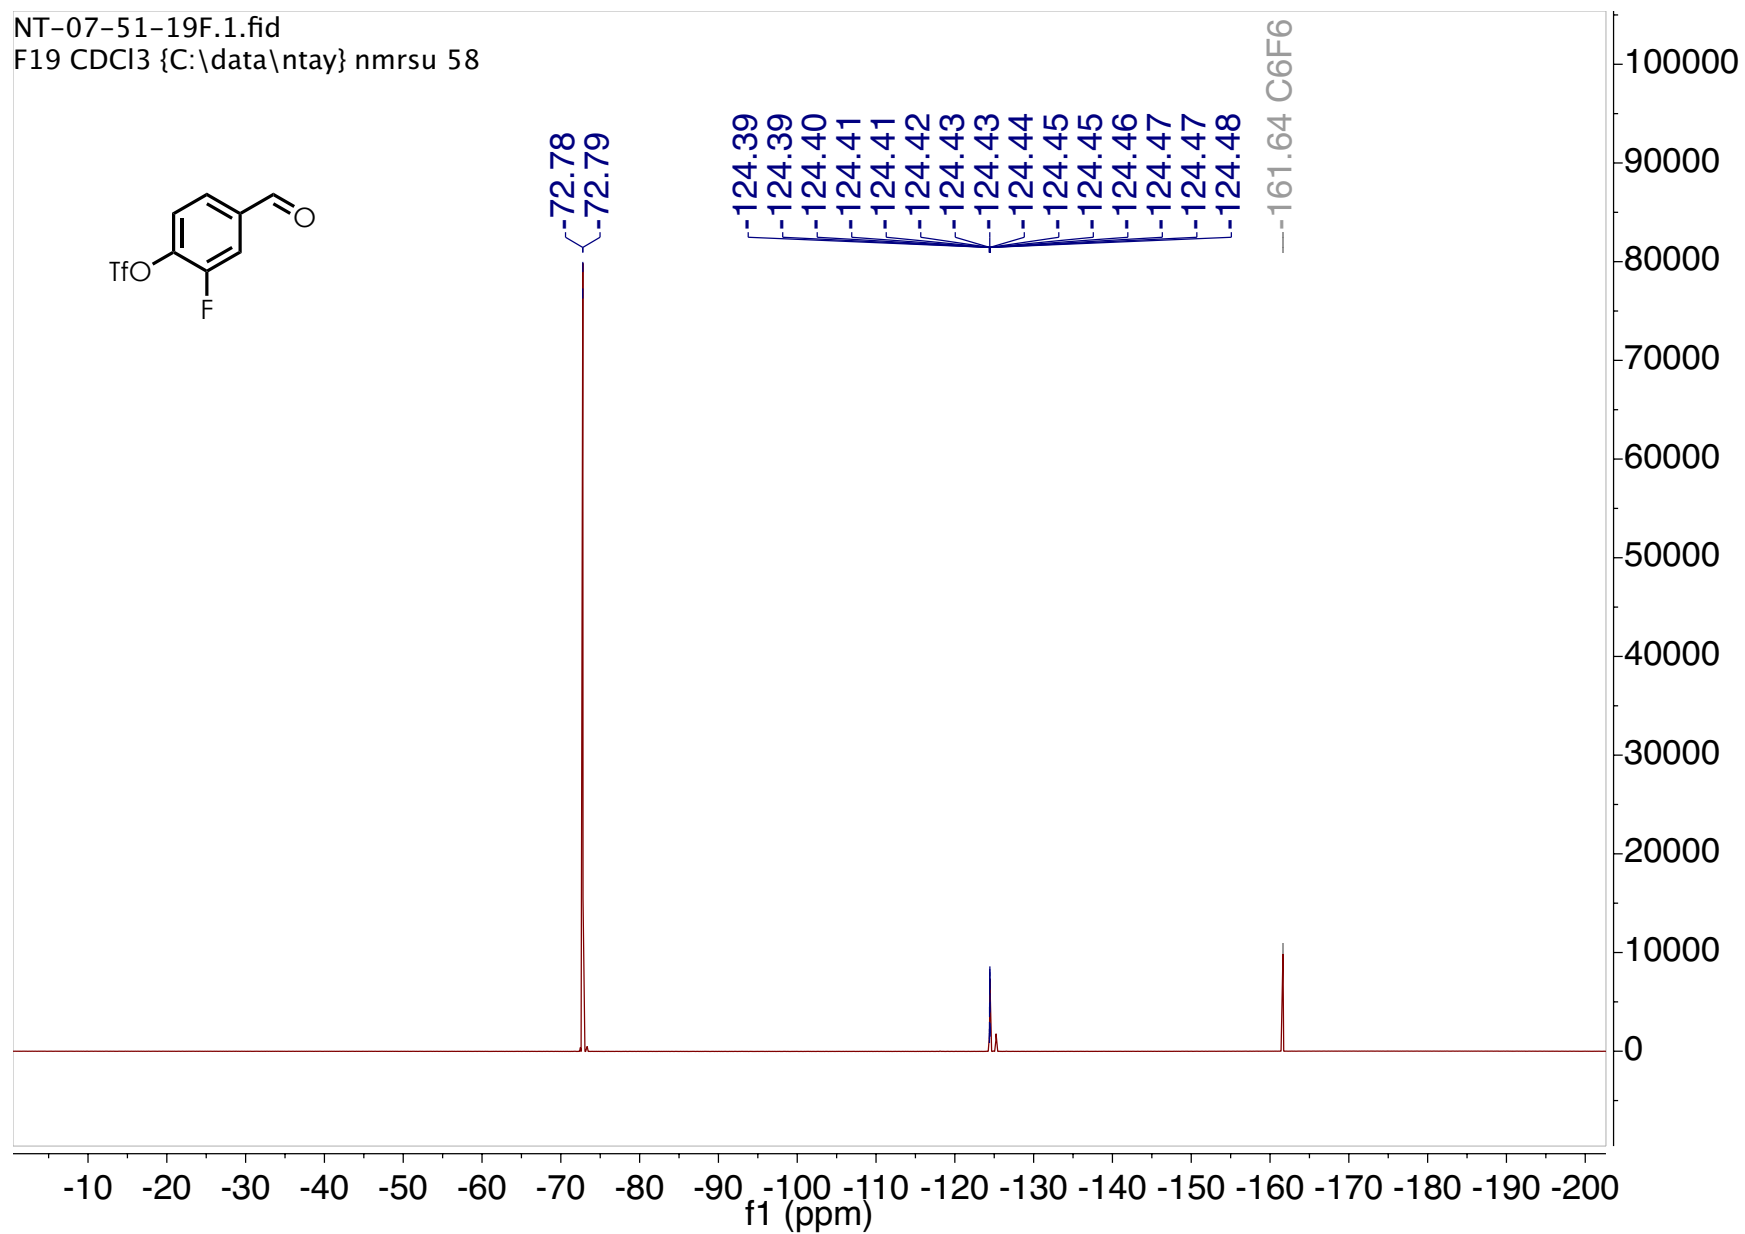

NT-07-53 1.1.fid  
Nicewicz  
5106082  
ntay  
NT-07-53

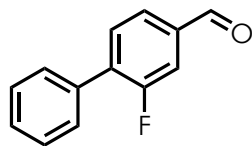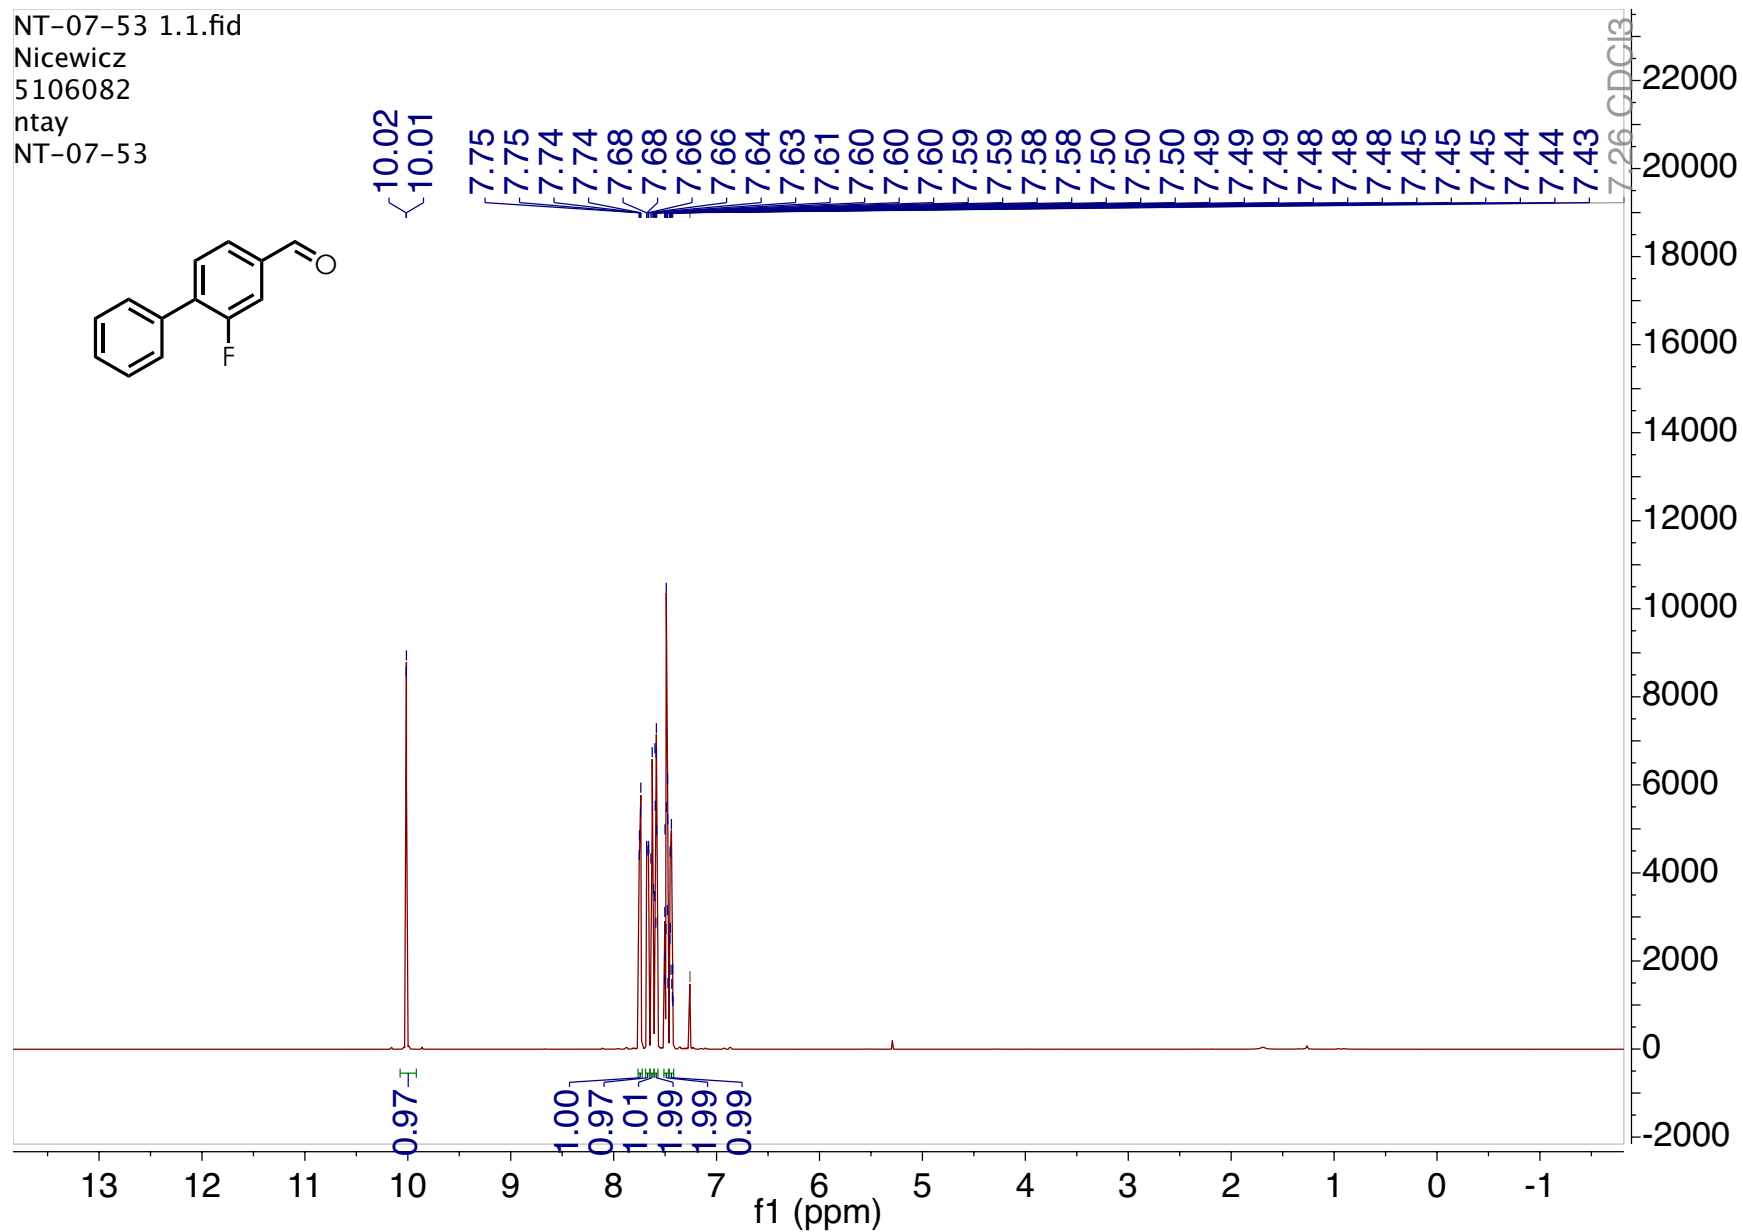

NT-07-53 2.2.fid

Nicewicz

5106082

ntay

NT-07-53

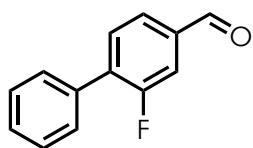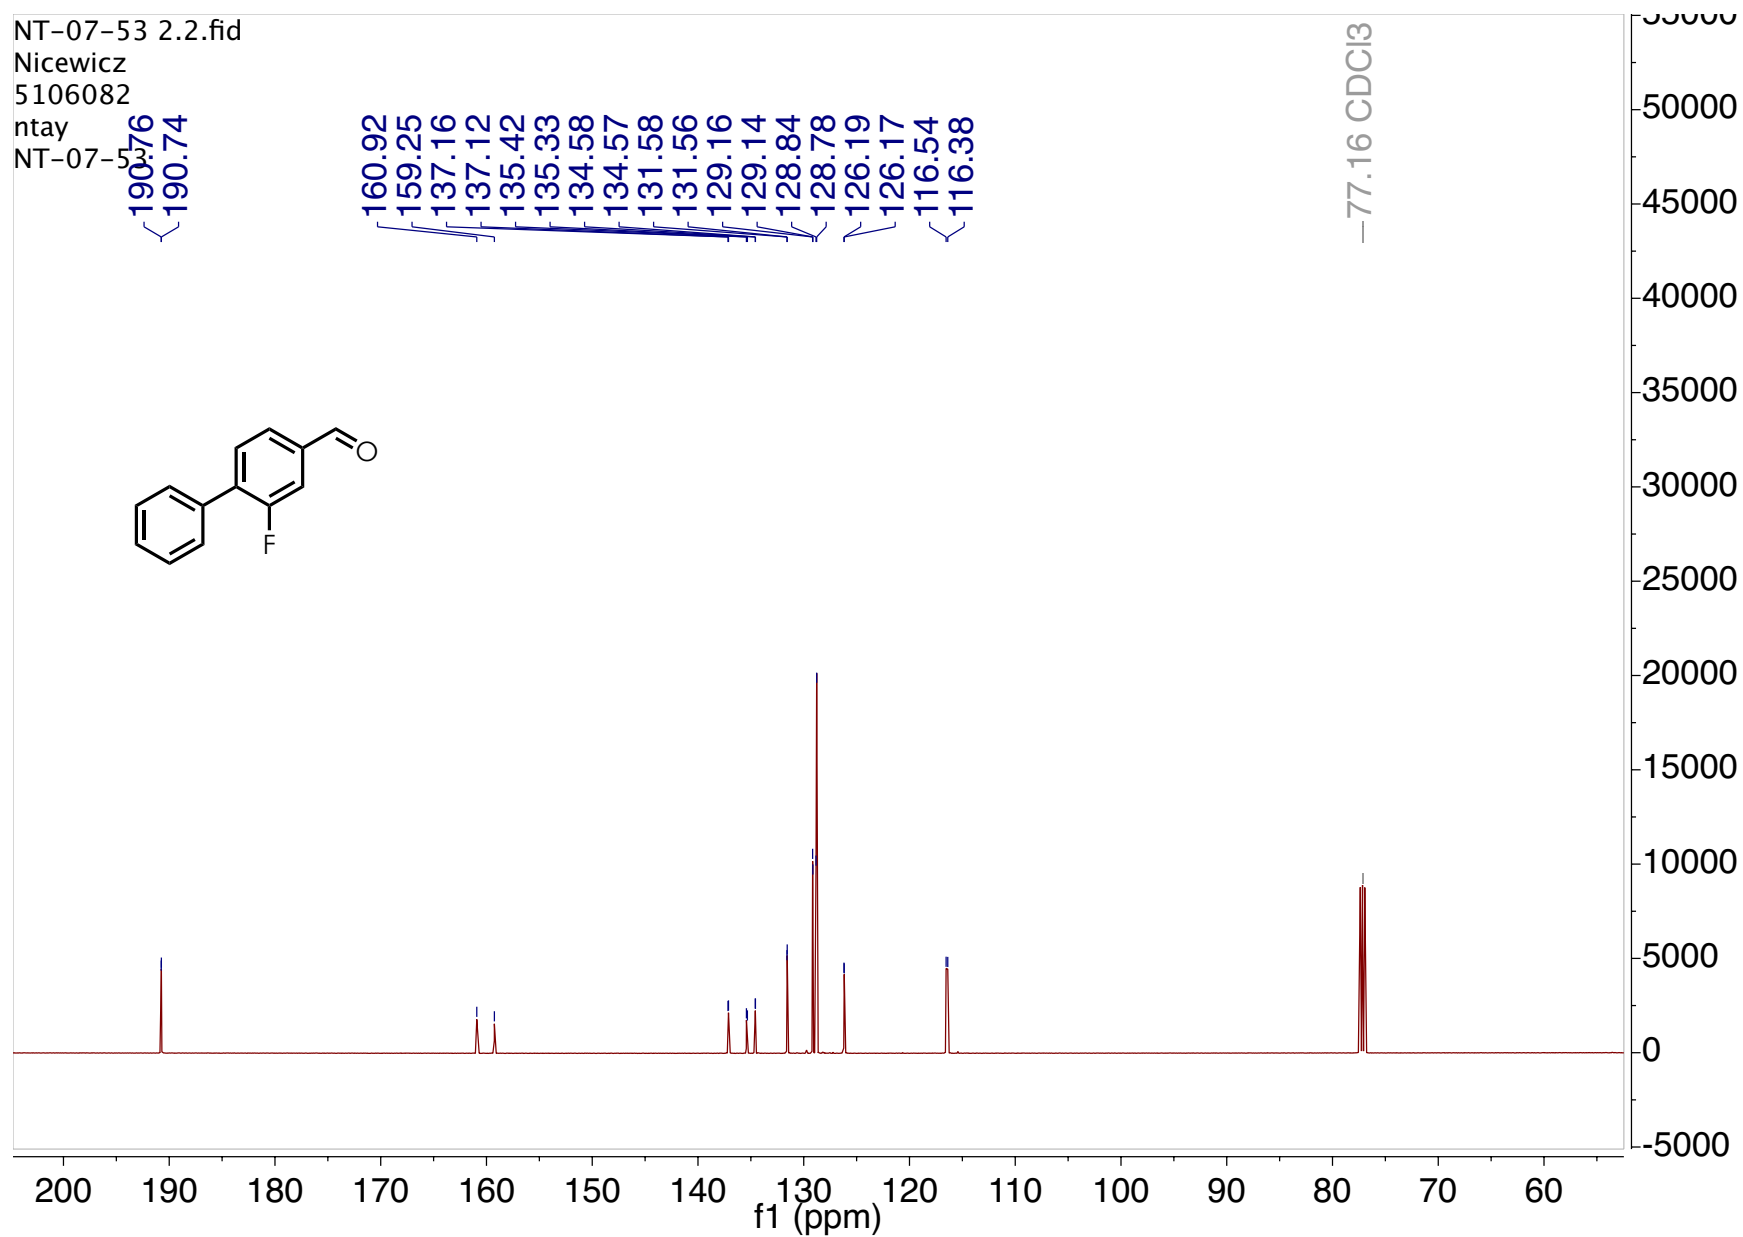

NT-07-53-19F.2.fid

F19 CDCl<sub>3</sub> {C:\data\ntay} nmrsu 59

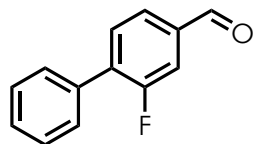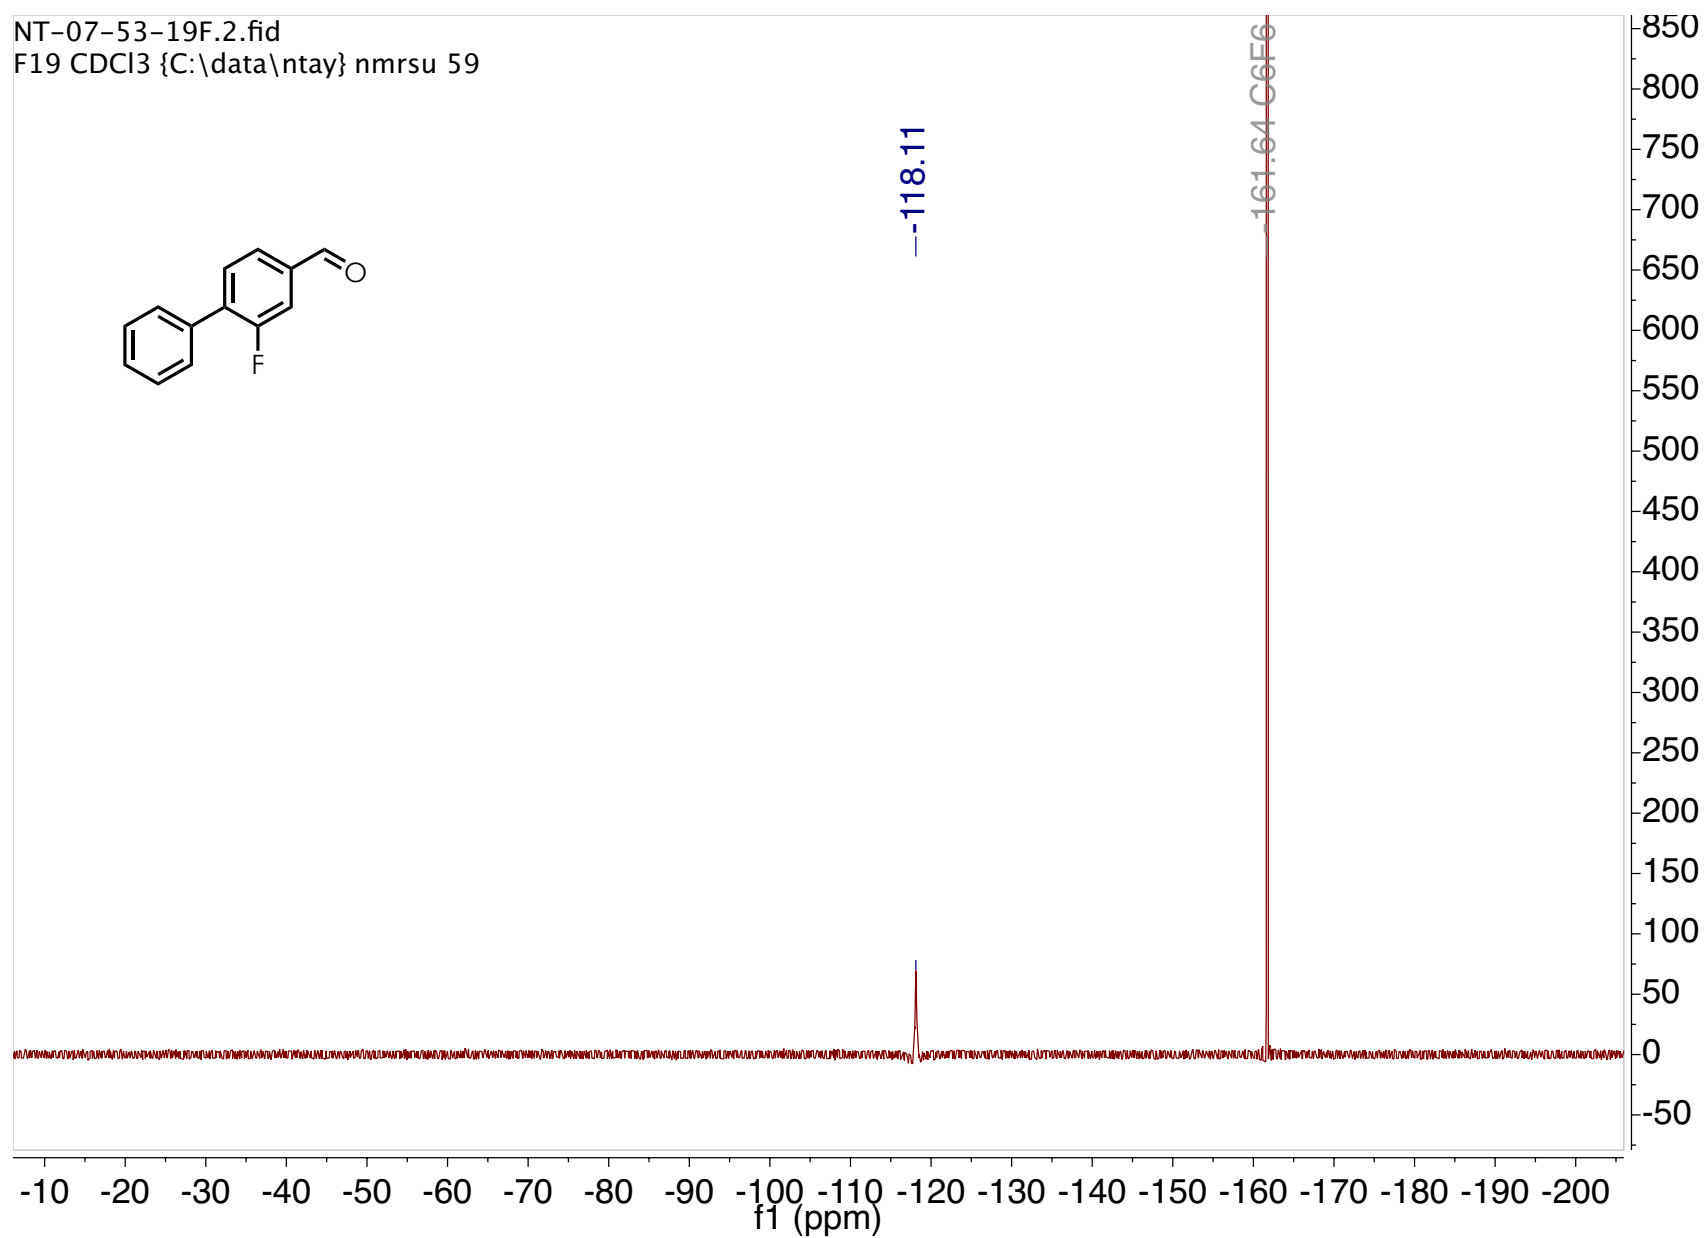

NT-07-56 1.1.fid

Nicewicz

5106082

ntay

NT-07-56

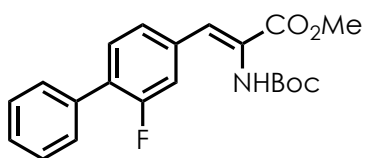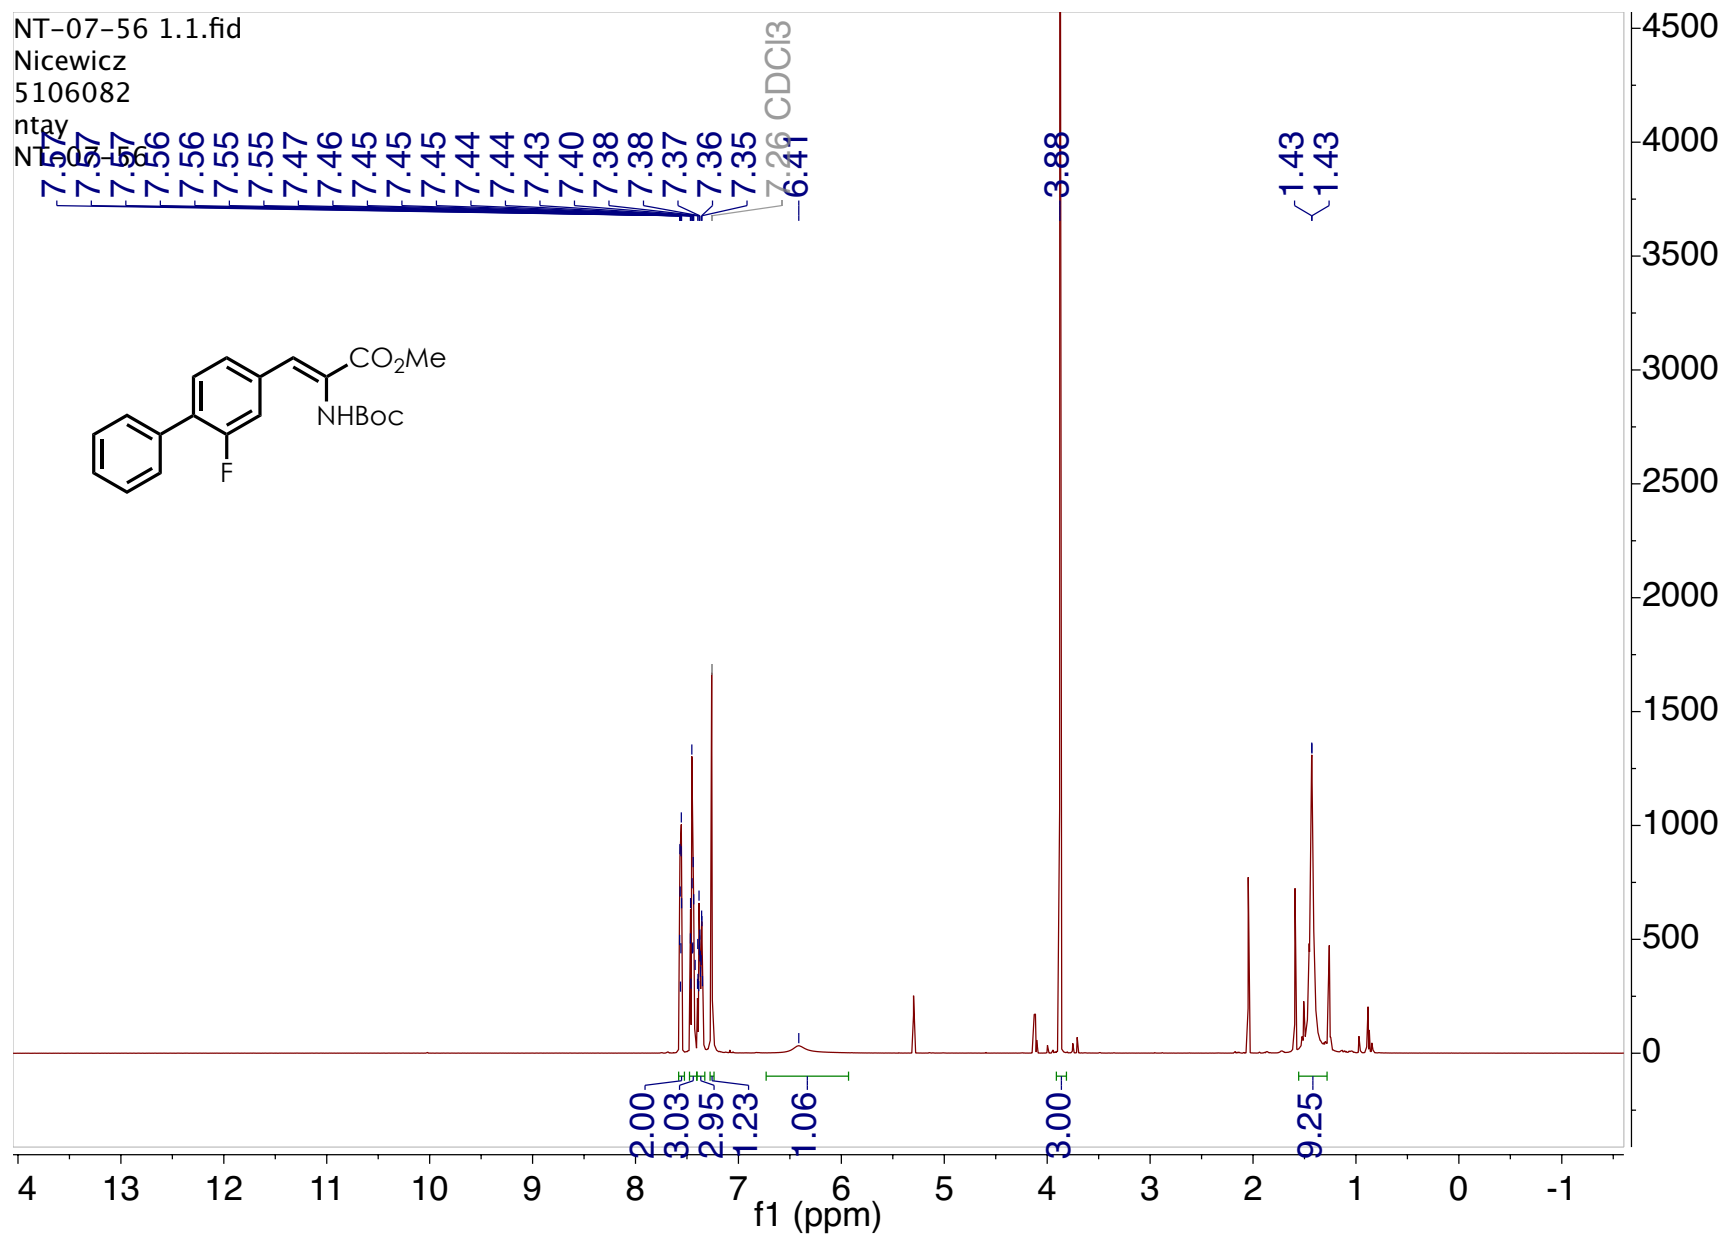

NT-07-56 2.2.fid

Nicewicz

5106082

ntay

NT-07-56

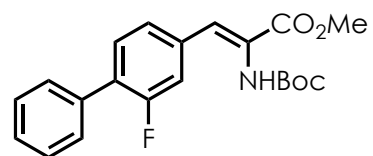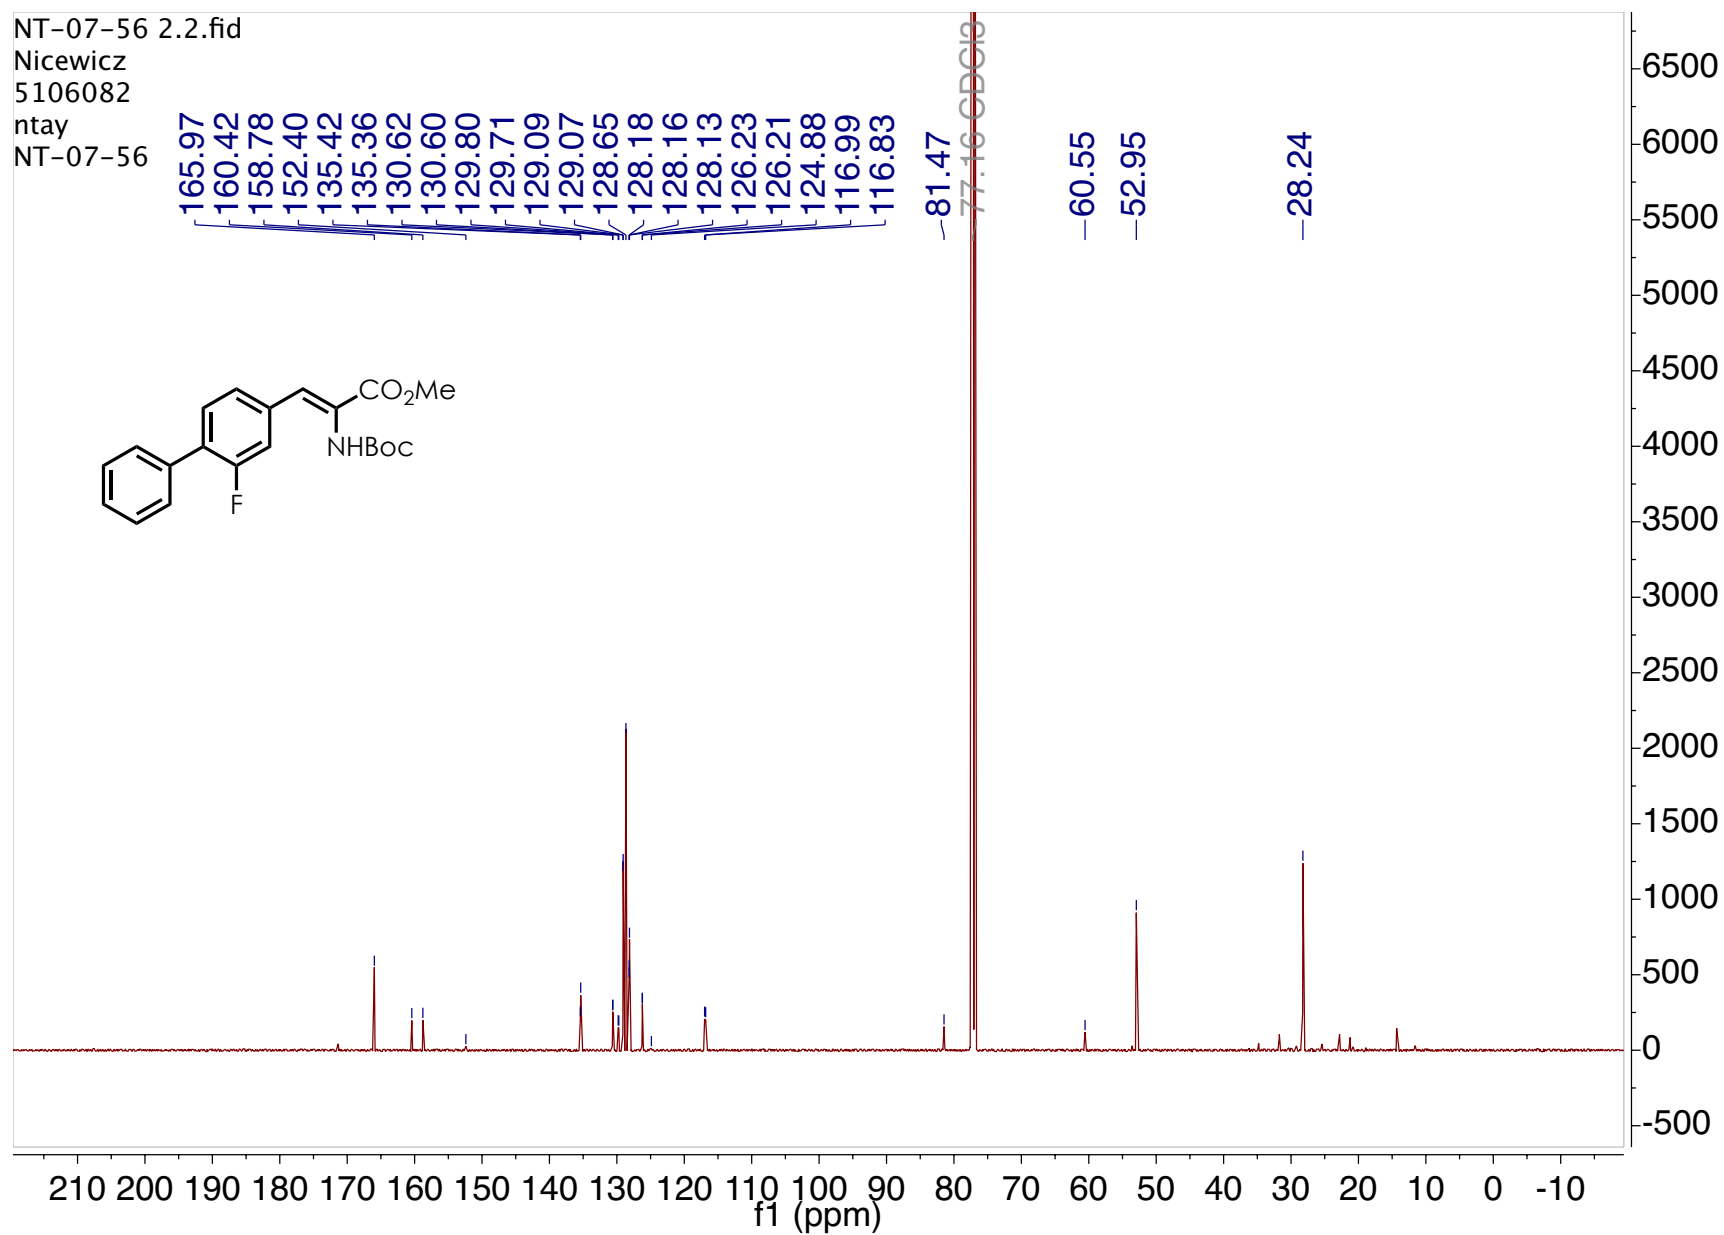

NT-07-56-19F.1.fid

F19 CDCl<sub>3</sub> {C:\data\ntay} nmrsu 60

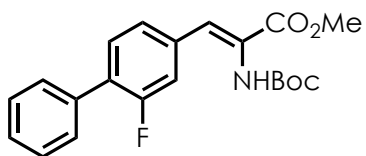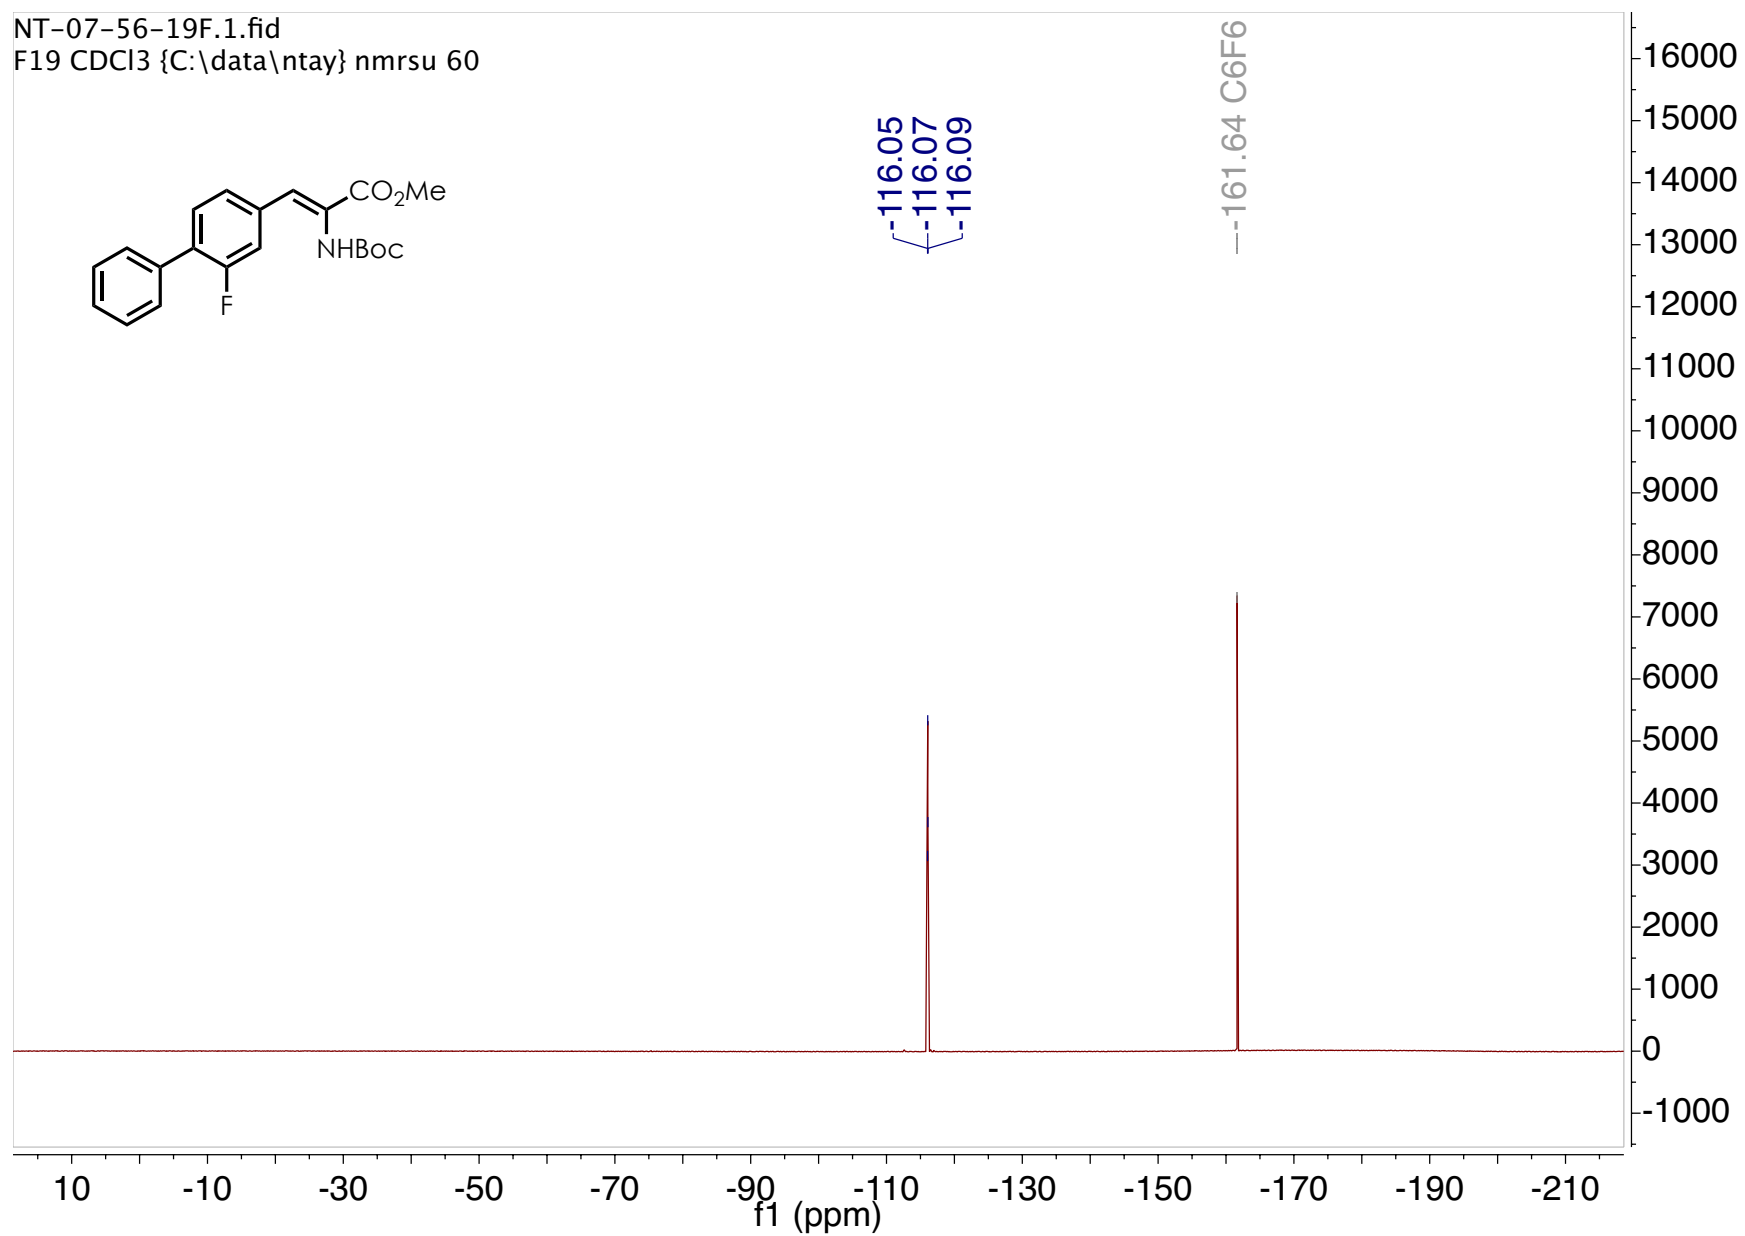

NT-07-59 1.1.fid

Nicewicz

5106082

ntay

NT

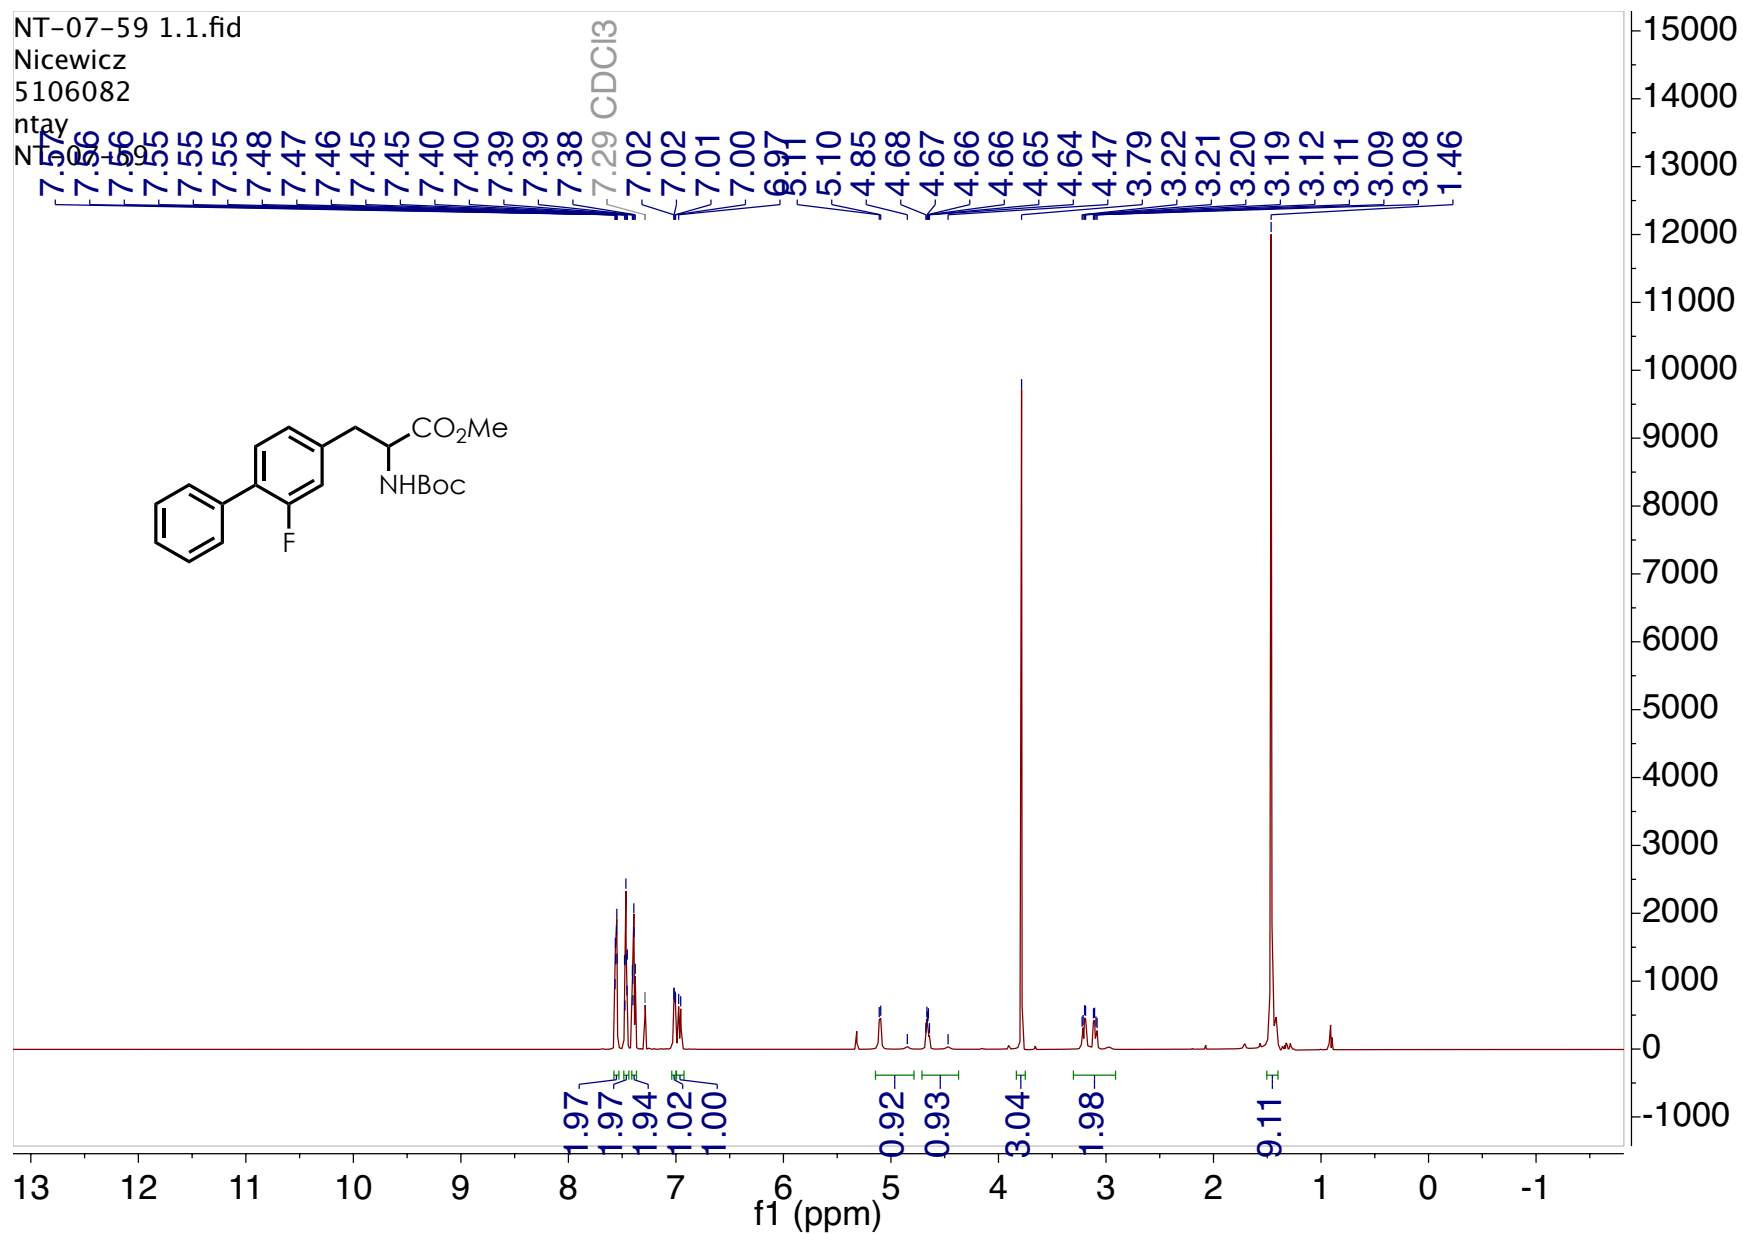

NT-07-59 2.2.fid

Nicewicz

5106082

ntay

NT-07-59

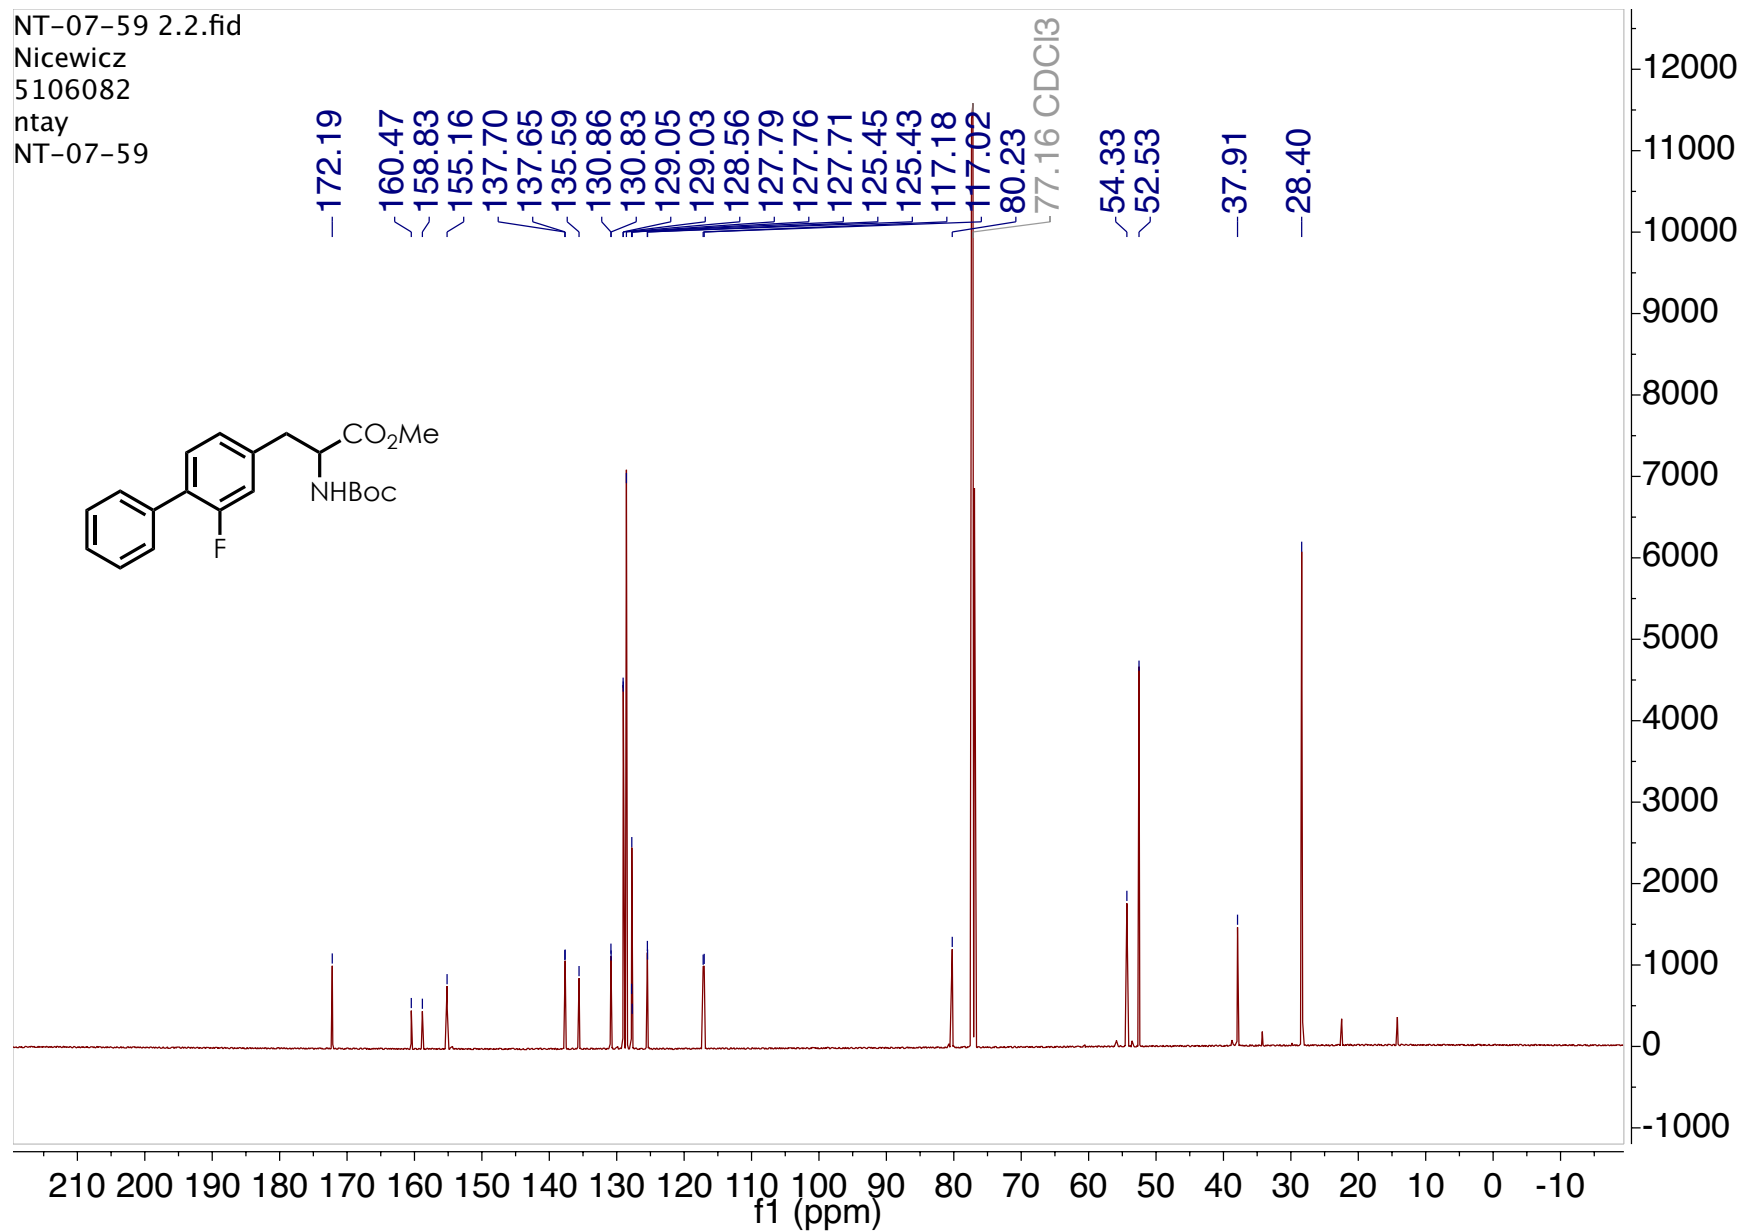

NT-07-59-19F.1.fid  
F19 CDCl3 {C:\data} nmrsu 2

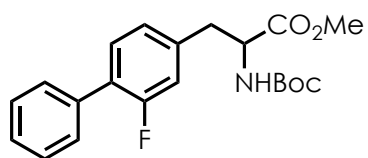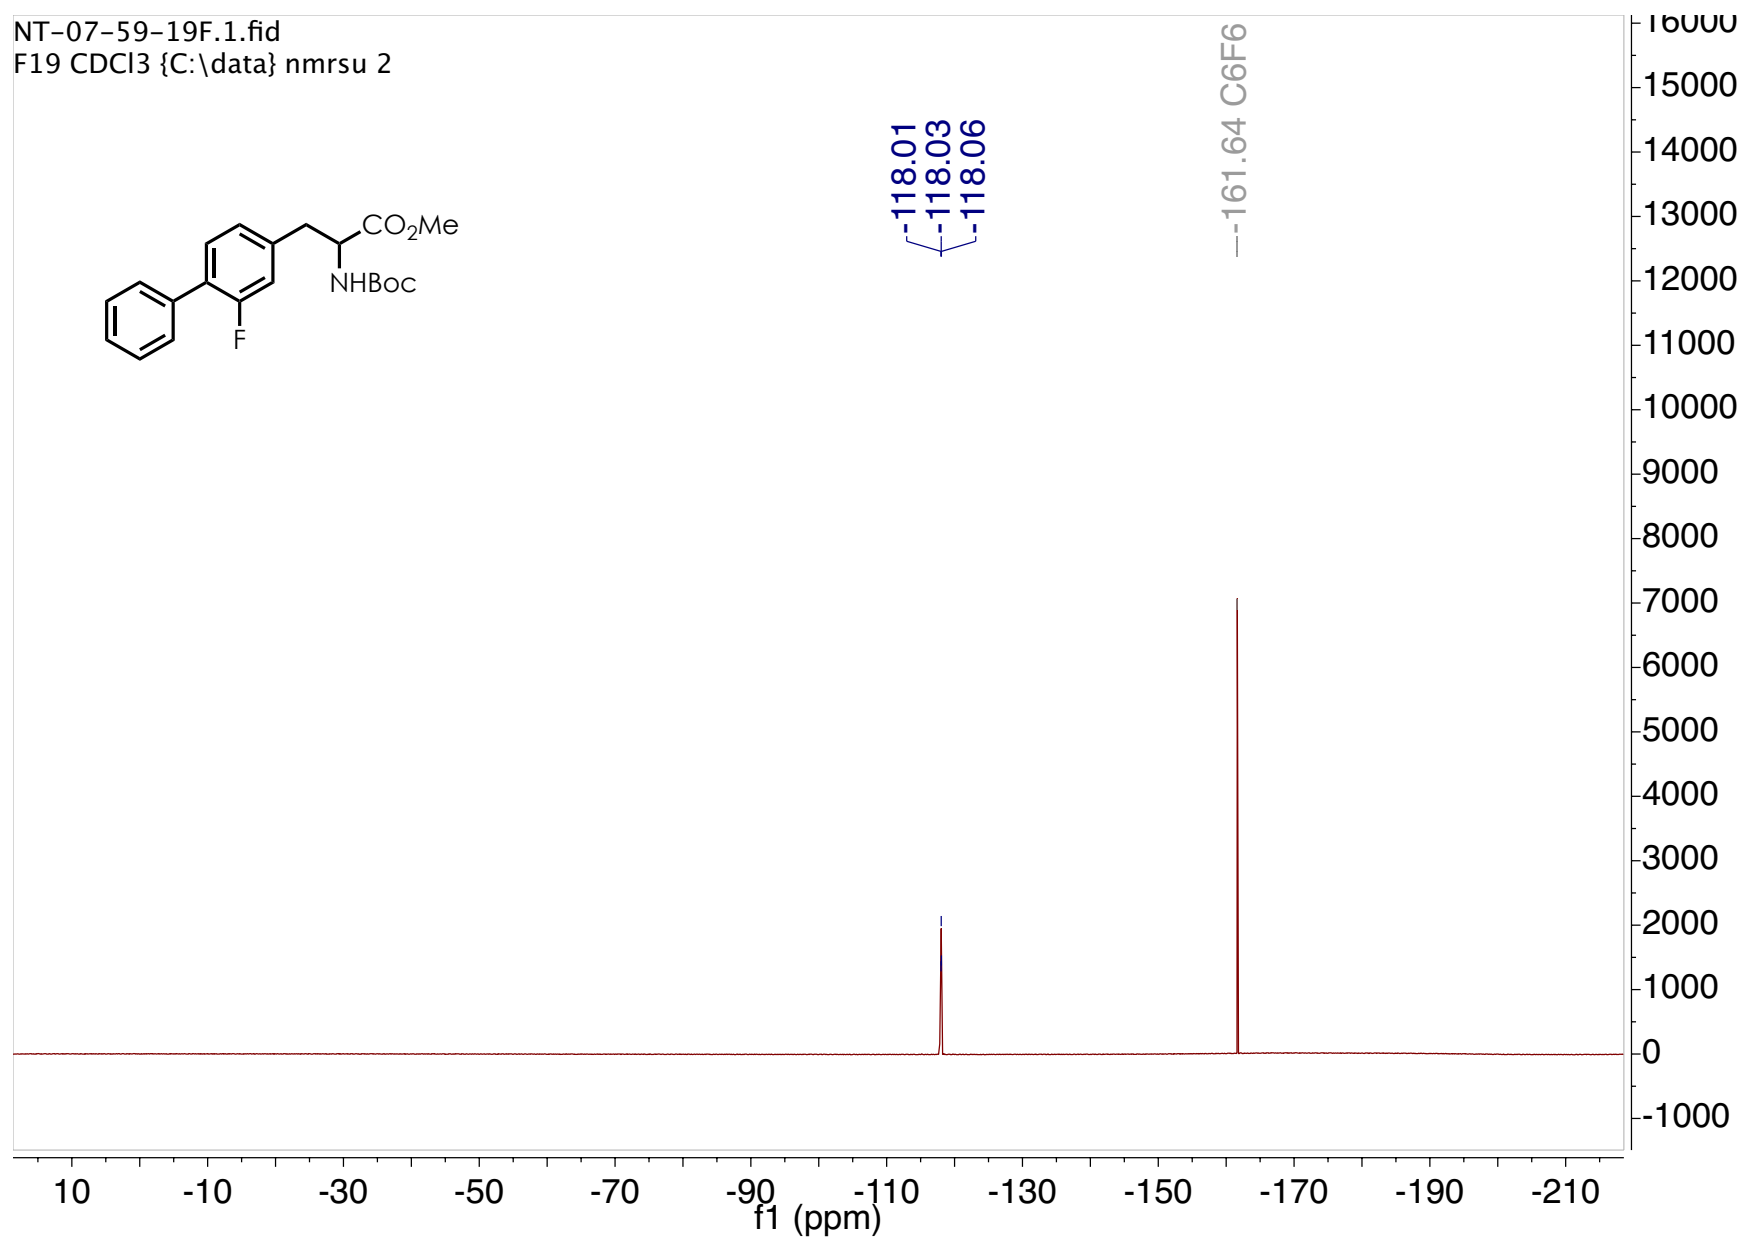

NT-WC-2-92 1.1.fid

Nicewicz

5106082

ntay

NT-WC-2-92

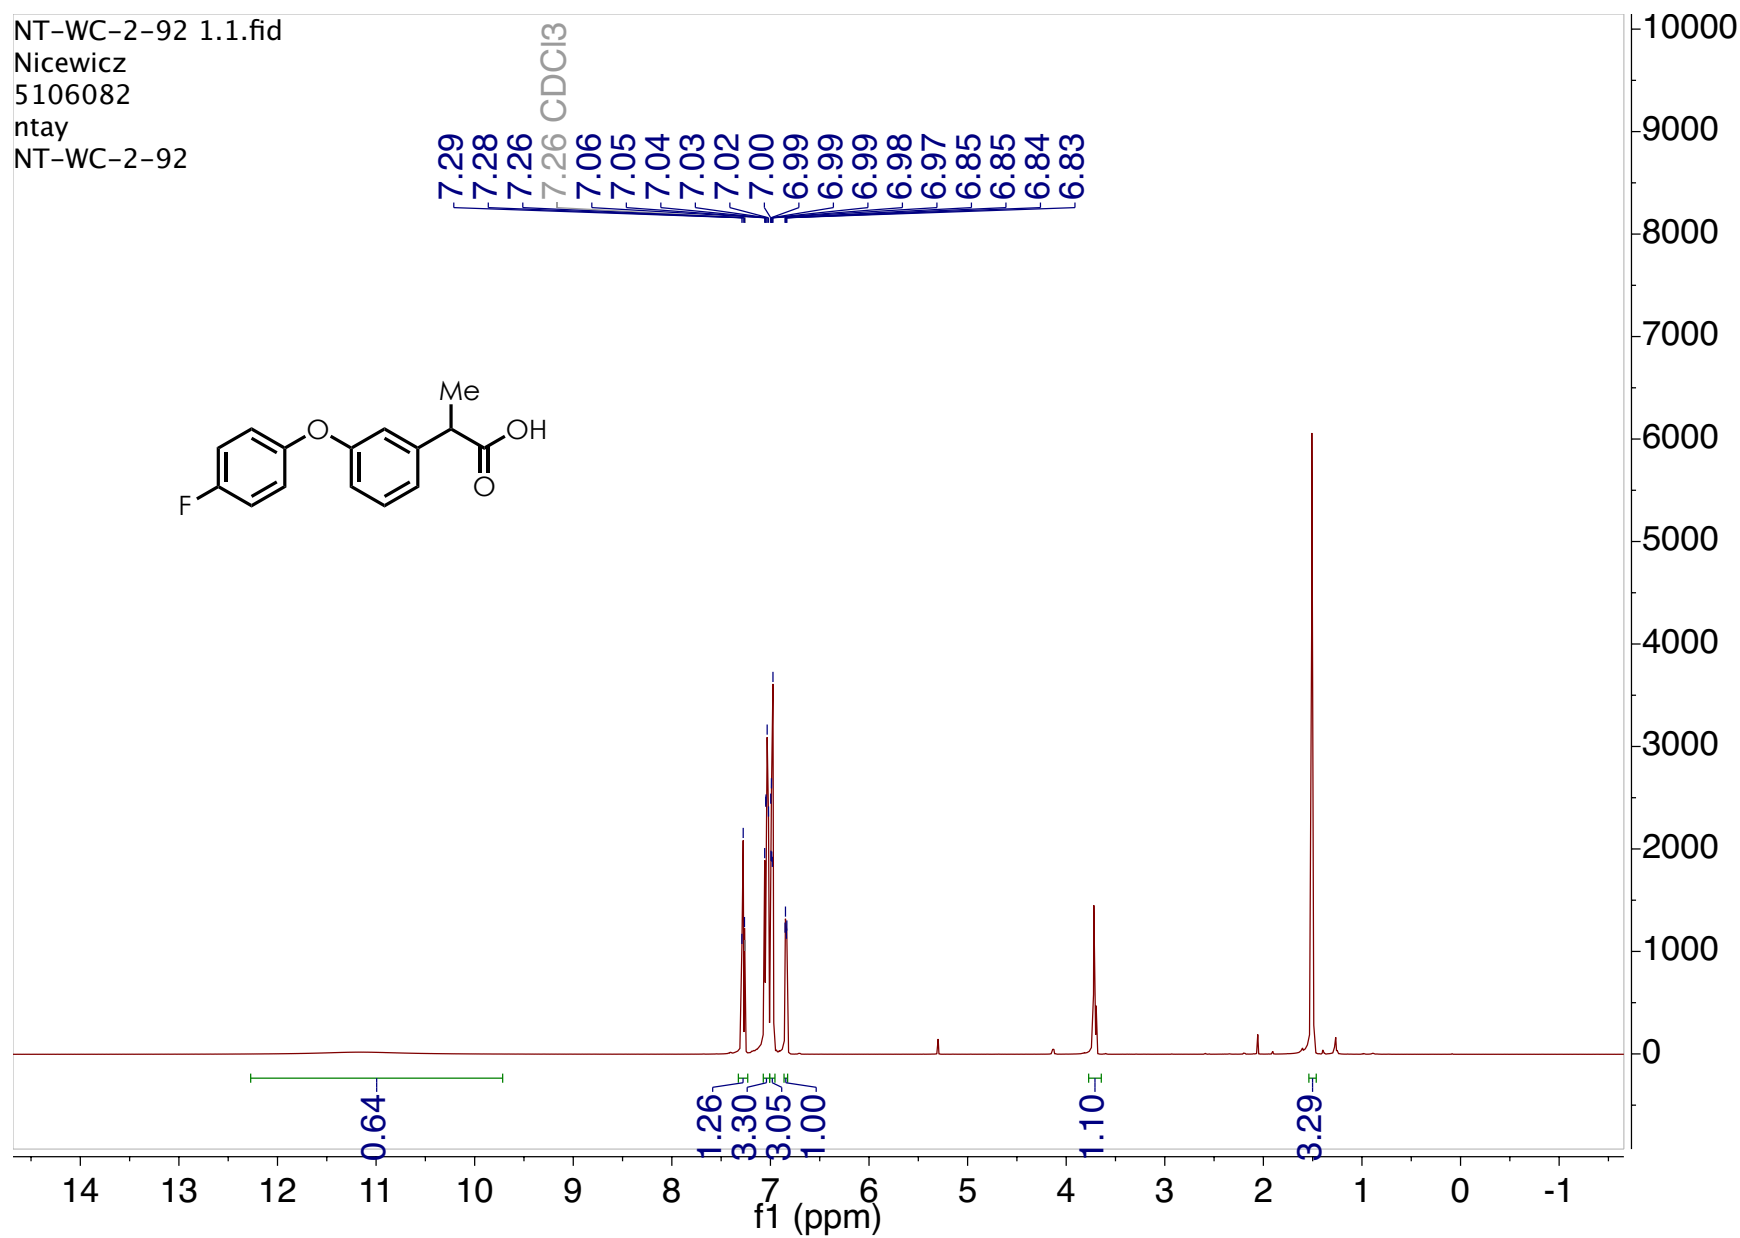

NT-WC-2-92 2.2.fid  
Nicewicz  
5106082  
ntay  
NT-WC-2-92

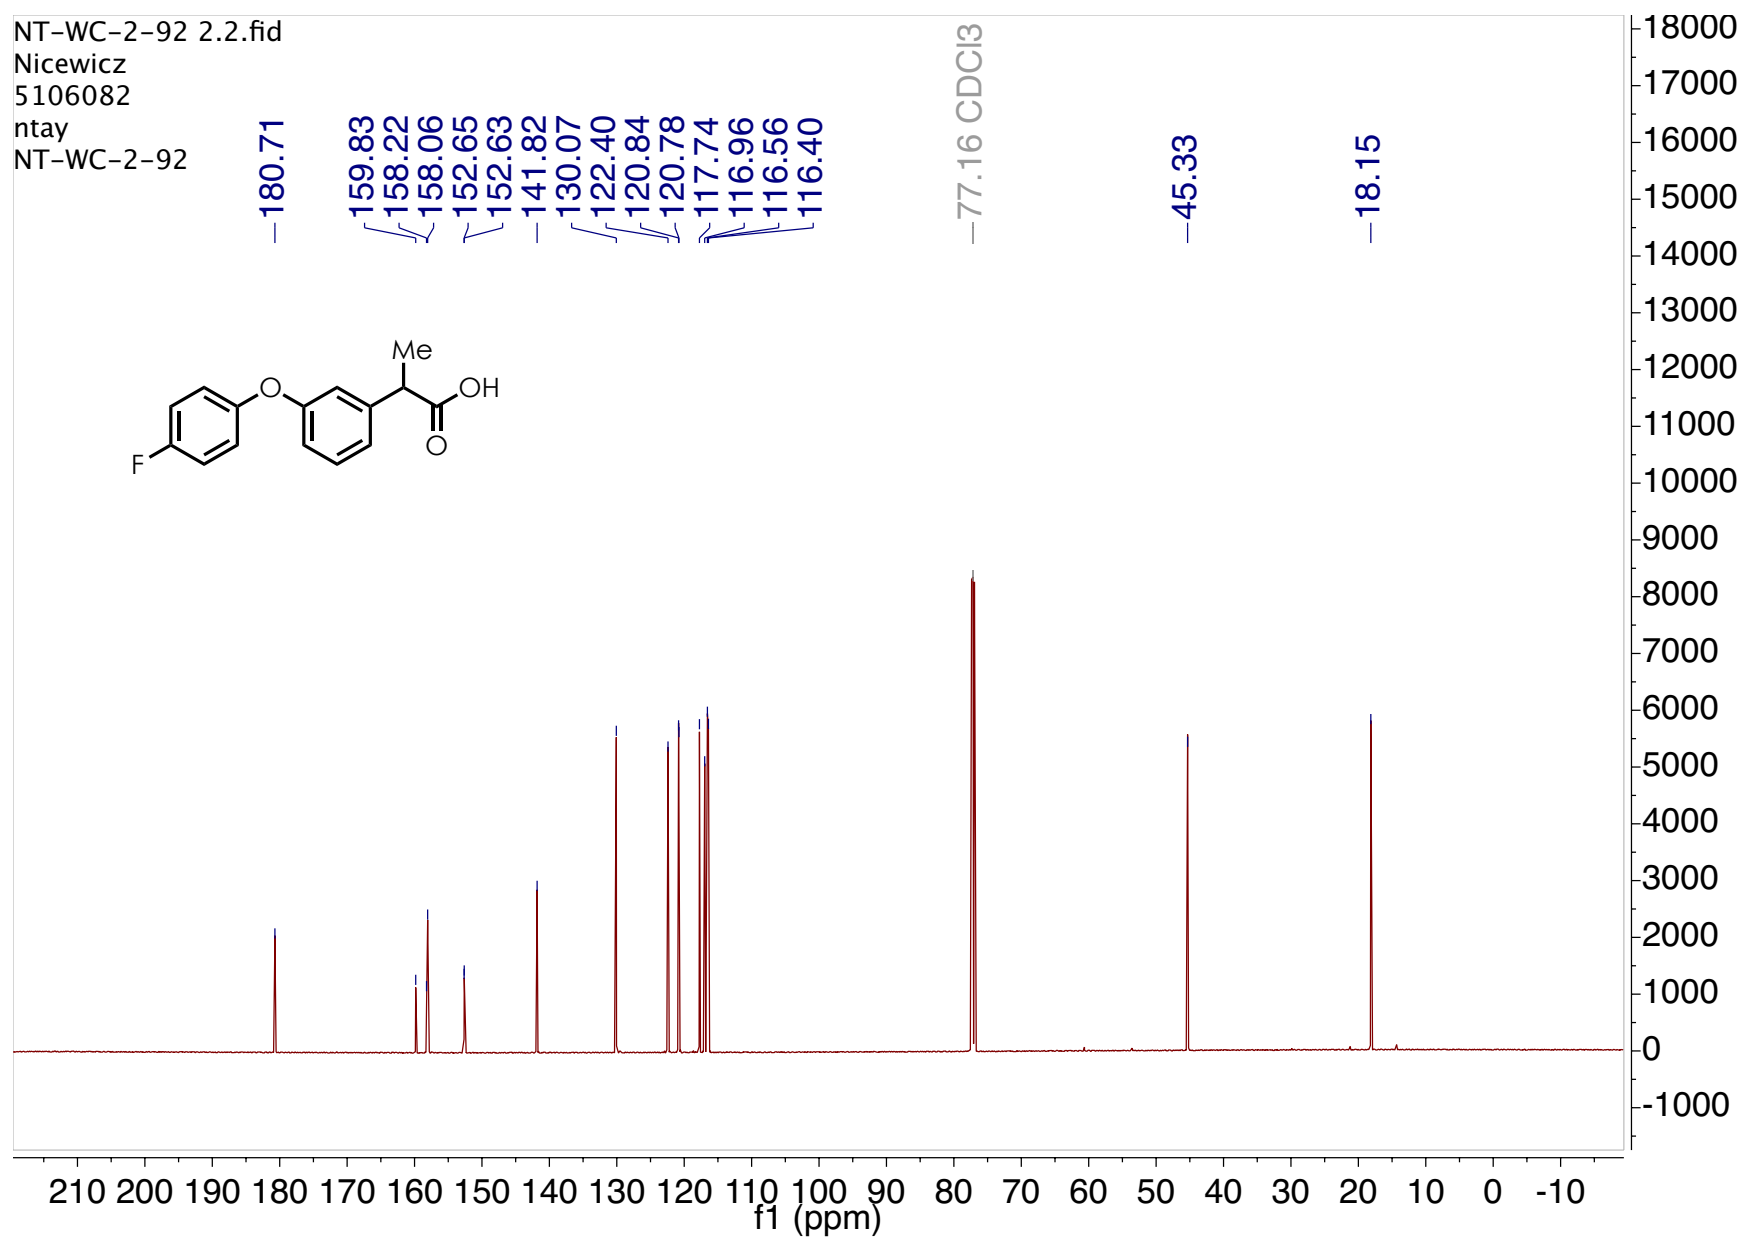

NT-WC-2-92 3.1.fid

F19 CDCl<sub>3</sub> {C:\data\ntay} nmrsu 51

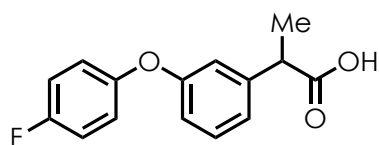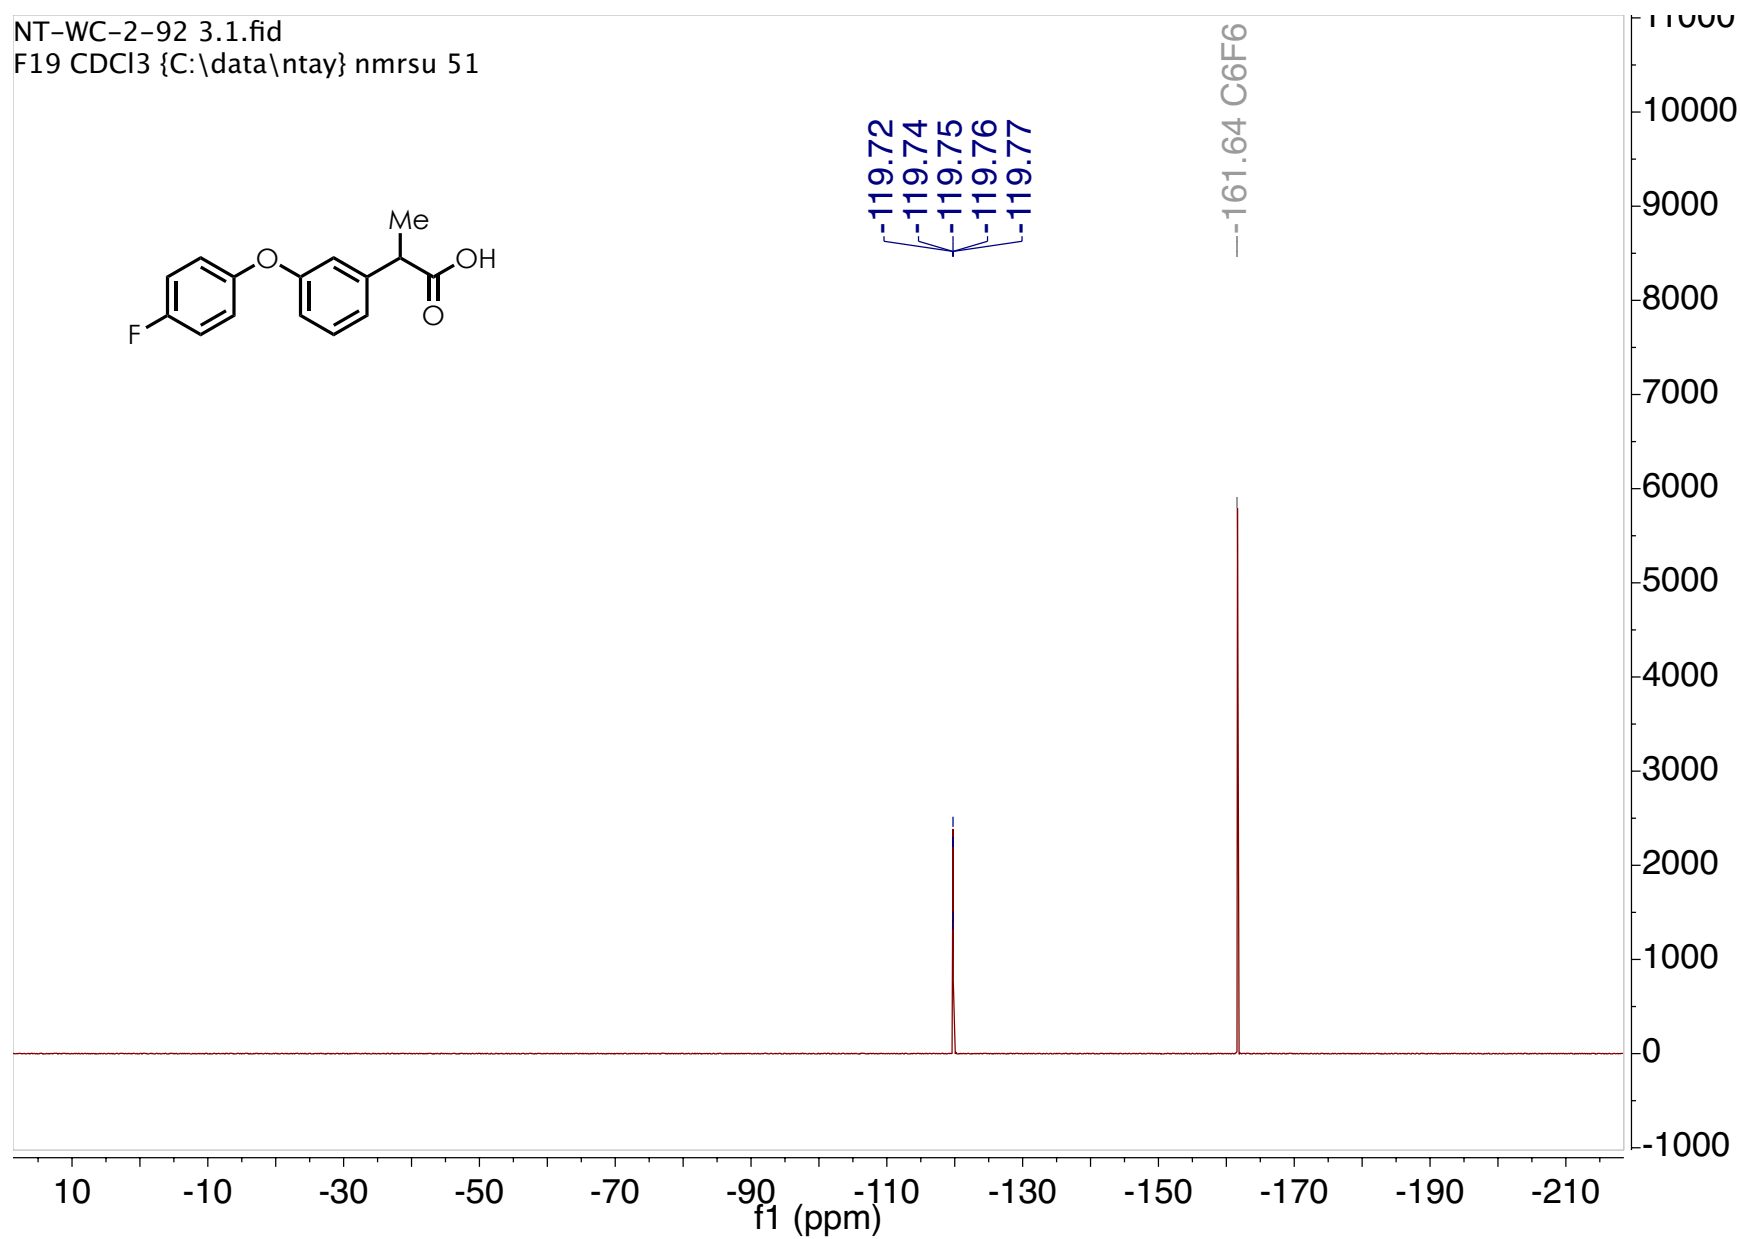

## 9. Movie Captions

**Movie S1: *In vivo* composite PET/CT scans of a MCF-7 xenograft mouse model injected with radiotracer 39.** PET radiotracer 39 is predominantly localized in the MCF-7 tumor, pancreas and bladder (cf. Figures 3 and S95).

**Movie S2: *In vivo* composite PET/CT scans of a MCF-7 xenograft mouse model injected with radiotracer 41.** PET radiotracer 41 is predominantly localized in the heart, liver and bladder, with minimal uptake in the MCF-7 tumor (cf. Figures 3 and S95).

**Movie S3: *In vivo* composite PET/CT scans of a U-87 MG xenograft mouse model injected with radiotracer 39.** PET radiotracer 39 is predominantly localized in the U-87 MG tumor, pancreas and bladder (cf. Figure S95).

## 10. References and Notes

1. S. Preshlock, M. Tredwell, V. Gouverneur,  $^{18}\text{F}$ -Labeling of arenes and heteroarenes for applications in positron emission tomography. *Chem. Rev.* **116**, 719–766 (2016). [doi:10.1021/acs.chemrev.5b00493](https://doi.org/10.1021/acs.chemrev.5b00493) [Medline](#)
2. G. J. Kelloff, J. M. Hoffman, B. Johnson, H. I. Scher, B. A. Siegel, E. Y. Cheng, B. D. Cheson, J. O'shaughnessy, K. Z. Guyton, D. A. Mankoff, L. Shankar, S. M. Larson, C. C. Sigman, R. L. Schilsky, D. C. Sullivan, Progress and promise of FDG-PET imaging for cancer patient management and oncologic drug development. *Clin. Cancer Res.* **11**, 2785–2808 (2005). [doi:10.1158/1078-0432.CCR-04-2626](https://doi.org/10.1158/1078-0432.CCR-04-2626) [Medline](#)
3. H. H. Coenen, P. H. Elsinga, R. Iwata, M. R. Kilbourn, M. R. A. Pillai, M. G. R. Rajan, H. N. Wagner Jr., J. J. Zaknun, Fluorine-18 radiopharmaceuticals beyond [ $^{18}\text{F}$ ]FDG for use in oncology and neurosciences. *Nucl. Med. Biol.* **37**, 727–740 (2010). [doi:10.1016/j.nucmedbio.2010.04.185](https://doi.org/10.1016/j.nucmedbio.2010.04.185) [Medline](#)
4. E. P. Gillis, K. J. Eastman, M. D. Hill, D. J. Donnelly, N. A. Meanwell, Applications of fluorine in medicinal chemistry. *J. Med. Chem.* **58**, 8315–8359 (2015). [doi:10.1021/acs.jmedchem.5b00258](https://doi.org/10.1021/acs.jmedchem.5b00258) [Medline](#)
5. N. A. Meanwell, Fluorine and fluorinated motifs in the design and application of bioisosteres for drug design. *J. Med. Chem.* **61**, 5822–5880 (2018). [doi:10.1021/acs.jmedchem.7b01788](https://doi.org/10.1021/acs.jmedchem.7b01788) [Medline](#)
6. R. J. Nickles, M. E. Daube, T. J. Ruth, An  $^{18}\text{O}_2$  target for the production of [ $^{18}\text{F}$ ]F $_2$ . *Int. J. Appl. Radiat. Isot.* **35**, 117–122 (1984). [doi:10.1016/0020-708X\(84\)90194-7](https://doi.org/10.1016/0020-708X(84)90194-7)
7. A. Krzyczmonik, T. Keller, A. K. Kirjavainen, S. Forsback, O. Solin, Vacuum ultraviolet photon-mediated production of [ $^{18}\text{F}$ ]F $_2$ . *J. Labelled Comp. Radiopharm.* **60**, 186–193 (2017). [doi:10.1002/jlcr.3489](https://doi.org/10.1002/jlcr.3489) [Medline](#)
8. H. H. Coenen, A. D. Gee, M. Adam, G. Antoni, C. S. Cutler, Y. Fujibayashi, J. M. Jeong, R. H. Mach, T. L. Mindt, V. W. Pike, A. D. Windhorst, Consensus nomenclature rules for radiopharmaceutical chemistry - Setting the record straight. *Nucl. Med. Biol.* **55**, v–xi (2017). [doi:10.1016/j.nucmedbio.2017.09.004](https://doi.org/10.1016/j.nucmedbio.2017.09.004) [Medline](#)
9. H. Teare, E. G. Robins, A. Kirjavainen, S. Forsback, G. Sandford, O. Solin, S. K. Luthra, V. Gouverneur, Radiosynthesis and evaluation of [ $^{18}\text{F}$ ]Selectfluor bis(triflate). *Angew. Chem. Int. Ed.* **49**, 6821–6824 (2010). [doi:10.1002/anie.201002310](https://doi.org/10.1002/anie.201002310) [Medline](#)
10. N. J. Taylor, E. Emer, S. Preshlock, M. Schedler, M. Tredwell, S. Verhoog, J. Mercier, C. Genicot, V. Gouverneur, Derisking the Cu-mediated  $^{18}\text{F}$ -fluorination of heterocyclic positron emission tomography radioligands. *J. Am. Chem. Soc.* **139**, 8267–8276 (2017). [doi:10.1021/jacs.7b03131](https://doi.org/10.1021/jacs.7b03131) [Medline](#)
11. C. N. Neumann, J. M. Hooker, T. Ritter, Concerted nucleophilic aromatic substitution with  $^{19}\text{F}^-$  and  $^{18}\text{F}^-$ . *Nature* **534**, 369–373 (2016). [doi:10.1038/nature17667](https://doi.org/10.1038/nature17667)
12. M. K. Narayanam, G. Ma, P. A. Champagne, K. N. Houk, J. M. Murphy, Synthesis of [ $^{18}\text{F}$ ]fluoroarenes by nucleophilic radiofluorination of *N*-arylsydnone. *Angew. Chem. Int. Ed.* **56**, 13006–13010 (2017). [doi:10.1002/anie.201707274](https://doi.org/10.1002/anie.201707274) [Medline](#)

13. T. Gendron, K. Sander, K. Cybulska, L. Benhamou, P. K. B. Sin, A. Khan, M. Wood, M. J. Porter, E. Årstad, Ring-closing synthesis of dibenzothiophene sulfonium salts and their use as leaving groups for aromatic  $^{18}\text{F}$ -fluorination. *J. Am. Chem. Soc.* **140**, 11125–11132 (2018). [doi:10.1021/jacs.8b06730](https://doi.org/10.1021/jacs.8b06730) [Medline](#)
14. E. Lee, A. S. Kamlet, D. C. Powers, C. N. Neumann, G. B. Boursalian, T. Furuya, D. C. Choi, J. M. Hooker, T. Ritter, A fluoride-derived electrophilic late-stage fluorination reagent for PET imaging. *Science* **334**, 639–642 (2011). [doi:10.1126/science.1212625](https://doi.org/10.1126/science.1212625) [Medline](#)
15. E. Lee, J. M. Hooker, T. Ritter, Nickel-mediated oxidative fluorination for PET with aqueous  $^{18}\text{F}$  fluoride. *J. Am. Chem. Soc.* **134**, 17456–17458 (2012). [doi:10.1021/ja3084797](https://doi.org/10.1021/ja3084797) [Medline](#)
16. N. Ichiishi, A. F. Brooks, J. J. Topczewski, M. E. Rodnick, M. S. Sanford, P. J. H. Scott, Copper-catalyzed  $^{18}\text{F}$  fluorination of (mesityl)(aryl)iodonium salts. *Org. Lett.* **16**, 3224–3227 (2014). [doi:10.1021/ol501243g](https://doi.org/10.1021/ol501243g) [Medline](#)
17. M. S. McCammant, S. Thompson, A. F. Brooks, S. W. Krska, P. J. H. Scott, M. S. Sanford, Cu-Mediated C-H  $^{18}\text{F}$ -fluorination of electron-rich (hetero)arenes. *Org. Lett.* **19**, 3939–3942 (2017). [doi:10.1021/acs.orglett.7b01902](https://doi.org/10.1021/acs.orglett.7b01902) [Medline](#)
18. A. V. Mossine, A. F. Brooks, K. J. Makaravage, J. M. Miller, N. Ichiishi, M. S. Sanford, P. J. H. Scott, Synthesis of  $^{18}\text{F}$  arenes via the copper-mediated  $^{18}\text{F}$  fluorination of boronic acids. *Org. Lett.* **17**, 5780–5783 (2015). [doi:10.1021/acs.orglett.5b02875](https://doi.org/10.1021/acs.orglett.5b02875) [Medline](#)
19. M. Tredwell, S. M. Preshlock, N. J. Taylor, S. Gruber, M. Huiban, J. Passchier, J. Mercier, C. Génicot, V. Gouverneur, A general copper-mediated nucleophilic  $^{18}\text{F}$  fluorination of arenes. *Angew. Chem. Int. Ed.* **53**, 7751–7755 (2014). [doi:10.1002/anie.201404436](https://doi.org/10.1002/anie.201404436) [Medline](#)
20. K. J. Makaravage, A. F. Brooks, A. V. Mossine, M. S. Sanford, P. J. H. Scott, Copper-mediated radiofluorination of arylstannanes with  $^{18}\text{F}$  KF. *Org. Lett.* **18**, 5440–5443 (2016). [doi:10.1021/acs.orglett.6b02911](https://doi.org/10.1021/acs.orglett.6b02911) [Medline](#)
21. Y. Sasson, N. Mushkin, E. Abu, S. Negussie, S. Dermeik, A. Zoran, Fluoride anion as a base and a nucleophile in phase-transfer catalysis of uncharged species. *ACS Symp. Ser.* **659**, 148–162 (1997). [doi:10.1021/bk-1997-0659.ch012](https://doi.org/10.1021/bk-1997-0659.ch012)
22. K. C. Harper, E. G. Moschetta, S. V. Bordawekar, S. J. Wittenberger, A laser driven flow chemistry platform for scaling photochemical reactions with visible light. *ACS Cent. Sci.* **5**, 109–115 (2019). [doi:10.1021/acscentsci.8b00728](https://doi.org/10.1021/acscentsci.8b00728) [Medline](#)
23. N. A. Romero, K. A. Margrey, N. E. Tay, D. A. Nicewicz, Site-selective arene C-H amination via photoredox catalysis. *Science* **349**, 1326–1330 (2015). [doi:10.1126/science.aac9895](https://doi.org/10.1126/science.aac9895) [Medline](#)
24. J. B. McManus, D. A. Nicewicz, Direct C-H cyanation of arenes via organic photoredox catalysis. *J. Am. Chem. Soc.* **139**, 2880–2883 (2017). [doi:10.1021/jacs.6b12708](https://doi.org/10.1021/jacs.6b12708) [Medline](#)
25. K. A. Margrey, J. B. McManus, S. Bonazzi, F. Zecri, D. A. Nicewicz, Predictive model for site-selective aryl and heteroaryl C-H functionalization via organic photoredox catalysis. *J. Am. Chem. Soc.* **139**, 11288–11299 (2017). [doi:10.1021/jacs.7b06715](https://doi.org/10.1021/jacs.7b06715) [Medline](#)

26. E. Vitaku, D. T. Smith, J. T. Njardarson, Analysis of the structural diversity, substitution patterns, and frequency of nitrogen heterocycles among U.S. FDA approved pharmaceuticals. *J. Med. Chem.* **57**, 10257–10274 (2014). [doi:10.1021/jm501100b](https://doi.org/10.1021/jm501100b) [Medline](#)
27. M. Laube, T. Kniess, J. Pietzsch, Radiolabeled COX-2 inhibitors for non-invasive visualization of COX-2 expression and activity—A critical update. *Molecules* **18**, 6311–6355 (2013). [doi:10.3390/molecules18066311](https://doi.org/10.3390/molecules18066311) [Medline](#)
28. X. Deng, J. Rong, L. Wang, N. Vasdev, L. Zhang, L. Josephson, S. H. Liang, Chemistry for positron emission tomography: Recent advances in  $^{11}\text{C}$ -,  $^{18}\text{F}$ -,  $^{13}\text{N}$ -, and  $^{15}\text{O}$ -labeling reactions. *Angew. Chem. Int. Ed.* **58**, 2580–2605 (2019). [doi:10.1002/anie.201805501](https://doi.org/10.1002/anie.201805501) [Medline](#)
29. B. K. Park, N. R. Kitteringham, P. M. O'Neill, Metabolism of fluorine-containing drugs. *Annu. Rev. Pharmacol. Toxicol.* **41**, 443–470 (2001). [doi:10.1146/annurev.pharmtox.41.1.443](https://doi.org/10.1146/annurev.pharmtox.41.1.443) [Medline](#)
30. J. Koerts, A. E. M. F. Soffers, J. Vervoort, A. De Jager, I. M. C. M. Rietjens, Occurrence of the NIH shift upon the cytochrome P450-catalyzed in vivo and in vitro aromatic ring hydroxylation of fluorobenzenes. *Chem. Res. Toxicol.* **11**, 503–512 (1998). [doi:10.1021/tx980053i](https://doi.org/10.1021/tx980053i) [Medline](#)
31. P. Shah, A. D. Westwell, The role of fluorine in medicinal chemistry. *J. Enzyme Inhib. Med. Chem.* **22**, 527–540 (2007). [doi:10.1080/14756360701425014](https://doi.org/10.1080/14756360701425014) [Medline](#)
32. T. D. Penning, J. J. Talley, S. R. Bertenshaw, J. S. Carter, P. W. Collins, S. Docter, M. J. Graneto, L. F. Lee, J. W. Malecha, J. M. Miyashiro, R. S. Rogers, D. J. Rogier, S. S. Yu, AndersonGD, E. G. Burton, J. N. Cogburn, S. A. Gregory, C. M. Koboldt, W. E. Perkins, K. Seibert, A. W. Veenhuizen, Y. Y. Zhang, P. C. Isakson, Synthesis and biological evaluation of the 1,5-diarylpyrazole class of cyclooxygenase-2 inhibitors: Identification of 4-[5-(4-methylphenyl)-3-(trifluoromethyl)-1H-pyrazol-1-yl]benzenesulfonamide (SC-58635, celecoxib). *J. Med. Chem.* **40**, 1347–1365 (1997). [doi:10.1021/jm960803q](https://doi.org/10.1021/jm960803q) [Medline](#)
33. A. Lebedev, J. Jiao, J. Lee, F. Yang, N. Allison, H. Herschman, S. Sadeghi, Radiochemistry on electrodes: Synthesis of an  $^{18}\text{F}$ -labelled and in vivo stable COX-2 inhibitor. *PLOS ONE* **12**, e0176606 (2017). [doi:10.1371/journal.pone.0176606](https://doi.org/10.1371/journal.pone.0176606) [Medline](#)
34. B. Cryer, M. Feldman, Cyclooxygenase-1 and cyclooxygenase-2 selectivity of widely used nonsteroidal anti-inflammatory drugs. *Am. J. Med.* **104**, 413–421 (1998). [doi:10.1016/S0002-9343\(98\)00091-6](https://doi.org/10.1016/S0002-9343(98)00091-6) [Medline](#)
35. E. M. Isin, C. S. Elmore, G. N. Nilsson, R. A. Thompson, L. Weidolf, Use of radiolabeled compounds in drug metabolism and pharmacokinetic studies. *Chem. Res. Toxicol.* **25**, 532–542 (2012). [doi:10.1021/tx2005212](https://doi.org/10.1021/tx2005212) [Medline](#)
36. M. Pretze, D. Franck, F. Kunkel, E. Foßhag, C. Wängler, B. Wängler, Evaluation of two nucleophilic syntheses routes for the automated synthesis of 6- $^{18}\text{F}$ fluoro-L-DOPA. *Nucl. Med. Biol.* **45**, 35–42 (2017). [doi:10.1016/j.nucmedbio.2016.10.007](https://doi.org/10.1016/j.nucmedbio.2016.10.007) [Medline](#)

37. M. Pretze, C. Wängler, B. Wängler, 6-<sup>[18F]</sup>fluoro-L-DOPA: A well-established neurotracer with expanding application spectrum and strongly improved radiosyntheses. *BioMed Res. Int.* **2014**, 674063 (2014). [doi:10.1155/2014/674063](https://doi.org/10.1155/2014/674063) [Medline](#)
38. R. N. Brogden, R. M. Finder, T. M. Speight, G. S. Avery, Fenoprofen: A review of its pharmacological properties and therapeutic efficacy in rheumatic diseases. *Drugs* **13**, 241–265 (1977). [doi:10.2165/00003495-197713040-00001](https://doi.org/10.2165/00003495-197713040-00001) [Medline](#)
39. M. Madsen, P. R. Hansen, L. B. Nielsen, K. Hartvigsen, A. E. Pedersen, J. P. Christensen, A. Aarup, T. X. Pedersen, Effect of 12-O-tetradecanoylphorbol-13-acetate-induced psoriasis-like skin lesions on systemic inflammation and atherosclerosis in hypercholesterolaemic apolipoprotein E deficient mice. *BMC Dermatol.* **16**, 9 (2016). [doi:10.1186/s12895-016-0046-1](https://doi.org/10.1186/s12895-016-0046-1) [Medline](#)
40. A. Zhu, H. Shim, Current molecular imaging positron emitting radiotracers in oncology. *Nucl. Med. Mol. Imaging* **45**, 1–14 (2011). [doi:10.1007/s13139-011-0075-y](https://doi.org/10.1007/s13139-011-0075-y) [Medline](#)
41. Y. Qi, X. Liu, J. Li, H. Yao, S. Yuan, Fluorine-18 labeled amino acids for tumor PET/CT imaging. *Oncotarget* **8**, 60581–60588 (2017). [doi:10.18632/oncotarget.19943](https://doi.org/10.18632/oncotarget.19943) [Medline](#)
42. A. Sun, X. Liu, G. Tang, Carbon-11 and fluorine-18 labeled amino acid tracers for positron emission tomography imaging of tumors. *Front Chem.* **5**, 124 (2018). [doi:10.3389/fchem.2017.00124](https://doi.org/10.3389/fchem.2017.00124) [Medline](#)
43. W. Chen, Z. Huang, N. Tay, B. Giglio, M. Wang, H. Wang, Z. Wu, D. Nicewicz, Z. Li, #39 in MCF-7 and U87MG tumor models at different time points, Zenodo (2019); <https://doi.org/10.5281/zenodo.3228508>.
44. W. Chen, Z. Huang, N. Tay, B. Giglio, M. Wang, H. Wang, Z. Wu, D. Nicewicz, Z. Li, #41 in MCF-7 tumor model at different time points, Zenodo (2019); <https://doi.org/10.5281/zenodo.3228551>.
45. W. Chen, Z. Huang, N. Tay, B. Giglio, M. Wang, H. Wang, Z. Wu, D. Nicewicz, Z. Li, #42 in ear inflammation model, Zenodo (2019); <https://doi.org/10.5281/zenodo.3228546>.
46. W. Chen, Z. Huang, N. Tay, B. Giglio, M. Wang, H. Wang, Z. Wu, D. Nicewicz, Z. Li, #42 dynamic PET scan, Zenodo (2019); <https://doi.org/10.5281/zenodo.3228534>.
47. W. Chen, Z. Huang, N. Tay, B. Giglio, M. Wang, H. Wang, Z. Wu, D. Nicewicz, Z. Li, File index, Zenodo (2019); <https://doi.org/10.5281/zenodo.3228554>.
48. C. P. Rosenau, B. J. Jeliet, A. D. Gossert, A. Togni, Exposing the origins of irreproducibility in fluorine NMR spectroscopy. *Angew. Chem. Int. Ed.* **57**, 9528–9533 (2018). [doi:10.1002/anie.201802620](https://doi.org/10.1002/anie.201802620) [Medline](#)
49. K.-F. Zhang, F. Christoffel, O. Baudoin, Barbier-Negishi coupling of secondary alkyl bromides with aryl and alkenyl triflates and nonaflates. *Angew. Chem. Int. Ed.* **57**, 1982–1986 (2018). [doi:10.1002/anie.201711990](https://doi.org/10.1002/anie.201711990) [Medline](#)
50. B. S. Bodnar, P. F. Vogt, An improved Bouveault-Blanc ester reduction with stabilized alkali metals. *J. Org. Chem.* **74**, 2598–2600 (2009). [doi:10.1021/jo802778z](https://doi.org/10.1021/jo802778z) [Medline](#)
51. B. A. Egan, M. Paradowski, L. H. Thomas, R. Marquez, Regiocontrolled rearrangement of isobenzofurans. *Org. Lett.* **13**, 2086–2089 (2011). [doi:10.1021/ol200498k](https://doi.org/10.1021/ol200498k) [Medline](#)

52. J. M. Miguez, L. A. Adrio, A. Sousa-Pedrares, J. M. Vila, K. K. M. Hii, A practical and general synthesis of unsymmetrical terphenyls. *J. Org. Chem.* **72**, 7771–7774 (2007). [doi:10.1021/jo701308b](https://doi.org/10.1021/jo701308b) [Medline](#)
53. X. Wang, P. Hu, F. Xue, Y. Wei, Cellulose-supported N-heterocyclic carbene-palladium catalyst: Synthesis and its applications in the Suzuki cross-coupling reaction. *Carbohydr. Polym.* **114**, 476–483 (2014). [doi:10.1016/j.carbpol.2014.08.030](https://doi.org/10.1016/j.carbpol.2014.08.030) [Medline](#)
54. T. W. Greulich, C. G. Daniliuc, A. Studer, N-aminopyridinium salts as precursors for N-centered radicals—Direct amidation of arenes and heteroarenes. *Org. Lett.* **17**, 254–257 (2015). [doi:10.1021/ol503338b](https://doi.org/10.1021/ol503338b) [Medline](#)
55. N. K. Brennan, D. J. Donnelly, M. R. Detty, Selenoxanthenes via directed metalations in 2-arylselenobenzamide derivatives. *J. Org. Chem.* **68**, 3344–3347 (2003). [doi:10.1021/jo026635t](https://doi.org/10.1021/jo026635t) [Medline](#)
56. J. Lee, J. Lee, M.-S. Kang, K.-P. Kim, S.-J. Chung, P. M. Blumberg, J.-B. Yi, Y. H. Park, Phenolic modification as an approach to improve the pharmacology of the 3-acyloxy-2-benzylpropyl homovanillic amides and thioureas, a promising class of vanilloid receptor agonists and analgesics. *Bioorg. Med. Chem.* **10**, 1171–1179 (2002). [doi:10.1016/S0968-0896\(01\)00387-X](https://doi.org/10.1016/S0968-0896(01)00387-X) [Medline](#)
57. D. Zornik, R. M. Meudtner, T. El Malah, C. M. Thiele, S. Hecht, Designing structural motifs for clickamers: Exploiting the 1,2,3-triazole moiety to generate conformationally restricted molecular architectures. *Chemistry* **17**, 1473–1484 (2011). [doi:10.1002/chem.201002491](https://doi.org/10.1002/chem.201002491) [Medline](#)
58. M. A. Windsor, D. J. Hermanson, P. J. Kingsley, S. Xu, B. C. Crews, W. Ho, C. M. Keenan, S. Banerjee, K. A. Sharkey, L. J. Marnett, Substrate-selective inhibition of cyclooxygenase-2: Development and evaluation of achiral profen probes. *ACS Med. Chem. Lett.* **3**, 759–763 (2012). [doi:10.1021/ml3001616](https://doi.org/10.1021/ml3001616) [Medline](#)
59. Y. Chen, J. Sun, Z. Huang, H. Liao, S. Peng, J. Lehmann, Y. Zhang, NO-donating tacrine derivatives as potential butyrylcholinesterase inhibitors with vasorelaxation activity. *Bioorg. Med. Chem. Lett.* **23**, 3162–3165 (2013). [doi:10.1016/j.bmcl.2013.04.008](https://doi.org/10.1016/j.bmcl.2013.04.008) [Medline](#)
60. C. Visintin, A. E. Aliev, D. Riddall, D. Baker, M. Okuyama, P. M. Hoi, R. Hiley, D. L. Selwood, Membrane receptor probes: Solid-phase synthesis of biotin-Asp-PEG-arvanil derivatives. *Org. Lett.* **7**, 1699–1702 (2005). [doi:10.1021/ol0502578](https://doi.org/10.1021/ol0502578) [Medline](#)
61. A. J. Ross, H. L. Lang, R. F. W. Jackson, Much improved conditions for the Negishi cross-coupling of iodoalanine derived zinc reagents with aryl halides. *J. Org. Chem.* **75**, 245–248 (2010). [doi:10.1021/jo902238n](https://doi.org/10.1021/jo902238n) [Medline](#)
62. Z.-T. He, Y.-S. Zhao, P. Tian, C.-C. Wang, H.-Q. Dong, G.-Q. Lin, Copper-catalyzed asymmetric hydroboration of  $\alpha$ -dehydroamino acid derivatives: Facile synthesis of chiral  $\beta$ -hydroxy- $\alpha$ -amino acids. *Org. Lett.* **16**, 1426–1429 (2014). [doi:10.1021/ol500219e](https://doi.org/10.1021/ol500219e) [Medline](#)
63. N. Drinkwater, N. B. Vinh, S. N. Mistry, R. S. Bamert, C. Ruggeri, J. P. Holleran, S. Loganathan, A. Paiardini, S. A. Charman, A. K. Powell, V. M. Avery, S. McGowan, P. J. Scammells, Potent dual inhibitors of *Plasmodium falciparum* M1 and M17

- aminopeptidases through optimization of S1 pocket interactions. *Eur. J. Med. Chem.* **110**, 43–64 (2016). [doi:10.1016/j.ejmech.2016.01.015](https://doi.org/10.1016/j.ejmech.2016.01.015) [Medline](#)
64. K. Uehara, C. B. Wagner, T. Vogler, H. Luftmann, A. Studer, Poly(vinyl ketone)s by controlled boron group transfer polymerization (BGTP). *Angew. Chem. Int. Ed.* **49**, 3073–3076 (2010). [doi:10.1002/anie.200907163](https://doi.org/10.1002/anie.200907163) [Medline](#)
65. Y. Nishimoto, S. A. Babu, M. Yasuda, A. Baba, Esters as acylating reagent in a Friedel-Crafts reaction: Indium tribromide catalyzed acylation of arenes using dimethylchlorosilane. *J. Org. Chem.* **73**, 9465–9468 (2008). [doi:10.1021/jo801914x](https://doi.org/10.1021/jo801914x) [Medline](#)
66. C. R. Creveling, E. T. McNeal, D. Cantacuzene, K. L. Kirk, Influence of fluorine substitution on the site of enzymatic O-methylation of fluorinated norepinephrines. *J. Med. Chem.* **24**, 1395–1399 (1981). [doi:10.1021/jm00144a005](https://doi.org/10.1021/jm00144a005) [Medline](#)
67. X. Zhou, G. Zhang, B. Gao, H. Huang, Palladium-catalyzed hydrocarbonylative C-N coupling of alkenes with amides. *Org. Lett.* **20**, 2208–2212 (2018). [doi:10.1021/acs.orglett.8b00538](https://doi.org/10.1021/acs.orglett.8b00538) [Medline](#)
68. X. Yuan, J.-F. Yao, Z.-Y. Tang, Decarboxylative fluorination of electron-rich heteroaromatic carboxylic acids with selectfluor. *Org. Lett.* **19**, 1410–1413 (2017). [doi:10.1021/acs.orglett.7b00335](https://doi.org/10.1021/acs.orglett.7b00335) [Medline](#)
69. N. Said, Patent WO2008040994 (A2), April 10, 2008.
70. T. Fujimoto, T. Ritter, PhenoFluorMix: Practical chemoselective deoxyfluorination of phenols. *Org. Lett.* **17**, 544–547 (2015). [doi:10.1021/ol5035518](https://doi.org/10.1021/ol5035518) [Medline](#)
71. J. B. Ernst, N. E. S. Tay, N. T. Jui, S. L. Buchwald, Regioselective synthesis of benzimidazolones via cascade C-N coupling of monosubstituted ureas. *Org. Lett.* **16**, 3844–3846 (2014). [doi:10.1021/ol501531q](https://doi.org/10.1021/ol501531q) [Medline](#)
72. T. Lehmann-Lintz, A. Heckel, L. Thomas, M. Mark, Patent US2003166637 (A1), September 4, 2003.
73. M. Keenan, M. J. Abbott, P. W. Alexander, T. Armstrong, W. M. Best, B. Berven, A. Botero, J. H. Chaplin, S. A. Charman, E. Chatelain, T. W. von Geldern, M. Kerfoot, A. Khong, T. Nguyen, J. D. McManus, J. Morizzi, E. Ryan, I. Scandale, R. A. Thompson, S. Z. Wang, K. L. White, Analogues of fenarimol are potent inhibitors of *Trypanosoma cruzi* and are efficacious in a murine model of Chagas disease. *J. Med. Chem.* **55**, 4189–4204 (2012). [doi:10.1021/jm2015809](https://doi.org/10.1021/jm2015809) [Medline](#)
74. Y.-L. Song, M. L. Peach, P. P. Roller, S. Qiu, S. Wang, Y.-Q. Long, Discovery of a novel nonphosphorylated pentapeptide motif displaying high affinity for Grb2-SH2 domain by the utilization of 3'-substituted tyrosine derivatives. *J. Med. Chem.* **49**, 1585–1596 (2006). [doi:10.1021/jm050910x](https://doi.org/10.1021/jm050910x) [Medline](#)
75. J. Nie, K. L. Kirk, Synthesis of metabolites of 6-fluoro-DOPA. *J. Fluor. Chem.* **55**, 259–269 (1991). [doi:10.1016/S0022-1139\(00\)82354-4](https://doi.org/10.1016/S0022-1139(00)82354-4)
76. W.-P. Deng, K. A. Wong, K. L. Kirk, Convenient syntheses of 2-, 5- and 6-fluoro- and 2,6-difluoro-L-DOPA. *Tetrahedron Asymmetry* **13**, 1135–1140 (2002). [doi:10.1016/S0957-4166\(02\)00321-X](https://doi.org/10.1016/S0957-4166(02)00321-X)

77. T. Furuya, A. E. Strom, T. Ritter, Silver-mediated fluorination of functionalized aryl stannanes. *J. Am. Chem. Soc.* **131**, 1662–1663 (2009). [doi:10.1021/ja8086664](https://doi.org/10.1021/ja8086664) [Medline](#)
78. C. Yang, R. Edsall Jr., H. A. Harris, X. Zhang, E. S. Manas, R. E. Mewshaw, ERbeta ligands. Part 2: Synthesis and structure-activity relationships of a series of 4-hydroxy-biphenyl-carbaldehyde oxime derivatives. *Bioorg. Med. Chem.* **12**, 2553–2570 (2004). [doi:10.1016/j.bmc.2004.03.028](https://doi.org/10.1016/j.bmc.2004.03.028) [Medline](#)
79. Q. Cao, W. Cai, Z.-B. Li, K. Chen, L. He, H.-C. Li, M. Hui, X. Chen, PET imaging of acute and chronic inflammation in living mice. *Eur. J. Nucl. Med. Mol. Imaging* **34**, 1832–1842 (2007). [doi:10.1007/s00259-007-0451-0](https://doi.org/10.1007/s00259-007-0451-0) [Medline](#)
80. E. H. Ahn, D. W. Kim, H. W. Kang, M. J. Shin, M. H. Won, J. Kim, D. J. Kim, O.-S. Kwon, T.-C. Kang, K. H. Han, J. Park, W. S. Eum, S. Y. Choi, Transduced PEP-1-ribosomal protein S3 (rpS3) ameliorates 12-O-tetradecanoylphorbol-13-acetate-induced inflammation in mice. *Toxicology* **276**, 192–197 (2010). [doi:10.1016/j.tox.2010.08.004](https://doi.org/10.1016/j.tox.2010.08.004) [Medline](#)
81. M. J. Frisch, G. W. Trucks, H. B. Schlegel, G. E. Scuseria, M. A. Robb, J. R. Cheeseman, G. Scalmani, V. Barone, G. A. Petersson, H. Nakatsuji, X. Li, M. Caricato, A. Marenich, J. Bloino, B. G. Janesko, R. Gomperts, B. Mennucci, H. P. Hratchian, J. V. Ortiz, A. F. Izmaylov, J. L. Sonnenberg, D. Williams-Young, F. Ding, F. Lipparini, F. Egidi, J. Goings, B. Peng, A. Petrone, T. Henderson, D. Ranasinghe, V. G. Zakrzewski, J. Gao, N. Rega, G. Zheng, W. Liang, M. Hada, M. Ehara, K. Toyota, R. Fukuda, J. Hasegawa, M. Ishida, T. Nakajima, Y. Honda, O. Kitao, H. Nakai, T. Vreven, K. Throssell, J. A. Montgomery, Jr., J. E. Peralta, F. Ogliaro, M. Bearpark, J. J. Heyd, E. Brothers, K. N. Kudin, V. N. Staroverov, T. Keith, R. Kobayashi, J. Normand, K. Raghavachari, A. Rendell, J. C. Burant, S. S. Iyengar, J. Tomasi, M. Cossi, J. M. Millam, M. Klene, C. Adamo, R. Cammi, J. W. Ochterski, R. L. Martin, K. Morokuma, O. Farkas, J. B. Foresman, D. J. Fox, Gaussian 09, Revision B.01 (Gaussian, Inc., 2009).
